# Supplementary material for: Syndemic geographic patterns of cancer risk in a health-deprived area of England
Source: PubMed Central journal article supplement (PMC11564078; doi:10.1016/j.puhip.2024.100552), 2024-10-25
Supplement: mmc1.pdf [file mmc1.pdf]

# Syndemic Geographic Patterns of Cancer Risk in a Health-Deprived Area of England

Supplementary files (omnibus)

To navigate between Supplementary Files please use the Bookmarks tab.

## Supplementary Information S1: Syndemic frameworks and joint modelling

Cancers are an ideal candidate disease complex to be analysed by syndemic frameworks due to the shared risk factors of different cancer types (socio-demographic, anthropometric and lifestyle factors), and their common empirical geographical patterns (1, 2). Methodologically, syndemic frameworks can be analysed by employing joint models whose joint component can include the risk factors affecting the average risk (named fixed effects) of the cancers and/or variables influencing the variability of the cancers (named random effects, as for example, spatial, temporal and spatial-temporal autocorrelations) caused by the dependency and association between measurements in space and/or time (3). It has been shown in other studies that joint modelling results in better performance than individual models with an independent set of random effects (4, 5). Shared random effects can identify geographic areas with unmeasured or unknown risk factors that are common for different cancers among multiple population groups for gender, ethnicity and age distributions (4).

Given the complexity of relationships between demographic, behavioural and socio-economic conditions, and cancer morbidity measures, evaluation of geographical risk must consider the local scale factors influencing cancer dynamics. Variation within the study region, apart from revealing important local differences in risk can, in turn, provide aetiological clues. In the present study, we developed a Bayesian hierarchical joint spatial analysis for left-censored counts of newly diagnosed cancer types (censored to remove patients' identifiability), provided for each postcode sector, to investigate the variation in each cancer risk, joint cancer risk and cancers' correlations, across the Morecambe Bay region in the North West of England.

## References

1. Jahan F, Duncan EW, Cramb SM, Baade PD, Mengersen KL. Multivariate Bayesian meta-analysis: joint modelling of multiple cancer types using summary statistics. *Int J Health Geogr.* 2020;19(1):42.
2. Gomez-Rubio V, Palmi-Perales F, Lopez-Abente G, Ramis-Prieto R, Fernandez-Navarro P. Bayesian joint spatio-temporal analysis of multiple diseases. *Sort-Stat Oper Res T.* 2019;43(1):51-74.
3. Król A, Ferrer L, Pignon J-P, Proust-Lima C, Ducreux M, Bouché O, et al. Joint model for left-censored longitudinal data, recurrent events and terminal event: Predictive abilities of tumor burden for cancer evolution with application to the FFCD 2000–05 trial. *Biometrics.* 2016;72(3):907-16.
4. Wah W, Ahern S, Earnest A. A systematic review of Bayesian spatial-temporal models on cancer incidence and mortality. *Int J Public Health.* 2020;65(5):673-82.

5. Kouame RMA, Edi AVC, Cain RJ, Weetman D, Donnelly MJ, Sedda L. Joint spatial modelling of malaria incidence and vector's abundance shows heterogeneity in malaria-vector geographical relationships. *Journal of Applied Ecology*. 2023.

## Supplementary Information S2: Cancers in the North West of England

The North West of England had the highest oral cancer incidence rates in the period 1990-1999 (1); the highest uveal melanoma admission rates between 1999-2010 (2) with Lancashire also experiencing the highest cutaneous melanoma; the second highest glioblastoma (a fast growing type of brain tumour) incidence and the lowest survival in 2007-2011 (3); higher incidence (2008-2010) and mortality (2009-2011) rates, compared to England, of head and neck cancer in the Merseyside and Cheshire region (4); and finally the lowest incidence of basal cell carcinoma (the most common skin cancer) between 2004 and 2010 (5). Compared with London, the North West of England had a higher incidence rate for liver cancer subtypes hepatocellular carcinoma and intrahepatic cholangiocarcinoma between 2008 and 2018 (6); while compared to the whole UK, the North of England had the highest rates of lung cancer in non-smokers for men and women during the period 1998 to 2007 (7).

## References

1. Conway DI, Stockton DL, Warnakulasuriya KA, Ogden G, Macpherson LM. Incidence of oral and oropharyngeal cancer in United Kingdom (1990-1999) -- recent trends and regional variation. *Oral Oncol.* 2006;42(6):586-92.
2. Keenan TD, Yeates D, Goldacre MJ. Uveal melanoma in England: trends over time and geographical variation. *Br J Ophthalmol.* 2012;96(11):1415-9.
3. Brodbelt A, Greenberg D, Winters T, Williams M, Vernon S, Collins VP, National Cancer Information Network Brain Tumour G. Glioblastoma in England: 2007-2011. *Eur J Cancer.* 2015;51(4):533-42.
4. Taib BG, Oakley J, Dailey Y, Hodge I, Wright P, du Plessis R, et al. Socioeconomic deprivation and the burden of head and neck cancer-Regional variations of incidence and mortality in Merseyside and Cheshire, North West, England. *Clin Otolaryngol.* 2018;43(3):846-53.
5. Musah A, Gibson JE, Leonardi-Bee J, Cave MR, Ander EL, Bath-Hextall F. Regional variations of basal cell carcinoma incidence in the U.K. using The Health Improvement Network database (2004-10). *Br J Dermatol.* 2013;169(5):1093-9.
6. Liao W, Coupland CAC, Innes H, Jepsen P, Matthews PC, Campbell C, et al. Disparities in care and outcomes for primary liver cancer in England during 2008-2018: a cohort study of 8.52 million primary care population using the QResearch database. *EClinicalMedicine.* 2023;59:101969.
7. Rait G, Horsfall L. Twenty-year sociodemographic trends in lung cancer in non-smokers: A UK-based cohort study of 3.7 million people. *Cancer Epidemiol.* 2020;67:101771.

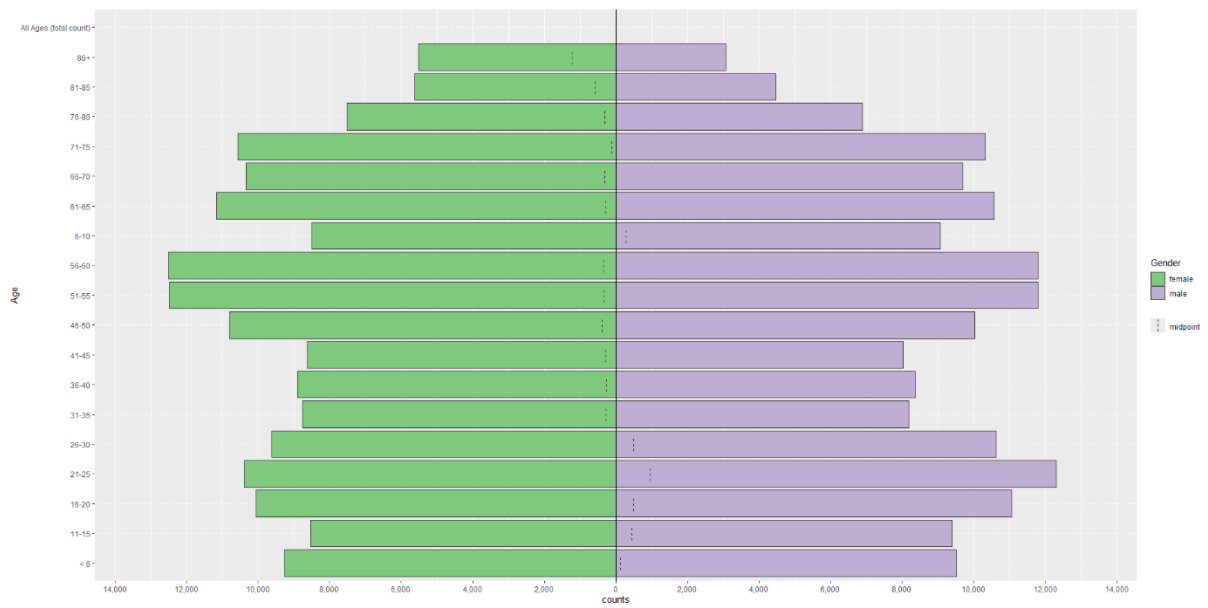

Supplementary Figure S1. Age distribution in Morecambe Bay ex CCG. This age pyramid illustrates the distribution of the population across different age groups, separated by gender. The horizontal axis represents the counts of the total population, while the vertical axis represents age groups in 5-year intervals. Purple bars (right side of the pyramid) represent the male population within each age group; green bars (left side of the pyramid) represent the female population within each age group.

## Supplementary Information S3: Cancer burden

Lung cancer contributes to the largest number of cancer deaths in the world (1) while skin cancer is the most common in the general population (2), although prostate cancer is the most common in men, and breast cancer in female (3). After lung cancer, colorectal cancer is the second highest cause of cancer deaths in the United Kingdom (4). Haematological cancers are the third largest cancer killers in the UK<sup>1</sup> and increasingly important worldwide, with 1.3 million new cases in 2020 and 700,000 deaths (5). Within the upper GI cancers, oesophageal cancer in the UK has one of the highest age-standardised rates within the oesophageal cancers world wide (6). Head and neck cancer, a diverse group of more than 30 different subsites, is the 6th most common cancer worldwide and one of the most debilitating, although it constitutes only 3% of all cancers in the UK (7). Finally, every year in the UK, more than 21 000 women (5% of all cancers) are diagnosed with a gynaecological cancer and around 8000 die<sup>2</sup> (8).

## References

1. Rait G, Horsfall L. Twenty-year sociodemographic trends in lung cancer in non-smokers: A UK-based cohort study of 3.7 million people. *Cancer Epidemiol.* 2020;67:101771.
2. Saleh GM, Desai P, Collin JR, Ives A, Jones T, Hussain B. Incidence of eyelid basal cell carcinoma in England: 2000-2010. *Br J Ophthalmol.* 2017;101(2):209-12.
3. Arnold M, Morgan E, Runggay H, Mafra A, Singh D, Laversanne M, et al. Current and future burden of breast cancer: Global statistics for 2020 and 2040. *Breast.* 2022;66:15-23.
4. Lal N, Singh HK, Majeed A, Pawa N. The impact of socioeconomic deprivation on the uptake of colorectal cancer screening in London. *J Med Screen.* 2020;969141320916206.
5. Chen L, Zheng Y, Yu K, Chen S, Wang W, Gale RP, et al. Changing causes of death in persons with haematological cancers 1975-2016. *Leukemia.* 2022;36(7):1850-60.
6. Arnold M, Abnet CC, Neale RE, Vignat J, Giovannucci EL, McGlynn KA, Bray F. Global Burden of 5 Major Types of Gastrointestinal Cancer. *Gastroenterology.* 2020;159(1):335-49 e15.
7. Taib BG, Oakley J, Dailey Y, Hodge I, Wright P, du Plessis R, et al. Socioeconomic deprivation and the burden of head and neck cancer-Regional variations of incidence and mortality in Merseyside and Cheshire, North West, England. *Clin Otolaryngol.* 2018;43(3):846-53.
8. Knapp S, Henderson L, Duncan T, Gray T. Gynaecological cancers. *InnovAiT: Education and inspiration for general practice.* 2021;14(7):449-57.

---

<sup>1</sup> <https://bloodcancer.org.uk/news/blood-cancer-facts/#>

<sup>2</sup> <https://www.macmillan.org.uk/about-us/what-we-do/research/cancer-statistics-fact-sheet#>

Supplementary Table S1: Cancer type categorization

| ICD10 Code | ICD10 Group | ICD10 Code Description                                       | TumourSite |
|------------|-------------|--------------------------------------------------------------|------------|
| C50        | C50         | Malignant neoplasm of breast                                 | Breast     |
| C500       | C50         | Malignant neoplasm of nipple and areola                      | Breast     |
| C501       | C50         | Malignant neoplasm of central portion of breast              | Breast     |
| C502       | C50         | Malignant neoplasm of upper-inner quadrant of breast         | Breast     |
| C503       | C50         | Malignant neoplasm of lower-inner quadrant of breast         | Breast     |
| C504       | C50         | Malignant neoplasm of upper-outer quadrant of breast         | Breast     |
| C505       | C50         | Malignant neoplasm of lower-outer quadrant of breast         | Breast     |
| C506       | C50         | Malignant neoplasm of axillary tail of breast                | Breast     |
| C508       | C50         | Malignant neoplasm, overlapping lesion of breast             | Breast     |
| C509       | C50         | Malignant neoplasm of breast, unspecified                    | Breast     |
| D05        | D05         | Carcinoma in situ of breast                                  | Breast     |
| D050       | D05         | Lobular carcinoma in situ                                    | Breast     |
| D051       | D05         | Intraductal carcinoma in situ                                | Breast     |
| D057       | D05         | Other carcinoma in situ of breast                            | Breast     |
| D059       | D05         | Carcinoma in situ of breast, unspecified                     | Breast     |
| C17        | C17         | Malignant neoplasm of small intestine                        | Colorectal |
| C170       | C17         | Malignant neoplasm of small intestine, duodenum              | Colorectal |
| C171       | C17         | Malignant neoplasm of small intestine, jejunum               | Colorectal |
| C172       | C17         | Malignant neoplasm of small intestine, ileum                 | Colorectal |
| C173       | C17         | Malignant neoplasm of small intestine, Meckel's diverticulum | Colorectal |
| C178       | C17         | Malignant neoplasm overlapping lesion of small intestine     | Colorectal |
| C179       | C17         | Malignant neoplasm of small intestine, unspecified           | Colorectal |
| C18        | C18         | Malignant neoplasm of colon                                  | Colorectal |
| C180       | C18         | Malignant neoplasm of caecum                                 | Colorectal |
| C181       | C18         | Malignant neoplasm of appendix                               | Colorectal |
| C182       | C18         | Malignant neoplasm of ascending colon                        | Colorectal |
| C183       | C18         | Malignant neoplasm of hepatic flexure                        | Colorectal |
| C184       | C18         | Malignant neoplasm of transverse colon                       | Colorectal |
| C185       | C18         | Malignant neoplasm of splenic flexure                        | Colorectal |
| C186       | C18         | Malignant neoplasm of descending colon                       | Colorectal |
| C187       | C18         | Malignant neoplasm of sigmoid colon                          | Colorectal |
| C188       | C18         | Malignant neoplasm overlapping lesion of colon               | Colorectal |

|      |     |                                                              |             |
|------|-----|--------------------------------------------------------------|-------------|
| C189 | C18 | Malignant neoplasm of colon, unspecified                     | Colorectal  |
| C19X | C19 | Malignant neoplasm of rectosigmoid junction                  | Colorectal  |
| C20X | C20 | Malignant neoplasm of rectum                                 | Colorectal  |
| C21  | C21 | Malignant neoplasm of anus and anal canal                    | Colorectal  |
| C210 | C21 | Malignant neoplasm of anus, unspecified                      | Colorectal  |
| C211 | C21 | Malignant neoplasm of anal canal                             | Colorectal  |
| C212 | C21 | Malignant neoplasm of cloacogenic zone                       | Colorectal  |
| C218 | C21 | Malig neo, overlapping lesion of rectum, anus and anal canal | Colorectal  |
| C26  | C26 | Malignant neoplasm of other and ill-defined digestive organs | Colorectal  |
| C260 | C26 | Malignant neoplasm of intestinal tract, part unsp            | Colorectal  |
| C261 | C26 | Malignant neoplasm of spleen                                 | Colorectal  |
| C268 | C26 | Malignant neoplasm, overlapping lesion of digestive system   | Colorectal  |
| C269 | C26 | Malignant neoplasm of ill-def sites within digestive system  | Colorectal  |
| C784 | C78 | Secondary malignant neoplasm of small intestine              | Colorectal  |
| C785 | C78 | Secondary malignant neoplasm of large intest & rectum        | Colorectal  |
| C788 | C78 | Secondary malignant neoplasm of other & unsp digestive orgs  | Colorectal  |
| C51  | C51 | Malignant neoplasm of vulva                                  | Gynaecology |
| C510 | C51 | Malignant neoplasm of labium majus                           | Gynaecology |
| C511 | C51 | Malignant neoplasm of labium minus                           | Gynaecology |
| C512 | C51 | Malignant neoplasm of clitoris                               | Gynaecology |
| C518 | C51 | Malignant neoplasm of overlapping lesion of vulva            | Gynaecology |
| C519 | C51 | Malignant neoplasm of vulva, unspecified                     | Gynaecology |
| C52X | C52 | Malignant neoplasm of vagina                                 | Gynaecology |
| C53  | C53 | Malignant neoplasm of cervix uteri                           | Gynaecology |
| C530 | C53 | Malignant neoplasm of endocervix                             | Gynaecology |
| C531 | C53 | Malignant neoplasm of exocervix                              | Gynaecology |
| C538 | C53 | Malignant neoplasm, overlapping lesion of cervix uteri       | Gynaecology |
| C539 | C53 | Malignant neoplasm of cervix uteri, unsp                     | Gynaecology |
| C54  | C54 | Malignant neoplasm of corpus uteri                           | Gynaecology |
| C540 | C54 | Malignant neoplasm of isthmus uteri                          | Gynaecology |
| C541 | C54 | Malignant neoplasm of endometrium                            | Gynaecology |
| C542 | C54 | Malignant neoplasm of myometrium                             | Gynaecology |
| C543 | C54 | Malignant neoplasm of fundus uteri                           | Gynaecology |



|      |     |                                                              |             |
|------|-----|--------------------------------------------------------------|-------------|
| C548 | C54 | Malignant neoplasm overlapping lesion of corpus uteri        | Gynaecology |
| C549 | C54 | Malignant neoplasm of corpus uteri, unsp                     | Gynaecology |
| C55X | C55 | Malignant neoplasm of uterus, part unspecified               | Gynaecology |
| C56X | C56 | Malignant neoplasm of ovary                                  | Gynaecology |
| C57  | C57 | Malignant neoplasm of other and unsp female genital orgs     | Gynaecology |
| C570 | C57 | Malignant neoplasm of fallopian tube                         | Gynaecology |
| C571 | C57 | Malignant neoplasm of broad ligament                         | Gynaecology |
| C572 | C57 | Malignant neoplasm of round ligament                         | Gynaecology |
| C573 | C57 | Malignant neoplasm of parametrium                            | Gynaecology |
| C574 | C57 | Malignant neoplasm of uterine adnexa, unsp                   | Gynaecology |
| C577 | C57 | Malignant neoplasm of other specified female genital organs  | Gynaecology |
| C578 | C57 | Malignant neoplasm, overlapping lesion female genital organs | Gynaecology |
| C579 | C57 | Malignant neoplasm of female genital organ, unspecified      | Gynaecology |
| C58X | C58 | Malignant neoplasm of placenta                               | Gynaecology |
| C796 | C79 | Secondary malignant neoplasm of ovary                        | Gynaecology |
| C81  | C81 | Hodgkin lymphoma                                             | Haematology |
| C810 | C81 | Nodular lymphocyte predominant Hodgkin lymphoma              | Haematology |
| C811 | C81 | Nodular sclerosis classical Hodgkin lymphoma                 | Haematology |
| C812 | C81 | Mixed cellularity classical Hodgkin lymphoma                 | Haematology |
| C813 | C81 | Lymphocyte depleted classical Hodgkin lymphoma               | Haematology |
| C814 | C81 | Lymphocyte-rich classical Hodgkin lymphoma                   | Haematology |
| C817 | C81 | Other classical Hodgkin lymphoma                             | Haematology |
| C819 | C81 | Hodgkin lymphoma, unspecified                                | Haematology |
| C82  | C82 | Follicular lymphoma                                          | Haematology |
| C820 | C82 | Follicular lymphoma grade I                                  | Haematology |
| C821 | C82 | Follicular lymphoma grade II                                 | Haematology |
| C822 | C82 | Follicular lymphoma grade III, unspecified                   | Haematology |
| C823 | C82 | Follicular lymphoma grade IIIa                               | Haematology |
| C824 | C82 | Follicular lymphoma grade IIIb                               | Haematology |
| C825 | C82 | Diffuse follicle centre lymphoma                             | Haematology |
| C826 | C82 | Cutaneous follicle centre lymphoma                           | Haematology |
| C827 | C82 | Other types of follicular lymphoma                           | Haematology |
| C829 | C82 | Follicular lymphoma, unspecified                             | Haematology |

|      |     |                                                              |             |
|------|-----|--------------------------------------------------------------|-------------|
| C83  | C83 | Non-follicular lymphoma                                      | Haematology |
| C830 | C83 | Small cell B-cell lymphoma                                   | Haematology |
| C831 | C83 | Mantle cell lymphoma                                         | Haematology |
| C832 | C83 | Diffuse non-Hodgkin mixed sml & lge cell (diffuse) lymphoma  | Haematology |
| C833 | C83 | Diffuse large B-cell lymphoma                                | Haematology |
| C834 | C83 | Diffuse non-Hodgkin's immunoblastic (diffuse) lymphoma       | Haematology |
| C835 | C83 | Lymphoblastic (diffuse) lymphoma                             | Haematology |
| C836 | C83 | Diffuse non-Hodgkin's lymphoma undifferentiated (diffuse)    | Haematology |
| C837 | C83 | Burkitt lymphoma                                             | Haematology |
| C838 | C83 | Other non-follicular lymphoma                                | Haematology |
| C839 | C83 | Non-follicular (diffuse) lymphoma, unspecified               | Haematology |
| C84  | C84 | Mature T/NK-cell lymphomas                                   | Haematology |
| C840 | C84 | Peripheral and cutaneous T-cell lymphomas, mycosis fungoides | Haematology |
| C841 | C84 | SezÚry disease                                               | Haematology |
| C842 | C84 | Peripheral and cutaneous T-cell lymphomas, T-zone lymphoma   | Haematology |
| C843 | C84 | Periph & cutan T-cell lymphomas, lymphoepithelioid lymphoma  | Haematology |
| C844 | C84 | Peripheral T-cell lymphoma, not elsewhere classified         | Haematology |
| C845 | C84 | Other mature T/NK-cell lymphomas                             | Haematology |
| C846 | C84 | Anaplastic large cell lymphoma, ALK-positive                 | Haematology |
| C847 | C84 | Anaplastic large cell lymphoma, ALK-negative                 | Haematology |
| C848 | C84 | Cutaneous T-cell lymphoma, unspecified                       | Haematology |
| C849 | C84 | Mature T/NK-cell lymphoma, unspecified                       | Haematology |
| C85  | C85 | Other and unspecified types of non-Hodgkin lymphoma          | Haematology |
| C850 | C85 | Oth & unsp types of non-Hodgkin lymphoma, lymphosarcoma      | Haematology |
| C851 | C85 | Oth & unsp types non-Hodgkin B-cell lymphoma, unsp           | Haematology |
| C852 | C85 | Mediastinal (thymic) large B-cell lymphoma                   | Haematology |
| C857 | C85 | Other specified types of non-Hodgkin lymphoma                | Haematology |
| C859 | C85 | Non-Hodgkin lymphoma, unspecified                            | Haematology |
| C86  | C86 | Other specified types of T/NK-cell lymphoma                  | Haematology |
| C860 | C86 | Extranodal NK/T-cell lymphoma, nasal type                    | Haematology |
| C861 | C86 | Hepatosplenic T-cell lymphoma                                | Haematology |
| C862 | C86 | Enteropathy-type (intestinal) T-cell lymphoma                | Haematology |
| C863 | C86 | Subcutaneous panniculitis-like T-cell lymphoma               | Haematology |

|      |     |                                                                                               |             |
|------|-----|-----------------------------------------------------------------------------------------------|-------------|
| C864 | C86 | Blastic NK-cell lymphoma                                                                      | Haematology |
| C865 | C86 | Angioimmunoblastic T-cell lymphoma                                                            | Haematology |
| C866 | C86 | Primary cutaneous CD30-positive T-cell proliferations                                         | Haematology |
| C88  | C88 | Malignant immunoproliferative diseases                                                        | Haematology |
| C880 | C88 | Waldenstrom macroglobulinaemia                                                                | Haematology |
| C881 | C88 | Alpha heavy chain disease                                                                     | Haematology |
| C882 | C88 | Other heavy chain disease                                                                     | Haematology |
| C883 | C88 | Malignant immunoproliferative small intestinal disease                                        | Haematology |
| C884 | C88 | Extranodal marginal zone B-cell lymphoma of mucosa-associated lymphoid tissue [MALT-lymphoma] | Haematology |
| C887 | C88 | Other malignant immunoproliferative diseases                                                  | Haematology |
| C889 | C88 | Malignant immunoproliferative disease, unspecified                                            | Haematology |
| C90  | C90 | Multiple myeloma and malignant plasma cell neoplasms                                          | Haematology |
| C900 | C90 | Multiple myeloma                                                                              | Haematology |
| C901 | C90 | Plasma cell leukaemia                                                                         | Haematology |
| C902 | C90 | Extramedullary plasmacytoma                                                                   | Haematology |
| C903 | C90 | Solitary plasmacytoma                                                                         | Haematology |
| C91  | C91 | Lymphoid leukaemia                                                                            | Haematology |
| C910 | C91 | Acute lymphoblastic leukaemia [ALL]                                                           | Haematology |
| C911 | C91 | Chronic lymphocytic leukaemia of B-cell type                                                  | Haematology |
| C912 | C91 | Subacute lymphocytic leukaemia                                                                | Haematology |
| C913 | C91 | Prolymphocytic leukaemia of B-cell type                                                       | Haematology |
| C914 | C91 | Hairy-cell leukaemia                                                                          | Haematology |
| C915 | C91 | Adult T-cell lymphoma/leukaemia (HTLV-1-associated)                                           | Haematology |
| C916 | C91 | Prolymphocytic leukaemia of T-cell type                                                       | Haematology |
| C917 | C91 | Other lymphoid leukaemia                                                                      | Haematology |
| C918 | C91 | Mature B-cell leukaemia Burkitt-type                                                          | Haematology |
| C919 | C91 | Lymphoid leukaemia, unspecified                                                               | Haematology |
| C92  | C92 | Myeloid leukaemia                                                                             | Haematology |
| C920 | C92 | Acute myeloblastic leukaemia [AML]                                                            | Haematology |
| C921 | C92 | Chronic myeloid leukaemia [CML], BCR/ABL-positive                                             | Haematology |
| C922 | C92 | Atypical chronic myeloid leukaemia, BCR/ABL-negative                                          | Haematology |
| C923 | C92 | Myeloid sarcoma                                                                               | Haematology |
| C924 | C92 | Acute promyelocytic leukaemia [PML]                                                           | Haematology |

|      |     |                                                                                                   |             |
|------|-----|---------------------------------------------------------------------------------------------------|-------------|
| C925 | C92 | Acute myelomonocytic leukaemia                                                                    | Haematology |
| C926 | C92 | Acute myeloid leukaemia with 11q23-abnormality                                                    | Haematology |
| C927 | C92 | Other myeloid leukaemia                                                                           | Haematology |
| C928 | C92 | Acute myeloid leukaemia with multilineage dysplasia                                               | Haematology |
| C929 | C92 | Myeloid leukaemia, unspecified                                                                    | Haematology |
| C93  | C93 | Monocytic leukaemia                                                                               | Haematology |
| C930 | C93 | Acute monoblastic/monocytic leukaemia                                                             | Haematology |
| C931 | C93 | Chronic myelomonocytic leukaemia                                                                  | Haematology |
| C932 | C93 | Subacute monocytic leukaemia                                                                      | Haematology |
| C933 | C93 | Juvenile myelomonocytic leukaemia                                                                 | Haematology |
| C937 | C93 | Other monocytic leukaemia                                                                         | Haematology |
| C939 | C93 | Monocytic leukaemia, unspecified                                                                  | Haematology |
| C94  | C94 | Other leukaemias of specified cell type                                                           | Haematology |
| C940 | C94 | Acute erythroid leukaemia                                                                         | Haematology |
| C941 | C94 | Chronic erythraemia                                                                               | Haematology |
| C942 | C94 | Acute megakaryoblastic leukaemia                                                                  | Haematology |
| C943 | C94 | Mast cell leukaemia                                                                               | Haematology |
| C944 | C94 | Acute panmyelosis with myelofibrosis                                                              | Haematology |
| C945 | C94 | Acute myelofibrosis                                                                               | Haematology |
| C946 | C94 | Myelodysplastic and myeloproliferative disease, not elsewhere classified                          | Haematology |
| C947 | C94 | Other specified leukaemias                                                                        | Haematology |
| C95  | C95 | Leukaemia of unspecified cell type                                                                | Haematology |
| C950 | C95 | Acute leukaemia of unsp cell type                                                                 | Haematology |
| C951 | C95 | Chronic leukaemia unsp cell type                                                                  | Haematology |
| C952 | C95 | Subacute leukaemia unsp cell type                                                                 | Haematology |
| C957 | C95 | Other leukaemia unspecified cell type                                                             | Haematology |
| C959 | C95 | Leukaemia, unspecified                                                                            | Haematology |
| C96  | C96 | Oth & unspec malign neop lymphoid, haematopoietic & rel tiss                                      | Haematology |
| C960 | C96 | Multifocal and multisystemic (disseminated) Langerhans-cell histiocytosis [Letterer-Siwe disease] | Haematology |
| C961 | C96 | Malignant histiocytosis                                                                           | Haematology |
| C962 | C96 | Malignant mast cell tumour                                                                        | Haematology |
| C963 | C96 | True histiocytic lymphoma                                                                         | Haematology |
| C964 | C96 | Sarcoma of dendritic cells (accessory cells)                                                      | Haematology |

|      |     |                                                              |               |
|------|-----|--------------------------------------------------------------|---------------|
| C965 | C96 | Multifocal and unisystemic Langerhans-cell histiocytosis     | Haematology   |
| C966 | C96 | Unifocal Langerhans-cell histiocytosis                       | Haematology   |
| C967 | C96 | Oth spec malig neop lymphoid h'poietic & related tissue      | Haematology   |
| C968 | C96 | Histiocytic sarcoma                                          | Haematology   |
| C969 | C96 | Malig neop lymphoid haematopoietic and related tissue unspec | Haematology   |
| C00  | C00 | Malignant neoplasm of lip                                    | Head and Neck |
| C000 | C00 | Malignant neoplasm of external upper lip                     | Head and Neck |
| C001 | C00 | Malignant neoplasm of external lower lip                     | Head and Neck |
| C002 | C00 | Malignant neoplasm of external lip, unspecified              | Head and Neck |
| C003 | C00 | Malignant neoplasm of upper lip, inner aspect                | Head and Neck |
| C004 | C00 | Malignant neoplasm of lower lip, inner aspect                | Head and Neck |
| C005 | C00 | Malignant neoplasm of lip, unspecified, inner aspect         | Head and Neck |
| C006 | C00 | Malignant neoplasm of commissure of lip                      | Head and Neck |
| C008 | C00 | Malignant neoplasm of overlapping lesion of lip              | Head and Neck |
| C009 | C00 | Malignant neoplasm of lip, unspecified                       | Head and Neck |
| C01X | C01 | Malignant neoplasm of base of tongue                         | Head and Neck |
| C02  | C02 | Malignant neoplasm of other and unspecified parts of tongue  | Head and Neck |
| C020 | C02 | Malignant neoplasm of dorsal surface tongue                  | Head and Neck |
| C021 | C02 | Malignant neoplasm of border of tongue                       | Head and Neck |
| C022 | C02 | Malignant neoplasm of ventral surface of tongue              | Head and Neck |
| C023 | C02 | Malignant neo of anterior two-thirds of tongue, part uns     | Head and Neck |
| C024 | C02 | Malignant neoplasm of lingual tonsil                         | Head and Neck |
| C028 | C02 | Malignant neoplasm of overlapping lesion of tongue           | Head and Neck |
| C029 | C02 | Malignant neoplasm of tongue, unspecified                    | Head and Neck |
| C03  | C03 | Malignant neoplasm of gum                                    | Head and Neck |
| C030 | C03 | Malignant neoplasm of upper gum                              | Head and Neck |
| C031 | C03 | Malignant neoplasm of lower gum                              | Head and Neck |
| C039 | C03 | Malignant neoplasm of gum unspecified                        | Head and Neck |
| C04  | C04 | Malignant neoplasm of floor of mouth                         | Head and Neck |
| C040 | C04 | Malignant neoplasm of floor of anterior floor of mouth       | Head and Neck |
| C041 | C04 | Malignant neoplasm of lateral floor of mouth                 | Head and Neck |
| C048 | C04 | Malignant neoplasm, overlapping lesion of floor of mouth     | Head and Neck |
| C049 | C04 | Malignant neoplasm of floor of mouth, floor of mouth, unspec | Head and Neck |

|      |     |                                                             |               |
|------|-----|-------------------------------------------------------------|---------------|
| C05  | C05 | Malignant neoplasm of palate                                | Head and Neck |
| C050 | C05 | Malignant neoplasm of hard palate                           | Head and Neck |
| C051 | C05 | Malignant neoplasm of soft palate                           | Head and Neck |
| C052 | C05 | Malignant neoplasm of uvula                                 | Head and Neck |
| C058 | C05 | Malignant neoplasm, overlapping lesion of palate            | Head and Neck |
| C059 | C05 | Malignant neoplasm of palate, unspecified                   | Head and Neck |
| C06  | C06 | Malignant neoplasm of other and unspecified parts of mouth  | Head and Neck |
| C060 | C06 | Malignant neoplasm cheek mucosa                             | Head and Neck |
| C061 | C06 | Malignant neoplasm of vestibule of mouth                    | Head and Neck |
| C062 | C06 | Malignant neoplasm of retromolar area                       | Head and Neck |
| C068 | C06 | Malignant neoplasm, overlap les of oth & unsp part of mouth | Head and Neck |
| C069 | C06 | Malignant neoplasm of part of mouth, unspecified            | Head and Neck |
| C07X | C07 | Malignant neoplasm of parotid gland                         | Head and Neck |
| C08  | C08 | Maligt neoplasm of oth and unspec major saliv glands        | Head and Neck |
| C080 | C08 | Malignant neoplasm of submandibular gland                   | Head and Neck |
| C081 | C08 | Malignant neoplasm of sublingual gland                      | Head and Neck |
| C088 | C08 | Malignant neoplasm, overlapping lesion of major saliv gland | Head and Neck |
| C089 | C08 | Malignant neoplasm of major salivary gland, unspecified     | Head and Neck |
| C09  | C09 | Malignant neoplasm of tonsil                                | Head and Neck |
| C090 | C09 | Malignant neoplasm tonsillar fossa                          | Head and Neck |
| C091 | C09 | Malig neo of tonsillar pillar (anterior)(posterior)         | Head and Neck |
| C098 | C09 | Malignant neoplasm of overlapping lesion of tonsil          | Head and Neck |
| C099 | C09 | Malignant neoplasm of tonsil unspecified                    | Head and Neck |
| C10  | C10 | Malignant neoplasm of oropharynx                            | Head and Neck |
| C100 | C10 | Malignant neoplasm of vallecula                             | Head and Neck |
| C101 | C10 | Malignant neoplasm of anterior surface of epiglottis        | Head and Neck |
| C102 | C10 | Malignant neoplasm of lateral wall of oropharynx            | Head and Neck |
| C103 | C10 | Malignant neoplasm of posterior wall of oropharynx          | Head and Neck |
| C104 | C10 | Malignant neoplasm of branchial cleft                       | Head and Neck |
| C108 | C10 | Malignant neoplasm overlapping lesion of oropharynx         | Head and Neck |
| C109 | C10 | Malignant neoplasm of oropharynx unspecified                | Head and Neck |
| C11  | C11 | Malignant neoplasm of nasopharynx                           | Head and Neck |
| C110 | C11 | Malignant neoplasm of superior wall of nasopharynx          | Head and Neck |

|       |     |                                                             |               |
|-------|-----|-------------------------------------------------------------|---------------|
| C111  | C11 | Malignant neoplasm of posterior wall of nasopharynx         | Head and Neck |
| C112  | C11 | Malignant neoplasm of lateral wall of nasopharynx           | Head and Neck |
| C113  | C11 | Malignant neoplasm of anterior wall of nasopharynx          | Head and Neck |
| C118  | C11 | Malignant neoplasm overlapping lesion of nasopharynx        | Head and Neck |
| C119  | C11 | Malignant neoplasm of nasopharynx unspecified               | Head and Neck |
| C12X  | C12 | Malignant neoplasm of pyriform sinus                        | Head and Neck |
| C13   | C13 | Malignant neoplasm of hypopharynx                           | Head and Neck |
| C130  | C13 | Malignant neoplasm of hypopharynx, postcricoid region       | Head and Neck |
| C131  | C13 | Malig neoplasm aryepiglottic fold, hypopharyngeal aspect    | Head and Neck |
| C132  | C13 | Malignant neoplasm posterior wall of hypopharynx            | Head and Neck |
| C138  | C13 | Malignant neoplasm overlapping lesion of hypopharynx        | Head and Neck |
| C139  | C13 | Malignant neoplasm of hypopharynx unspecified               | Head and Neck |
| C14   | C14 | Mal neo oth ill-def sites lip/oral cavity/pharynx           | Head and Neck |
| C140  | C14 | Malignant neoplasm of pharynx, unsp                         | Head and Neck |
| C142  | C14 | Malignant neoplasm of Waldeyer's ring                       | Head and Neck |
| C148  | C14 | Malig neo, overlapping lesion of lip, oral cavity & pharynx | Head and Neck |
| C30   | C30 | Malignant neoplasm of nasal cavity and middle ear           | Head and Neck |
| C300  | C30 | Malignant neoplasm of nasal cavity                          | Head and Neck |
| C301  | C30 | Malignant neoplasm of middle ear                            | Head and Neck |
| C31   | C31 | Malignant neoplasm of accessory sinuses                     | Head and Neck |
| C310  | C31 | Malignant neoplasm of maxillary sinus                       | Head and Neck |
| C311  | C31 | Malignant neoplasm of ethmoidal sinus                       | Head and Neck |
| C312  | C31 | Malignant neoplasm of frontal sinus                         | Head and Neck |
| C313  | C31 | Malignant neoplasm of sphenoidal sinus                      | Head and Neck |
| C318  | C31 | Malignant neoplasm, overlapping lesion accessory sinuses    | Head and Neck |
| C319  | C31 | Malignant neoplasm of accessory sinus, unsp                 | Head and Neck |
| C32   | C32 | Malignant neoplasm of larynx                                | Head and Neck |
| C320  | C32 | Malignant neoplasm of glottis                               | Head and Neck |
| C320A | C32 | Vocal cords, true                                           | Head and Neck |
| C320B | C32 | Anterior commissure                                         | Head and Neck |
| C320C | C32 | Posterior commissure                                        | Head and Neck |
| C321  | C32 | Malignant neoplasm of supraglottis                          | Head and Neck |
| C321A | C32 | Suprahyoid epiglottis (tip, laryngeal surface)              | Head and Neck |

|       |     |                                                               |               |
|-------|-----|---------------------------------------------------------------|---------------|
| C321B | C32 | Aryepiglottic fold, laryngeal aspect                          | Head and Neck |
| C321C | C32 | Arytenoid                                                     | Head and Neck |
| C321D | C32 | Infrahyoid epiglottis                                         | Head and Neck |
| C321E | C32 | False cords                                                   | Head and Neck |
| C322  | C32 | Malignant neoplasm of subglottis                              | Head and Neck |
| C323  | C32 | Malignant neoplasm of laryngeal cartilage                     | Head and Neck |
| C323A | C32 | Arytenoid cartilage                                           | Head and Neck |
| C323B | C32 | Cricoid cartilage                                             | Head and Neck |
| C323C | C32 | Thyroid cartilage                                             | Head and Neck |
| C328  | C32 | Malignant neoplasm, overlapping lesion of larynx              | Head and Neck |
| C329  | C32 | Malignant neoplasm of larynx, unspecified                     | Head and Neck |
| C73X  | C73 | Malignant neoplasm of thyroid gland                           | Head and Neck |
| C770  | C77 | Sec & uns malig neoplasm of lymph nodes of head, face & neck  | Head and Neck |
| C339A | C33 | Tracheal stoma                                                | Lung          |
| C33X  | C33 | Malignant neoplasm of trachea                                 | Lung          |
| C34   | C34 | Malignant neoplasm of bronchus and lung                       | Lung          |
| C340  | C34 | Malignant neoplasm of main bronchus                           | Lung          |
| C341  | C34 | Malignant neoplasm of upper lobe, bronchus or lung            | Lung          |
| C342  | C34 | Malignant neoplasm of middle lobe, bronchus or lung           | Lung          |
| C343  | C34 | Malignant neoplasm of lower lobe, bronchus or lung            | Lung          |
| C348  | C34 | Malignant neoplasm of overlap les of bronchus & lung          | Lung          |
| C349  | C34 | Malignant neoplasm of bronchus or lung, unspec                | Lung          |
| C37X  | C37 | Malignant neoplasm of thymus                                  | Lung          |
| C38   | C38 | Malignant neoplasm of heart, mediastinum and pleura           | Lung          |
| C380  | C38 | Malignant neoplasm of heart, mediastinum & pleura, heart      | Lung          |
| C381  | C38 | Malignant neoplasm of anterior mediastinum                    | Lung          |
| C382  | C38 | Malignant neoplasm of posterior mediastinum                   | Lung          |
| C383  | C38 | Malig neo heart, mediastinum & pleura,mediastinum,part unsp   | Lung          |
| C384  | C38 | Malignant neoplasm of pleura                                  | Lung          |
| C388  | C38 | Malig neo, overlapping lesion of heart, mediastinum & pleura  | Lung          |
| C39   | C39 | Malig neo oth + ill-def sites resp sys + intrathorac orgs     | Lung          |
| C390  | C39 | Malignant neoplasm of upper respiratory tract, part unsp      | Lung          |
| C398  | C39 | Malignant neoplasm, overlap lesion of resp & intrathorac orgs | Lung          |



|      |     |                                                              |      |
|------|-----|--------------------------------------------------------------|------|
| C399 | C39 | Malignant neoplasm of ill-def sites within the resp sys      | Lung |
| C45  | C45 | Mesothelioma                                                 | Lung |
| C450 | C45 | Mesothelioma of pleura                                       | Lung |
| C451 | C45 | Mesothelioma of peritoneum                                   | Lung |
| C452 | C45 | Mesothelioma of pericardium                                  | Lung |
| C457 | C45 | Mesothelioma of other sites                                  | Lung |
| C459 | C45 | Mesothelioma, unspecified                                    | Lung |
| C78  | C78 | Sec malignant neoplasm of respiratory and digestive organs   | Lung |
| C780 | C78 | Secondary malignant neoplasm of lung                         | Lung |
| C781 | C78 | Secondary malignant neoplasm of mediastinum                  | Lung |
| C782 | C78 | Secondary malignant neoplasm of pleura                       | Lung |
| C783 | C78 | Secondary malignant neoplasm of oth & unsp respiratory orgs  | Lung |
| C43  | C43 | Malignant melanoma of skin                                   | Skin |
| C430 | C43 | Malignant melanoma of lip                                    | Skin |
| C431 | C43 | Malignant melanoma of eyelid, including canthus              | Skin |
| C432 | C43 | Malignant melanoma of ear and ext auricular canal            | Skin |
| C433 | C43 | Malignant melanoma of other and unspecified parts of face    | Skin |
| C434 | C43 | Malignant melanoma of scalp and neck                         | Skin |
| C435 | C43 | Malignant melanoma of trunk                                  | Skin |
| C436 | C43 | Malignant melanoma of upper limb, including shoulder         | Skin |
| C437 | C43 | Malignant melanoma of lower limb, including hip              | Skin |
| C438 | C43 | Malignant melanoma of skin                                   | Skin |
| C439 | C43 | Malignant melanoma of skin, unsp                             | Skin |
| C44  | C44 | Other malignant neoplasms of skin                            | Skin |
| C440 | C44 | Other malignant neoplasms of skin of lip                     | Skin |
| C441 | C44 | Other malignant neoplasms of skin of eyelid, incl canthus    | Skin |
| C442 | C44 | Oth malignant neoplasms of skin of ear & ext auricular canal | Skin |
| C443 | C44 | Oth malignant neoplasm of skin of oth & unsp parts of face   | Skin |
| C444 | C44 | Other malignant neoplasms of skin of scalp and neck          | Skin |
| C445 | C44 | Other malignant neoplasms of skin of trunk                   | Skin |
| C446 | C44 | Oth malignant neoplasms of skin of upper limb, incl shoulder | Skin |
| C447 | C44 | Other malignant neoplasms of skin of lower limb, incl hip    | Skin |
| C448 | C44 | Other malignant neoplasms, overlapping lesion of skin        | Skin |

|      |     |                                                          |          |
|------|-----|----------------------------------------------------------|----------|
| C449 | C44 | Other malignant neoplasms of skin, unspecified           | Skin     |
| C792 | C79 | Secondary malignant neoplasm of skin                     | Skin     |
| C15  | C15 | Malignant neoplasm of oesophagus                         | Upper GI |
| C150 | C15 | Malignant neoplasm of cervical part of oesophagus        | Upper GI |
| C151 | C15 | Malignant neoplasm of thoracic part of oesophagus        | Upper GI |
| C152 | C15 | Malignant neo of abdominal part of oesophagus            | Upper GI |
| C153 | C15 | Malignant neoplasm of upper third of oesophagus          | Upper GI |
| C154 | C15 | Malignant neoplasm of middle third of oesophagus         | Upper GI |
| C155 | C15 | Malignant neoplasm of lower third of oesophagus          | Upper GI |
| C158 | C15 | Malignant neoplasm overlapping lesion of oesophagus      | Upper GI |
| C159 | C15 | Malignant neoplasm of oesophagus unspecified             | Upper GI |
| C16  | C16 | Malignant neoplasm of stomach                            | Upper GI |
| C160 | C16 | Malignant neoplasm of cardia of stomach                  | Upper GI |
| C161 | C16 | Malignant neoplasm of fundus of stomach                  | Upper GI |
| C162 | C16 | Malignant neoplasm of body of stomach                    | Upper GI |
| C163 | C16 | Malignant neoplasm of pyloric antrum                     | Upper GI |
| C164 | C16 | Malignant neoplasm of pylorus                            | Upper GI |
| C165 | C16 | Malignant neoplasm of lesser curvature of stomach, unsp  | Upper GI |
| C166 | C16 | Malignant neoplasm of greater curvature of stomach, unsp | Upper GI |
| C168 | C16 | Malignant neoplasm overlapping lesion of stomach         | Upper GI |
| C169 | C16 | Malignant neoplasm of stomach, unspecified               | Upper GI |
| C22  | C22 | Malignant neoplasm of liver and intrahepatic bile ducts  | Upper GI |
| C220 | C22 | Malignant neoplasm, liver cell carcinoma                 | Upper GI |
| C221 | C22 | Malignant neoplasm, intrahep bile duct carcinoma         | Upper GI |
| C222 | C22 | Malignant neoplasm, hepatoblastoma                       | Upper GI |
| C223 | C22 | Malignant neoplasm, angiosarcoma of liver                | Upper GI |
| C224 | C22 | Malignant neoplasm, other sarcomas of liver              | Upper GI |
| C227 | C22 | Malignant neoplasm, oth spec carcinomas of liver         | Upper GI |
| C229 | C22 | Malignant neoplasm, liver, unspecified                   | Upper GI |
| C23X | C23 | Malignant neoplasm of gallbladder                        | Upper GI |
| C24  | C24 | Maligt neoplasm of other and unspec parts biliary tract  | Upper GI |
| C240 | C24 | Malignant neoplasm of extrahepatic bile duct             | Upper GI |
| C241 | C24 | Malignant neoplasm of Ampulla of Vater                   | Upper GI |

|      |     |                                                                  |          |
|------|-----|------------------------------------------------------------------|----------|
| C248 | C24 | Malignant neoplasm overlapping lesion of biliary tract           | Upper GI |
| C249 | C24 | Malignant neoplasm of biliary tract, unspecified                 | Upper GI |
| C25  | C25 | Malignant neoplasm of pancreas                                   | Upper GI |
| C250 | C25 | Malignant neoplasm of head of pancreas                           | Upper GI |
| C251 | C25 | Malignant neoplasm of body of pancreas                           | Upper GI |
| C252 | C25 | Malignant neoplasm of tail of pancreas                           | Upper GI |
| C253 | C25 | Malignant neoplasm of pancreatic duct                            | Upper GI |
| C254 | C25 | Malignant neoplasm of endocrine pancreas                         | Upper GI |
| C257 | C25 | Malignant neoplasm of other parts of pancreas                    | Upper GI |
| C258 | C25 | Malignant neoplasm, overlapping lesion of pancreas               | Upper GI |
| C259 | C25 | Malignant neoplasm of pancreas, unspecified                      | Upper GI |
| C787 | C78 | Secondary malignant neoplasm of liver and intrahepatic bile duct | Upper GI |
| C60  | C60 | Malignant neoplasm of penis                                      | Urology  |
| C600 | C60 | Malignant neoplasm of prepuce                                    | Urology  |
| C601 | C60 | Malignant neoplasm of glans penis                                | Urology  |
| C602 | C60 | Malignant neoplasm of body of penis                              | Urology  |
| C608 | C60 | Malignant neoplasm, overlapping lesion of penis                  | Urology  |
| C609 | C60 | Malignant neoplasm of penis, unspecified                         | Urology  |
| C61X | C61 | Malignant neoplasm of prostate                                   | Urology  |
| C62  | C62 | Malignant neoplasm of testis                                     | Urology  |
| C620 | C62 | Malignant neoplasm of undescended testis                         | Urology  |
| C621 | C62 | Malignant neoplasm of descended testis                           | Urology  |
| C629 | C62 | Malignant neoplasm of testis, unspecified                        | Urology  |
| C63  | C63 | Malignant neoplasm of other and unspec male genital organs       | Urology  |
| C630 | C63 | Malignant neoplasm of epididymis                                 | Urology  |
| C631 | C63 | Malignant neoplasm of spermatic cord                             | Urology  |
| C632 | C63 | Malignant neoplasm of scrotum                                    | Urology  |
| C637 | C63 | Malignant neoplasm of other specified male genital orgs          | Urology  |
| C638 | C63 | Malignant neoplasm, overlapping lesion male genital orgs         | Urology  |
| C639 | C63 | Malignant neoplasm of male genital organ, unspecified            | Urology  |
| C64X | C64 | Malignant neoplasm of kidney, except renal pelvis                | Urology  |
| C65X | C65 | Malignant neoplasm of renal pelvis                               | Urology  |
| C66X | C66 | Malignant neoplasm of ureter                                     | Urology  |

|      |     |                                                            |         |
|------|-----|------------------------------------------------------------|---------|
| C67  | C67 | Malignant neoplasm of bladder                              | Urology |
| C670 | C67 | Malignant neoplasm of trigone of bladder                   | Urology |
| C671 | C67 | Malignant neoplasm of dome of bladder                      | Urology |
| C672 | C67 | Malignant neoplasm of lateral wall of bladder              | Urology |
| C673 | C67 | Malignant neoplasm of anterior wall of bladder             | Urology |
| C674 | C67 | Malignant neoplasm of posterior wall of bladder            | Urology |
| C675 | C67 | Malignant neoplasm of bladder neck                         | Urology |
| C676 | C67 | Malignant neoplasm of ureteric orifice                     | Urology |
| C677 | C67 | Malignant neoplasm of urachus                              | Urology |
| C678 | C67 | Malignant neoplasm, overlapping lesion of bladder          | Urology |
| C679 | C67 | Malignant neoplasm of bladder, unspecified                 | Urology |
| C68  | C68 | Malignant neoplasm of other and unspecified urinary organs | Urology |
| C680 | C68 | Malignant neoplasm of urethra                              | Urology |
| C681 | C68 | Malignant neoplasm of paraurethral gland                   | Urology |
| C688 | C68 | Malignant neoplasm of overlapping lesion urinary organs    | Urology |
| C689 | C68 | Malignant neoplasm of urinary organ, unspecified           | Urology |
| C790 | C79 | Secondary malignant neoplasm of kidney & renal pelvis      | Urology |
| C791 | C79 | Secondary malignant neoplasm of oth & uns urinary organs   | Urology |

Supplementary Table S2. Censoring correction by cancer type. The preliminary adjustment reduced the number of censored records (one record containing the number of diagnoses for a cancer type in a postcode sector during a 6 months period) to up 86% (for cancer type 'others' not considered in this study). Head and neck cancer censored records reduced by 84% (from 366 censored records to only 57), but breast and colorectal of less than 25%.

| Cancer        | N. of records | Censored records (%) | Censored records after correction (%) | Mean number of diagnoses for uncensored records | Mean number of diagnoses for uncensored records after correction | % records with censored values between 1 and 2 | % records with censored values between 1 and 3 | % records with censored values between 1 and 4 | % records with censored values between 1 and 5 | Sum of diagnoses from uncensored records before correction | Sum of diagnoses from uncensored records after correction | Number of censored records after correction |
|---------------|---------------|----------------------|---------------------------------------|-------------------------------------------------|------------------------------------------------------------------|------------------------------------------------|------------------------------------------------|------------------------------------------------|------------------------------------------------|------------------------------------------------------------|-----------------------------------------------------------|---------------------------------------------|
| Brain/CNS     | 7             | 100                  | 100                                   | NA                                              | NA                                                               | 0                                              | 0                                              | 0                                              | 100                                            | 0                                                          | 0                                                         | 7                                           |
| Breast        | 606           | 81.35                | 77.72                                 | 7.77                                            | 6.67                                                             | 45.54                                          | 21.29                                          | 2.97                                           | 7.92                                           | 878                                                        | 900                                                       | 471                                         |
| Colorectal    | 588           | 92.18                | 85.71                                 | 6.93                                            | 4.25                                                             | 59.52                                          | 19.22                                          | 0                                              | 6.97                                           | 319                                                        | 357                                                       | 504                                         |
| Gynaecology   | 406           | 99.51                | 43.84                                 | 6                                               | 1.04                                                             | 37.19                                          | 0                                              | 0                                              | 6.65                                           | 12                                                         | 238                                                       | 178                                         |
| Haematology   | 479           | 97.49                | 62.84                                 | 6.58                                            | 1.38                                                             | 55.53                                          | 0.42                                           | 0                                              | 6.89                                           | 79                                                         | 245                                                       | 301                                         |
| Head and Neck | 366           | 100                  | 15.57                                 | NA                                              | 1                                                                | 8.2                                            | 0                                              | 0                                              | 7.38                                           | 0                                                          | 309                                                       | 57                                          |
| Lung          | 531           | 88.14                | 66.1                                  | 7.25                                            | 3.19                                                             | 35.4                                           | 21.66                                          | 0.38                                           | 8.66                                           | 457                                                        | 574                                                       | 351                                         |
| Other         | 266           | 99.62                | 13.91                                 | 6                                               | 1.02                                                             | 1.88                                           | 0                                              | 0                                              | 12.03                                          | 6                                                          | 234                                                       | 37                                          |
| Sarcoma       | 54            | 100                  | 100                                   | NA                                              | NA                                                               | 0                                              | 0                                              | 0                                              | 100                                            | 0                                                          | 0                                                         | 54                                          |
| Skin          | 669           | 50.82                | 45.59                                 | 11.66                                           | 10.7                                                             | 17.19                                          | 16.14                                          | 4.93                                           | 7.32                                           | 3837                                                       | 3893                                                      | 305                                         |
| Upper GI      | 498           | 98.19                | 64.66                                 | 6.33                                            | 1.27                                                             | 46.79                                          | 8.03                                           | 0                                              | 9.84                                           | 57                                                         | 224                                                       | 322                                         |
| Urology       | 640           | 75.62                | 74.69                                 | 7.73                                            | 7.49                                                             | 42.97                                          | 22.34                                          | 3.91                                           | 5.47                                           | 1206                                                       | 1214                                                      | 478                                         |

## Supplementary Information S4: Censoring reduction

The postcode sector and Local Authority district count data used here, of cancer new diagnosis by type, were censored, with values less than or equal to 5 replaced by the words 'less than or equal to 5'. However, because zero was not included in the censoring, it was more appropriate to describe the censoring as interval censoring, with the censored values being larger than 0 and smaller than 6 (1). This means that the dataset contains nonignorable or 'missing not random' values (2). In other words, the missing data isn't just randomly scattered throughout the dataset, but instead, there's a pattern.

Before any statistical analyses started, the number of censored data was reduced by combining the Local Authority (LA) with the postcode sector (PS) data. The following rules were used (for each cancer type and time period):

- a) if within an LA (containing multiple PS) only one PS was censored, then the number of patients in the censored PS was obtained by the difference of the number of diagnosis in the LA minus the sum of patients in the non-censored PS belonging to that LA;
- b) if the number of diagnosis in the LA (or the residual number of diagnosis after deducting diagnosis from non-censored PS) was equal to the number of censored PS, then each censored PS was associated with one diagnosis;
- c) if the number of diagnosis in the LA (or the residual number of diagnosis after deducting diagnosis from non-censored PS) is equal to five times the number of censored PS, then each censored PS was associated with five diagnoses.

In all the other cases, the number of censored patients in each PS and time period, was converted to 1 to 2, 1 to 3, 1 to 4 and 1 to 5 censoring level depending on the total number or residual number of diagnoses at the LA unit level. For example, if an LA had nine censored diagnosis and three censored PS, each censored PS will have a censoring level of 1 to 5 (since it is still possible for one PS to have 5 diagnoses). However, if the LA had 5 diagnoses, then the three censored PS will be censored 1 to 3 since none of them can have all five or four diagnoses.

## References

1. Wong GYC, Yu Q. Generalized MLE of a Joint Distribution Function with Multivariate Interval-Censored Data. *Journal of Multivariate Analysis*. 1999;69(2):155-66.

2. Leacy FP, Floyd S, Yates TA, White IR. Analyses of Sensitivity to the Missing-at-Random Assumption Using Multiple Imputation With Delta Adjustment: Application to a Tuberculosis/HIV Prevalence Survey With Incomplete HIV-Status Data. *Am J Epidemiol.* 2017;185(4):304-15.

Supplementary Table S3: List of variables used in the study

| ID | ID relative to data source | Aggregated data from Hospital Information (linked primary and secondary data) | Spatial Resolution |
|----|----------------------------|-------------------------------------------------------------------------------|--------------------|
| 1  | 1                          | Month                                                                         | Post-code sector   |
| 2  | 2                          | Year                                                                          | Post-code sector   |
| 3  | 3                          | CancerCount (censored)                                                        | Post-code sector   |
| 4  | 4                          | PostcodeSector                                                                | Post-code sector   |
| 5  | 5                          | CancerSite                                                                    | Post-code sector   |
| 6  | 6                          | AgeUnder18                                                                    | Post-code sector   |
| 7  | 7                          | Age18-40                                                                      | Post-code sector   |
| 8  | 8                          | Age40-60                                                                      | Post-code sector   |
| 9  | 9                          | Age60-80                                                                      | Post-code sector   |
| 10 | 10                         | AgeMoreThan80                                                                 | Post-code sector   |
| 11 | 11                         | Male                                                                          | Post-code sector   |
| 12 | 12                         | Female                                                                        | Post-code sector   |
| 13 | 13                         | CKDStage1                                                                     | Post-code sector   |
| 14 | 14                         | CKDStage2                                                                     | Post-code sector   |
| 15 | 15                         | CKDStage3                                                                     | Post-code sector   |
| 16 | 16                         | CKDStage4                                                                     | Post-code sector   |
| 17 | 17                         | CKDStage5                                                                     | Post-code sector   |
| 18 | 18                         | DiabetesType1                                                                 | Post-code sector   |
| 19 | 19                         | DiabetesType2                                                                 | Post-code sector   |
| 20 | 20                         | Diabetes                                                                      | Post-code sector   |
| 21 | 21                         | CKD                                                                           | Post-code sector   |
| 22 | 22                         | CongestiveHeartFailure                                                        | Post-code sector   |
| 23 | 23                         | COPD                                                                          | Post-code sector   |
| 24 | 24                         | CoronaryHeartDisease                                                          | Post-code sector   |
| 25 | 25                         | Covid19                                                                       | Post-code sector   |
| 26 | 26                         | Depression                                                                    | Post-code sector   |
| 27 | 27                         | Hypertensive                                                                  | Post-code sector   |
| 28 | 28                         | FrailtyFit                                                                    | Post-code sector   |
| 29 | 29                         | FrailtyMild                                                                   | Post-code sector   |
| 30 | 30                         | FrailtyModerate                                                               | Post-code sector   |
| 31 | 31                         | FrailtySevere                                                                 | Post-code sector   |
| 32 | 32                         | UnknownSmoker                                                                 | Post-code sector   |
| 33 | 33                         | NeverSmoker                                                                   | Post-code sector   |
| 34 | 34                         | ExSmoker                                                                      | Post-code sector   |
| 35 | 35                         | CurrentSmoker                                                                 | Post-code sector   |



|    |    |                                                       |                    |
|----|----|-------------------------------------------------------|--------------------|
| 36 | 36 | Anxiety                                               | Post-code sector   |
| 37 | 37 | African                                               | Post-code sector   |
| 38 | 38 | British                                               | Post-code sector   |
| 39 | 39 | AnyotherWhitebackground                               | Post-code sector   |
| 40 | 40 | AnyotherBlackbackground                               | Post-code sector   |
| 41 | 41 | AnyotherAsianbackground                               | Post-code sector   |
| 42 | 42 | Anyothermixedbackground                               | Post-code sector   |
| 43 | 43 | Anyotherethnicgroup                                   | Post-code sector   |
| 44 | 44 | English-ethniccategory2001census                      | Post-code sector   |
| 45 | 45 | Irish                                                 | Post-code sector   |
| 46 | 46 | Scottish-ethniccategory2001census                     | Post-code sector   |
| 47 | 47 | Chinese                                               | Post-code sector   |
| 48 | 48 | Indian                                                | Post-code sector   |
| 49 | 49 | Italian-ethniccategory2001census                      | Post-code sector   |
| 50 | 50 | WhiteandBlackAfrican                                  | Post-code sector   |
| 51 | 51 | WhiteandBlackCaribbean                                | Post-code sector   |
| 52 | 52 | WhiteandAsian                                         | Post-code sector   |
| 53 | 53 | OthermixedWhite-ethniccategory2001census              | Post-code sector   |
| 54 | 54 | OthWhiteEuropean/Europeanunsp/MixedEuropean2001census | Post-code sector   |
| 55 | 55 | OtherWhiteorWhiteunspecifiedethniccategory2001census  | Post-code sector   |
| 56 | 56 | Polish-ethniccategory2001census                       | Post-code sector   |
| 57 | 57 | Pakistani                                             | Post-code sector   |
| 58 | 58 | Filipino-ethniccategory2001census                     | Post-code sector   |
| 59 | 59 | Welsh-ethniccategory2001census                        | Post-code sector   |
| 60 | 60 | Bangladeshi                                           | Post-code sector   |
| 61 | 61 | EastAfricanAsian-ethniccategory2001census             | Post-code sector   |
| 62 | 62 | Caribbean                                             | Post-code sector   |
| 63 | 63 | ChineseandWhite-ethniccategory2001census              | Post-code sector   |
| 64 | 64 | NorthernIrish-ethniccategory2001census                | Post-code sector   |
| 65 | 65 | Notknown                                              | Post-code sector   |
| 66 | 66 | Notstated                                             | Post-code sector   |
|    |    | <b>Geography</b>                                      |                    |
| 67 | 1  | Longitude                                             | Post-code centroid |
| 68 | 2  | Latitude                                              | Post-code centroid |
| 69 | 3  | LSOA                                                  | LSOA               |
| 70 | 4  | Local Authority                                       | LA                 |
| 71 | 5  | Total Area                                            | LSOA               |
|    |    | <b>Crime</b>                                          |                    |

|     |    |                                                                                                                    |           |
|-----|----|--------------------------------------------------------------------------------------------------------------------|-----------|
| 72  | 1  | Criminaldamageandanson                                                                                             | Post-code |
| 73  | 2  | Vehiclecrime                                                                                                       | Post-code |
| 74  | 3  | Violenceandsexualoffences                                                                                          | Post-code |
| 75  | 4  | Anti-socialbehaviour                                                                                               | Post-code |
| 76  | 5  | Publicorder                                                                                                        | Post-code |
| 77  | 6  | Burglary                                                                                                           | Post-code |
| 78  | 7  | Shoplifting                                                                                                        | Post-code |
| 79  | 8  | Drugs                                                                                                              | Post-code |
| 80  | 9  | Bicycletheft                                                                                                       | Post-code |
| 81  | 10 | Theftfromtheperson                                                                                                 | Post-code |
| 82  | 11 | Robbery                                                                                                            | Post-code |
| 83  | 12 | Possessionofweapons                                                                                                | Post-code |
| 84  | 13 | Othercrime                                                                                                         | Post-code |
| 85  | 14 | Othertheft                                                                                                         | Post-code |
|     |    | <b>Census 2011</b>                                                                                                 |           |
| 86  | 1  | Sex_Allpersons;Age_Allcategories_Age;EthnicGroup_White_Total;measures_Value                                        | LA        |
| 87  | 2  | Sex_Allpersons;Age_Allcategories_Age;EthnicGroup_White_English/Welsh/Scottish/NorthernIrish/British;measures_Value | LA        |
| 88  | 3  | Sex_Allpersons;Age_Allcategories_Age;EthnicGroup_White_Irish;measures_Value                                        | LA        |
| 89  | 4  | Sex_Allpersons;Age_Allcategories_Age;EthnicGroup_White_GypsyorIrishTraveller;measures_Value                        | LA        |
| 90  | 5  | Sex_Allpersons;Age_Allcategories_Age;EthnicGroup_White_OtherWhite;measures_Value                                   | LA        |
| 91  | 6  | Sex_Allpersons;Age_Allcategories_Age;EthnicGroup_Mixed/multipleethnicgroup_Total;measures_Value                    | LA        |
| 92  | 7  | Sex_Allpersons;Age_Allcategories_Age;EthnicGroup_Mixed/multipleethnicgroup_WhiteandBlackCaribbean;measures_Value   | LA        |
| 93  | 8  | Sex_Allpersons;Age_Allcategories_Age;EthnicGroup_Mixed/multipleethnicgroup_WhiteandBlackAfrican;measures_Value     | LA        |
| 94  | 9  | Sex_Allpersons;Age_Allcategories_Age;EthnicGroup_Mixed/multipleethnicgroup_WhiteandAsian;measures_Value            | LA        |
| 95  | 10 | Sex_Allpersons;Age_Allcategories_Age;EthnicGroup_Mixed/multipleethnicgroup_OtherMixed;measures_Value               | LA        |
| 96  | 11 | Sex_Allpersons;Age_Allcategories_Age;EthnicGroup_Asian/AsianBritish_Total;measures_Value                           | LA        |
| 97  | 12 | Sex_Allpersons;Age_Allcategories_Age;EthnicGroup_Asian/AsianBritish_Indian;measures_Value                          | LA        |
| 98  | 13 | Sex_Allpersons;Age_Allcategories_Age;EthnicGroup_Asian/AsianBritish_Pakistani;measures_Value                       | LA        |
| 99  | 14 | Sex_Allpersons;Age_Allcategories_Age;EthnicGroup_Asian/AsianBritish_Bangladeshi;measures_Value                     | LA        |
| 100 | 15 | Sex_Allpersons;Age_Allcategories_Age;EthnicGroup_Asian/AsianBritish_Chinese;measures_Value                         | LA        |
| 101 | 16 | Sex_Allpersons;Age_Allcategories_Age;EthnicGroup_Asian/AsianBritish_OtherAsian;measures_Value                      | LA        |
| 102 | 17 | Sex_Allpersons;Age_Allcategories_Age;EthnicGroup_Black/African/Caribbean/BlackBritish_Total;measures_Value         | LA        |
| 103 | 18 | Sex_Allpersons;Age_Allcategories_Age;EthnicGroup_Black/African/Caribbean/BlackBritish_African;measures_Value       | LA        |
| 104 | 19 | Sex_Allpersons;Age_Allcategories_Age;EthnicGroup_Black/African/Caribbean/BlackBritish_Caribbean;measures_Value     | LA        |
| 105 | 20 | Sex_Allpersons;Age_Allcategories_Age;EthnicGroup_Black/African/Caribbean/BlackBritish_OtherBlack;measures_Value    | LA        |
| 106 | 21 | Sex_Allpersons;Age_Allcategories_Age;EthnicGroup_Otherethnicgroup_Total;measures_Value                             | LA        |
| 107 | 22 | Sex_Allpersons;Age_Allcategories_Age;EthnicGroup_Otherethnicgroup_Arab;measures_Value                              | LA        |
| 108 | 23 | Sex_Allpersons;Age_Allcategories_Age;EthnicGroup_Otherethnicgroup_Anyotherethnicgroup;measures_Value               | LA        |

|     |    |                                                                                                            |    |
|-----|----|------------------------------------------------------------------------------------------------------------|----|
| 109 | 24 | Sex_Allpersons;Age_Age0to24;EthnicGroup_Allcategories_Ethnicgroup;measures_Value                           | LA |
| 110 | 25 | Sex_Allpersons;Age_Age0to24;EthnicGroup_White_Total;measures_Value                                         | LA |
| 111 | 26 | Sex_Allpersons;Age_Age0to24;EthnicGroup_White_English/Welsh/Scottish/NorthernIrish/British;measures_Value  | LA |
| 112 | 27 | Sex_Allpersons;Age_Age0to24;EthnicGroup_White_Irish;measures_Value                                         | LA |
| 113 | 28 | Sex_Allpersons;Age_Age0to24;EthnicGroup_White_GypsyorIrishTraveller;measures_Value                         | LA |
| 114 | 29 | Sex_Allpersons;Age_Age0to24;EthnicGroup_White_OtherWhite;measures_Value                                    | LA |
| 115 | 30 | Sex_Allpersons;Age_Age0to24;EthnicGroup_Mixed/multipleethnicgroup_Total;measures_Value                     | LA |
| 116 | 31 | Sex_Allpersons;Age_Age0to24;EthnicGroup_Mixed/multipleethnicgroup_WhiteandBlackCaribbean;measures_Value    | LA |
| 117 | 32 | Sex_Allpersons;Age_Age0to24;EthnicGroup_Mixed/multipleethnicgroup_WhiteandBlackAfrican;measures_Value      | LA |
| 118 | 33 | Sex_Allpersons;Age_Age0to24;EthnicGroup_Mixed/multipleethnicgroup_WhiteandAsian;measures_Value             | LA |
| 119 | 34 | Sex_Allpersons;Age_Age0to24;EthnicGroup_Mixed/multipleethnicgroup_OtherMixed;measures_Value                | LA |
| 120 | 35 | Sex_Allpersons;Age_Age0to24;EthnicGroup_Asian/AsianBritish_Total;measures_Value                            | LA |
| 121 | 36 | Sex_Allpersons;Age_Age0to24;EthnicGroup_Asian/AsianBritish_Indian;measures_Value                           | LA |
| 122 | 37 | Sex_Allpersons;Age_Age0to24;EthnicGroup_Asian/AsianBritish_Pakistani;measures_Value                        | LA |
| 123 | 38 | Sex_Allpersons;Age_Age0to24;EthnicGroup_Asian/AsianBritish_Bangladeshi;measures_Value                      | LA |
| 124 | 39 | Sex_Allpersons;Age_Age0to24;EthnicGroup_Asian/AsianBritish_Chinese;measures_Value                          | LA |
| 125 | 40 | Sex_Allpersons;Age_Age0to24;EthnicGroup_Asian/AsianBritish_OtherAsian;measures_Value                       | LA |
| 126 | 41 | Sex_Allpersons;Age_Age0to24;EthnicGroup_Black/African/Caribbean/BlackBritish_Total;measures_Value          | LA |
| 127 | 42 | Sex_Allpersons;Age_Age0to24;EthnicGroup_Black/African/Caribbean/BlackBritish_African;measures_Value        | LA |
| 128 | 43 | Sex_Allpersons;Age_Age0to24;EthnicGroup_Black/African/Caribbean/BlackBritish_Caribbean;measures_Value      | LA |
| 129 | 44 | Sex_Allpersons;Age_Age0to24;EthnicGroup_Black/African/Caribbean/BlackBritish_OtherBlack;measures_Value     | LA |
| 130 | 45 | Sex_Allpersons;Age_Age0to24;EthnicGroup_Otherethnicgroup_Total;measures_Value                              | LA |
| 131 | 46 | Sex_Allpersons;Age_Age0to24;EthnicGroup_Otherethnicgroup_Arab;measures_Value                               | LA |
| 132 | 47 | Sex_Allpersons;Age_Age0to24;EthnicGroup_Otherethnicgroup_Anyotherethnicgroup;measures_Value                | LA |
| 133 | 48 | Sex_Allpersons;Age_Age25to49;EthnicGroup_Allcategories_Ethnicgroup;measures_Value                          | LA |
| 134 | 49 | Sex_Allpersons;Age_Age25to49;EthnicGroup_White_Total;measures_Value                                        | LA |
| 135 | 50 | Sex_Allpersons;Age_Age25to49;EthnicGroup_White_English/Welsh/Scottish/NorthernIrish/British;measures_Value | LA |
| 136 | 51 | Sex_Allpersons;Age_Age25to49;EthnicGroup_White_Irish;measures_Value                                        | LA |
| 137 | 52 | Sex_Allpersons;Age_Age25to49;EthnicGroup_White_GypsyorIrishTraveller;measures_Value                        | LA |
| 138 | 53 | Sex_Allpersons;Age_Age25to49;EthnicGroup_White_OtherWhite;measures_Value                                   | LA |
| 139 | 54 | Sex_Allpersons;Age_Age25to49;EthnicGroup_Mixed/multipleethnicgroup_Total;measures_Value                    | LA |
| 140 | 55 | Sex_Allpersons;Age_Age25to49;EthnicGroup_Mixed/multipleethnicgroup_WhiteandBlackCaribbean;measures_Value   | LA |
| 141 | 56 | Sex_Allpersons;Age_Age25to49;EthnicGroup_Mixed/multipleethnicgroup_WhiteandBlackAfrican;measures_Value     | LA |
| 142 | 57 | Sex_Allpersons;Age_Age25to49;EthnicGroup_Mixed/multipleethnicgroup_WhiteandAsian;measures_Value            | LA |
| 143 | 58 | Sex_Allpersons;Age_Age25to49;EthnicGroup_Mixed/multipleethnicgroup_OtherMixed;measures_Value               | LA |
| 144 | 59 | Sex_Allpersons;Age_Age25to49;EthnicGroup_Asian/AsianBritish_Total;measures_Value                           | LA |
| 145 | 60 | Sex_Allpersons;Age_Age25to49;EthnicGroup_Asian/AsianBritish_Indian;measures_Value                          | LA |
| 146 | 61 | Sex_Allpersons;Age_Age25to49;EthnicGroup_Asian/AsianBritish_Pakistani;measures_Value                       | LA |

|     |    |                                                                                                               |    |
|-----|----|---------------------------------------------------------------------------------------------------------------|----|
| 147 | 62 | Sex_Allpersons;Age_Age25to49;EthnicGroup_Asian/AsianBritish_Bangladeshi;measures_Value                        | LA |
| 148 | 63 | Sex_Allpersons;Age_Age25to49;EthnicGroup_Asian/AsianBritish_Chinese;measures_Value                            | LA |
| 149 | 64 | Sex_Allpersons;Age_Age25to49;EthnicGroup_Asian/AsianBritish_OtherAsian;measures_Value                         | LA |
| 150 | 65 | Sex_Allpersons;Age_Age25to49;EthnicGroup_Black/African/Caribbean/BlackBritish_Total;measures_Value            | LA |
| 151 | 66 | Sex_Allpersons;Age_Age25to49;EthnicGroup_Black/African/Caribbean/BlackBritish_African;measures_Value          | LA |
| 152 | 67 | Sex_Allpersons;Age_Age25to49;EthnicGroup_Black/African/Caribbean/BlackBritish_Caribbean;measures_Value        | LA |
| 153 | 68 | Sex_Allpersons;Age_Age25to49;EthnicGroup_Black/African/Caribbean/BlackBritish_OtherBlack;measures_Value       | LA |
| 154 | 69 | Sex_Allpersons;Age_Age25to49;EthnicGroup_Otherethnicgroup_Total;measures_Value                                | LA |
| 155 | 70 | Sex_Allpersons;Age_Age25to49;EthnicGroup_Otherethnicgroup_Arab;measures_Value                                 | LA |
| 156 | 71 | Sex_Allpersons;Age_Age25to49;EthnicGroup_Otherethnicgroup_Anyotherethnicgroup;measures_Value                  | LA |
| 157 | 72 | Sex_Allpersons;Age_Age50to64;EthnicGroup_Allcategories_Ethnicgroup;measures_Value                             | LA |
| 158 | 73 | Sex_Allpersons;Age_Age50to64;EthnicGroup_White_Total;measures_Value                                           | LA |
| 159 | 74 | Sex_Allpersons;Age_Age50to64;EthnicGroup_White_English/Welsh/Scottish/NorthernIrish/British;measures_Value    | LA |
| 160 | 75 | Sex_Allpersons;Age_Age50to64;EthnicGroup_White_Irish;measures_Value                                           | LA |
| 161 | 76 | Sex_Allpersons;Age_Age50to64;EthnicGroup_White_GypsyorIrishTraveller;measures_Value                           | LA |
| 162 | 77 | Sex_Allpersons;Age_Age50to64;EthnicGroup_White_OtherWhite;measures_Value                                      | LA |
| 163 | 78 | Sex_Allpersons;Age_Age50to64;EthnicGroup_Mixed/multipleethnicgroup_Total;measures_Value                       | LA |
| 164 | 79 | Sex_Allpersons;Age_Age50to64;EthnicGroup_Mixed/multipleethnicgroup_WhiteandBlackCaribbean;measures_Value      | LA |
| 165 | 80 | Sex_Allpersons;Age_Age50to64;EthnicGroup_Mixed/multipleethnicgroup_WhiteandBlackAfrican;measures_Value        | LA |
| 166 | 81 | Sex_Allpersons;Age_Age50to64;EthnicGroup_Mixed/multipleethnicgroup_WhiteandAsian;measures_Value               | LA |
| 167 | 82 | Sex_Allpersons;Age_Age50to64;EthnicGroup_Mixed/multipleethnicgroup_OtherMixed;measures_Value                  | LA |
| 168 | 83 | Sex_Allpersons;Age_Age50to64;EthnicGroup_Asian/AsianBritish_Total;measures_Value                              | LA |
| 169 | 84 | Sex_Allpersons;Age_Age50to64;EthnicGroup_Asian/AsianBritish_Indian;measures_Value                             | LA |
| 170 | 85 | Sex_Allpersons;Age_Age50to64;EthnicGroup_Asian/AsianBritish_Pakistani;measures_Value                          | LA |
| 171 | 86 | Sex_Allpersons;Age_Age50to64;EthnicGroup_Asian/AsianBritish_Bangladeshi;measures_Value                        | LA |
| 172 | 87 | Sex_Allpersons;Age_Age50to64;EthnicGroup_Asian/AsianBritish_Chinese;measures_Value                            | LA |
| 173 | 88 | Sex_Allpersons;Age_Age50to64;EthnicGroup_Asian/AsianBritish_OtherAsian;measures_Value                         | LA |
| 174 | 89 | Sex_Allpersons;Age_Age50to64;EthnicGroup_Black/African/Caribbean/BlackBritish_Total;measures_Value            | LA |
| 175 | 90 | Sex_Allpersons;Age_Age50to64;EthnicGroup_Black/African/Caribbean/BlackBritish_African;measures_Value          | LA |
| 176 | 91 | Sex_Allpersons;Age_Age50to64;EthnicGroup_Black/African/Caribbean/BlackBritish_Caribbean;measures_Value        | LA |
| 177 | 92 | Sex_Allpersons;Age_Age50to64;EthnicGroup_Black/African/Caribbean/BlackBritish_OtherBlack;measures_Value       | LA |
| 178 | 93 | Sex_Allpersons;Age_Age50to64;EthnicGroup_Otherethnicgroup_Total;measures_Value                                | LA |
| 179 | 94 | Sex_Allpersons;Age_Age50to64;EthnicGroup_Otherethnicgroup_Arab;measures_Value                                 | LA |
| 180 | 95 | Sex_Allpersons;Age_Age50to64;EthnicGroup_Otherethnicgroup_Anyotherethnicgroup;measures_Value                  | LA |
| 181 | 96 | Sex_Allpersons;Age_Age65andover;EthnicGroup_Allcategories_Ethnicgroup;measures_Value                          | LA |
| 182 | 97 | Sex_Allpersons;Age_Age65andover;EthnicGroup_White_Total;measures_Value                                        | LA |
| 183 | 98 | Sex_Allpersons;Age_Age65andover;EthnicGroup_White_English/Welsh/Scottish/NorthernIrish/British;measures_Value | LA |
| 184 | 99 | Sex_Allpersons;Age_Age65andover;EthnicGroup_White_Irish;measures_Value                                        | LA |

|     |     |                                                                                                               |    |
|-----|-----|---------------------------------------------------------------------------------------------------------------|----|
| 185 | 100 | Sex_Allpersons;Age_Age65andover;EthnicGroup_White_GypsyorIrishTraveller;measures_Value                        | LA |
| 186 | 101 | Sex_Allpersons;Age_Age65andover;EthnicGroup_White_OtherWhite;measures_Value                                   | LA |
| 187 | 102 | Sex_Allpersons;Age_Age65andover;EthnicGroup_Mixed/multipleethnicgroup_Total;measures_Value                    | LA |
| 188 | 103 | Sex_Allpersons;Age_Age65andover;EthnicGroup_Mixed/multipleethnicgroup_WhiteandBlackCaribbean;measures_Value   | LA |
| 189 | 104 | Sex_Allpersons;Age_Age65andover;EthnicGroup_Mixed/multipleethnicgroup_WhiteandBlackAfrican;measures_Value     | LA |
| 190 | 105 | Sex_Allpersons;Age_Age65andover;EthnicGroup_Mixed/multipleethnicgroup_WhiteandAsian;measures_Value            | LA |
| 191 | 106 | Sex_Allpersons;Age_Age65andover;EthnicGroup_Mixed/multipleethnicgroup_OtherMixed;measures_Value               | LA |
| 192 | 107 | Sex_Allpersons;Age_Age65andover;EthnicGroup_Asian/AsianBritish_Total;measures_Value                           | LA |
| 193 | 108 | Sex_Allpersons;Age_Age65andover;EthnicGroup_Asian/AsianBritish_Indian;measures_Value                          | LA |
| 194 | 109 | Sex_Allpersons;Age_Age65andover;EthnicGroup_Asian/AsianBritish_Pakistani;measures_Value                       | LA |
| 195 | 110 | Sex_Allpersons;Age_Age65andover;EthnicGroup_Asian/AsianBritish_Bangladeshi;measures_Value                     | LA |
| 196 | 111 | Sex_Allpersons;Age_Age65andover;EthnicGroup_Asian/AsianBritish_Chinese;measures_Value                         | LA |
| 197 | 112 | Sex_Allpersons;Age_Age65andover;EthnicGroup_Asian/AsianBritish_OtherAsian;measures_Value                      | LA |
| 198 | 113 | Sex_Allpersons;Age_Age65andover;EthnicGroup_Black/African/Caribbean/BlackBritish_Total;measures_Value         | LA |
| 199 | 114 | Sex_Allpersons;Age_Age65andover;EthnicGroup_Black/African/Caribbean/BlackBritish_African;measures_Value       | LA |
| 200 | 115 | Sex_Allpersons;Age_Age65andover;EthnicGroup_Black/African/Caribbean/BlackBritish_Caribbean;measures_Value     | LA |
| 201 | 116 | Sex_Allpersons;Age_Age65andover;EthnicGroup_Black/African/Caribbean/BlackBritish_OtherBlack;measures_Value    | LA |
| 202 | 117 | Sex_Allpersons;Age_Age65andover;EthnicGroup_Otherethnicgroup_Total;measures_Value                             | LA |
| 203 | 118 | Sex_Allpersons;Age_Age65andover;EthnicGroup_Otherethnicgroup_Arab;measures_Value                              | LA |
| 204 | 119 | Sex_Allpersons;Age_Age65andover;EthnicGroup_Otherethnicgroup_Anyotherethnicgroup;measures_Value               | LA |
| 205 | 120 | Sex_Males;Age_Allcategories_Age;EthnicGroup_Allcategories_Ethnicgroup;measures_Value                          | LA |
| 206 | 121 | Sex_Males;Age_Allcategories_Age;EthnicGroup_White_Total;measures_Value                                        | LA |
| 207 | 122 | Sex_Males;Age_Allcategories_Age;EthnicGroup_White_English/Welsh/Scottish/NorthernIrish/British;measures_Value | LA |
| 208 | 123 | Sex_Males;Age_Allcategories_Age;EthnicGroup_White_Irish;measures_Value                                        | LA |
| 209 | 124 | Sex_Males;Age_Allcategories_Age;EthnicGroup_White_GypsyorIrishTraveller;measures_Value                        | LA |
| 210 | 125 | Sex_Males;Age_Allcategories_Age;EthnicGroup_White_OtherWhite;measures_Value                                   | LA |
| 211 | 126 | Sex_Males;Age_Allcategories_Age;EthnicGroup_Mixed/multipleethnicgroup_Total;measures_Value                    | LA |
| 212 | 127 | Sex_Males;Age_Allcategories_Age;EthnicGroup_Mixed/multipleethnicgroup_WhiteandBlackCaribbean;measures_Value   | LA |
| 213 | 128 | Sex_Males;Age_Allcategories_Age;EthnicGroup_Mixed/multipleethnicgroup_WhiteandBlackAfrican;measures_Value     | LA |
| 214 | 129 | Sex_Males;Age_Allcategories_Age;EthnicGroup_Mixed/multipleethnicgroup_WhiteandAsian;measures_Value            | LA |
| 215 | 130 | Sex_Males;Age_Allcategories_Age;EthnicGroup_Mixed/multipleethnicgroup_OtherMixed;measures_Value               | LA |
| 216 | 131 | Sex_Males;Age_Allcategories_Age;EthnicGroup_Asian/AsianBritish_Total;measures_Value                           | LA |
| 217 | 132 | Sex_Males;Age_Allcategories_Age;EthnicGroup_Asian/AsianBritish_Indian;measures_Value                          | LA |
| 218 | 133 | Sex_Males;Age_Allcategories_Age;EthnicGroup_Asian/AsianBritish_Pakistani;measures_Value                       | LA |
| 219 | 134 | Sex_Males;Age_Allcategories_Age;EthnicGroup_Asian/AsianBritish_Bangladeshi;measures_Value                     | LA |
| 220 | 135 | Sex_Males;Age_Allcategories_Age;EthnicGroup_Asian/AsianBritish_Chinese;measures_Value                         | LA |
| 221 | 136 | Sex_Males;Age_Allcategories_Age;EthnicGroup_Asian/AsianBritish_OtherAsian;measures_Value                      | LA |
| 222 | 137 | Sex_Males;Age_Allcategories_Age;EthnicGroup_Black/African/Caribbean/BlackBritish_Total;measures_Value         | LA |

|     |     |                                                                                                            |    |
|-----|-----|------------------------------------------------------------------------------------------------------------|----|
| 223 | 138 | Sex_Males;Age_Allcategories_Age;EthnicGroup_Black/African/Caribbean/BlackBritish_African;measures_Value    | LA |
| 224 | 139 | Sex_Males;Age_Allcategories_Age;EthnicGroup_Black/African/Caribbean/BlackBritish_Caribbean;measures_Value  | LA |
| 225 | 140 | Sex_Males;Age_Allcategories_Age;EthnicGroup_Black/African/Caribbean/BlackBritish_OtherBlack;measures_Value | LA |
| 226 | 141 | Sex_Males;Age_Allcategories_Age;EthnicGroup_Otherethnicgroup_Total;measures_Value                          | LA |
| 227 | 142 | Sex_Males;Age_Allcategories_Age;EthnicGroup_Otherethnicgroup_Arab;measures_Value                           | LA |
| 228 | 143 | Sex_Males;Age_Allcategories_Age;EthnicGroup_Otherethnicgroup_Anyotherethnicgroup;measures_Value            | LA |
| 229 | 144 | Sex_Males;Age_Age0to24;EthnicGroup_Allcategories_Ethnicgroup;measures_Value                                | LA |
| 230 | 145 | Sex_Males;Age_Age0to24;EthnicGroup_White_Total;measures_Value                                              | LA |
| 231 | 146 | Sex_Males;Age_Age0to24;EthnicGroup_White_English/Welsh/Scottish/NorthernIrish/British;measures_Value       | LA |
| 232 | 147 | Sex_Males;Age_Age0to24;EthnicGroup_White_Irish;measures_Value                                              | LA |
| 233 | 148 | Sex_Males;Age_Age0to24;EthnicGroup_White_GypsyorIrishTraveller;measures_Value                              | LA |
| 234 | 149 | Sex_Males;Age_Age0to24;EthnicGroup_White_OtherWhite;measures_Value                                         | LA |
| 235 | 150 | Sex_Males;Age_Age0to24;EthnicGroup_Mixed/multipleethnicgroup_Total;measures_Value                          | LA |
| 236 | 151 | Sex_Males;Age_Age0to24;EthnicGroup_Mixed/multipleethnicgroup_WhiteandBlackCaribbean;measures_Value         | LA |
| 237 | 152 | Sex_Males;Age_Age0to24;EthnicGroup_Mixed/multipleethnicgroup_WhiteandBlackAfrican;measures_Value           | LA |
| 238 | 153 | Sex_Males;Age_Age0to24;EthnicGroup_Mixed/multipleethnicgroup_WhiteandAsian;measures_Value                  | LA |
| 239 | 154 | Sex_Males;Age_Age0to24;EthnicGroup_Mixed/multipleethnicgroup_OtherMixed;measures_Value                     | LA |
| 240 | 155 | Sex_Males;Age_Age0to24;EthnicGroup_Asian/AsianBritish_Total;measures_Value                                 | LA |
| 241 | 156 | Sex_Males;Age_Age0to24;EthnicGroup_Asian/AsianBritish_Indian;measures_Value                                | LA |
| 242 | 157 | Sex_Males;Age_Age0to24;EthnicGroup_Asian/AsianBritish_Pakistani;measures_Value                             | LA |
| 243 | 158 | Sex_Males;Age_Age0to24;EthnicGroup_Asian/AsianBritish_Bangladeshi;measures_Value                           | LA |
| 244 | 159 | Sex_Males;Age_Age0to24;EthnicGroup_Asian/AsianBritish_Chinese;measures_Value                               | LA |
| 245 | 160 | Sex_Males;Age_Age0to24;EthnicGroup_Asian/AsianBritish_OtherAsian;measures_Value                            | LA |
| 246 | 161 | Sex_Males;Age_Age0to24;EthnicGroup_Black/African/Caribbean/BlackBritish_Total;measures_Value               | LA |
| 247 | 162 | Sex_Males;Age_Age0to24;EthnicGroup_Black/African/Caribbean/BlackBritish_African;measures_Value             | LA |
| 248 | 163 | Sex_Males;Age_Age0to24;EthnicGroup_Black/African/Caribbean/BlackBritish_Caribbean;measures_Value           | LA |
| 249 | 164 | Sex_Males;Age_Age0to24;EthnicGroup_Black/African/Caribbean/BlackBritish_OtherBlack;measures_Value          | LA |
| 250 | 165 | Sex_Males;Age_Age0to24;EthnicGroup_Otherethnicgroup_Total;measures_Value                                   | LA |
| 251 | 166 | Sex_Males;Age_Age0to24;EthnicGroup_Otherethnicgroup_Arab;measures_Value                                    | LA |
| 252 | 167 | Sex_Males;Age_Age0to24;EthnicGroup_Otherethnicgroup_Anyotherethnicgroup;measures_Value                     | LA |
| 253 | 168 | Sex_Males;Age_Age25to49;EthnicGroup_Allcategories_Ethnicgroup;measures_Value                               | LA |
| 254 | 169 | Sex_Males;Age_Age25to49;EthnicGroup_White_Total;measures_Value                                             | LA |
| 255 | 170 | Sex_Males;Age_Age25to49;EthnicGroup_White_English/Welsh/Scottish/NorthernIrish/British;measures_Value      | LA |
| 256 | 171 | Sex_Males;Age_Age25to49;EthnicGroup_White_Irish;measures_Value                                             | LA |
| 257 | 172 | Sex_Males;Age_Age25to49;EthnicGroup_White_GypsyorIrishTraveller;measures_Value                             | LA |
| 258 | 173 | Sex_Males;Age_Age25to49;EthnicGroup_White_OtherWhite;measures_Value                                        | LA |
| 259 | 174 | Sex_Males;Age_Age25to49;EthnicGroup_Mixed/multipleethnicgroup_Total;measures_Value                         | LA |
| 260 | 175 | Sex_Males;Age_Age25to49;EthnicGroup_Mixed/multipleethnicgroup_WhiteandBlackCaribbean;measures_Value        | LA |

|     |     |                                                                                                       |    |
|-----|-----|-------------------------------------------------------------------------------------------------------|----|
| 261 | 176 | Sex_Males;Age_Age25to49;EthnicGroup_Mixed/multipleethnicgroup_WhiteandBlackAfrican;measures_Value     | LA |
| 262 | 177 | Sex_Males;Age_Age25to49;EthnicGroup_Mixed/multipleethnicgroup_WhiteandAsian;measures_Value            | LA |
| 263 | 178 | Sex_Males;Age_Age25to49;EthnicGroup_Mixed/multipleethnicgroup_OtherMixed;measures_Value               | LA |
| 264 | 179 | Sex_Males;Age_Age25to49;EthnicGroup_Asian/AsianBritish_Total;measures_Value                           | LA |
| 265 | 180 | Sex_Males;Age_Age25to49;EthnicGroup_Asian/AsianBritish_Indian;measures_Value                          | LA |
| 266 | 181 | Sex_Males;Age_Age25to49;EthnicGroup_Asian/AsianBritish_Pakistani;measures_Value                       | LA |
| 267 | 182 | Sex_Males;Age_Age25to49;EthnicGroup_Asian/AsianBritish_Bangladeshi;measures_Value                     | LA |
| 268 | 183 | Sex_Males;Age_Age25to49;EthnicGroup_Asian/AsianBritish_Chinese;measures_Value                         | LA |
| 269 | 184 | Sex_Males;Age_Age25to49;EthnicGroup_Asian/AsianBritish_OtherAsian;measures_Value                      | LA |
| 270 | 185 | Sex_Males;Age_Age25to49;EthnicGroup_Black/African/Caribbean/BlackBritish_Total;measures_Value         | LA |
| 271 | 186 | Sex_Males;Age_Age25to49;EthnicGroup_Black/African/Caribbean/BlackBritish_African;measures_Value       | LA |
| 272 | 187 | Sex_Males;Age_Age25to49;EthnicGroup_Black/African/Caribbean/BlackBritish_Caribbean;measures_Value     | LA |
| 273 | 188 | Sex_Males;Age_Age25to49;EthnicGroup_Black/African/Caribbean/BlackBritish_OtherBlack;measures_Value    | LA |
| 274 | 189 | Sex_Males;Age_Age25to49;EthnicGroup_Otherethnicgroup_Total;measures_Value                             | LA |
| 275 | 190 | Sex_Males;Age_Age25to49;EthnicGroup_Otherethnicgroup_Arab;measures_Value                              | LA |
| 276 | 191 | Sex_Males;Age_Age25to49;EthnicGroup_Otherethnicgroup_Anyotherethnicgroup;measures_Value               | LA |
| 277 | 192 | Sex_Males;Age_Age50to64;EthnicGroup_Allcategories_Ethnicgroup;measures_Value                          | LA |
| 278 | 193 | Sex_Males;Age_Age50to64;EthnicGroup_White_Total;measures_Value                                        | LA |
| 279 | 194 | Sex_Males;Age_Age50to64;EthnicGroup_White_English/Welsh/Scottish/NorthernIrish/British;measures_Value | LA |
| 280 | 195 | Sex_Males;Age_Age50to64;EthnicGroup_White_Irish;measures_Value                                        | LA |
| 281 | 196 | Sex_Males;Age_Age50to64;EthnicGroup_White_GypsyorIrishTraveller;measures_Value                        | LA |
| 282 | 197 | Sex_Males;Age_Age50to64;EthnicGroup_White_OtherWhite;measures_Value                                   | LA |
| 283 | 198 | Sex_Males;Age_Age50to64;EthnicGroup_Mixed/multipleethnicgroup_Total;measures_Value                    | LA |
| 284 | 199 | Sex_Males;Age_Age50to64;EthnicGroup_Mixed/multipleethnicgroup_WhiteandBlackCaribbean;measures_Value   | LA |
| 285 | 200 | Sex_Males;Age_Age50to64;EthnicGroup_Mixed/multipleethnicgroup_WhiteandBlackAfrican;measures_Value     | LA |
| 286 | 201 | Sex_Males;Age_Age50to64;EthnicGroup_Mixed/multipleethnicgroup_WhiteandAsian;measures_Value            | LA |
| 287 | 202 | Sex_Males;Age_Age50to64;EthnicGroup_Mixed/multipleethnicgroup_OtherMixed;measures_Value               | LA |
| 288 | 203 | Sex_Males;Age_Age50to64;EthnicGroup_Asian/AsianBritish_Total;measures_Value                           | LA |
| 289 | 204 | Sex_Males;Age_Age50to64;EthnicGroup_Asian/AsianBritish_Indian;measures_Value                          | LA |
| 290 | 205 | Sex_Males;Age_Age50to64;EthnicGroup_Asian/AsianBritish_Pakistani;measures_Value                       | LA |
| 291 | 206 | Sex_Males;Age_Age50to64;EthnicGroup_Asian/AsianBritish_Bangladeshi;measures_Value                     | LA |
| 292 | 207 | Sex_Males;Age_Age50to64;EthnicGroup_Asian/AsianBritish_Chinese;measures_Value                         | LA |
| 293 | 208 | Sex_Males;Age_Age50to64;EthnicGroup_Asian/AsianBritish_OtherAsian;measures_Value                      | LA |
| 294 | 209 | Sex_Males;Age_Age50to64;EthnicGroup_Black/African/Caribbean/BlackBritish_Total;measures_Value         | LA |
| 295 | 210 | Sex_Males;Age_Age50to64;EthnicGroup_Black/African/Caribbean/BlackBritish_African;measures_Value       | LA |
| 296 | 211 | Sex_Males;Age_Age50to64;EthnicGroup_Black/African/Caribbean/BlackBritish_Caribbean;measures_Value     | LA |
| 297 | 212 | Sex_Males;Age_Age50to64;EthnicGroup_Black/African/Caribbean/BlackBritish_OtherBlack;measures_Value    | LA |
| 298 | 213 | Sex_Males;Age_Age50to64;EthnicGroup_Otherethnicgroup_Total;measures_Value                             | LA |

|     |     |                                                                                                                 |    |
|-----|-----|-----------------------------------------------------------------------------------------------------------------|----|
| 299 | 214 | Sex_Males;Age_Age50to64;EthnicGroup_Otherethnicgroup_Arab;measures_Value                                        | LA |
| 300 | 215 | Sex_Males;Age_Age50to64;EthnicGroup_Otherethnicgroup_Anyotherethnicgroup;measures_Value                         | LA |
| 301 | 216 | Sex_Males;Age_Age65andover;EthnicGroup_Allcategories_Ethnicgroup;measures_Value                                 | LA |
| 302 | 217 | Sex_Males;Age_Age65andover;EthnicGroup_White_Total;measures_Value                                               | LA |
| 303 | 218 | Sex_Males;Age_Age65andover;EthnicGroup_White_English/Welsh/Scottish/NorthernIrish/British;measures_Value        | LA |
| 304 | 219 | Sex_Males;Age_Age65andover;EthnicGroup_White_Irish;measures_Value                                               | LA |
| 305 | 220 | Sex_Males;Age_Age65andover;EthnicGroup_White_GypsyorIrishTraveller;measures_Value                               | LA |
| 306 | 221 | Sex_Males;Age_Age65andover;EthnicGroup_White_OtherWhite;measures_Value                                          | LA |
| 307 | 222 | Sex_Males;Age_Age65andover;EthnicGroup_Mixed/multipleethnicgroup_Total;measures_Value                           | LA |
| 308 | 223 | Sex_Males;Age_Age65andover;EthnicGroup_Mixed/multipleethnicgroup_WhiteandBlackCaribbean;measures_Value          | LA |
| 309 | 224 | Sex_Males;Age_Age65andover;EthnicGroup_Mixed/multipleethnicgroup_WhiteandBlackAfrican;measures_Value            | LA |
| 310 | 225 | Sex_Males;Age_Age65andover;EthnicGroup_Mixed/multipleethnicgroup_WhiteandAsian;measures_Value                   | LA |
| 311 | 226 | Sex_Males;Age_Age65andover;EthnicGroup_Mixed/multipleethnicgroup_OtherMixed;measures_Value                      | LA |
| 312 | 227 | Sex_Males;Age_Age65andover;EthnicGroup_Asian/AsianBritish_Total;measures_Value                                  | LA |
| 313 | 228 | Sex_Males;Age_Age65andover;EthnicGroup_Asian/AsianBritish_Indian;measures_Value                                 | LA |
| 314 | 229 | Sex_Males;Age_Age65andover;EthnicGroup_Asian/AsianBritish_Pakistani;measures_Value                              | LA |
| 315 | 230 | Sex_Males;Age_Age65andover;EthnicGroup_Asian/AsianBritish_Bangladeshi;measures_Value                            | LA |
| 316 | 231 | Sex_Males;Age_Age65andover;EthnicGroup_Asian/AsianBritish_Chinese;measures_Value                                | LA |
| 317 | 232 | Sex_Males;Age_Age65andover;EthnicGroup_Asian/AsianBritish_OtherAsian;measures_Value                             | LA |
| 318 | 233 | Sex_Males;Age_Age65andover;EthnicGroup_Black/African/Caribbean/BlackBritish_Total;measures_Value                | LA |
| 319 | 234 | Sex_Males;Age_Age65andover;EthnicGroup_Black/African/Caribbean/BlackBritish_African;measures_Value              | LA |
| 320 | 235 | Sex_Males;Age_Age65andover;EthnicGroup_Black/African/Caribbean/BlackBritish_Caribbean;measures_Value            | LA |
| 321 | 236 | Sex_Males;Age_Age65andover;EthnicGroup_Black/African/Caribbean/BlackBritish_OtherBlack;measures_Value           | LA |
| 322 | 237 | Sex_Males;Age_Age65andover;EthnicGroup_Otherethnicgroup_Total;measures_Value                                    | LA |
| 323 | 238 | Sex_Males;Age_Age65andover;EthnicGroup_Otherethnicgroup_Arab;measures_Value                                     | LA |
| 324 | 239 | Sex_Males;Age_Age65andover;EthnicGroup_Otherethnicgroup_Anyotherethnicgroup;measures_Value                      | LA |
| 325 | 240 | Sex_Females;Age_Allcategories_Age;EthnicGroup_Allcategories_Ethnicgroup;measures_Value                          | LA |
| 326 | 241 | Sex_Females;Age_Allcategories_Age;EthnicGroup_White_Total;measures_Value                                        | LA |
| 327 | 242 | Sex_Females;Age_Allcategories_Age;EthnicGroup_White_English/Welsh/Scottish/NorthernIrish/British;measures_Value | LA |
| 328 | 243 | Sex_Females;Age_Allcategories_Age;EthnicGroup_White_Irish;measures_Value                                        | LA |
| 329 | 244 | Sex_Females;Age_Allcategories_Age;EthnicGroup_White_GypsyorIrishTraveller;measures_Value                        | LA |
| 330 | 245 | Sex_Females;Age_Allcategories_Age;EthnicGroup_White_OtherWhite;measures_Value                                   | LA |
| 331 | 246 | Sex_Females;Age_Allcategories_Age;EthnicGroup_Mixed/multipleethnicgroup_Total;measures_Value                    | LA |
| 332 | 247 | Sex_Females;Age_Allcategories_Age;EthnicGroup_Mixed/multipleethnicgroup_WhiteandBlackCaribbean;measures_Value   | LA |
| 333 | 248 | Sex_Females;Age_Allcategories_Age;EthnicGroup_Mixed/multipleethnicgroup_WhiteandBlackAfrican;measures_Value     | LA |
| 334 | 249 | Sex_Females;Age_Allcategories_Age;EthnicGroup_Mixed/multipleethnicgroup_WhiteandAsian;measures_Value            | LA |
| 335 | 250 | Sex_Females;Age_Allcategories_Age;EthnicGroup_Mixed/multipleethnicgroup_OtherMixed;measures_Value               | LA |
| 336 | 251 | Sex_Females;Age_Allcategories_Age;EthnicGroup_Asian/AsianBritish_Total;measures_Value                           | LA |



|     |     |                                                                                                              |    |
|-----|-----|--------------------------------------------------------------------------------------------------------------|----|
| 337 | 252 | Sex_Females;Age_Allcategories_Age;EthnicGroup_Asian/AsianBritish_Indian;measures_Value                       | LA |
| 338 | 253 | Sex_Females;Age_Allcategories_Age;EthnicGroup_Asian/AsianBritish_Pakistani;measures_Value                    | LA |
| 339 | 254 | Sex_Females;Age_Allcategories_Age;EthnicGroup_Asian/AsianBritish_Bangladeshi;measures_Value                  | LA |
| 340 | 255 | Sex_Females;Age_Allcategories_Age;EthnicGroup_Asian/AsianBritish_Chinese;measures_Value                      | LA |
| 341 | 256 | Sex_Females;Age_Allcategories_Age;EthnicGroup_Asian/AsianBritish_OtherAsian;measures_Value                   | LA |
| 342 | 257 | Sex_Females;Age_Allcategories_Age;EthnicGroup_Black/African/Caribbean/BlackBritish_Total;measures_Value      | LA |
| 343 | 258 | Sex_Females;Age_Allcategories_Age;EthnicGroup_Black/African/Caribbean/BlackBritish_African;measures_Value    | LA |
| 344 | 259 | Sex_Females;Age_Allcategories_Age;EthnicGroup_Black/African/Caribbean/BlackBritish_Caribbean;measures_Value  | LA |
| 345 | 260 | Sex_Females;Age_Allcategories_Age;EthnicGroup_Black/African/Caribbean/BlackBritish_OtherBlack;measures_Value | LA |
| 346 | 261 | Sex_Females;Age_Allcategories_Age;EthnicGroup_Otherethnicgroup_Total;measures_Value                          | LA |
| 347 | 262 | Sex_Females;Age_Allcategories_Age;EthnicGroup_Otherethnicgroup_Arab;measures_Value                           | LA |
| 348 | 263 | Sex_Females;Age_Allcategories_Age;EthnicGroup_Otherethnicgroup_Anyotherethnicgroup;measures_Value            | LA |
| 349 | 264 | Sex_Females;Age_Age0to24;EthnicGroup_Allcategories_Ethnicgroup;measures_Value                                | LA |
| 350 | 265 | Sex_Females;Age_Age0to24;EthnicGroup_White_Total;measures_Value                                              | LA |
| 351 | 266 | Sex_Females;Age_Age0to24;EthnicGroup_White_English/Welsh/Scottish/NorthernIrish/British;measures_Value       | LA |
| 352 | 267 | Sex_Females;Age_Age0to24;EthnicGroup_White_Irish;measures_Value                                              | LA |
| 353 | 268 | Sex_Females;Age_Age0to24;EthnicGroup_White_GypsyorIrishTraveller;measures_Value                              | LA |
| 354 | 269 | Sex_Females;Age_Age0to24;EthnicGroup_White_OtherWhite;measures_Value                                         | LA |
| 355 | 270 | Sex_Females;Age_Age0to24;EthnicGroup_Mixed/multipleethnicgroup_Total;measures_Value                          | LA |
| 356 | 271 | Sex_Females;Age_Age0to24;EthnicGroup_Mixed/multipleethnicgroup_WhiteandBlackCaribbean;measures_Value         | LA |
| 357 | 272 | Sex_Females;Age_Age0to24;EthnicGroup_Mixed/multipleethnicgroup_WhiteandBlackAfrican;measures_Value           | LA |
| 358 | 273 | Sex_Females;Age_Age0to24;EthnicGroup_Mixed/multipleethnicgroup_WhiteandAsian;measures_Value                  | LA |
| 359 | 274 | Sex_Females;Age_Age0to24;EthnicGroup_Mixed/multipleethnicgroup_OtherMixed;measures_Value                     | LA |
| 360 | 275 | Sex_Females;Age_Age0to24;EthnicGroup_Asian/AsianBritish_Total;measures_Value                                 | LA |
| 361 | 276 | Sex_Females;Age_Age0to24;EthnicGroup_Asian/AsianBritish_Indian;measures_Value                                | LA |
| 362 | 277 | Sex_Females;Age_Age0to24;EthnicGroup_Asian/AsianBritish_Pakistani;measures_Value                             | LA |
| 363 | 278 | Sex_Females;Age_Age0to24;EthnicGroup_Asian/AsianBritish_Bangladeshi;measures_Value                           | LA |
| 364 | 279 | Sex_Females;Age_Age0to24;EthnicGroup_Asian/AsianBritish_Chinese;measures_Value                               | LA |
| 365 | 280 | Sex_Females;Age_Age0to24;EthnicGroup_Asian/AsianBritish_OtherAsian;measures_Value                            | LA |
| 366 | 281 | Sex_Females;Age_Age0to24;EthnicGroup_Black/African/Caribbean/BlackBritish_Total;measures_Value               | LA |
| 367 | 282 | Sex_Females;Age_Age0to24;EthnicGroup_Black/African/Caribbean/BlackBritish_African;measures_Value             | LA |
| 368 | 283 | Sex_Females;Age_Age0to24;EthnicGroup_Black/African/Caribbean/BlackBritish_Caribbean;measures_Value           | LA |
| 369 | 284 | Sex_Females;Age_Age0to24;EthnicGroup_Black/African/Caribbean/BlackBritish_OtherBlack;measures_Value          | LA |
| 370 | 285 | Sex_Females;Age_Age0to24;EthnicGroup_Otherethnicgroup_Total;measures_Value                                   | LA |
| 371 | 286 | Sex_Females;Age_Age0to24;EthnicGroup_Otherethnicgroup_Arab;measures_Value                                    | LA |
| 372 | 287 | Sex_Females;Age_Age0to24;EthnicGroup_Otherethnicgroup_Anyotherethnicgroup;measures_Value                     | LA |
| 373 | 288 | Sex_Females;Age_Age25to49;EthnicGroup_Allcategories_Ethnicgroup;measures_Value                               | LA |
| 374 | 289 | Sex_Females;Age_Age25to49;EthnicGroup_White_Total;measures_Value                                             | LA |

|     |     |                                                                                                         |    |
|-----|-----|---------------------------------------------------------------------------------------------------------|----|
| 375 | 290 | Sex_Females;Age_Age25to49;EthnicGroup_White_English/Welsh/Scottish/NorthernIrish/British;measures_Value | LA |
| 376 | 291 | Sex_Females;Age_Age25to49;EthnicGroup_White_Irish;measures_Value                                        | LA |
| 377 | 292 | Sex_Females;Age_Age25to49;EthnicGroup_White_GypsyorIrishTraveller;measures_Value                        | LA |
| 378 | 293 | Sex_Females;Age_Age25to49;EthnicGroup_White_OtherWhite;measures_Value                                   | LA |
| 379 | 294 | Sex_Females;Age_Age25to49;EthnicGroup_Mixed/multipleethnicgroup_Total;measures_Value                    | LA |
| 380 | 295 | Sex_Females;Age_Age25to49;EthnicGroup_Mixed/multipleethnicgroup_WhiteandBlackCaribbean;measures_Value   | LA |
| 381 | 296 | Sex_Females;Age_Age25to49;EthnicGroup_Mixed/multipleethnicgroup_WhiteandBlackAfrican;measures_Value     | LA |
| 382 | 297 | Sex_Females;Age_Age25to49;EthnicGroup_Mixed/multipleethnicgroup_WhiteandAsian;measures_Value            | LA |
| 383 | 298 | Sex_Females;Age_Age25to49;EthnicGroup_Mixed/multipleethnicgroup_OtherMixed;measures_Value               | LA |
| 384 | 299 | Sex_Females;Age_Age25to49;EthnicGroup_Asian/AsianBritish_Total;measures_Value                           | LA |
| 385 | 300 | Sex_Females;Age_Age25to49;EthnicGroup_Asian/AsianBritish_Indian;measures_Value                          | LA |
| 386 | 301 | Sex_Females;Age_Age25to49;EthnicGroup_Asian/AsianBritish_Pakistani;measures_Value                       | LA |
| 387 | 302 | Sex_Females;Age_Age25to49;EthnicGroup_Asian/AsianBritish_Bangladeshi;measures_Value                     | LA |
| 388 | 303 | Sex_Females;Age_Age25to49;EthnicGroup_Asian/AsianBritish_Chinese;measures_Value                         | LA |
| 389 | 304 | Sex_Females;Age_Age25to49;EthnicGroup_Asian/AsianBritish_OtherAsian;measures_Value                      | LA |
| 390 | 305 | Sex_Females;Age_Age25to49;EthnicGroup_Black/African/Caribbean/BlackBritish_Total;measures_Value         | LA |
| 391 | 306 | Sex_Females;Age_Age25to49;EthnicGroup_Black/African/Caribbean/BlackBritish_African;measures_Value       | LA |
| 392 | 307 | Sex_Females;Age_Age25to49;EthnicGroup_Black/African/Caribbean/BlackBritish_Caribbean;measures_Value     | LA |
| 393 | 308 | Sex_Females;Age_Age25to49;EthnicGroup_Black/African/Caribbean/BlackBritish_OtherBlack;measures_Value    | LA |
| 394 | 309 | Sex_Females;Age_Age25to49;EthnicGroup_Otherethnicgroup_Total;measures_Value                             | LA |
| 395 | 310 | Sex_Females;Age_Age25to49;EthnicGroup_Otherethnicgroup_Arab;measures_Value                              | LA |
| 396 | 311 | Sex_Females;Age_Age25to49;EthnicGroup_Otherethnicgroup_Anyotherethnicgroup;measures_Value               | LA |
| 397 | 312 | Sex_Females;Age_Age50to64;EthnicGroup_Allcategories_Ethnicgroup;measures_Value                          | LA |
| 398 | 313 | Sex_Females;Age_Age50to64;EthnicGroup_White_Total;measures_Value                                        | LA |
| 399 | 314 | Sex_Females;Age_Age50to64;EthnicGroup_White_English/Welsh/Scottish/NorthernIrish/British;measures_Value | LA |
| 400 | 315 | Sex_Females;Age_Age50to64;EthnicGroup_White_Irish;measures_Value                                        | LA |
| 401 | 316 | Sex_Females;Age_Age50to64;EthnicGroup_White_GypsyorIrishTraveller;measures_Value                        | LA |
| 402 | 317 | Sex_Females;Age_Age50to64;EthnicGroup_White_OtherWhite;measures_Value                                   | LA |
| 403 | 318 | Sex_Females;Age_Age50to64;EthnicGroup_Mixed/multipleethnicgroup_Total;measures_Value                    | LA |
| 404 | 319 | Sex_Females;Age_Age50to64;EthnicGroup_Mixed/multipleethnicgroup_WhiteandBlackCaribbean;measures_Value   | LA |
| 405 | 320 | Sex_Females;Age_Age50to64;EthnicGroup_Mixed/multipleethnicgroup_WhiteandBlackAfrican;measures_Value     | LA |
| 406 | 321 | Sex_Females;Age_Age50to64;EthnicGroup_Mixed/multipleethnicgroup_WhiteandAsian;measures_Value            | LA |
| 407 | 322 | Sex_Females;Age_Age50to64;EthnicGroup_Mixed/multipleethnicgroup_OtherMixed;measures_Value               | LA |
| 408 | 323 | Sex_Females;Age_Age50to64;EthnicGroup_Asian/AsianBritish_Total;measures_Value                           | LA |
| 409 | 324 | Sex_Females;Age_Age50to64;EthnicGroup_Asian/AsianBritish_Indian;measures_Value                          | LA |
| 410 | 325 | Sex_Females;Age_Age50to64;EthnicGroup_Asian/AsianBritish_Pakistani;measures_Value                       | LA |
| 411 | 326 | Sex_Females;Age_Age50to64;EthnicGroup_Asian/AsianBritish_Bangladeshi;measures_Value                     | LA |
| 412 | 327 | Sex_Females;Age_Age50to64;EthnicGroup_Asian/AsianBritish_Chinese;measures_Value                         | LA |

|     |     |                                                                                                                                                                           |    |
|-----|-----|---------------------------------------------------------------------------------------------------------------------------------------------------------------------------|----|
| 413 | 328 | Sex_Females;Age_Age50to64;EthnicGroup_Asian/AsianBritish_OtherAsian;measures_Value                                                                                        | LA |
| 414 | 329 | Sex_Females;Age_Age50to64;EthnicGroup_Black/African/Caribbean/BlackBritish_Total;measures_Value                                                                           | LA |
| 415 | 330 | Sex_Females;Age_Age50to64;EthnicGroup_Black/African/Caribbean/BlackBritish_African;measures_Value                                                                         | LA |
| 416 | 331 | Sex_Females;Age_Age50to64;EthnicGroup_Black/African/Caribbean/BlackBritish_Caribbean;measures_Value                                                                       | LA |
| 417 | 332 | Sex_Females;Age_Age50to64;EthnicGroup_Black/African/Caribbean/BlackBritish_OtherBlack;measures_Value                                                                      | LA |
| 418 | 333 | Sex_Females;Age_Age50to64;EthnicGroup_Otherethnicgroup_Total;measures_Value                                                                                               | LA |
| 419 | 334 | Sex_Females;Age_Age50to64;EthnicGroup_Otherethnicgroup_Arab;measures_Value                                                                                                | LA |
| 420 | 335 | Sex_Females;Age_Age50to64;EthnicGroup_Otherethnicgroup_Anyotherethnicgroup;measures_Value                                                                                 | LA |
| 421 | 336 | Sex_Females;Age_Age65andover;EthnicGroup_Allcategories_Ethnicgroup;measures_Value                                                                                         | LA |
| 422 | 337 | Sex_Females;Age_Age65andover;EthnicGroup_White_Total;measures_Value                                                                                                       | LA |
| 423 | 338 | Sex_Females;Age_Age65andover;EthnicGroup_White_English/Welsh/Scottish/NorthernIrish/British;measures_Value                                                                | LA |
| 424 | 339 | Sex_Females;Age_Age65andover;EthnicGroup_White_Irish;measures_Value                                                                                                       | LA |
| 425 | 340 | Sex_Females;Age_Age65andover;EthnicGroup_White_GypsyorIrishTraveller;measures_Value                                                                                       | LA |
| 426 | 341 | Sex_Females;Age_Age65andover;EthnicGroup_White_OtherWhite;measures_Value                                                                                                  | LA |
| 427 | 342 | Sex_Females;Age_Age65andover;EthnicGroup_Mixed/multipleethnicgroup_Total;measures_Value                                                                                   | LA |
| 428 | 343 | Sex_Females;Age_Age65andover;EthnicGroup_Mixed/multipleethnicgroup_WhiteandBlackCaribbean;measures_Value                                                                  | LA |
| 429 | 344 | Sex_Females;Age_Age65andover;EthnicGroup_Mixed/multipleethnicgroup_WhiteandBlackAfrican;measures_Value                                                                    | LA |
| 430 | 345 | Sex_Females;Age_Age65andover;EthnicGroup_Mixed/multipleethnicgroup_WhiteandAsian;measures_Value                                                                           | LA |
| 431 | 346 | Sex_Females;Age_Age65andover;EthnicGroup_Mixed/multipleethnicgroup_OtherMixed;measures_Value                                                                              | LA |
| 432 | 347 | Sex_Females;Age_Age65andover;EthnicGroup_Asian/AsianBritish_Total;measures_Value                                                                                          | LA |
| 433 | 348 | Sex_Females;Age_Age65andover;EthnicGroup_Asian/AsianBritish_Indian;measures_Value                                                                                         | LA |
| 434 | 349 | Sex_Females;Age_Age65andover;EthnicGroup_Asian/AsianBritish_Pakistani;measures_Value                                                                                      | LA |
| 435 | 350 | Sex_Females;Age_Age65andover;EthnicGroup_Asian/AsianBritish_Bangladeshi;measures_Value                                                                                    | LA |
| 436 | 351 | Sex_Females;Age_Age65andover;EthnicGroup_Asian/AsianBritish_Chinese;measures_Value                                                                                        | LA |
| 437 | 352 | Sex_Females;Age_Age65andover;EthnicGroup_Asian/AsianBritish_OtherAsian;measures_Value                                                                                     | LA |
| 438 | 353 | Sex_Females;Age_Age65andover;EthnicGroup_Black/African/Caribbean/BlackBritish_Total;measures_Value                                                                        | LA |
| 439 | 354 | Sex_Females;Age_Age65andover;EthnicGroup_Black/African/Caribbean/BlackBritish_African;measures_Value                                                                      | LA |
| 440 | 355 | Sex_Females;Age_Age65andover;EthnicGroup_Black/African/Caribbean/BlackBritish_Caribbean;measures_Value                                                                    | LA |
| 441 | 356 | Sex_Females;Age_Age65andover;EthnicGroup_Black/African/Caribbean/BlackBritish_OtherBlack;measures_Value                                                                   | LA |
| 442 | 357 | Sex_Females;Age_Age65andover;EthnicGroup_Otherethnicgroup_Total;measures_Value                                                                                            | LA |
| 443 | 358 | Sex_Females;Age_Age65andover;EthnicGroup_Otherethnicgroup_Arab;measures_Value                                                                                             | LA |
| 444 | 359 | Sex_Females;Age_Age65andover;EthnicGroup_Otherethnicgroup_Anyotherethnicgroup;measures_Value                                                                              | LA |
| 445 | 360 | Familystatus_Allcategories_Familystatusbynumberofparentsworking;Economicactivity_Economicallyactive_Total;measures_Value                                                  | LA |
| 446 | 361 | Familystatus_Allcategories_Familystatusbynumberofparentsworking;Economicactivity_Economicallyactive_Inemployment_Total;measures_Value                                     | LA |
| 447 | 362 | Familystatus_Allcategories_Familystatusbynumberofparentsworking;Economicactivity_Economicallyactive_Inemployment_Employee(includingfull-timestudents);measures_Value      | LA |
| 448 | 363 | Familystatus_Allcategories_Familystatusbynumberofparentsworking;Economicactivity_Economicallyactive_Inemployment_Self-employed(includingfull-timestudents);measures_Value | LA |
| 449 | 364 | Familystatus_Allcategories_Familystatusbynumberofparentsworking;Economicactivity_Economicallyactive_Unemployed(includingfull-timestudents);measures_Value                 | LA |
| 450 | 365 | Familystatus_Allcategories_Familystatusbynumberofparentsworking;Economicactivity_Economicallyinactive_Total;measures_Value                                                | LA |

|     |     |                                                                                                                                                          |    |
|-----|-----|----------------------------------------------------------------------------------------------------------------------------------------------------------|----|
| 451 | 366 | Familystatus_Allcategories_Familystatusbynumberofparentsworking;Economicactivity_Economicallyinactive_Retired;measures_Value                             | LA |
| 452 | 367 | Familystatus_Allcategories_Familystatusbynumberofparentsworking;Economicactivity_Economicallyinactive_Student(includingfull-timestudents);measures_Value | LA |
| 453 | 368 | Familystatus_Allcategories_Familystatusbynumberofparentsworking;Economicactivity_Economicallyinactive_Lookingafterhomeorfamily;measures_Value            | LA |
| 454 | 369 | Familystatus_Allcategories_Familystatusbynumberofparentsworking;Economicactivity_Economicallyinactive_Long-termsickordisabled;measures_Value             | LA |
| 455 | 370 | Familystatus_Allcategories_Familystatusbynumberofparentsworking;Economicactivity_Economicallyinactive_Other;measures_Value                               | LA |
| 456 | 371 | Familystatus_Couplefamily_Total;Economicactivity_Allcategories_Economicactivity;measures_Value                                                           | LA |
| 457 | 372 | Familystatus_Couplefamily_Total;Economicactivity_Economicallyactive_Total;measures_Value                                                                 | LA |
| 458 | 373 | Familystatus_Couplefamily_Total;Economicactivity_Economicallyactive_Inemployment_Total;measures_Value                                                    | LA |
| 459 | 374 | Familystatus_Couplefamily_Total;Economicactivity_Economicallyactive_Inemployment_Employee(includingfull-timestudents);measures_Value                     | LA |
| 460 | 375 | Familystatus_Couplefamily_Total;Economicactivity_Economicallyactive_Inemployment_Self-employed(includingfull-timestudents);measures_Value                | LA |
| 461 | 376 | Familystatus_Couplefamily_Total;Economicactivity_Economicallyactive_Unemployed(includingfull-timestudents);measures_Value                                | LA |
| 462 | 377 | Familystatus_Couplefamily_Total;Economicactivity_Economicallyinactive_Total;measures_Value                                                               | LA |
| 463 | 378 | Familystatus_Couplefamily_Total;Economicactivity_Economicallyinactive_Retired;measures_Value                                                             | LA |
| 464 | 379 | Familystatus_Couplefamily_Total;Economicactivity_Economicallyinactive_Student(includingfull-timestudents);measures_Value                                 | LA |
| 465 | 380 | Familystatus_Couplefamily_Total;Economicactivity_Economicallyinactive_Lookingafterhomeorfamily;measures_Value                                            | LA |
| 466 | 381 | Familystatus_Couplefamily_Total;Economicactivity_Economicallyinactive_Long-termsickordisabled;measures_Value                                             | LA |
| 467 | 382 | Familystatus_Couplefamily_Total;Economicactivity_Economicallyinactive_Other;measures_Value                                                               | LA |
| 468 | 383 | Familystatus_Couplefamily_Bothparentsworking;Economicactivity_Allcategories_Economicactivity;measures_Value                                              | LA |
| 469 | 384 | Familystatus_Couplefamily_Bothparentsworking;Economicactivity_Economicallyactive_Total;measures_Value                                                    | LA |
| 470 | 385 | Familystatus_Couplefamily_Bothparentsworking;Economicactivity_Economicallyactive_Inemployment_Total;measures_Value                                       | LA |
| 471 | 386 | Familystatus_Couplefamily_Bothparentsworking;Economicactivity_Economicallyactive_Inemployment_Employee(includingfull-timestudents);measures_Value        | LA |
| 472 | 387 | Familystatus_Couplefamily_Bothparentsworking;Economicactivity_Economicallyactive_Inemployment_Self-employed(includingfull-timestudents);measures_Value   | LA |
| 473 | 388 | Familystatus_Couplefamily_Bothparentsworking;Economicactivity_Economicallyactive_Unemployed(includingfull-timestudents);measures_Value                   | LA |
| 474 | 389 | Familystatus_Couplefamily_Bothparentsworking;Economicactivity_Economicallyinactive_Total;measures_Value                                                  | LA |
| 475 | 390 | Familystatus_Couplefamily_Bothparentsworking;Economicactivity_Economicallyinactive_Retired;measures_Value                                                | LA |
| 476 | 391 | Familystatus_Couplefamily_Bothparentsworking;Economicactivity_Economicallyinactive_Student(includingfull-timestudents);measures_Value                    | LA |
| 477 | 392 | Familystatus_Couplefamily_Bothparentsworking;Economicactivity_Economicallyinactive_Lookingafterhomeorfamily;measures_Value                               | LA |
| 478 | 393 | Familystatus_Couplefamily_Bothparentsworking;Economicactivity_Economicallyinactive_Long-termsickordisabled;measures_Value                                | LA |
| 479 | 394 | Familystatus_Couplefamily_Bothparentsworking;Economicactivity_Economicallyinactive_Other;measures_Value                                                  | LA |
| 480 | 395 | Familystatus_Couplefamily_Oneparentworking;Economicactivity_Allcategories_Economicactivity;measures_Value                                                | LA |
| 481 | 396 | Familystatus_Couplefamily_Oneparentworking;Economicactivity_Economicallyactive_Total;measures_Value                                                      | LA |
| 482 | 397 | Familystatus_Couplefamily_Oneparentworking;Economicactivity_Economicallyactive_Inemployment_Total;measures_Value                                         | LA |
| 483 | 398 | Familystatus_Couplefamily_Oneparentworking;Economicactivity_Economicallyactive_Inemployment_Employee(includingfull-timestudents);measures_Value          | LA |
| 484 | 399 | Familystatus_Couplefamily_Oneparentworking;Economicactivity_Economicallyactive_Inemployment_Self-employed(includingfull-timestudents);measures_Value     | LA |
| 485 | 400 | Familystatus_Couplefamily_Oneparentworking;Economicactivity_Economicallyactive_Unemployed(includingfull-timestudents);measures_Value                     | LA |
| 486 | 401 | Familystatus_Couplefamily_Oneparentworking;Economicactivity_Economicallyinactive_Total;measures_Value                                                    | LA |
| 487 | 402 | Familystatus_Couplefamily_Oneparentworking;Economicactivity_Economicallyinactive_Retired;measures_Value                                                  | LA |
| 488 | 403 | Familystatus_Couplefamily_Oneparentworking;Economicactivity_Economicallyinactive_Student(includingfull-timestudents);measures_Value                      | LA |

|     |     |                                                                                                                                                       |    |
|-----|-----|-------------------------------------------------------------------------------------------------------------------------------------------------------|----|
| 489 | 404 | Familystatus_Couplefamily_Oneparentworking;Economicactivity_Economicallyinactive_Lookingafterhomeorfamily;measures_Value                              | LA |
| 490 | 405 | Familystatus_Couplefamily_Oneparentworking;Economicactivity_Economicallyinactive_Long-termsickordisabled;measures_Value                               | LA |
| 491 | 406 | Familystatus_Couplefamily_Oneparentworking;Economicactivity_Economicallyinactive_Other;measures_Value                                                 | LA |
| 492 | 407 | Familystatus_Couplefamily_Noparentsworking;Economicactivity_Allcategories_Economicactivity;measures_Value                                             | LA |
| 493 | 408 | Familystatus_Couplefamily_Noparentsworking;Economicactivity_Economicallyactive_Total;measures_Value                                                   | LA |
| 494 | 409 | Familystatus_Couplefamily_Noparentsworking;Economicactivity_Economicallyactive_Inemployment_Total;measures_Value                                      | LA |
| 495 | 410 | Familystatus_Couplefamily_Noparentsworking;Economicactivity_Economicallyactive_Inemployment_Employee(includingfull-timestudents);measures_Value       | LA |
| 496 | 411 | Familystatus_Couplefamily_Noparentsworking;Economicactivity_Economicallyactive_Inemployment_Self-employed(includingfull-timestudents);measures_Value  | LA |
| 497 | 412 | Familystatus_Couplefamily_Noparentsworking;Economicactivity_Economicallyactive_Unemployed(includingfull-timestudents);measures_Value                  | LA |
| 498 | 413 | Familystatus_Couplefamily_Noparentsworking;Economicactivity_Economicallyinactive_Total;measures_Value                                                 | LA |
| 499 | 414 | Familystatus_Couplefamily_Noparentsworking;Economicactivity_Economicallyinactive_Retired;measures_Value                                               | LA |
| 500 | 415 | Familystatus_Couplefamily_Noparentsworking;Economicactivity_Economicallyinactive_Student(includingfull-timestudents);measures_Value                   | LA |
| 501 | 416 | Familystatus_Couplefamily_Noparentsworking;Economicactivity_Economicallyinactive_Lookingafterhomeorfamily;measures_Value                              | LA |
| 502 | 417 | Familystatus_Couplefamily_Noparentsworking;Economicactivity_Economicallyinactive_Long-termsickordisabled;measures_Value                               | LA |
| 503 | 418 | Familystatus_Couplefamily_Noparentsworking;Economicactivity_Economicallyinactive_Other;measures_Value                                                 | LA |
| 504 | 419 | Familystatus_Loneparentfamily_Total;Economicactivity_Allcategories_Economicactivity;measures_Value                                                    | LA |
| 505 | 420 | Familystatus_Loneparentfamily_Total;Economicactivity_Economicallyactive_Total;measures_Value                                                          | LA |
| 506 | 421 | Familystatus_Loneparentfamily_Total;Economicactivity_Economicallyactive_Inemployment_Total;measures_Value                                             | LA |
| 507 | 422 | Familystatus_Loneparentfamily_Total;Economicactivity_Economicallyactive_Inemployment_Employee(includingfull-timestudents);measures_Value              | LA |
| 508 | 423 | Familystatus_Loneparentfamily_Total;Economicactivity_Economicallyactive_Inemployment_Self-employed(includingfull-timestudents);measures_Value         | LA |
| 509 | 424 | Familystatus_Loneparentfamily_Total;Economicactivity_Economicallyactive_Unemployed(includingfull-timestudents);measures_Value                         | LA |
| 510 | 425 | Familystatus_Loneparentfamily_Total;Economicactivity_Economicallyinactive_Total;measures_Value                                                        | LA |
| 511 | 426 | Familystatus_Loneparentfamily_Total;Economicactivity_Economicallyinactive_Retired;measures_Value                                                      | LA |
| 512 | 427 | Familystatus_Loneparentfamily_Total;Economicactivity_Economicallyinactive_Student(includingfull-timestudents);measures_Value                          | LA |
| 513 | 428 | Familystatus_Loneparentfamily_Total;Economicactivity_Economicallyinactive_Lookingafterhomeorfamily;measures_Value                                     | LA |
| 514 | 429 | Familystatus_Loneparentfamily_Total;Economicactivity_Economicallyinactive_Long-termsickordisabled;measures_Value                                      | LA |
| 515 | 430 | Familystatus_Loneparentfamily_Total;Economicactivity_Economicallyinactive_Other;measures_Value                                                        | LA |
| 516 | 431 | Familystatus_Loneparentfamily_Parentworking;Economicactivity_Allcategories_Economicactivity;measures_Value                                            | LA |
| 517 | 432 | Familystatus_Loneparentfamily_Parentworking;Economicactivity_Economicallyactive_Total;measures_Value                                                  | LA |
| 518 | 433 | Familystatus_Loneparentfamily_Parentworking;Economicactivity_Economicallyactive_Inemployment_Total;measures_Value                                     | LA |
| 519 | 434 | Familystatus_Loneparentfamily_Parentworking;Economicactivity_Economicallyactive_Inemployment_Employee(includingfull-timestudents);measures_Value      | LA |
| 520 | 435 | Familystatus_Loneparentfamily_Parentworking;Economicactivity_Economicallyactive_Inemployment_Self-employed(includingfull-timestudents);measures_Value | LA |
| 521 | 436 | Familystatus_Loneparentfamily_Parentworking;Economicactivity_Economicallyactive_Unemployed(includingfull-timestudents);measures_Value                 | LA |
| 522 | 437 | Familystatus_Loneparentfamily_Parentworking;Economicactivity_Economicallyinactive_Total;measures_Value                                                | LA |
| 523 | 438 | Familystatus_Loneparentfamily_Parentworking;Economicactivity_Economicallyinactive_Retired;measures_Value                                              | LA |
| 524 | 439 | Familystatus_Loneparentfamily_Parentworking;Economicactivity_Economicallyinactive_Student(includingfull-timestudents);measures_Value                  | LA |
| 525 | 440 | Familystatus_Loneparentfamily_Parentworking;Economicactivity_Economicallyinactive_Lookingafterhomeorfamily;measures_Value                             | LA |
| 526 | 441 | Familystatus_Loneparentfamily_Parentworking;Economicactivity_Economicallyinactive_Long-termsickordisabled;measures_Value                              | LA |

|     |     |                                                                                                                                                          |    |
|-----|-----|----------------------------------------------------------------------------------------------------------------------------------------------------------|----|
| 527 | 442 | Familystatus_Loneparentfamily_Parentworking;Economicactivity_Economicallyinactive_Other;measures_Value                                                   | LA |
| 528 | 443 | Familystatus_Loneparentfamily_Parentnotworking;Economicactivity_Allcategories_Economicactivity;measures_Value                                            | LA |
| 529 | 444 | Familystatus_Loneparentfamily_Parentnotworking;Economicactivity_Economicallyactive_Total;measures_Value                                                  | LA |
| 530 | 445 | Familystatus_Loneparentfamily_Parentnotworking;Economicactivity_Economicallyactive_Inemployment_Total;measures_Value                                     | LA |
| 531 | 446 | Familystatus_Loneparentfamily_Parentnotworking;Economicactivity_Economicallyactive_Inemployment_Employee(includingfull-timestudents);measures_Value      | LA |
| 532 | 447 | Familystatus_Loneparentfamily_Parentnotworking;Economicactivity_Economicallyactive_Inemployment_Self-employed(includingfull-timestudents);measures_Value | LA |
| 533 | 448 | Familystatus_Loneparentfamily_Parentnotworking;Economicactivity_Economicallyactive_Unemployed(includingfull-timestudents);measures_Value                 | LA |
| 534 | 449 | Familystatus_Loneparentfamily_Parentnotworking;Economicactivity_Economicallyinactive_Total;measures_Value                                                | LA |
| 535 | 450 | Familystatus_Loneparentfamily_Parentnotworking;Economicactivity_Economicallyinactive_Retired;measures_Value                                              | LA |
| 536 | 451 | Familystatus_Loneparentfamily_Parentnotworking;Economicactivity_Economicallyinactive_Student(includingfull-timestudents);measures_Value                  | LA |
| 537 | 452 | Familystatus_Loneparentfamily_Parentnotworking;Economicactivity_Economicallyinactive_Lookingafterhomeorfamily;measures_Value                             | LA |
| 538 | 453 | Familystatus_Loneparentfamily_Parentnotworking;Economicactivity_Economicallyinactive_Long-termsickordisabled;measures_Value                              | LA |
| 539 | 454 | Familystatus_Loneparentfamily_Parentnotworking;Economicactivity_Economicallyinactive_Other;measures_Value                                                | LA |
| 540 | 455 | disability/health/care_Allcategories_Long-termhealthproblemordisability;measures_Value                                                                   | LA |
| 541 | 456 | disability/health/care_Allcategories_Long-termhealthproblemordisability;measures_Percent                                                                 | LA |
| 542 | 457 | disability/health/care_Day-to-dayactivitieslimitedalot;measures_Value                                                                                    | LA |
| 543 | 458 | disability/health/care_Day-to-dayactivitieslimitedalot;measures_Percent                                                                                  | LA |
| 544 | 459 | disability/health/care_Day-to-dayactivitieslimitedalittle;measures_Value                                                                                 | LA |
| 545 | 460 | disability/health/care_Day-to-dayactivitieslimitedalittle;measures_Percent                                                                               | LA |
| 546 | 461 | disability/health/care_Day-to-dayactivitiesnotlimited;measures_Value                                                                                     | LA |
| 547 | 462 | disability/health/care_Day-to-dayactivitiesnotlimited;measures_Percent                                                                                   | LA |
| 548 | 463 | disability/health/care_Day-to-dayactivitieslimitedalot_Age16to64;measures_Value                                                                          | LA |
| 549 | 464 | disability/health/care_Day-to-dayactivitieslimitedalot_Age16to64;measures_Percent                                                                        | LA |
| 550 | 465 | disability/health/care_Day-to-dayactivitieslimitedalittle_Age16to64;measures_Value                                                                       | LA |
| 551 | 466 | disability/health/care_Day-to-dayactivitieslimitedalittle_Age16to64;measures_Percent                                                                     | LA |
| 552 | 467 | disability/health/care_Day-to-dayactivitiesnotlimited_Age16to64;measures_Value                                                                           | LA |
| 553 | 468 | disability/health/care_Day-to-dayactivitiesnotlimited_Age16to64;measures_Percent                                                                         | LA |
| 554 | 469 | disability/health/care_Verygoodhealth;measures_Value                                                                                                     | LA |
| 555 | 470 | disability/health/care_Verygoodhealth;measures_Percent                                                                                                   | LA |
| 556 | 471 | disability/health/care_Goodhealth;measures_Value                                                                                                         | LA |
| 557 | 472 | disability/health/care_Goodhealth;measures_Percent                                                                                                       | LA |
| 558 | 473 | disability/health/care_Fairhealth;measures_Value                                                                                                         | LA |
| 559 | 474 | disability/health/care_Fairhealth;measures_Percent                                                                                                       | LA |
| 560 | 475 | disability/health/care_Badhealth;measures_Value                                                                                                          | LA |
| 561 | 476 | disability/health/care_Badhealth;measures_Percent                                                                                                        | LA |
| 562 | 477 | disability/health/care_Verybadhealth;measures_Value                                                                                                      | LA |
| 563 | 478 | disability/health/care_Verybadhealth;measures_Percent                                                                                                    | LA |
| 564 | 479 | disability/health/care_Providesnounpaidcare;measures_Value                                                                                               | LA |

|     |     |                                                                                                                                            |    |
|-----|-----|--------------------------------------------------------------------------------------------------------------------------------------------|----|
| 565 | 480 | disability/health/care_Providesnounpaidcare;measures_Percent                                                                               | LA |
| 566 | 481 | disability/health/care_Provides1to19hoursunpaidcareaweek;measures_Value                                                                    | LA |
| 567 | 482 | disability/health/care_Provides1to19hoursunpaidcareaweek;measures_Percent                                                                  | LA |
| 568 | 483 | disability/health/care_Provides20to49hoursunpaidcareaweek;measures_Value                                                                   | LA |
| 569 | 484 | disability/health/care_Provides20to49hoursunpaidcareaweek;measures_Percent                                                                 | LA |
| 570 | 485 | disability/health/care_Provides50ormorehoursunpaidcareaweek;measures_Value                                                                 | LA |
| 571 | 486 | disability/health/care_Provides50ormorehoursunpaidcareaweek;measures_Percent                                                               | LA |
| 572 | 487 | HouseholdComposition_Allcategories_Householdcomposition;EthnicGroupofHRP_White_Total;measures_Value                                        | LA |
| 573 | 488 | HouseholdComposition_Allcategories_Householdcomposition;EthnicGroupofHRP_White_English/Welsh/Scottish/NorthernIrish/British;measures_Value | LA |
| 574 | 489 | HouseholdComposition_Allcategories_Householdcomposition;EthnicGroupofHRP_White_Irish;measures_Value                                        | LA |
| 575 | 490 | HouseholdComposition_Allcategories_Householdcomposition;EthnicGroupofHRP_White_OtherWhite;measures_Value                                   | LA |
| 576 | 491 | HouseholdComposition_Allcategories_Householdcomposition;EthnicGroupofHRP_Mixed/multipleethnicgroup;measures_Value                          | LA |
| 577 | 492 | HouseholdComposition_Allcategories_Householdcomposition;EthnicGroupofHRP_Asian/AsianBritish;measures_Value                                 | LA |
| 578 | 493 | HouseholdComposition_Allcategories_Householdcomposition;EthnicGroupofHRP_Black/African/Caribbean/BlackBritish;measures_Value               | LA |
| 579 | 494 | HouseholdComposition_Allcategories_Householdcomposition;EthnicGroupofHRP_Otherethnicgroup;measures_Value                                   | LA |
| 580 | 495 | HouseholdComposition_Onepersonhousehold;EthnicGroupofHRP_Allcategories_EthnicgroupofHRP;measures_Value                                     | LA |
| 581 | 496 | HouseholdComposition_Onepersonhousehold;EthnicGroupofHRP_White_Total;measures_Value                                                        | LA |
| 582 | 497 | HouseholdComposition_Onepersonhousehold;EthnicGroupofHRP_White_English/Welsh/Scottish/NorthernIrish/British;measures_Value                 | LA |
| 583 | 498 | HouseholdComposition_Onepersonhousehold;EthnicGroupofHRP_White_Irish;measures_Value                                                        | LA |
| 584 | 499 | HouseholdComposition_Onepersonhousehold;EthnicGroupofHRP_White_OtherWhite;measures_Value                                                   | LA |
| 585 | 500 | HouseholdComposition_Onepersonhousehold;EthnicGroupofHRP_Mixed/multipleethnicgroup;measures_Value                                          | LA |
| 586 | 501 | HouseholdComposition_Onepersonhousehold;EthnicGroupofHRP_Asian/AsianBritish;measures_Value                                                 | LA |
| 587 | 502 | HouseholdComposition_Onepersonhousehold;EthnicGroupofHRP_Black/African/Caribbean/BlackBritish;measures_Value                               | LA |
| 588 | 503 | HouseholdComposition_Onepersonhousehold;EthnicGroupofHRP_Otherethnicgroup;measures_Value                                                   | LA |
| 589 | 504 | HouseholdComposition_Onefamilyonly_Total;EthnicGroupofHRP_Allcategories_EthnicgroupofHRP;measures_Value                                    | LA |
| 590 | 505 | HouseholdComposition_Onefamilyonly_Total;EthnicGroupofHRP_White_Total;measures_Value                                                       | LA |
| 591 | 506 | HouseholdComposition_Onefamilyonly_Total;EthnicGroupofHRP_White_English/Welsh/Scottish/NorthernIrish/British;measures_Value                | LA |
| 592 | 507 | HouseholdComposition_Onefamilyonly_Total;EthnicGroupofHRP_White_Irish;measures_Value                                                       | LA |
| 593 | 508 | HouseholdComposition_Onefamilyonly_Total;EthnicGroupofHRP_White_OtherWhite;measures_Value                                                  | LA |
| 594 | 509 | HouseholdComposition_Onefamilyonly_Total;EthnicGroupofHRP_Mixed/multipleethnicgroup;measures_Value                                         | LA |
| 595 | 510 | HouseholdComposition_Onefamilyonly_Total;EthnicGroupofHRP_Asian/AsianBritish;measures_Value                                                | LA |
| 596 | 511 | HouseholdComposition_Onefamilyonly_Total;EthnicGroupofHRP_Black/African/Caribbean/BlackBritish;measures_Value                              | LA |
| 597 | 512 | HouseholdComposition_Onefamilyonly_Total;EthnicGroupofHRP_Otherethnicgroup;measures_Value                                                  | LA |
| 598 | 513 | HouseholdComposition_Onefamilyonly_Allaged65andover;EthnicGroupofHRP_Allcategories_EthnicgroupofHRP;measures_Value                         | LA |
| 599 | 514 | HouseholdComposition_Onefamilyonly_Allaged65andover;EthnicGroupofHRP_White_Total;measures_Value                                            | LA |
| 600 | 515 | HouseholdComposition_Onefamilyonly_Allaged65andover;EthnicGroupofHRP_White_English/Welsh/Scottish/NorthernIrish/British;measures_Value     | LA |
| 601 | 516 | HouseholdComposition_Onefamilyonly_Allaged65andover;EthnicGroupofHRP_White_Irish;measures_Value                                            | LA |
| 602 | 517 | HouseholdComposition_Onefamilyonly_Allaged65andover;EthnicGroupofHRP_White_OtherWhite;measures_Value                                       | LA |

|     |     |                                                                                                                                                                          |    |
|-----|-----|--------------------------------------------------------------------------------------------------------------------------------------------------------------------------|----|
| 603 | 518 | HouseholdComposition_Onefamilyonly_Allaged65andover;EthnicGroupofHRP_Mixed/multipleethnicgroup;measures_Value                                                            | LA |
| 604 | 519 | HouseholdComposition_Onefamilyonly_Allaged65andover;EthnicGroupofHRP_Asian/AsianBritish;measures_Value                                                                   | LA |
| 605 | 520 | HouseholdComposition_Onefamilyonly_Allaged65andover;EthnicGroupofHRP_Black/African/Caribbean/BlackBritish;measures_Value                                                 | LA |
| 606 | 521 | HouseholdComposition_Onefamilyonly_Allaged65andover;EthnicGroupofHRP_Otherethnicgroup;measures_Value                                                                     | LA |
| 607 | 522 | HouseholdComposition_Onefamilyonly_Married,same-sexcivilpartnershiporcohabitingcouple;EthnicGroupofHRP_Allcategories_EthnicgroupofHRP;measures_Value                     | LA |
| 608 | 523 | HouseholdComposition_Onefamilyonly_Married,same-sexcivilpartnershiporcohabitingcouple;EthnicGroupofHRP_White_Total;measures_Value                                        | LA |
| 609 | 524 | HouseholdComposition_Onefamilyonly_Married,same-sexcivilpartnershiporcohabitingcouple;EthnicGroupofHRP_White_English/Welsh/Scottish/NorthernIrish/British;measures_Value | LA |
| 610 | 525 | HouseholdComposition_Onefamilyonly_Married,same-sexcivilpartnershiporcohabitingcouple;EthnicGroupofHRP_White_Irish;measures_Value                                        | LA |
| 611 | 526 | HouseholdComposition_Onefamilyonly_Married,same-sexcivilpartnershiporcohabitingcouple;EthnicGroupofHRP_White_OtherWhite;measures_Value                                   | LA |
| 612 | 527 | HouseholdComposition_Onefamilyonly_Married,same-sexcivilpartnershiporcohabitingcouple;EthnicGroupofHRP_Mixed/multipleethnicgroup;measures_Value                          | LA |
| 613 | 528 | HouseholdComposition_Onefamilyonly_Married,same-sexcivilpartnershiporcohabitingcouple;EthnicGroupofHRP_Asian/AsianBritish;measures_Value                                 | LA |
| 614 | 529 | HouseholdComposition_Onefamilyonly_Married,same-sexcivilpartnershiporcohabitingcouple;EthnicGroupofHRP_Black/African/Caribbean/BlackBritish;measures_Value               | LA |
| 615 | 530 | HouseholdComposition_Onefamilyonly_Married,same-sexcivilpartnershiporcohabitingcouple;EthnicGroupofHRP_Otherethnicgroup;measures_Value                                   | LA |
| 616 | 531 | HouseholdComposition_Onefamilyonly_Loneparent;EthnicGroupofHRP_Allcategories_EthnicgroupofHRP;measures_Value                                                             | LA |
| 617 | 532 | HouseholdComposition_Onefamilyonly_Loneparent;EthnicGroupofHRP_White_Total;measures_Value                                                                                | LA |
| 618 | 533 | HouseholdComposition_Onefamilyonly_Loneparent;EthnicGroupofHRP_White_English/Welsh/Scottish/NorthernIrish/British;measures_Value                                         | LA |
| 619 | 534 | HouseholdComposition_Onefamilyonly_Loneparent;EthnicGroupofHRP_White_Irish;measures_Value                                                                                | LA |
| 620 | 535 | HouseholdComposition_Onefamilyonly_Loneparent;EthnicGroupofHRP_White_OtherWhite;measures_Value                                                                           | LA |
| 621 | 536 | HouseholdComposition_Onefamilyonly_Loneparent;EthnicGroupofHRP_Mixed/multipleethnicgroup;measures_Value                                                                  | LA |
| 622 | 537 | HouseholdComposition_Onefamilyonly_Loneparent;EthnicGroupofHRP_Asian/AsianBritish;measures_Value                                                                         | LA |
| 623 | 538 | HouseholdComposition_Onefamilyonly_Loneparent;EthnicGroupofHRP_Black/African/Caribbean/BlackBritish;measures_Value                                                       | LA |
| 624 | 539 | HouseholdComposition_Onefamilyonly_Loneparent;EthnicGroupofHRP_Otherethnicgroup;measures_Value                                                                           | LA |
| 625 | 540 | HouseholdComposition_Otherhouseholdtypes;EthnicGroupofHRP_Allcategories_EthnicgroupofHRP;measures_Value                                                                  | LA |
| 626 | 541 | HouseholdComposition_Otherhouseholdtypes;EthnicGroupofHRP_White_Total;measures_Value                                                                                     | LA |
| 627 | 542 | HouseholdComposition_Otherhouseholdtypes;EthnicGroupofHRP_White_English/Welsh/Scottish/NorthernIrish/British;measures_Value                                              | LA |
| 628 | 543 | HouseholdComposition_Otherhouseholdtypes;EthnicGroupofHRP_White_Irish;measures_Value                                                                                     | LA |
| 629 | 544 | HouseholdComposition_Otherhouseholdtypes;EthnicGroupofHRP_White_OtherWhite;measures_Value                                                                                | LA |
| 630 | 545 | HouseholdComposition_Otherhouseholdtypes;EthnicGroupofHRP_Mixed/multipleethnicgroup;measures_Value                                                                       | LA |
| 631 | 546 | HouseholdComposition_Otherhouseholdtypes;EthnicGroupofHRP_Asian/AsianBritish;measures_Value                                                                              | LA |
| 632 | 547 | HouseholdComposition_Otherhouseholdtypes;EthnicGroupofHRP_Black/African/Caribbean/BlackBritish;measures_Value                                                            | LA |
| 633 | 548 | HouseholdComposition_Otherhouseholdtypes;EthnicGroupofHRP_Otherethnicgroup;measures_Value                                                                                | LA |
| 634 | 549 | Age_Allcategories_Age;livingarrangements_Livinginacouple_Total;measures_Value                                                                                            | LA |
| 635 | 550 | Age_Allcategories_Age;livingarrangements_Livinginacouple_Marriedorinregisteredsame-sexcivilpartnership;measures_Value                                                    | LA |
| 636 | 551 | Age_Allcategories_Age;livingarrangements_Livinginacouple_Cohabiting;measures_Value                                                                                       | LA |
| 637 | 552 | Age_Allcategories_Age;livingarrangements_Notlivinginacouple_Total;measures_Value                                                                                         | LA |
| 638 | 553 | Age_Allcategories_Age;livingarrangements_Notlivinginacouple_Single(nevermarriedorneverregisteredasame-sexcivilpartnership);measures_Value                                | LA |
| 639 | 554 | Age_Allcategories_Age;livingarrangements_Notlivinginacouple_Marriedorinregisteredsame-sexcivilpartnership;measures_Value                                                 | LA |
| 640 | 555 | Age_Allcategories_Age;livingarrangements_Notlivinginacouple_Separated(butstilllegallymarriedorstilllegallyinasame-sexcivilpartnership);measures_Value                    | LA |



|     |     |                                                                                                                                                    |    |
|-----|-----|----------------------------------------------------------------------------------------------------------------------------------------------------|----|
| 641 | 556 | Age_Allcategories_Age;livingarrangements_Notlivinginacouple_Divorcedorformerlyinasame-sexcivilpartnershipwhichisnowlegallydissolved;measures_Value | LA |
| 642 | 557 | Age_Allcategories_Age;livingarrangements_Notlivinginacouple_Widowedorsurvivingpartnerfromasame-sexcivilpartnership;measures_Value                  | LA |
| 643 | 558 | Age_Age24andunder;livingarrangements_Allcategories_Livingarrangements;measures_Value                                                               | LA |
| 644 | 559 | Age_Age24andunder;livingarrangements_Livinginacouple_Total;measures_Value                                                                          | LA |
| 645 | 560 | Age_Age24andunder;livingarrangements_Livinginacouple_Marriedorinaregisteredsame-sexcivilpartnership;measures_Value                                 | LA |
| 646 | 561 | Age_Age24andunder;livingarrangements_Livinginacouple_Cohabiting;measures_Value                                                                     | LA |
| 647 | 562 | Age_Age24andunder;livingarrangements_Notlivinginacouple_Total;measures_Value                                                                       | LA |
| 648 | 563 | Age_Age24andunder;livingarrangements_Notlivinginacouple_Single(nevermarriedorneverregisteredasame-sexcivilpartnership);measures_Value              | LA |
| 649 | 564 | Age_Age24andunder;livingarrangements_Notlivinginacouple_Marriedorinaregisteredsame-sexcivilpartnership;measures_Value                              | LA |
| 650 | 565 | Age_Age24andunder;livingarrangements_Notlivinginacouple_Separated(butstilllegallymarriedorstilllegallyinasame-sexcivilpartnership);measures_Value  | LA |
| 651 | 566 | Age_Age24andunder;livingarrangements_Notlivinginacouple_Divorcedorformerlyinasame-sexcivilpartnershipwhichisnowlegallydissolved;measures_Value     | LA |
| 652 | 567 | Age_Age24andunder;livingarrangements_Notlivinginacouple_Widowedorsurvivingpartnerfromasame-sexcivilpartnership;measures_Value                      | LA |
| 653 | 568 | Age_Age25to34;livingarrangements_Allcategories_Livingarrangements;measures_Value                                                                   | LA |
| 654 | 569 | Age_Age25to34;livingarrangements_Livinginacouple_Total;measures_Value                                                                              | LA |
| 655 | 570 | Age_Age25to34;livingarrangements_Livinginacouple_Marriedorinaregisteredsame-sexcivilpartnership;measures_Value                                     | LA |
| 656 | 571 | Age_Age25to34;livingarrangements_Livinginacouple_Cohabiting;measures_Value                                                                         | LA |
| 657 | 572 | Age_Age25to34;livingarrangements_Notlivinginacouple_Total;measures_Value                                                                           | LA |
| 658 | 573 | Age_Age25to34;livingarrangements_Notlivinginacouple_Single(nevermarriedorneverregisteredasame-sexcivilpartnership);measures_Value                  | LA |
| 659 | 574 | Age_Age25to34;livingarrangements_Notlivinginacouple_Marriedorinaregisteredsame-sexcivilpartnership;measures_Value                                  | LA |
| 660 | 575 | Age_Age25to34;livingarrangements_Notlivinginacouple_Separated(butstilllegallymarriedorstilllegallyinasame-sexcivilpartnership);measures_Value      | LA |
| 661 | 576 | Age_Age25to34;livingarrangements_Notlivinginacouple_Divorcedorformerlyinasame-sexcivilpartnershipwhichisnowlegallydissolved;measures_Value         | LA |
| 662 | 577 | Age_Age25to34;livingarrangements_Notlivinginacouple_Widowedorsurvivingpartnerfromasame-sexcivilpartnership;measures_Value                          | LA |
| 663 | 578 | Age_Age35to49;livingarrangements_Allcategories_Livingarrangements;measures_Value                                                                   | LA |
| 664 | 579 | Age_Age35to49;livingarrangements_Livinginacouple_Total;measures_Value                                                                              | LA |
| 665 | 580 | Age_Age35to49;livingarrangements_Livinginacouple_Marriedorinaregisteredsame-sexcivilpartnership;measures_Value                                     | LA |
| 666 | 581 | Age_Age35to49;livingarrangements_Livinginacouple_Cohabiting;measures_Value                                                                         | LA |
| 667 | 582 | Age_Age35to49;livingarrangements_Notlivinginacouple_Total;measures_Value                                                                           | LA |
| 668 | 583 | Age_Age35to49;livingarrangements_Notlivinginacouple_Single(nevermarriedorneverregisteredasame-sexcivilpartnership);measures_Value                  | LA |
| 669 | 584 | Age_Age35to49;livingarrangements_Notlivinginacouple_Marriedorinaregisteredsame-sexcivilpartnership;measures_Value                                  | LA |
| 670 | 585 | Age_Age35to49;livingarrangements_Notlivinginacouple_Separated(butstilllegallymarriedorstilllegallyinasame-sexcivilpartnership);measures_Value      | LA |
| 671 | 586 | Age_Age35to49;livingarrangements_Notlivinginacouple_Divorcedorformerlyinasame-sexcivilpartnershipwhichisnowlegallydissolved;measures_Value         | LA |
| 672 | 587 | Age_Age35to49;livingarrangements_Notlivinginacouple_Widowedorsurvivingpartnerfromasame-sexcivilpartnership;measures_Value                          | LA |
| 673 | 588 | Age_Age50to64;livingarrangements_Allcategories_Livingarrangements;measures_Value                                                                   | LA |
| 674 | 589 | Age_Age50to64;livingarrangements_Livinginacouple_Total;measures_Value                                                                              | LA |
| 675 | 590 | Age_Age50to64;livingarrangements_Livinginacouple_Marriedorinaregisteredsame-sexcivilpartnership;measures_Value                                     | LA |
| 676 | 591 | Age_Age50to64;livingarrangements_Livinginacouple_Cohabiting;measures_Value                                                                         | LA |
| 677 | 592 | Age_Age50to64;livingarrangements_Notlivinginacouple_Total;measures_Value                                                                           | LA |
| 678 | 593 | Age_Age50to64;livingarrangements_Notlivinginacouple_Single(nevermarriedorneverregisteredasame-sexcivilpartnership);measures_Value                  | LA |

|     |     |                                                                                                                                                  |    |
|-----|-----|--------------------------------------------------------------------------------------------------------------------------------------------------|----|
| 679 | 594 | Age_Age50to64;livingarrangements_Notlivinginacouple_Marriedorinaregisteredsame-sexcivilpartnership;measures_Value                                | LA |
| 680 | 595 | Age_Age50to64;livingarrangements_Notlivinginacouple_Separated(butstilllegallymarriedorstilllegallyinasame-sexcivilpartnership);measures_Value    | LA |
| 681 | 596 | Age_Age50to64;livingarrangements_Notlivinginacouple_Divorcedorformerlyinasame-sexcivilpartnershipwhichisnowlegallydissolved;measures_Value       | LA |
| 682 | 597 | Age_Age50to64;livingarrangements_Notlivinginacouple_Widowedorsurvivingpartnerfromasame-sexcivilpartnership;measures_Value                        | LA |
| 683 | 598 | Age_Age65andover;livingarrangements_Allcategories_Livingarrangements;measures_Value                                                              | LA |
| 684 | 599 | Age_Age65andover;livingarrangements_Livinginacouple_Total;measures_Value                                                                         | LA |
| 685 | 600 | Age_Age65andover;livingarrangements_Livinginacouple_Marriedorinaregisteredsame-sexcivilpartnership;measures_Value                                | LA |
| 686 | 601 | Age_Age65andover;livingarrangements_Livinginacouple_Cohabiting;measures_Value                                                                    | LA |
| 687 | 602 | Age_Age65andover;livingarrangements_Notlivinginacouple_Total;measures_Value                                                                      | LA |
| 688 | 603 | Age_Age65andover;livingarrangements_Notlivinginacouple_Single(nevermarriedorneverregisteredasame-sexcivilpartnership);measures_Value             | LA |
| 689 | 604 | Age_Age65andover;livingarrangements_Notlivinginacouple_Marriedorinaregisteredsame-sexcivilpartnership;measures_Value                             | LA |
| 690 | 605 | Age_Age65andover;livingarrangements_Notlivinginacouple_Separated(butstilllegallymarriedorstilllegallyinasame-sexcivilpartnership);measures_Value | LA |
| 691 | 606 | Age_Age65andover;livingarrangements_Notlivinginacouple_Divorcedorformerlyinasame-sexcivilpartnershipwhichisnowlegallydissolved;measures_Value    | LA |
| 692 | 607 | Age_Age65andover;livingarrangements_Notlivinginacouple_Widowedorsurvivingpartnerfromasame-sexcivilpartnership;measures_Value                     | LA |
| 693 | 608 | RuralUrban                                                                                                                                       | LA |
| 694 | 609 | Qualifications_Allcategories_Highestlevelofqualification;measures_Value                                                                          | LA |
| 695 | 610 | Qualifications_Allcategories_Highestlevelofqualification;measures_Percent                                                                        | LA |
| 696 | 611 | Qualifications_Noqualifications;measures_Value                                                                                                   | LA |
| 697 | 612 | Qualifications_Noqualifications;measures_Percent                                                                                                 | LA |
| 698 | 613 | Qualifications_Highestlevelofqualification_Level1qualifications;measures_Value                                                                   | LA |
| 699 | 614 | Qualifications_Highestlevelofqualification_Level1qualifications;measures_Percent                                                                 | LA |
| 700 | 615 | Qualifications_Highestlevelofqualification_Level2qualifications;measures_Value                                                                   | LA |
| 701 | 616 | Qualifications_Highestlevelofqualification_Level2qualifications;measures_Percent                                                                 | LA |
| 702 | 617 | Qualifications_Highestlevelofqualification_Apprenticeship;measures_Value                                                                         | LA |
| 703 | 618 | Qualifications_Highestlevelofqualification_Apprenticeship;measures_Percent                                                                       | LA |
| 704 | 619 | Qualifications_Highestlevelofqualification_Level3qualifications;measures_Value                                                                   | LA |
| 705 | 620 | Qualifications_Highestlevelofqualification_Level3qualifications;measures_Percent                                                                 | LA |
| 706 | 621 | Qualifications_Highestlevelofqualification_Level4qualificationsandabove;measures_Value                                                           | LA |
| 707 | 622 | Qualifications_Highestlevelofqualification_Level4qualificationsandabove;measures_Percent                                                         | LA |
| 708 | 623 | Qualifications_Highestlevelofqualification_Otherqualifications;measures_Value                                                                    | LA |
| 709 | 624 | Qualifications_Highestlevelofqualification_Otherqualifications;measures_Percent                                                                  | LA |
| 710 | 625 | Qualifications_Schoolchildrenandfull-timestudents_Age16to17;measures_Value                                                                       | LA |
| 711 | 626 | Qualifications_Schoolchildrenandfull-timestudents_Age16to17;measures_Percent                                                                     | LA |
| 712 | 627 | Qualifications_Schoolchildrenandfull-timestudents_Age18andover;measures_Value                                                                    | LA |
| 713 | 628 | Qualifications_Schoolchildrenandfull-timestudents_Age18andover;measures_Percent                                                                  | LA |
| 714 | 629 | Qualifications_Full-timestudents_Age18to74_Economicallyactive_Inemployment;measures_Value                                                        | LA |
| 715 | 630 | Qualifications_Full-timestudents_Age18to74_Economicallyactive_Inemployment;measures_Percent                                                      | LA |
| 716 | 631 | Qualifications_Full-timestudents_Age18to74_Economicallyactive_Unemployed;measures_Value                                                          | LA |

|     |     |                                                                                           |      |
|-----|-----|-------------------------------------------------------------------------------------------|------|
| 717 | 632 | Qualifications_Full-timestudents_Age18to74_Economicallyactive_Unemployed;measures_Percent | LA   |
| 718 | 633 | Qualifications_Full-timestudents_Age18to74_Economicallyinactive;measures_Value            | LA   |
| 719 | 634 | Qualifications_Full-timestudents_Age18to74_Economicallyinactive;measures_Percent          | LA   |
| 720 | 635 | Age_Allcategories_Age;ResidenceType_Livesinahousehold;measures_Value                      | LA   |
| 721 | 636 | Age_Allcategories_Age;ResidenceType_Livesinacommunalestablishment;measures_Value          | LA   |
| 722 | 637 | Age_Age0to15;ResidenceType_Allcategories_Residencetype;measures_Value                     | LA   |
| 723 | 638 | Age_Age0to15;ResidenceType_Livesinahousehold;measures_Value                               | LA   |
| 724 | 639 | Age_Age0to15;ResidenceType_Livesinacommunalestablishment;measures_Value                   | LA   |
| 725 | 640 | Age_Age16to24;ResidenceType_Allcategories_Residencetype;measures_Value                    | LA   |
| 726 | 641 | Age_Age16to24;ResidenceType_Livesinahousehold;measures_Value                              | LA   |
| 727 | 642 | Age_Age16to24;ResidenceType_Livesinacommunalestablishment;measures_Value                  | LA   |
| 728 | 643 | Age_Age25to34;ResidenceType_Allcategories_Residencetype;measures_Value                    | LA   |
| 729 | 644 | Age_Age25to34;ResidenceType_Livesinahousehold;measures_Value                              | LA   |
| 730 | 645 | Age_Age25to34;ResidenceType_Livesinacommunalestablishment;measures_Value                  | LA   |
| 731 | 646 | Age_Age35to49;ResidenceType_Allcategories_Residencetype;measures_Value                    | LA   |
| 732 | 647 | Age_Age35to49;ResidenceType_Livesinahousehold;measures_Value                              | LA   |
| 733 | 648 | Age_Age35to49;ResidenceType_Livesinacommunalestablishment;measures_Value                  | LA   |
| 734 | 649 | Age_Age50to64;ResidenceType_Allcategories_Residencetype;measures_Value                    | LA   |
| 735 | 650 | Age_Age50to64;ResidenceType_Livesinahousehold;measures_Value                              | LA   |
| 736 | 651 | Age_Age50to64;ResidenceType_Livesinacommunalestablishment;measures_Value                  | LA   |
| 737 | 652 | Age_Age65andover;ResidenceType_Allcategories_Residencetype;measures_Value                 | LA   |
| 738 | 653 | Age_Age65andover;ResidenceType_Livesinahousehold;measures_Value                           | LA   |
| 739 | 654 | Age_Age65andover;ResidenceType_Livesinacommunalestablishment;measures_Value               | LA   |
|     |     | <b>Deprivation</b>                                                                        |      |
| 740 | 1   | IMDSCORE                                                                                  | LSOA |
| 741 | 2   | RANKOFIMDSCORE(where1ismostdeprived)                                                      | LSOA |
| 742 | 3   | IMDDecile_1isMostDeprived                                                                 | LSOA |
|     |     | <b>Place based longitudinal data</b>                                                      |      |
| 743 | 1   | Employment and Support Allowance claimants                                                | LSOA |
| 744 | 2   | Distance to nearest Gambling Outlet (minutes)                                             | LSOA |
| 745 | 3   | Distance to nearest Fast Food Outlet (minutes)                                            | LSOA |
| 746 | 4   | Distance to nearest Pubs/Bars/Nightclub (minutes)                                         | LSOA |
| 747 | 5   | Distance to nearest Off licence (minutes)                                                 | LSOA |
| 748 | 6   | Distance to nearest Tobacconists/Vape Store (minutes)                                     | LSOA |
| 749 | 7   | Distance to nearest GP Practice (minutes)                                                 | LSOA |
| 750 | 8   | Distance to nearest Hospital (minutes)                                                    | LSOA |
| 751 | 9   | Distance to nearest Dentist (minutes)                                                     | LSOA |
| 752 | 10  | Distance to nearest Pharmacy (minutes)                                                    | LSOA |

|     |    |                                                     |      |
|-----|----|-----------------------------------------------------|------|
| 753 | 11 | Distance to nearest Leisure Centre (minutes)        | LSOA |
| 754 | 12 | Distance to nearest Blue space (minutes)            | LSOA |
| 755 | 13 | NVDI value indicating Passive Green Space           | LSOA |
| 756 | 14 | Annual mean Nitrogen Dioxide ( $\mu\text{gm}^3$ )   | LSOA |
| 757 | 15 | Annual mean Particulate Matter ( $\mu\text{gm}^3$ ) | LSOA |
| 758 | 16 | Annual mean Sulphur Dioxide ( $\mu\text{gm}^3$ )    | LSOA |
| 759 | 17 | Health Domain Score                                 | LSOA |
| 760 | 18 | Green/Bluespace Domain Score                        | LSOA |
| 761 | 19 | Air quality Domain Score                            | LSOA |
| 762 | 20 | Retail Domain Score                                 | LSOA |
| 763 | 21 | Access to Healthy Assets and Hazards index score    | LSOA |
| 764 | 22 | AHAH Index ranked                                   | LSOA |
| 765 | 23 | AHAH Index percentiles                              | LSOA |
| 766 | 24 | SmallAreaMentalHealthIndex_index.2011               | LSOA |
| 767 | 25 | SmallAreaMentalHealthIndex_decile2011               | LSOA |
| 768 | 26 | SmallAreaMentalHealthIndex_index.2012               | LSOA |
| 769 | 27 | SmallAreaMentalHealthIndex_decile2012               | LSOA |
| 770 | 28 | SmallAreaMentalHealthIndex_index.2013               | LSOA |
| 771 | 29 | SmallAreaMentalHealthIndex_decile2013               | LSOA |
| 772 | 30 | SmallAreaMentalHealthIndex_index.2014               | LSOA |
| 773 | 31 | SmallAreaMentalHealthIndex_decile2014               | LSOA |
| 774 | 32 | SmallAreaMentalHealthIndex_index.2015               | LSOA |
| 775 | 33 | SmallAreaMentalHealthIndex_decile2015               | LSOA |
| 776 | 34 | SmallAreaMentalHealthIndex_index.2016               | LSOA |
| 777 | 35 | SmallAreaMentalHealthIndex_decile2016               | LSOA |
| 778 | 36 | SmallAreaMentalHealthIndex_index.2017               | LSOA |
| 779 | 37 | SmallAreaMentalHealthIndex_decile2017               | LSOA |
| 780 | 38 | SmallAreaMentalHealthIndex_index.2018               | LSOA |
| 781 | 39 | SmallAreaMentalHealthIndex_decile2018               | LSOA |
| 782 | 40 | SmallAreaMentalHealthIndex_index.2019               | LSOA |
| 783 | 41 | SmallAreaMentalHealthIndex_decile2019               | LSOA |

## Supplementary Information S5: Variable linkage and selection

Variable selection considered all the 783 variables listed in Supplementary Table S3. The variables acquired by linking primary and secondary data are:

- cancer diagnosis
- time of diagnosis
- post-code sector
- age group
- gender;
- ethnicity (African, any other Asian background, any other black background, any other ethnic group, any other mixed background, any other white background, Asian and Chinese, British, British Asian, Caribbean, Chinese, Chinese and white, English, Filipino, Indian, Irish, Italian, Northern-Irish, not known, other mixed white, other white or white unspecified, other white European, Pakistani, Polish, Scottish, Welsh, white and Asian, white and black African, white and black Caribbean);
- frailty score (fit, mild, moderate and severe);
- smoking information (never smoked, ex smoker, current smoker, unknown);
- co-morbidities (chronic kidney disease and stage, chronic obstructive pulmonary disease, congestive heart failure, coronary heart disease, depression, anxiety, hypertension, diabetes type and COVID19).

These primary and secondary data variables were recorded at the same time of the cancer diagnosis and aggregated every six months during the period 2017-2022. In addition, geographic-level conditions were extracted for each local authority without further manipulation from the following datasets:

- police crime reports (from <https://data.police.uk/>), for the same period of the cancer incidences (2017-2022);
- household data was obtained from the Office of National Statistics,

Census of 2011

([https://www.nomisweb.co.uk/sources/census\\_2011](https://www.nomisweb.co.uk/sources/census_2011));

- the index of multiple deprivation from the Ministry for Housing, Communities, and Local Government, and relative to 2019 (<https://www.gov.uk/government/statistics/english-indices-of-deprivation-2019>);
- place-based longitudinal data resource which includes health, social and behavioral variables (<https://pldr.org/>) relative to the 2020 update. Network distances in minutes to the nearest healthy asset or hazard as provided by PBLDR are calculated from the open source software Routino and by considering the quickest route through the transport network (1).

The Index of Multiple Deprivation (IMD) is the official measure of relative deprivation for LSOAs in England. Every LSOA in England is ranked from 1 (most deprived or poor) to 5 (quintile) or 10 (decile) (least deprived or most affluent), but there is no definitive cut-off below which an area is considered 'deprived' (2).

The linkage between primary (the GPs of the Morecambe Bay exCCG area) and secondary data (obtained from the University Hospitals of Morecambe Bay NHS Foundation Trust, including cancer diagnosis) data was performed by the data provider (University Hospitals of Morecambe Bay Trust). Linkage between linked primary and secondary data, and data from publicly available datasets (crime, census, IMD, PBLDR) was done by geographically merging the linked primary and secondary data at post-code sector level with the public dataset available at post-code, Local Authority or Lower Super Output Area levels. This is a common operation in geographic health analyses (3-5). Population estimates were required for calculating cancer risk and rates. These were obtained at LSOA level from the 2011 Census for England and Wales.

A stepwise selection method was applied to an accelerated failure model with lognormal distribution. The accelerated failure model allows the inclusion of censored data as the outcome (6), while cancer type and postcode sector were used as clusters for robust variance computation (to account for correlation within each cancer type). For the cancer counts  $C$ , the accelerated failure model is:

$$\log C_{i,j} = \beta_0 + \boldsymbol{\beta}_1 \mathbf{X}_{i,j} + u_i + \delta \varepsilon_{i,j}$$

where  $\beta_0$  is the intercept,  $\boldsymbol{\beta}_1$  is a vector of regression coefficients,  $u$  is the random effect,  $\delta$  is scale parameter and,  $\varepsilon$  is the error distribution assumed to have a normal distribution. The subscript  $i$  refers to post-code sector at a given time period, and  $j$  to the cancer type.

The accelerated failure model was estimated using the maximum likelihood estimation method. The model's performance was assessed using the Bayesian Information Criterion (BIC) and the best model was chosen as the one with the lowest BIC. The described model is mostly used in parametric mixed survival problems with left truncated data or Tobit regression, where the time to occurrence of an event was substituted here with the number of patients with a cancer type. The use of the proposed method for non-survival data has been described elsewhere (7).

## References

1. Green MA, Daras K, Davies A, Barr B, Singleton A. Developing an openly accessible multi-dimensional small area index of 'Access to Healthy Assets and Hazards' for Great Britain, 2016. *Health Place*. 2018;54:11-9.
2. Rogers SN, Staunton A, Girach R, Langton S, Lowe D. Audit of the two-week pathway for patients with suspected cancer of the head and neck and the influence of socioeconomic status. *Br J Oral Maxillofac Surg*. 2019;57(5):419-24.
3. McNally RJ, Alston RD, Cairns DP, Eden OB, Birch JM. Geographical and ecological analyses of childhood acute leukaemias and lymphomas in north-west England. *Br J Haematol*. 2003;123(1):60-5.
4. Manda SO, Feltbower RG, Gilthorpe MS. Investigating spatio-temporal similarities in the epidemiology of childhood leukaemia and diabetes. *Eur J Epidemiol*. 2009;24(12):743-52.
5. Wheeler BW, Kothencz G, Pollard AS. Geography of non-melanoma skin cancer and ecological associations with environmental risk factors in England. *Br J Cancer*. 2013;109(1):235-41.
6. Kalbfleisch JD, Prentice RL. *The statistical analysis of failure time data*: John Wiley & Sons; 2011.
7. Kong S, Nan B. Semiparametric approach to regression with a covariate subject to a detection limit. *Biometrika*. 2016;103(1):161-74.

## Supplementary Information S6: Inference

The proposed model allowed for shared local space dependence, in addition to cancer specific components. Similar frameworks have been proposed elsewhere for cancers and other diseases (1), although none of them are censored cancer-specific. This allowed to investigate spatial inequalities in cancer, especially between urban and rural areas.

The log of the number of cases observed in each postcode sector was the dependent variable, and the individual and ecological variables obtained from the variable selection step were the independent variables. The joint model is spatially explicit (by modelling the spatial autocorrelation common to all the cancer types) and Bayesian, and for these reasons adapted to stabilise risk estimates based on small numbers at postcode sector level (2). The resulting relative risk estimate for each postcode sector is a form of smoothed average of the observed risk and the mean relative risk in the neighbouring postcode sectors conditioned to a set of prior assumptions.

The common shared component is the spatial dependence, which results from common factors interacting with the cancers, but not represented by independent variables. If spatial dependence is disregarded, inferences are likely to be biased (3).

Since the cancer counts are censored, the joint model's maximum likelihood estimation method integrates the censored data into the likelihood function. Therefore, the observed cancers' counts are simultaneously modelled with the censored data.

Within this approach the method first models the complete response values, including both the observed and the unobserved values, and then models the censored values conditioned on the complete response values (4). To facilitate the computation of the spatial dependence structure the data were modelled using a log Gaussian process (4). The main advantage of the likelihood-based approach is that it utilizes all the information available (5).



Formally, let  $Y_{j,s}$  represent the observed (including censored) number of cases of cancer type  $j$  at postcode sector  $s$ . The joint modelling follows the multivariate spatial Bayesian log-Gaussian model for left-censored data proposed by Sahoo and colleagues (6) adapted to Poisson (Po) processes (7) and to account for censoring levels varying among locations.  $Y$  follows a Poisson distribution with mean  $E_{j,s}\theta_{j,s}$ :

$$Y_{j,s}|\theta_{j,s} \sim Po(E_{j,s}\theta_{j,s})$$

where  $E$  is the expected number of cases and  $\theta$  is the relative risk modelled using a Poisson log-linear model within a multivariate spatial Bayesian framework:

$$\log(\theta_{j,s}) = \mathbf{X}_s + z_{j,s} + \varepsilon_{j,s} \text{ with } j=1,2, \dots, J$$

where  $\mathbf{X}$  is the (full rank) design matrix containing the covariate values (obtained from the variable selection step described above and common to all cancers),  $\beta$  are unknown regression coefficients,  $z$  is a multivariate spatial zero mean Gaussian process, at every location  $s$  and for each joint process  $j$  with non-singular covariance matrix  $\Sigma$ :

$$\Sigma = \sigma^2 \Psi \text{ and } \Psi = (v^2 \mathbf{I} + \mathbf{K}(\phi)), \quad v^2 = \frac{\tau^2}{\sigma^2}$$

where  $\mathbf{K}$  is the exponential spatial correlation matrix controlling the spatial smoothness of the cancers,  $v$  is the ratio between the spatial variance  $\tau^2$  and the total variance  $\sigma^2$ , and  $\mathbf{I}$  is the identity matrix. These parameters are common for all cancer types. Finally,  $\varepsilon$  is the multivariate nugget effect (pure error term), zero-mean normally distributed with covariance  $(1 - v^2)\Sigma$ .

The data of size  $n$  consist of  $m$  exact observations and  $n-m$  (censored) interval observations at locations  $s^*$ . Therefore,  $Y_j^c$  is left-censored with censoring level  $u_{j,s^*}$ , with  $u_{j,s^*}$  being one of the following integer intervals:  $[[1,2]]$ ,  $[[1,3]]$ ,  $[[1,4]]$  and  $[[1,5]]$ , depending on the cancer type and location.

The likelihood for censored spatial data of cancer  $j$ , in its generic form, is:

$$\mathcal{L}_j(\theta) = \int_{u_j}^{\infty} Normal_j(y_j; \beta_j \mathbf{X}, \Sigma) du_j$$

The set of parameters and hyperparameters are:

$$\Theta = \{\beta, \Sigma, \phi, v, \varepsilon, \mathbf{Y}^c, \mathbf{Y}^0\}$$

where  $\mathbf{Y}^c$  is the set of censored cancer observations and  $\mathbf{Y}^0$  the set of cancers to be predicted. Inference on these parameters is based on Markov chain Monte Carlo (MCMC) sampling. The regression coefficients  $\beta$  are assumed to have normal priors with zero mean and ten standard deviations; the covariance  $\Sigma$  follows an Inverse-Wishart

distribution with scale 0.01 and degrees of freedom 0.011; the spatial range parameter  $\phi$  is uniformly distributed between 0 and 50 km (approximately half of the maximum distance between two postcode-sectors); the ratio of spatial to total variance  $\nu$  is uniformly distributed between its natural limits of 0 and 1; finally the pure error term  $\varepsilon$  is normally distributed with mean zero and variance  $\nu \Sigma_s \otimes \Sigma$ , with  $\Sigma_s$  been the spatial covariance. Censored values are inputted at every iteration from a Truncated-Normal distribution for each cancer type. In practice, by using conventional equations the truncated-normal distribution probability at each censored value is used to estimate the inputted binomial value (8).

⑥ relative posteriors and full MCMC algorithm are described elsewhere (6).

We ran the MCMC for 100,000 iterations and discarded the first 20,000 iterations. The remaining 80,000 iterations were thinned by keeping one of every fifty. Convergence was assessed by a visual examination of trace plots. Results were based on posterior sample sizes sufficient to give Monte Carlo standard errors less than 5% of the posterior standard deviation for the parameters of interest (9)

Uncertainty is represented by the posterior standard deviation of the outcome or parameter of interest, with smaller values indicating more certainty in the inference of the parameter or the prediction of the outcome. Uncertainty enables a better understanding of the information produced and more informed decision making based on this information. For example, large uncertainties may be dependent on the vaguely defined or non-informative assumptions made for the model, the absence of model components, and/or the lack of predictive capacity from the employed risk factors. As stressed by Roberts and colleagues (10), ignoring and/or not understanding uncertainty information can result in misinterpretation of model outputs, substandard decision making, or disregard of important information due to its large uncertainty.

## References

1. Manda SO, Feltbower RG, Gilthorpe MS. Investigating spatio-temporal similarities in the epidemiology of childhood leukaemia and diabetes. *Eur J Epidemiol.* 2009;24(12):743-52.
2. Jarup L, Best N, Toledano MB, Wakefield J, Elliott P. Geographical epidemiology of prostate cancer in Great Britain. *Int J Cancer.* 2002;97(5):695-9.
3. Nogueira MC, Fayer VA, Correa CSL, Guerra MR, Stavola B, Dos-Santos-Silva I, et al. Inequities in access to mammographic screening in Brazil. *Cad Saude Publica.* 2019;35(6):e00099817.
4. Qu T, Li B, Sally Chan Mp, Albarracin D. Bias correction for nonignorable missing counts of areal HIV new diagnosis. *Stat.* 2023;12(1).
5. Leung K-M, Elashoff RM, Afifi AA. Censoring issues in survival analysis. *Annual review of public health.* 1997;18(1):83-104.
6. Sahoo I, Hazra A. Contamination mapping in Bangladesh using a multivariate spatial Bayesian model for left-censored data. *arXiv preprint arXiv:210615730.* 2021.
7. Gomez-Rubio V, Palmi-Perales F, Lopez-Abente G, Ramis-Prieto R, Fernandez-Navarro P. Bayesian joint spatio-temporal analysis of multiple diseases. *Sort-Stat Oper Res T.* 2019;43(1):51-74.

8. Horgan JM. Probability with R: an introduction with computer science applications: John Wiley & Sons; 2019.
9. Best N, Hansell AL. Geographic variations in risk: adjusting for unmeasured confounders through joint modeling of multiple diseases. *Epidemiology*. 2009;20(3):400-10.
10. Roberts J, Cramb S, Baade P, Mengersen K. Communicating statistical outputs through health maps. 2016.

Supplementary Table S4. Predicted and real total number of diagnosed cancers, and relative rates, in the study area between 2017 and 2022. 95%CRL is the lower limit of the 95% credible interval for the model-predicated cancer counts; 95%CRU is the upper limit of the 95% credible interval for the model-predicated cancer counts. \* data from the Office of National Statistics for the year 2017. \*\* data from Cancer Research UK for the period 2016-2018.

| Cancer type   | Cancer counts |                            |                            |                       |                       |        | Rates x 100,000 per year |             |        |             |           |
|---------------|---------------|----------------------------|----------------------------|-----------------------|-----------------------|--------|--------------------------|-------------|--------|-------------|-----------|
|               | Real          | Individual model predicted | Individual model Error (%) | Joint Model predicted | Joint model Error (%) | 95%CRL | 95%CRU                   | Joint Model | Real   | North West* | England** |
| Breast        | 2076          | 2537                       | 22.2                       | 2011                  | -3.1                  | 1389   | 2181                     | 100.26      | 103.5  | 95          | 83        |
| Colorectal    | 1606          | 946                        | -41.1                      | 1680                  | 4.6                   | 822    | 2200                     | 83.76       | 80.07  | 72          | 69        |
| Gynaecology   | 670           | 335                        | -50.0                      | 708                   | 5.7                   | 490    | 994                      | 35.3        | 33.4   | 36          | 32        |
| Haematology   | 992           | 429                        | -56.8                      | 947                   | -4.5                  | 590    | 1131                     | 47.21       | 49.46  | 48          | 47        |
| Head and Neck | 539           | 338                        | -37.3                      | 519                   | -3.7                  | 391    | 931                      | 25.88       | 26.87  | 28          | 18        |
| Lung          | 1535          | 948                        | -38.2                      | 1570                  | 2.3                   | 1135   | 2009                     | 78.28       | 76.53  | 92          | 76        |
| Skin          | 4599          | 4413                       | -4.0                       | 4276                  | -7.0                  | 3276   | 4922                     | 213.19      | 229.29 | 254         | 257       |
| Upper GI      | 1039          | 420                        | -59.6                      | 943                   | -9.2                  | 628    | 1145                     | 47.02       | 51.8   | 61          | 50        |
| Urology       | 2450          | 1882                       | -23.2                      | 2589                  | 5.7                   | 1999   | 2714                     | 129.08      | 122.15 | 108         | 98        |

Supplementary Table S5. Descriptive statistics for model-based cancer counts by cancer type per postcode sector and 6 months period. Incidence refers to 1000 people. SD = standard deviation, SEI = standard error incidence, SEI50 standard error for incidence in 50 years old and under, SEIO50 = standard error for incidence in over 50 years old. Standard errors were estimated using a Poisson approximation method (see methods).

| <b>Cancer type</b> | <b>Mean</b> | <b>SD</b> | <b>Incidence</b> | <b>Incidence for 50 and under</b> | <b>Incidence for over 50</b> | <b>SEI</b> | <b>SEI50</b> | <b>SEIO50</b> |
|--------------------|-------------|-----------|------------------|-----------------------------------|------------------------------|------------|--------------|---------------|
| Breast             | 2.79        | 1.57      | 1.65             | 0.57                              | 2.84                         | 1.51       | 0.93         | 4.49          |
| Colorectal         | 2.33        | 0.8       | 1.38             | 0.24                              | 2.65                         | 1.21       | 0.52         | 6.13          |
| Gynaecology        | 0.98        | 0.47      | 0.58             | 0.16                              | 0.82                         | 0.46       | 0.35         | 1.34          |
| Haematology        | 1.31        | 0.51      | 0.78             | 0.15                              | 1.33                         | 0.55       | 0.41         | 1.84          |
| Head and Neck      | 0.95        | 0.45      | 0.56             | 0.14                              | 0.69                         | 0.42       | 0.35         | 1.28          |
| Lung               | 2.18        | 1.02      | 1.29             | 0.11                              | 2.37                         | 1.03       | 0.41         | 3.82          |
| Skin               | 9.55        | 6.06      | 5.68             | 0.81                              | 12.41                        | 5.34       | 1.28         | 17.77         |
| Upper GI           | 1.31        | 0.46      | 0.78             | 0.07                              | 1.43                         | 0.49       | 0.21         | 1.94          |
| Urology            | 3.59        | 2.07      | 2.13             | 0.32                              | 4.53                         | 1.87       | 0.71         | 6.17          |

Supplementary Table S6. Number of cancer types in postcode sectors

| <b>Number of cancer types in each postcode sector</b> | <b>Number of postcode sectors</b> | <b>Range in the proportion of the population in postcode sectors respect to the overall in the Morecambe Bay ex CCG extended area.</b> |
|-------------------------------------------------------|-----------------------------------|----------------------------------------------------------------------------------------------------------------------------------------|
| 12                                                    | 4                                 | 0.83% - 2.30%                                                                                                                          |
| 11                                                    | 30                                | 0.49% - 3.26%                                                                                                                          |
| 10                                                    | 20                                | 0.26% - 2.53%                                                                                                                          |
| 9                                                     | 2                                 | 0.22% - 0.63%                                                                                                                          |
| 8                                                     | 1                                 | 1.90%                                                                                                                                  |
| 6                                                     | 1                                 | 2.38%                                                                                                                                  |
| 4                                                     | 2                                 | 1.02% - 1.07%                                                                                                                          |
| 2                                                     | 1                                 | 1.40%                                                                                                                                  |
| 1                                                     | 14                                | 0.2% - 2.73%                                                                                                                           |

Supplementary Table S7. Variable selection method: summary statistics for selected candidate variables for joint modelling. SD = standard deviation; min = minimum, max = maximum, 25PER = 25<sup>th</sup> percentile or first quartile (the value below which 25% of the data falls in a dataset), 75PER = 75th percentile or third quartile (the value below which 75% of the data falls in a dataset).

| <b>Risk Factor (number of people with)</b>                            | <b>Mean</b> | <b>SD</b> | <b>Min</b> | <b>25PER</b> | <b>75PER</b> | <b>Max</b> |
|-----------------------------------------------------------------------|-------------|-----------|------------|--------------|--------------|------------|
| Age 60 to 80                                                          | 7.9         | 5.8       | 0          | 4            | 11           | 42         |
| Age above 80                                                          | 4.3         | 3.7       | 0          | 2            | 5            | 21         |
| Any other Black background                                            | 0.0014      | 0.037     | 0          | 0            | 0            | 1          |
| British                                                               | 8.9         | 7.3       | 0          | 4            | 12           | 45         |
| Chronic Kidney Disease                                                | 4.7         | 3.6       | 0          | 2            | 6            | 24         |
| Congestive Hearth Failure                                             | 1.4         | 1.3       | 0          | 0            | 2            | 10         |
| Coronary Heart Disease                                                | 14          | 11        | 0          | 6            | 20           | 54         |
| COVID19                                                               | 0.73        | 1.4       | 0          | 0            | 1            | 8          |
| Depression                                                            | 6.3         | 4.4       | 0          | 3            | 8            | 26         |
| Diabetes                                                              | 5.6         | 4.1       | 0          | 3            | 7            | 25         |
| Ex Smoker                                                             | 0.84        | 0.96      | 0          | 0            | 1            | 6          |
| Female age 25-49 mixed white and Asian (area)                         | 3.9         | 5.1       | 0          | 0            | 8            | 20         |
| Frailty (number of fit)                                               | 5.9         | 4.2       | 0          | 3            | 7            | 24         |
| Hypertension                                                          | 11          | 8.1       | 0          | 5            | 15           | 45         |
| Self employed (including fulltime students) one parent working (area) | 30          | 20        | 0          | 15           | 45           | 110        |
| Male Pakistani (area)                                                 | 12          | 29        | 0          | 0            | 9            | 220        |
| Northern Irish (area)                                                 | 0.0014      | 0.037     | 0          | 0            | 0            | 1          |
| Other White background (area)                                         | 0.0055      | 0.074     | 0          | 0            | 0            | 1          |
| Pakistani                                                             | 0.0028      | 0.053     | 0          | 0            | 0            | 1          |
| Scottish (area)                                                       | 0.022       | 0.15      | 0          | 0            | 0            | 1          |
| Smoker                                                                | 0.89        | 1         | 0          | 0            | 1            | 5          |
| White and Black Caribbean                                             | 0.0014      | 0.037     | 0          | 0            | 0            | 1          |

Supplementary Information S7: Statistically significant risk factors by cancer type

Joint modelling: statistically significant risk factors for Breast cancer

| <b>Risk factor</b>       | <b>OR</b> | <b>Low CI</b> | <b>Upp CI</b> |
|--------------------------|-----------|---------------|---------------|
| Chronic Kidney Disease   | 1.14      | 1.07          | 1.21          |
| Congestive Heart Failure | 1.08      | 1.04          | 1.13          |
| COVID19                  | 1.11      | 1.02          | 1.20          |
| Depression               | 1.00      | 1.00          | 1.01          |
| Diabetes                 | 1.07      | 1.02          | 1.13          |
| Age above 80             | 1.24      | 1.04          | 1.50          |
| Time                     | 1.34      | 1.09          | 1.61          |



# Joint modelling: statistically significant risk factors for Colorectal cancer

| Risk factor                                                           | OR   | Low CI | Upp CI |
|-----------------------------------------------------------------------|------|--------|--------|
| Coronary Hearth Disease                                               | 1.04 | 1.02   | 1.06   |
| COVID19                                                               | 1.06 | 1.01   | 1.10   |
| Depression                                                            | 1.10 | 1.03   | 1.13   |
| Diabetes                                                              | 1.31 | 1.20   | 1.44   |
| Hypertension                                                          | 1.06 | 1.00   | 1.14   |
| Age 60 to 80                                                          | 5.14 | 2.30   | 11.39  |
| Age above 80                                                          | 0.73 | 0.59   | 0.95   |
| Ex Smoker                                                             | 1.23 | 1.10   | 1.37   |
| Self employed (including fulltime students) one parent working (area) | 0.95 | 0.91   | 0.99   |
| British                                                               | 1.52 | 1.26   | 1.81   |
| Any other Black background                                            | 1.09 | 1.03   | 1.16   |
| Other White background (area)                                         | 0.89 | 0.83   | 0.95   |
| Pakistani                                                             | 1.11 | 1.03   | 1.19   |
| Scottish (area)                                                       | 1.19 | 1.11   | 1.28   |
| White and Black Caribbean (area)                                      | 1.18 | 1.03   | 1.36   |
| Time                                                                  | 1.08 | 1.02   | 1.15   |

# Joint modelling: statistically significant risk factors for Gynaecology cancer

| <b>Risk factor</b>            | <b>OR</b> | <b>Low CI</b> | <b>Upp CI</b> |
|-------------------------------|-----------|---------------|---------------|
| Chronic Kidney Disease        | 1.00      | 1.00          | 1.00          |
| Depression                    | 0.91      | 0.84          | 1.00          |
| Diabetes                      | 1.04      | 1.01          | 1.07          |
| Frailty (number of fit)       | 0.89      | 0.83          | 0.95          |
| Age above 80                  | 1.26      | 1.17          | 1.34          |
| Smoker                        | 0.92      | 0.84          | 0.99          |
| Other White background (area) | 1.01      | 1.00          | 1.02          |

# Joint modelling: statistically significant risk factors for Haematology cancer

| <b>Risk factor</b>        | <b>OR</b> | <b>Low CI</b> | <b>Upp CI</b> |
|---------------------------|-----------|---------------|---------------|
| Chronic Kidney Disease    | 1.04      | 1.01          | 1.06          |
| Covid19                   | 1.16      | 1.03          | 1.31          |
| Smoker                    | 1.12      | 1.01          | 1.23          |
| White and Black Caribbean | 1.11      | 1.01          | 1.22          |

# Joint modelling: statistically significant risk factors for Head and Neck cancer

| <b>Risk factor</b>        | <b>OR</b> | <b>Low CI</b> | <b>Upp CI</b> |
|---------------------------|-----------|---------------|---------------|
| Chronic Kidney Disease    | 0.98      | 0.96          | 1.00          |
| COVID19                   | 1.16      | 1.04          | 1.30          |
| Smoker                    | 1.12      | 1.02          | 1.24          |
| White and Black Caribbean | 1.11      | 1.01          | 1.21          |
| Northern Irish (area)     | 0.90      | 0.82          | 0.98          |

# Joint modelling: statistically significant risk factors for Lung cancer

| <b>Risk factor</b>                                                    | <b>Odd ratios (OR)</b> | <b>Low 95% Confidence interval</b> | <b>Upper 95% Confidence interval</b> |
|-----------------------------------------------------------------------|------------------------|------------------------------------|--------------------------------------|
| Congestive Heart Failure                                              | 0.35                   | 0.14                               | 0.87                                 |
| Chronic Kidney Disease                                                | 1.28                   | 1.16                               | 1.41                                 |
| Coronary Heart Disease                                                | 1.18                   | 1.11                               | 1.26                                 |
| Smoker                                                                | 1.05                   | 1.03                               | 1.07                                 |
| Self employed (including fulltime students) one parent working (area) | 0.92                   | 0.86                               | 0.98                                 |
| Female age 25-49 mixed white and Asian (area)                         | 11.53                  | 2.81                               | 55.79                                |
| Male Pakistani (area)                                                 | 1.07                   | 1.00                               | 1.14                                 |
| Northern Irish (area)                                                 | 1.30                   | 1.02                               | 1.69                                 |

# Joint modelling: statistically significant risk factors for Skin cancer

| <b>Risk factor</b>         | <b>OR</b> | <b>Low CI</b> | <b>Upp CI</b> |
|----------------------------|-----------|---------------|---------------|
| Ex Smoker                  | 0.69      | 0.55          | 0.87          |
| Any other Black background | 8.23      | 3.44          | 18.54         |

# Joint modelling: statistically significant risk factors for Upper GI cancer

| <b>Risk factor</b>      | <b>OR</b> | <b>Low CI</b> | <b>Upp CI</b> |
|-------------------------|-----------|---------------|---------------|
| Chronic Kidney Disease  | 1.00      | 1.00          | 1.00          |
| Covid19                 | 0.98      | 0.97          | 0.99          |
| Depression              | 0.90      | 0.83          | 0.99          |
| Frailty (number of fit) | 0.89      | 0.83          | 0.96          |
| Smoker                  | 0.91      | 0.84          | 0.99          |
| Northern Irish (area)   | 0.97      | 0.95          | 1.00          |

# Joint modelling: statistically significant risk factors for Urology cancer

| <b>Risk factor</b>            | <b>OR</b> | <b>Low CI</b> | <b>Upp CI</b> |
|-------------------------------|-----------|---------------|---------------|
| COVID19                       | 0.95      | 0.90          | 1.00          |
| Diabetes                      | 0.69      | 0.67          | 0.80          |
| Age 60 to 80                  | 1.20      | 1.12          | 1.28          |
| Age above 80                  | 0.73      | 0.58          | 0.93          |
| Ex Smoker                     | 1.45      | 1.24          | 1.70          |
| British                       | 1.49      | 1.24          | 1.79          |
| Any other Black background    | 1.09      | 1.02          | 1.16          |
| Other White background (area) | 0.89      | 0.82          | 0.95          |
| White and Black Caribbean     | 1.19      | 1.04          | 1.37          |
| Scottish (area)               | 1.20      | 1.12          | 1.28          |
| Time                          | 1.15      | 1.06          | 1.26          |



## Supplementary Information S8: Further results on risk factors

Increasing cancer incidence over time was found for the breast, colorectal and urology cancer types, with breast cancer types increasing faster than the other two cancer types. Being a current smoker or ex-smoker is usually associated to an increased risk of cancer diagnosis. However, 'smoking' was found protective for upper GI and gynaecology cancer types. Apart from breast cancer, all the other cancer types were associated to one or more variables belonging to the ethnicity categorisation. Fifteen times they appeared as a risk factor and only four times as protective. Large risks were found for 'female age 25-49 mixed white and Asian' for lung cancer type and for 'any other black background' for skin cancer type. 'White and black Caribbean' and 'any other black background' were the most common risk factors appearing statistically significant for four and three cancer types, respectively (Table 1 main text).

By employing a Poisson generalised linear model for any selected important factor (listed in Table 1 of main text) as the outcome and each one of the remaining 783 variables considered in this study as a predictor, we found that the selected variables were mostly associated to higher values of ecological variables such as Small Area Mental Health Index (meaning worst mental health conditions), unemployment, criminality (shoplifting, criminal damage) and lone parenting (Supplementary Table below). The Small Area Mental Health Index takes into consideration depression rates, incapacity benefit and employment support allowance for mental illness, prescription of antidepressant, and mental health related hospital attendances. In the mediation analysis, the risk factors of only two cancer types mediated other factors. For breast cancer the effect of diabetes was weakly influenced by 'age over 60' (coefficient of the average causal mediation effects for the variable 0.23, *p-value* = 0.04) and also by the 'Scottish ethnicity' (coefficient -0.15, *p-value* = 0.04); for urology cancer, the 'COVID19' variable was weakly influenced by 'never smoker' (coefficient -0.09, *p-value* = 0.02) and 'Scottish ethnicity' (coefficient 0.32, *p-value* = 0.02).

Supplementary Table. Largest statistically significant associations between selected important variables (selected variable) and other variables in the dataset.

| Selected variable                                                     | Correlated variable                                   | Regression coefficient | P-value |
|-----------------------------------------------------------------------|-------------------------------------------------------|------------------------|---------|
| Age 60 to 80                                                          | Small Area Mental Health Index (higher values: worst) | 0.066                  | <0.001  |
| Age above 80                                                          | Small Area Mental Health Index (higher values: worst) | 0.063                  | <0.001  |
| Any other Black background                                            | Not living in a couple                                | 0.649                  | 0.006   |
| British                                                               | Small Area Mental Health Index (higher values: worst) | 0.095                  | <0.001  |
| Chronic Kidney Disease                                                | Distance to nearest Tobacconists/Vape Store (minutes) | -0.015                 | <0.001  |
| Congestive Hearth Failure                                             | Small Area Mental Health Index (higher values: worst) | 0.086                  | <0.001  |
| Coronary Heart Disease                                                | Small Area Mental Health Index (higher values: worst) | 0.076                  | <0.001  |
| COVID19                                                               | Shoplifting                                           | 0.063                  | 0.001   |
| Depression                                                            | Small Area Mental Health Index (higher values: worst) | 0.065                  | <0.001  |
| Diabetes                                                              | Small Area Mental Health Index (higher values: worst) | 0.063                  | <0.001  |
| Ex Smoker                                                             | Distance to nearest GP Practice (minutes)             | -0.036                 | <0.001  |
| Frailty (number of fit)                                               | Small Area Mental Health Index (higher values: worst) | 0.052                  | <0.001  |
| Hypertension                                                          | Small Area Mental Health Index (higher values: worst) | 0.073                  | <0.001  |
| Female age 25-49 mixed white and Asian (area)                         | Cohabiting                                            | -0.055                 | <0.001  |
| Northern Irish (area)                                                 | Asian, Asian British                                  | 0.298                  | 0.006   |
| Other White background (area)                                         | Criminal damage and arson                             | 0.778                  | 0.009   |
| Pakistani                                                             | Shoplifting                                           | 0.007                  | 0.006   |
| Self employed (including fulltime students) one parent working (area) | Shoplifting                                           | 0.011                  | <0.001  |
| Scottish (area)                                                       | Loneparenting                                         | 0.057                  | 0.006   |
| Smoker                                                                | Small Area Mental Health Index (higher values: worst) | 0.093                  | <0.001  |
| White and Black Caribbean                                             | Small Area Mental Health Index (higher values: worst) | 1.751                  | 0.010   |

# Supplementary Information S9: Cancer type risk mapping and relative standard errors

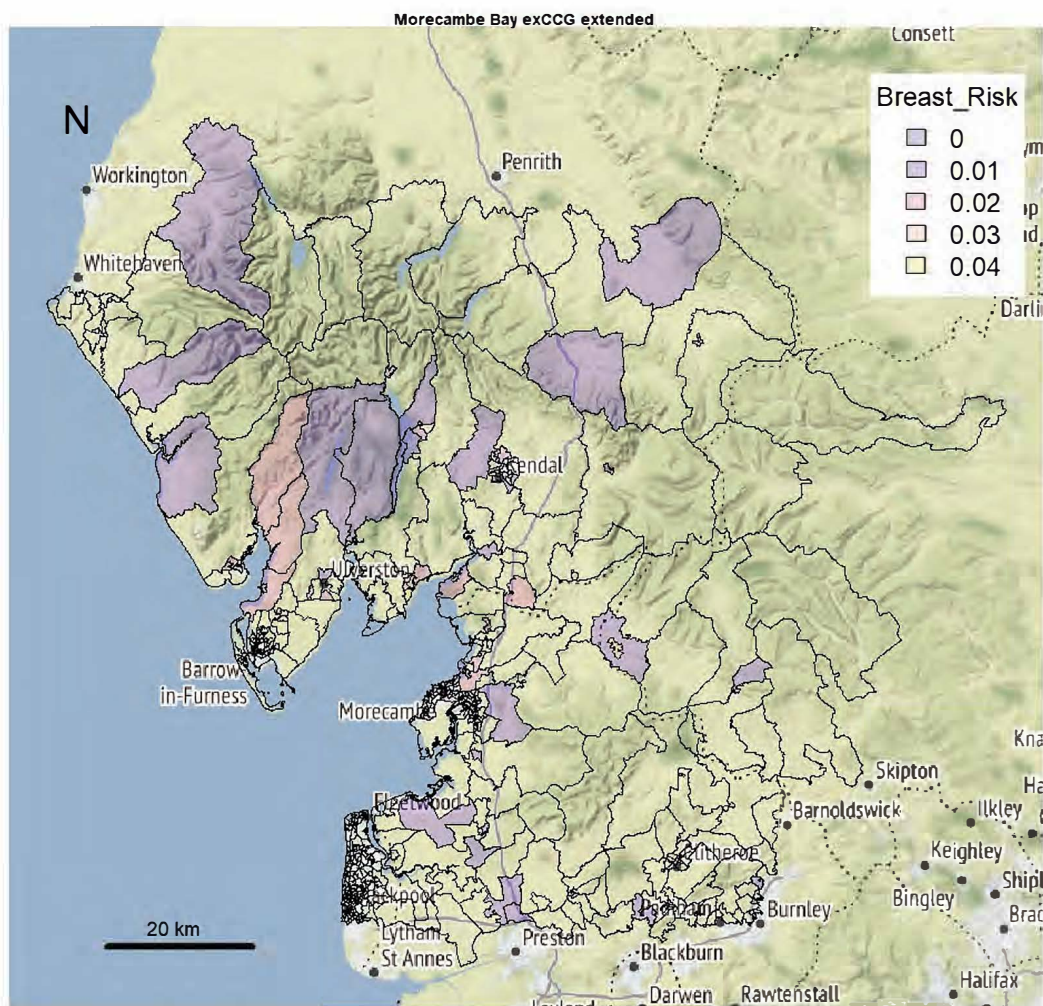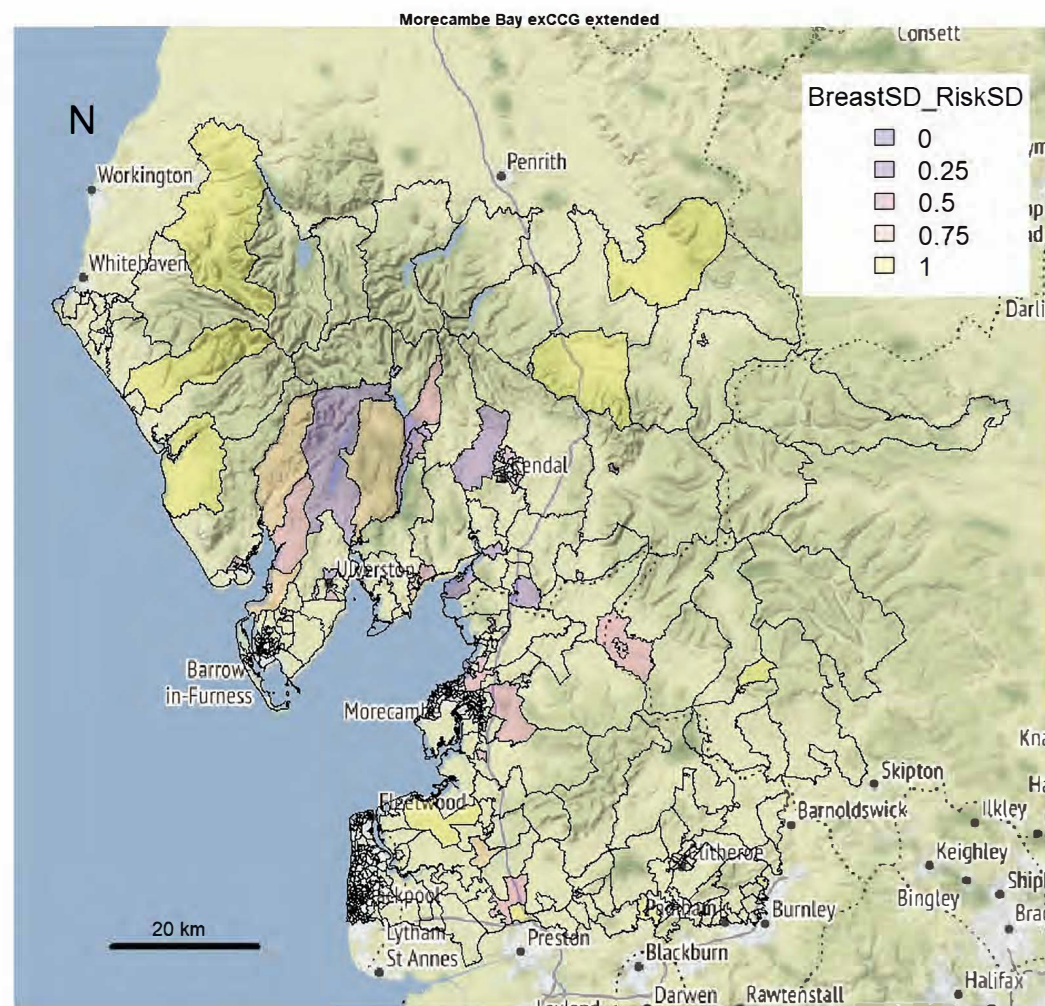

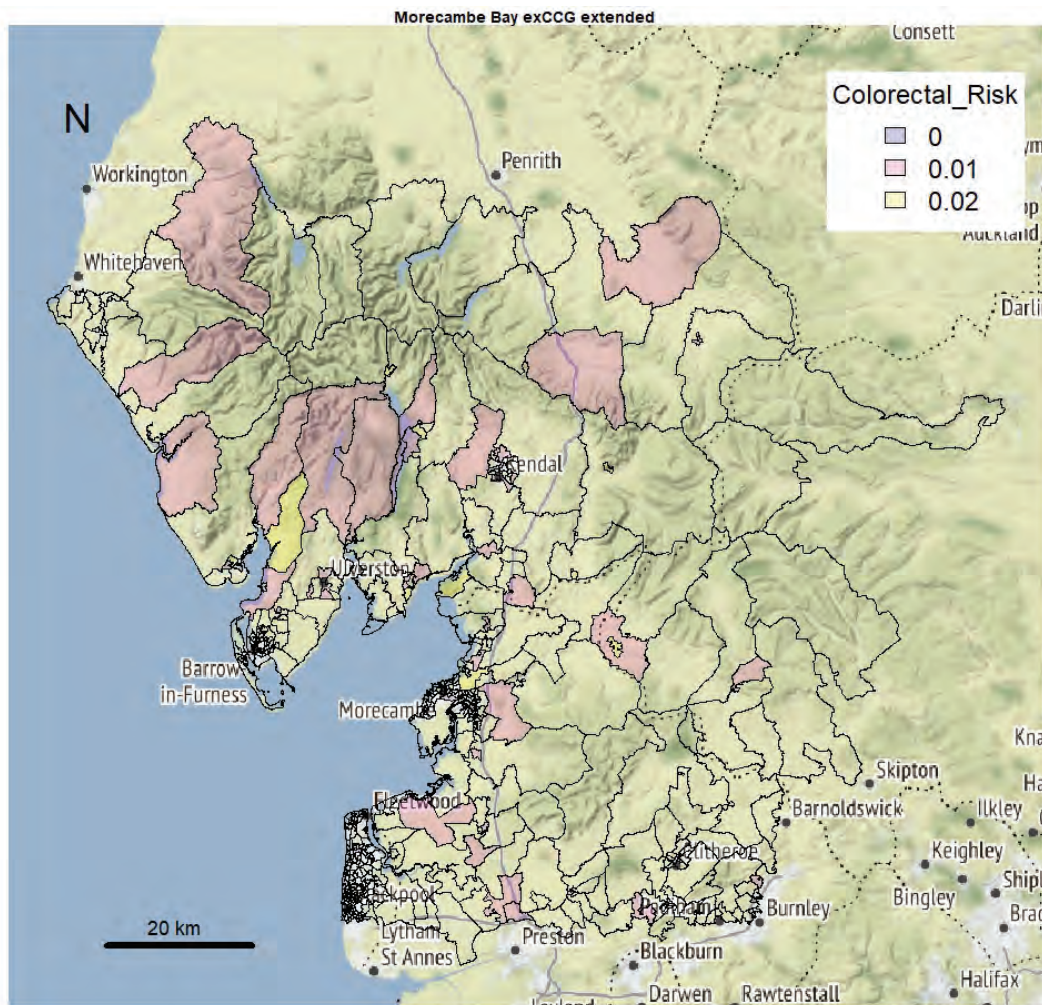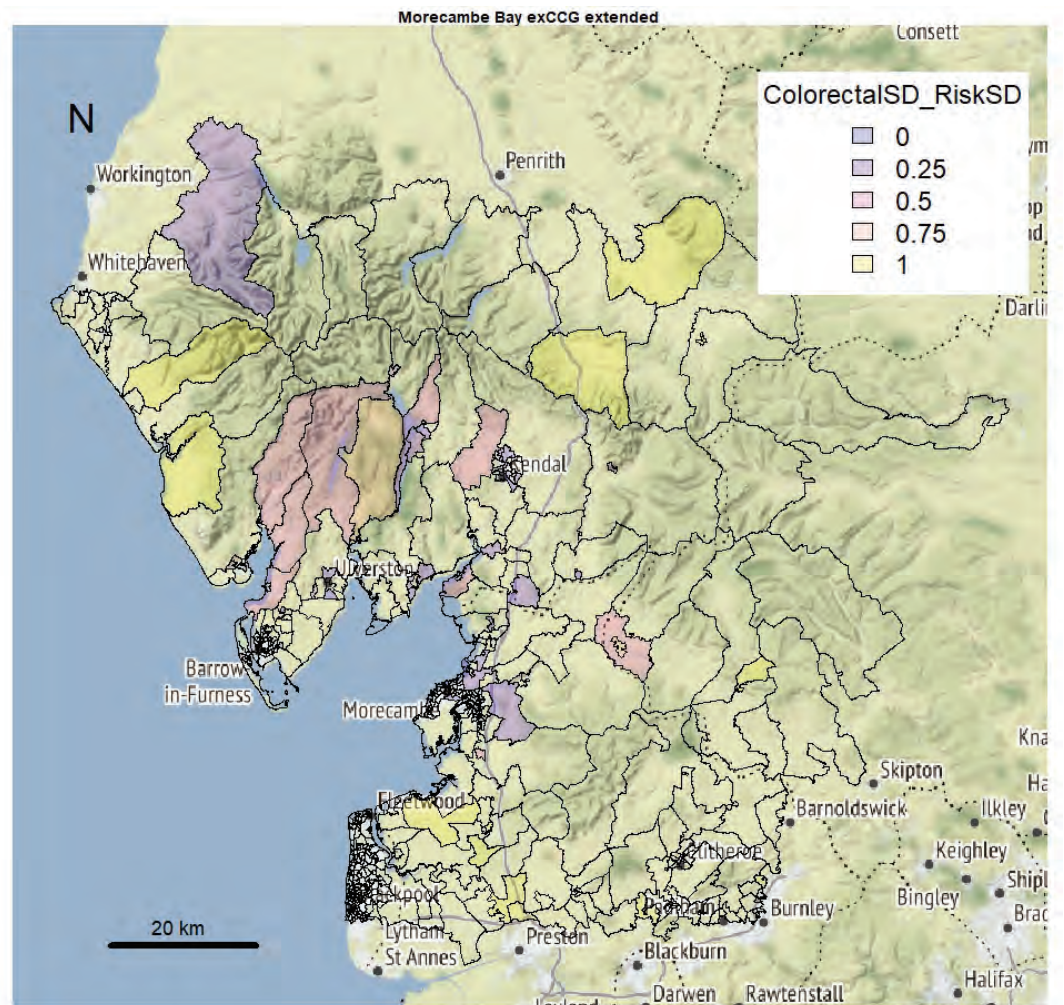

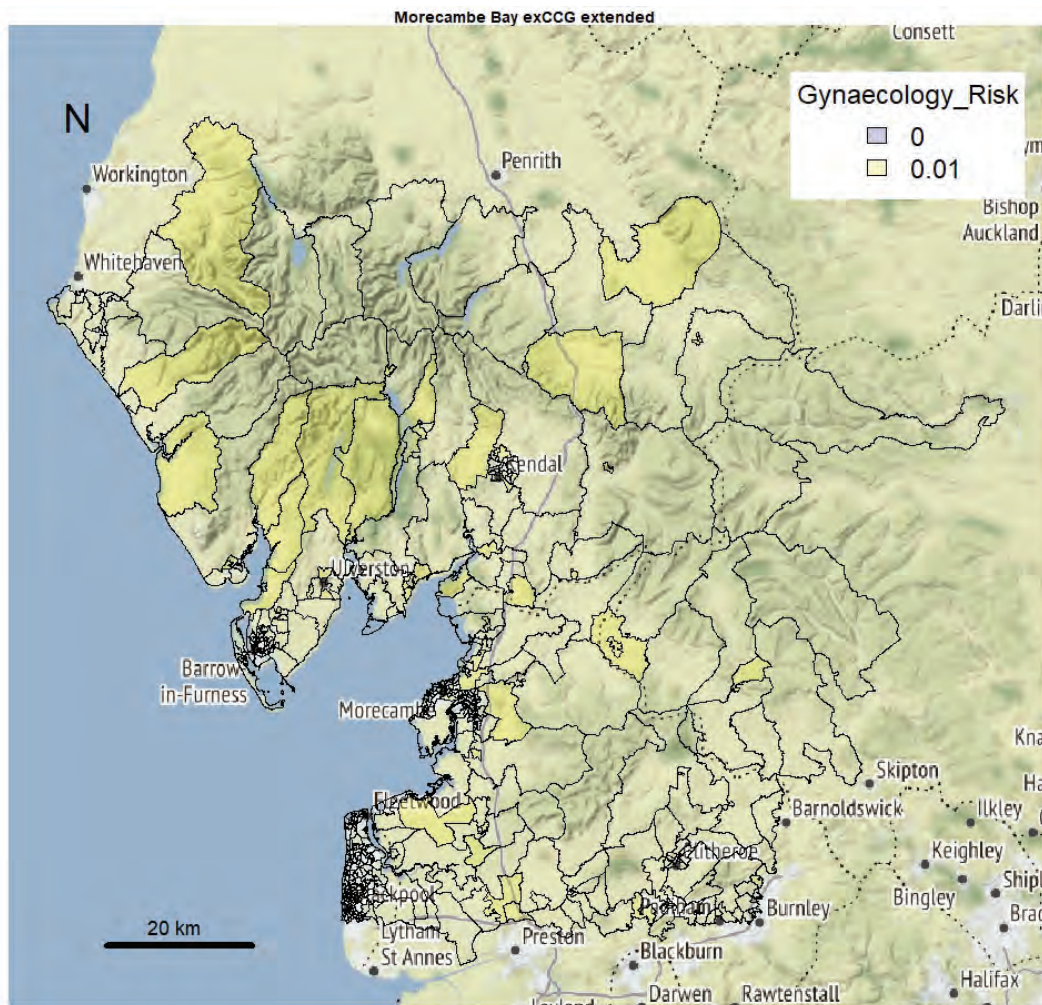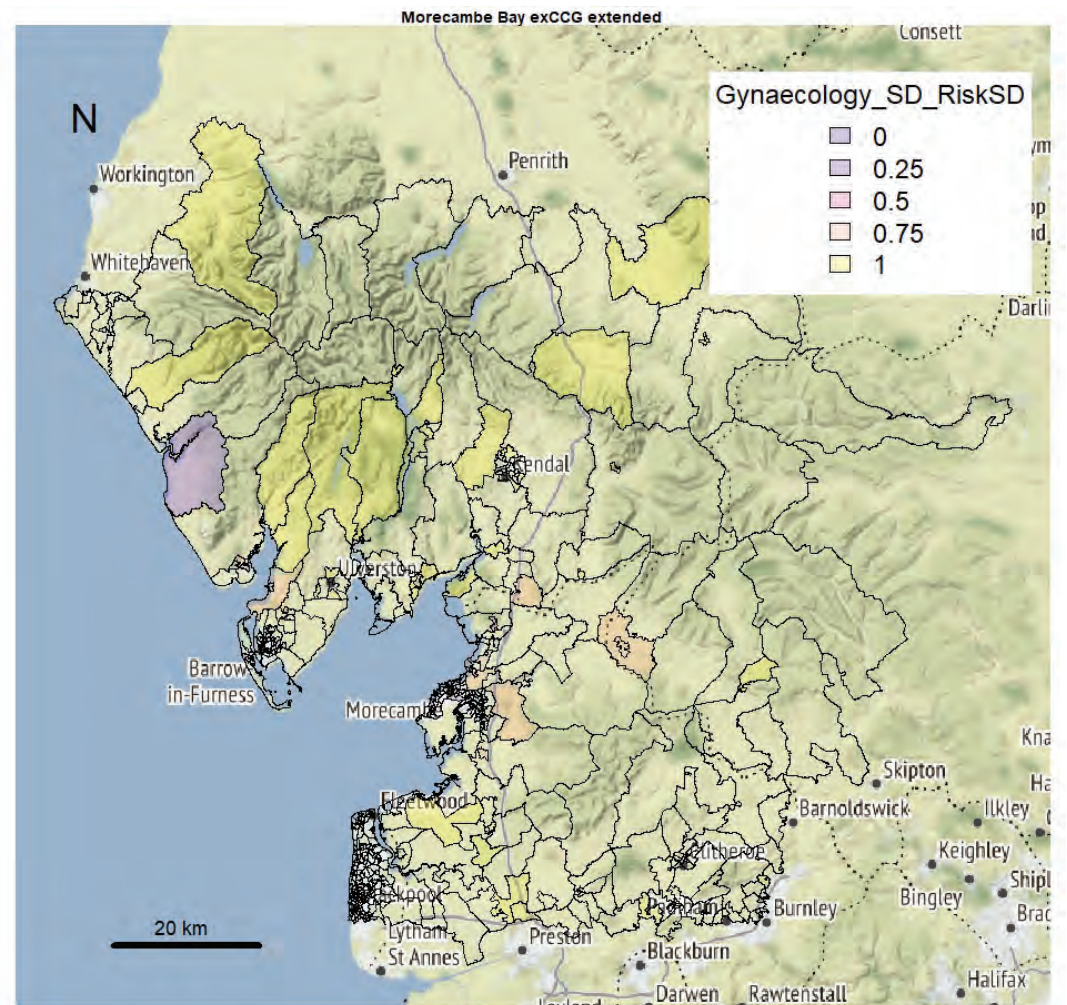

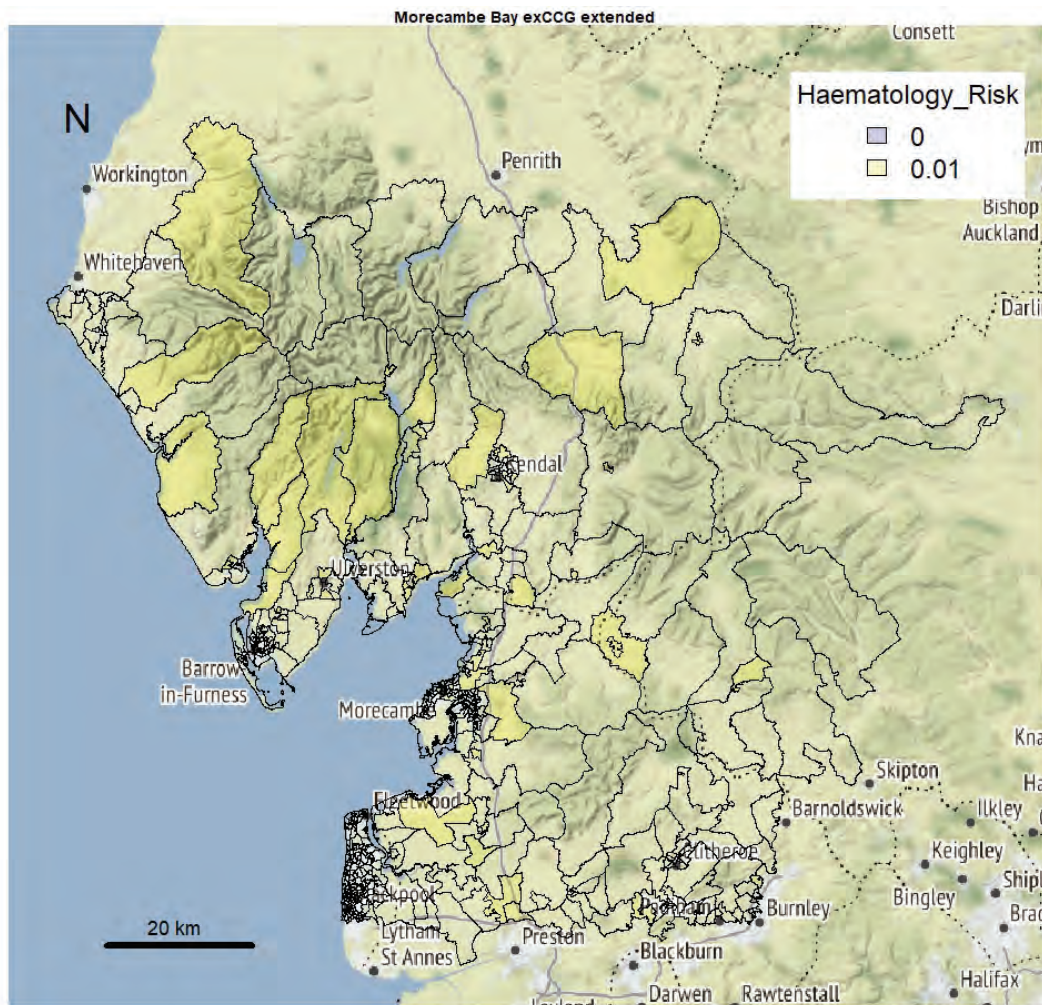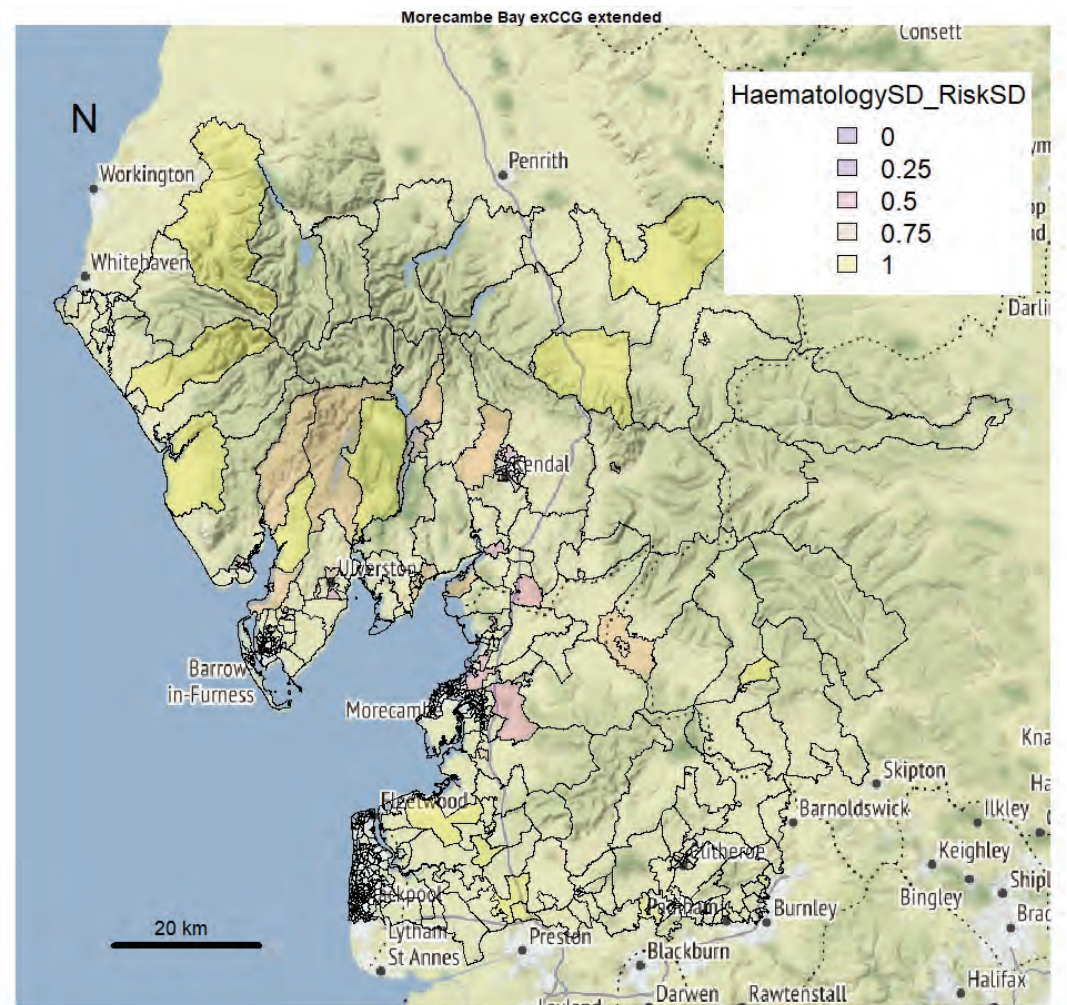

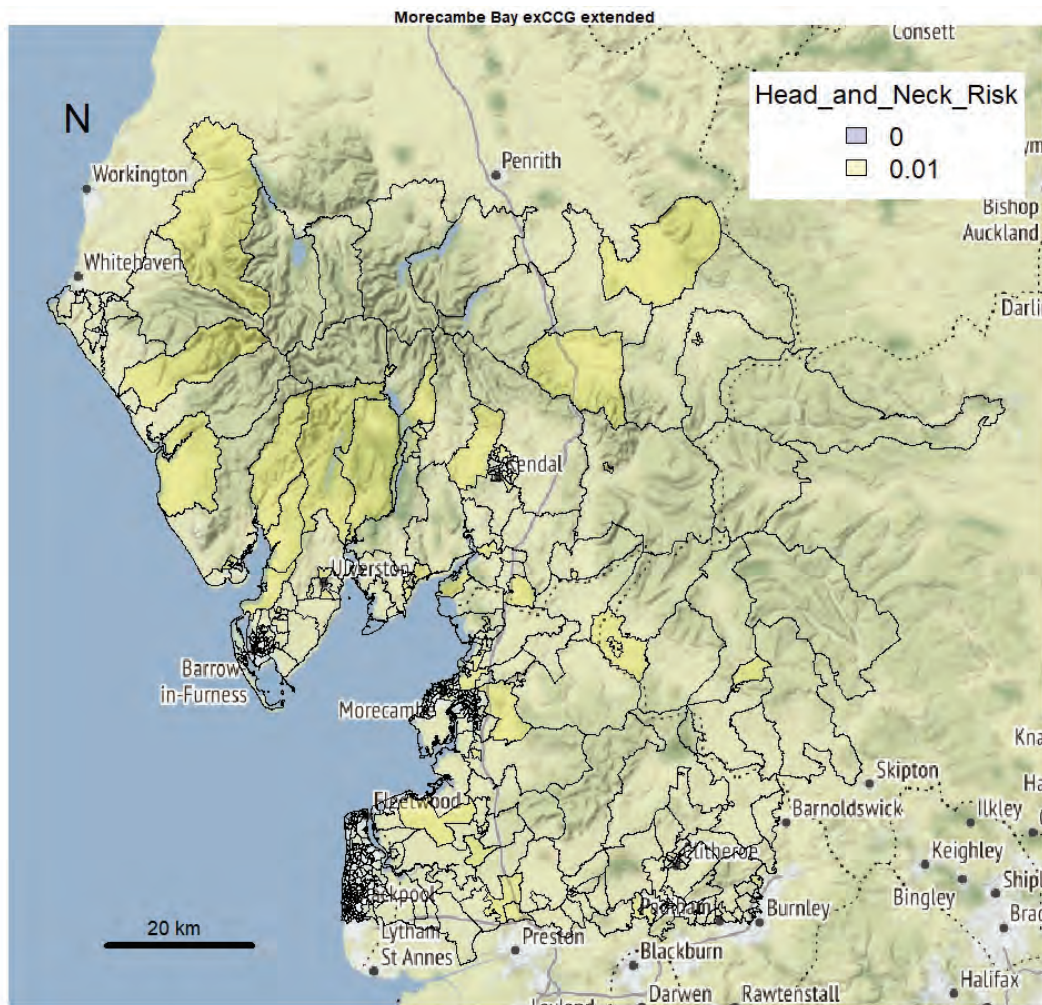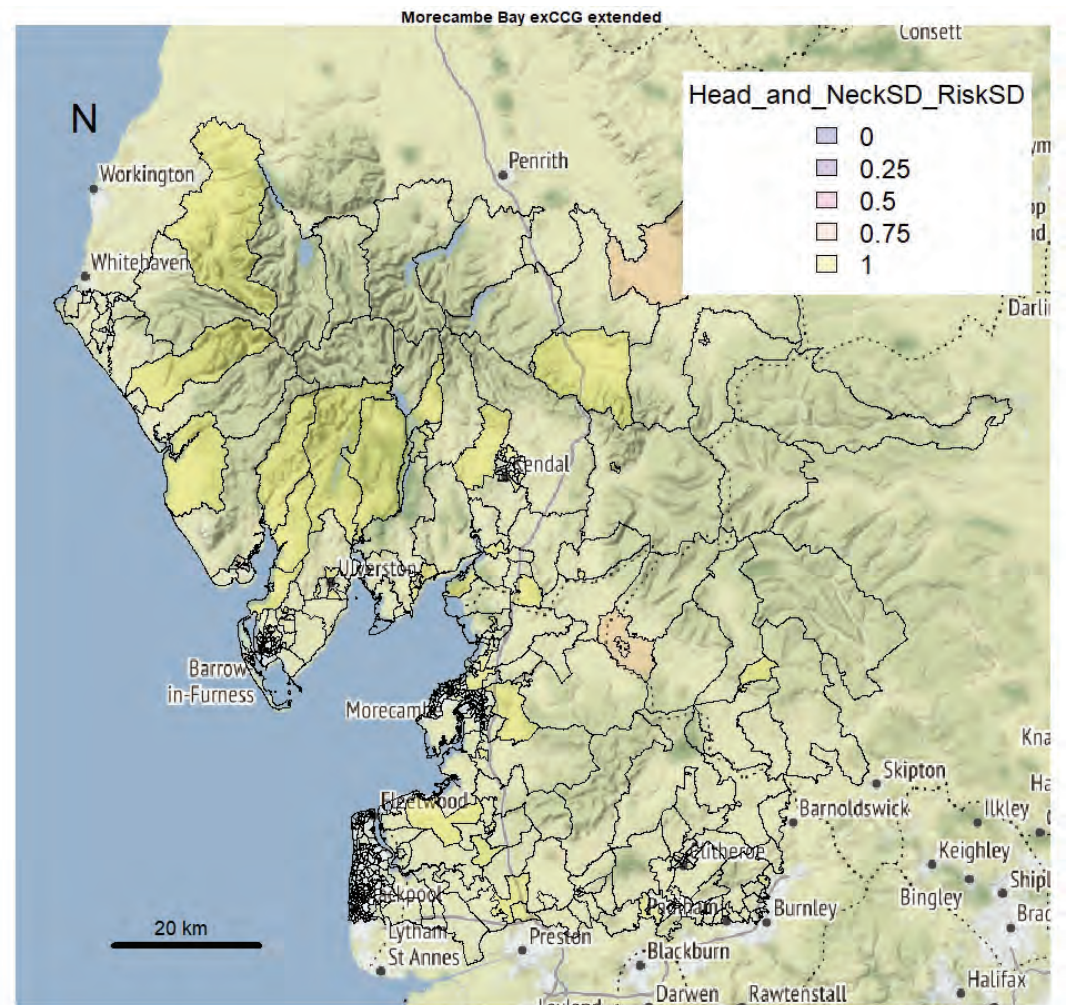

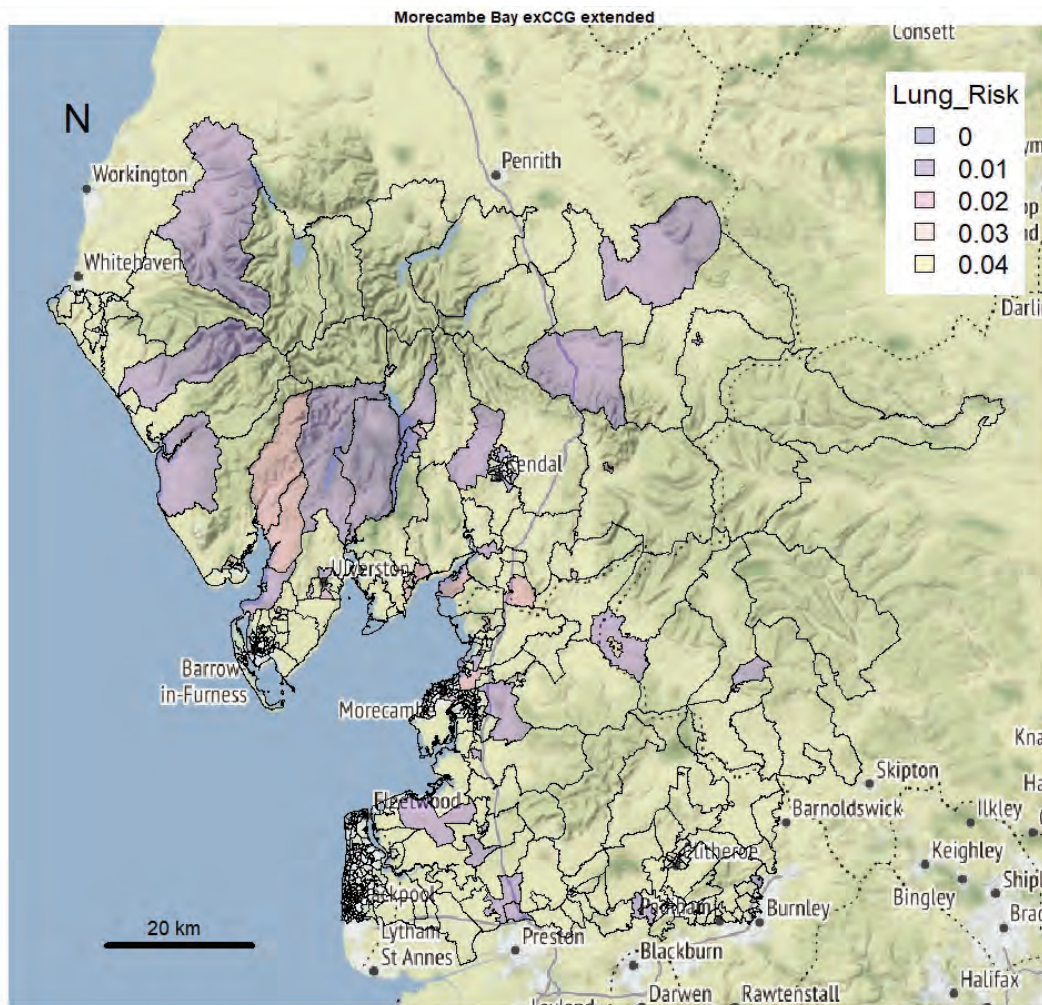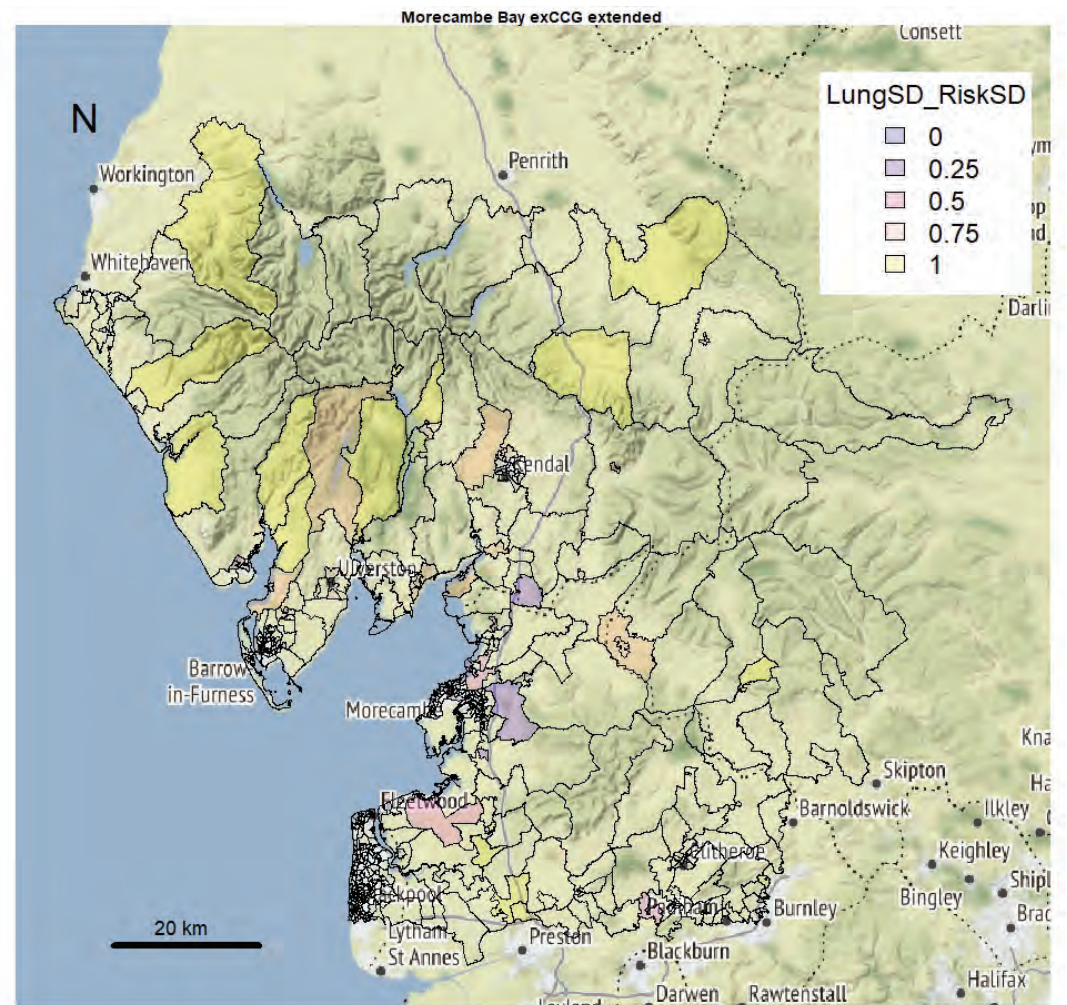



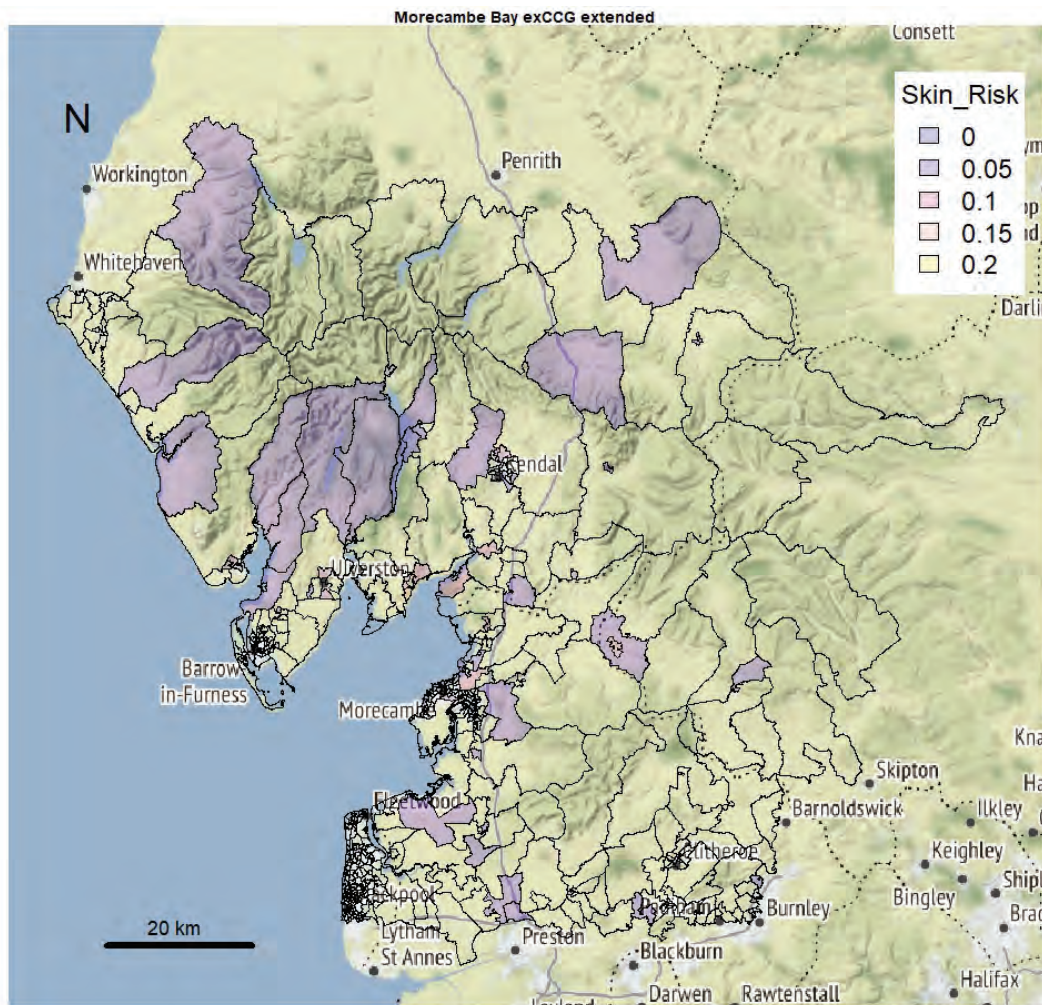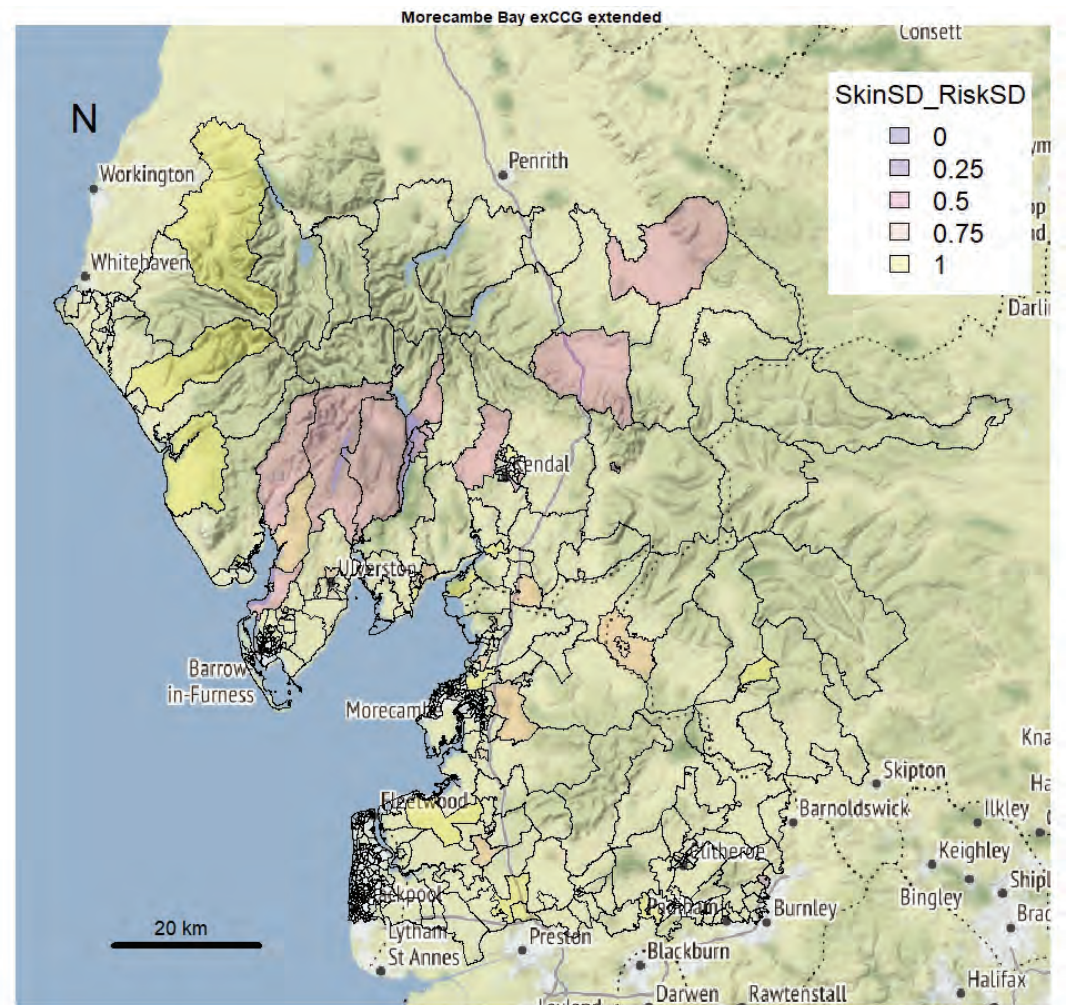

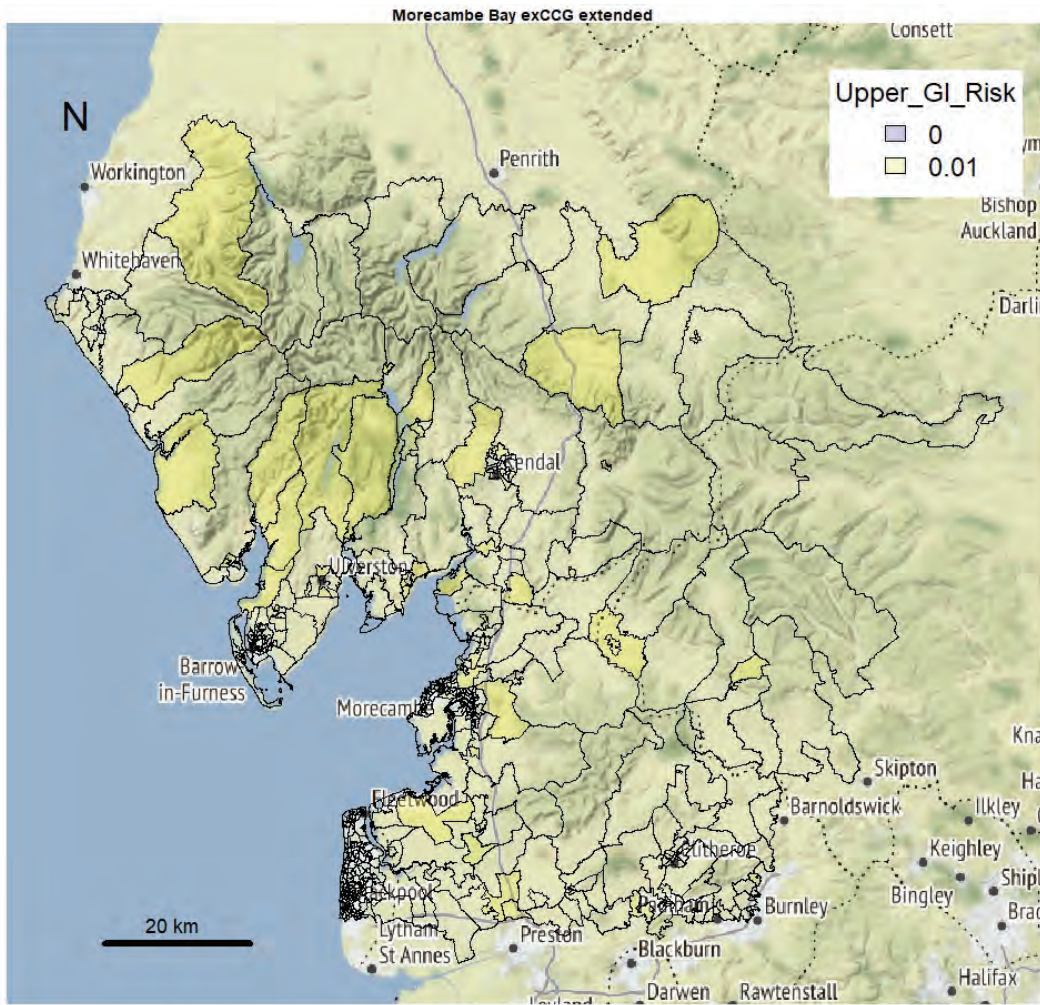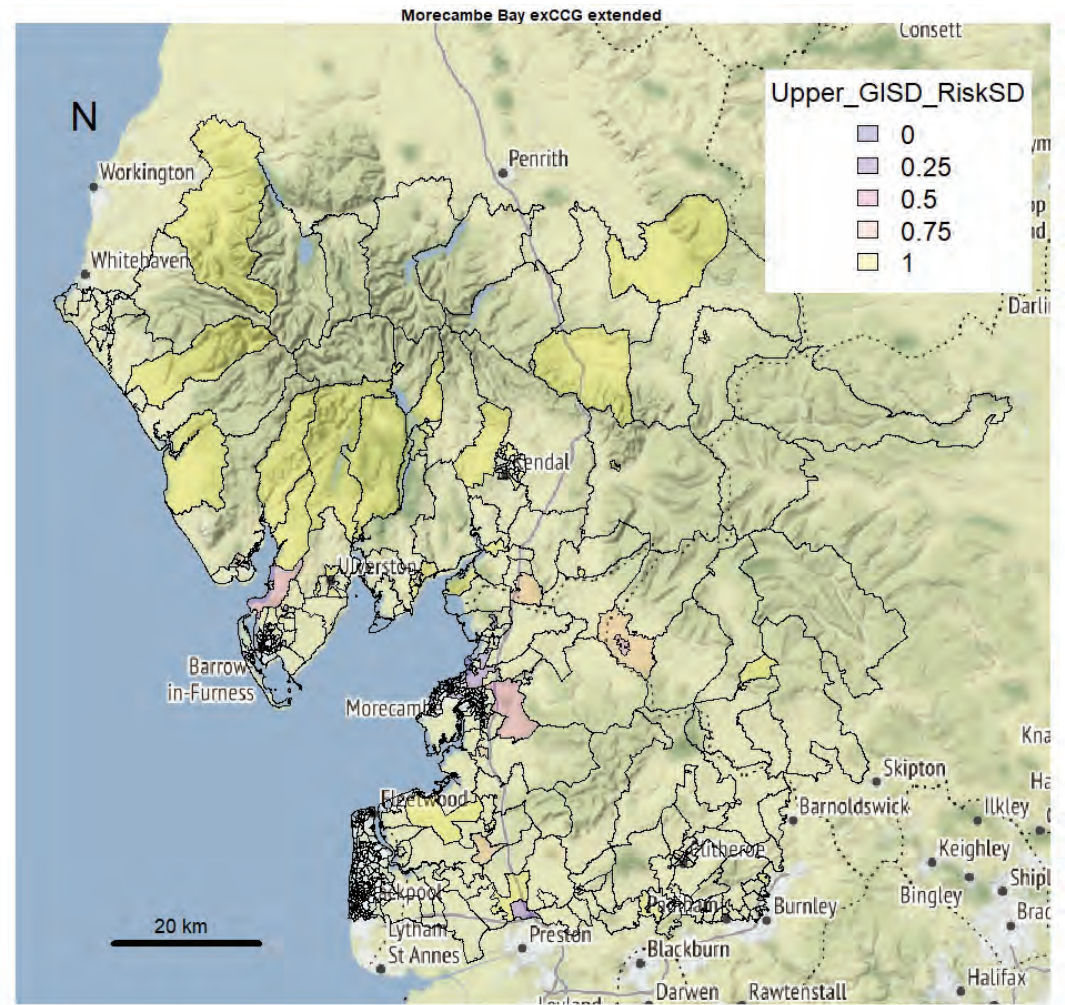

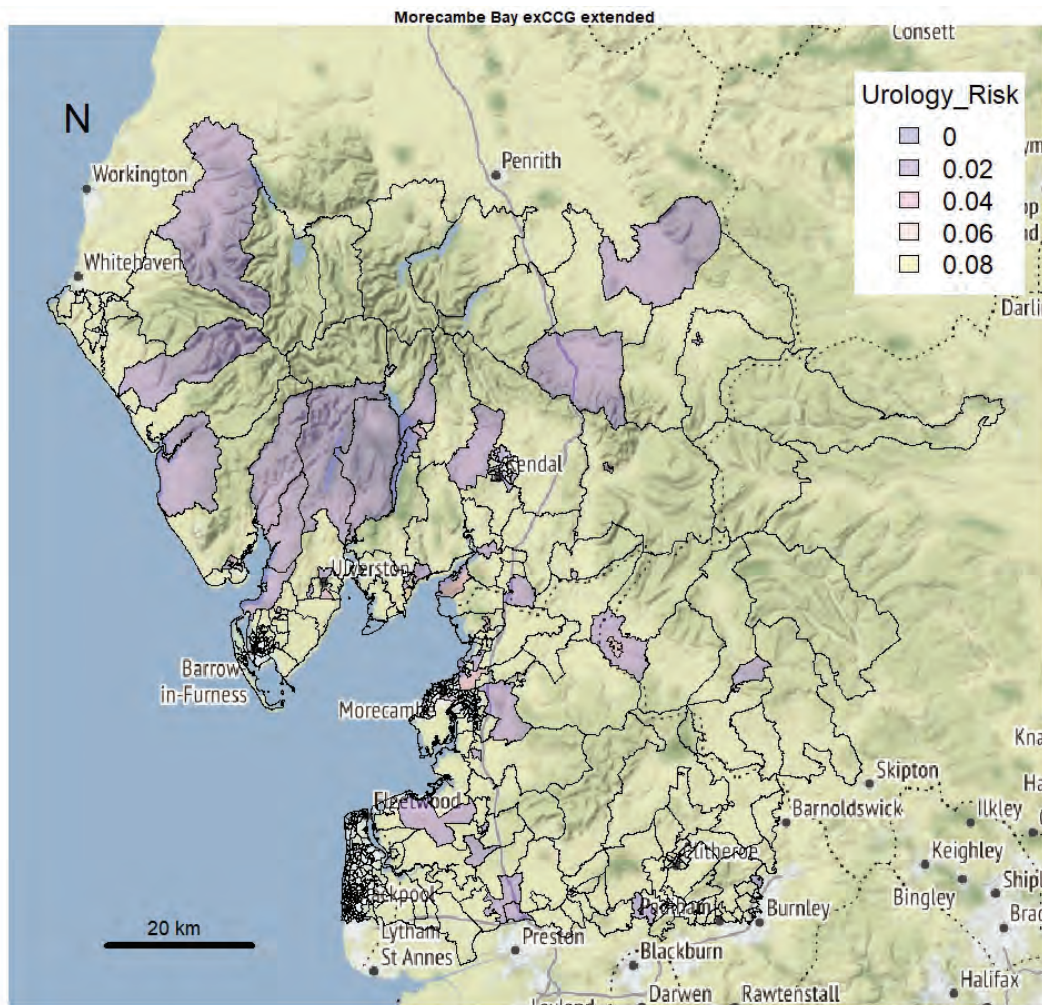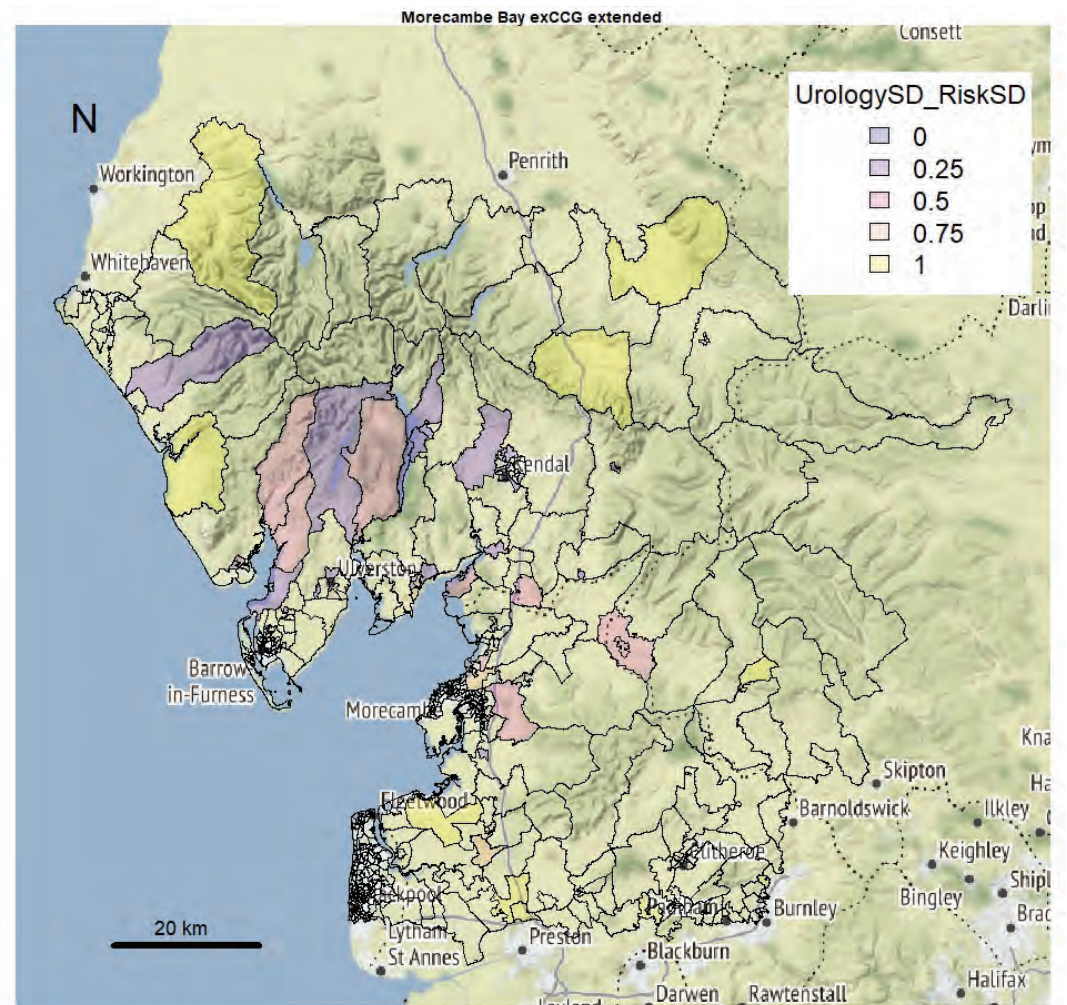

Lancaster and Morecambe

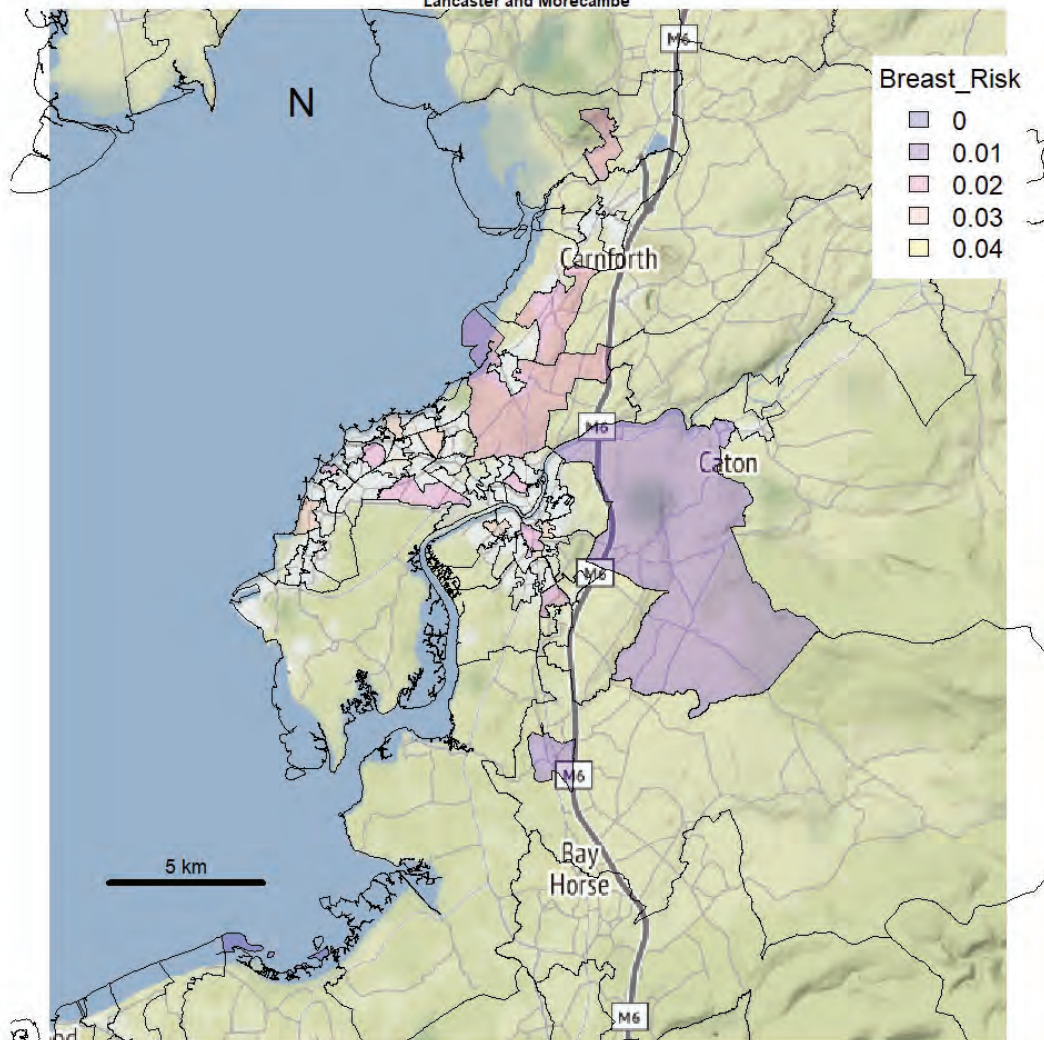

Lancaster and Morecambe

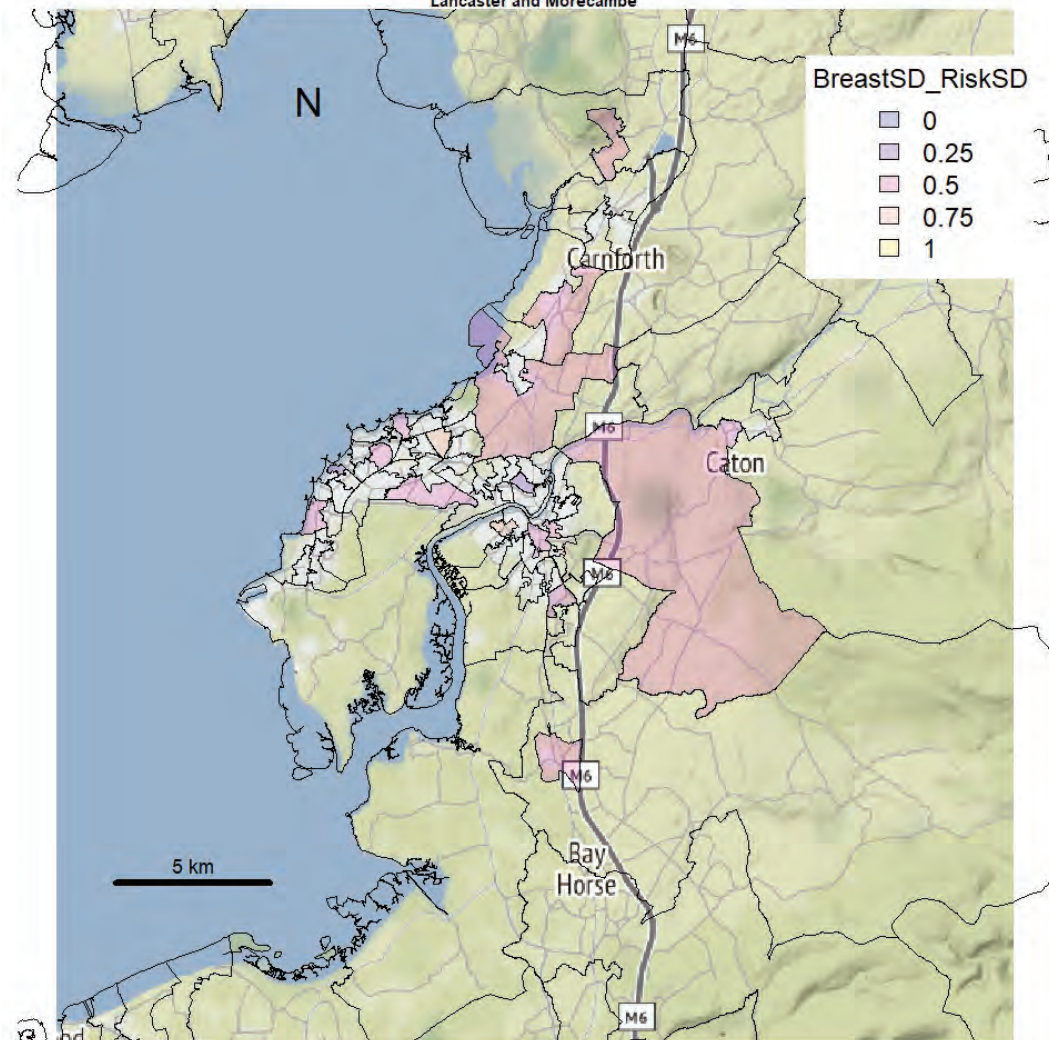

Lancaster and Morecambe

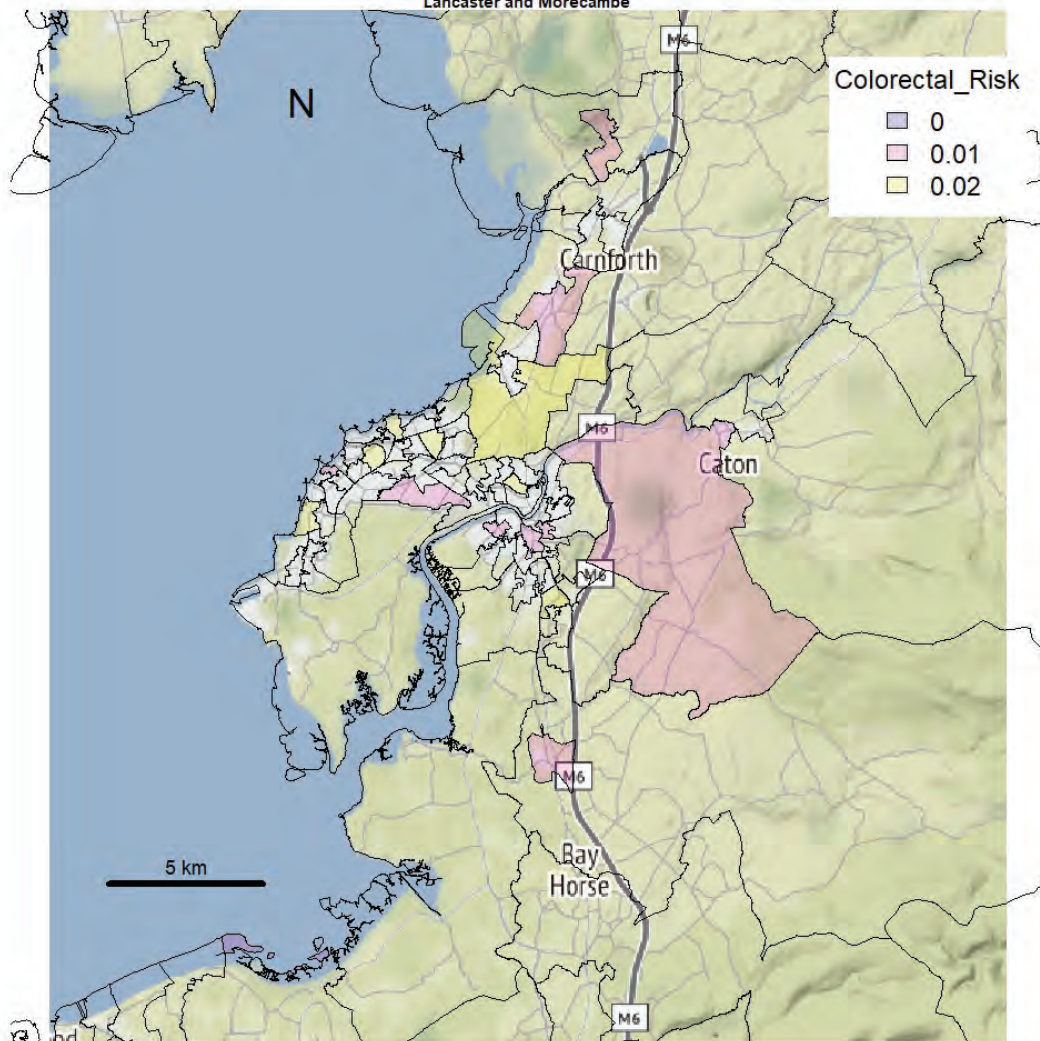

Lancaster and Morecambe

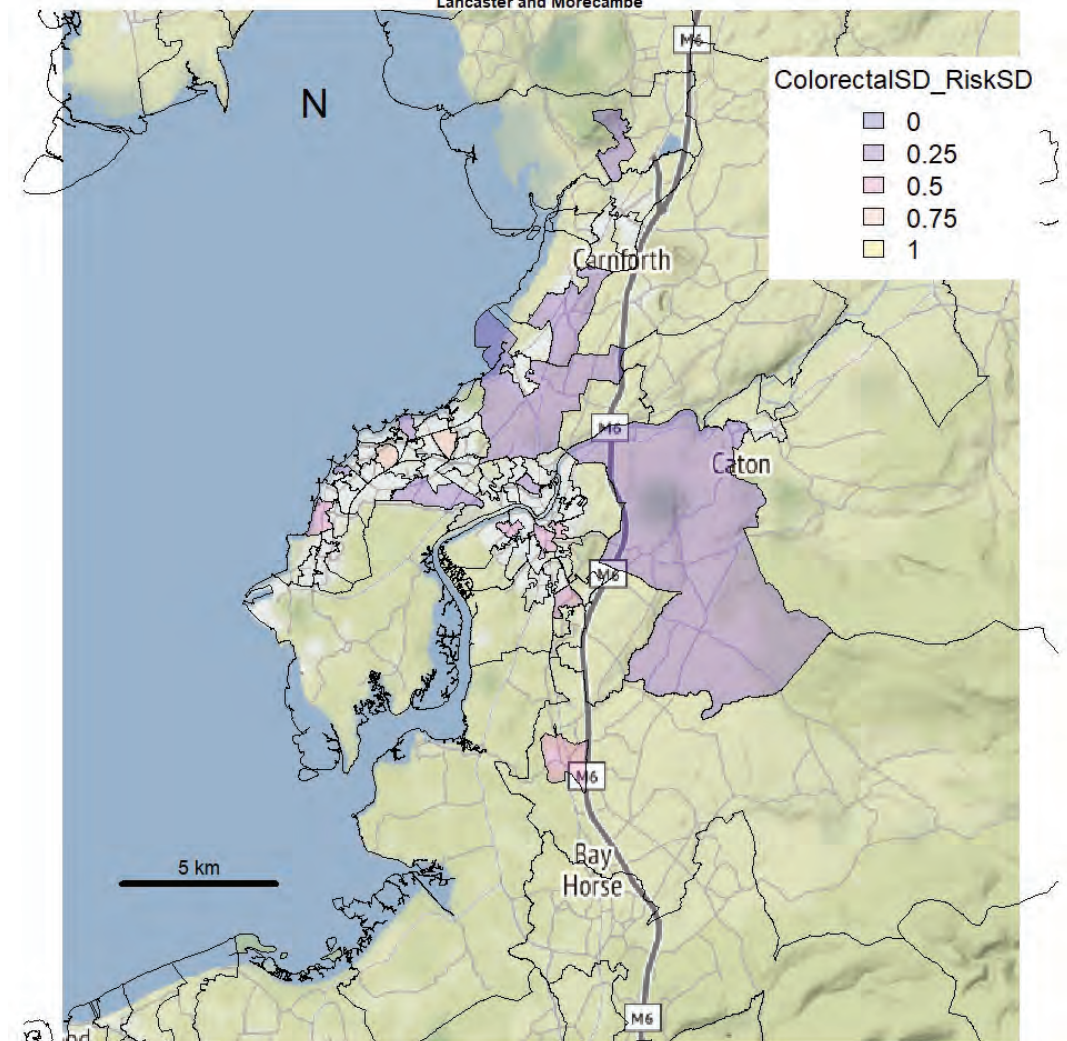

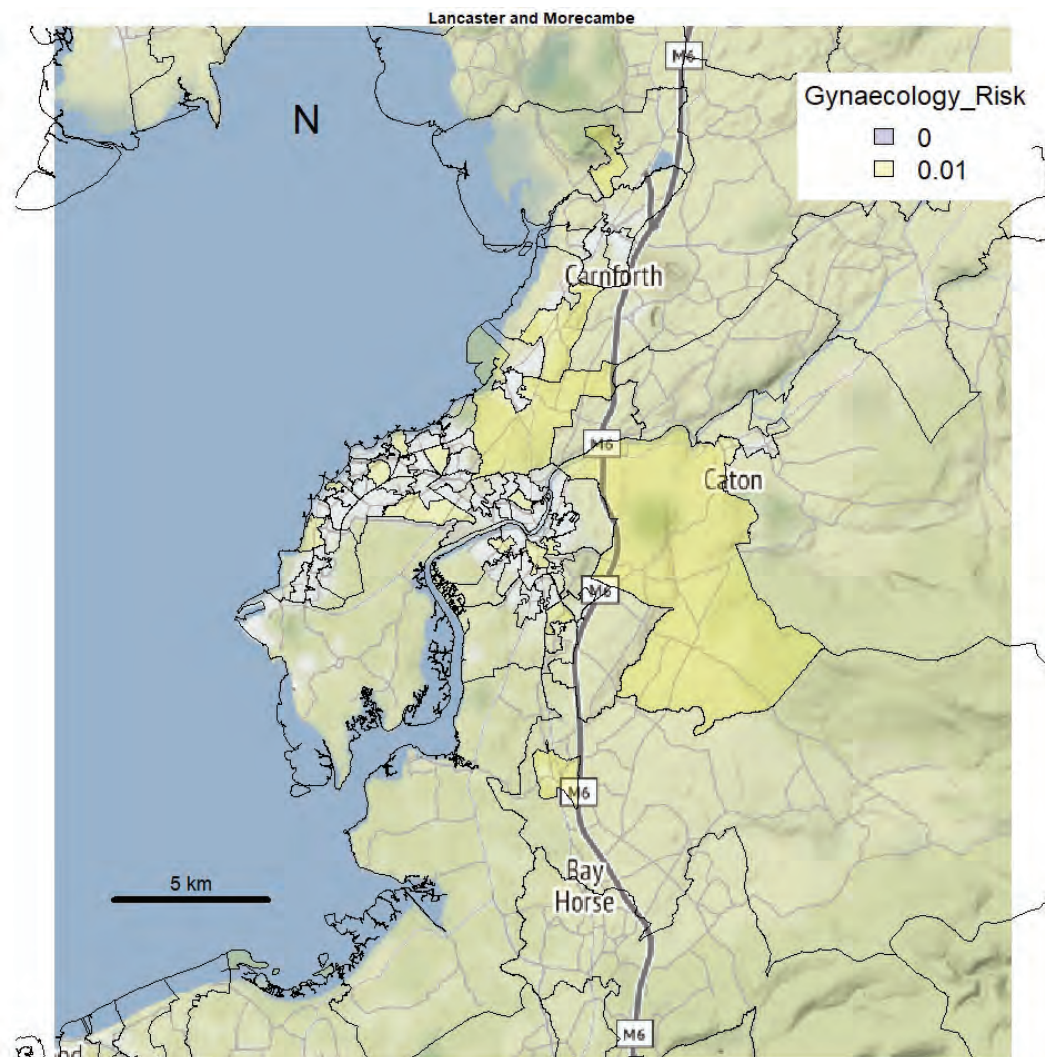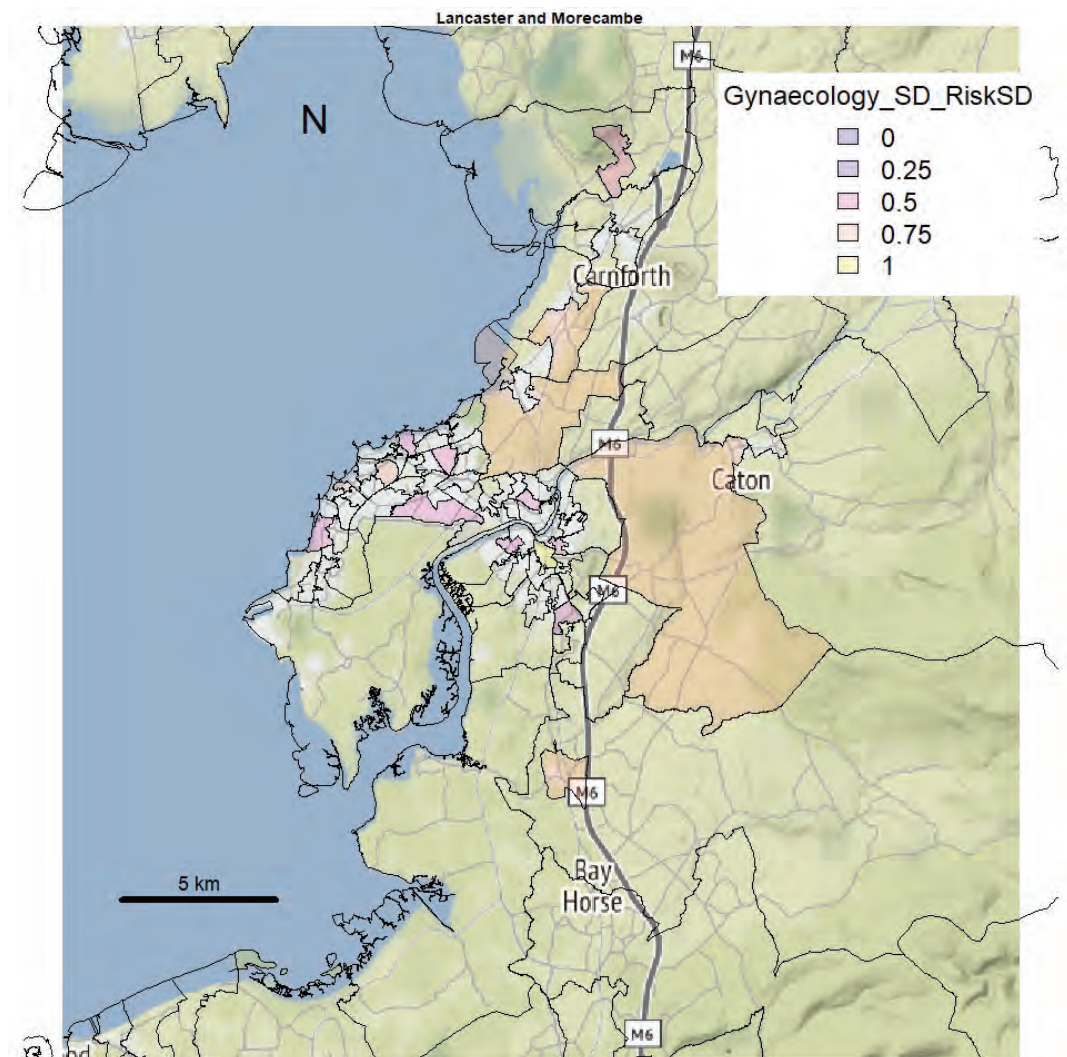

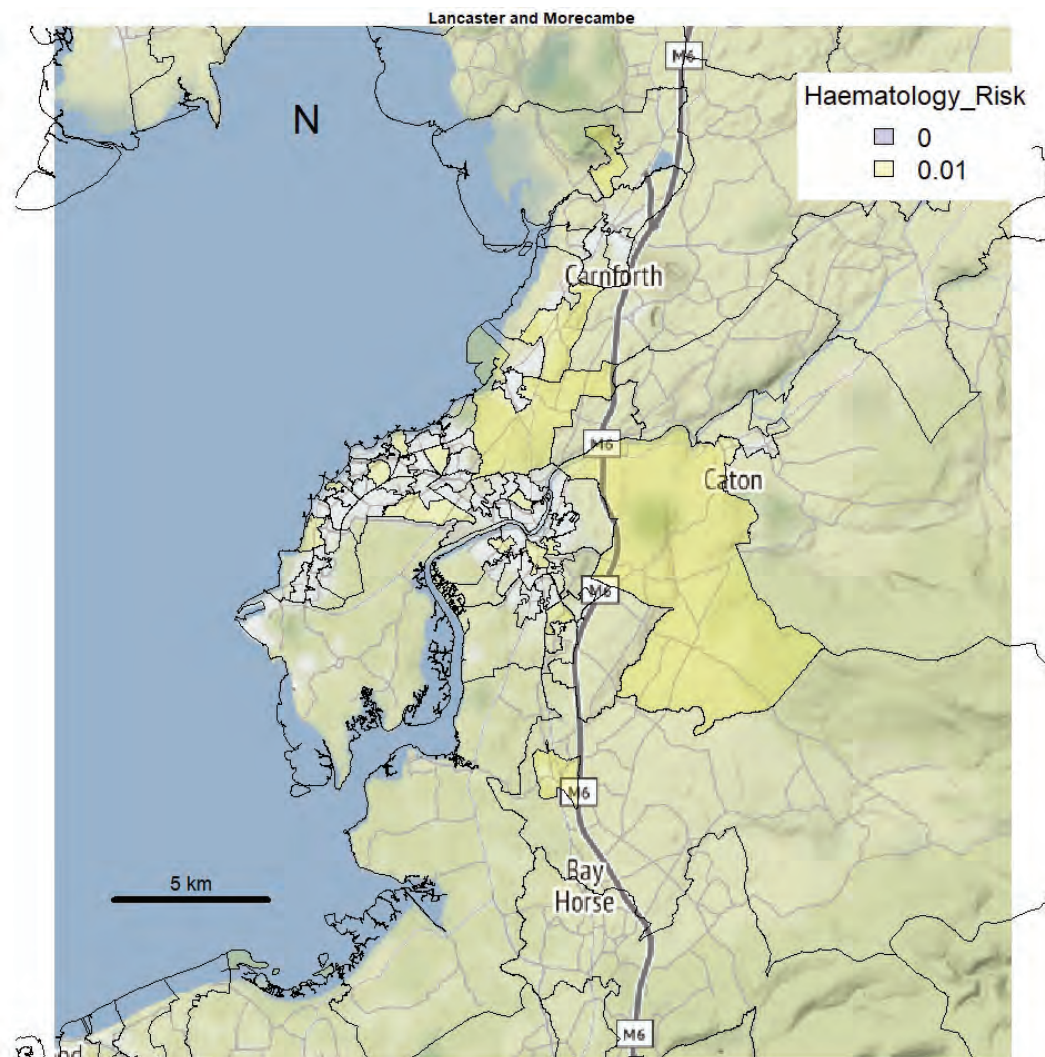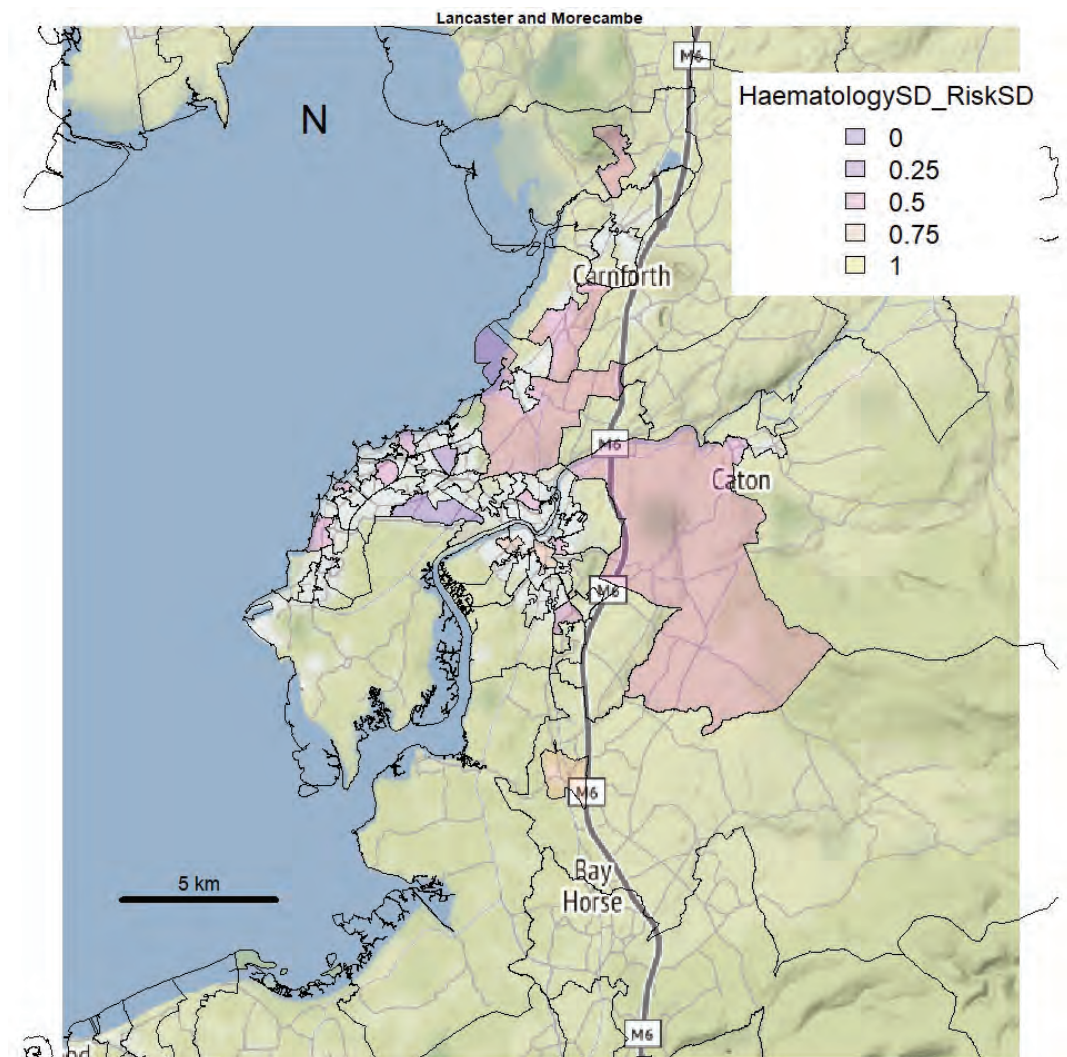

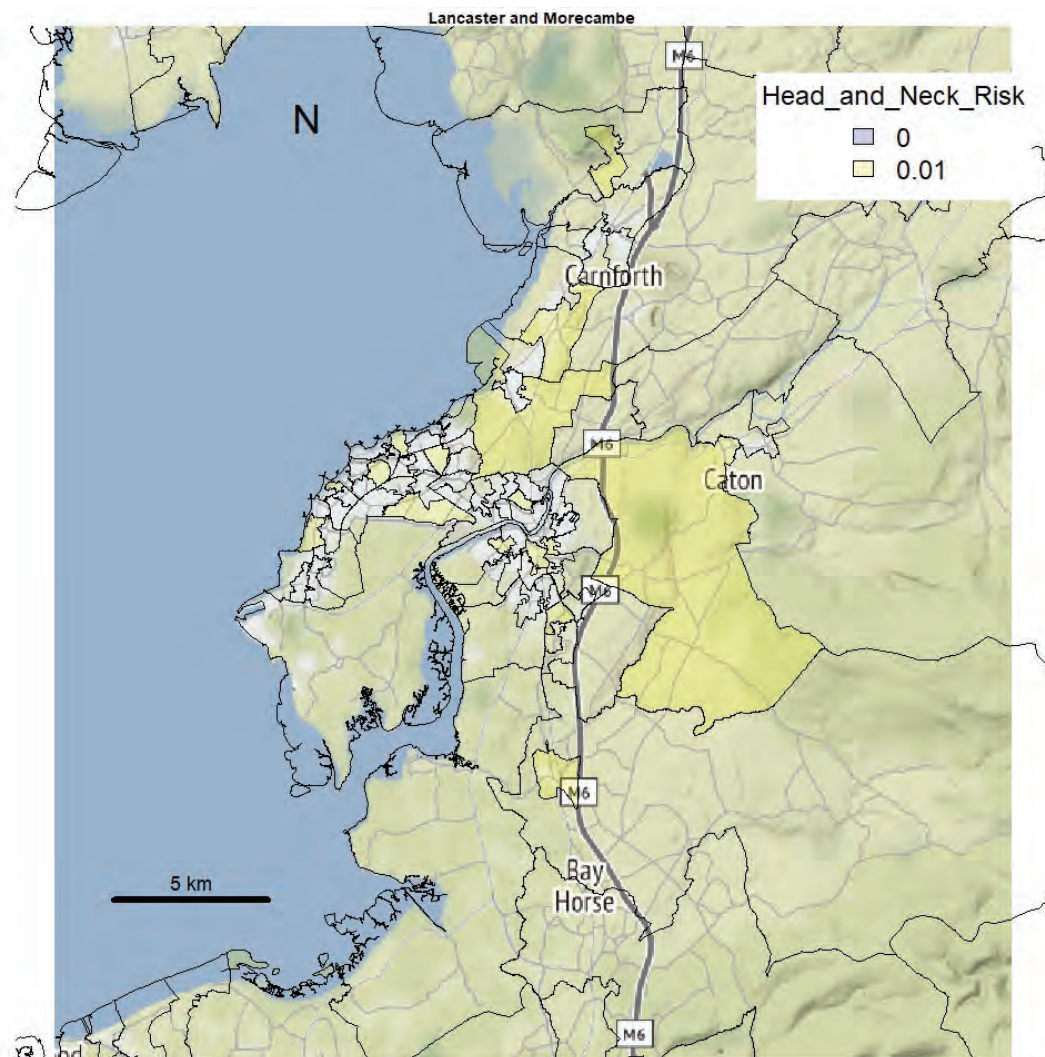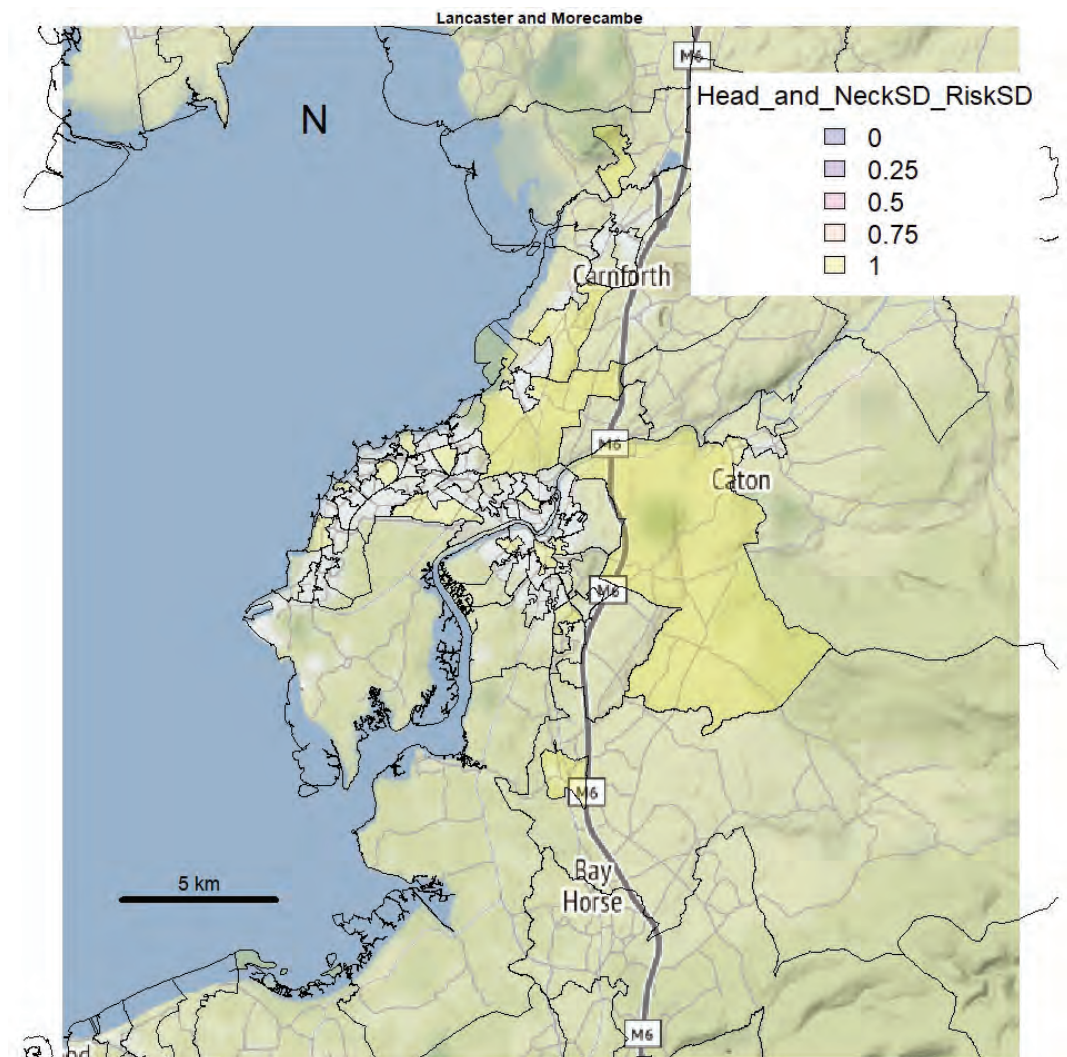



Lancaster and Morecambe

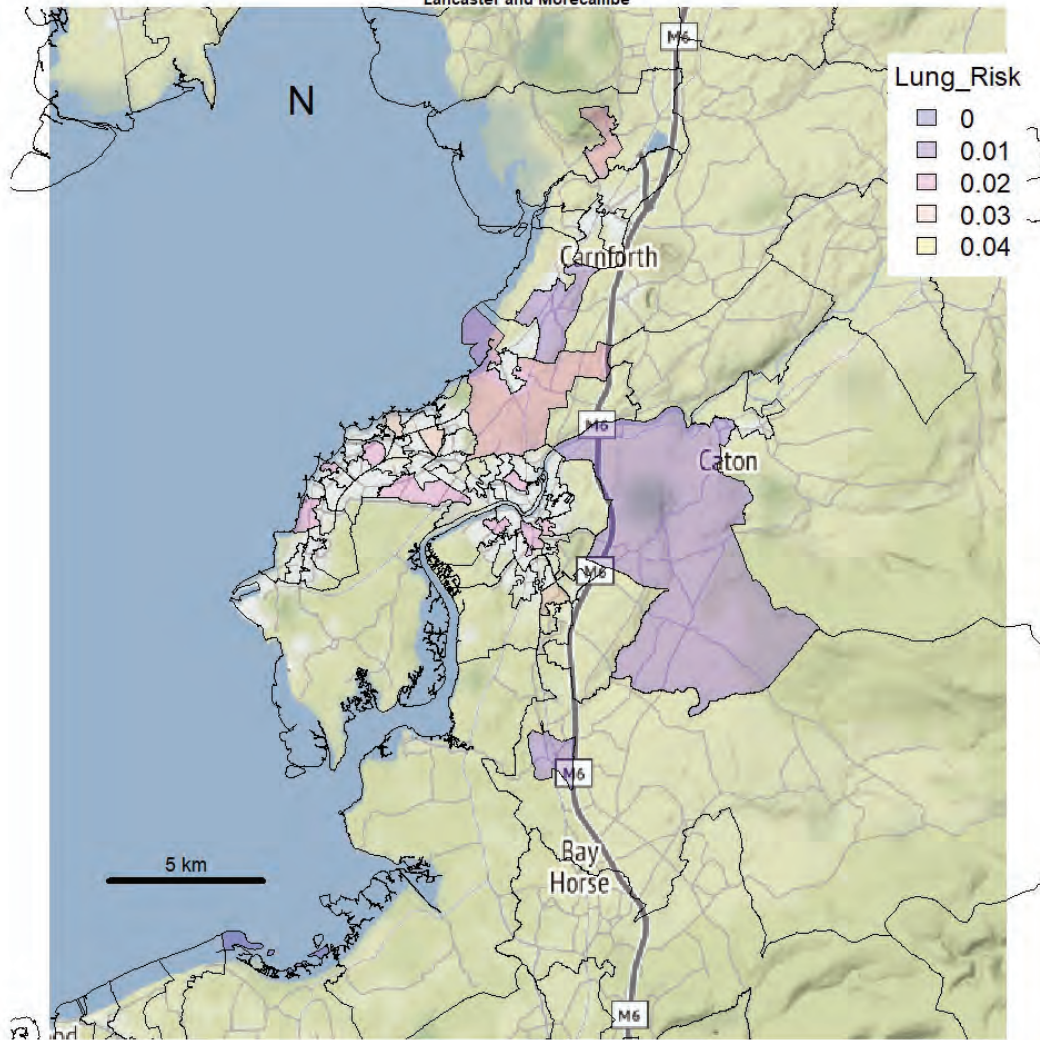

Lancaster and Morecambe

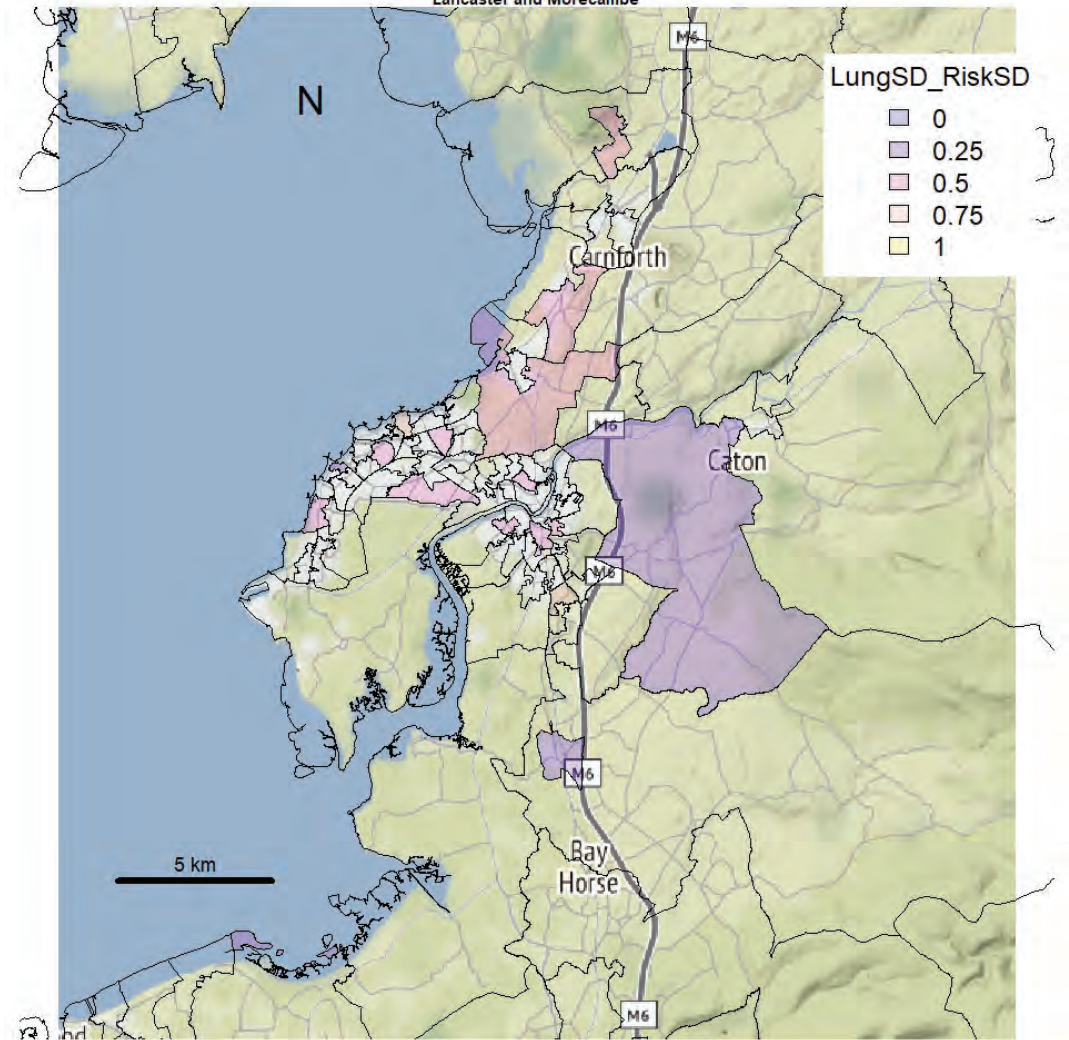

Lancaster and Morecambe

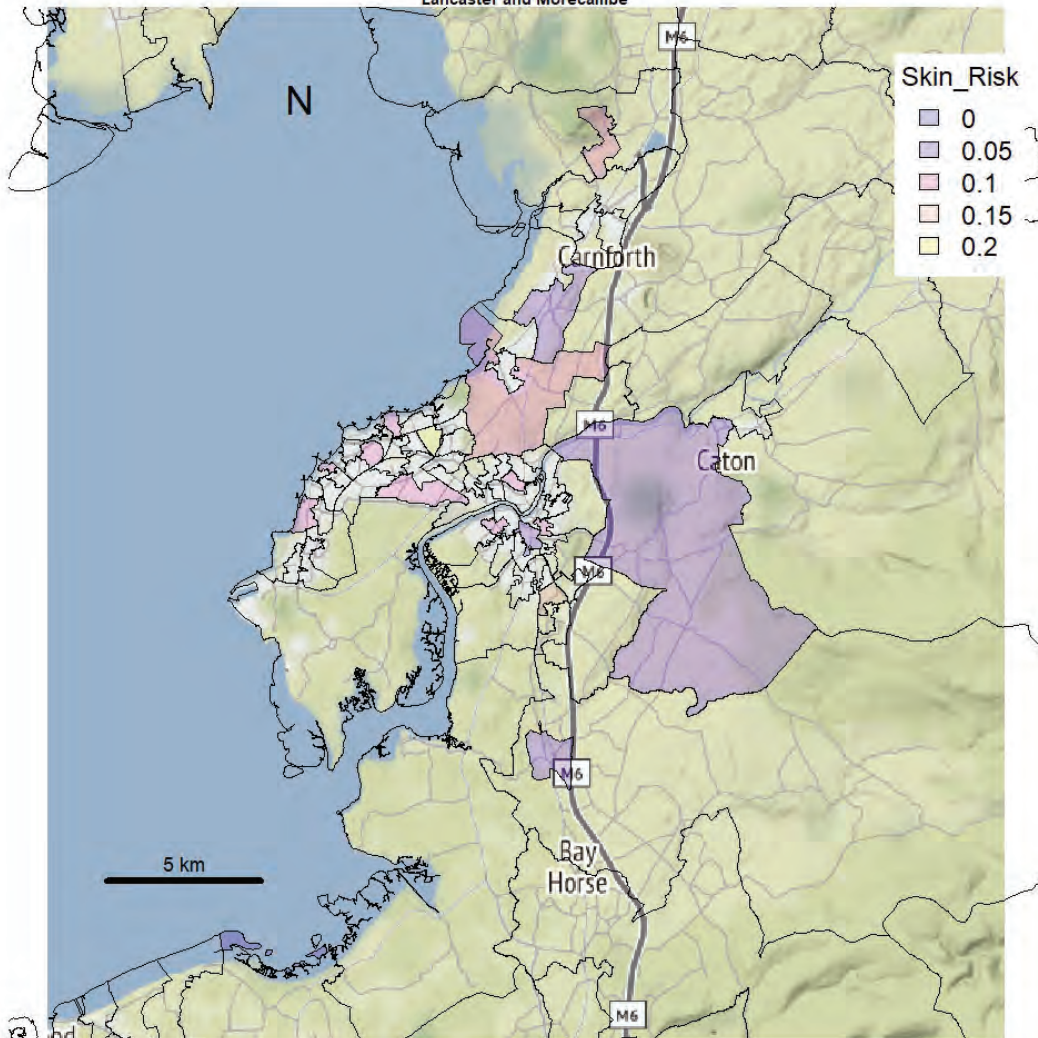

Lancaster and Morecambe

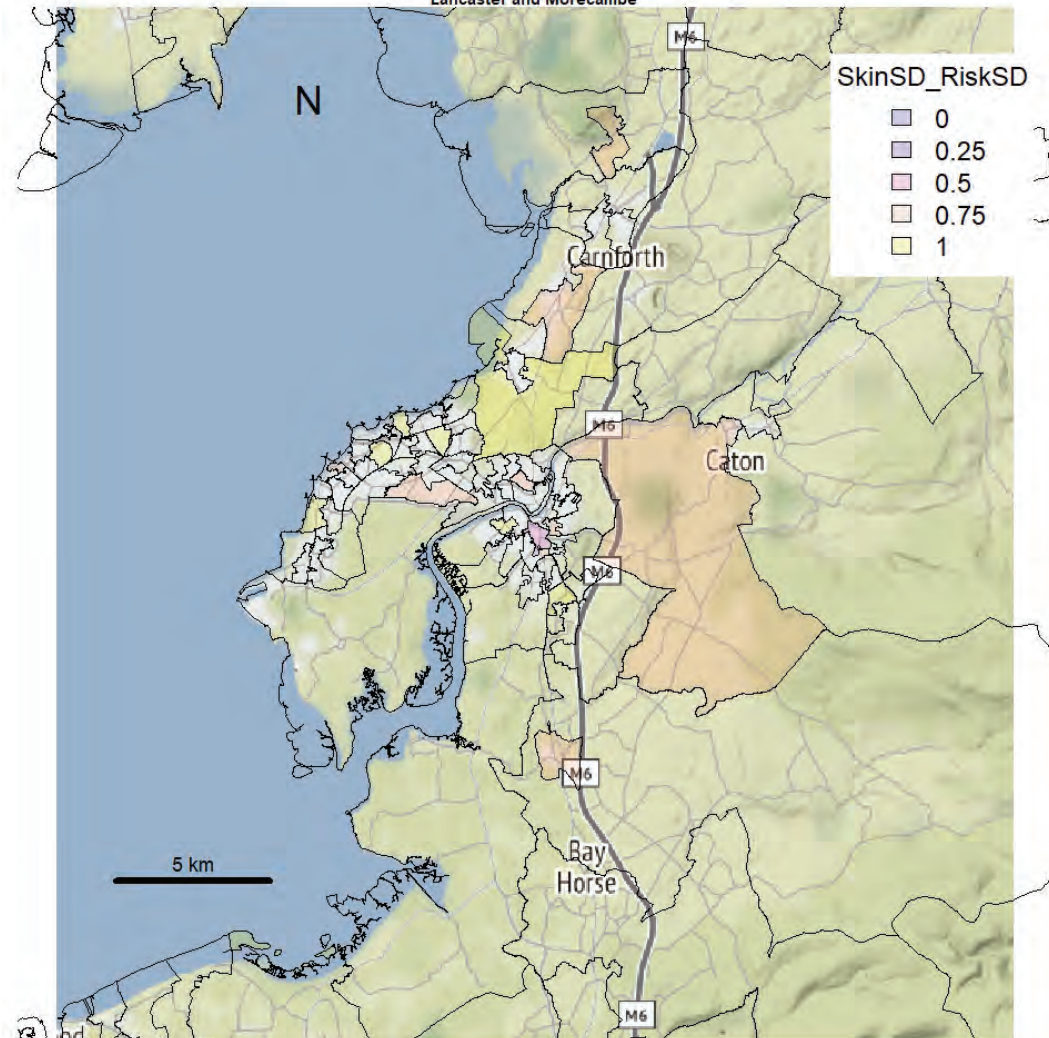

Lancaster and Morecambe

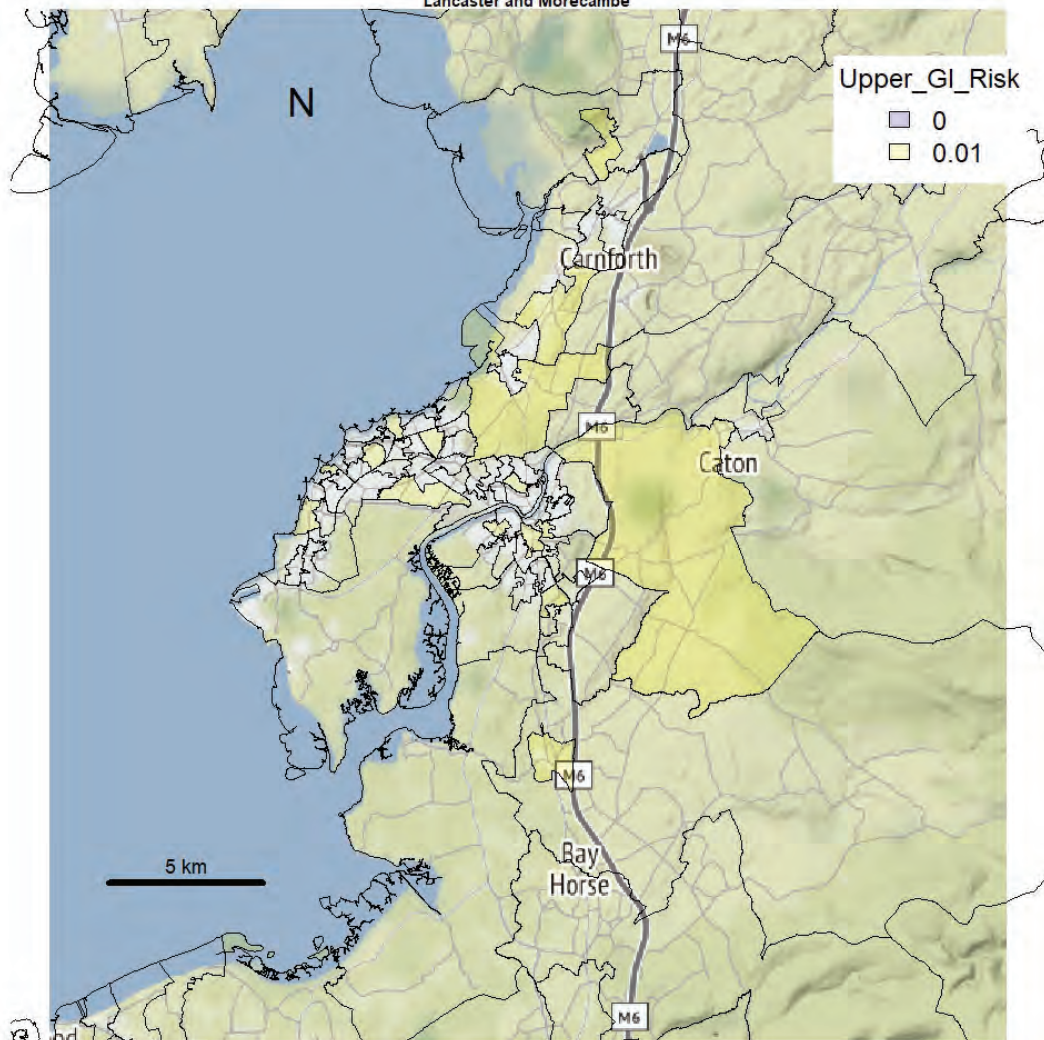

Lancaster and Morecambe

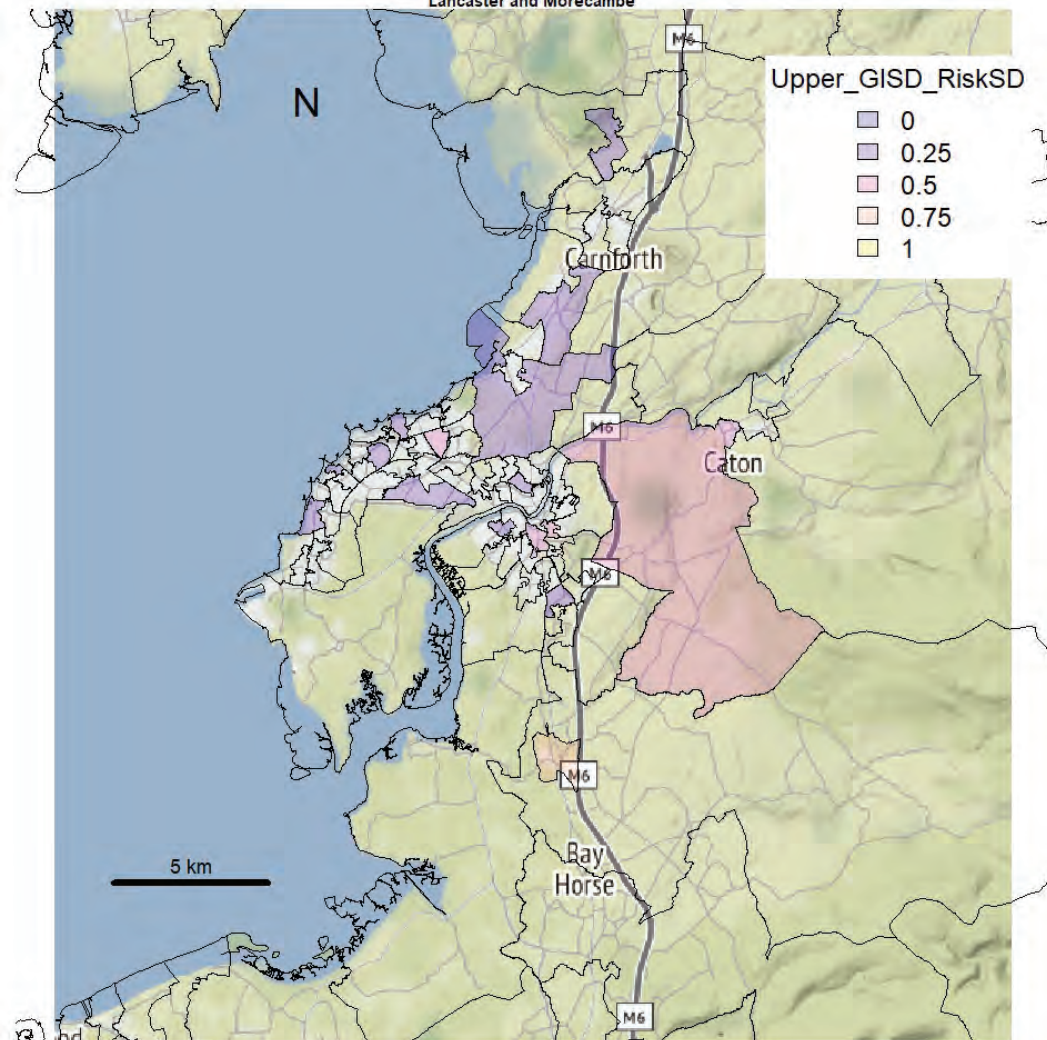

Lancaster and Morecambe

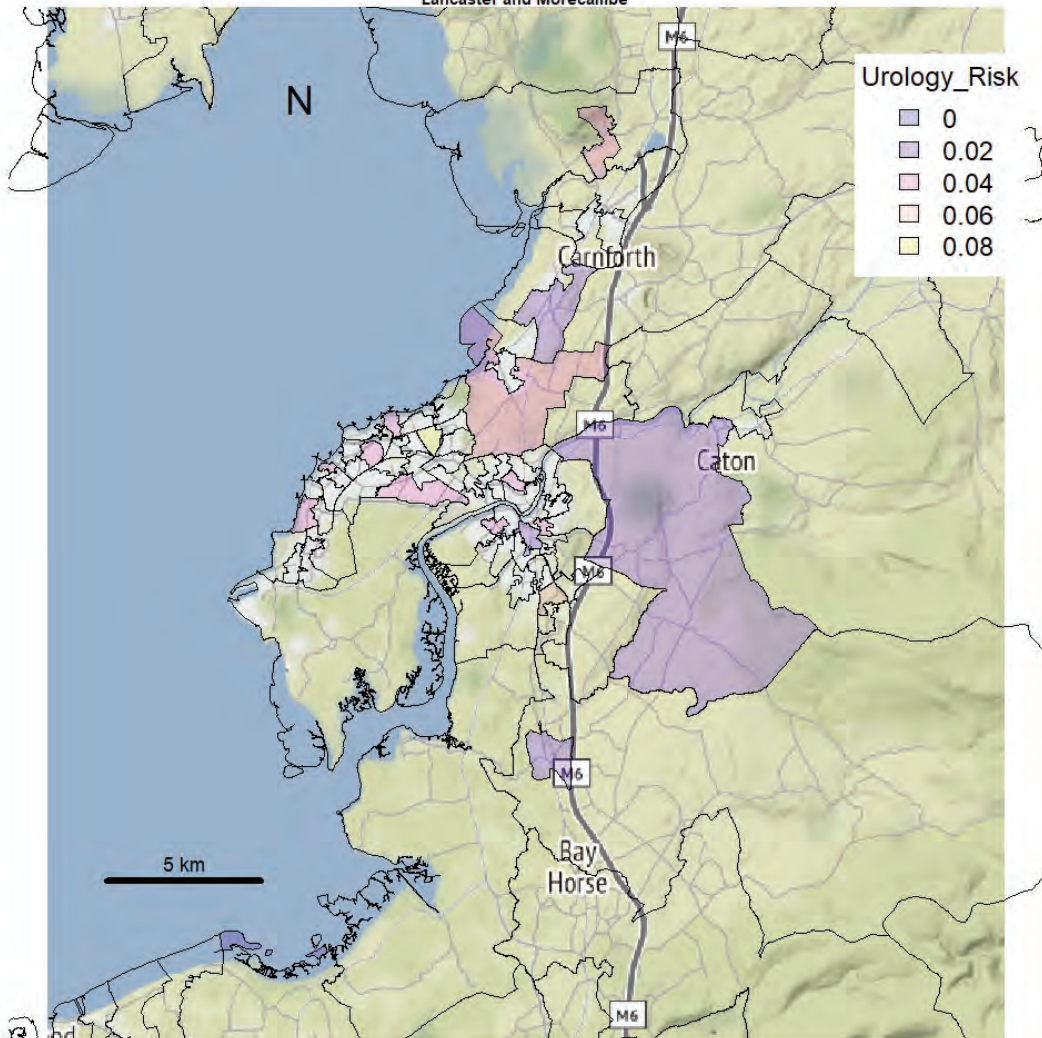

Lancaster and Morecambe

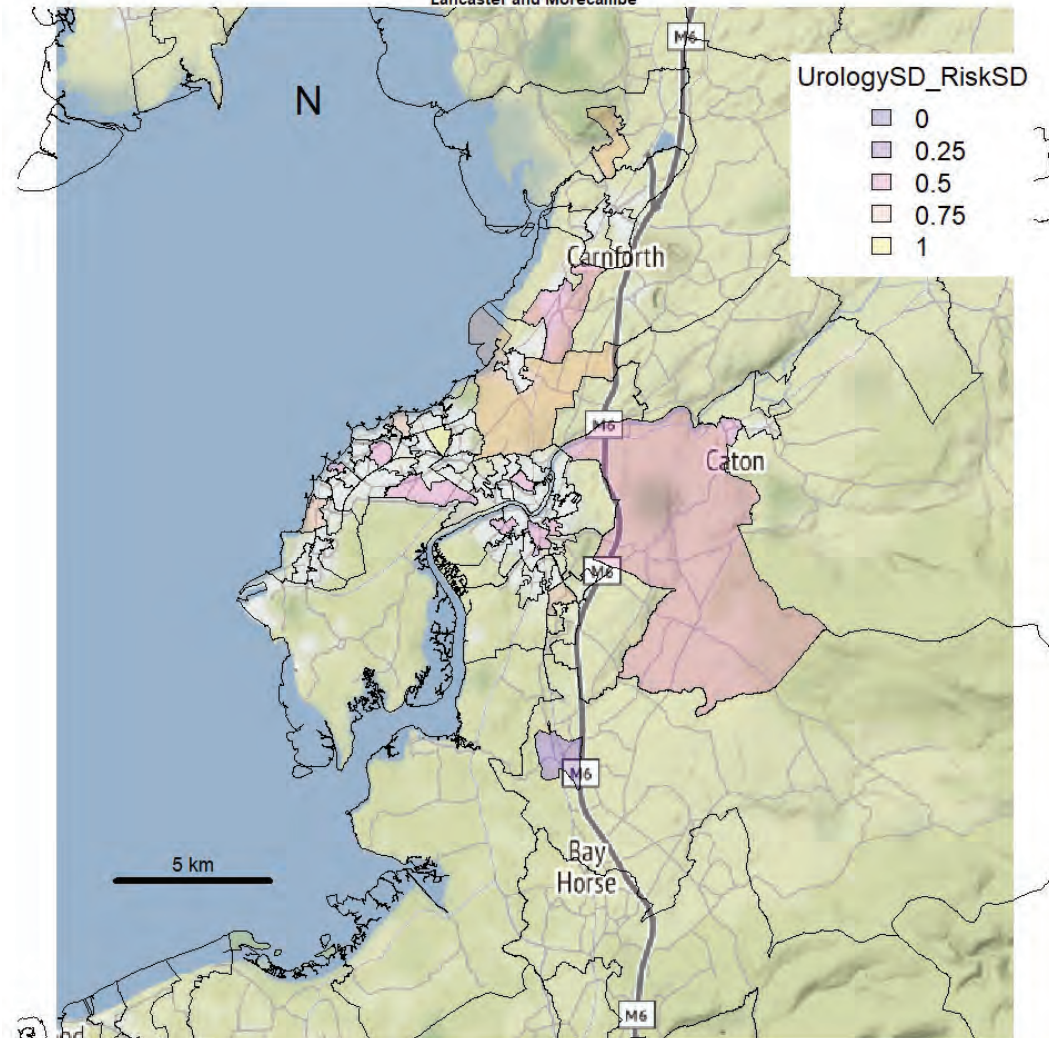

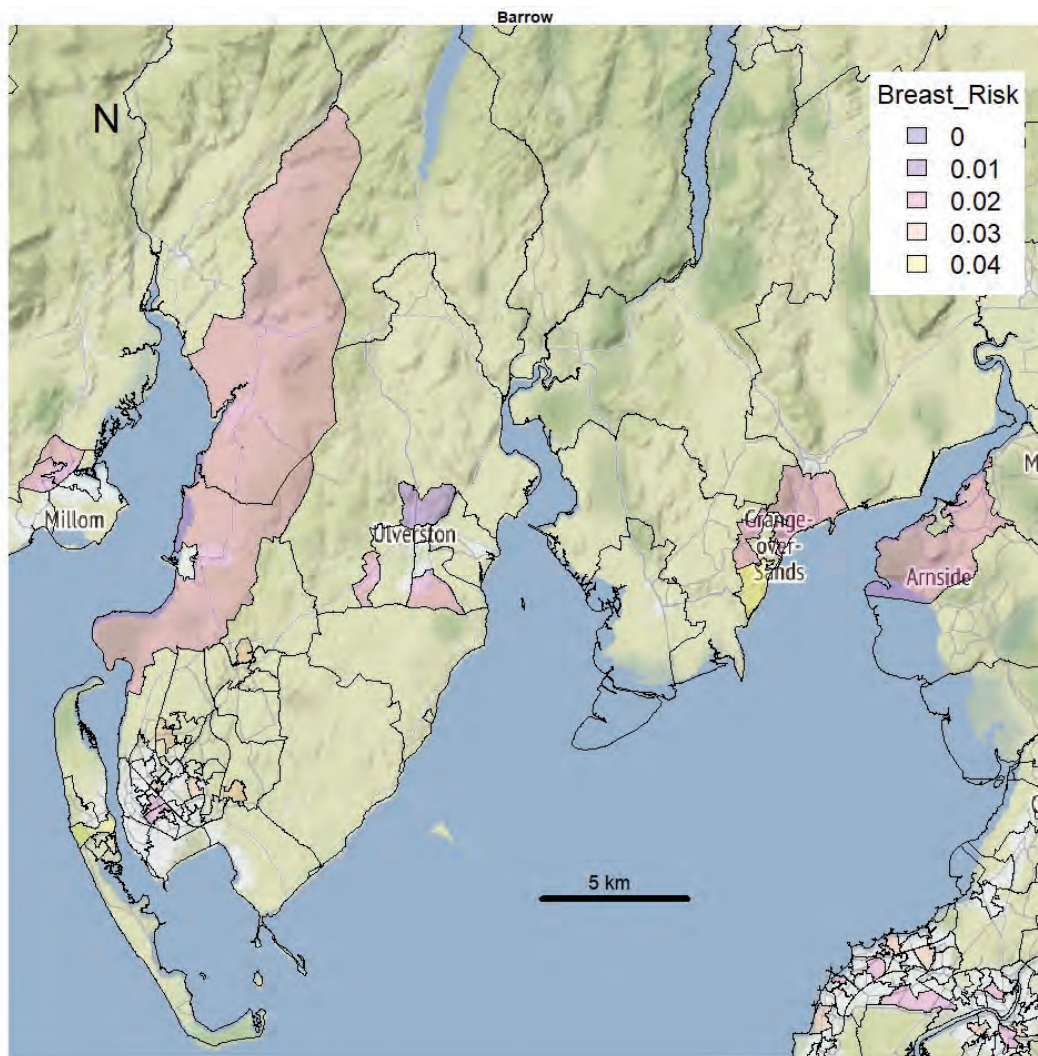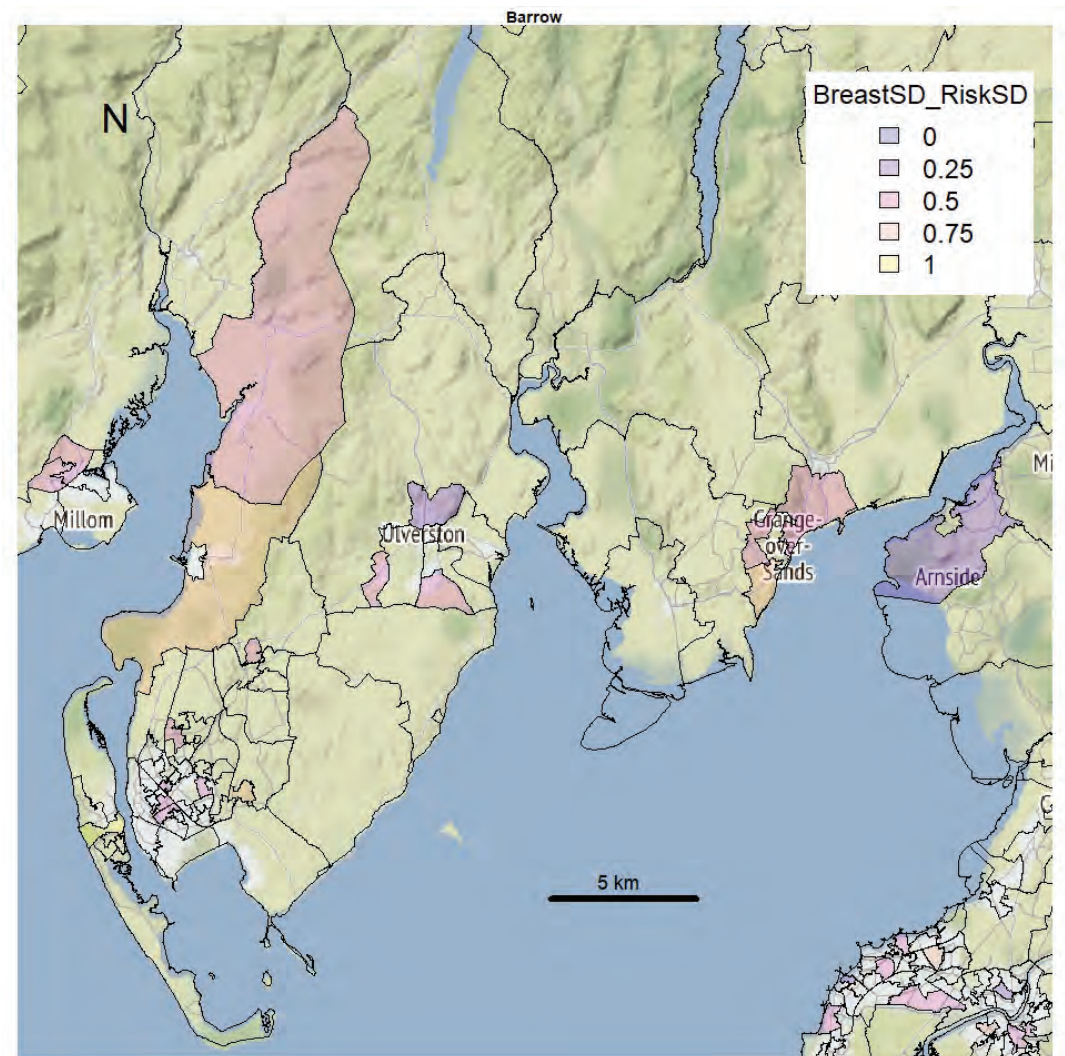

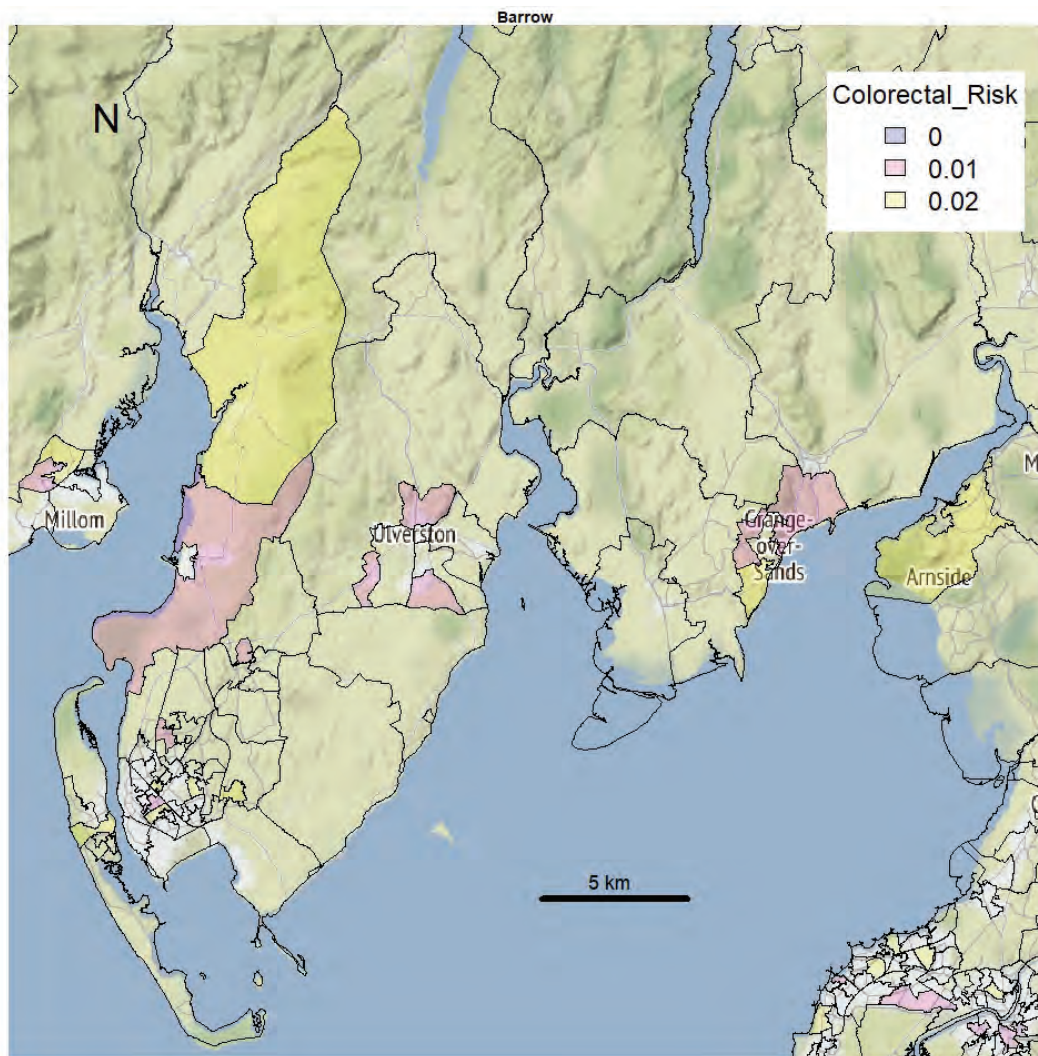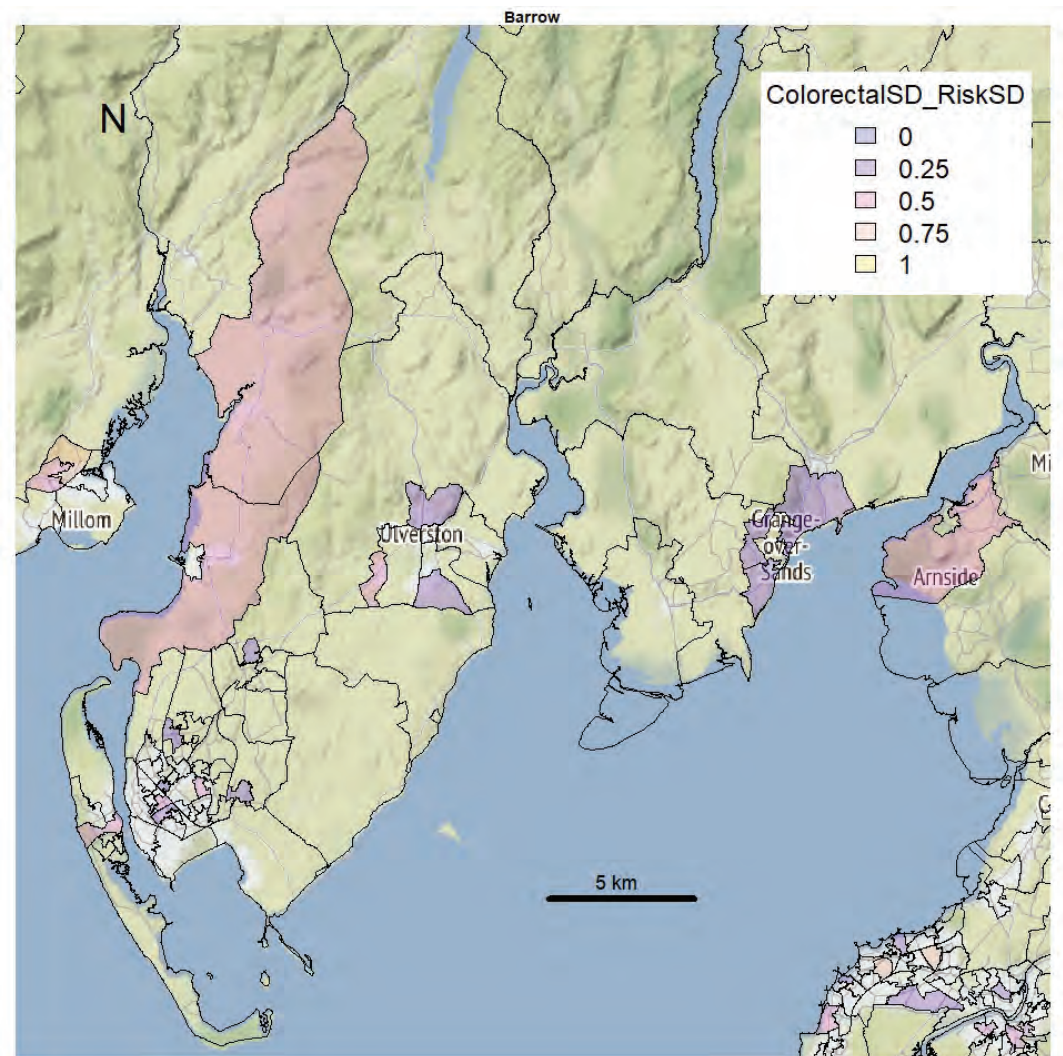

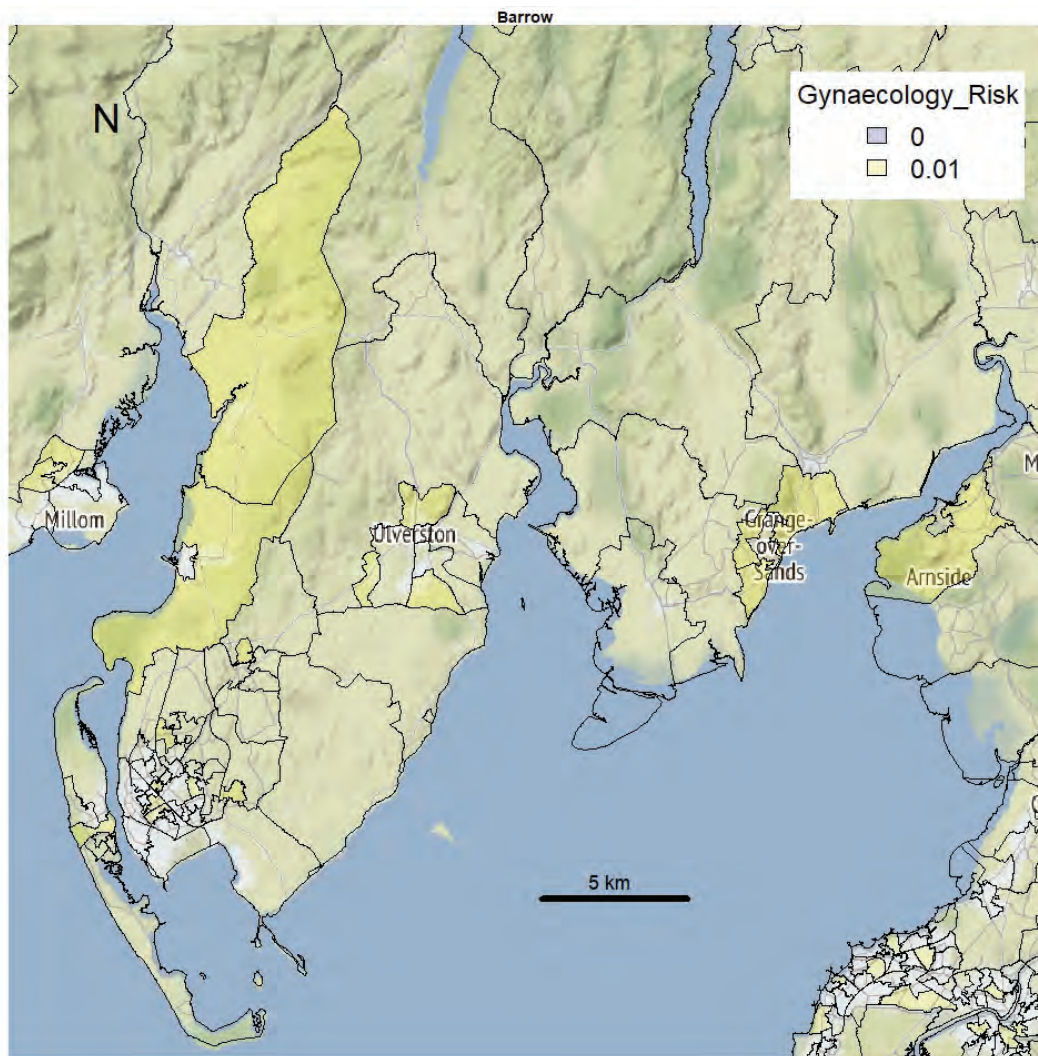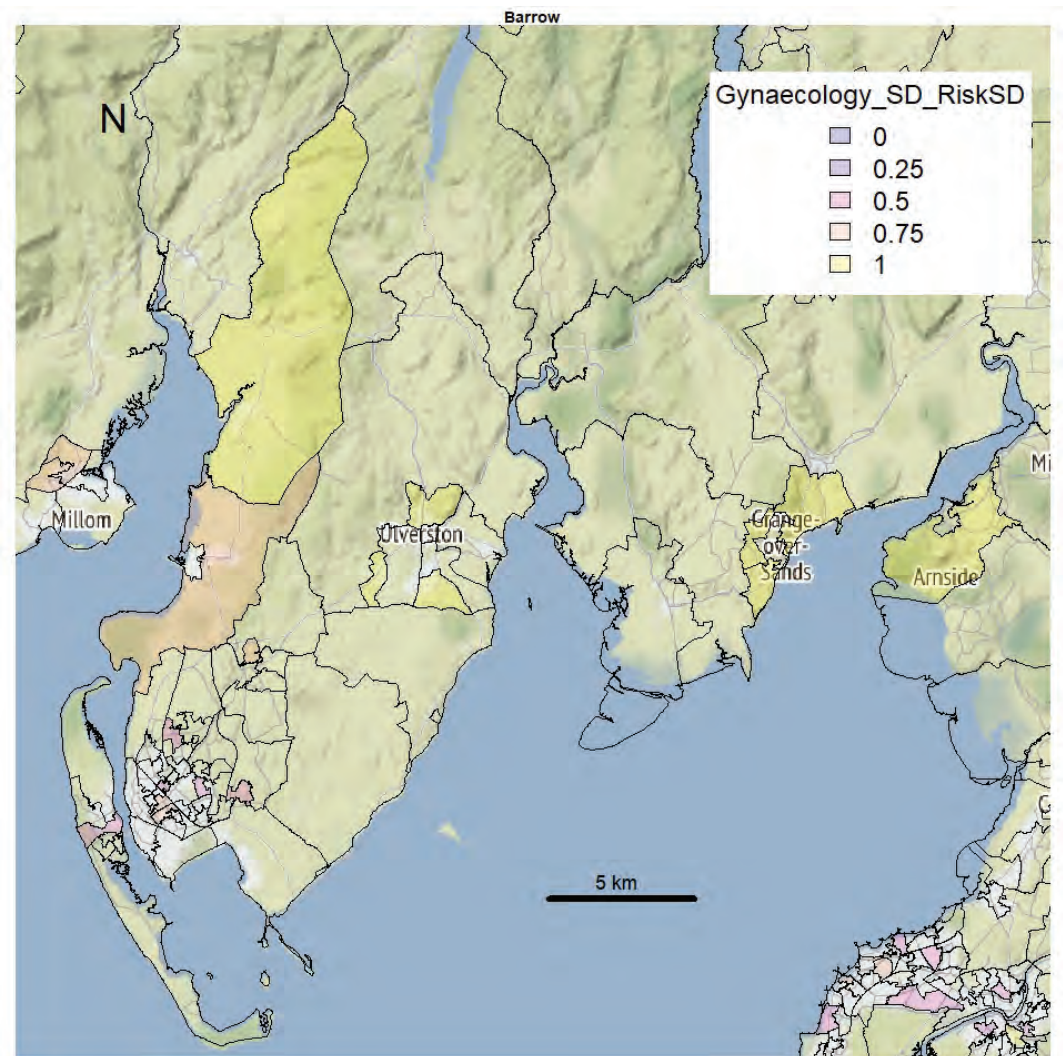

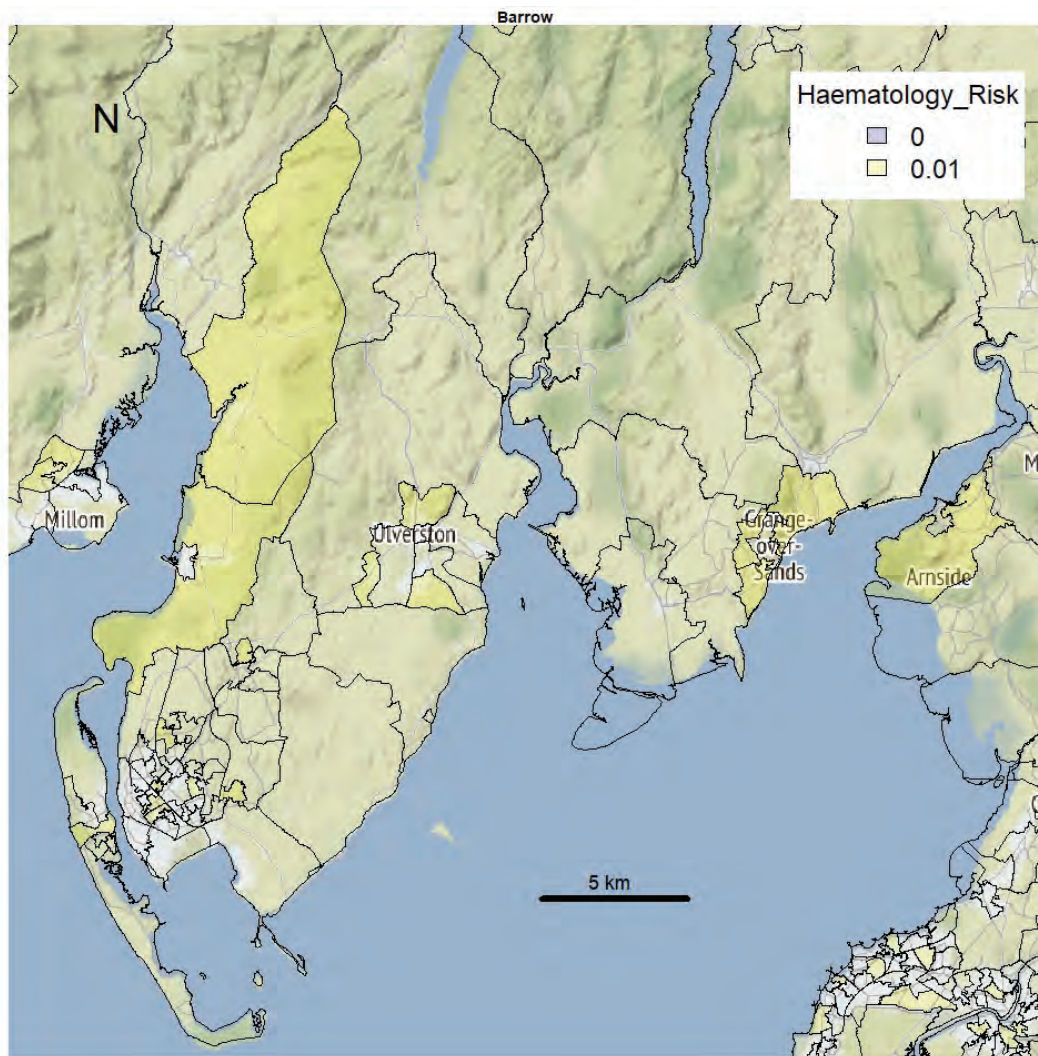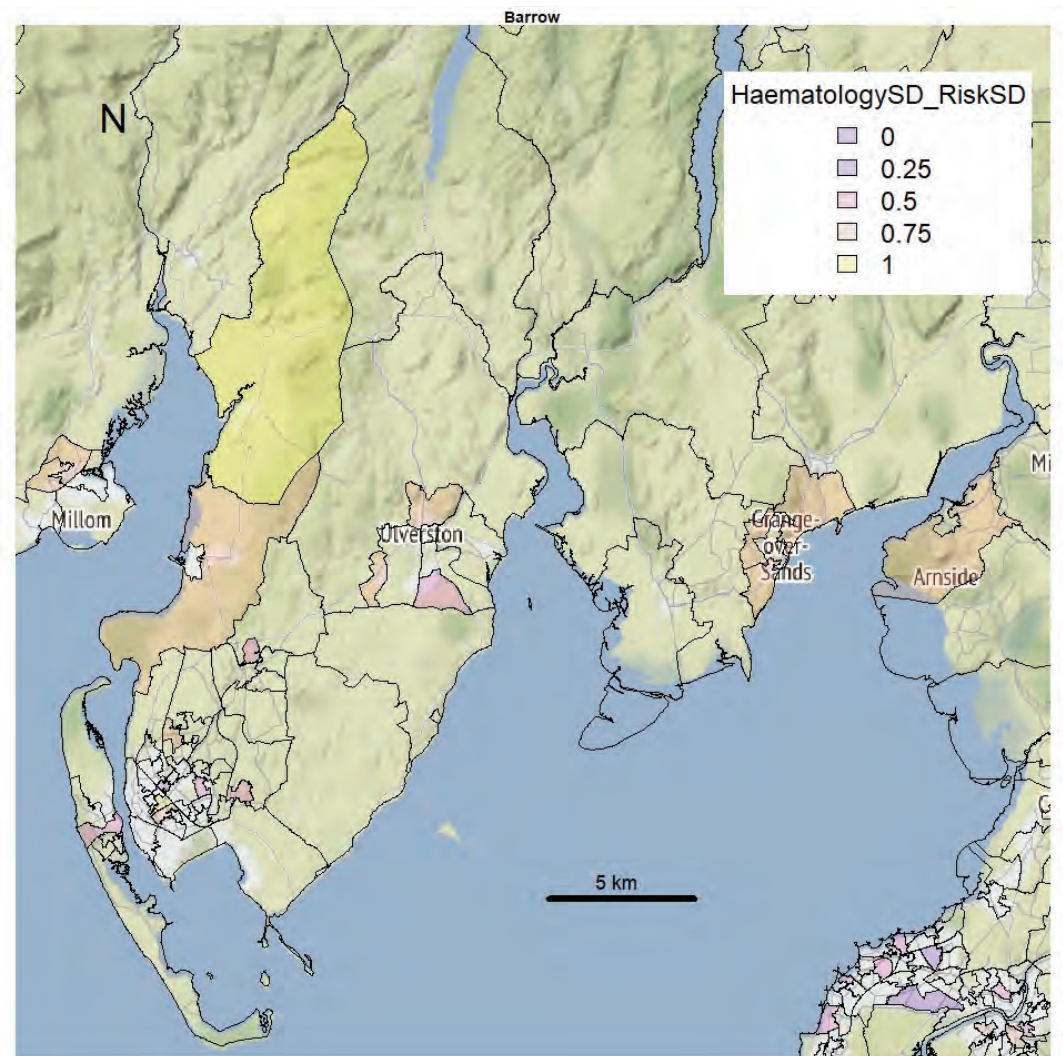



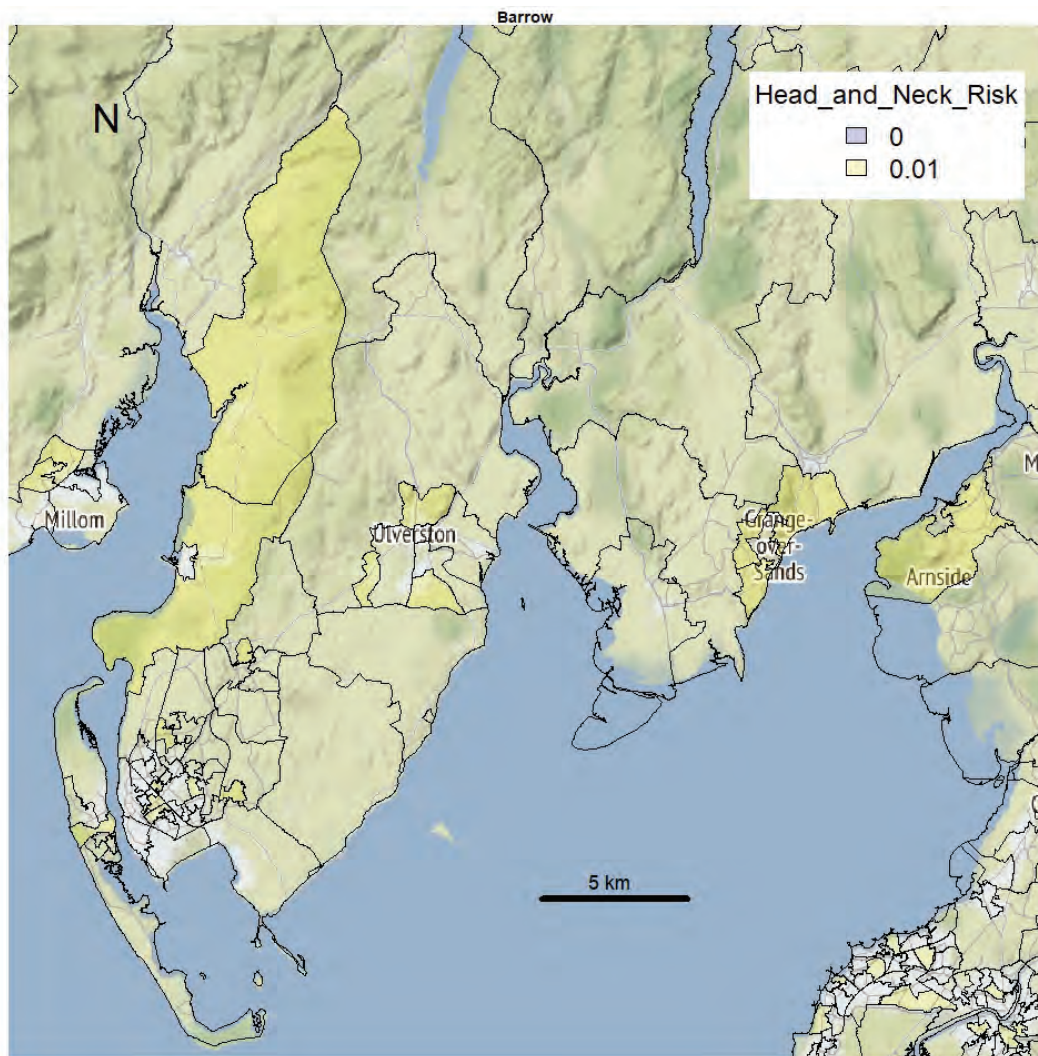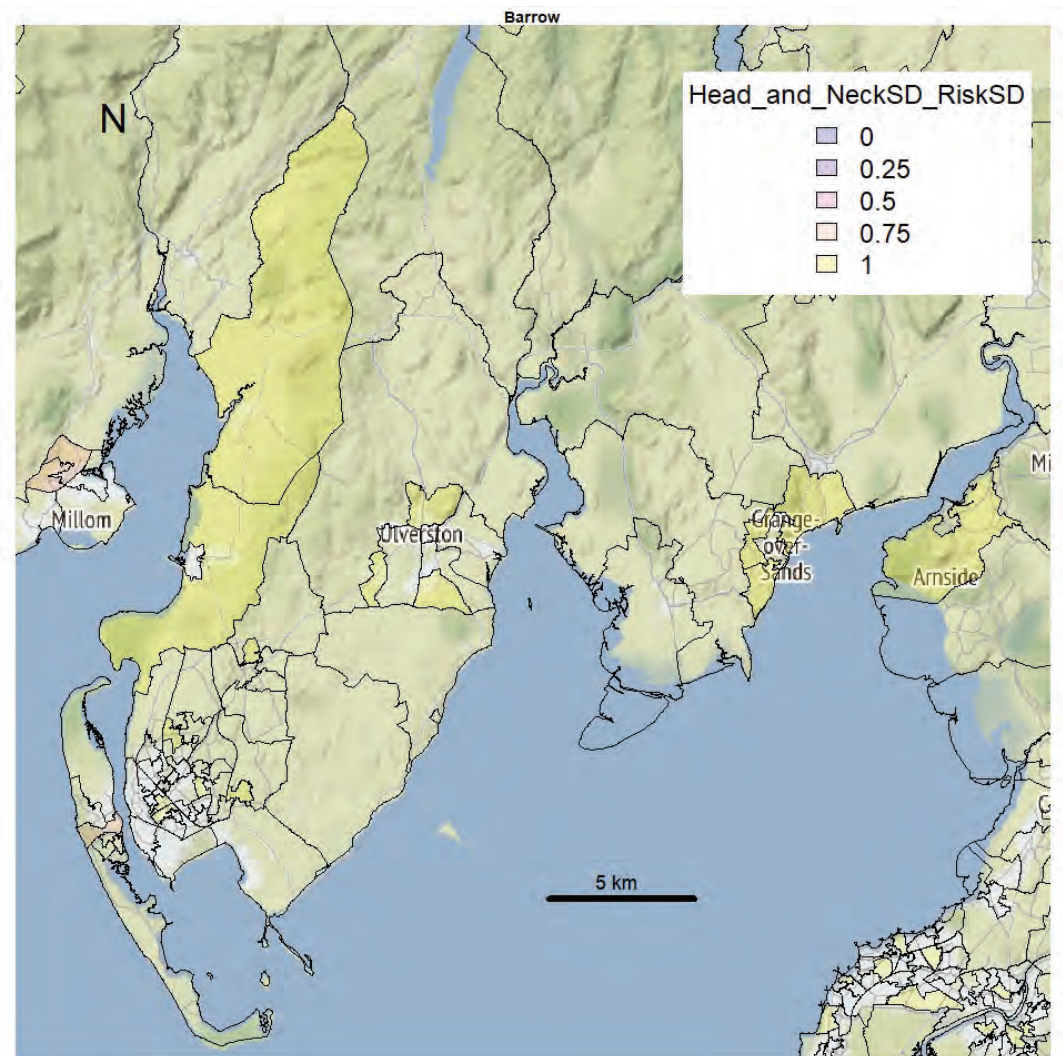

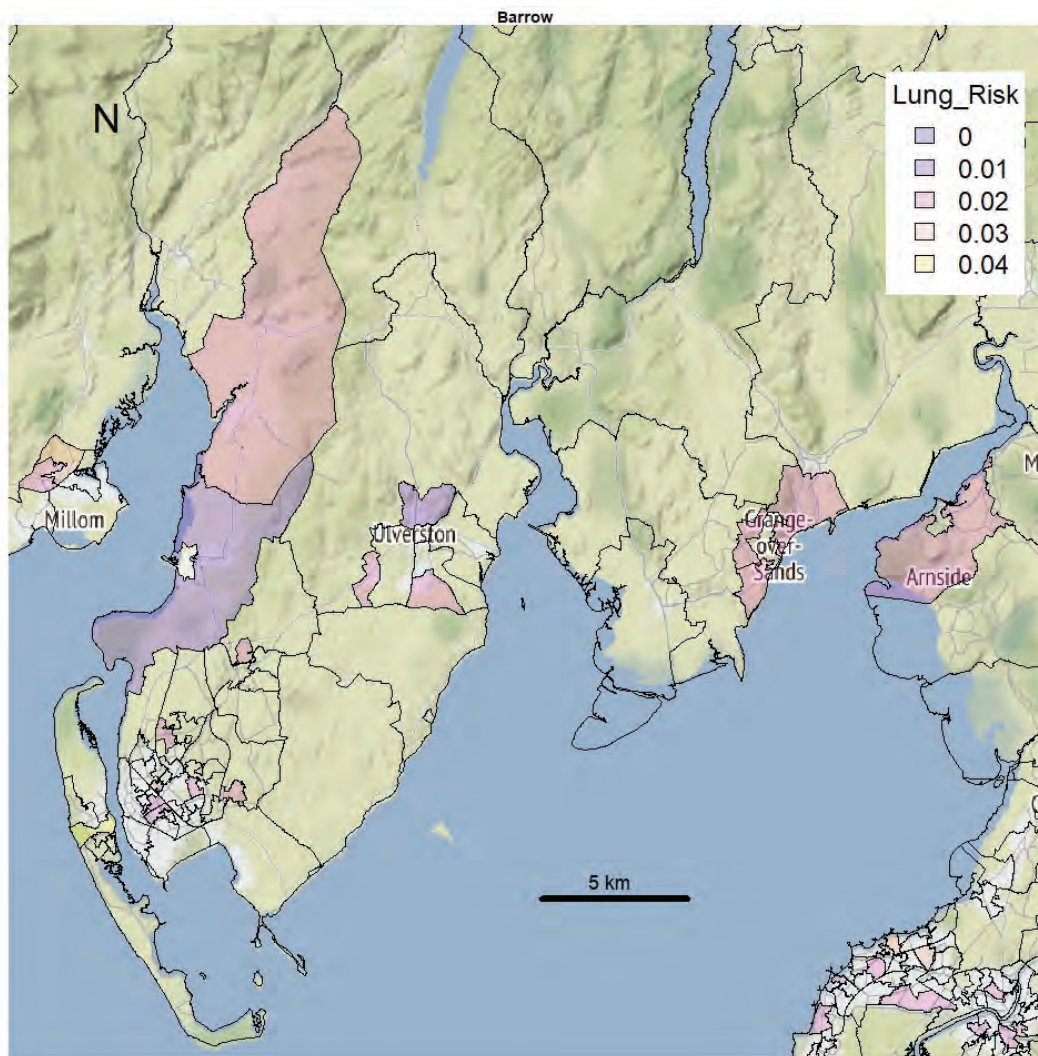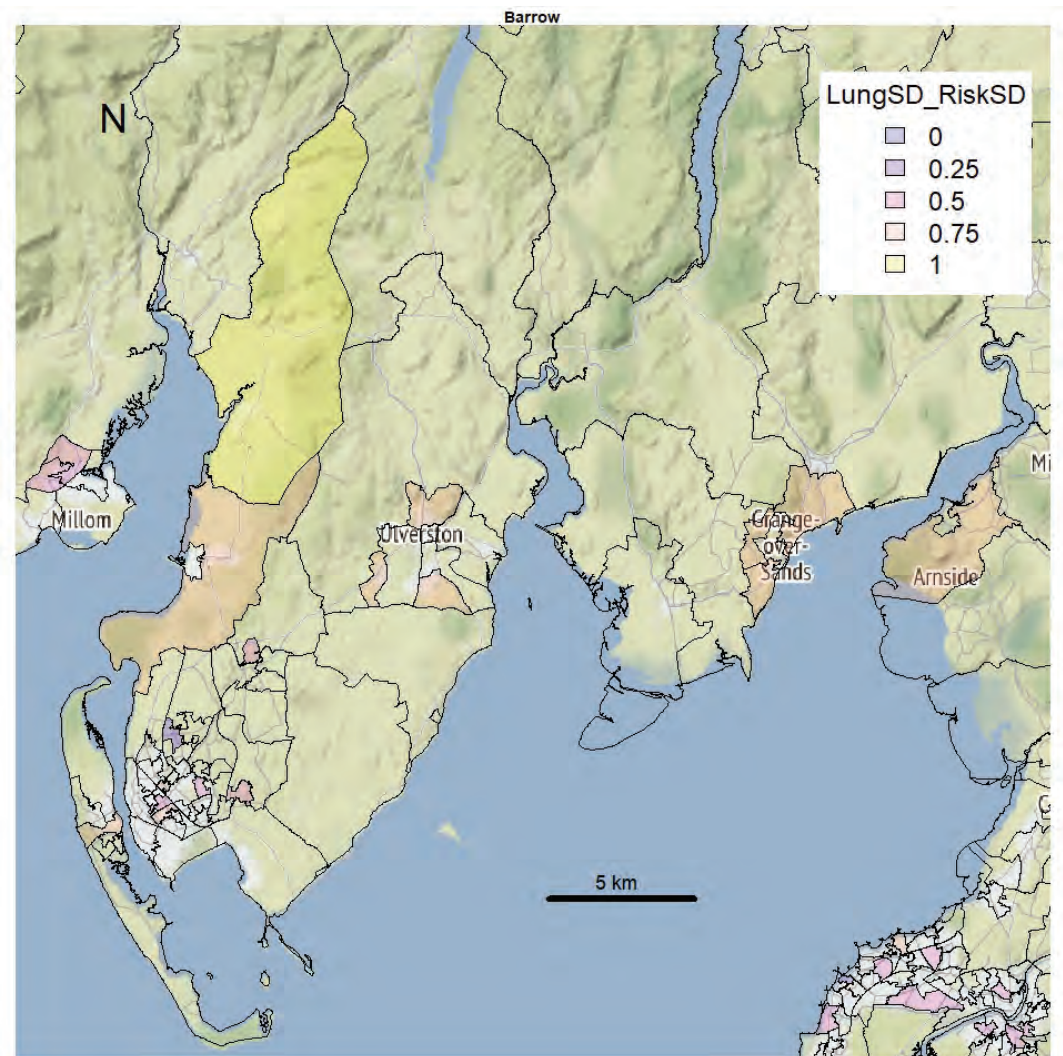

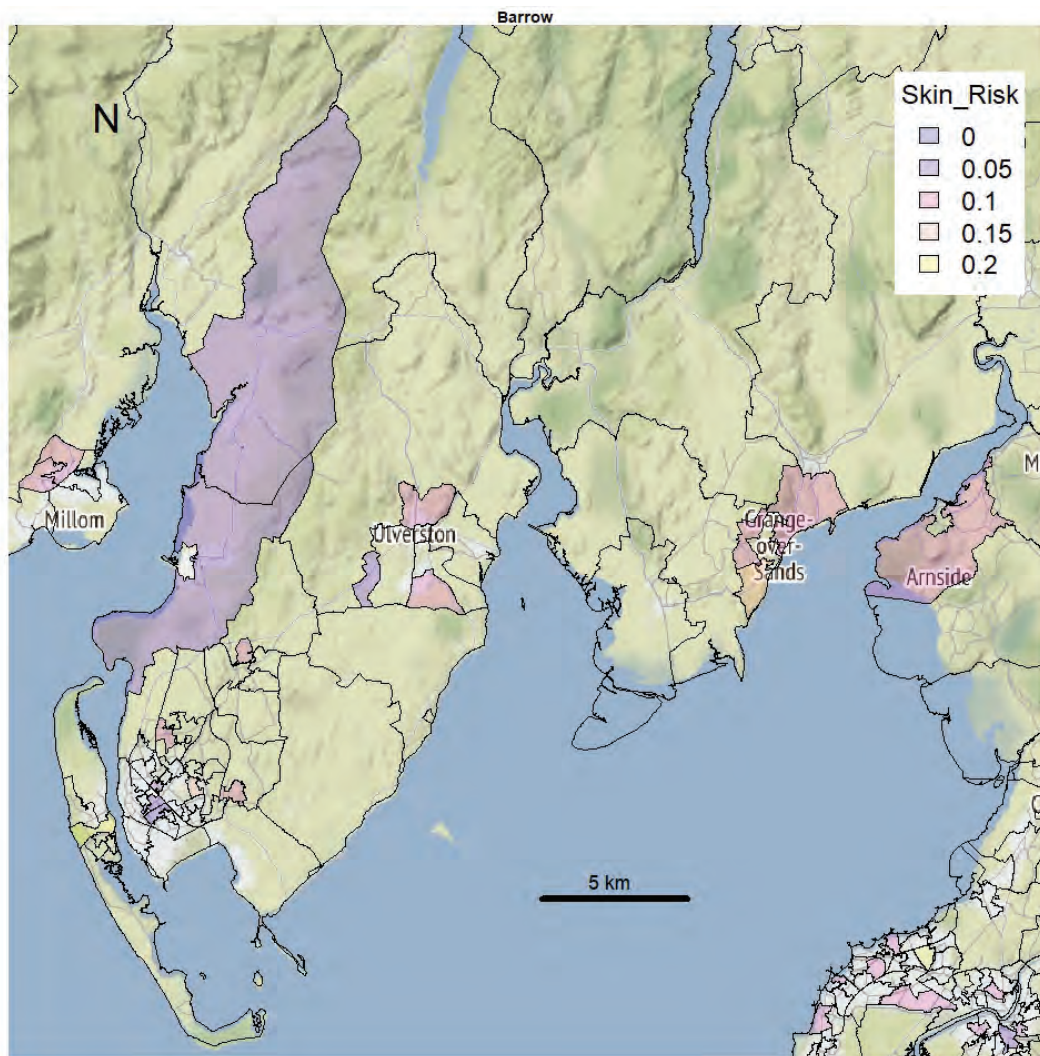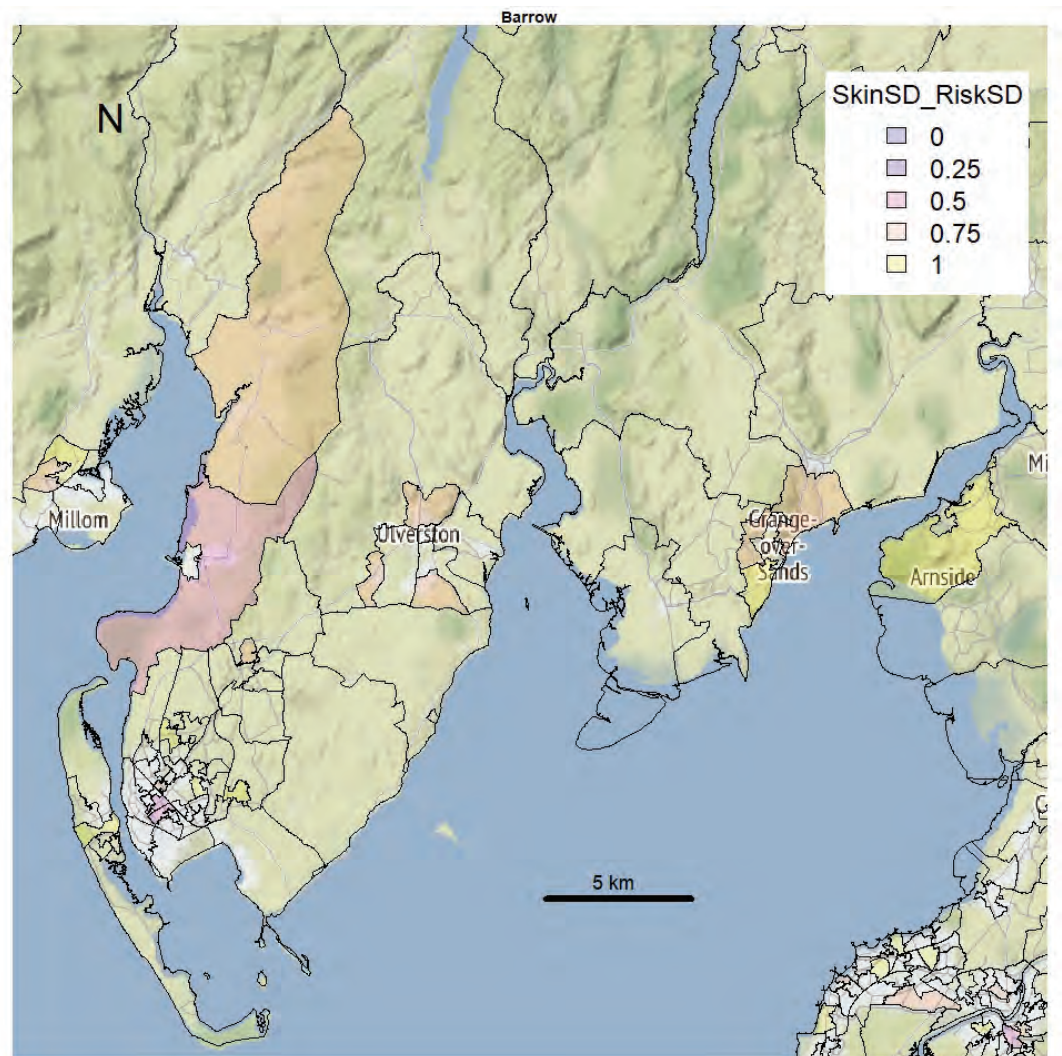

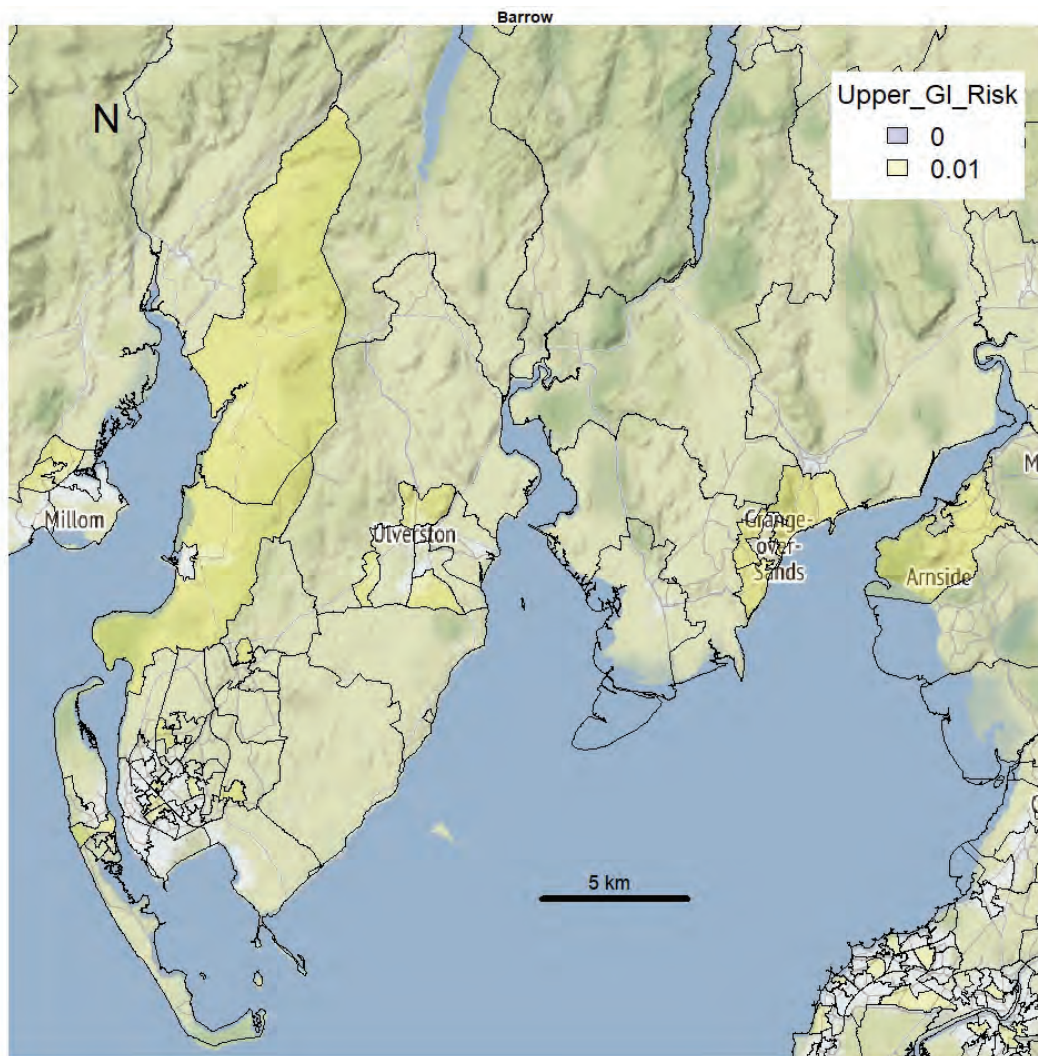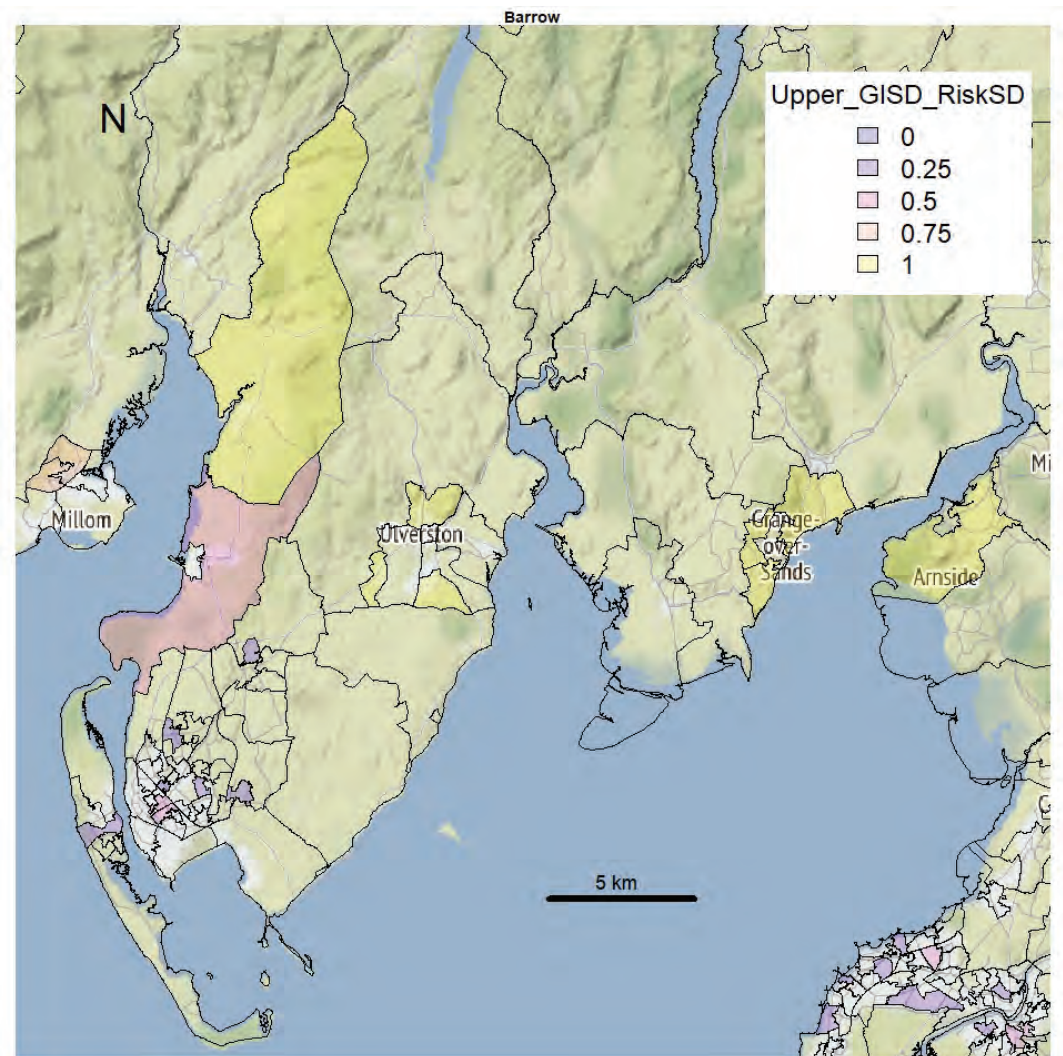

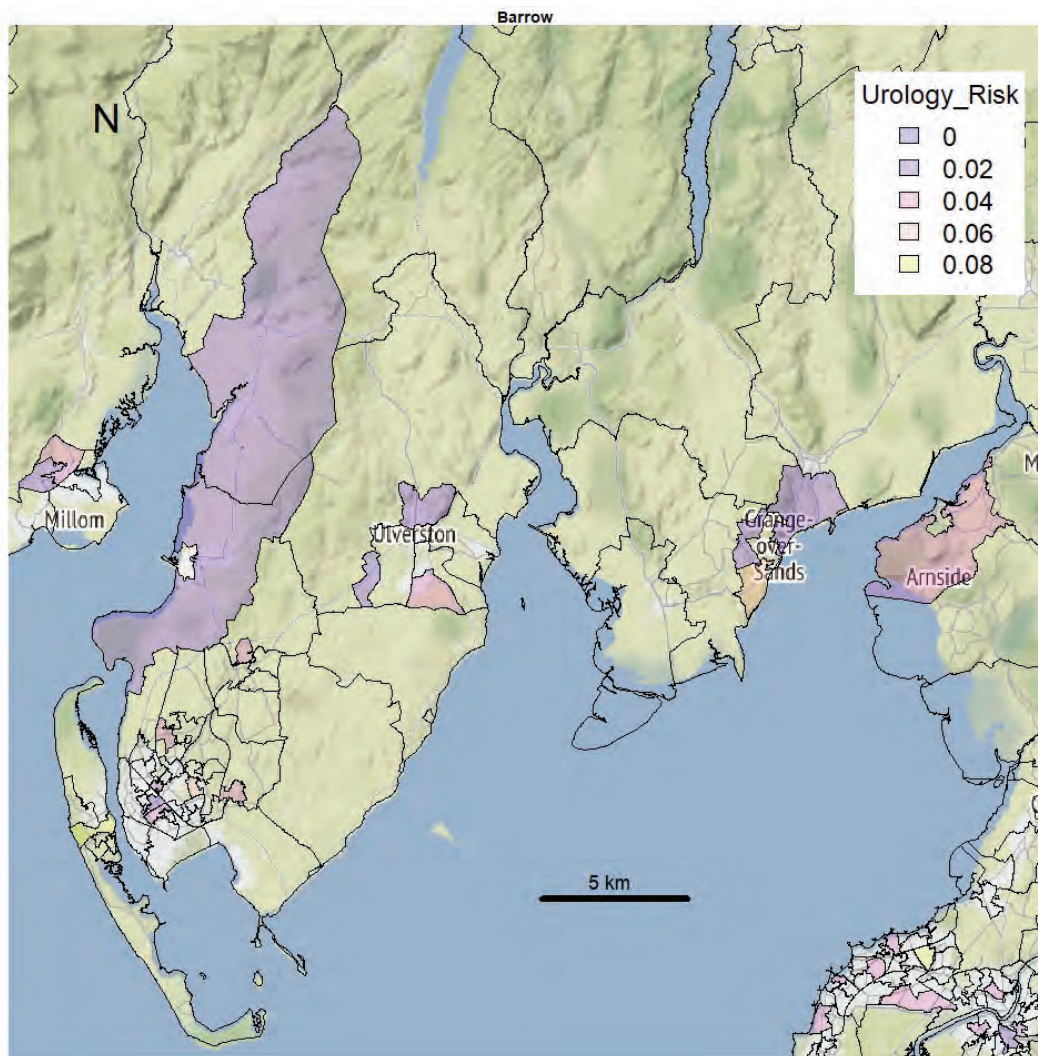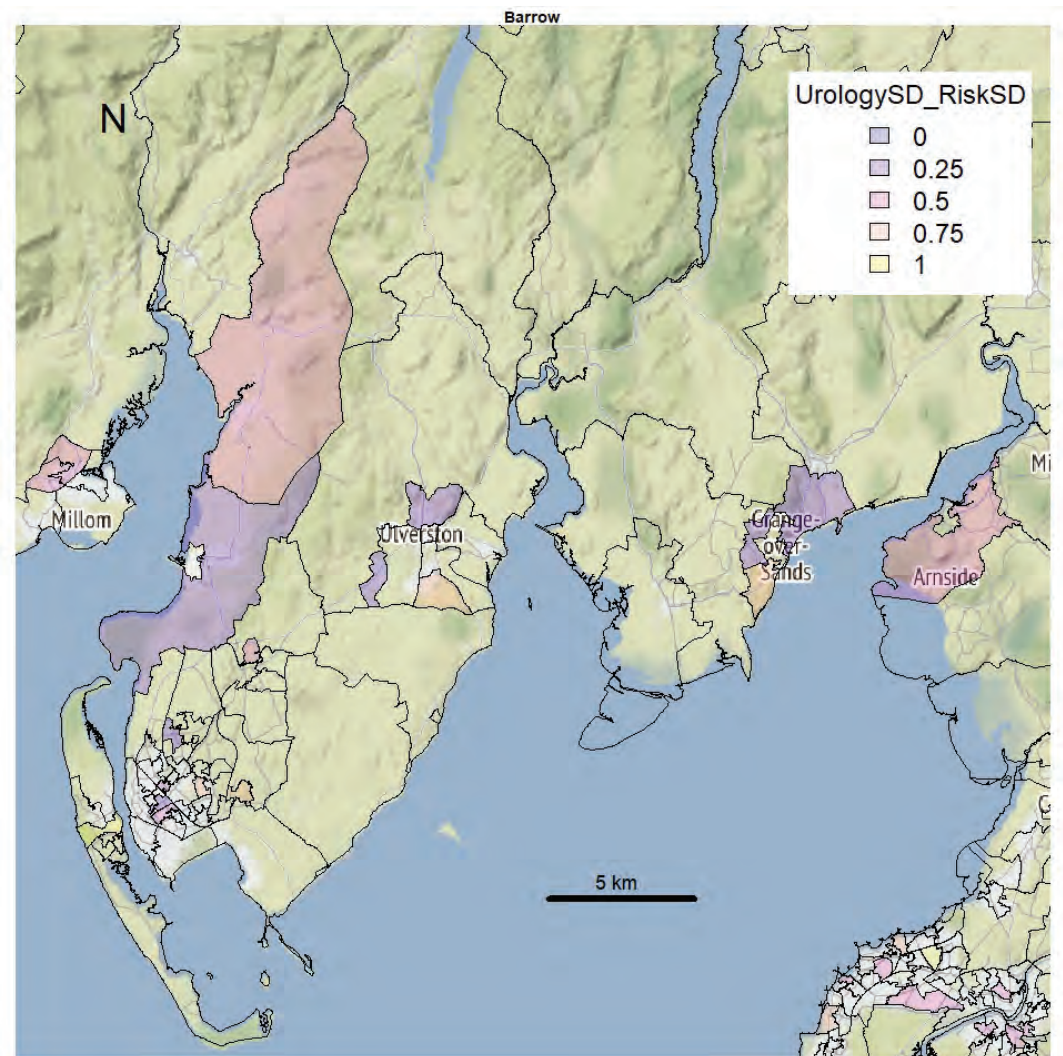

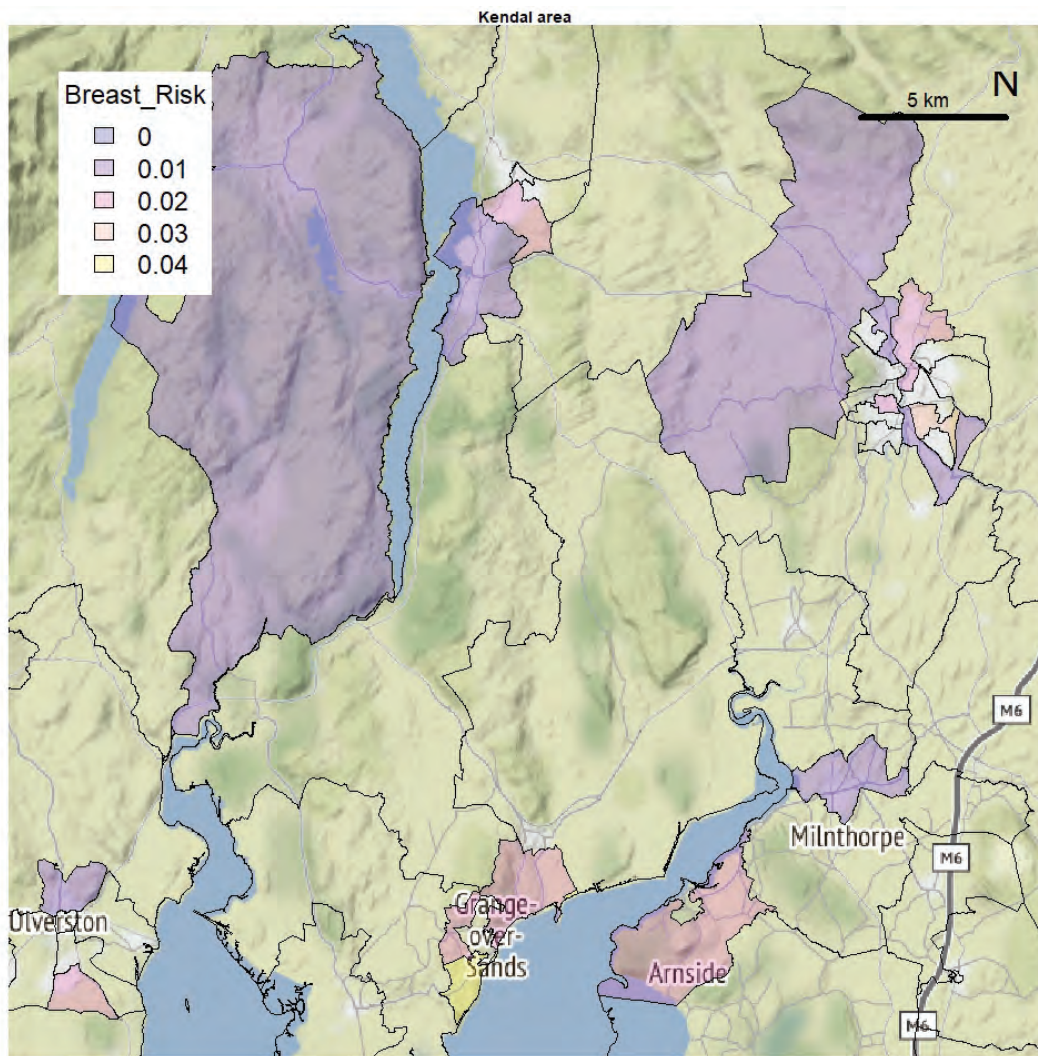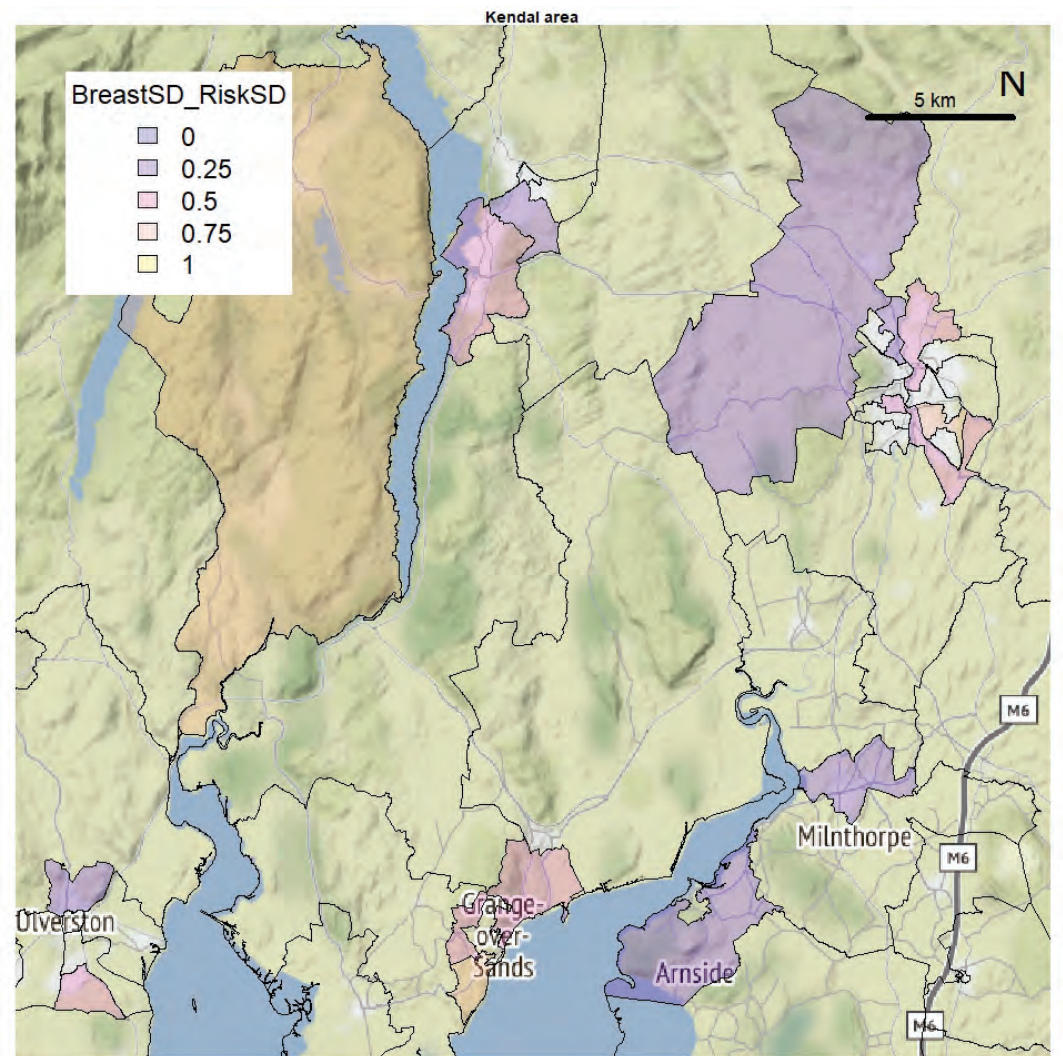

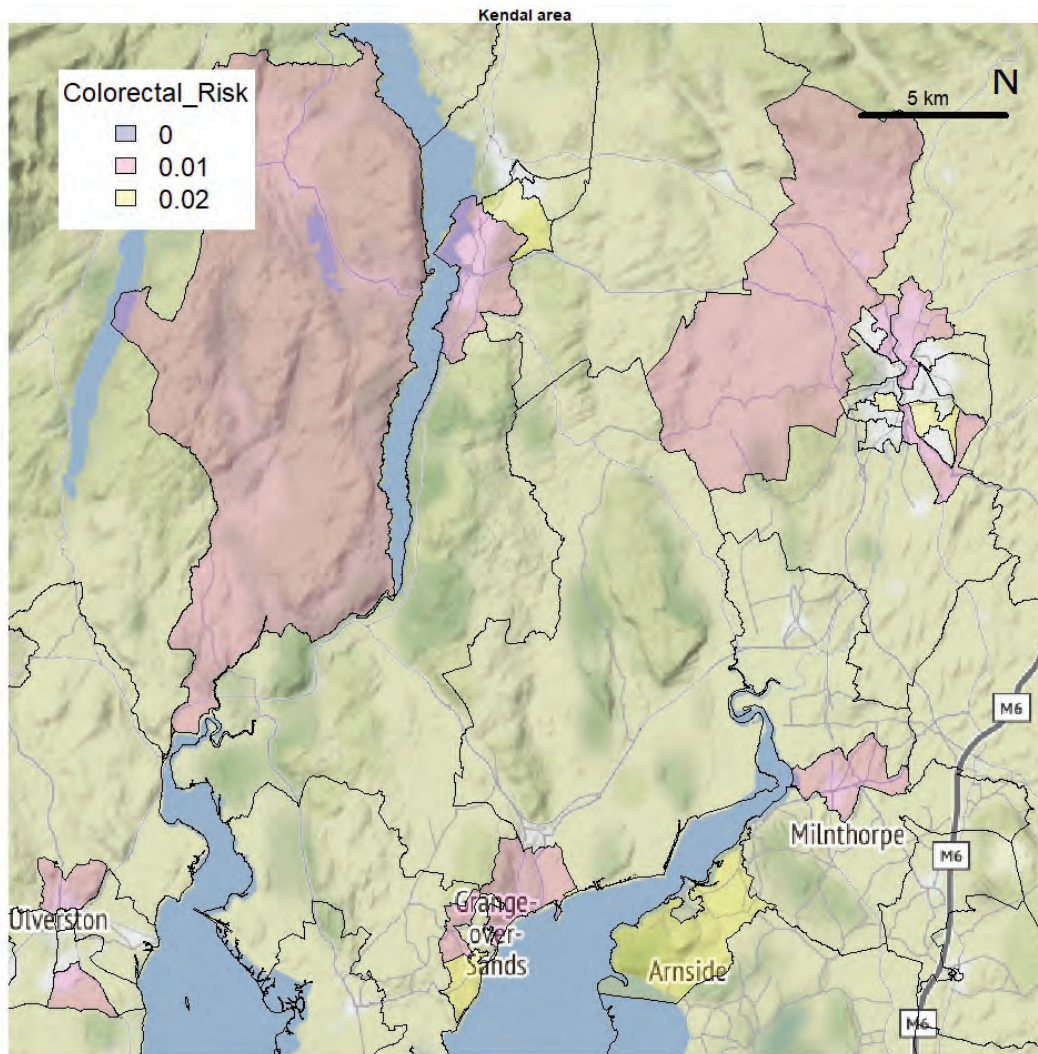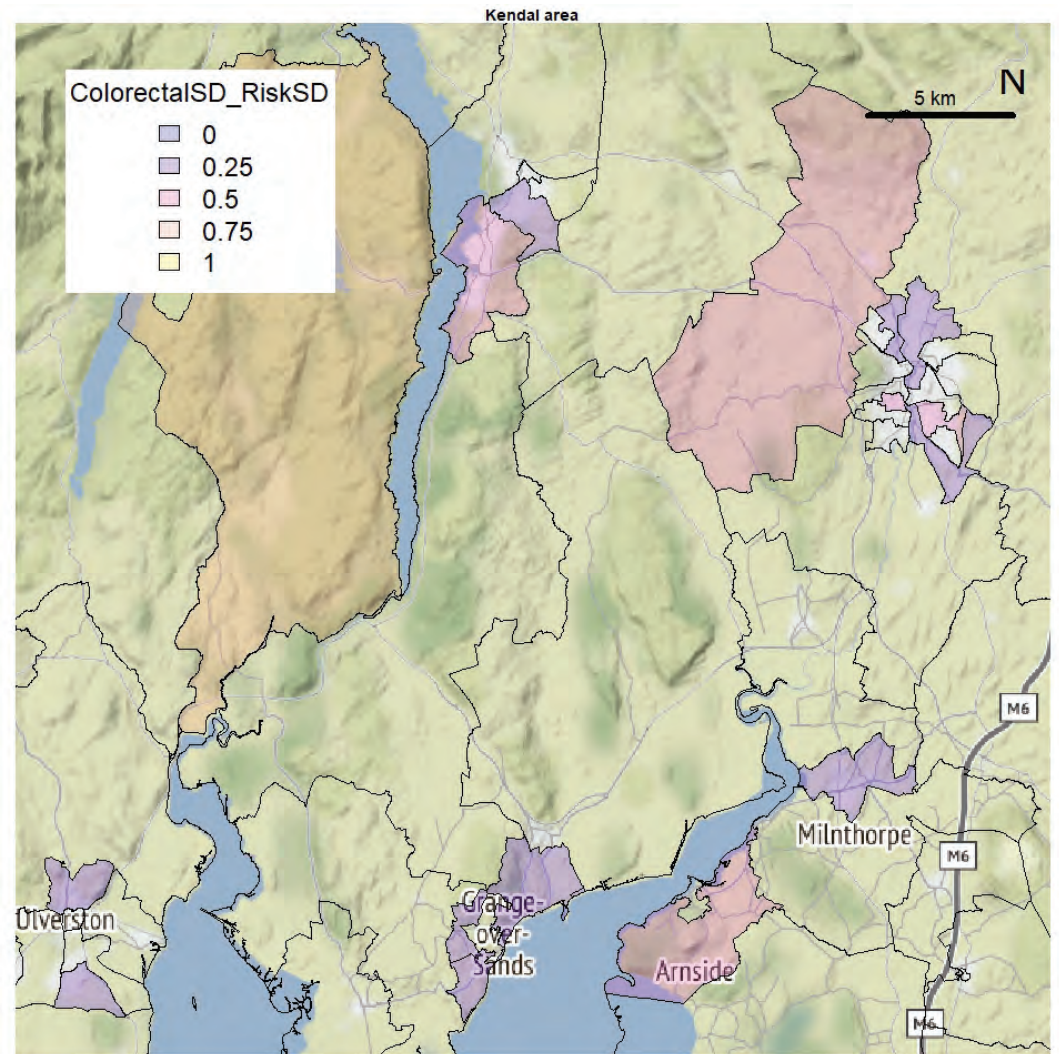

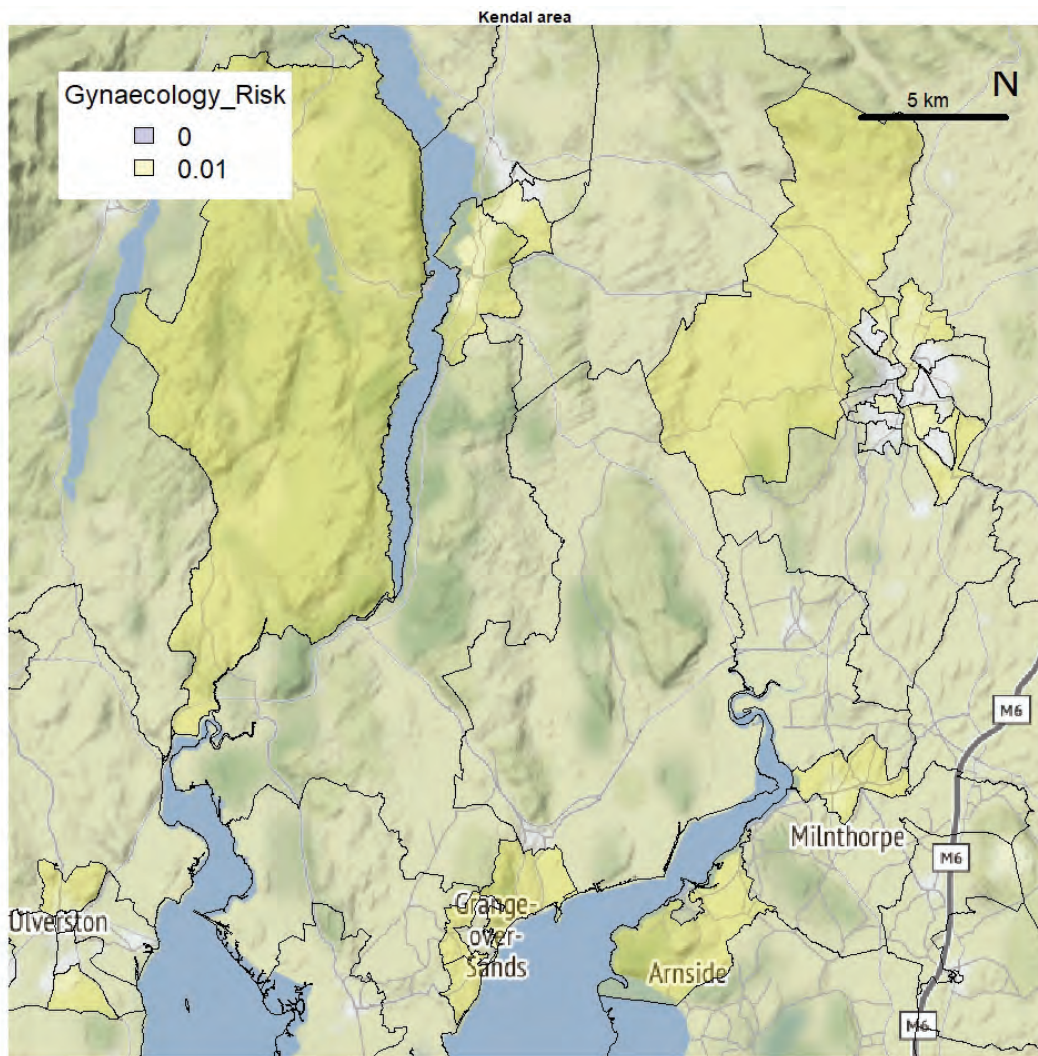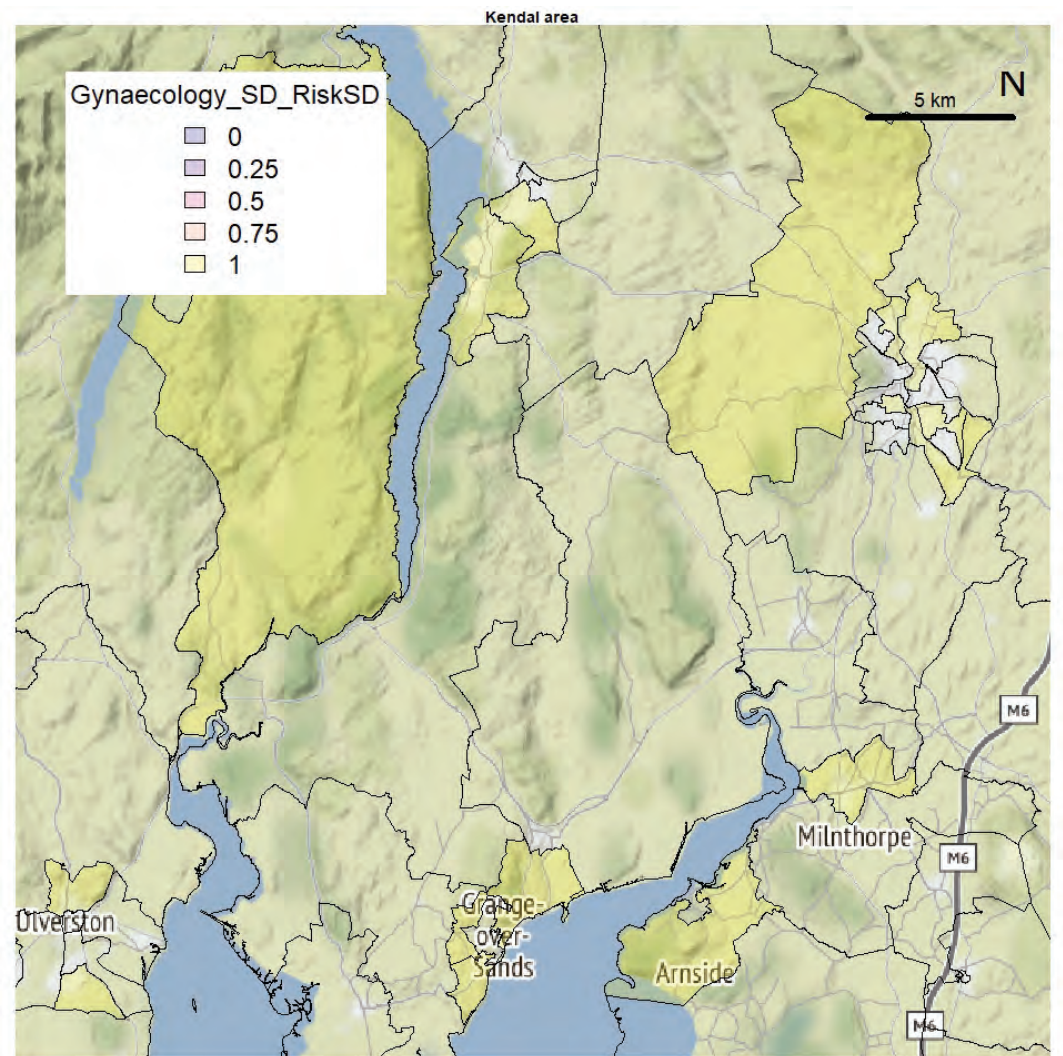



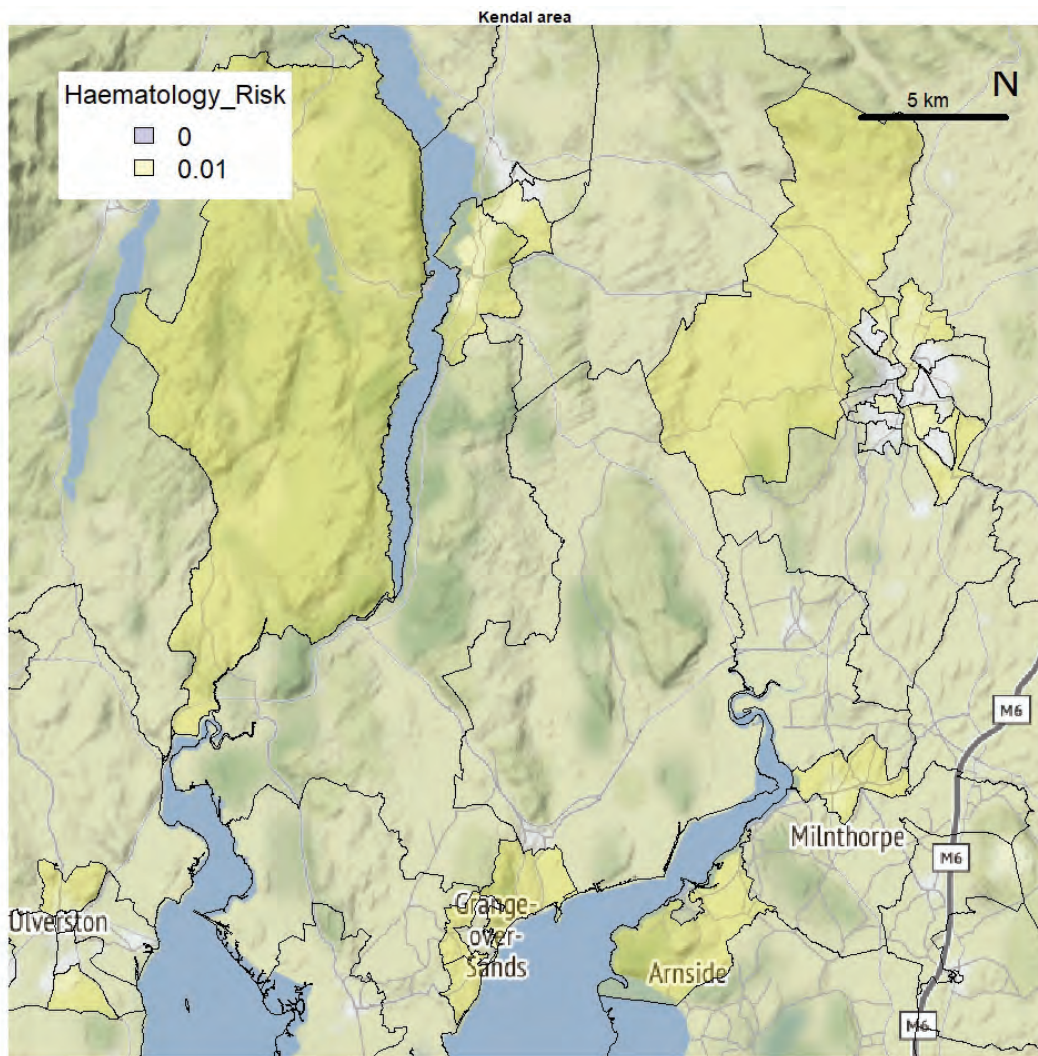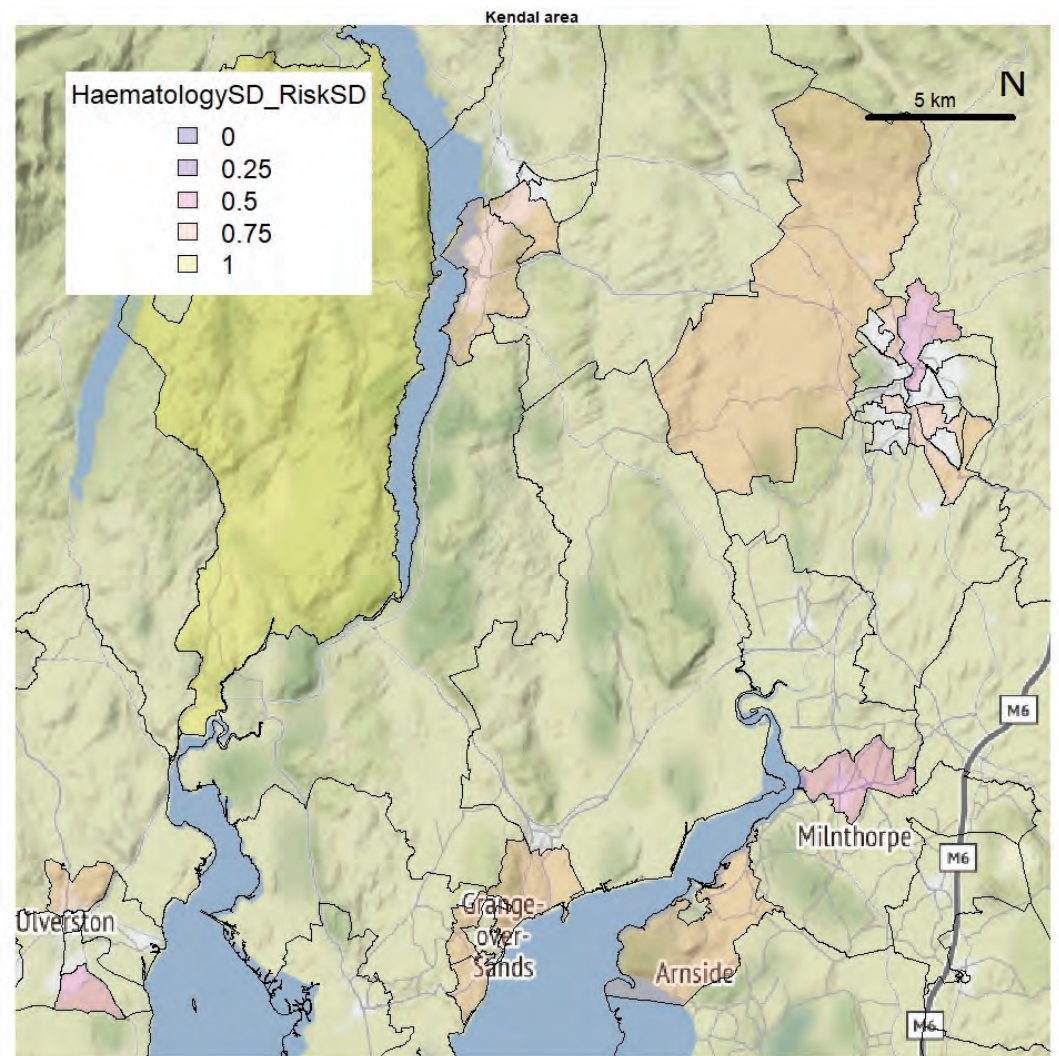

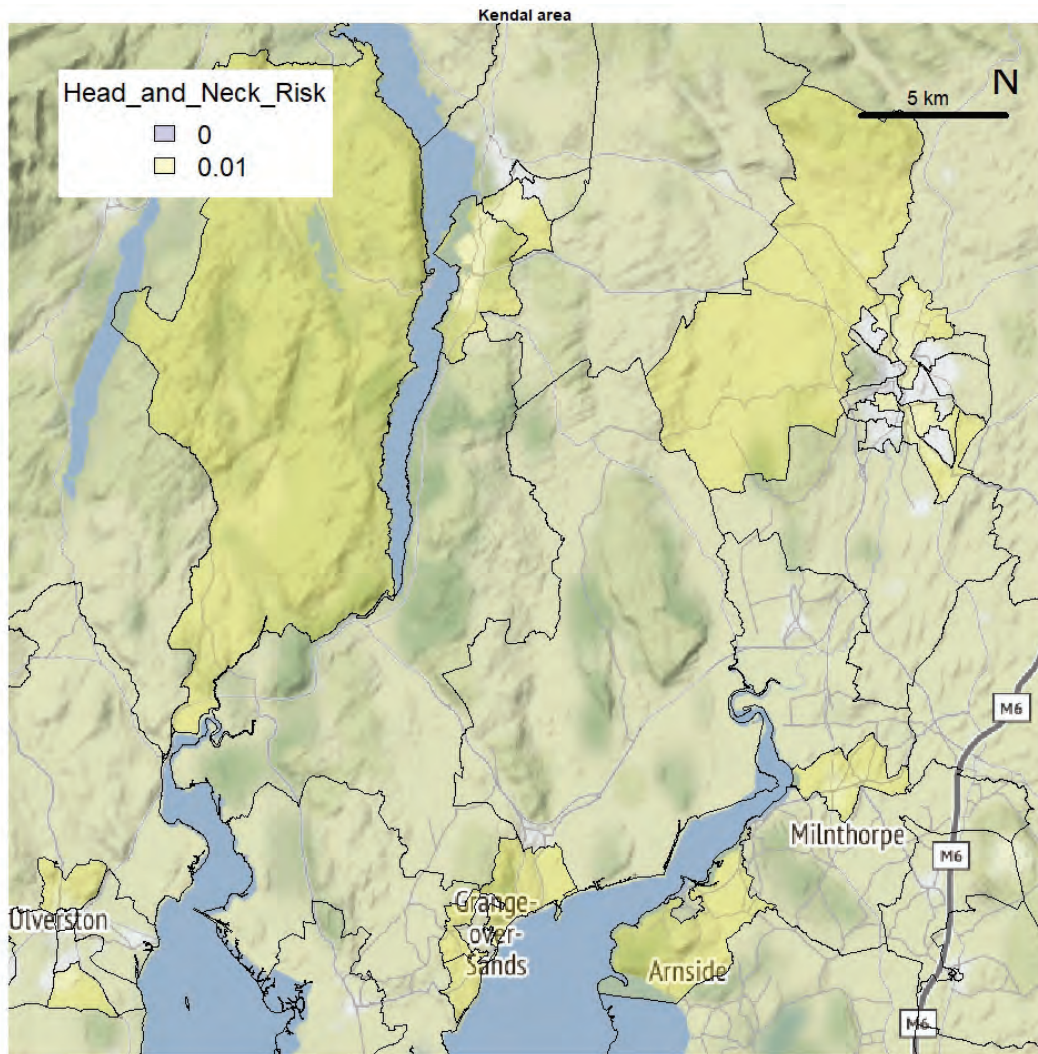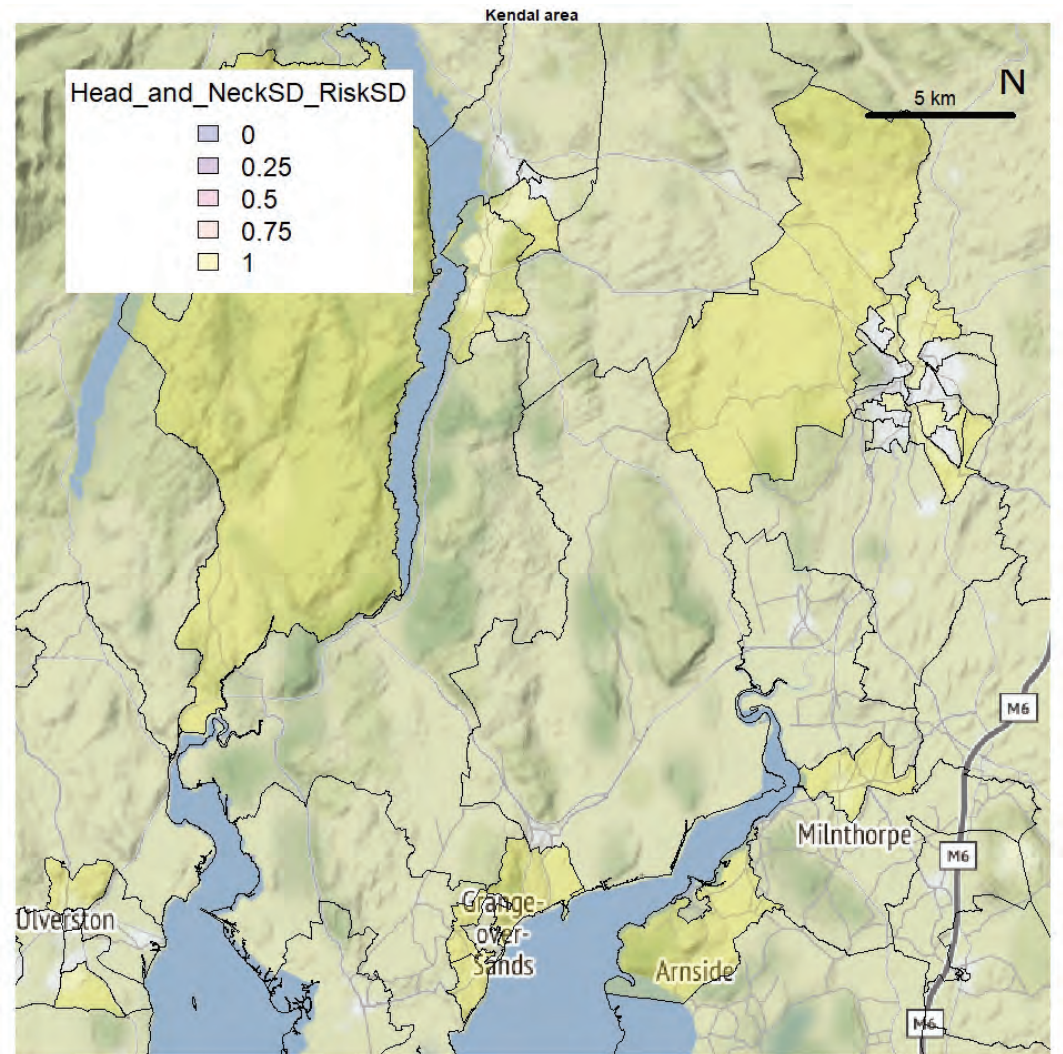

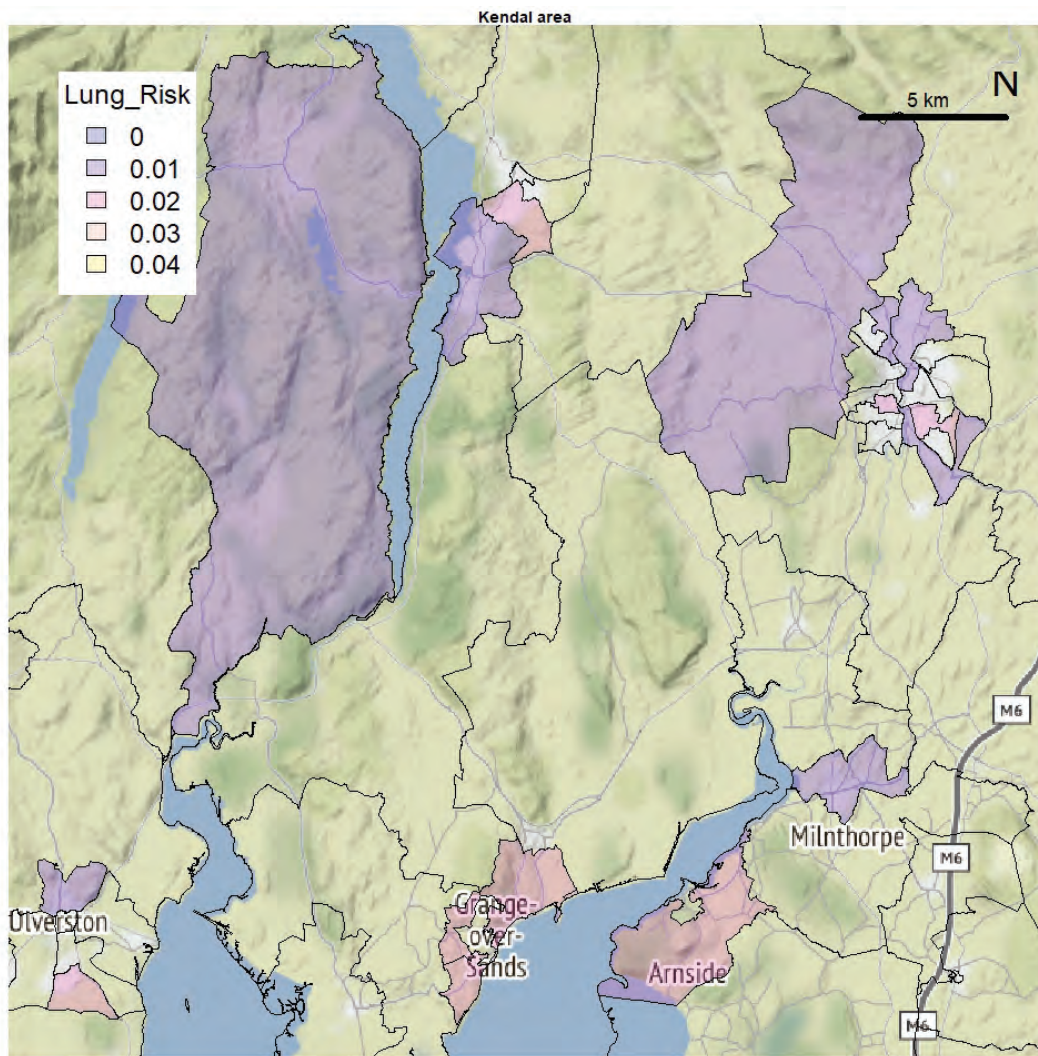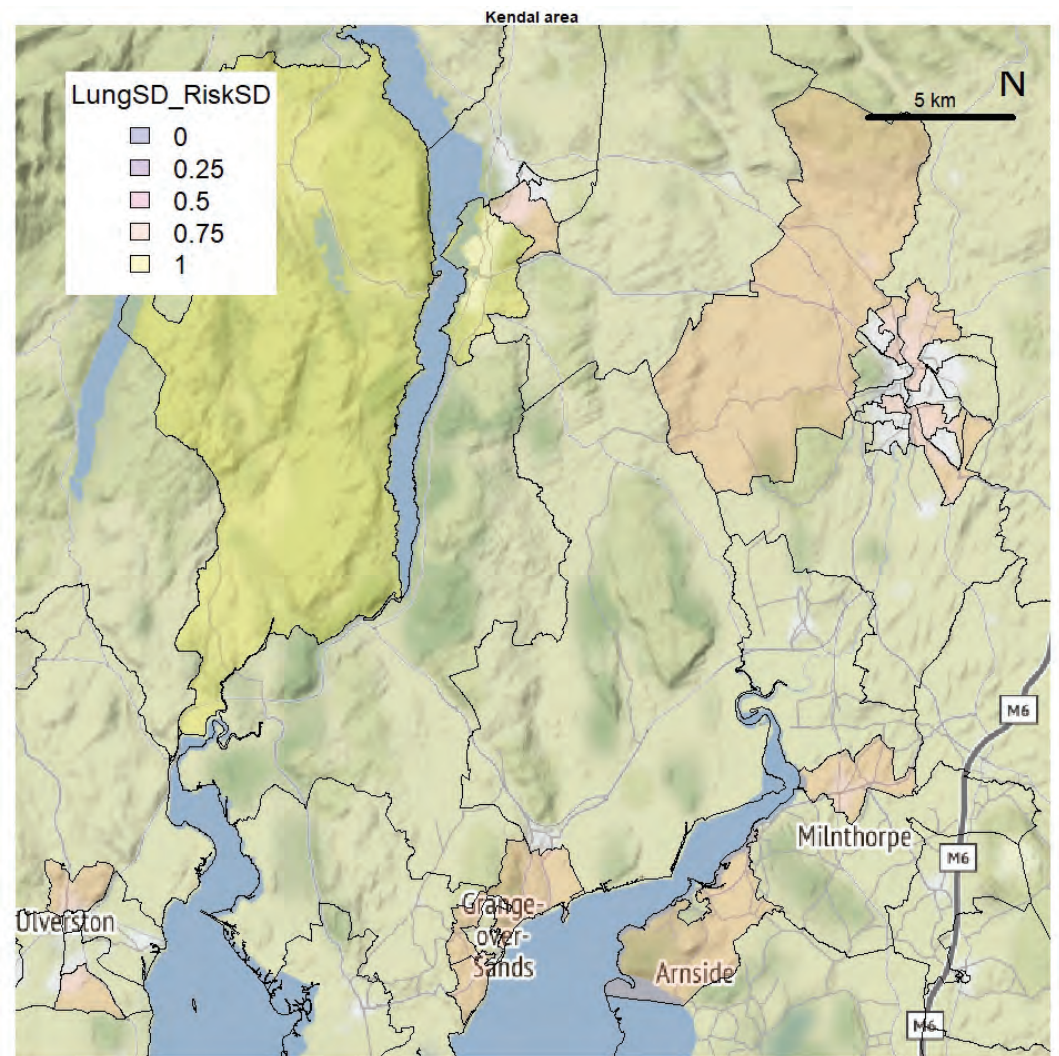

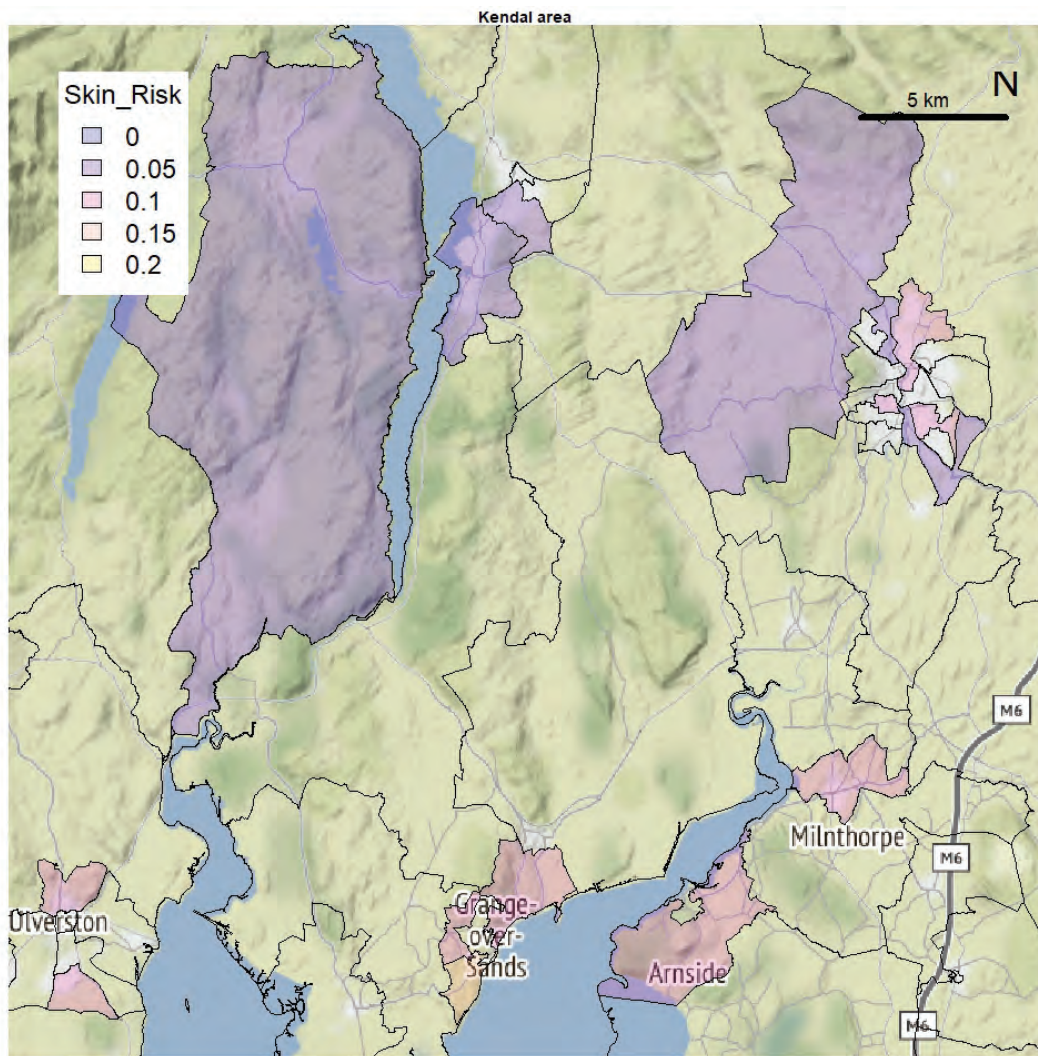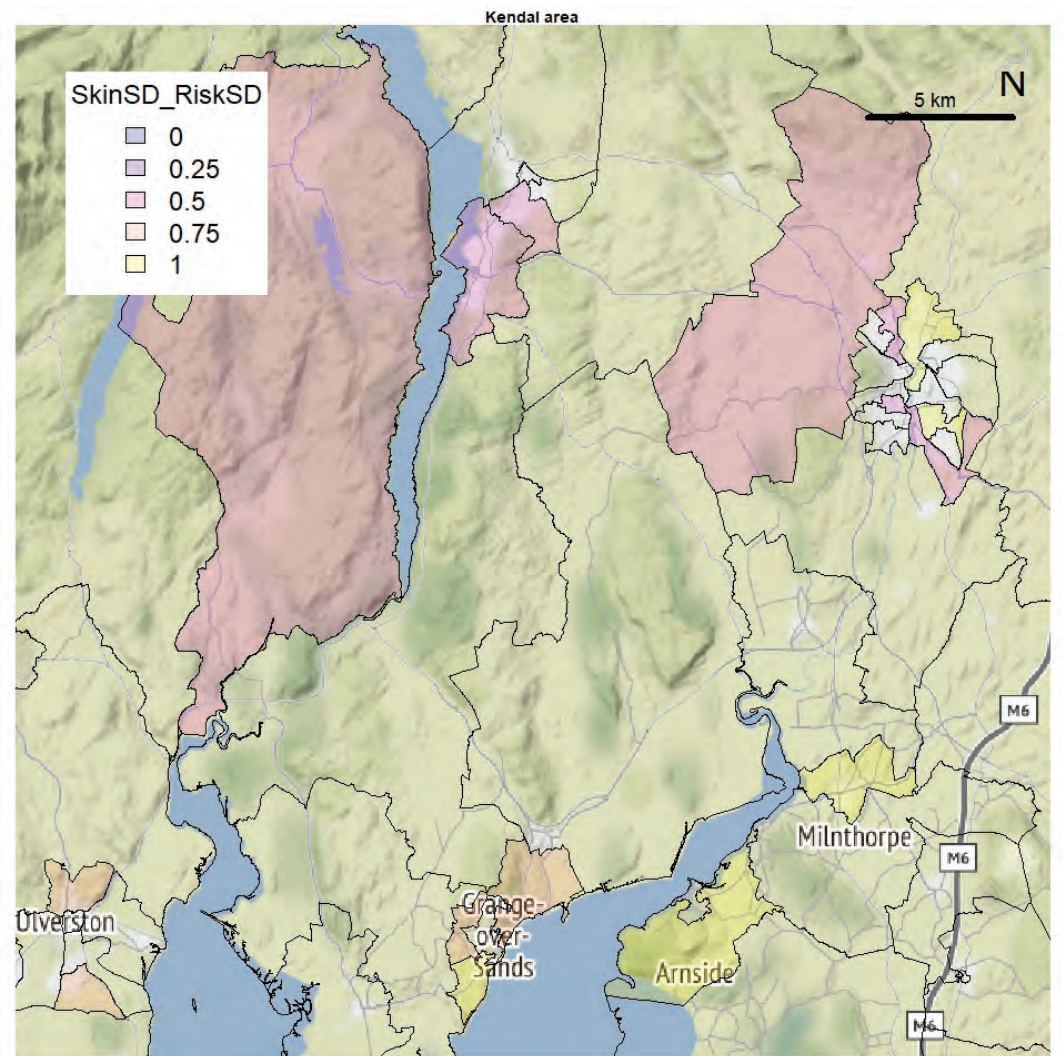

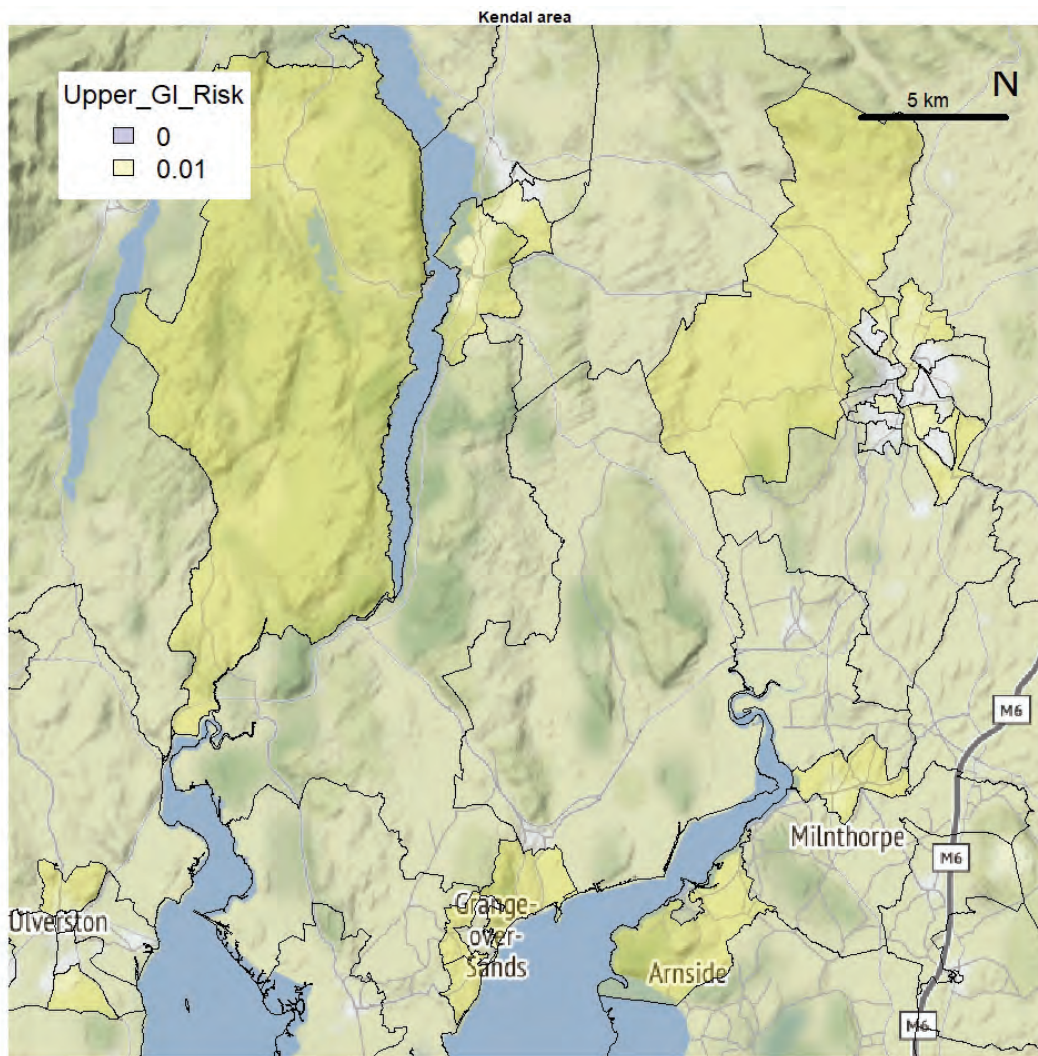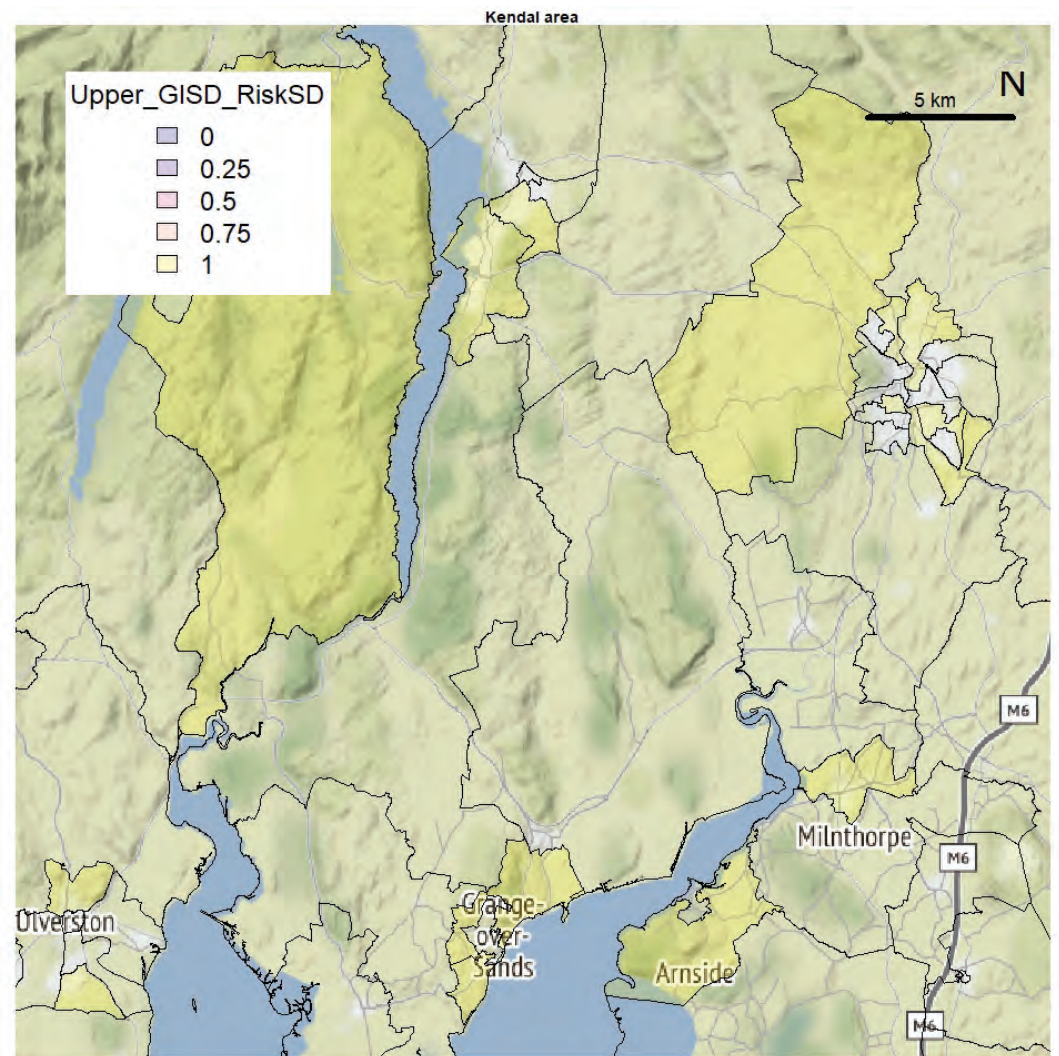

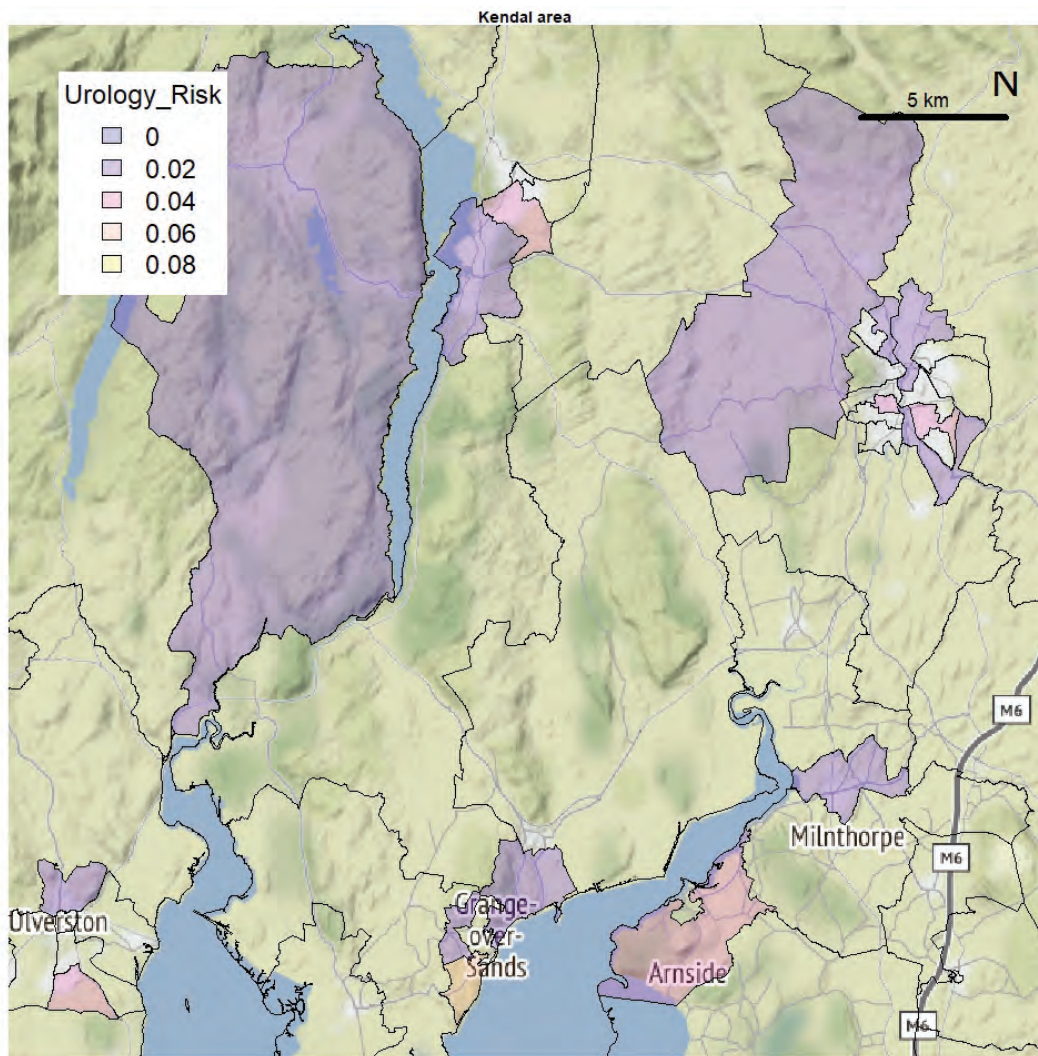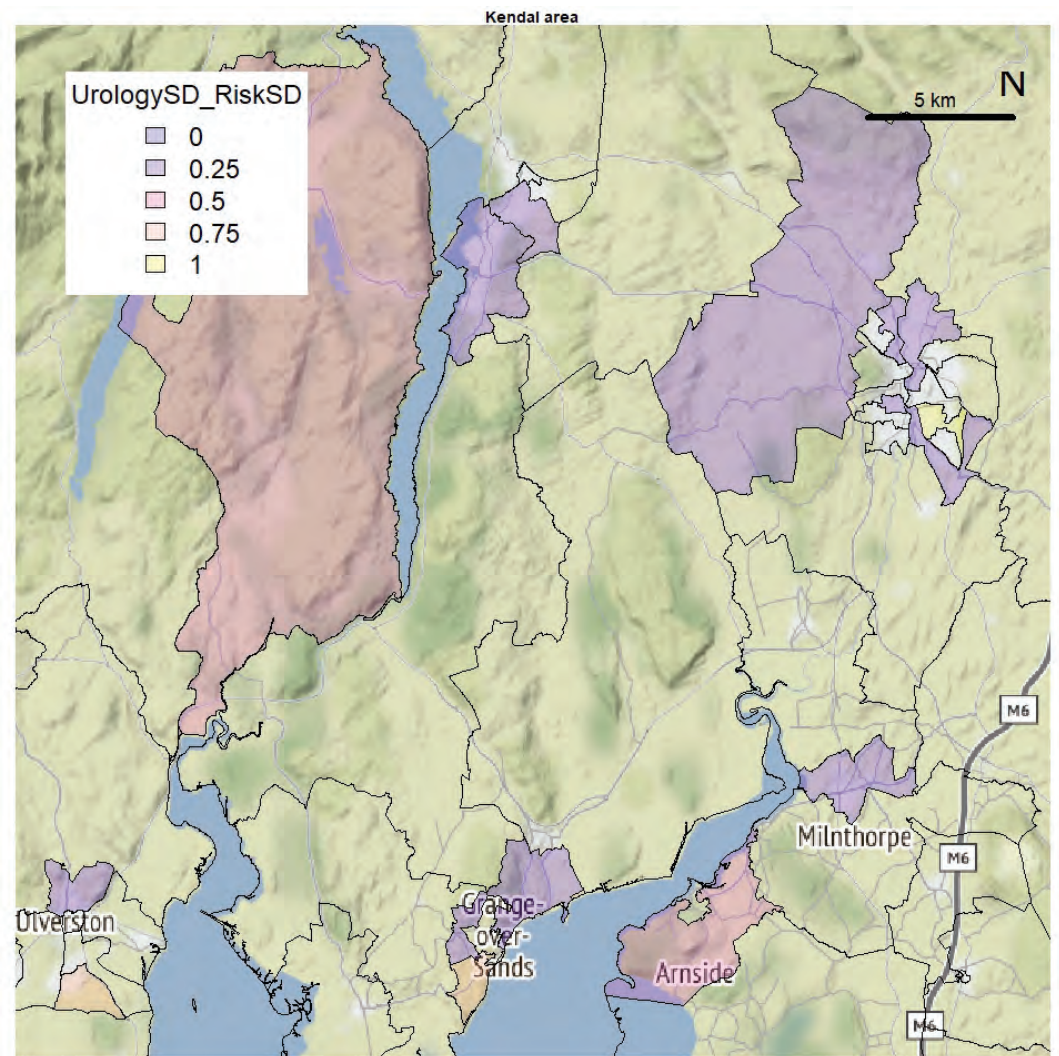

Supplementary Information S10: Cancer type risk mapping by age groups (under 50 and 50 years old and over).

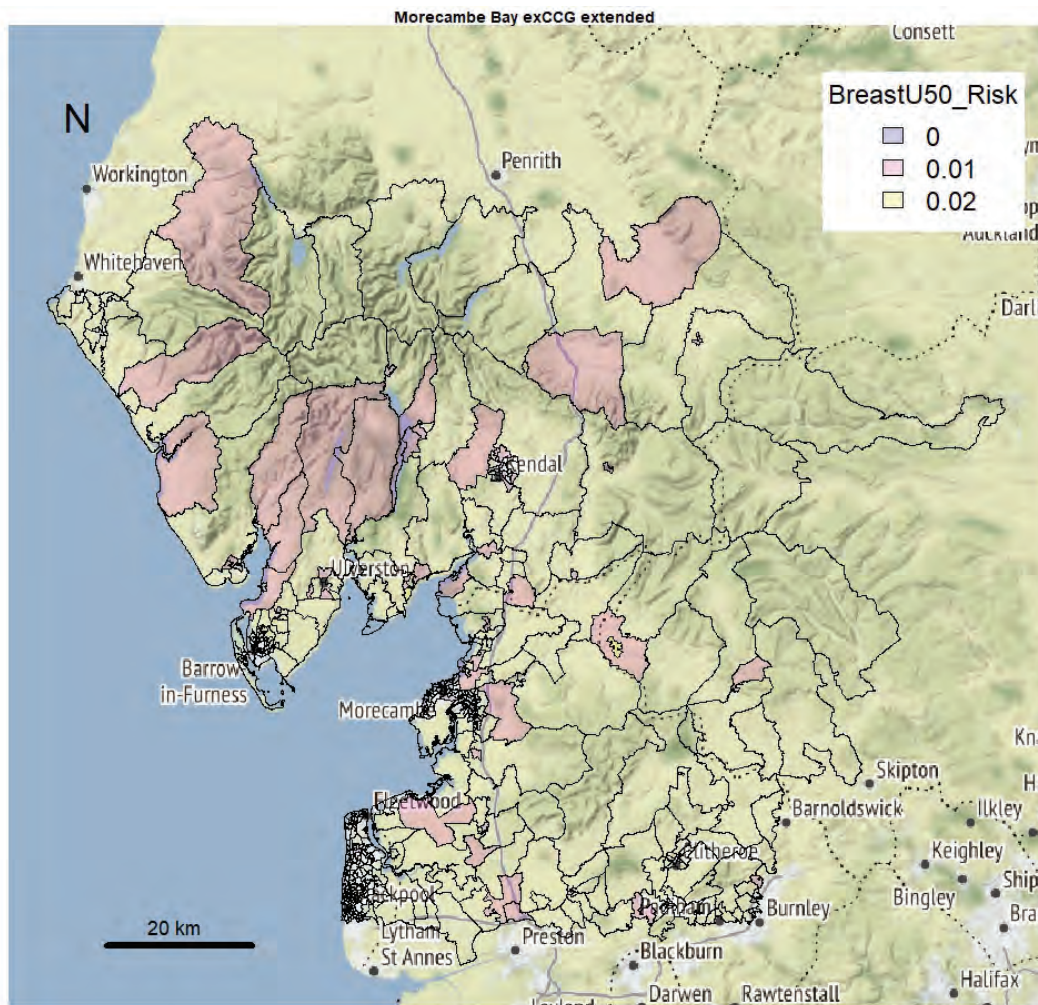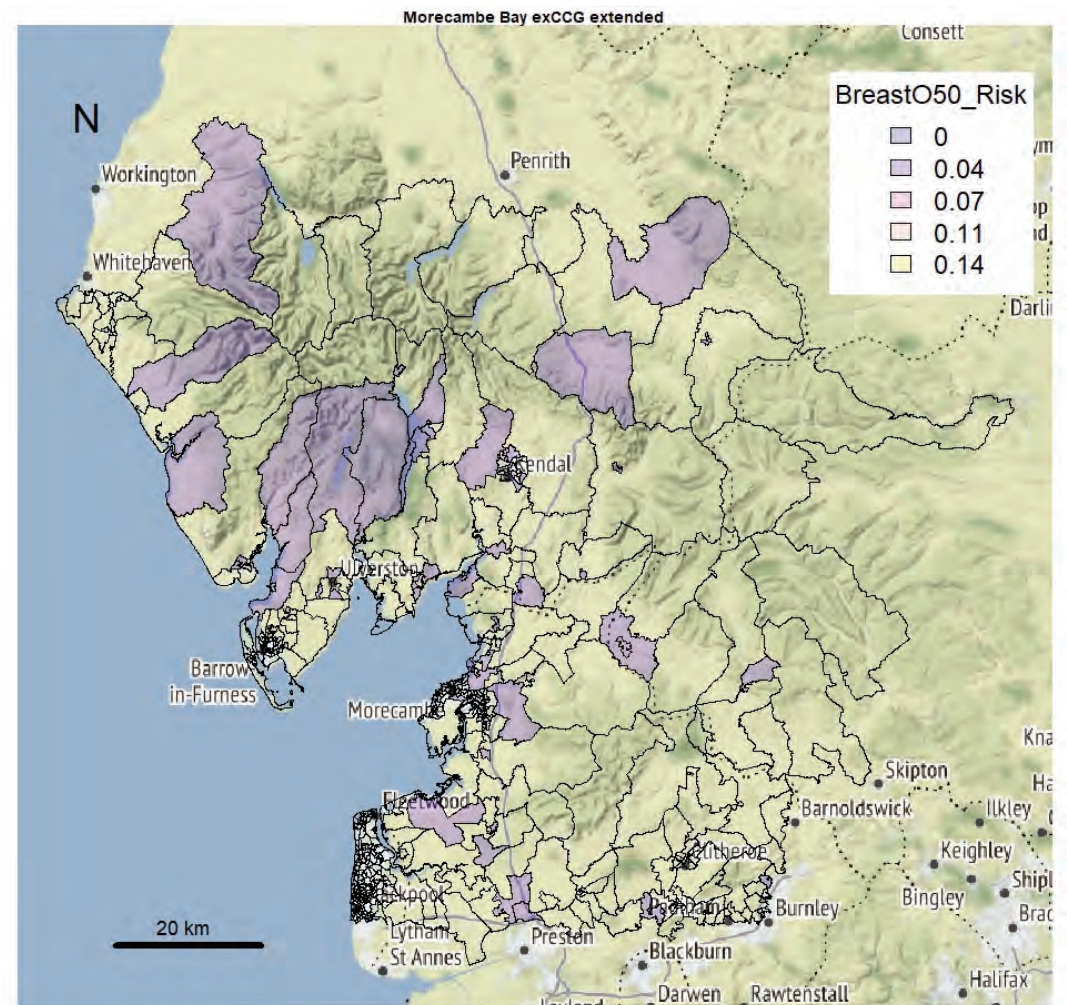

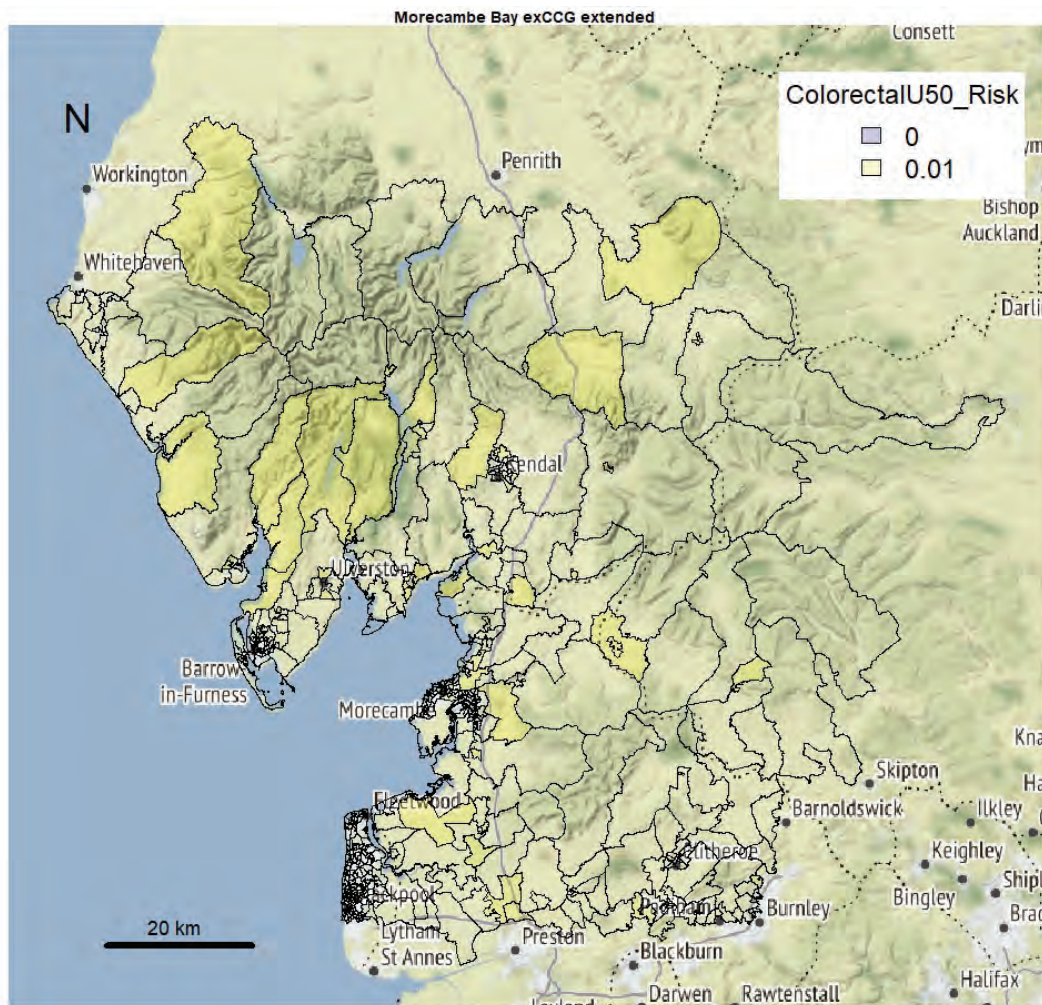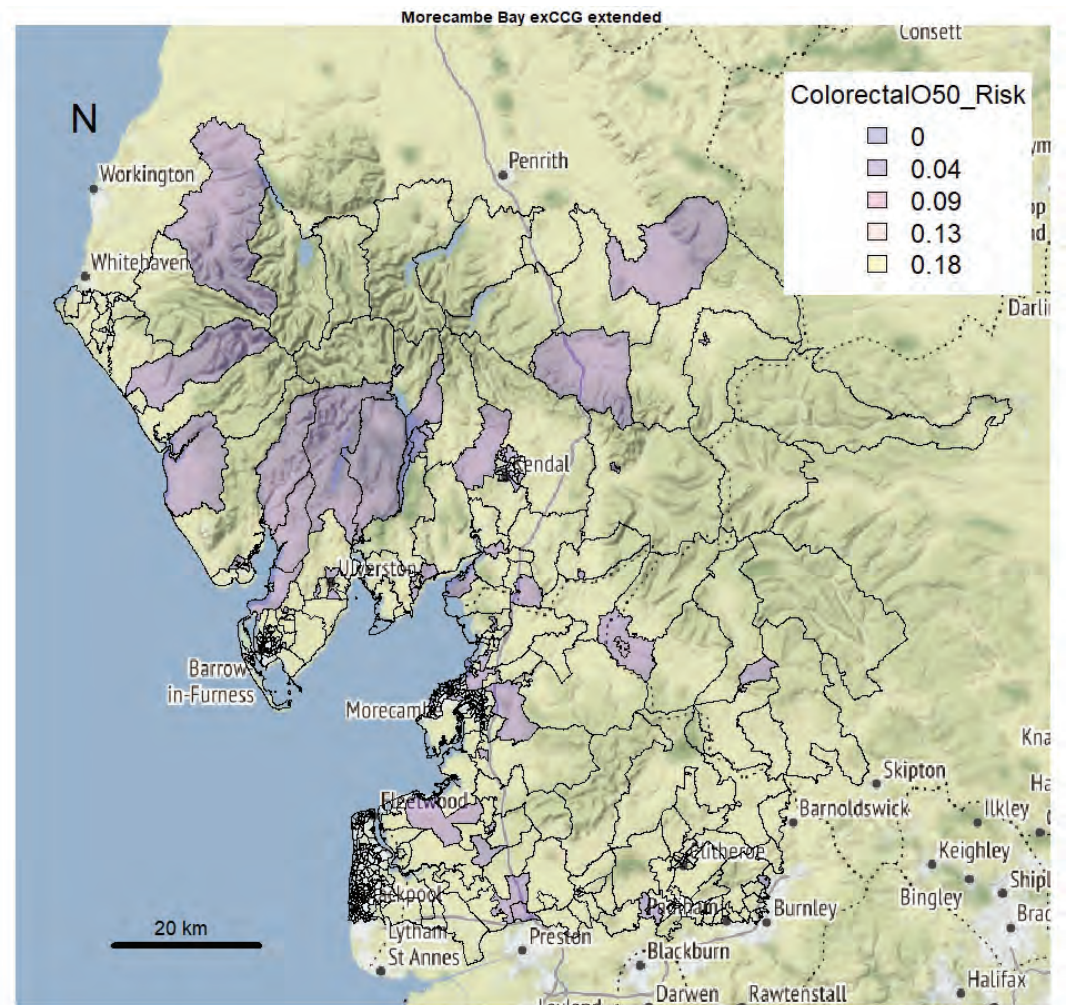



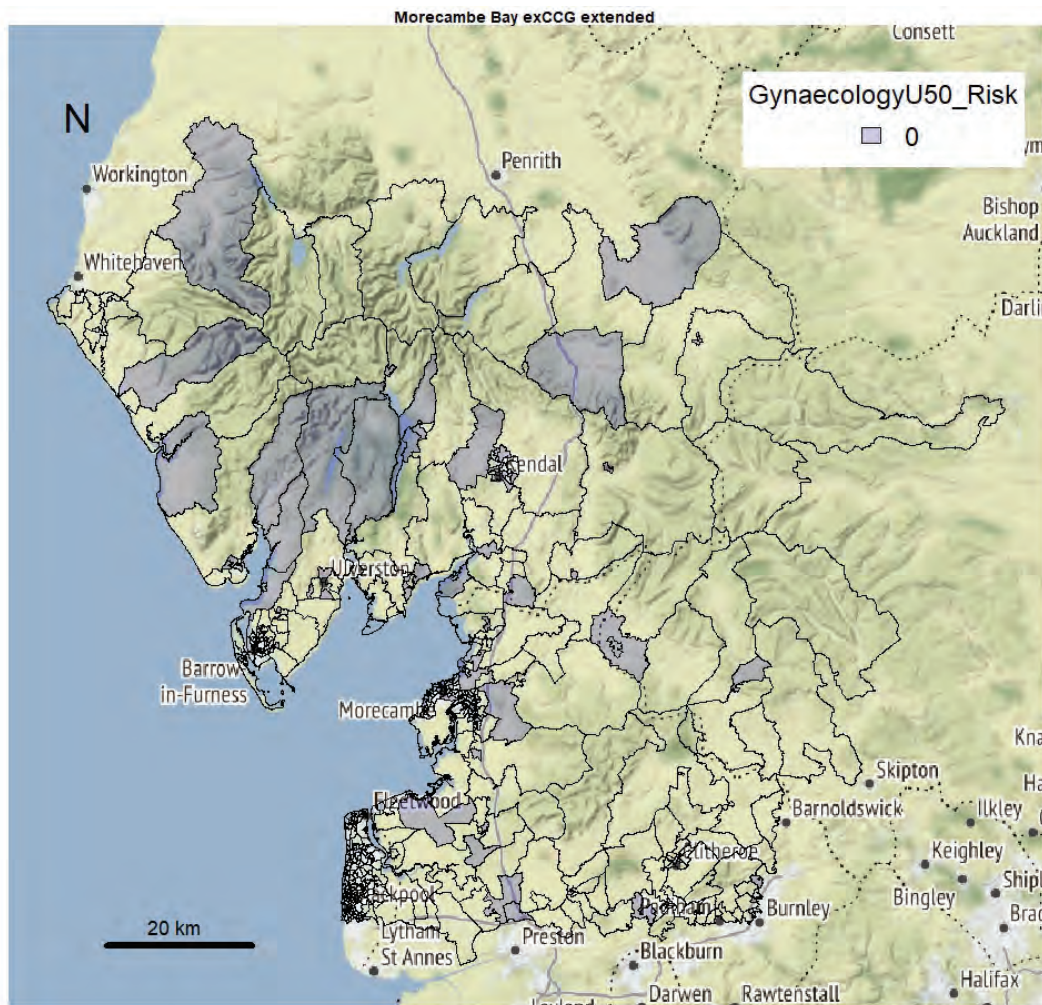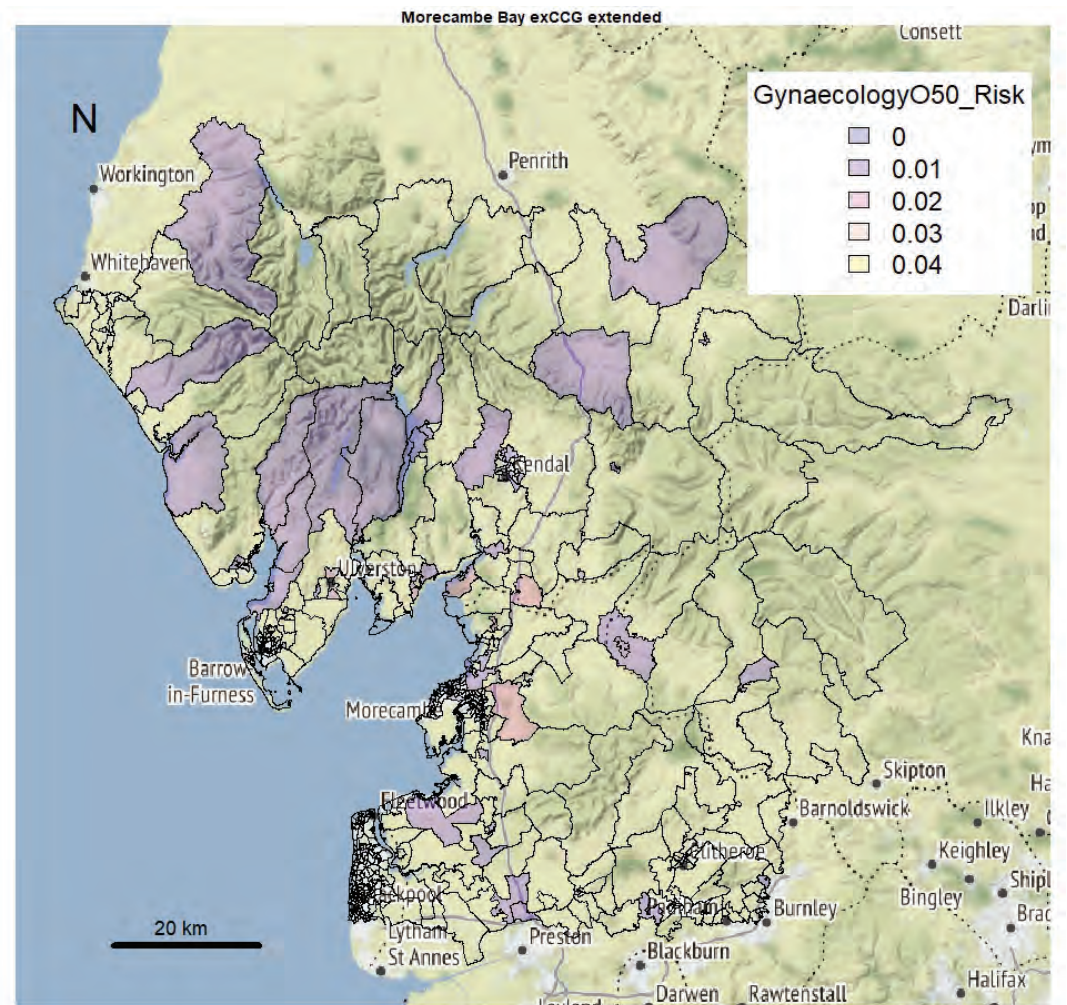

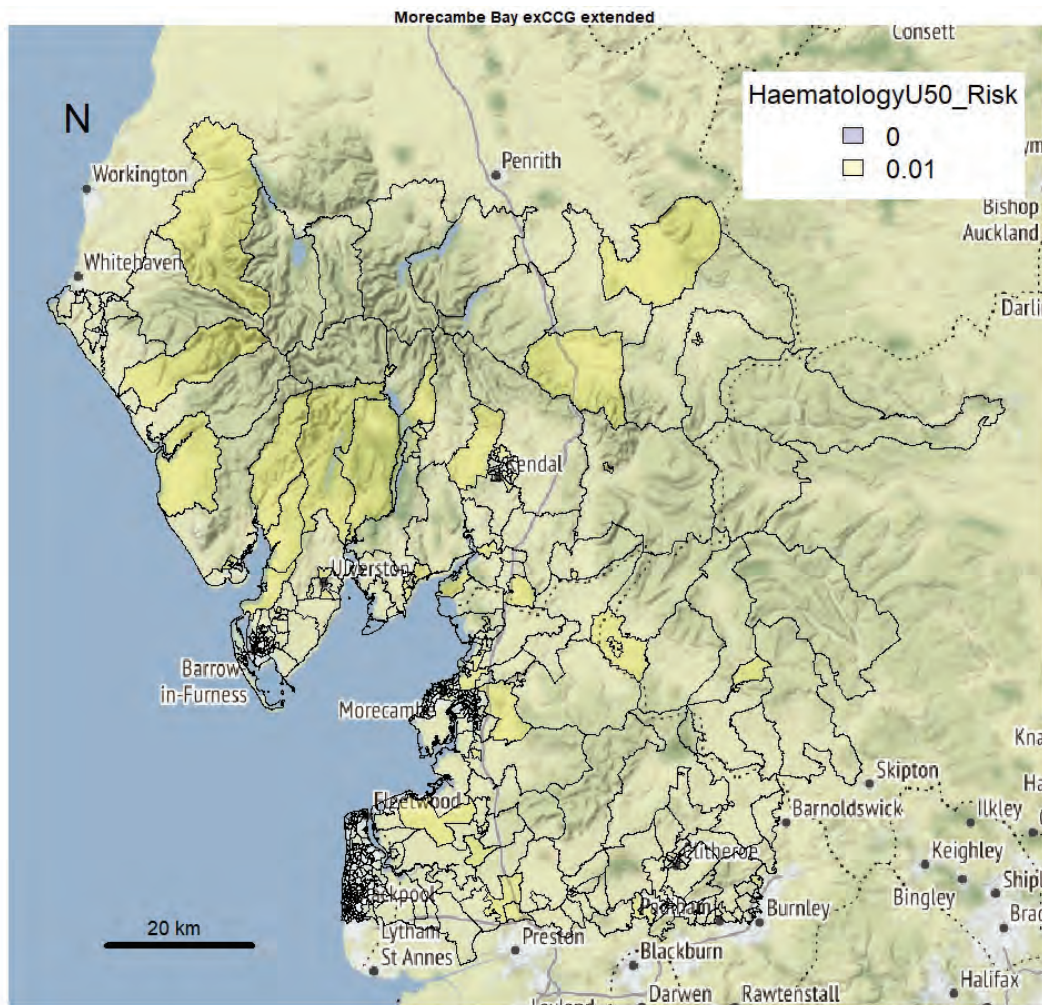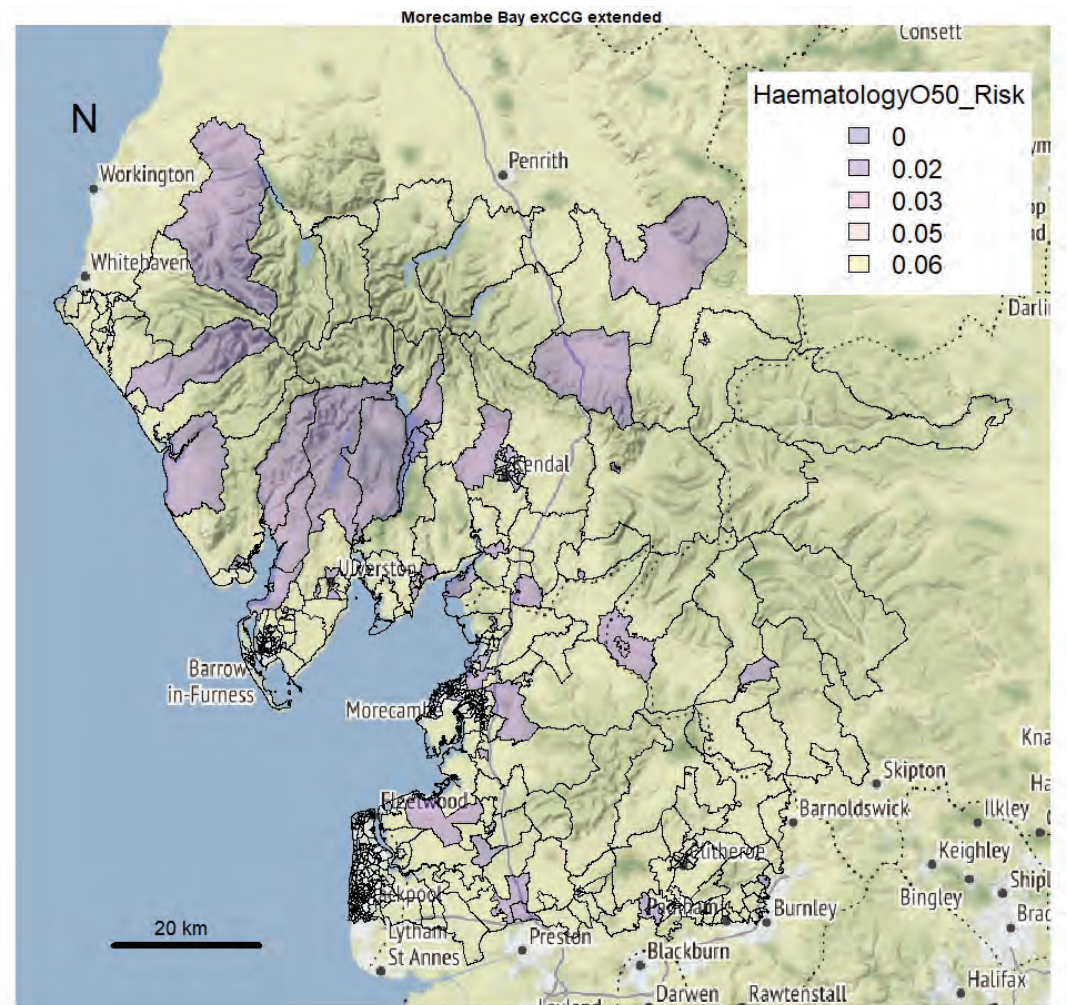

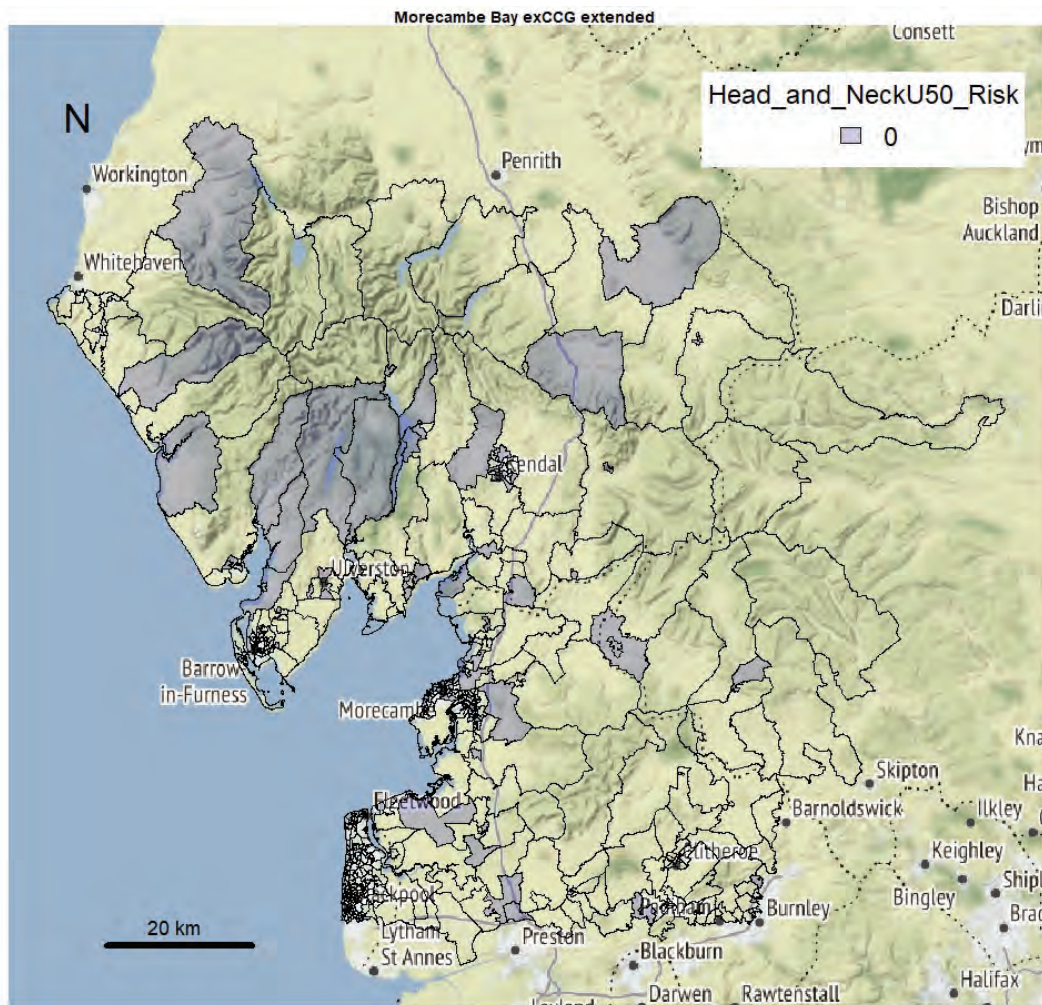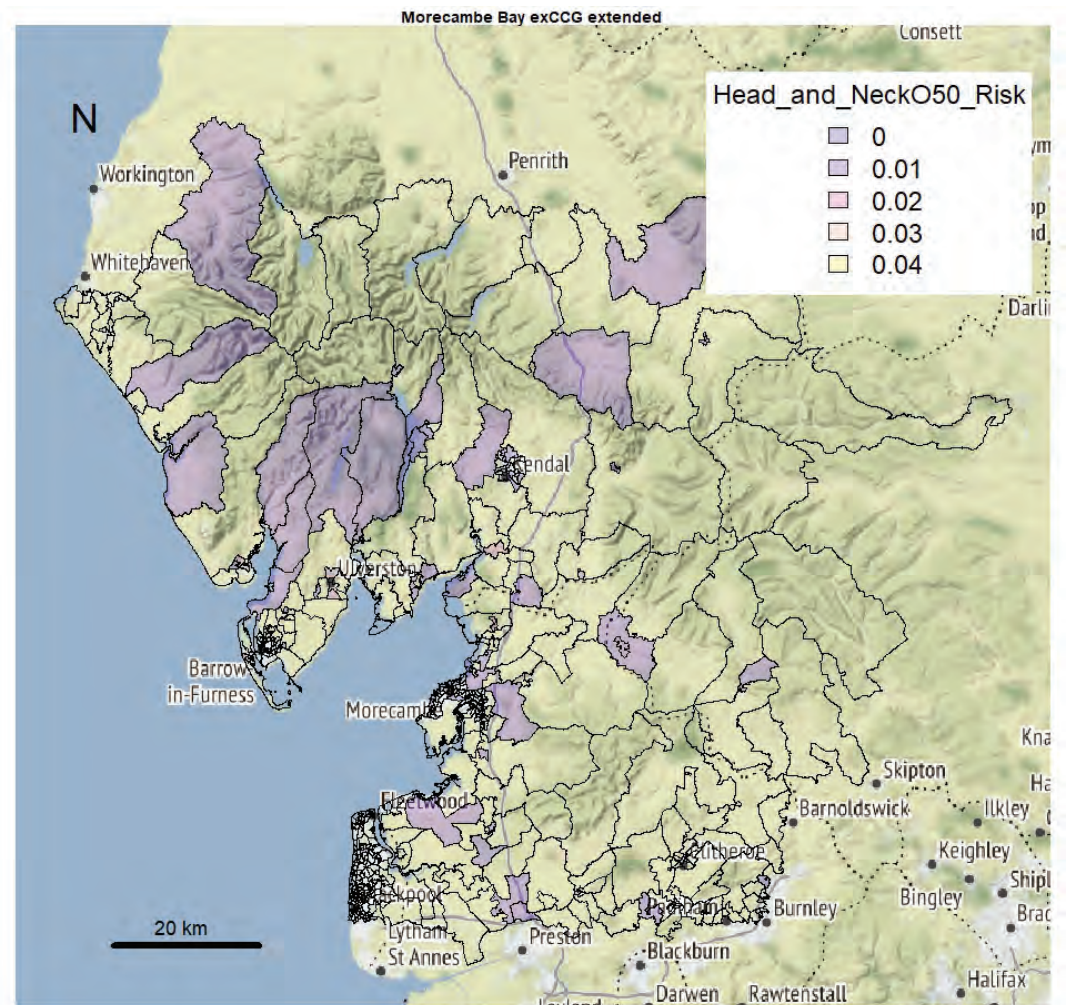

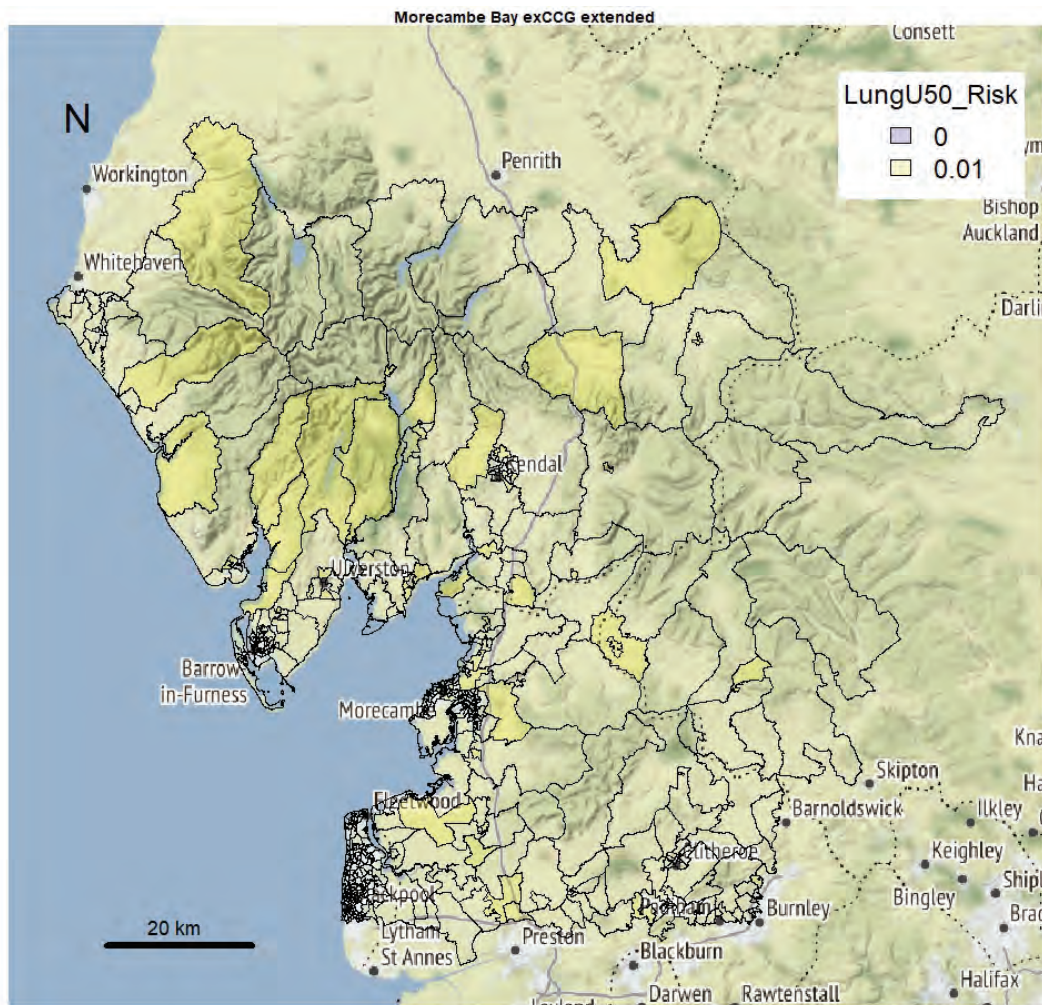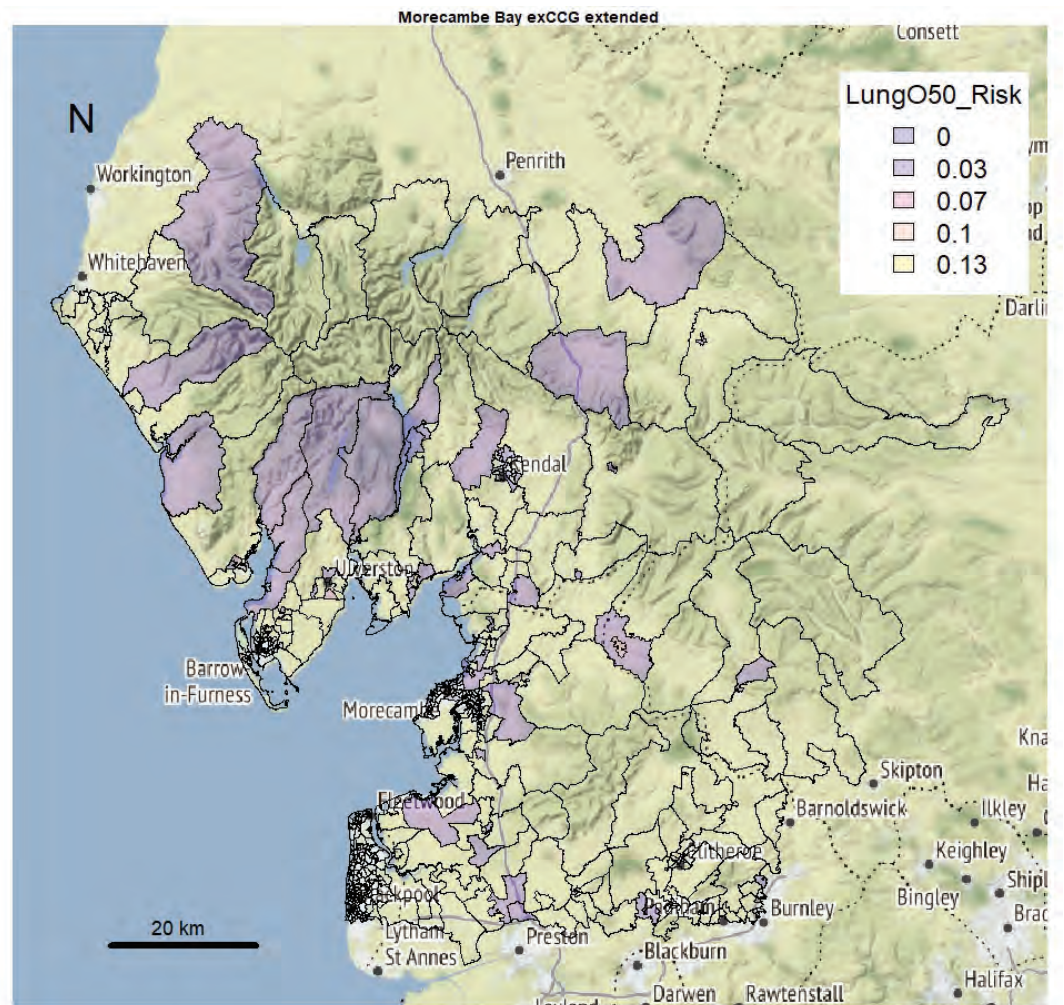

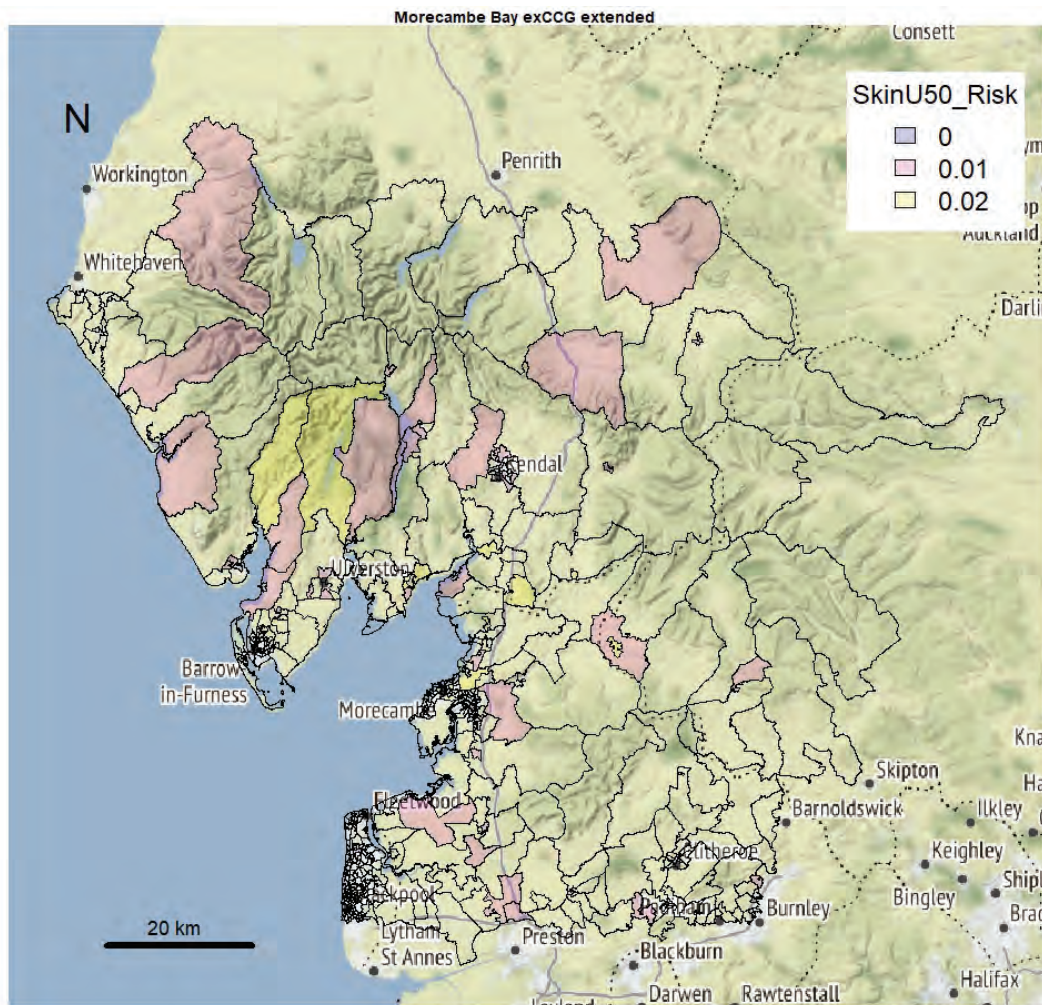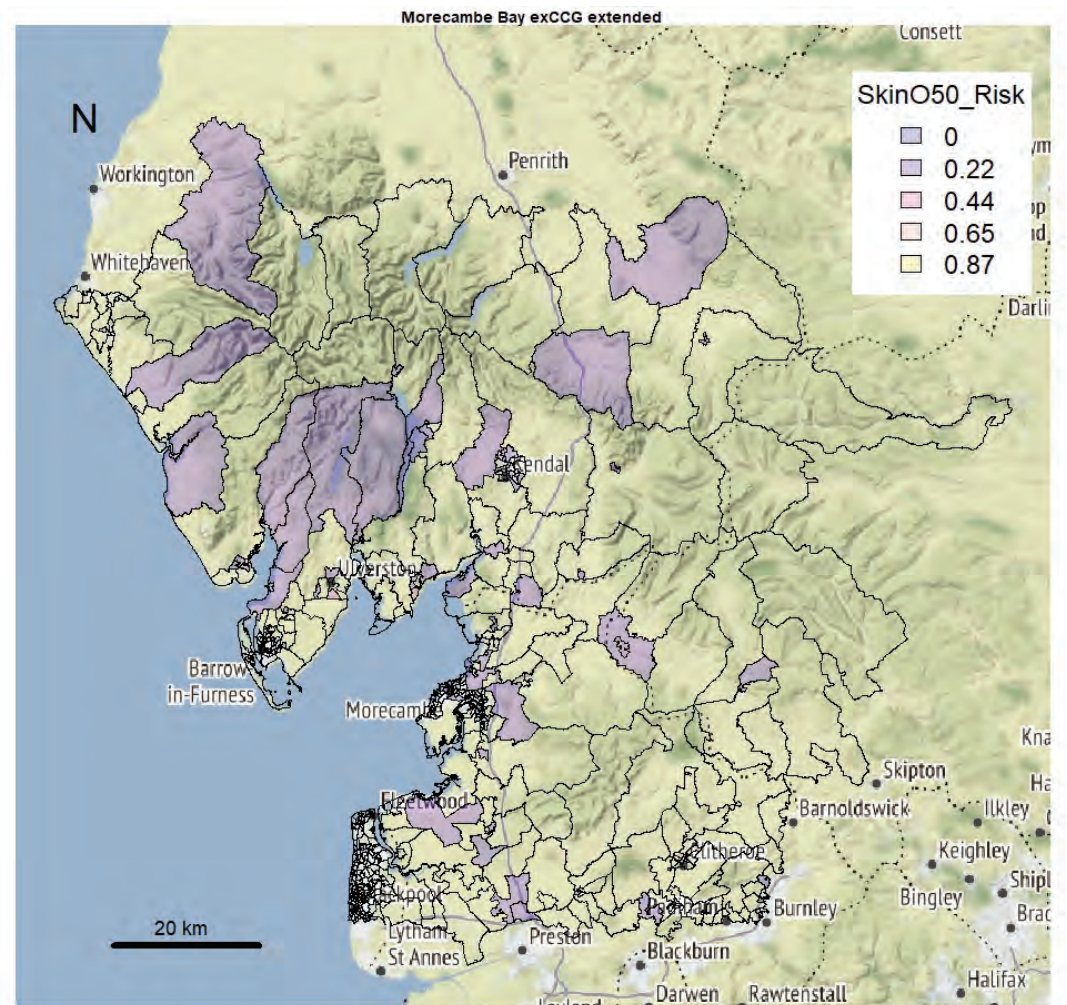

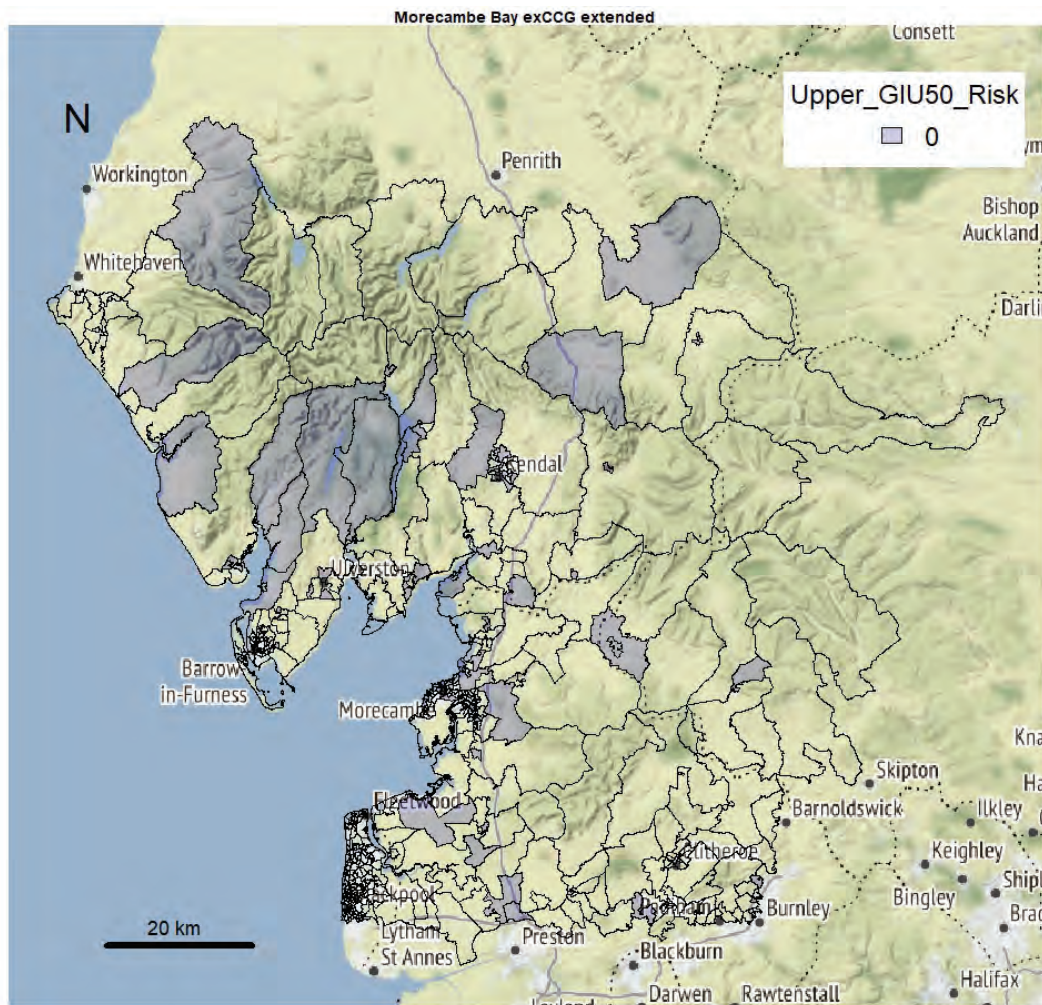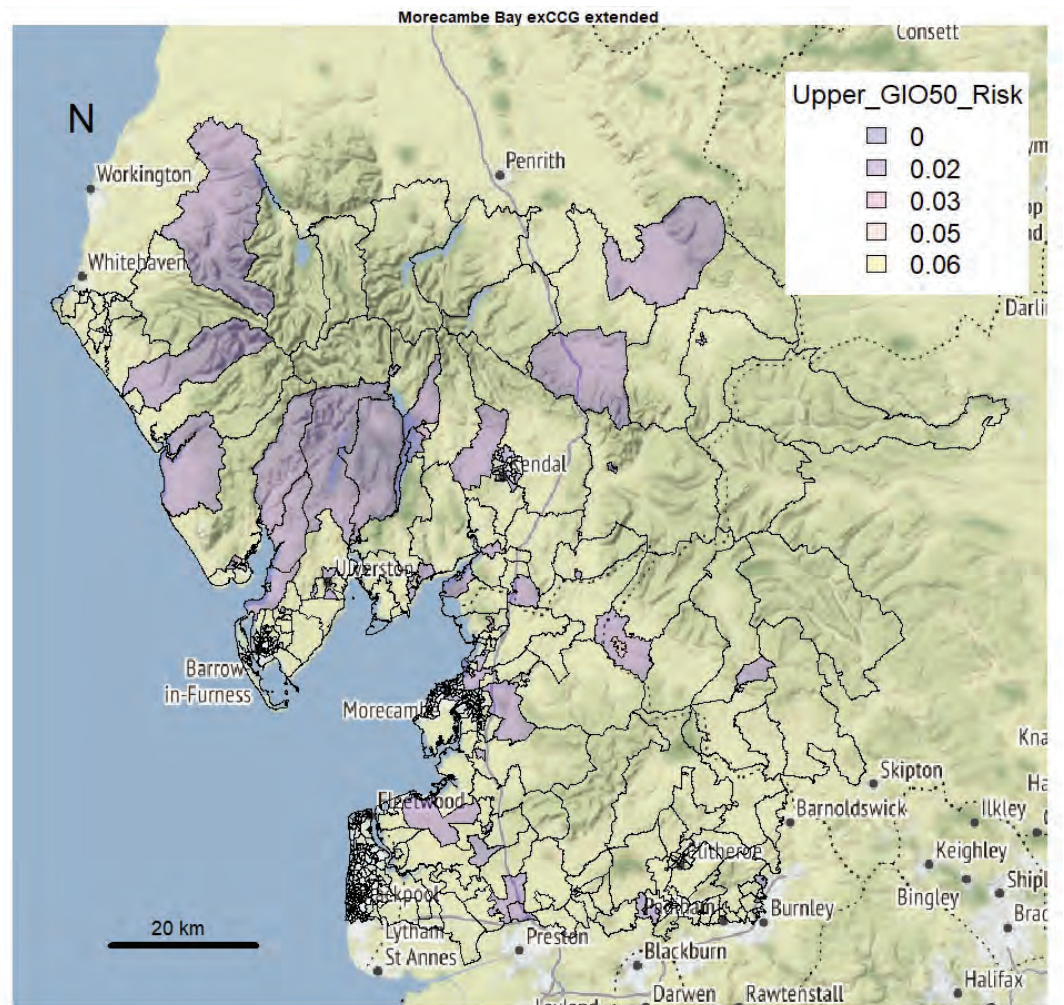

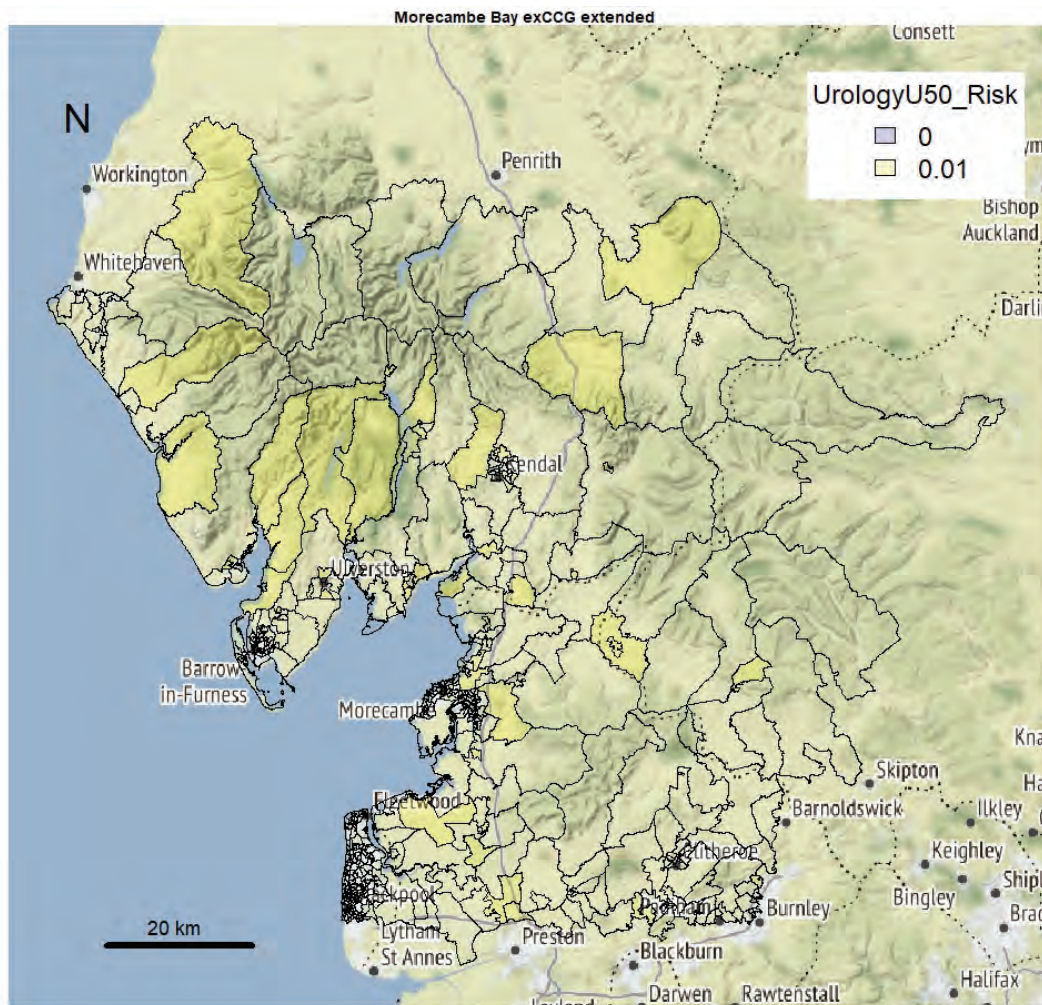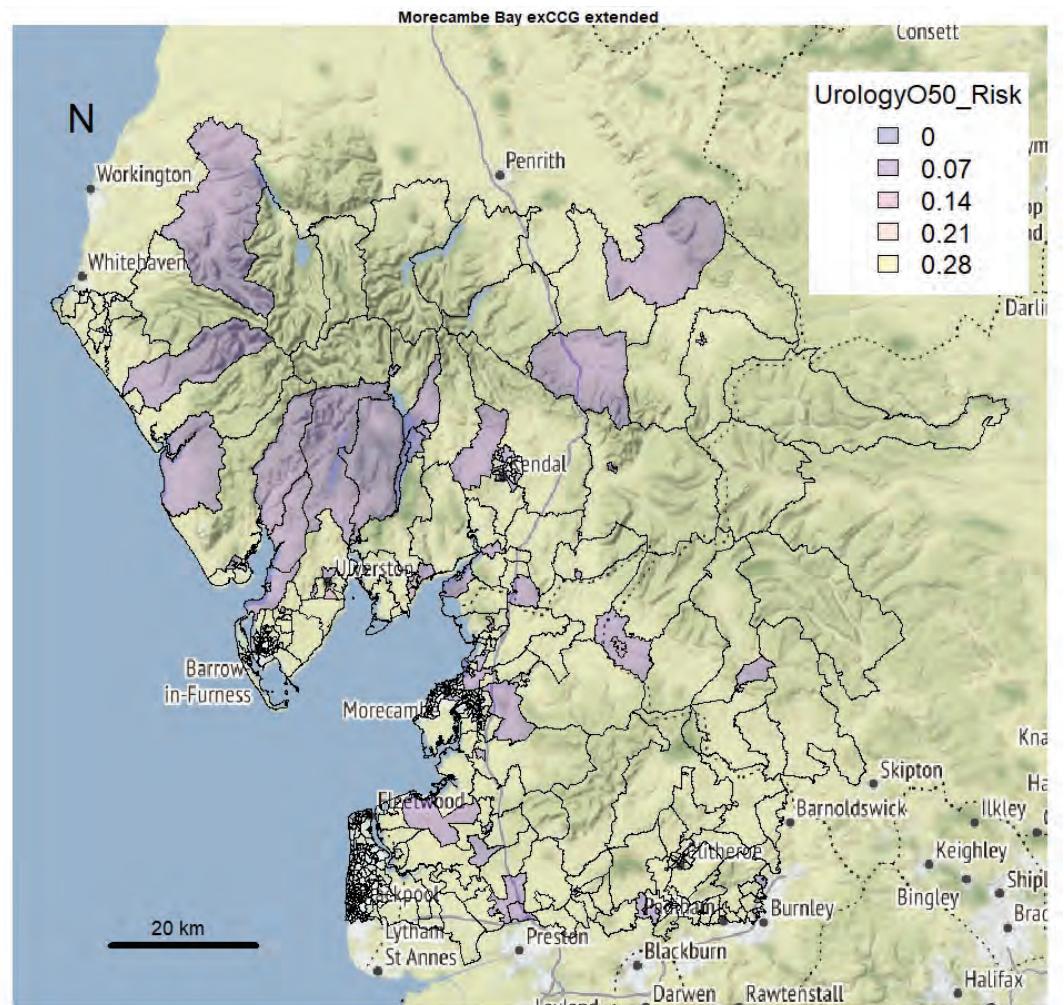

Lancaster and Morecambe

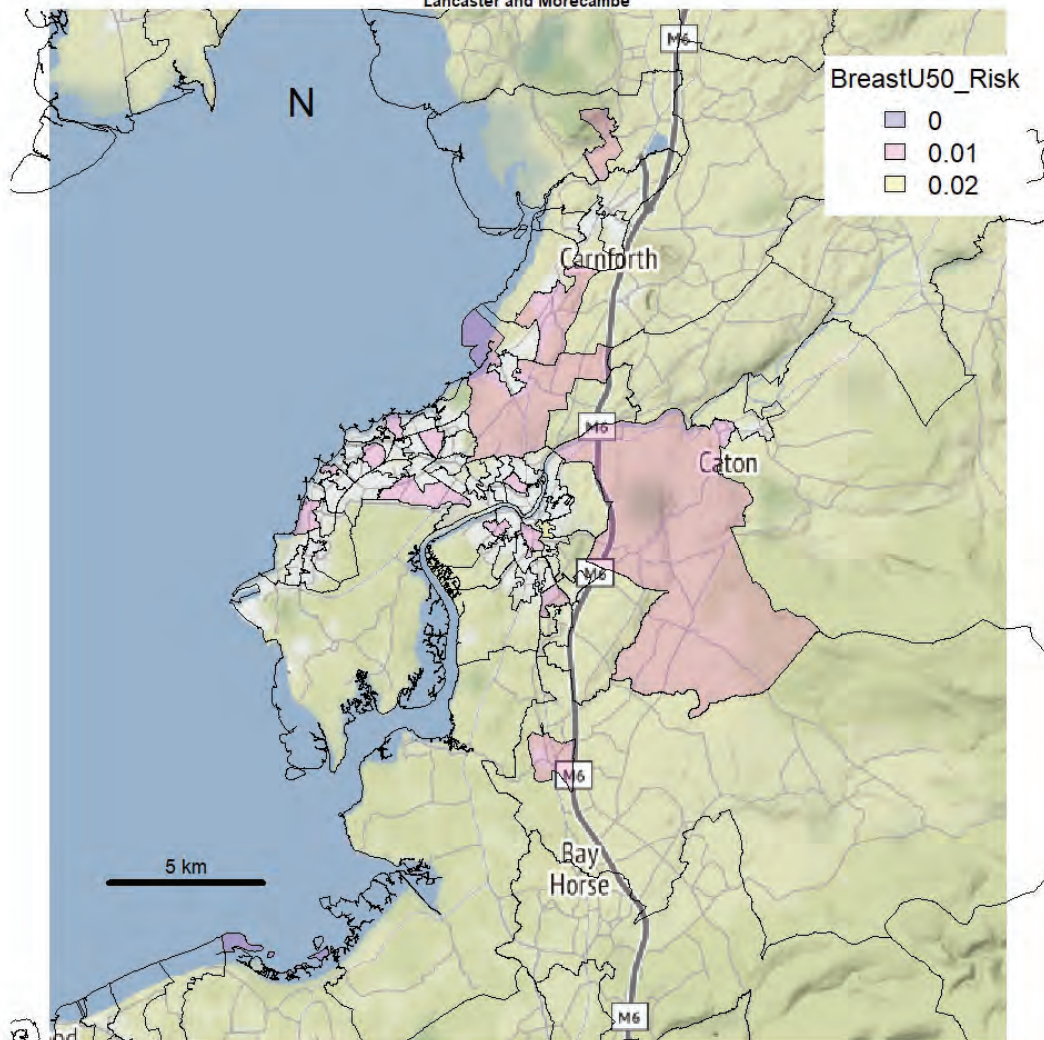

Lancaster and Morecambe

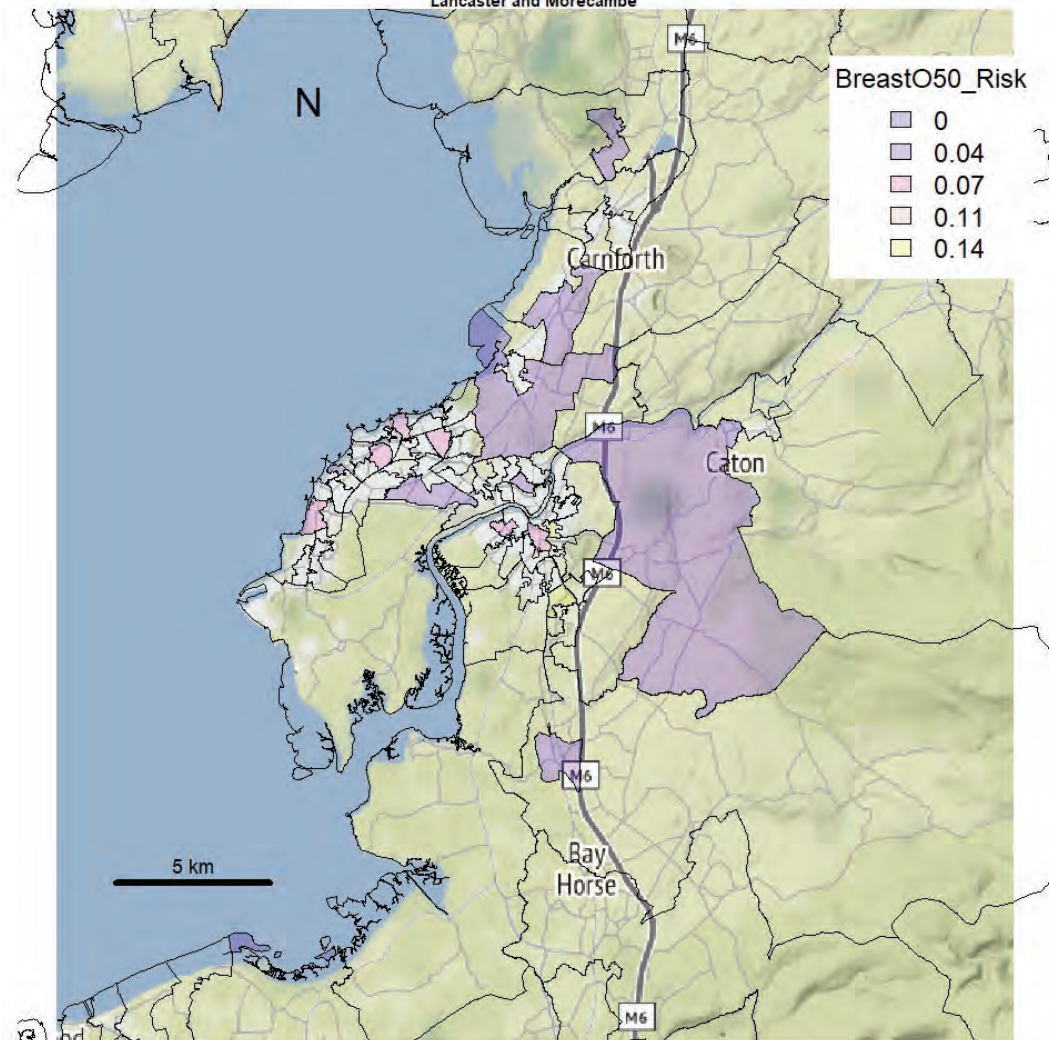



Lancaster and Morecambe

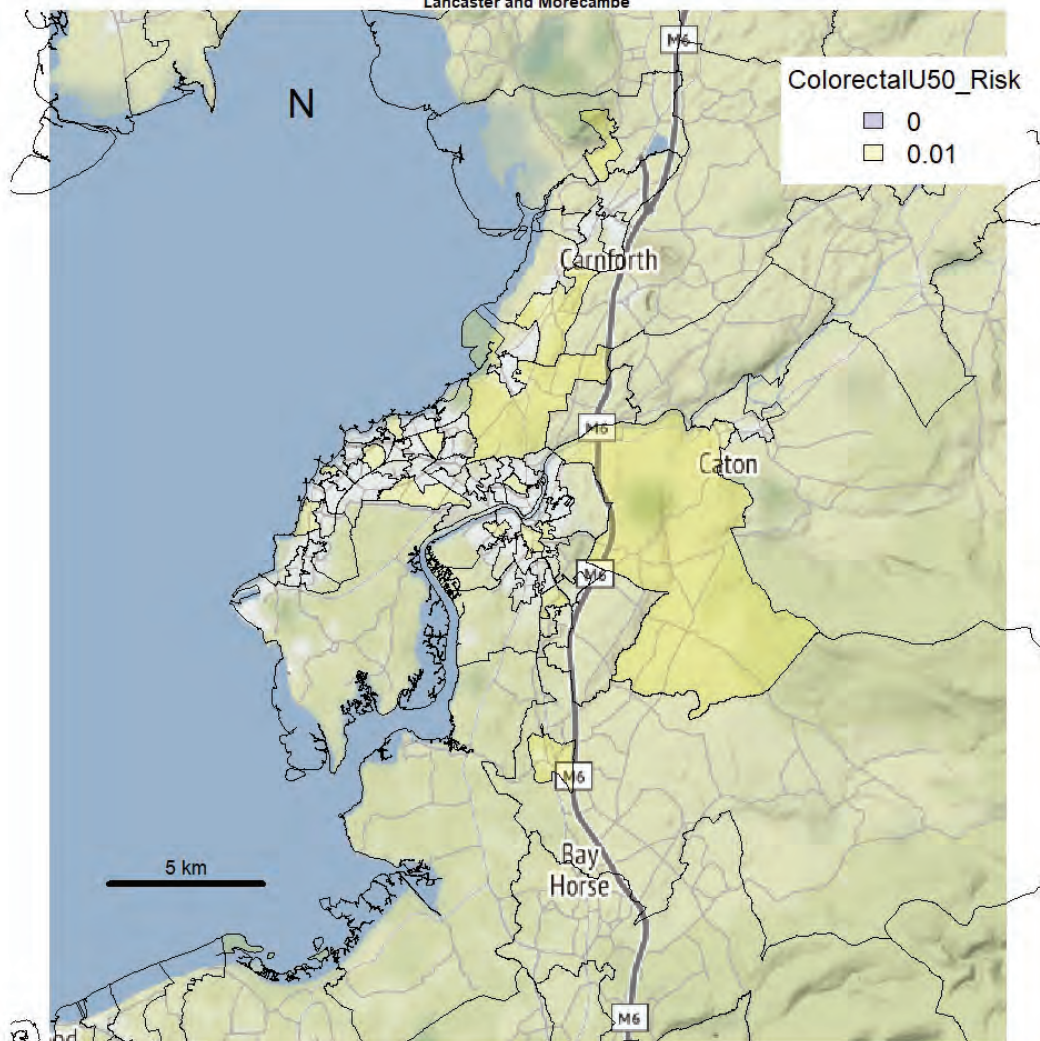

Lancaster and Morecambe

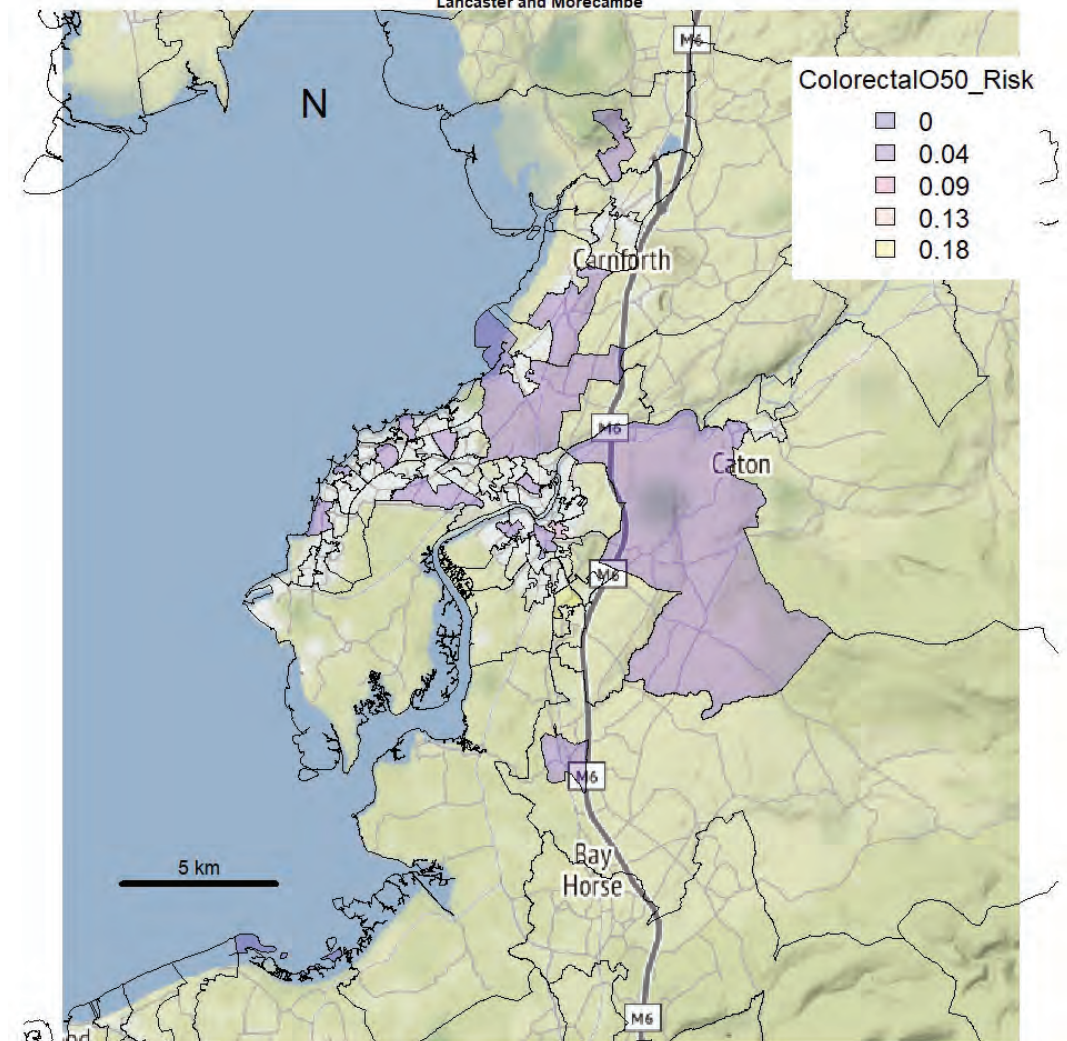

Lancaster and Morecambe

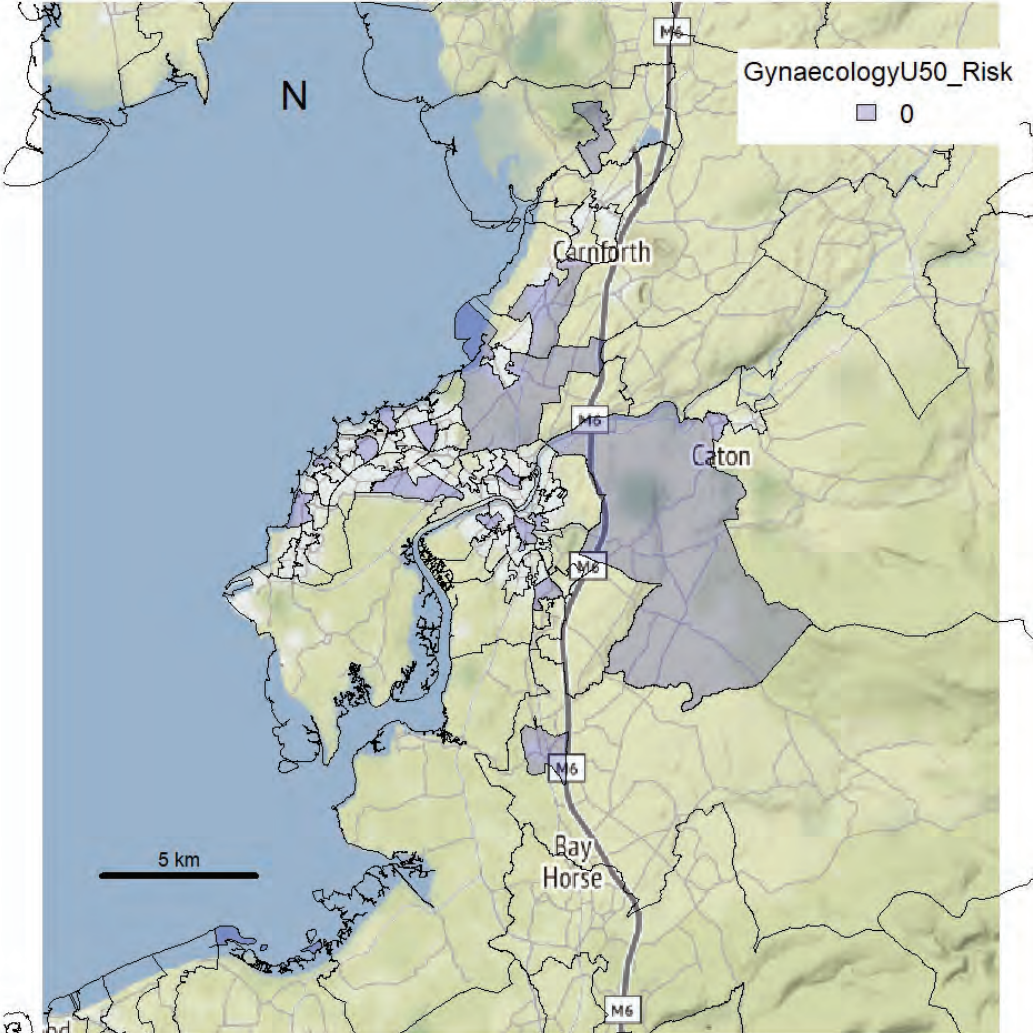

Lancaster and Morecambe

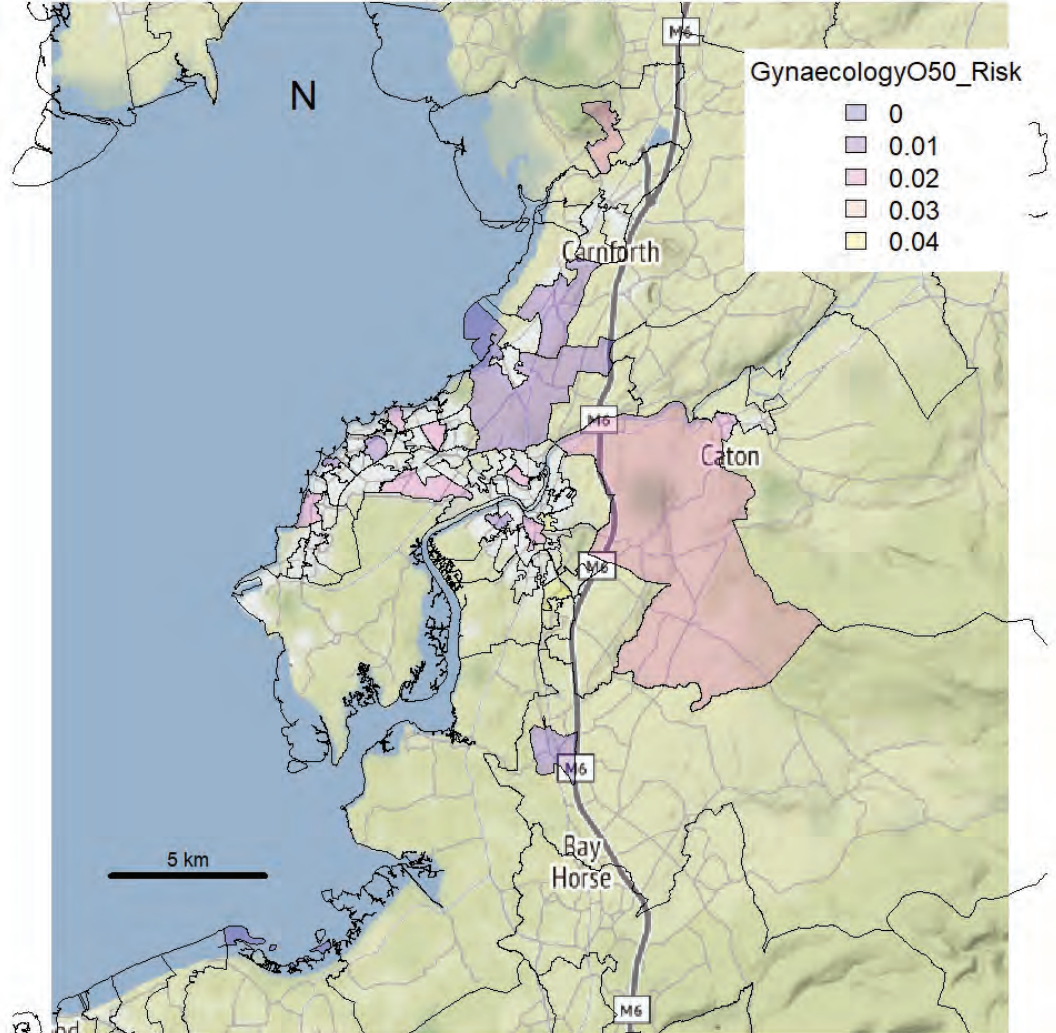

Lancaster and Morecambe

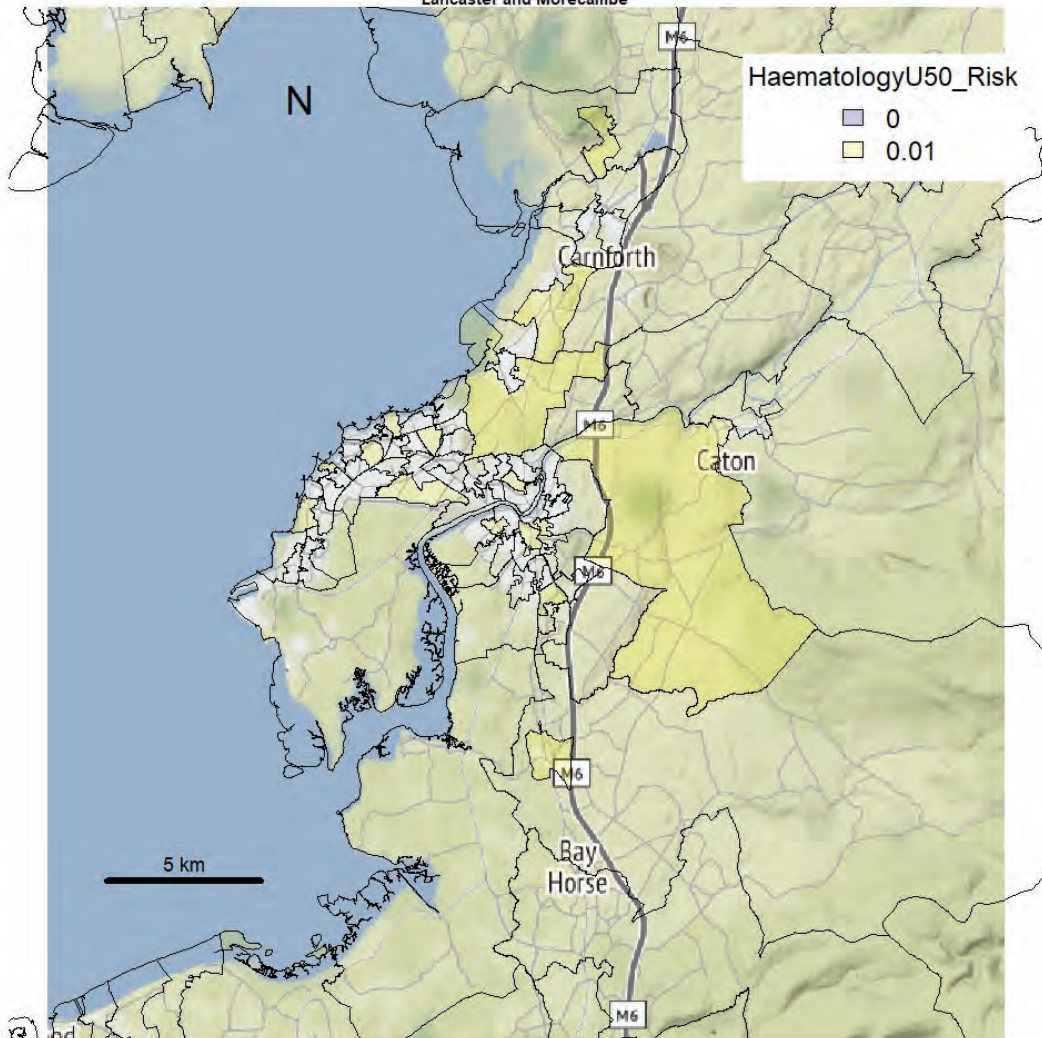

Lancaster and Morecambe

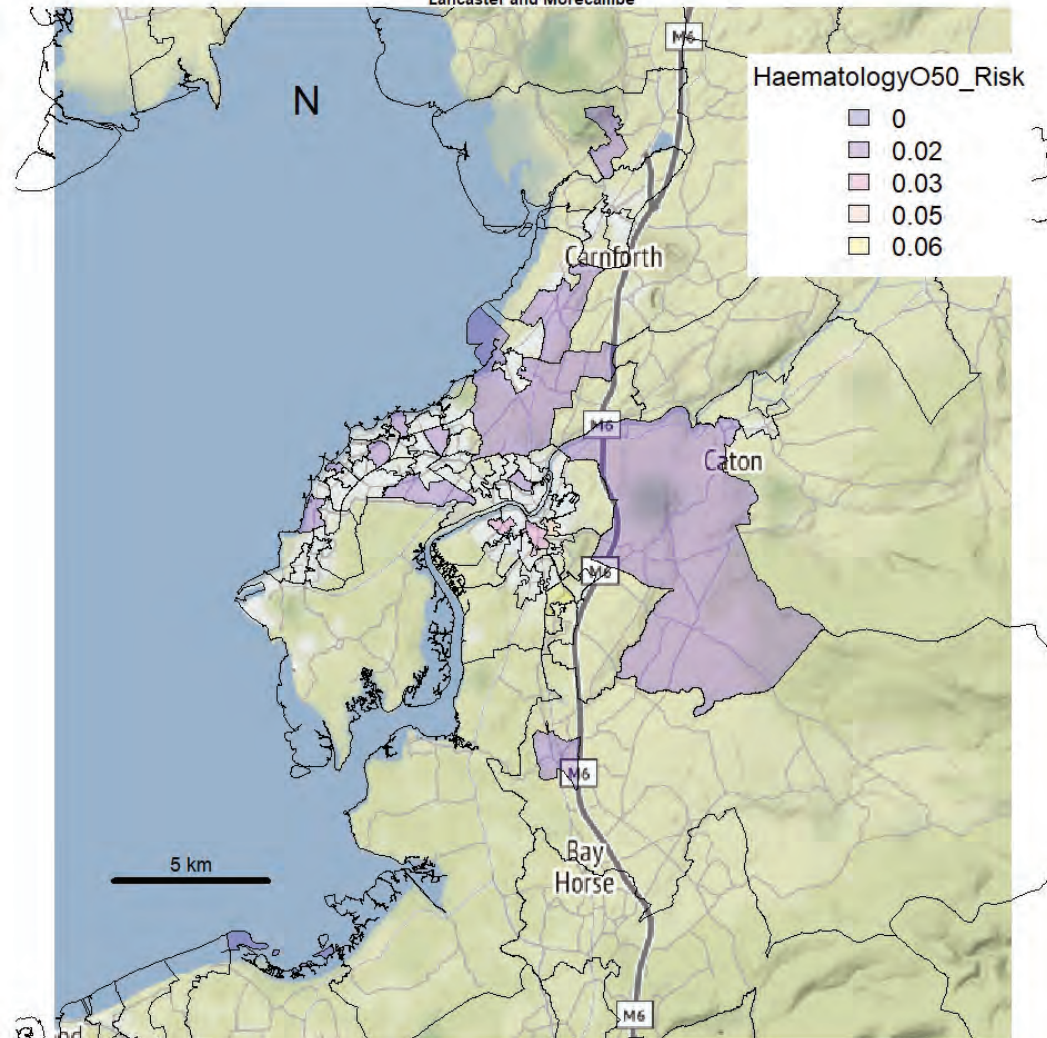

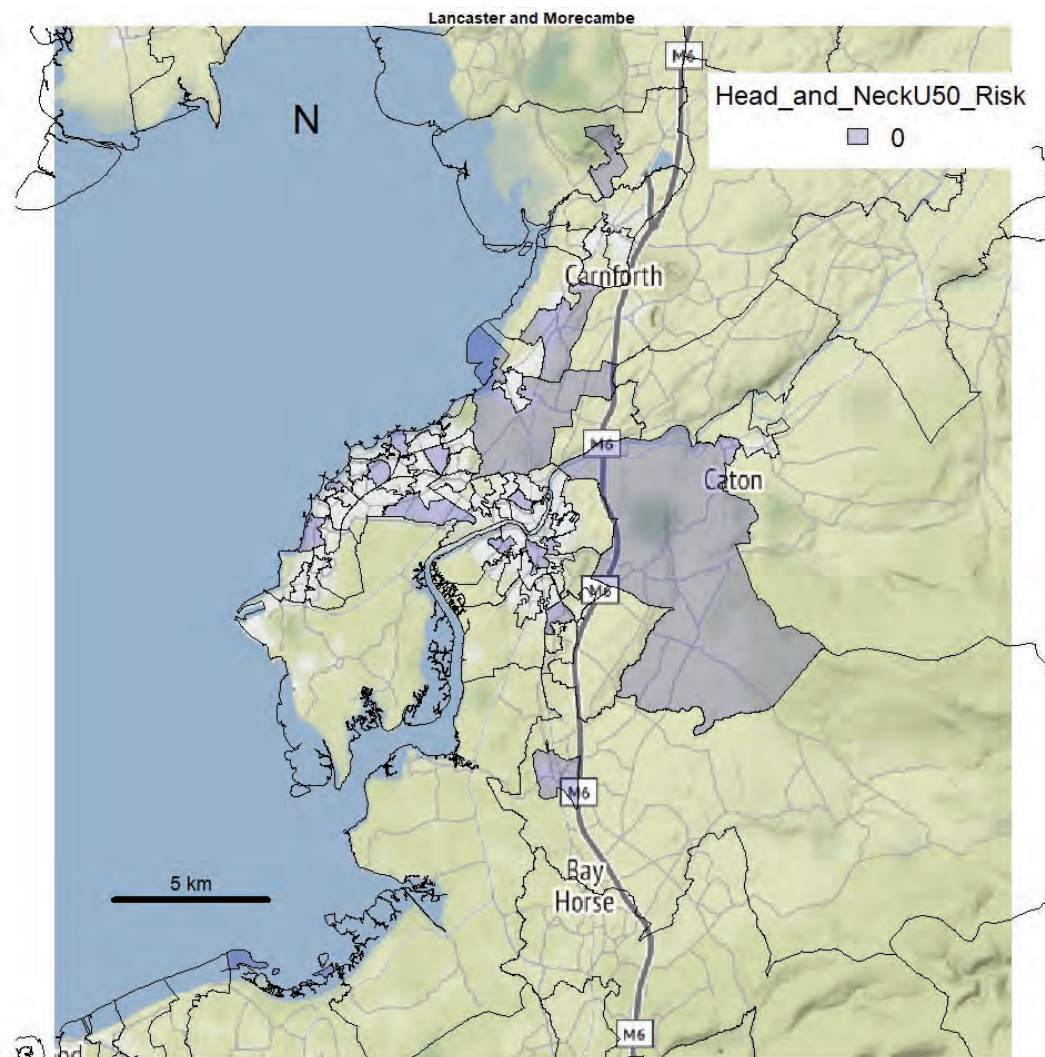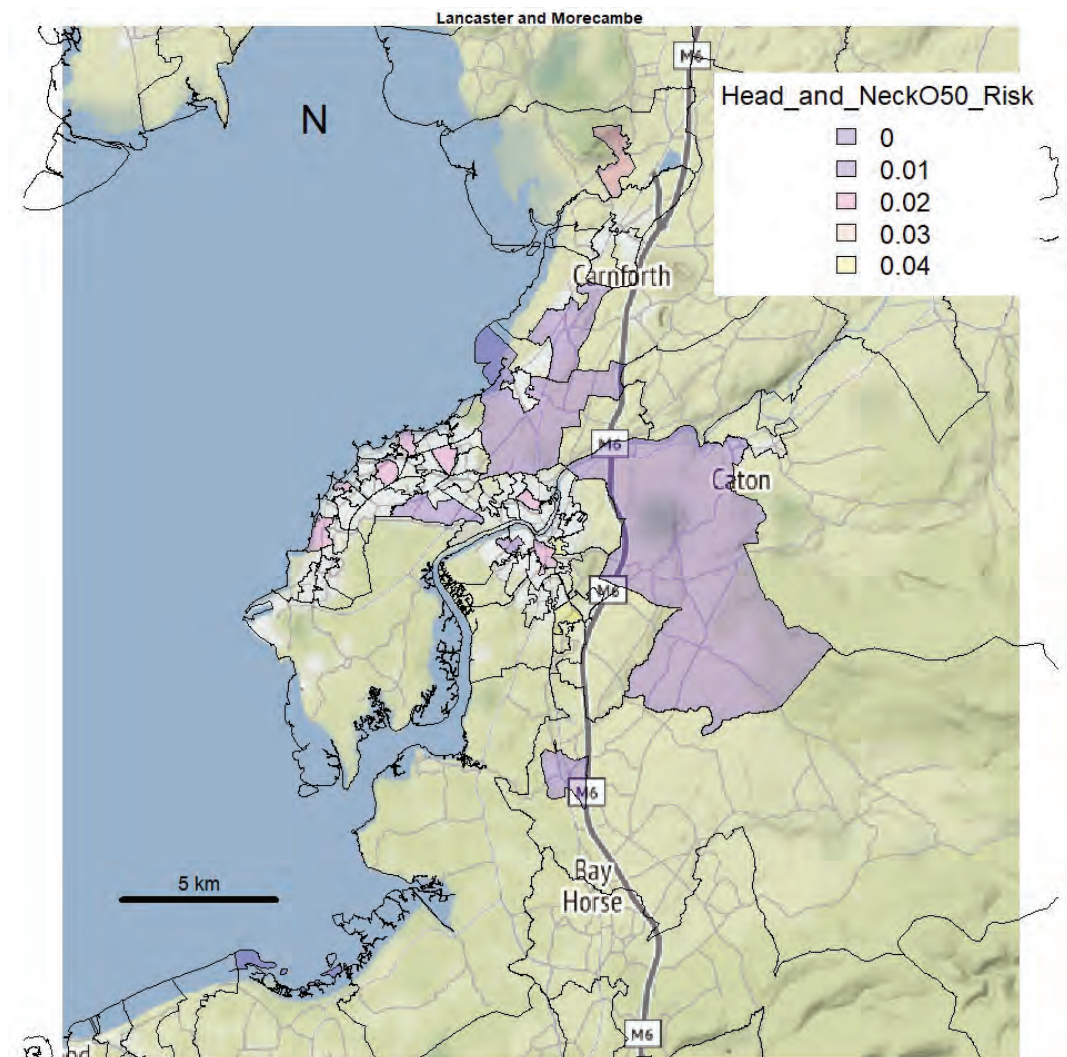

Lancaster and Morecambe

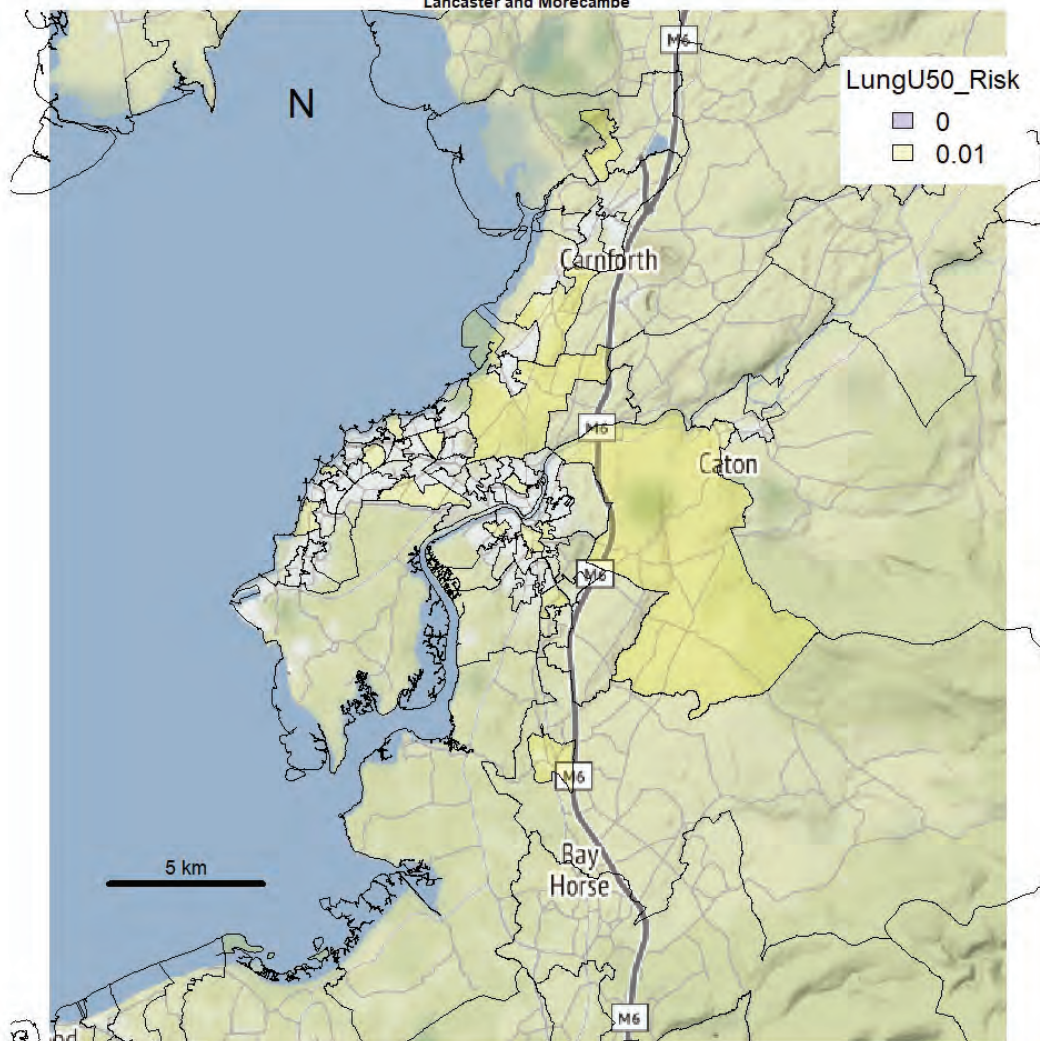

Lancaster and Morecambe

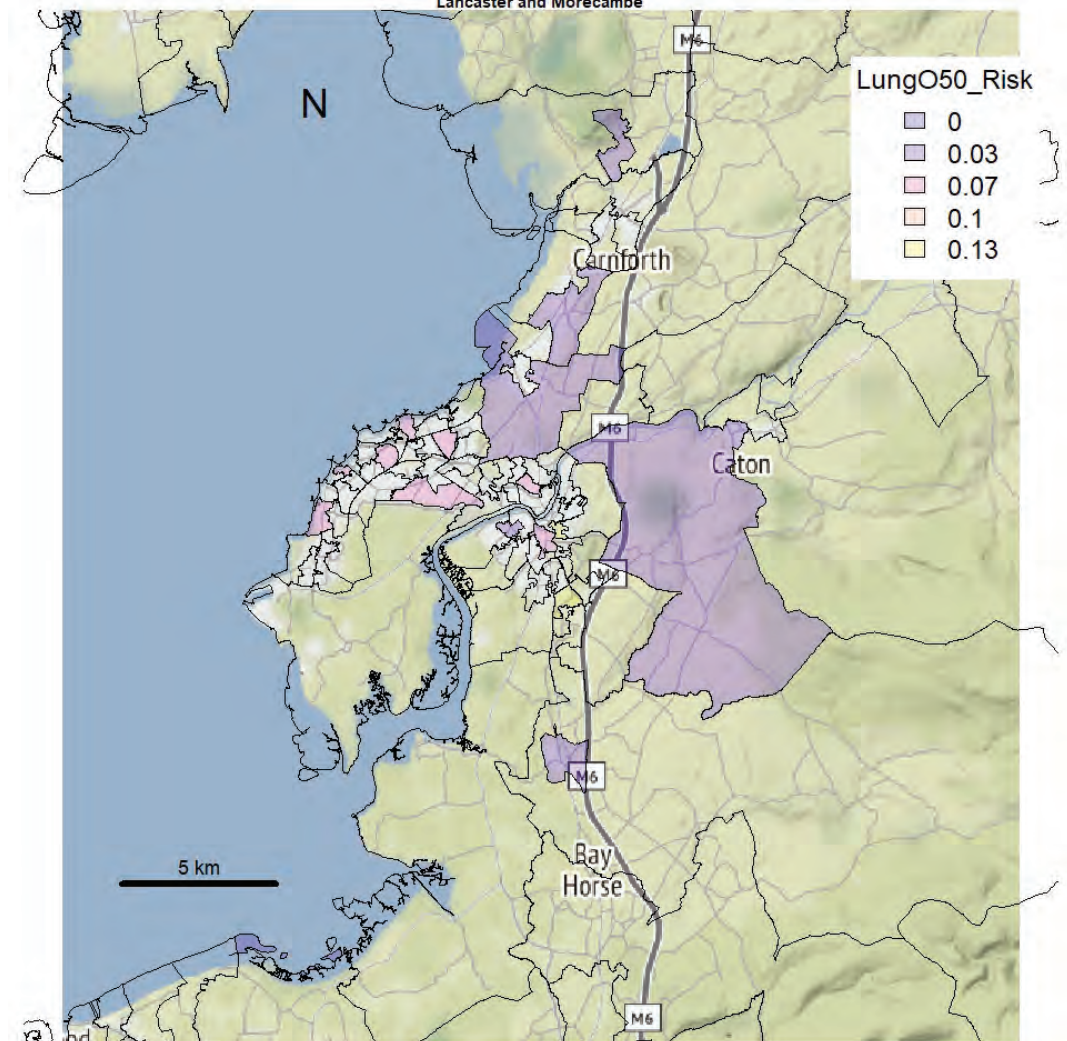

Lancaster and Morecambe

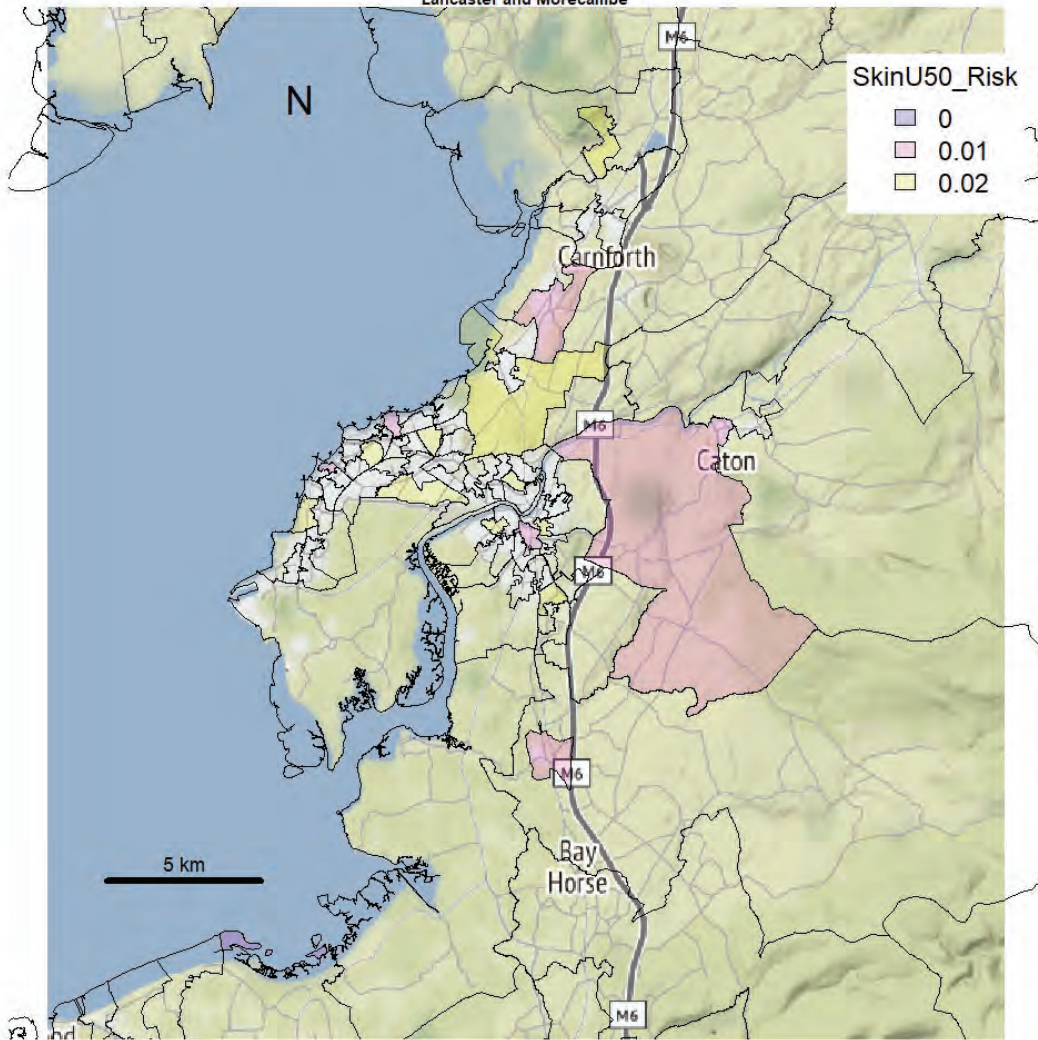

Lancaster and Morecambe

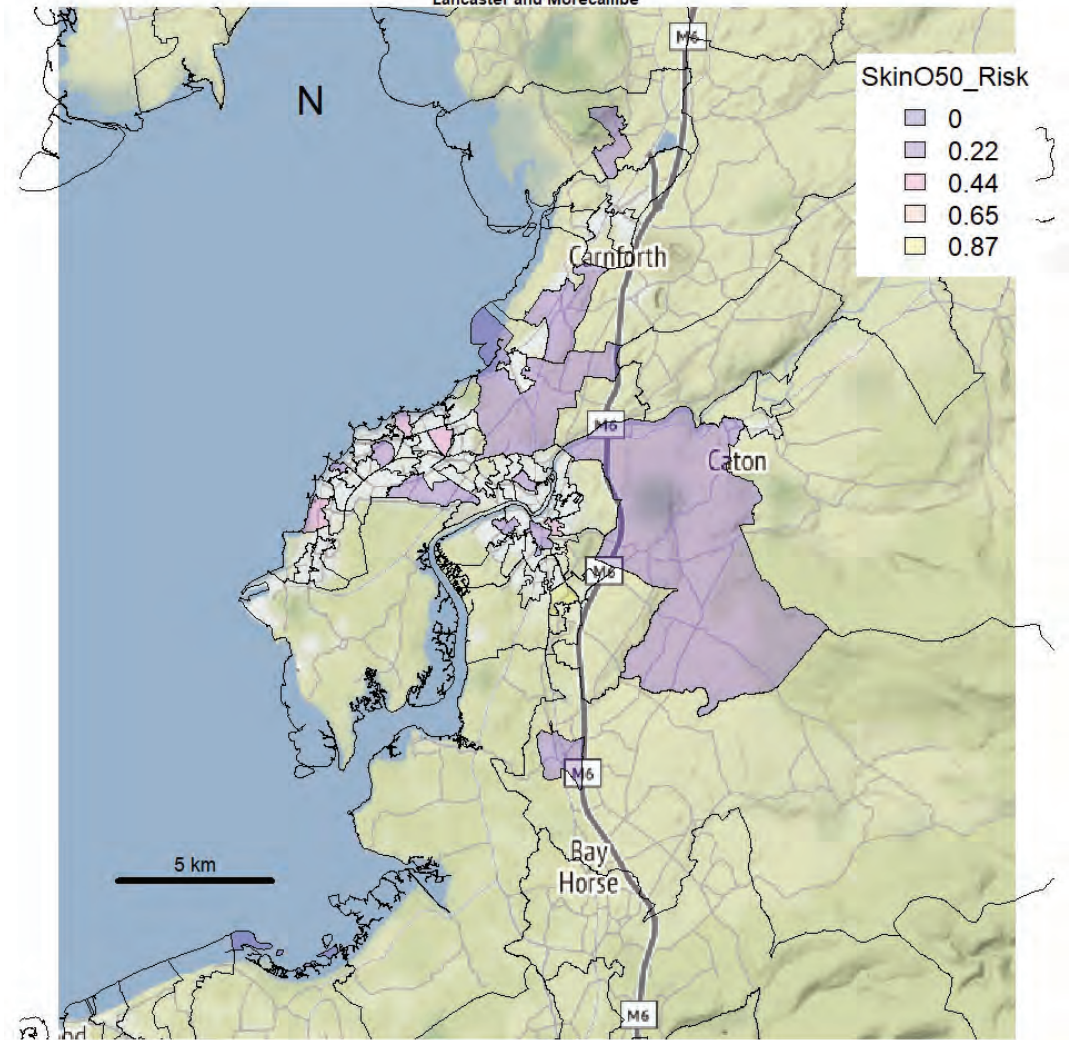

Lancaster and Morecambe

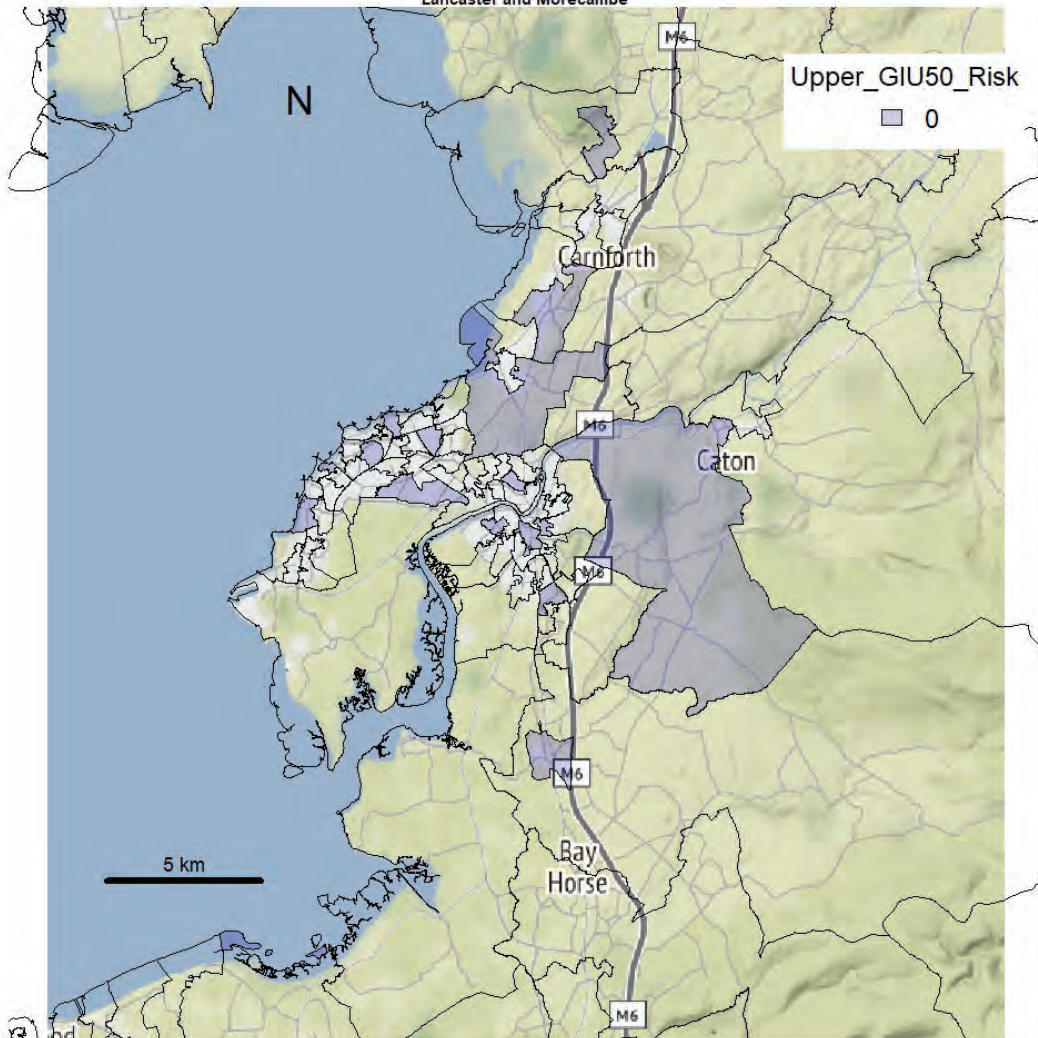

Lancaster and Morecambe

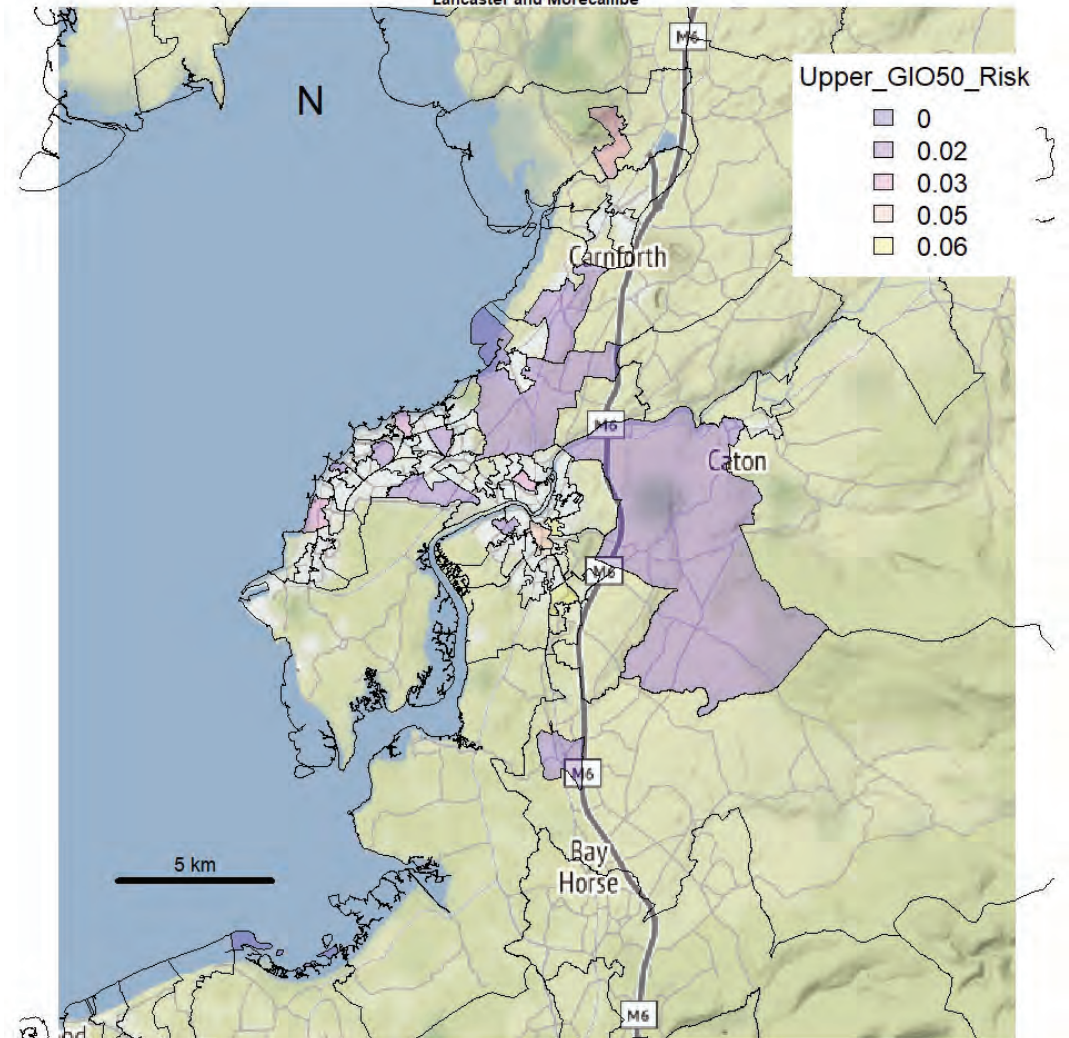

Lancaster and Morecambe

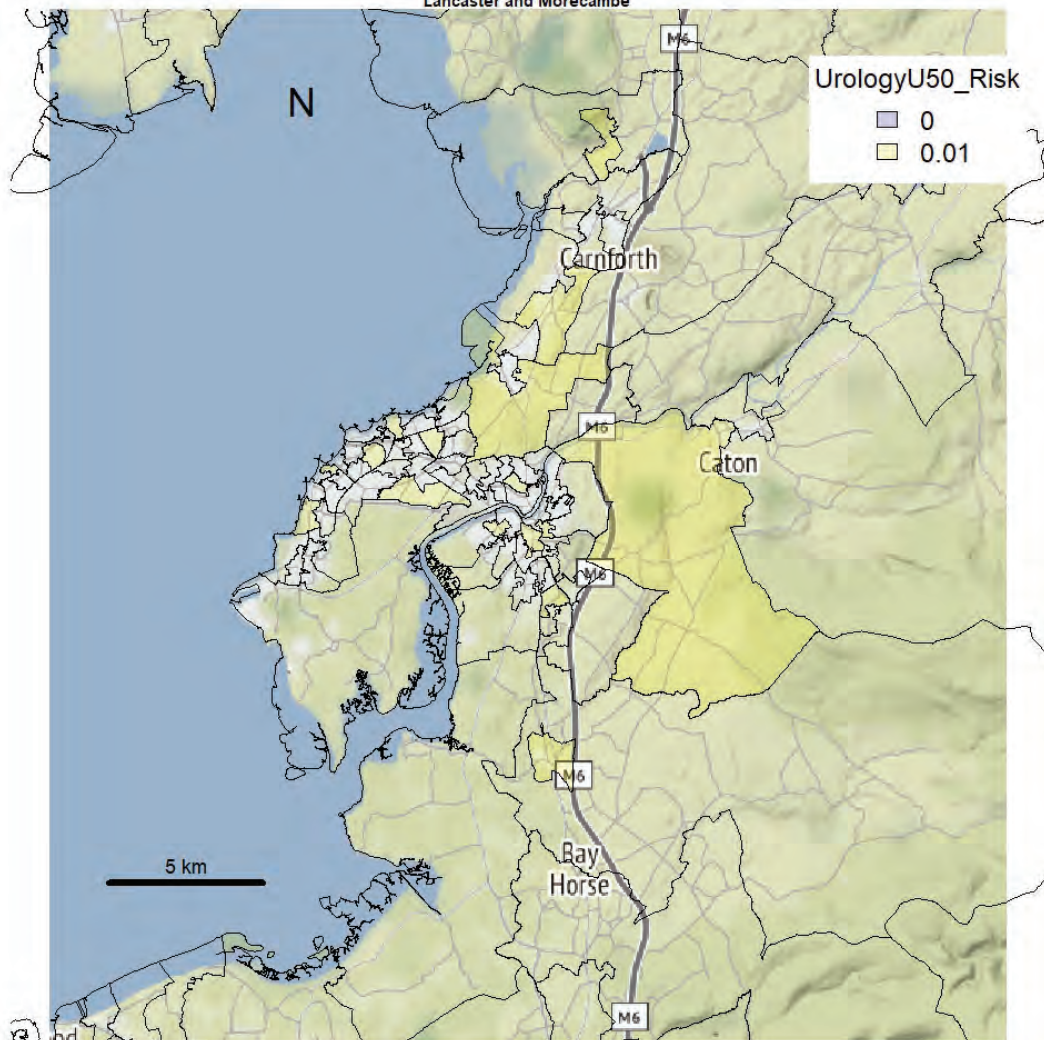

Lancaster and Morecambe

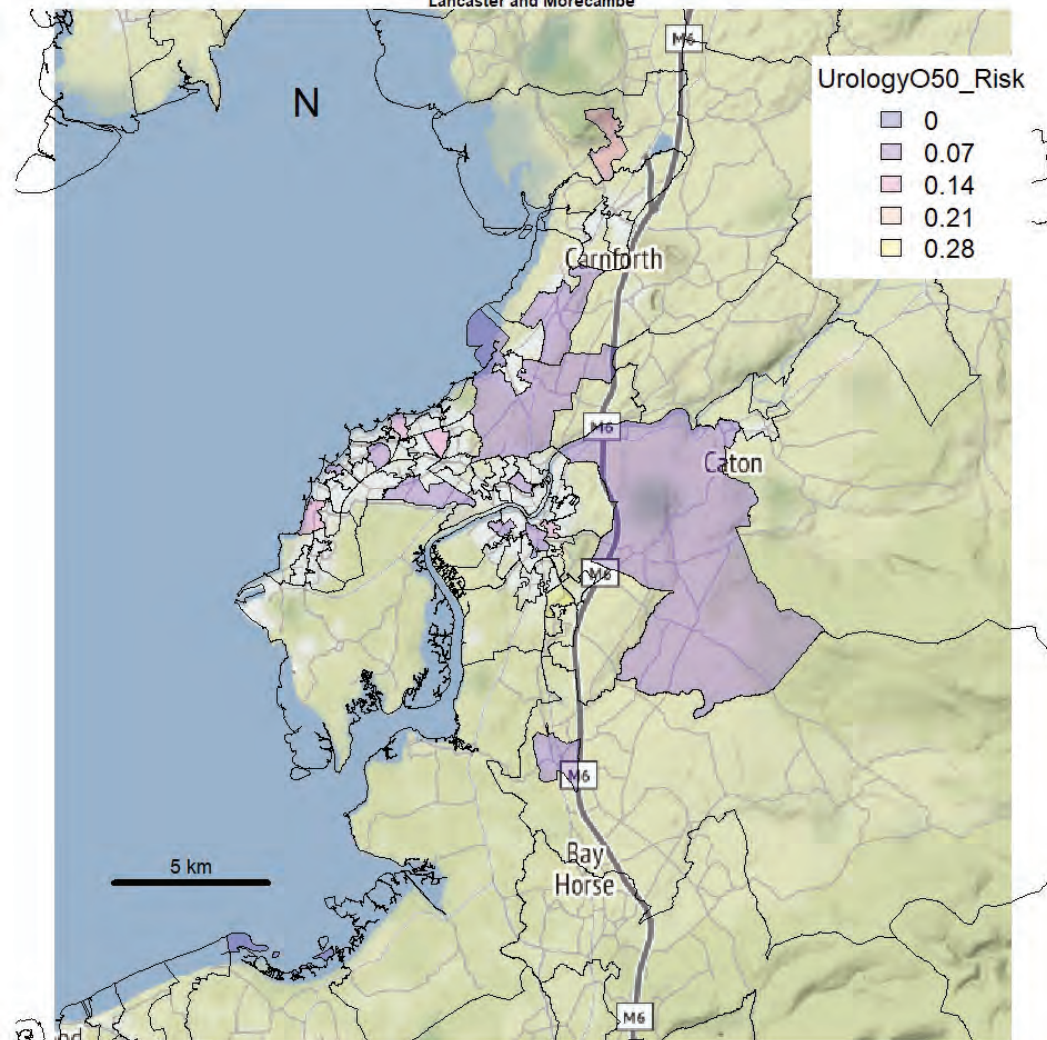



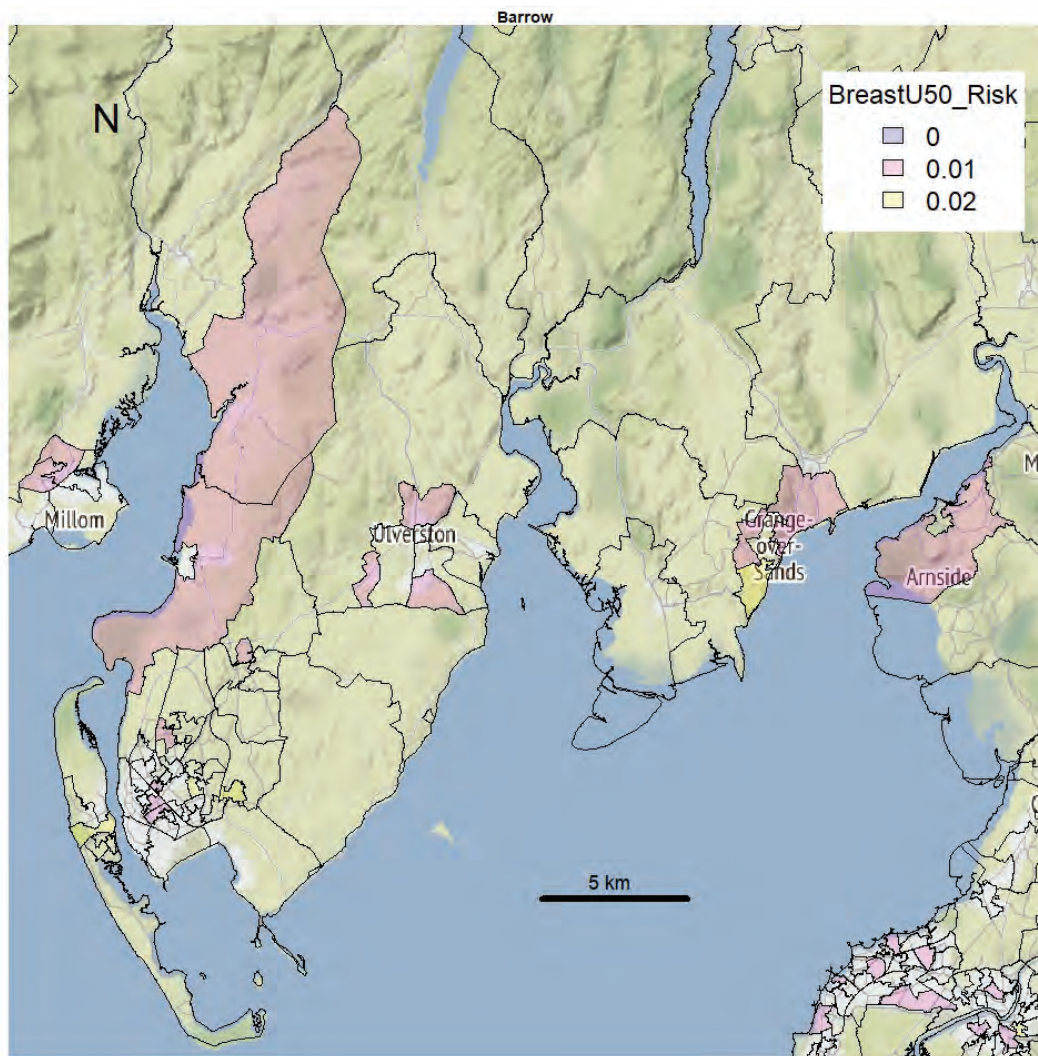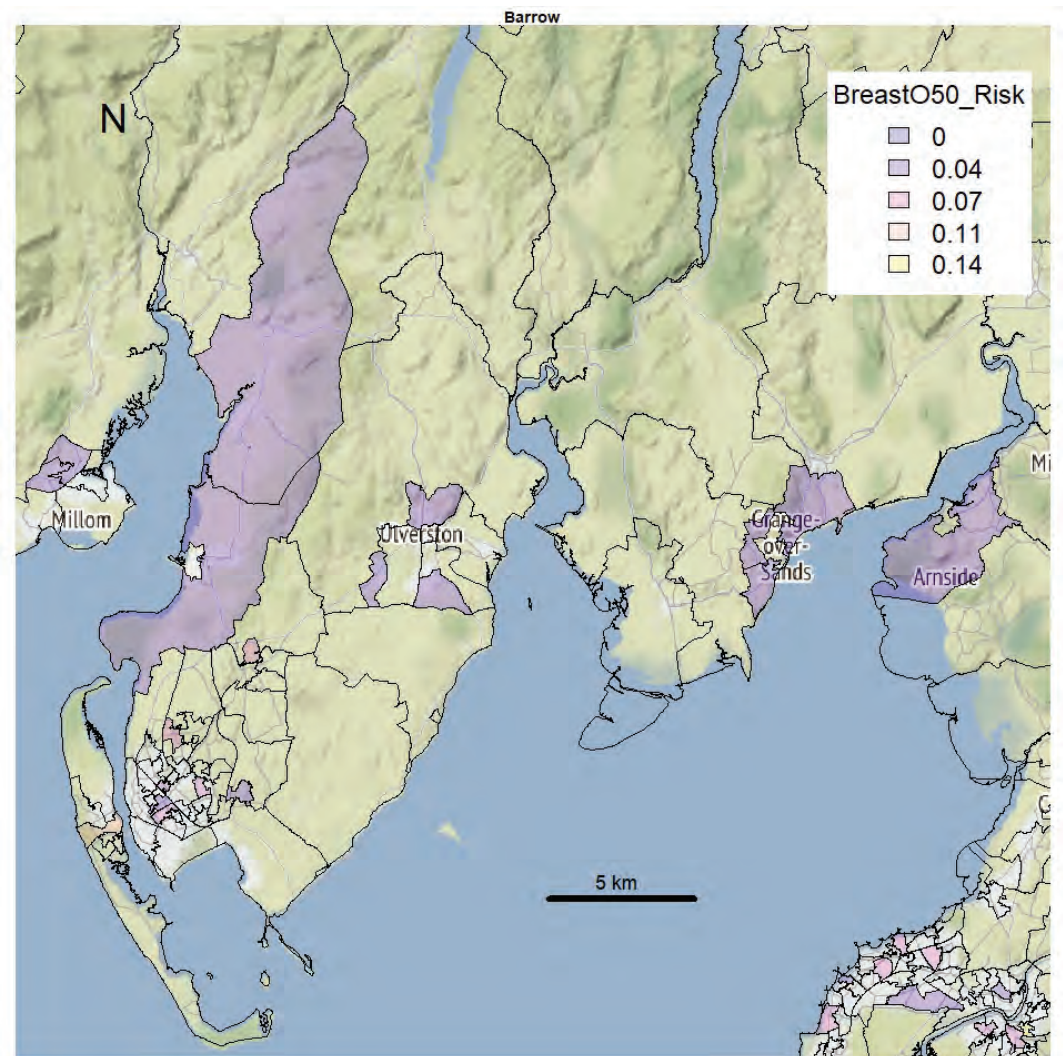

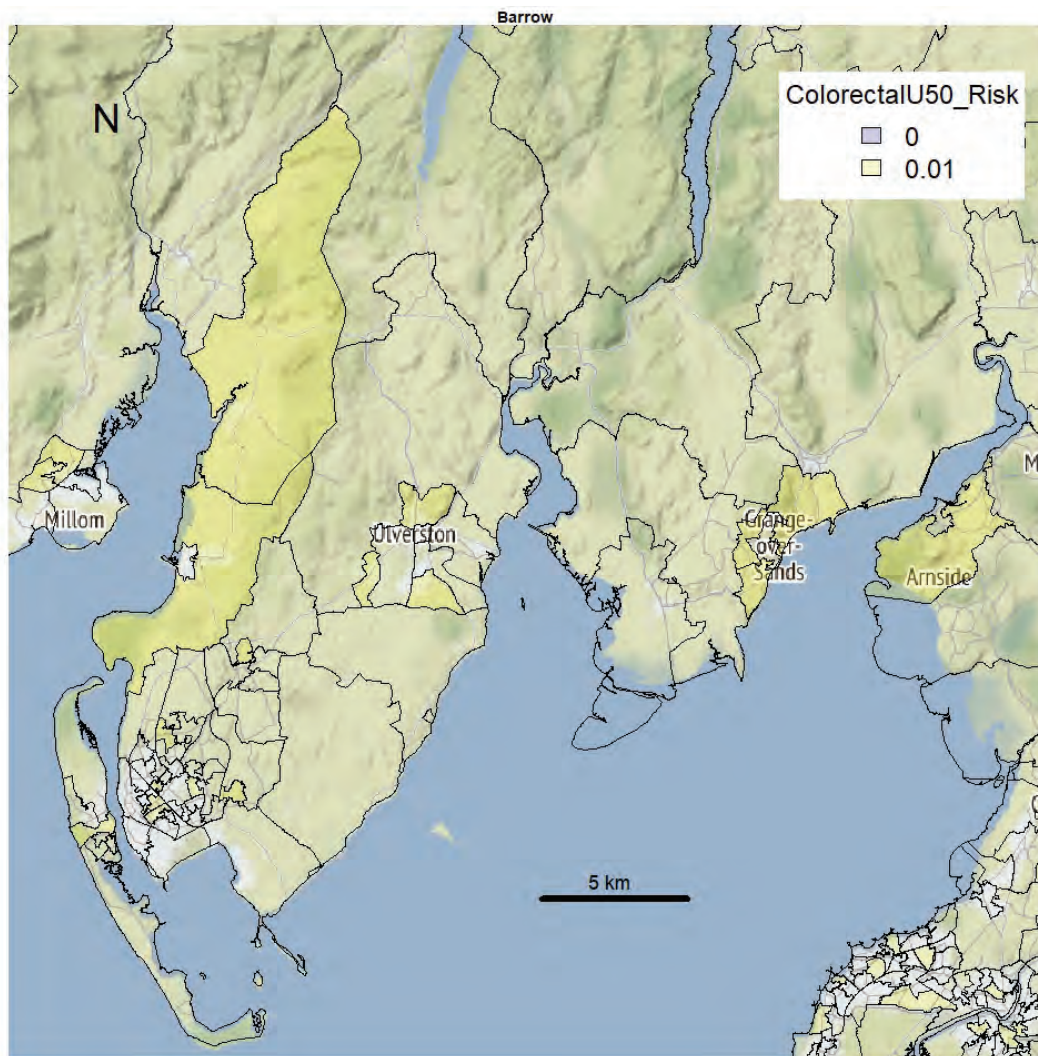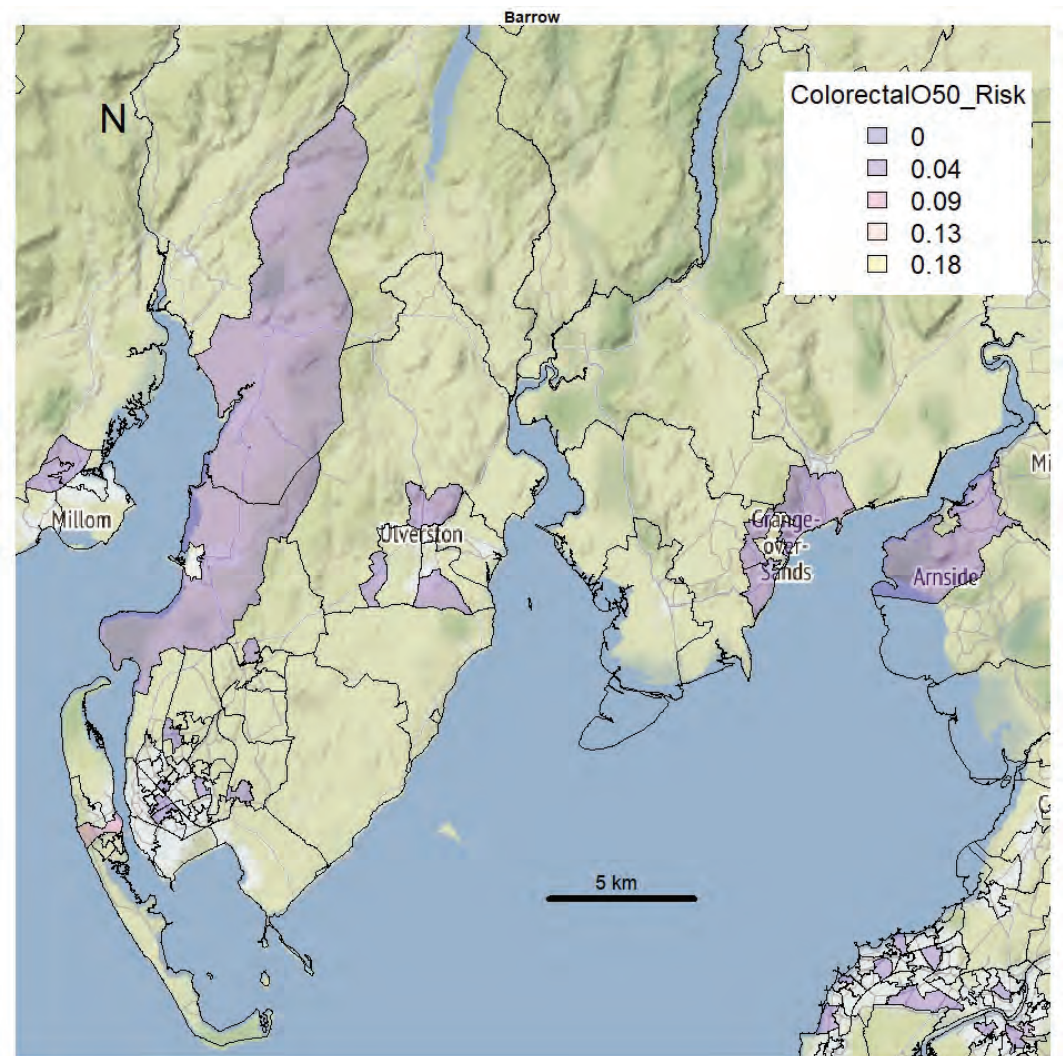

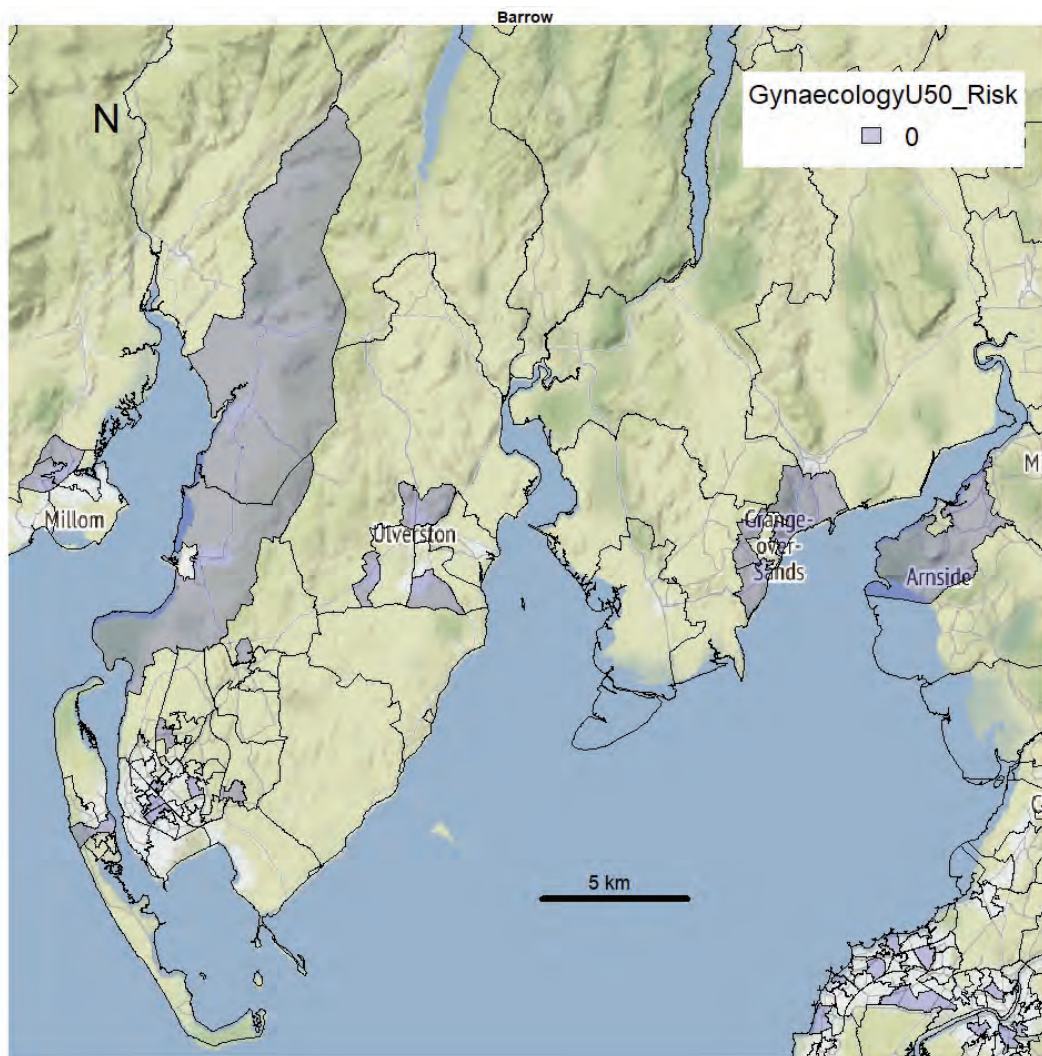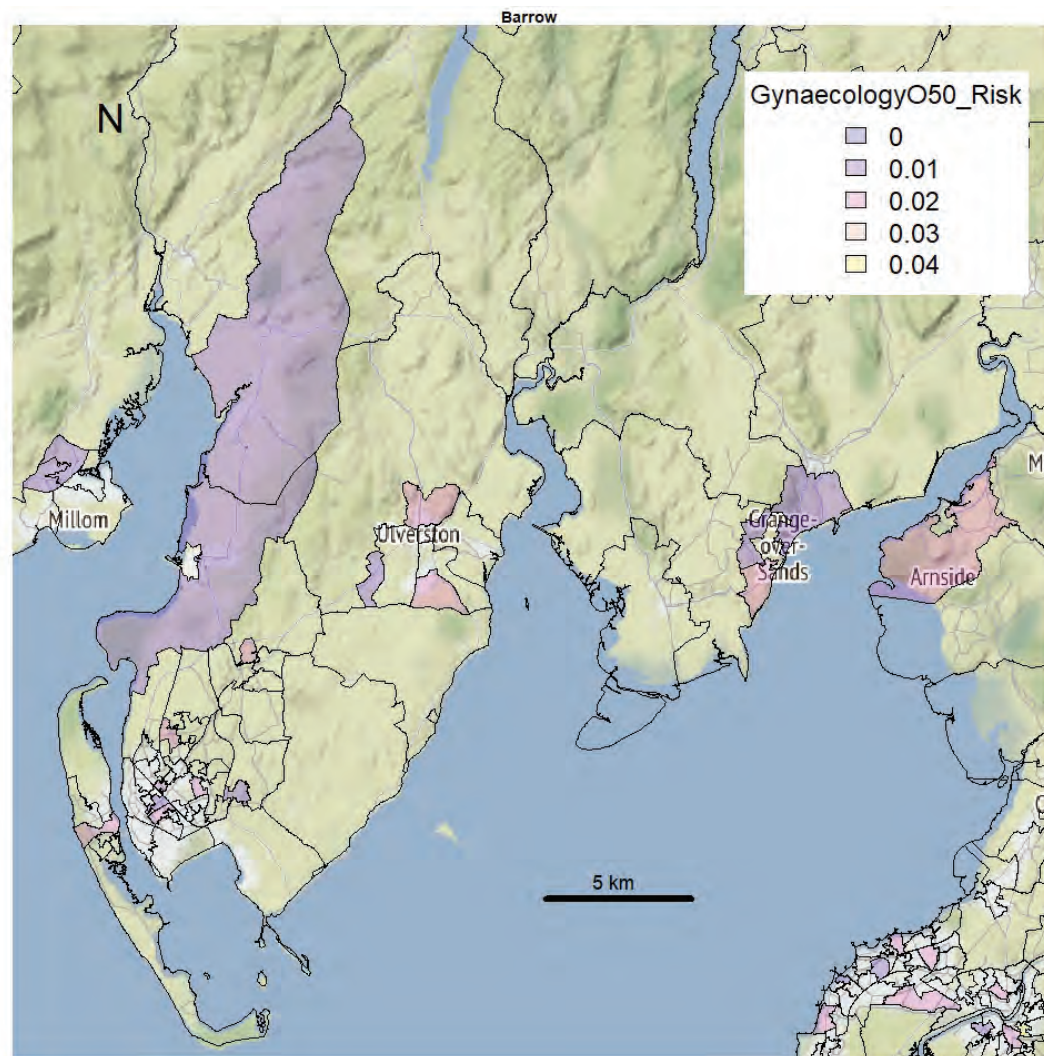

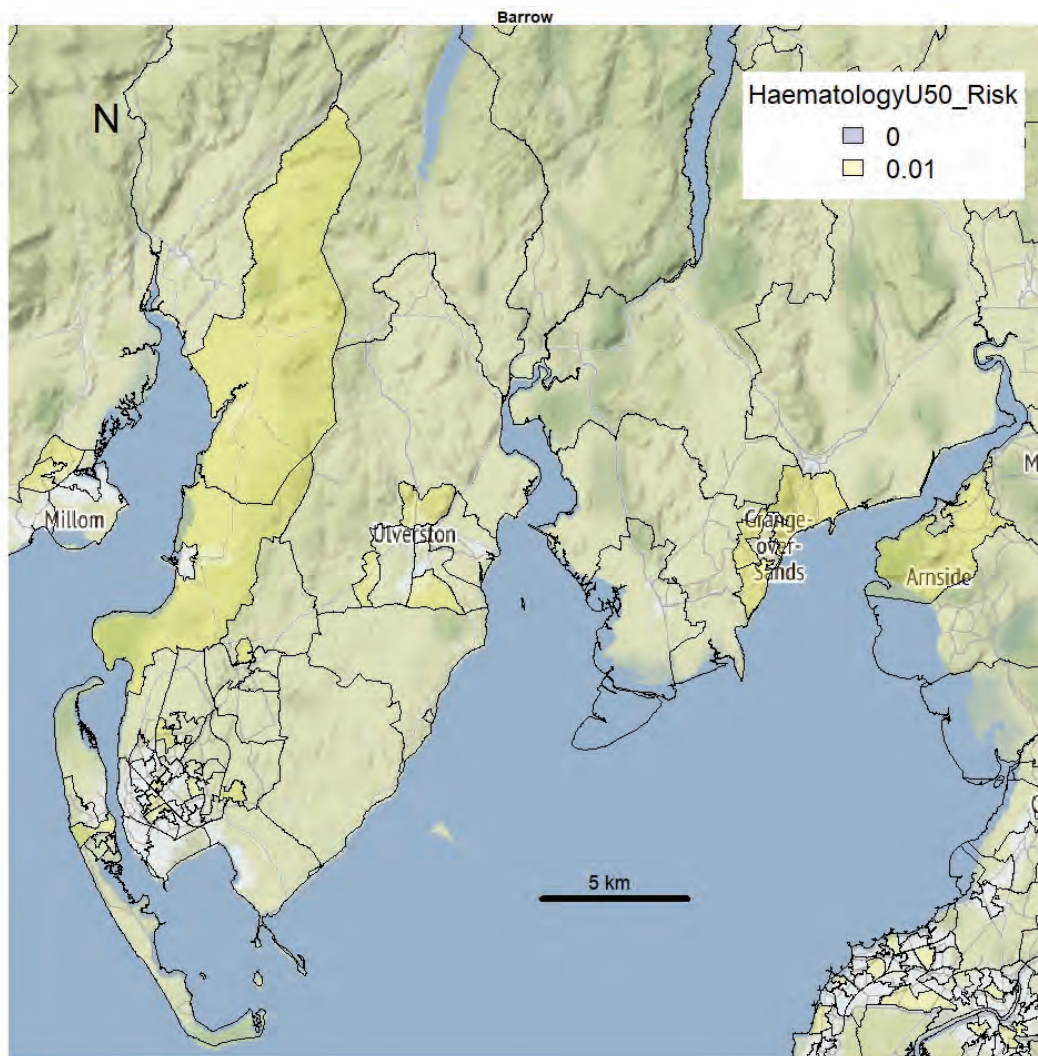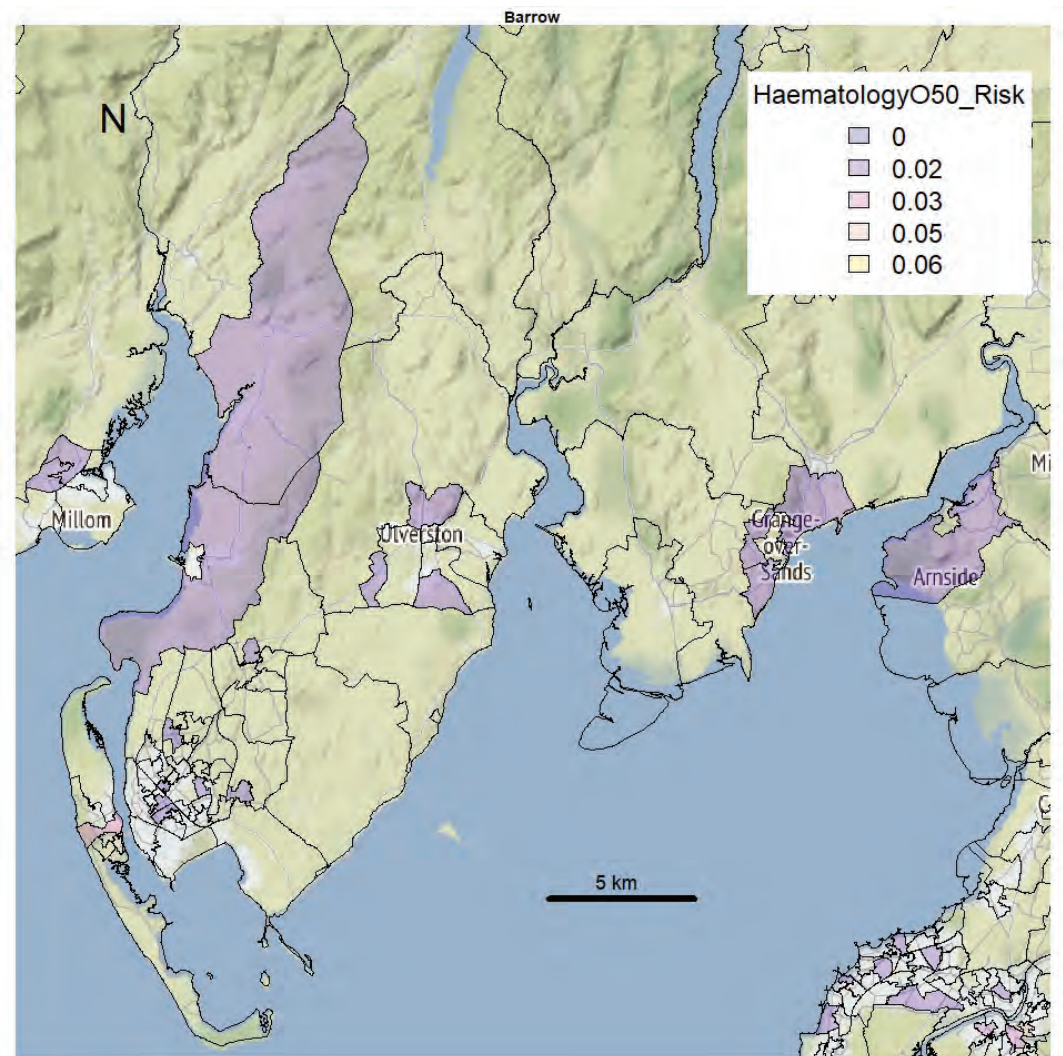

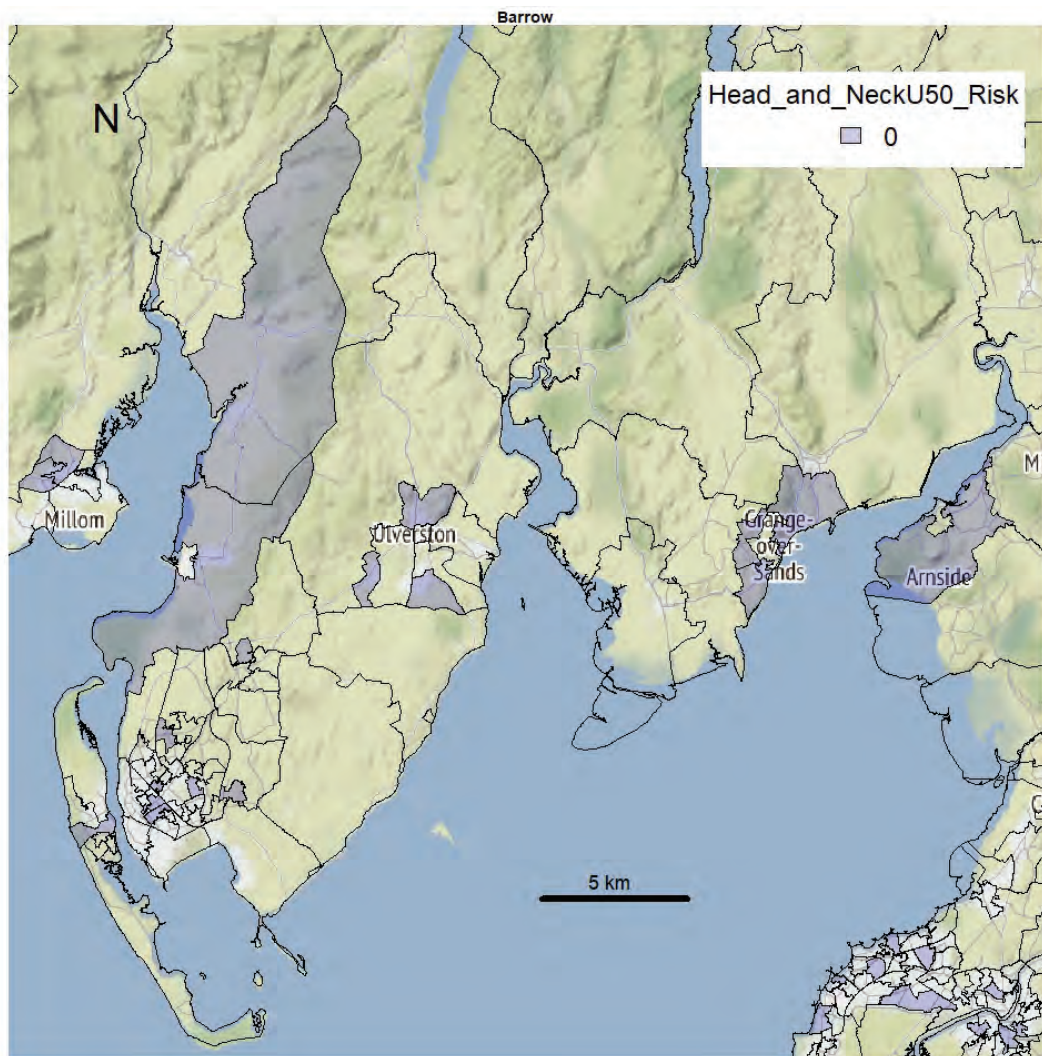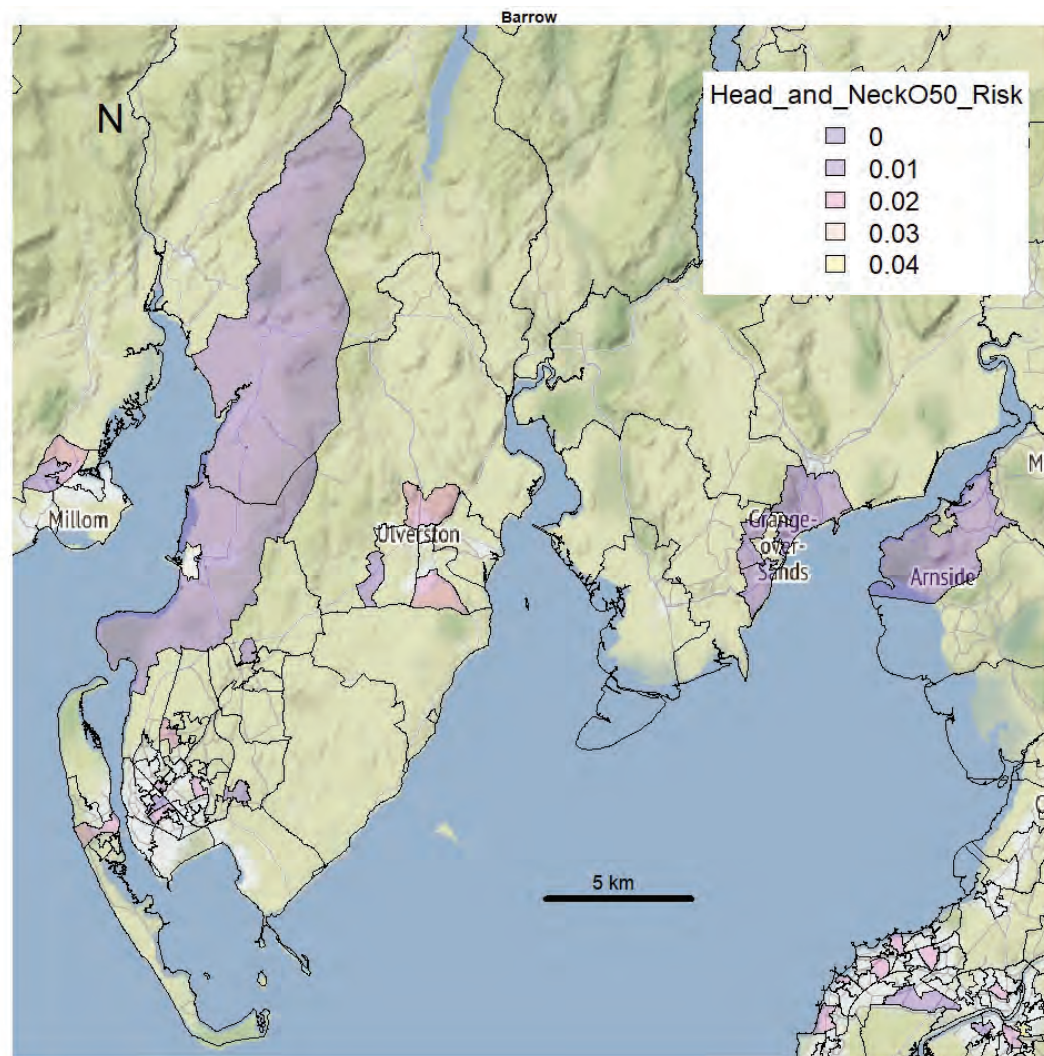

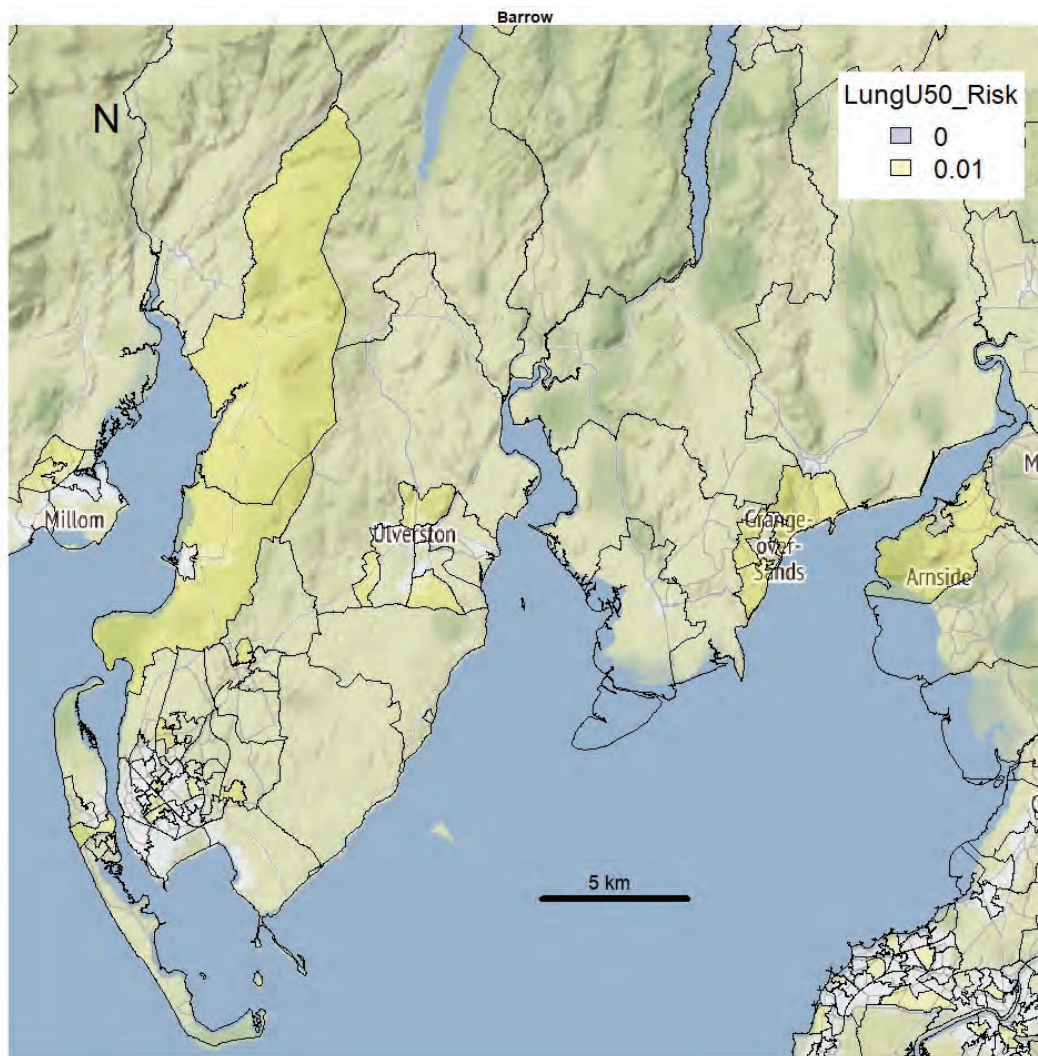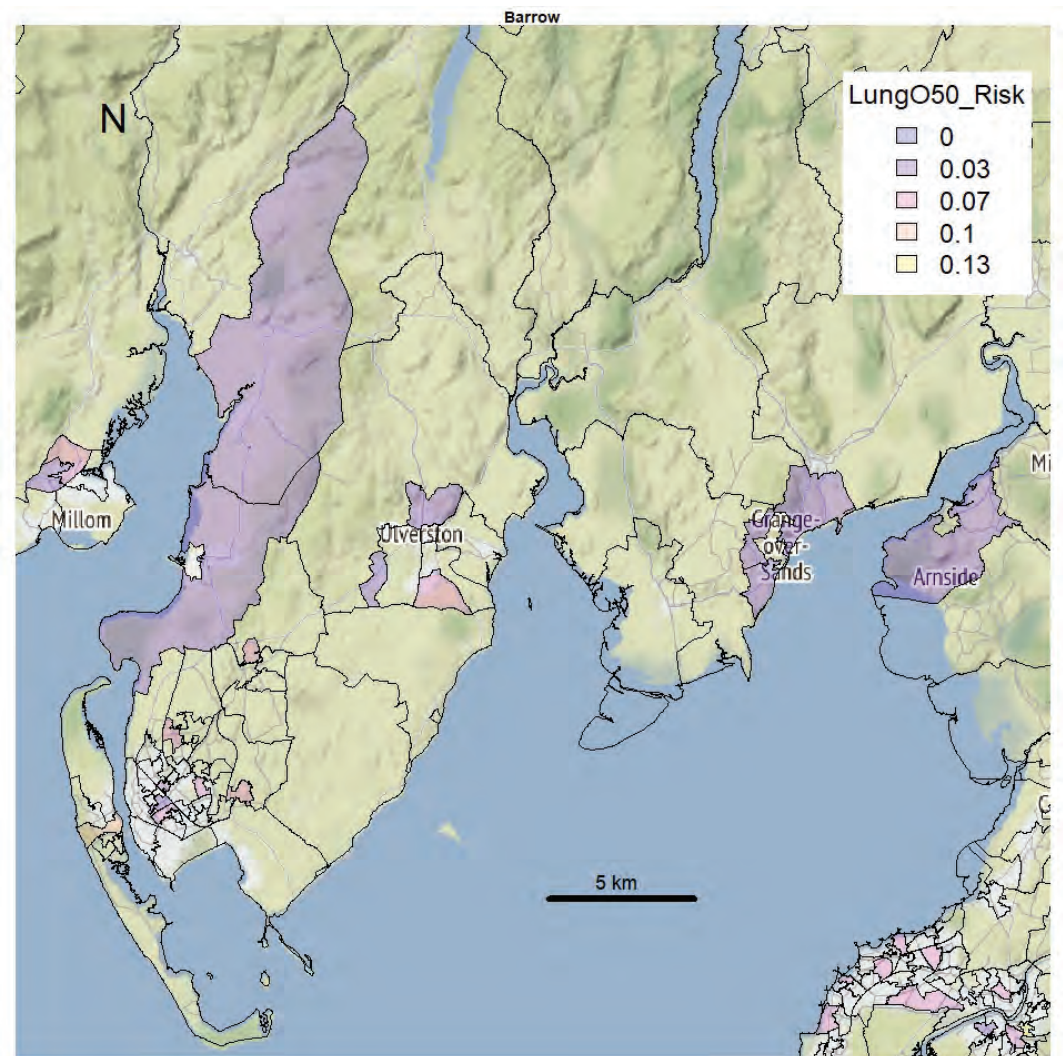

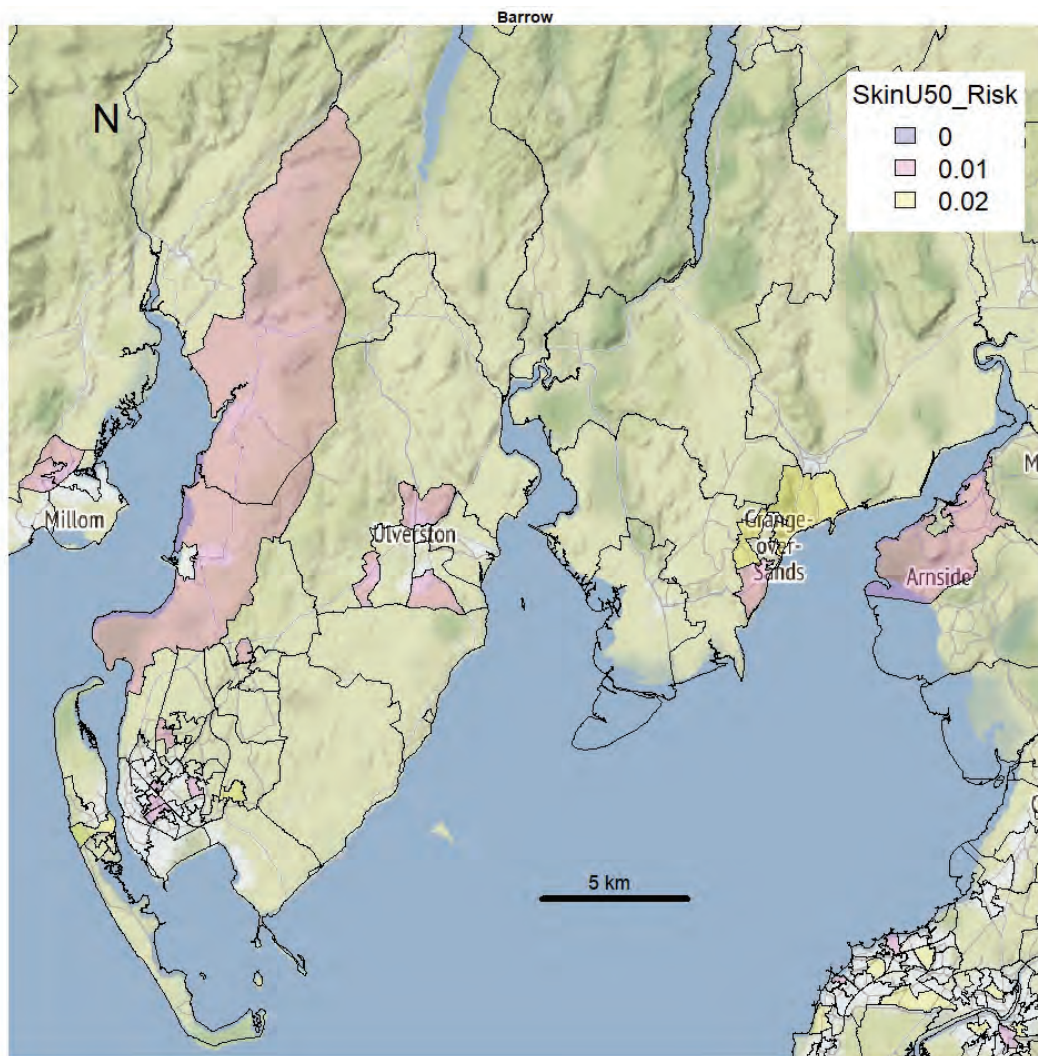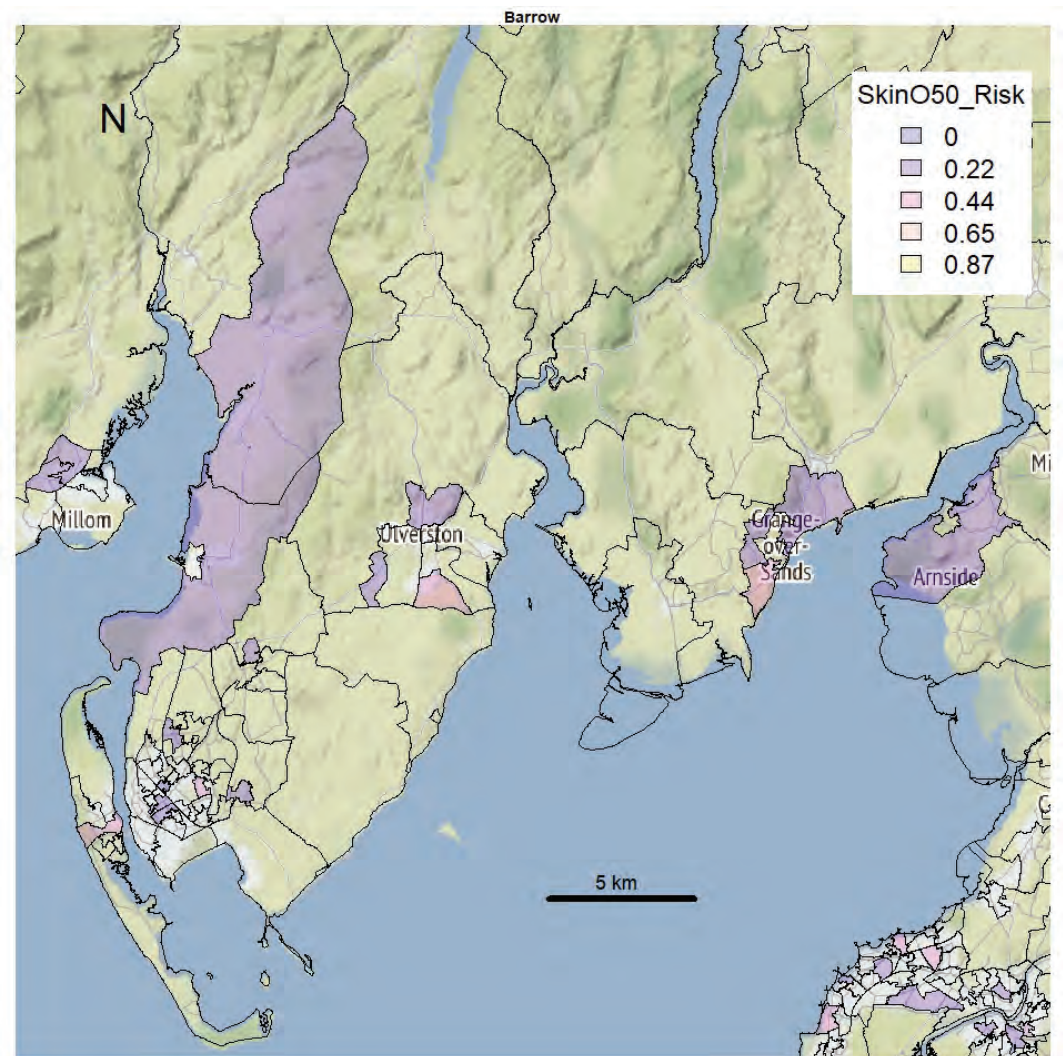

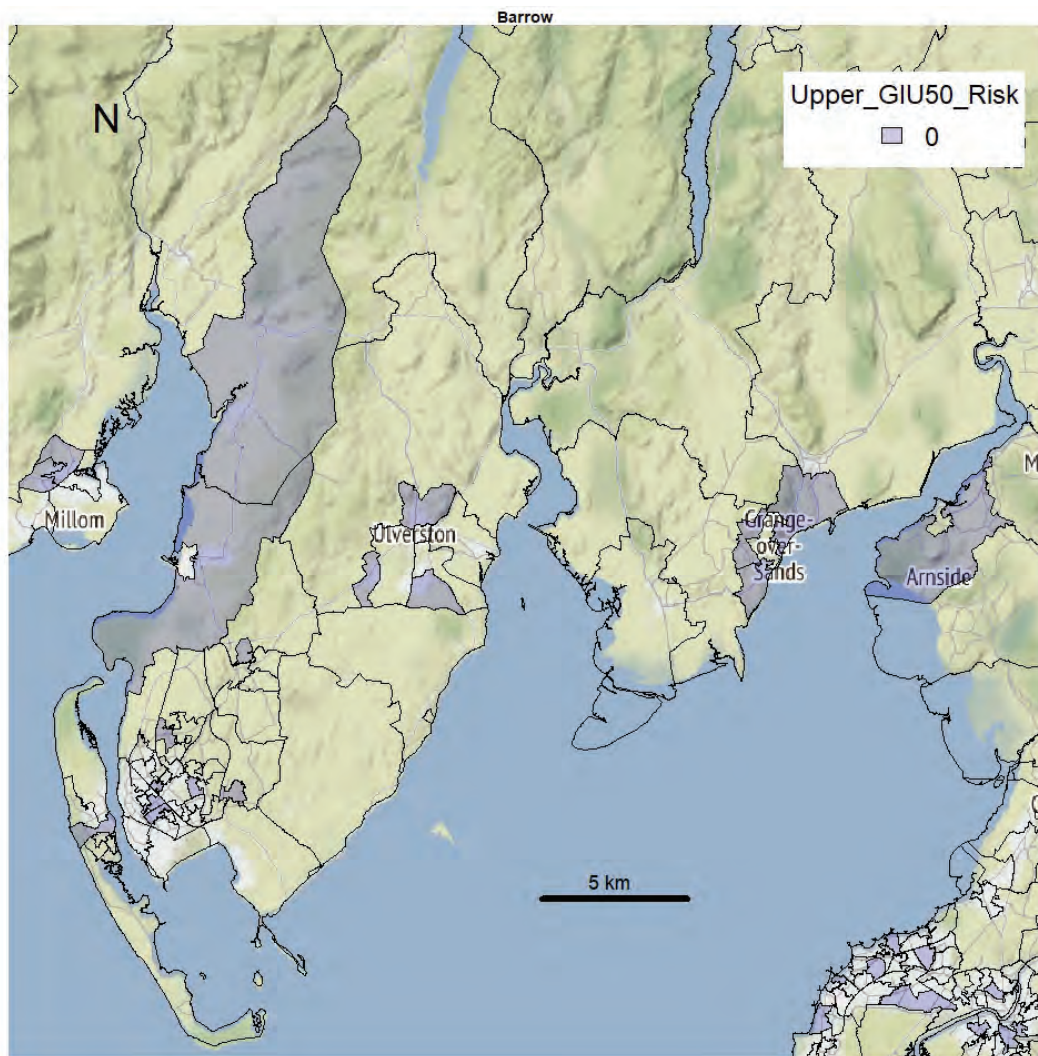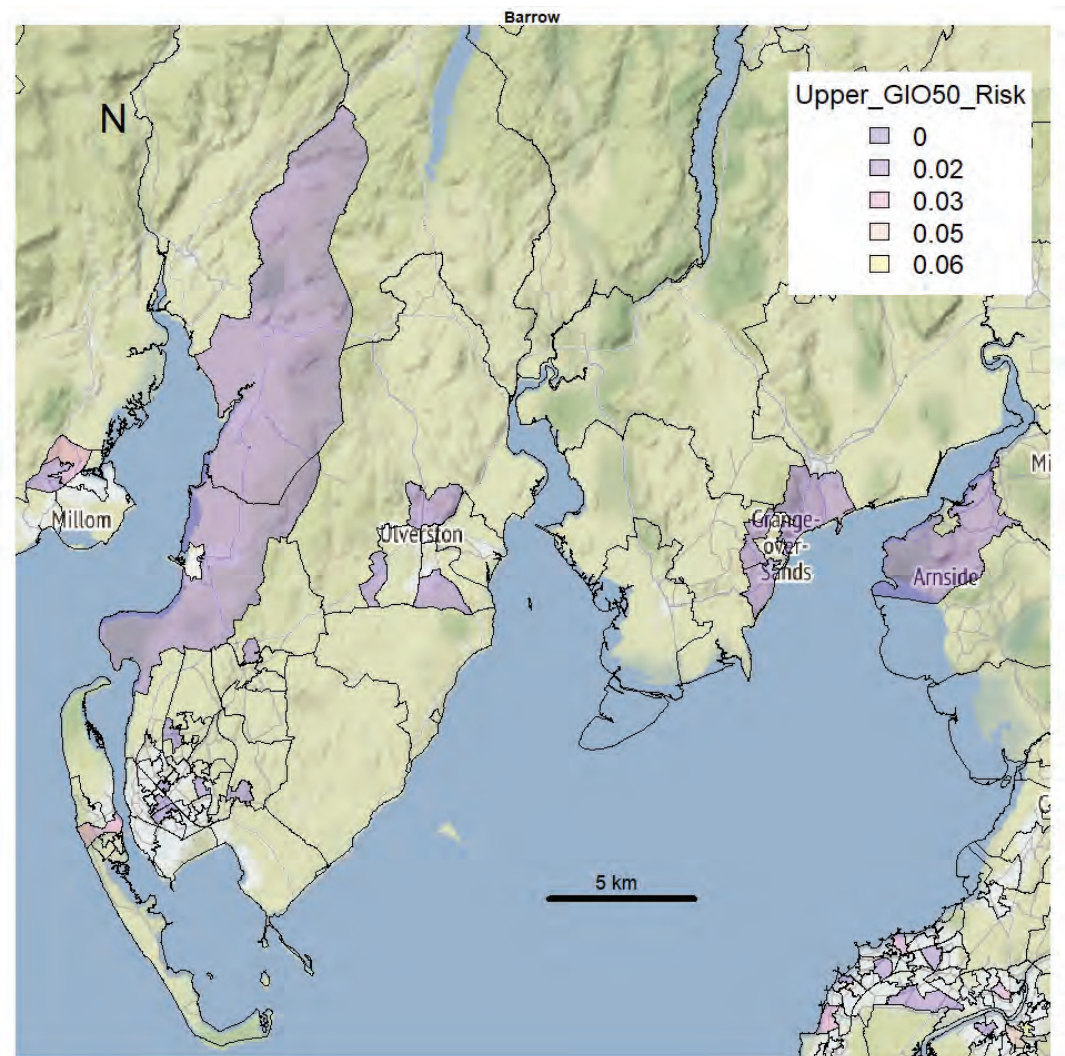



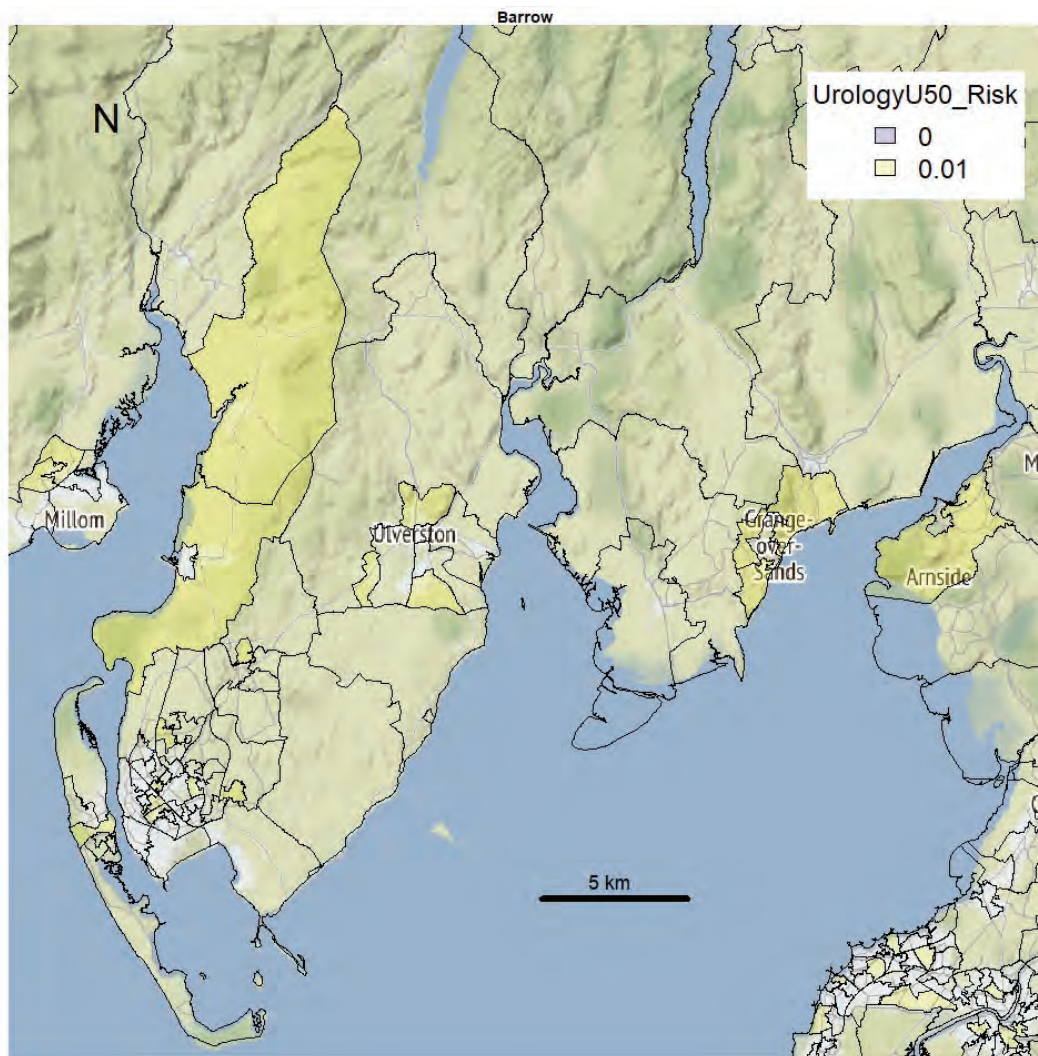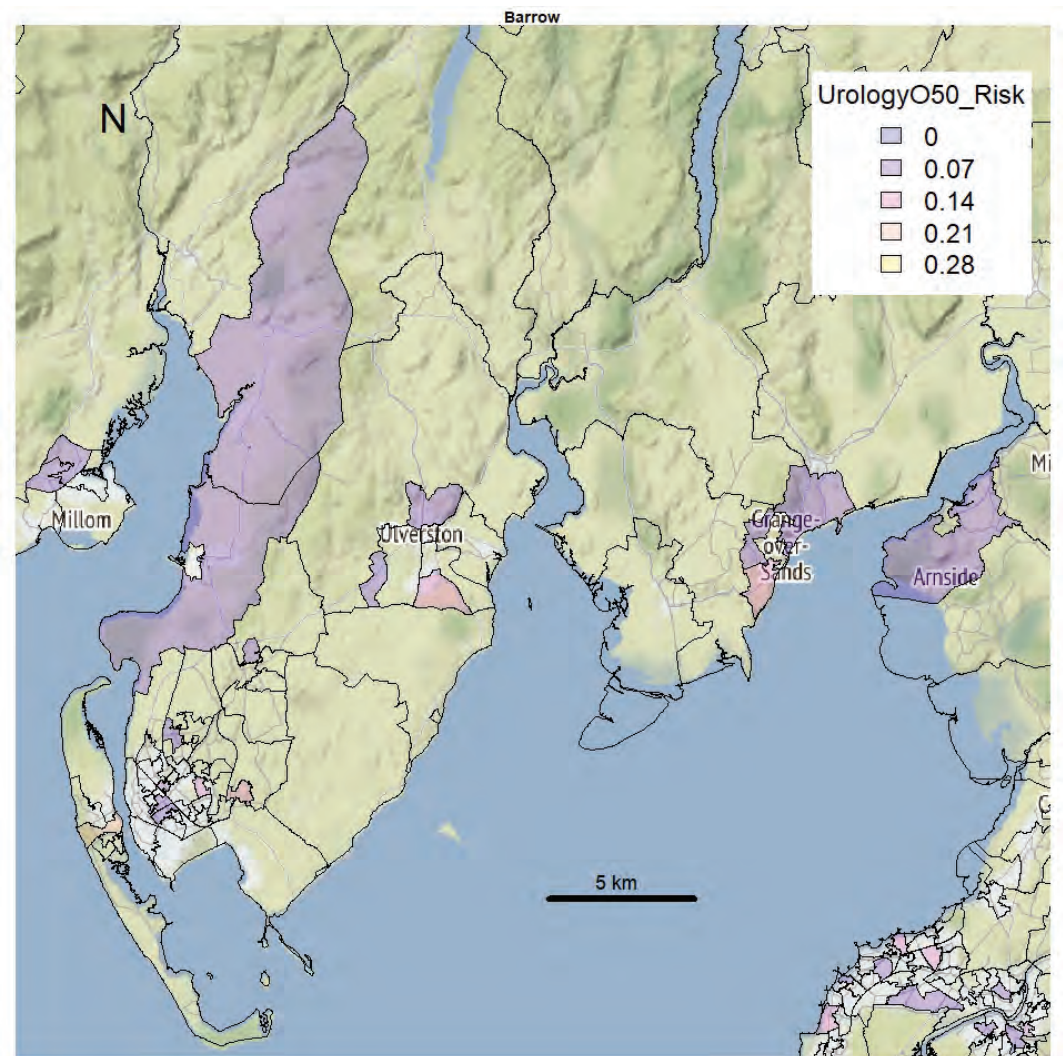

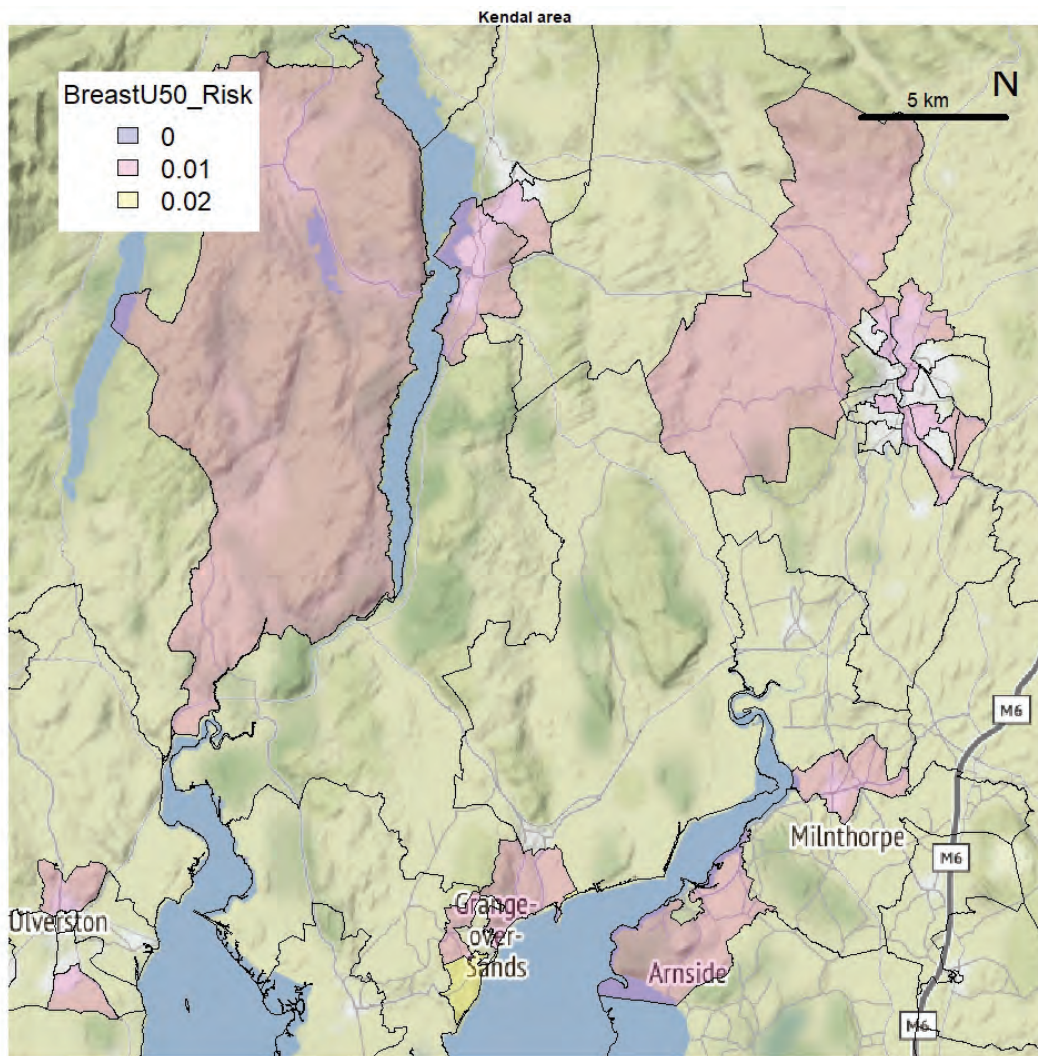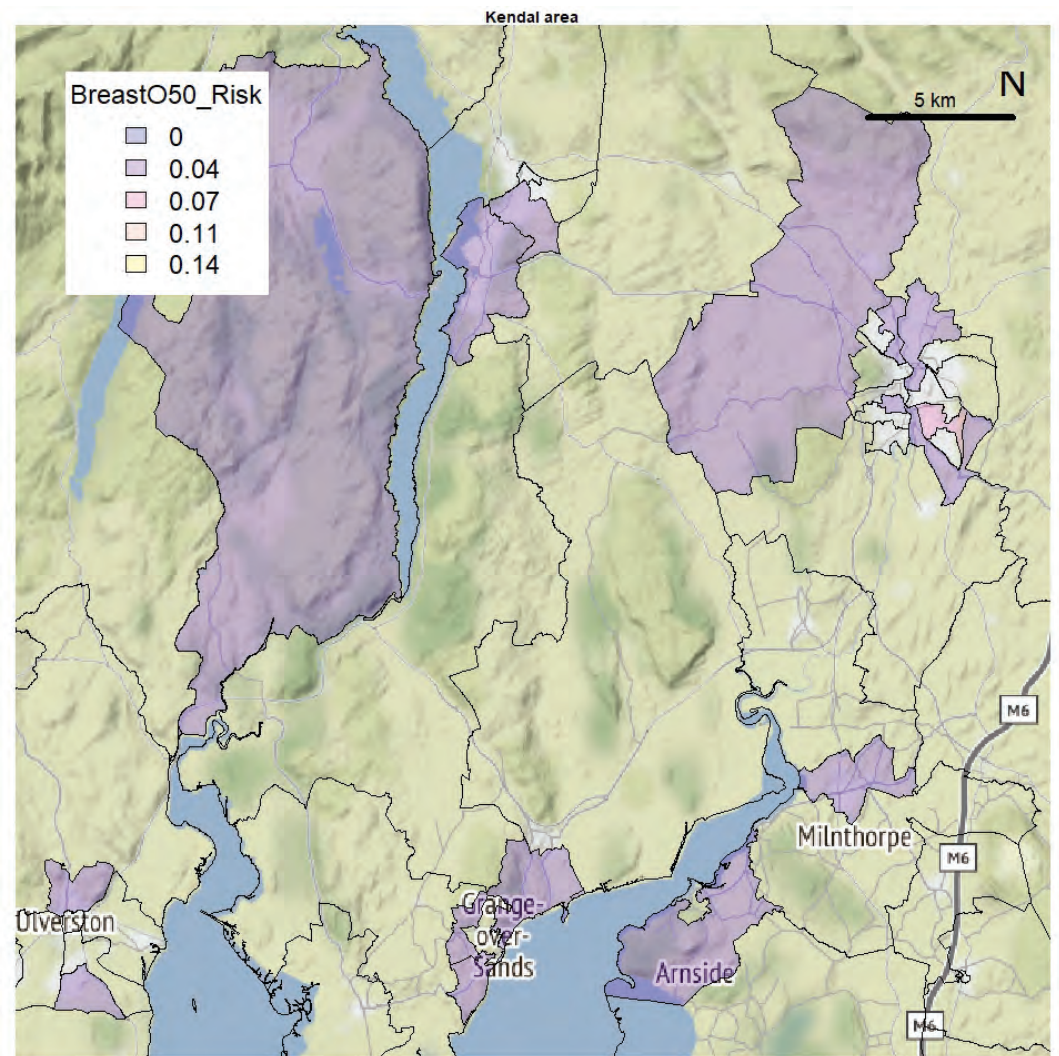

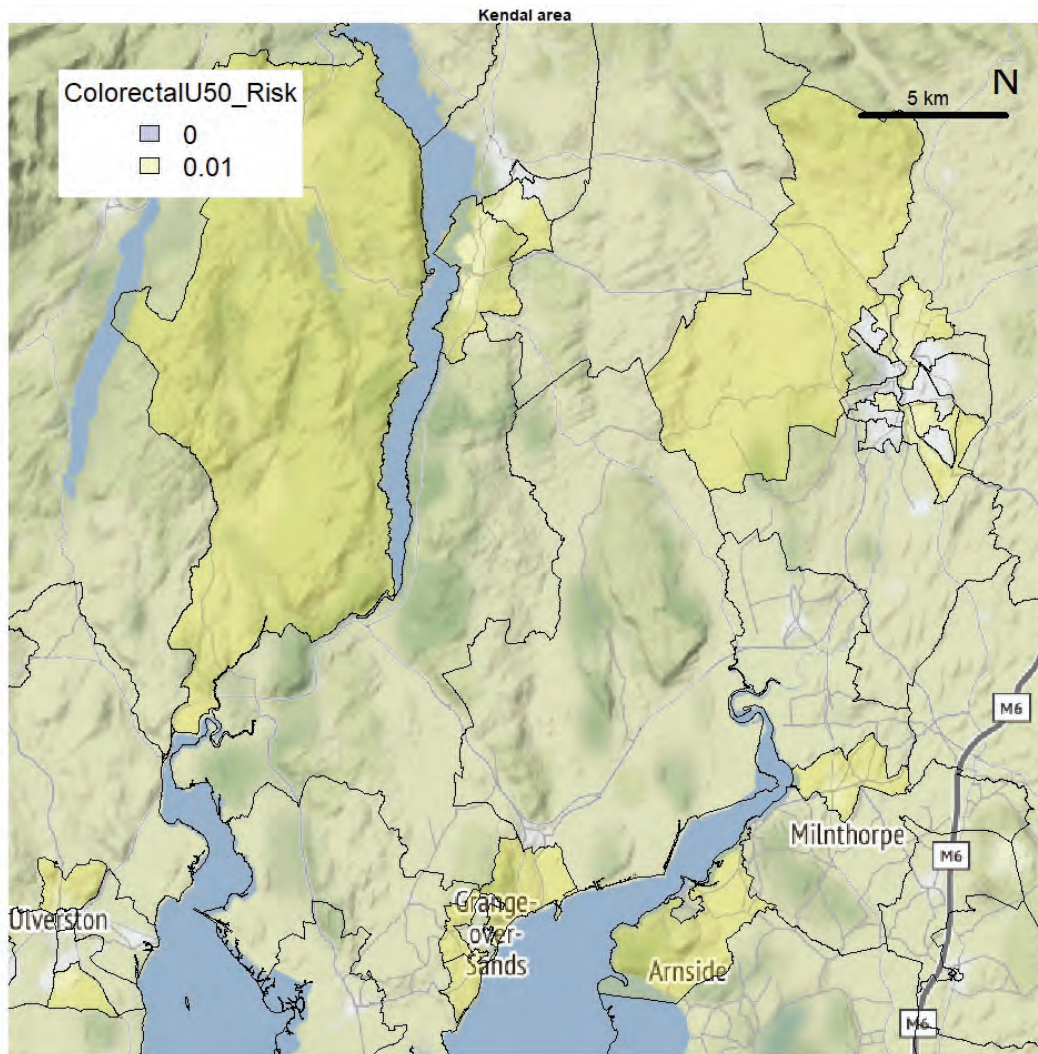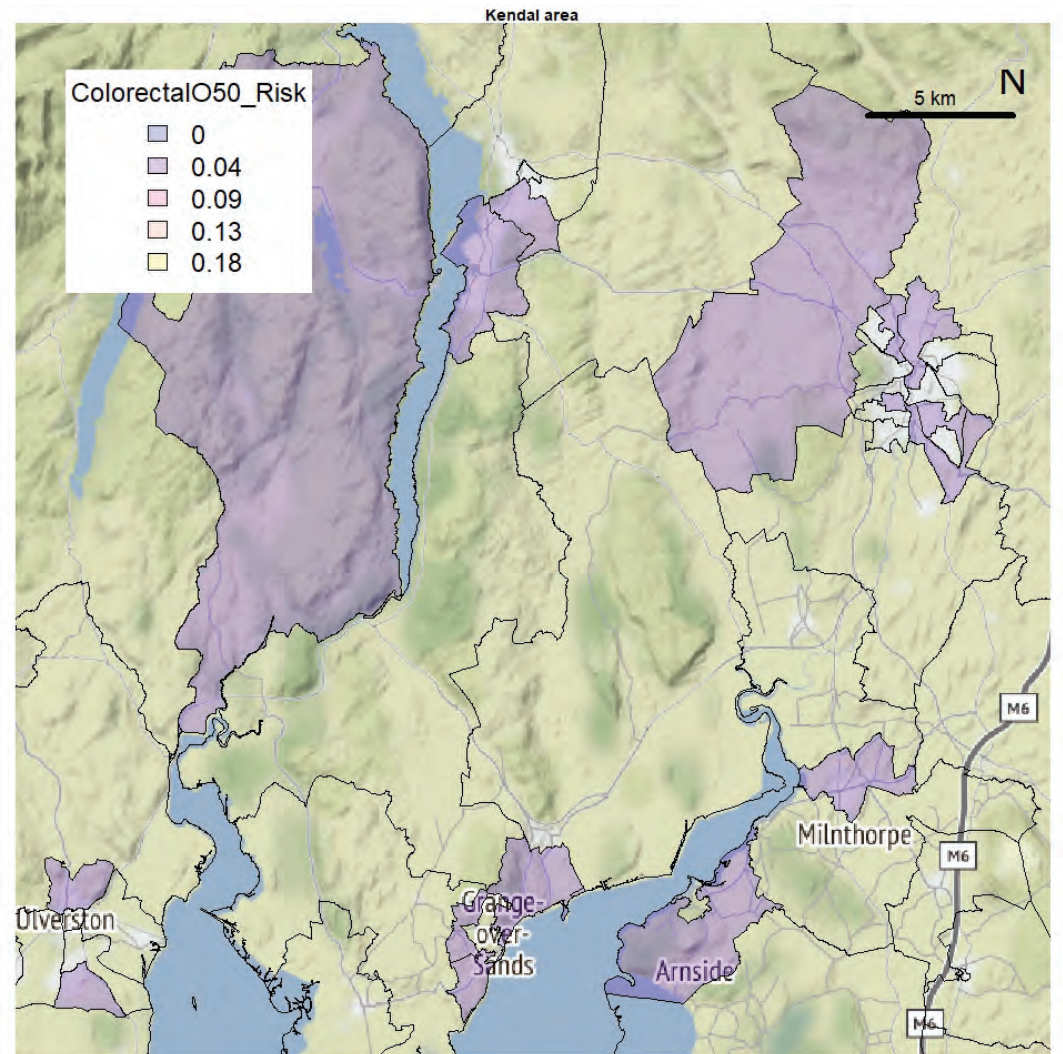

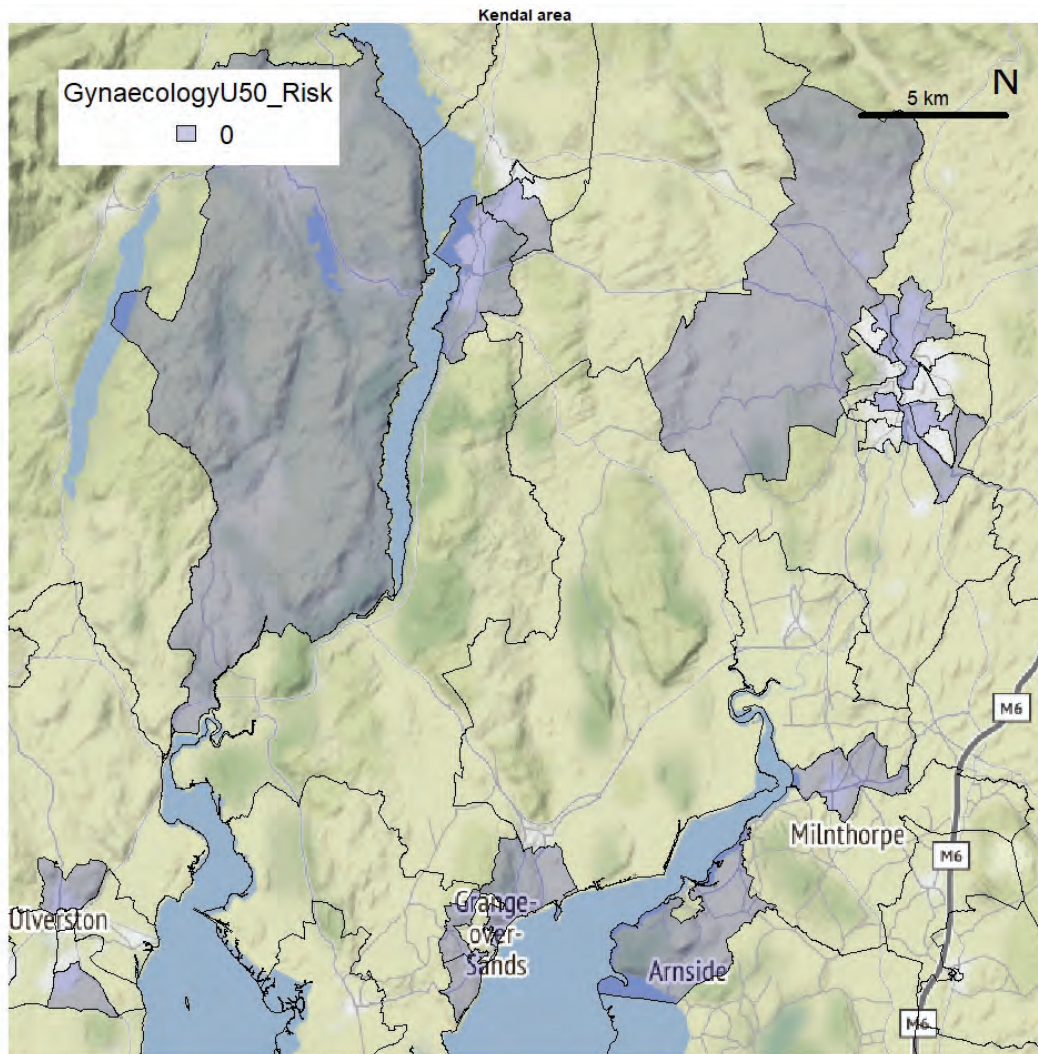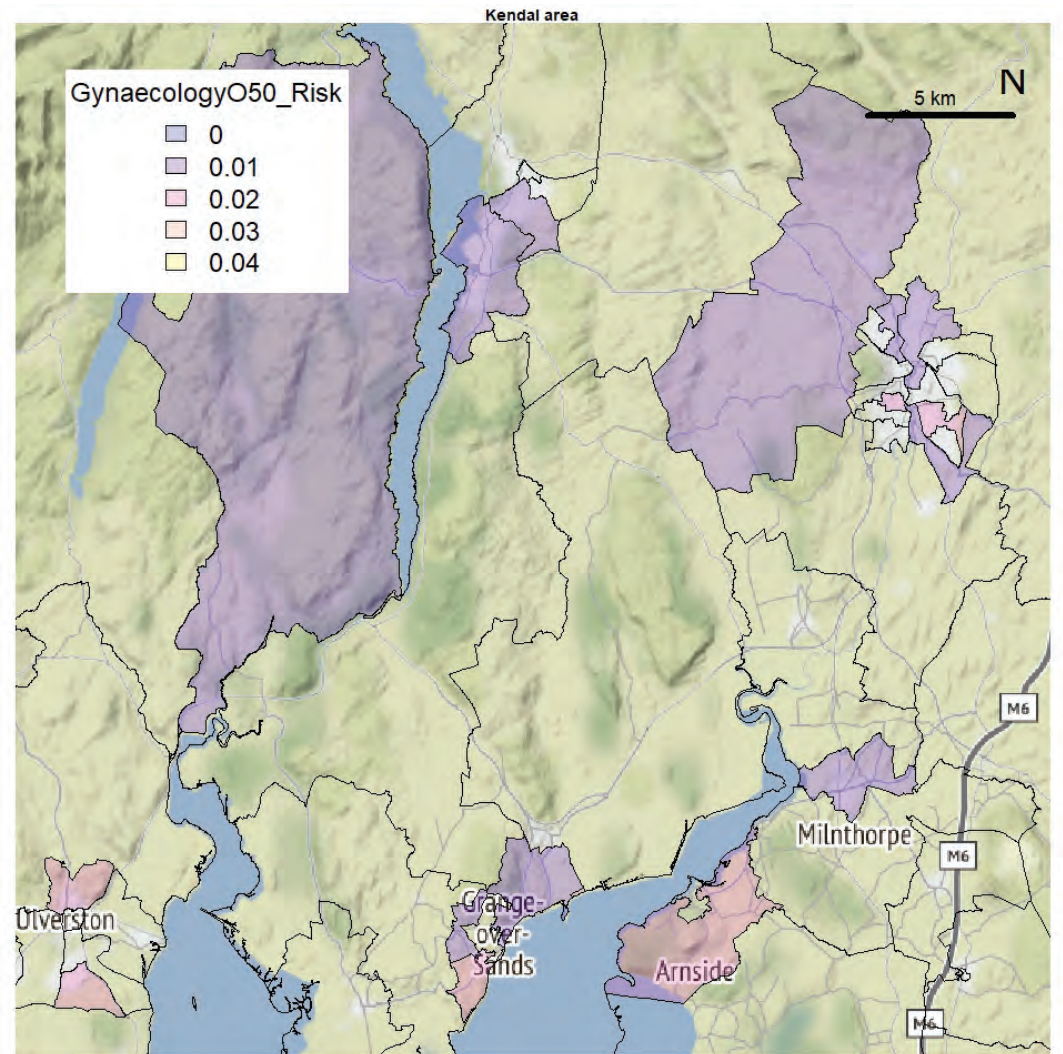

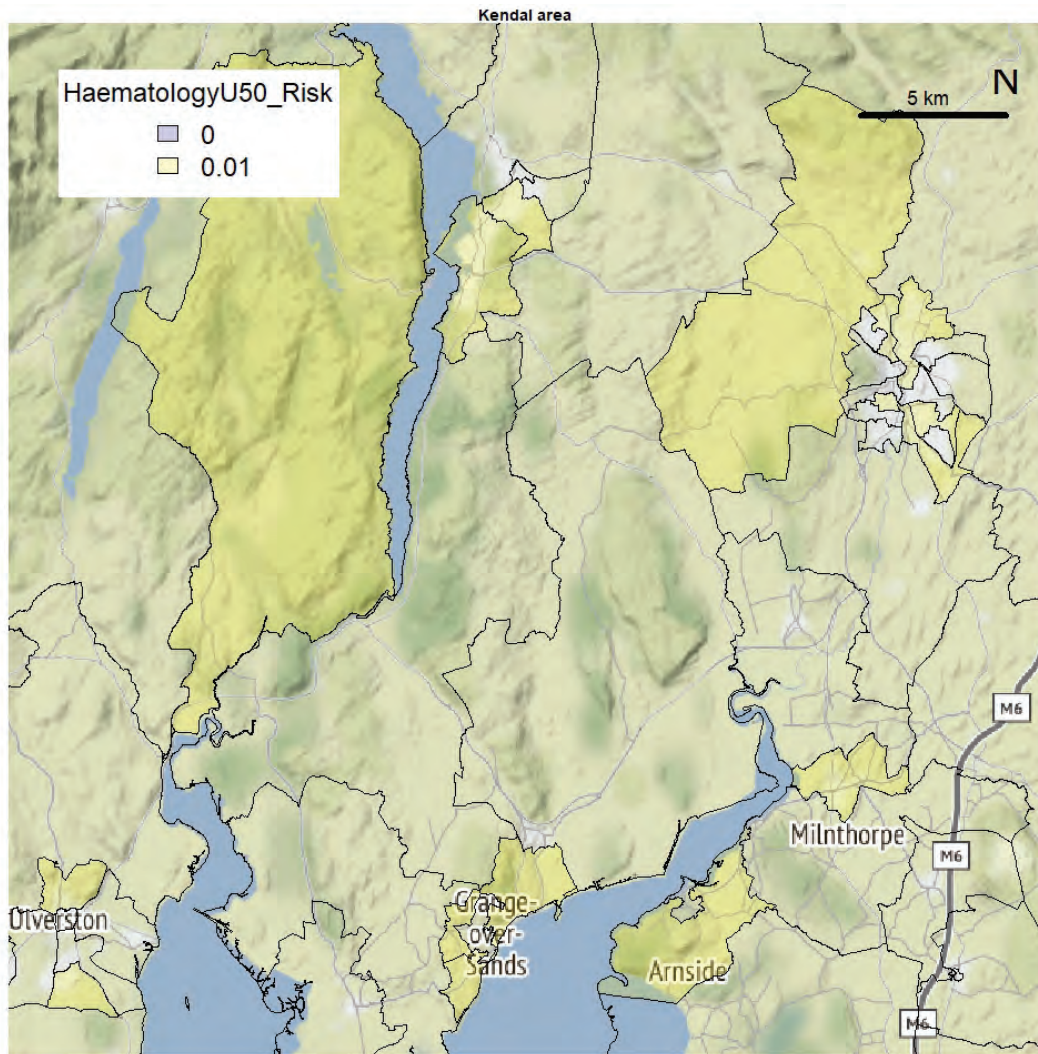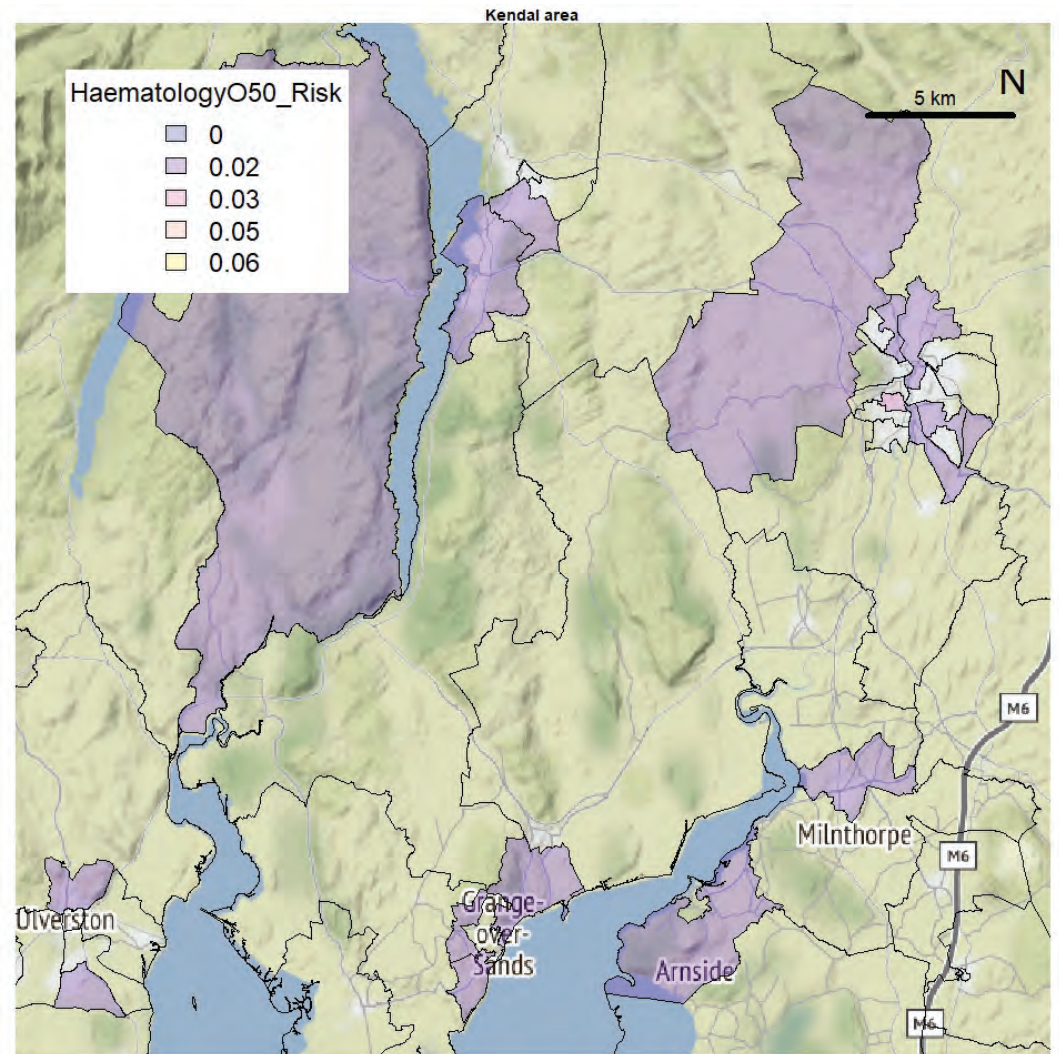

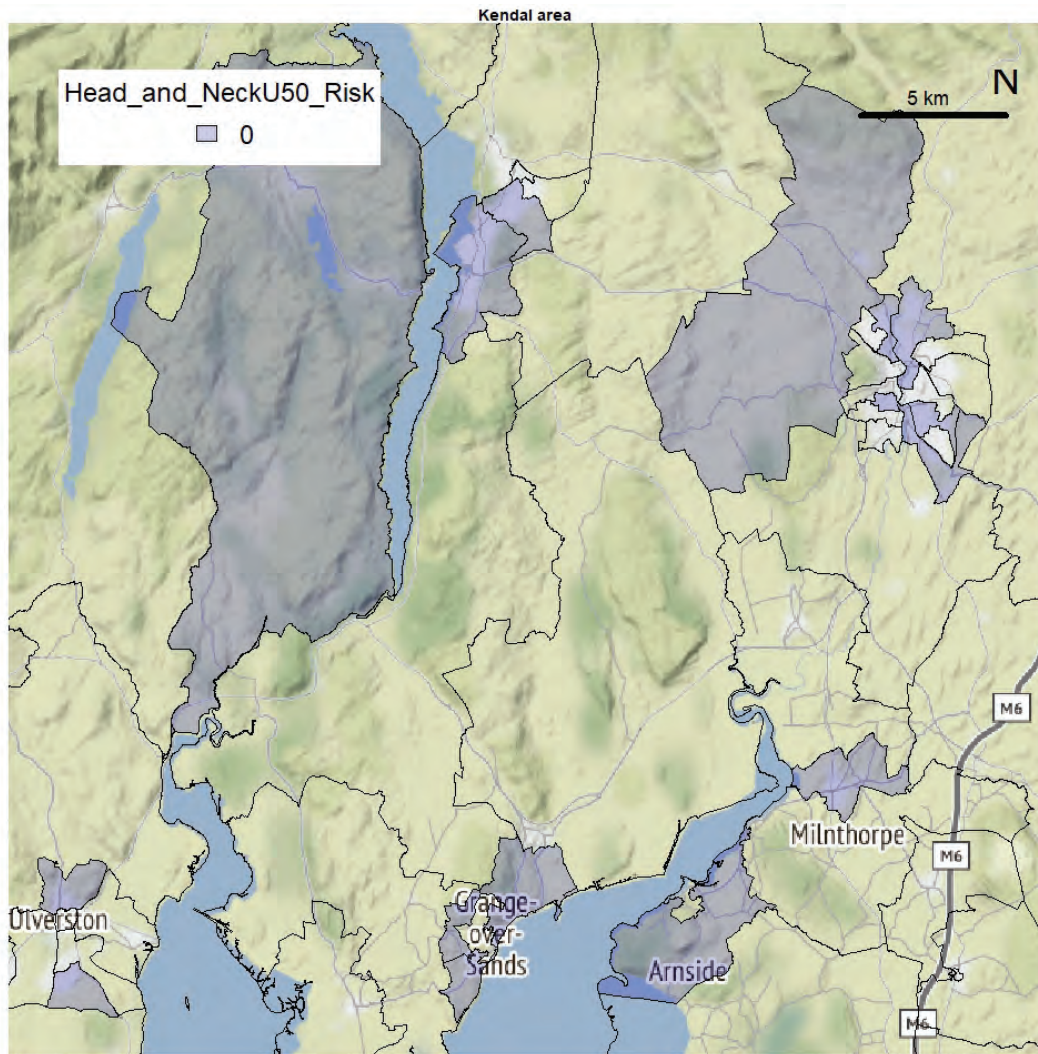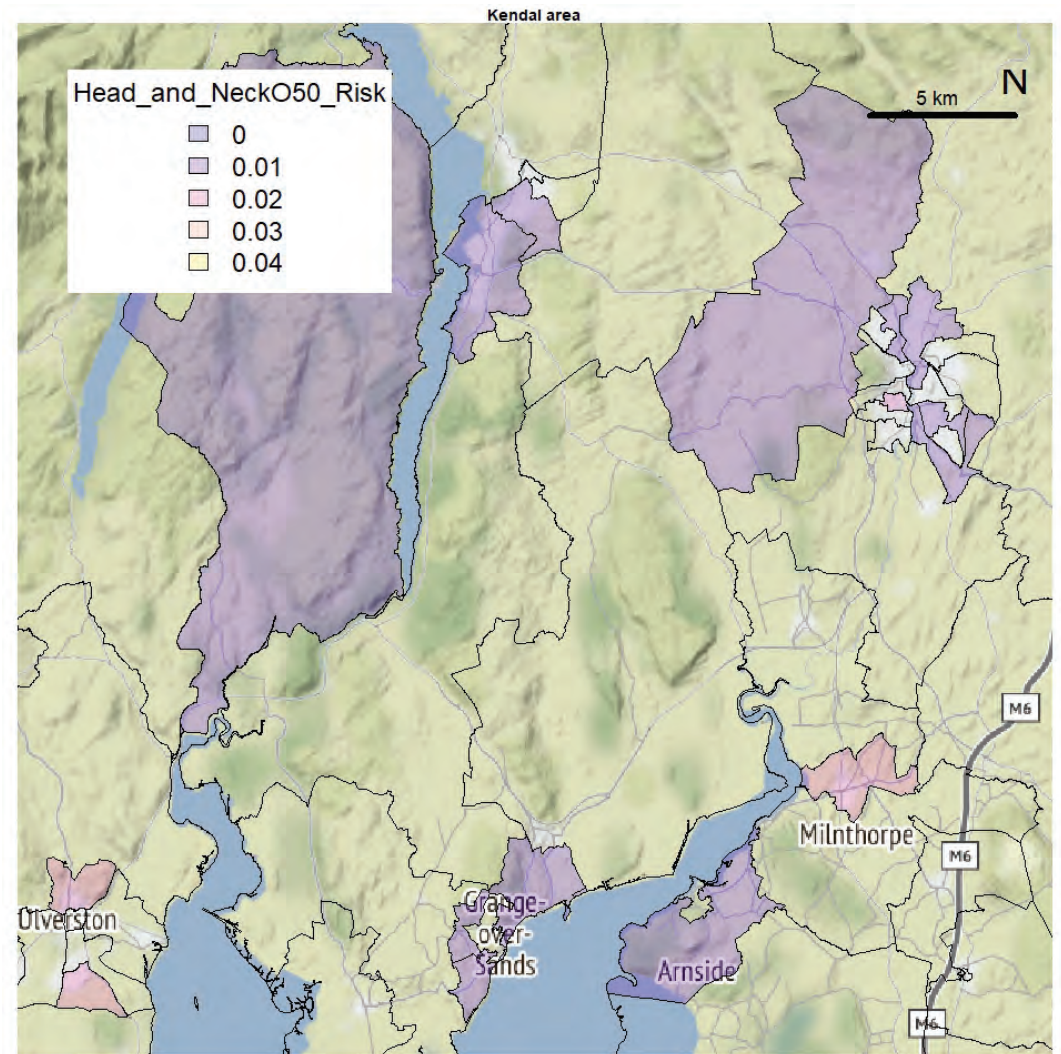

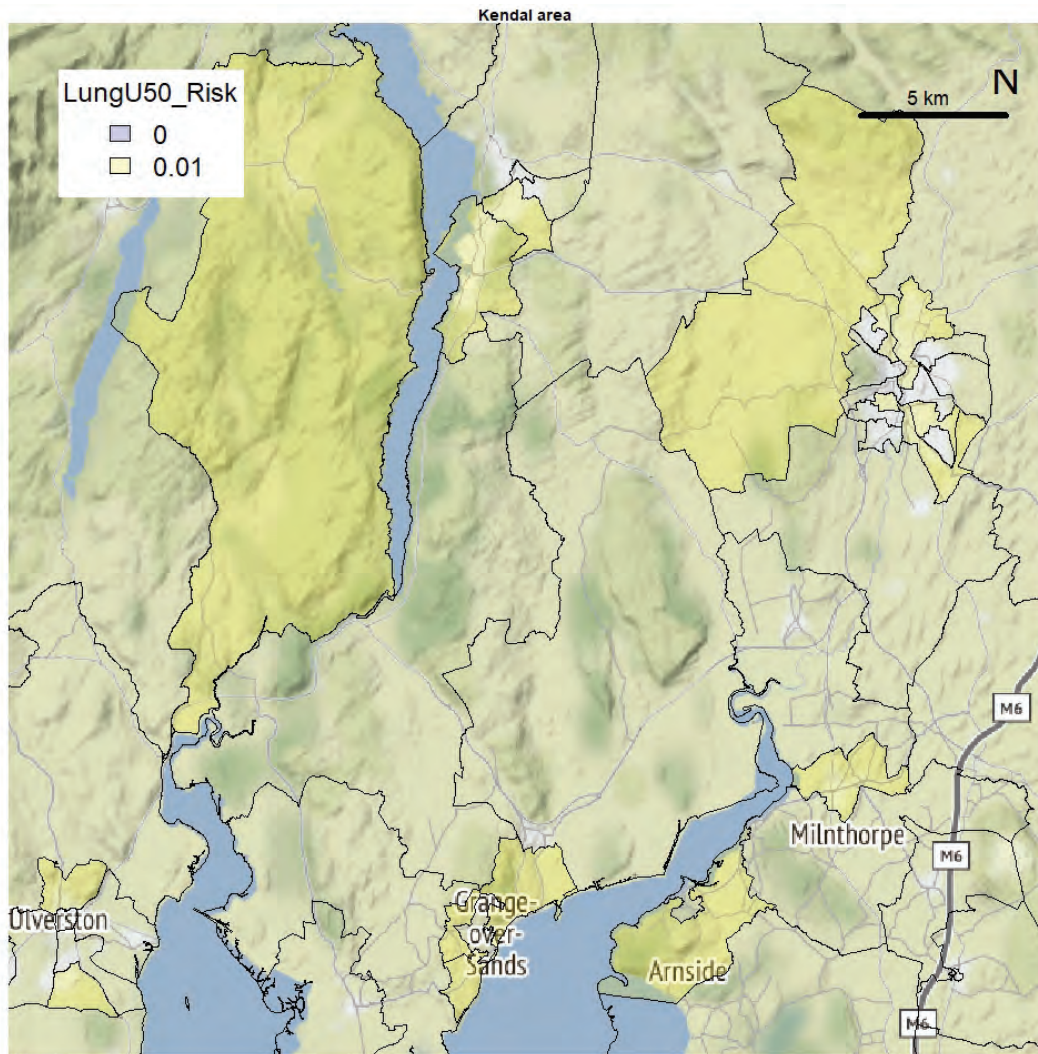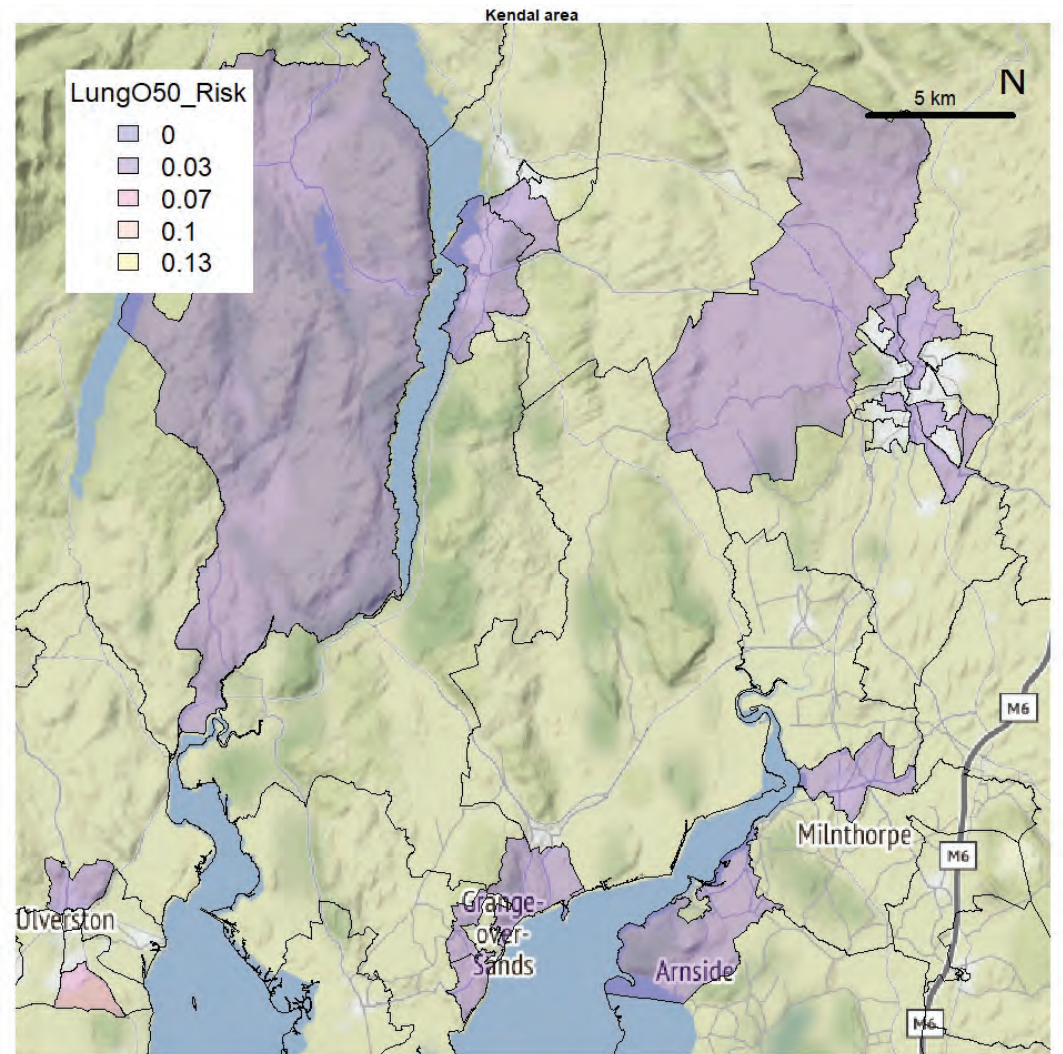

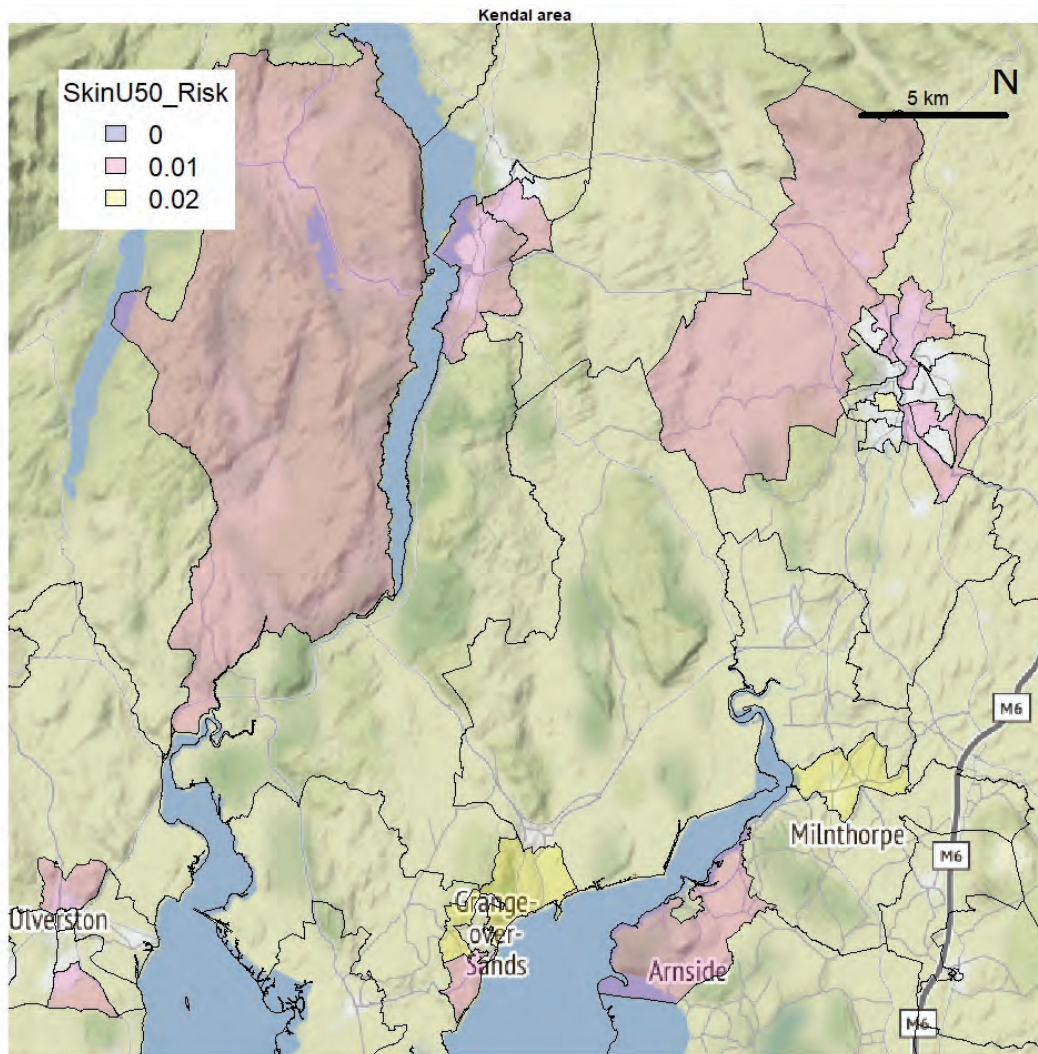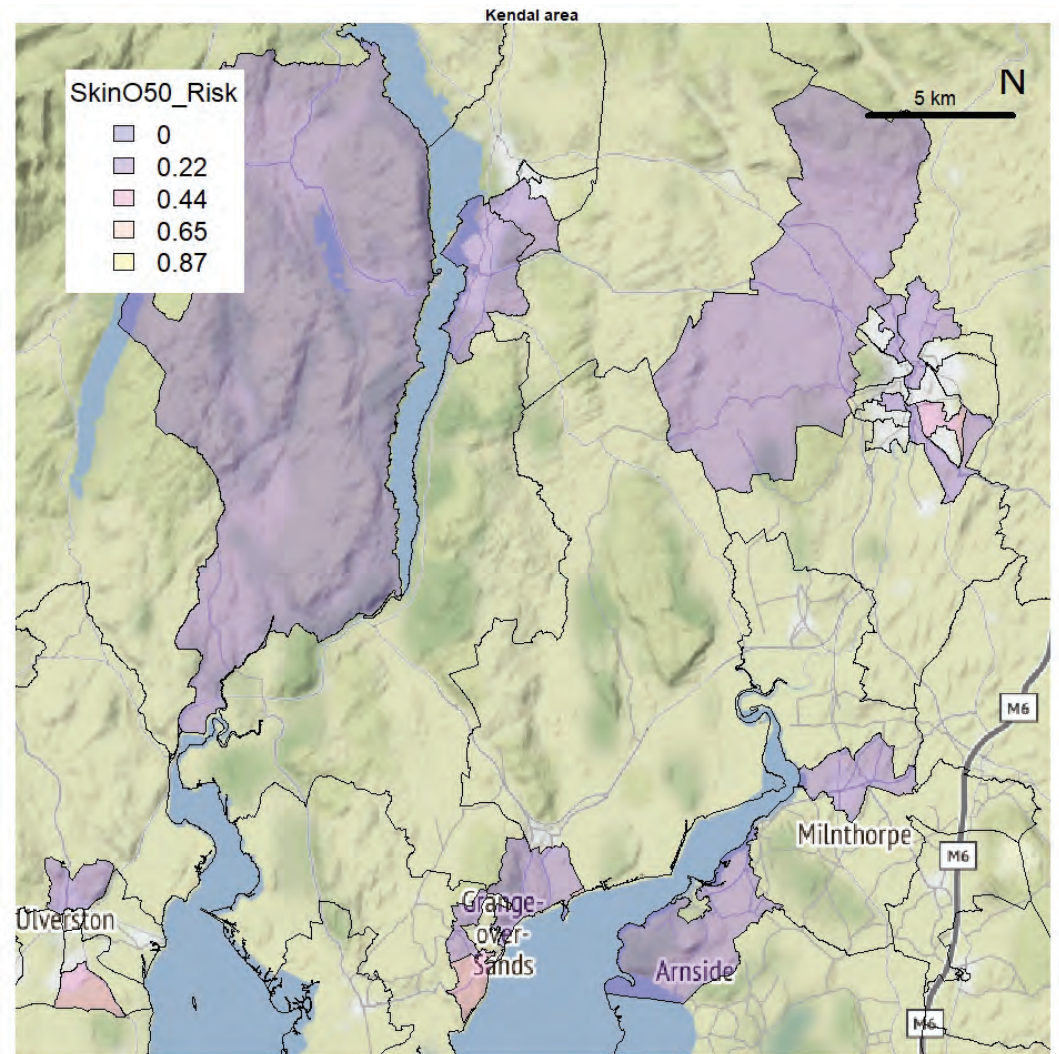



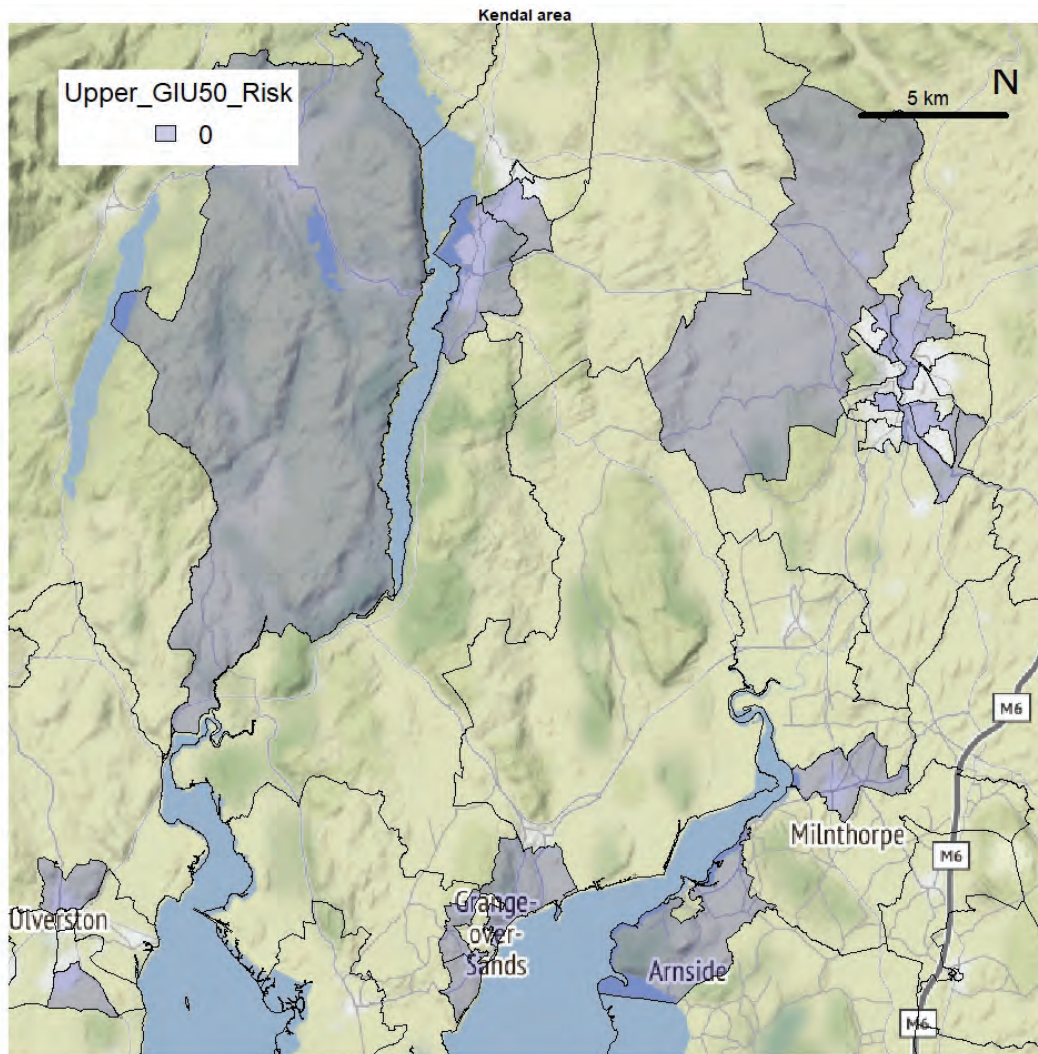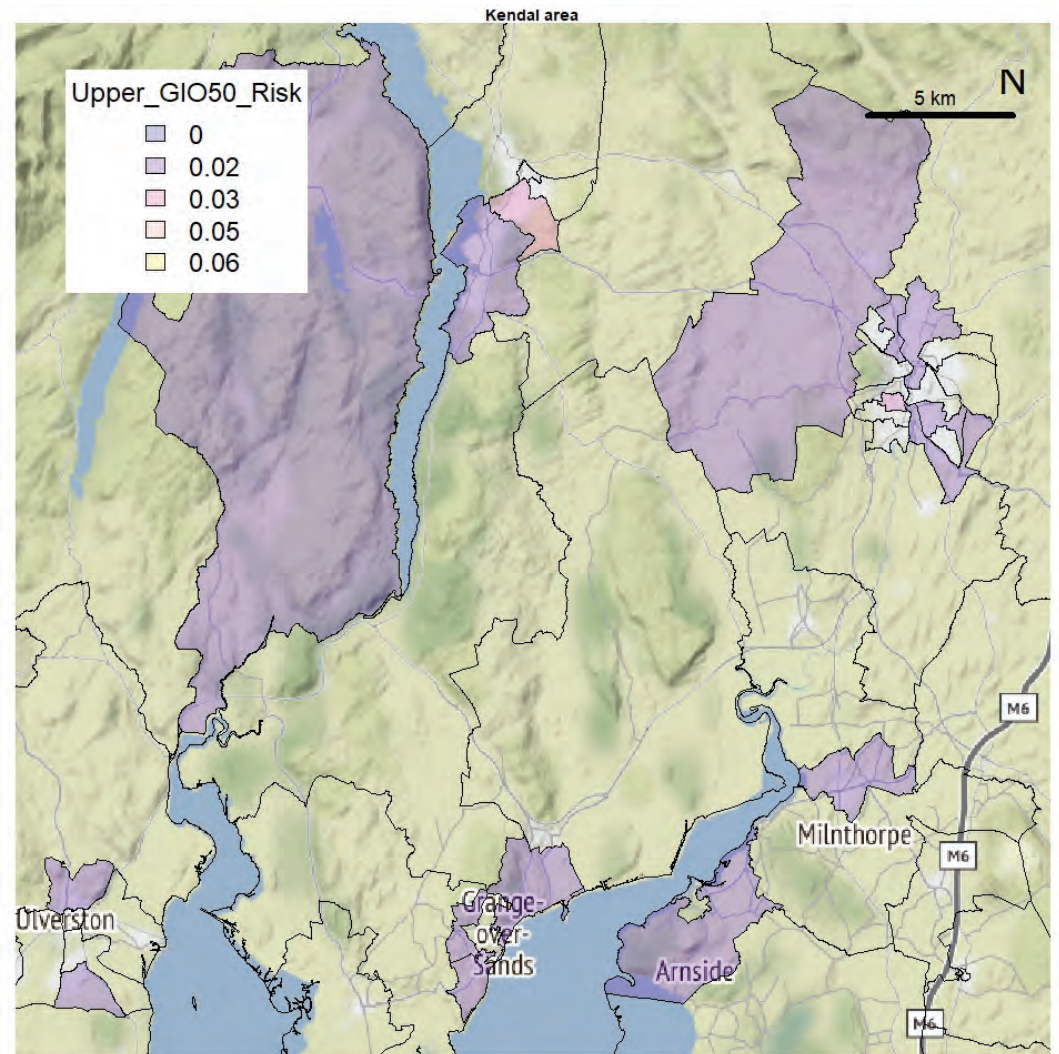

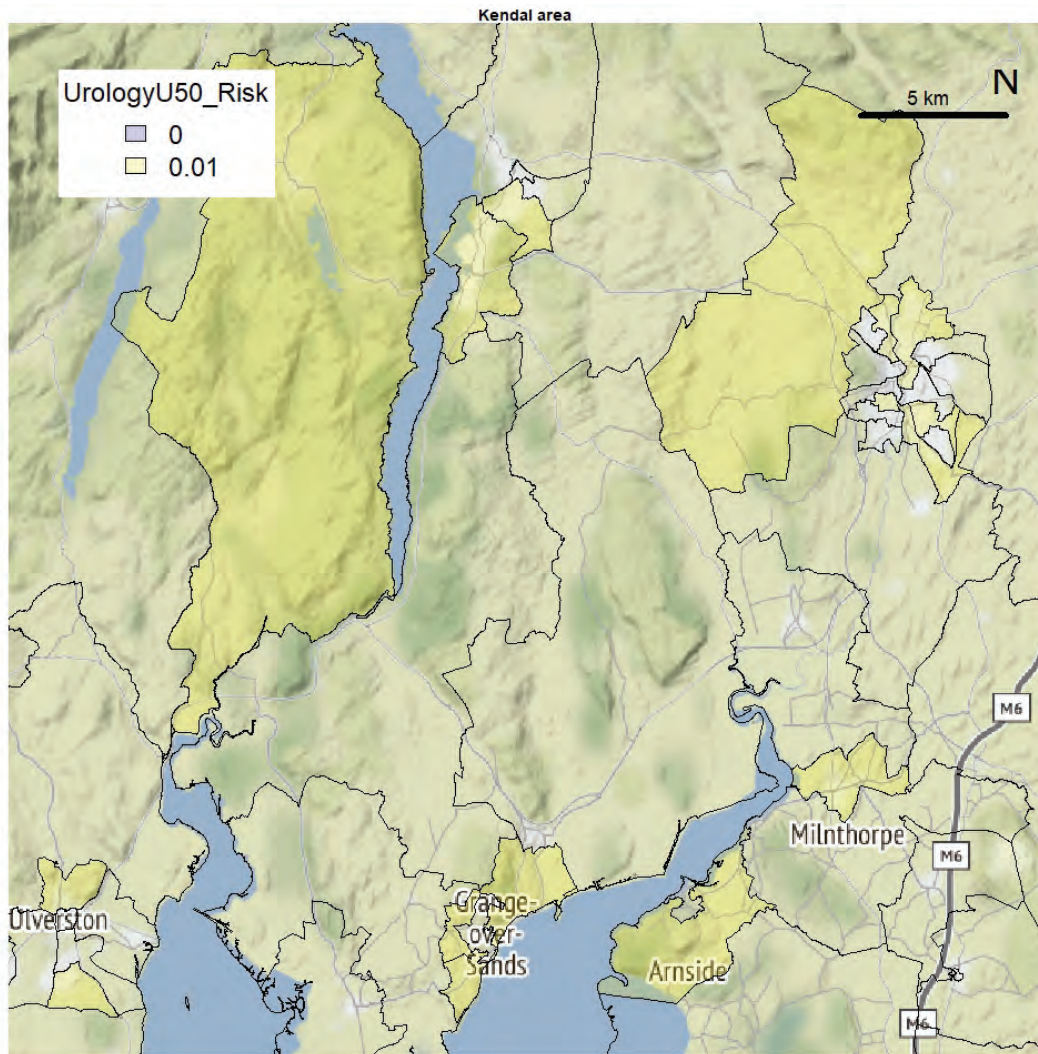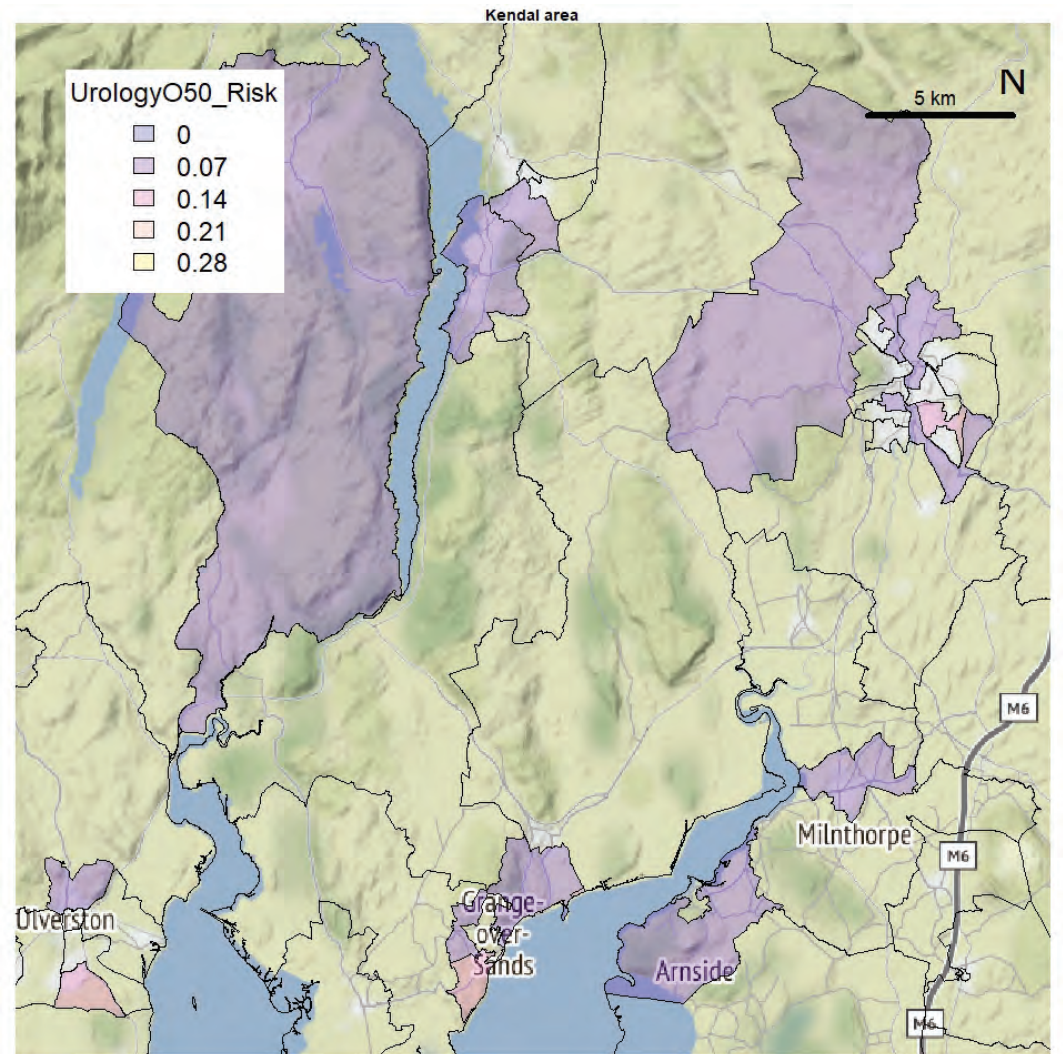

Supplementary Information S11: Corregionalisation between pairs of cancer types

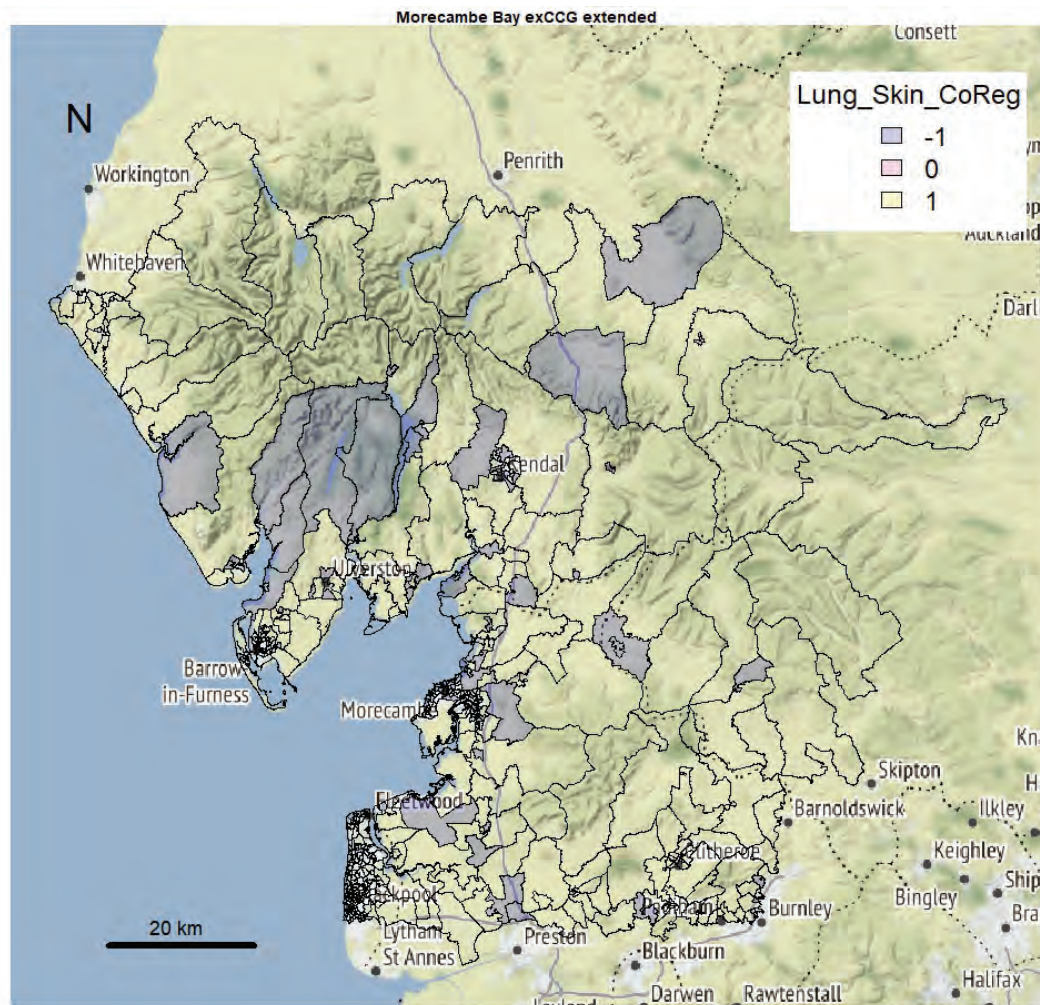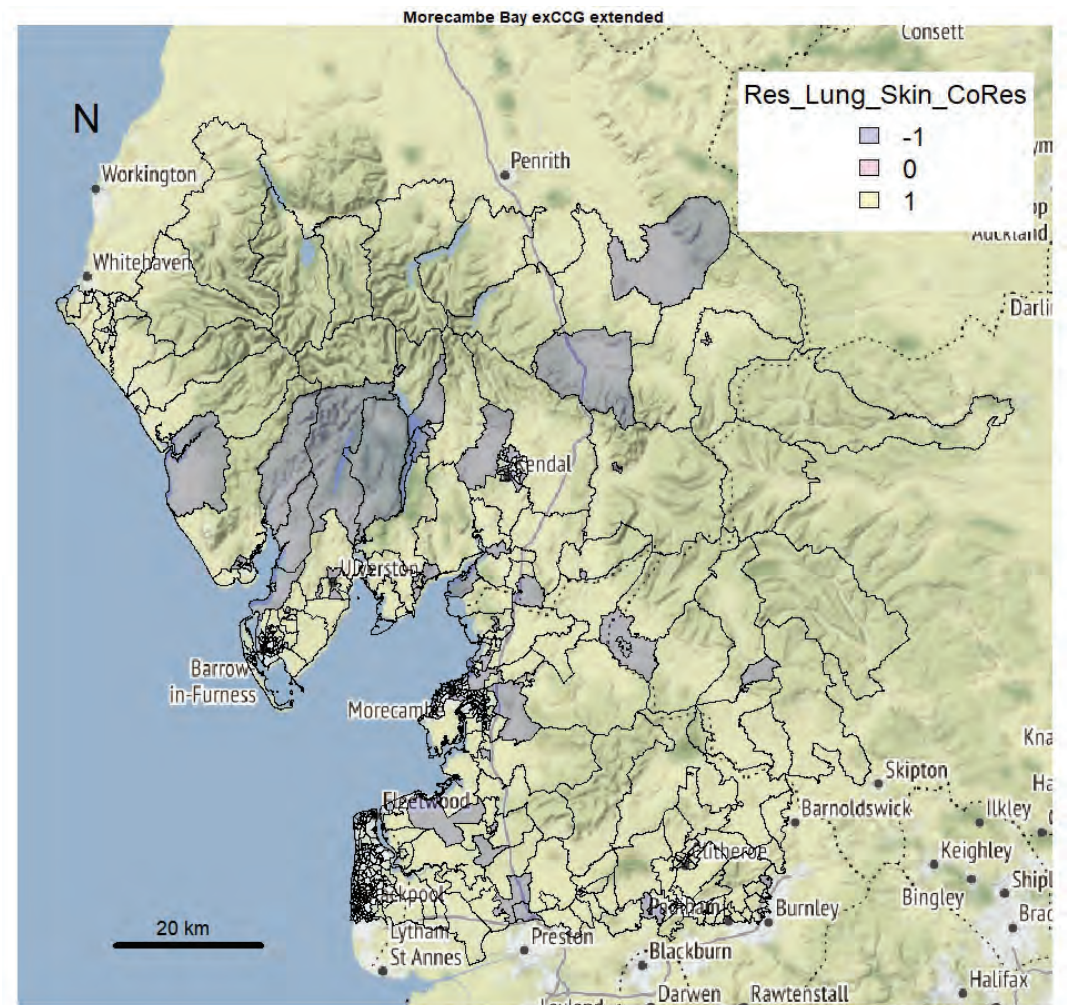

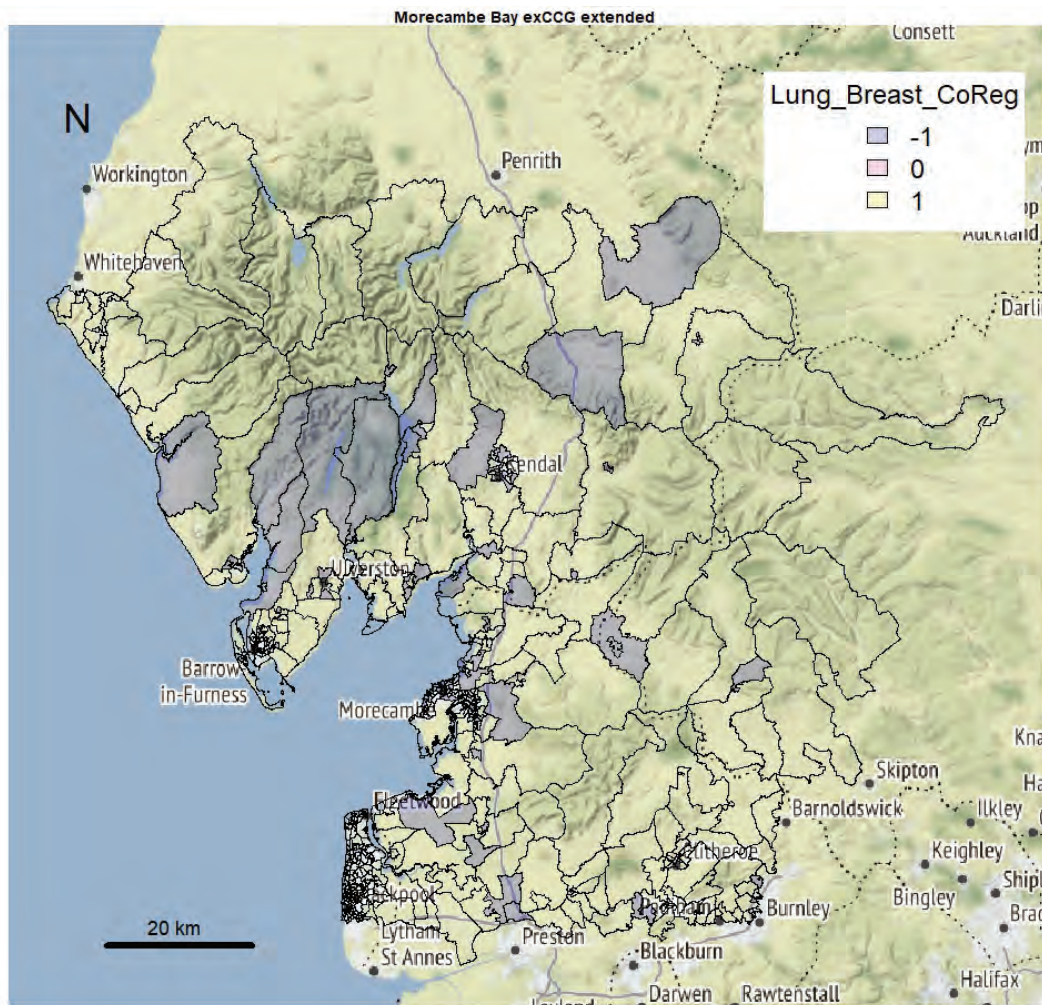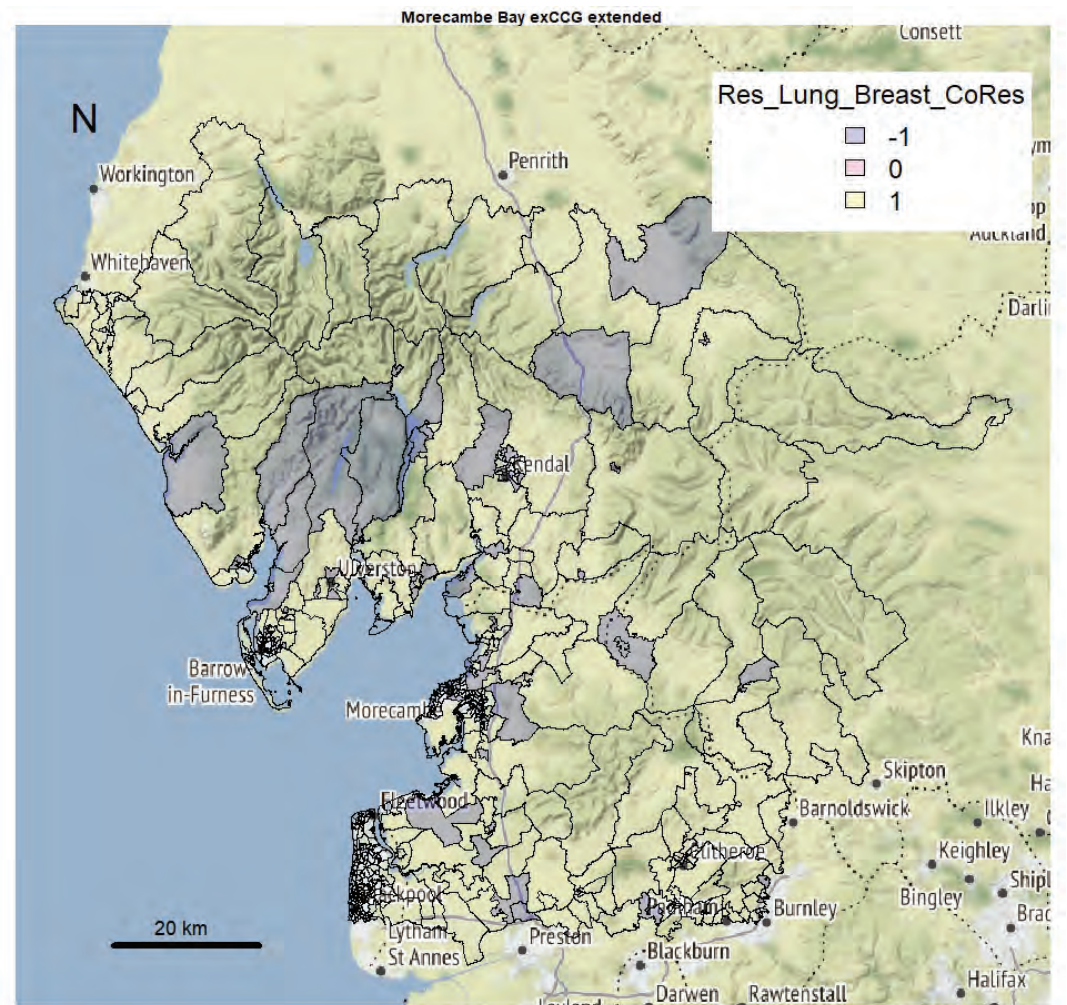

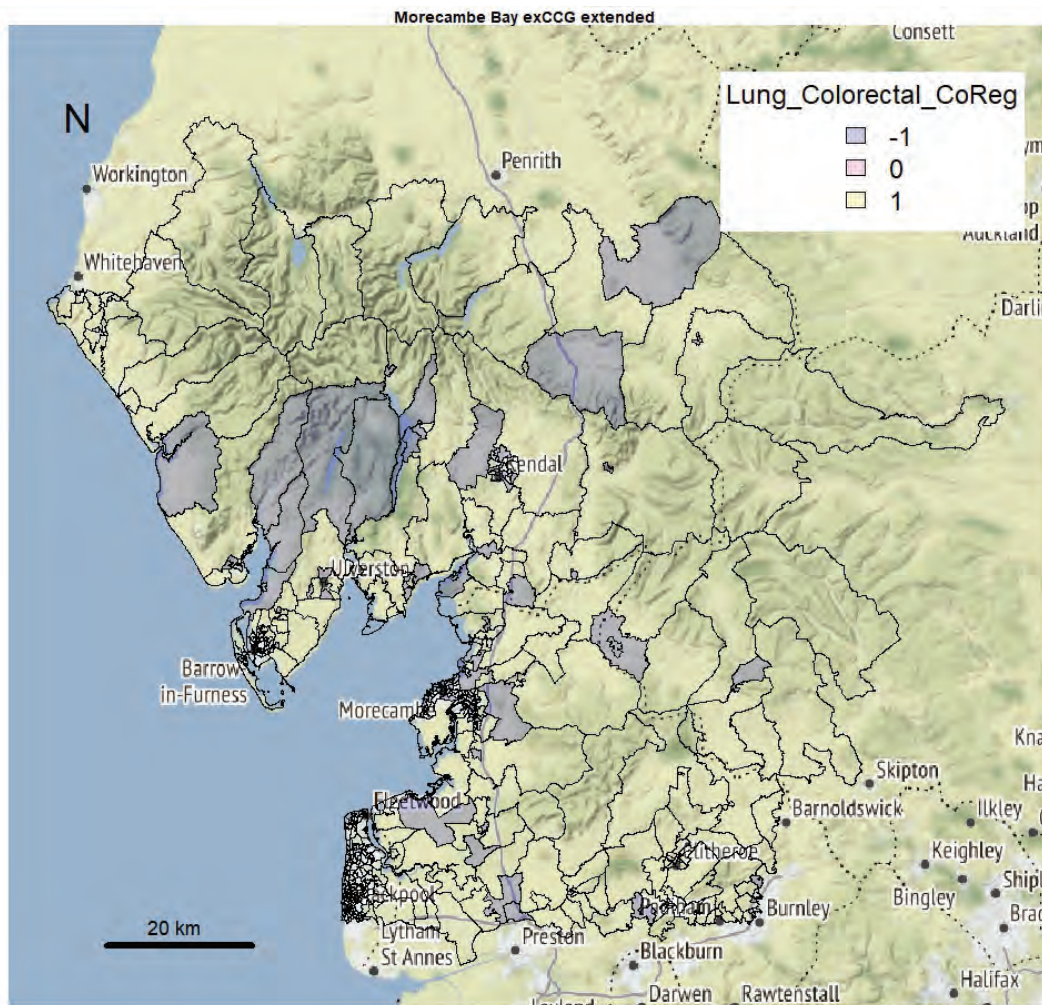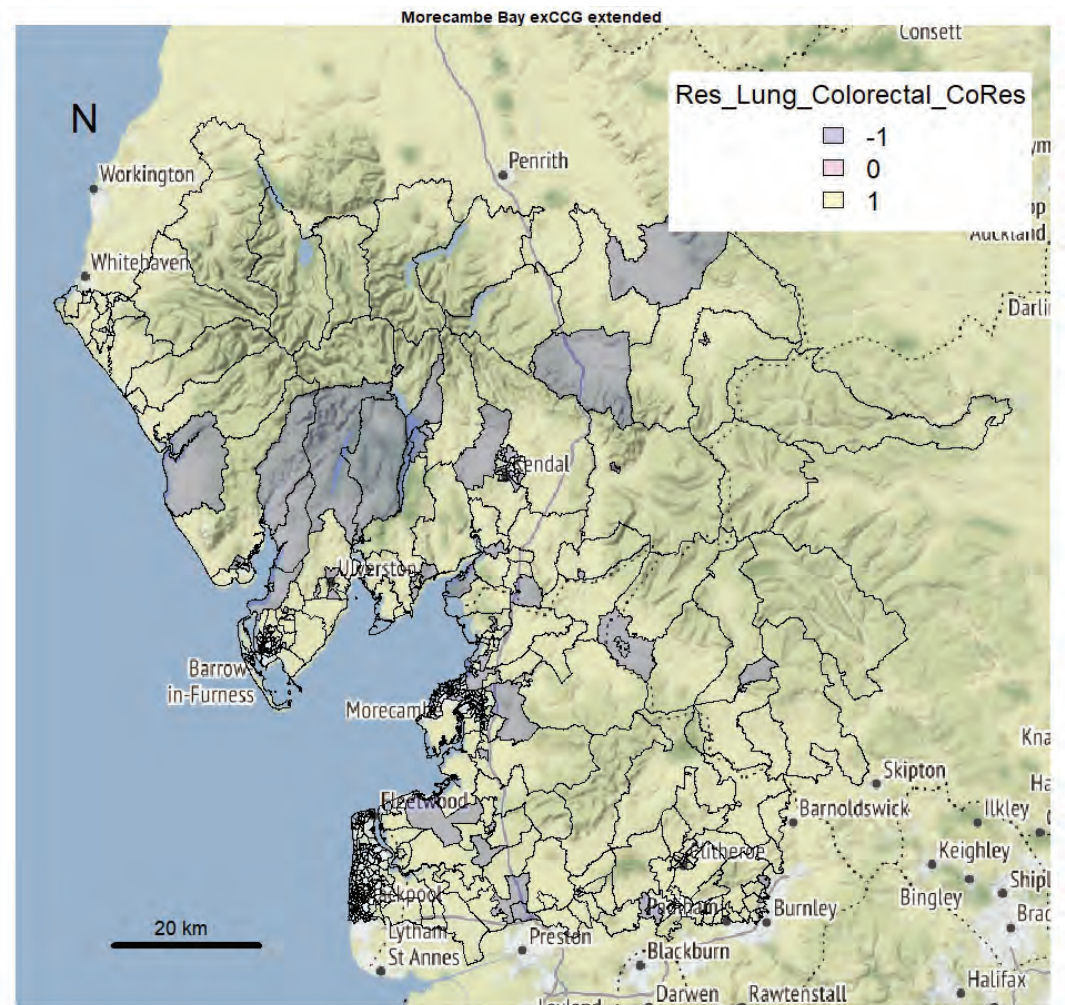

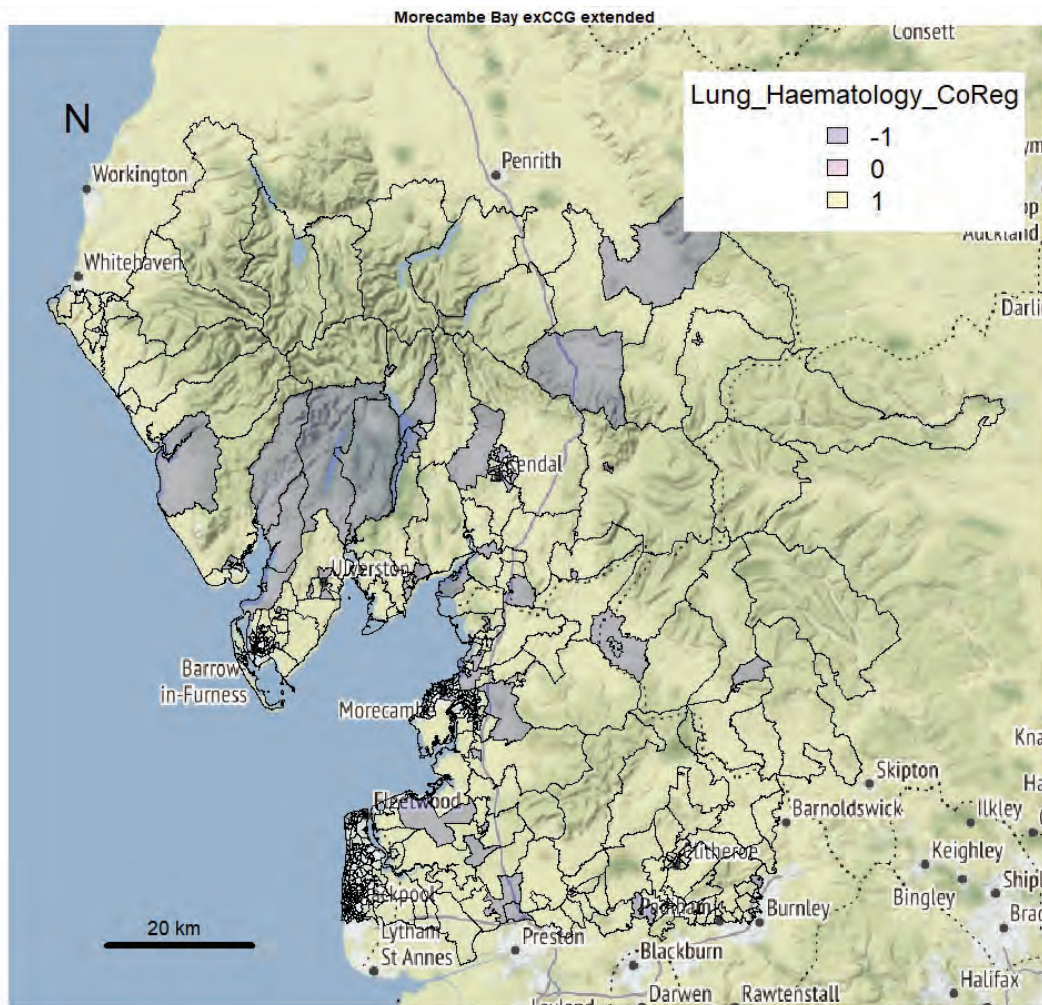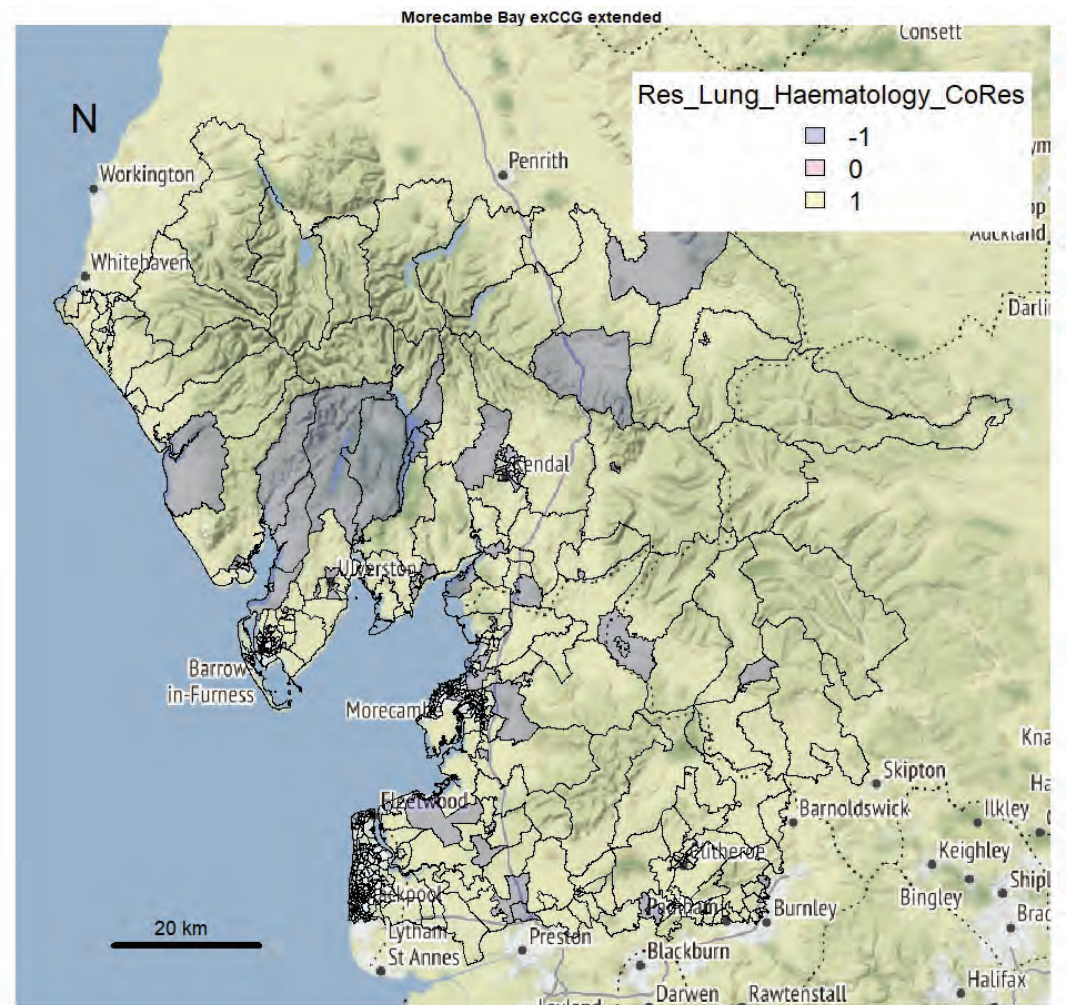

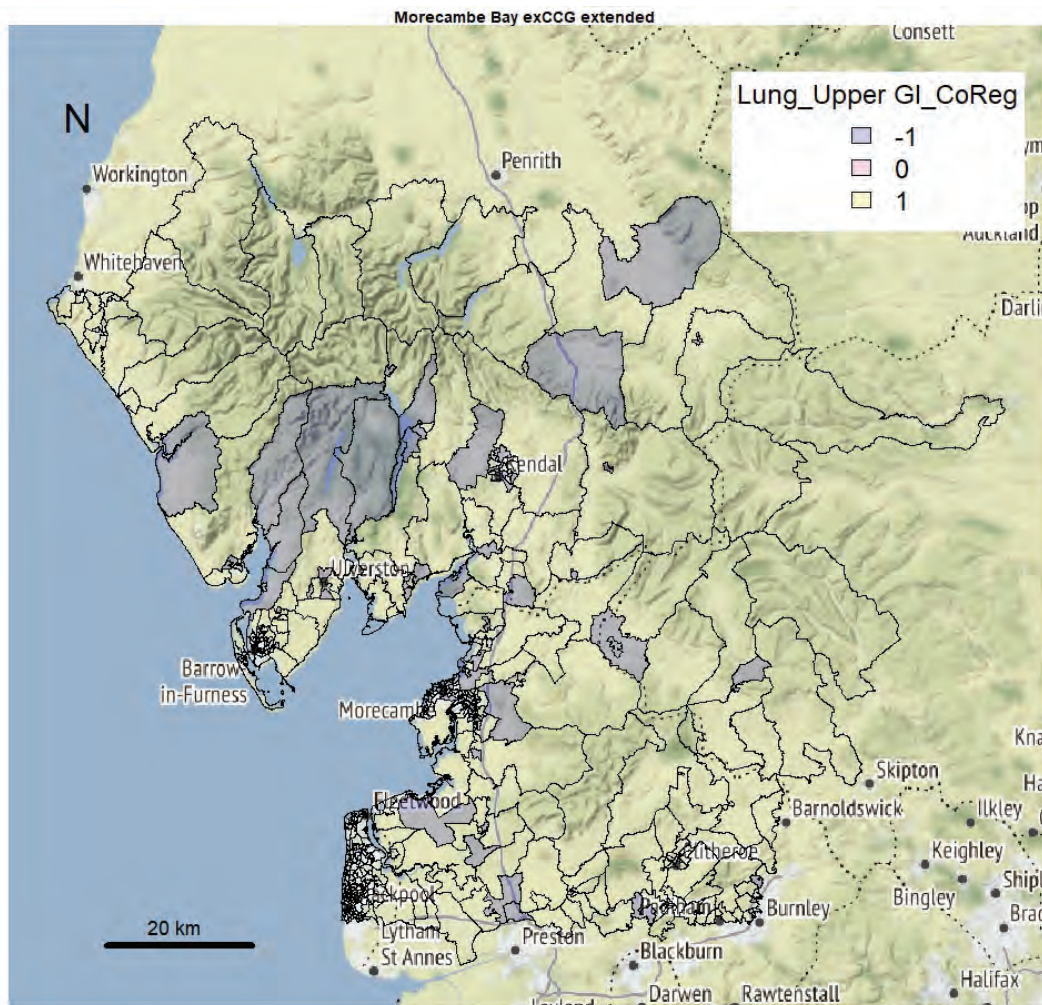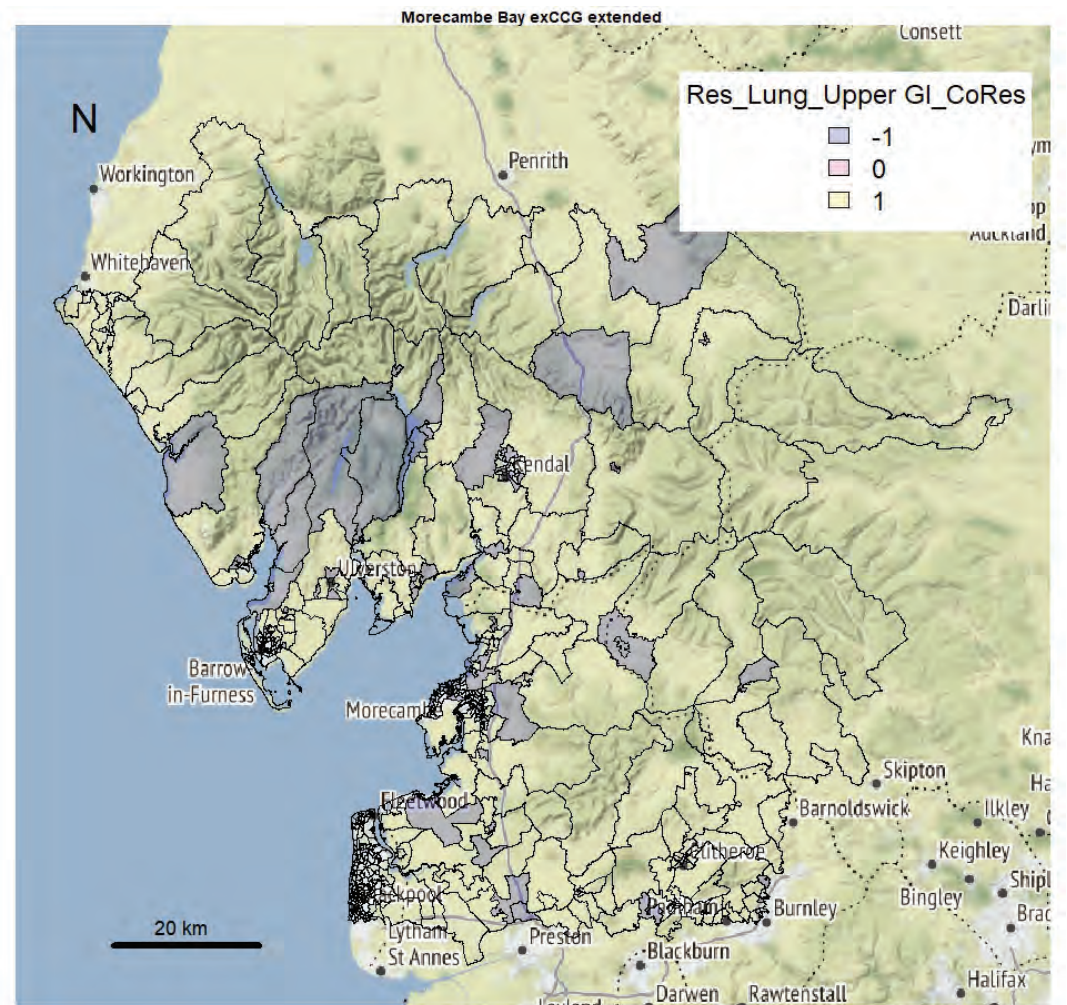

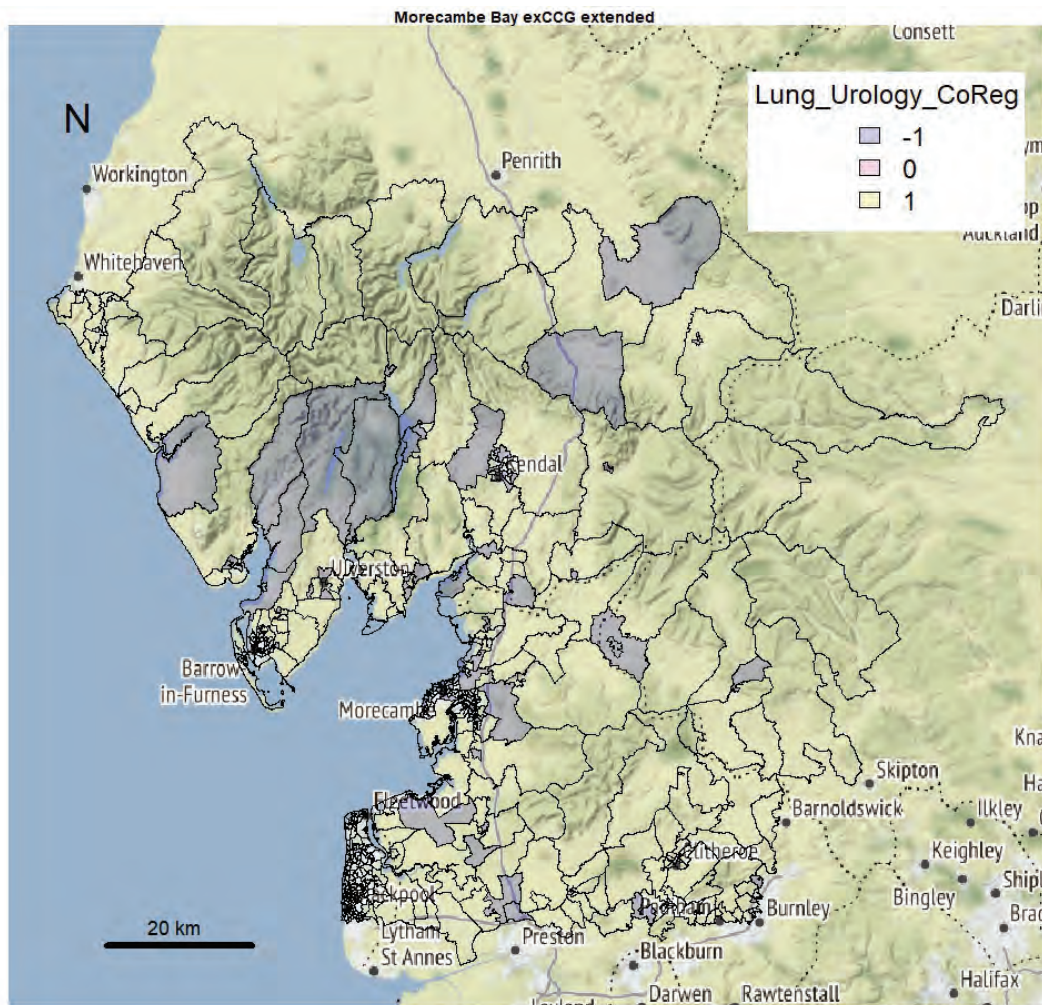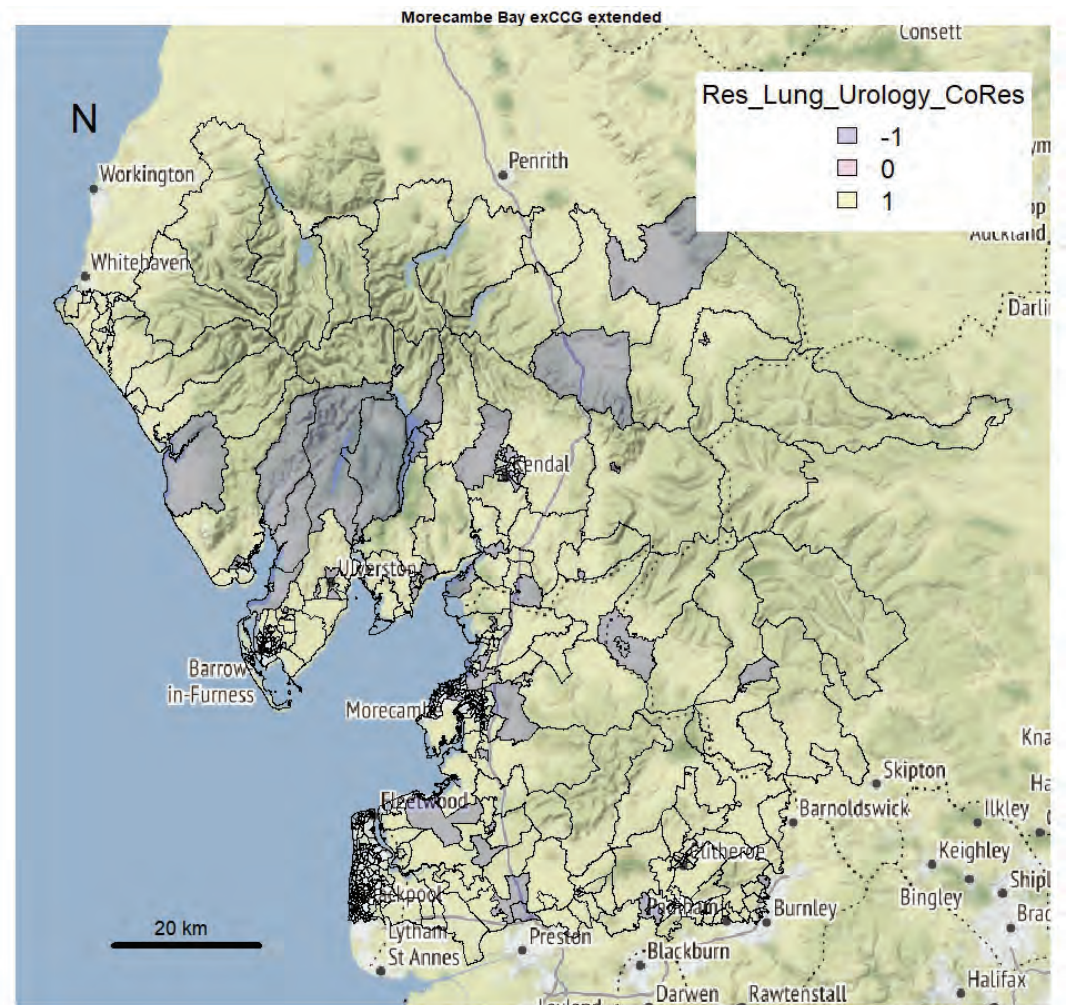



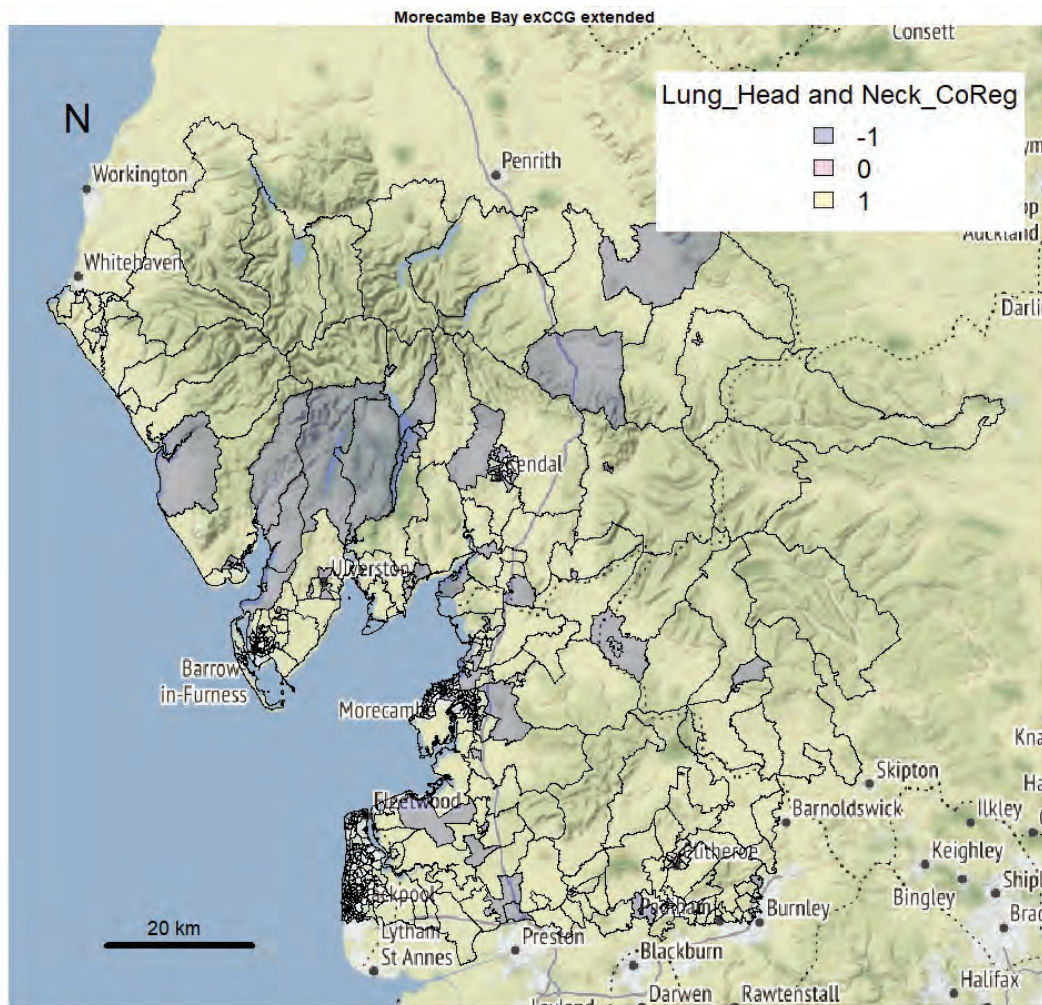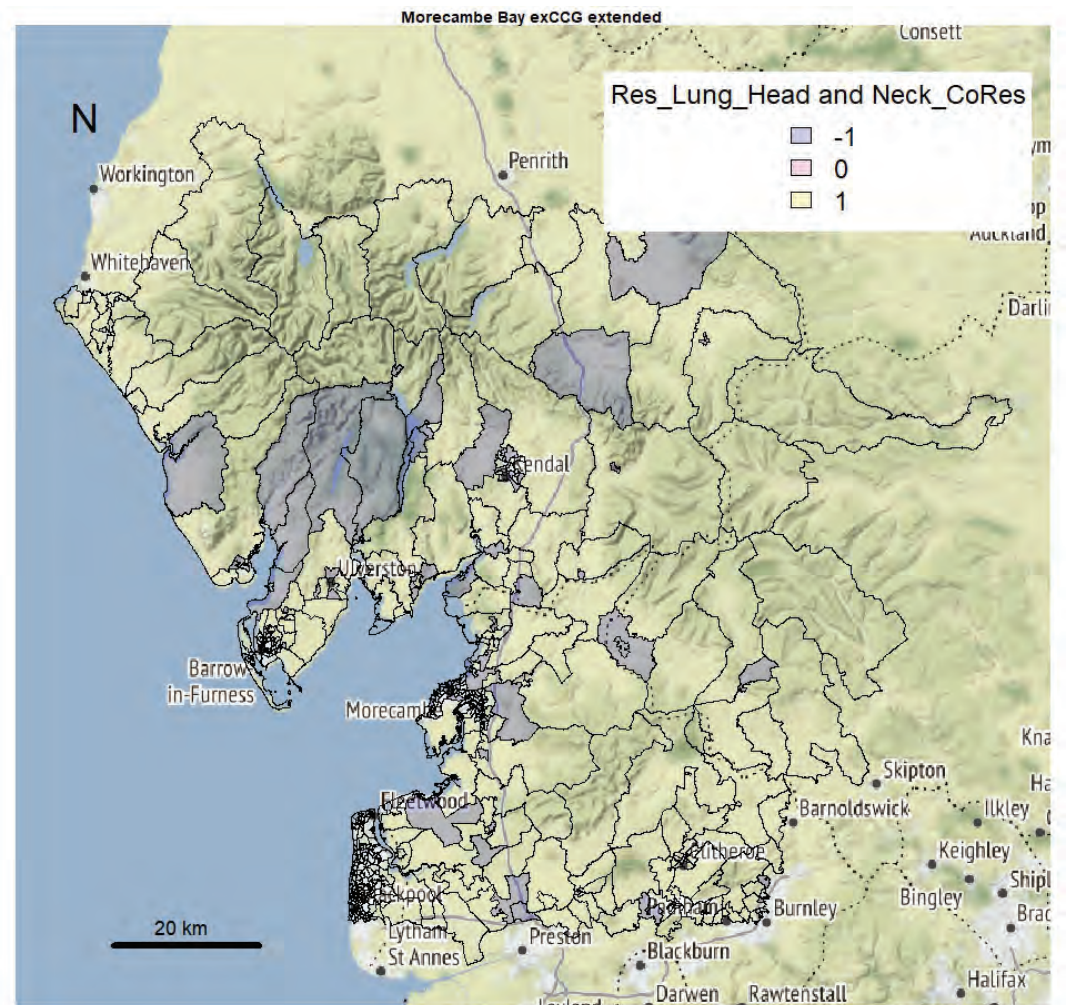

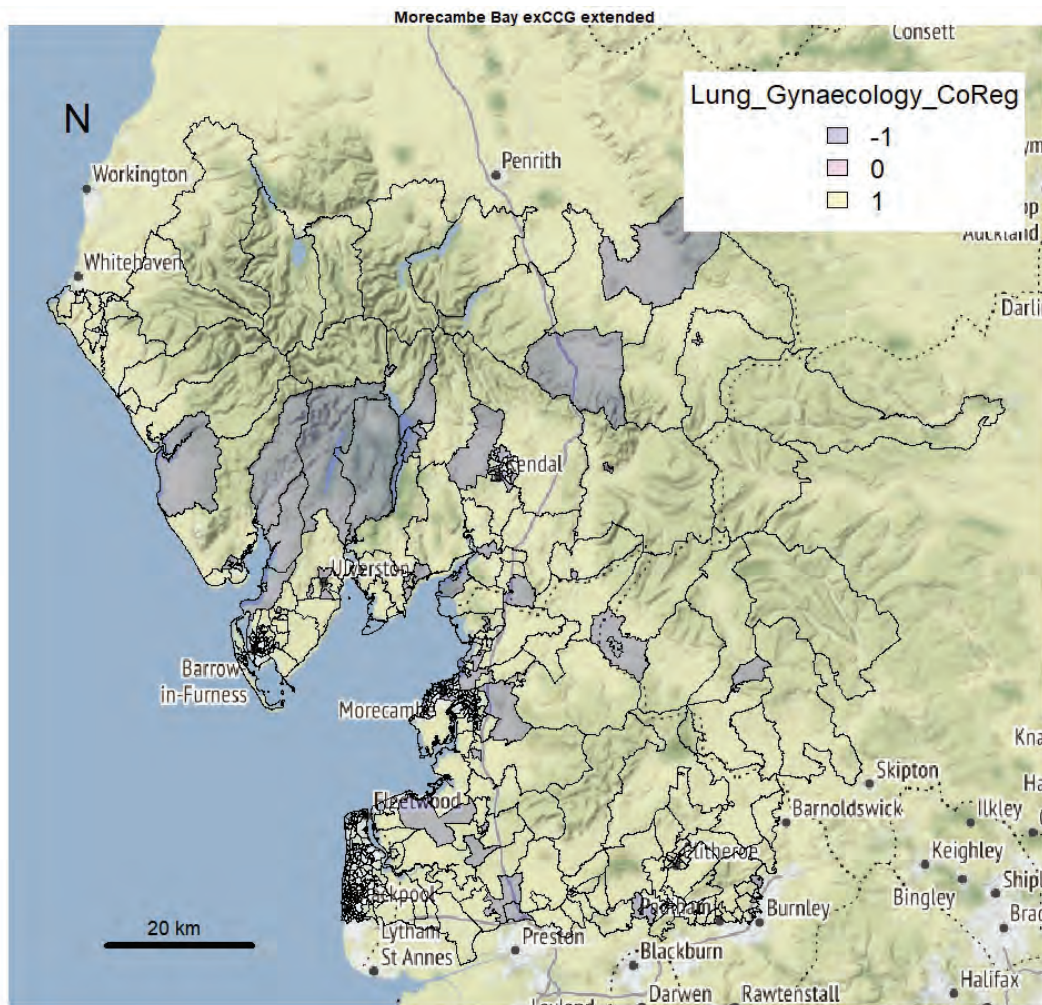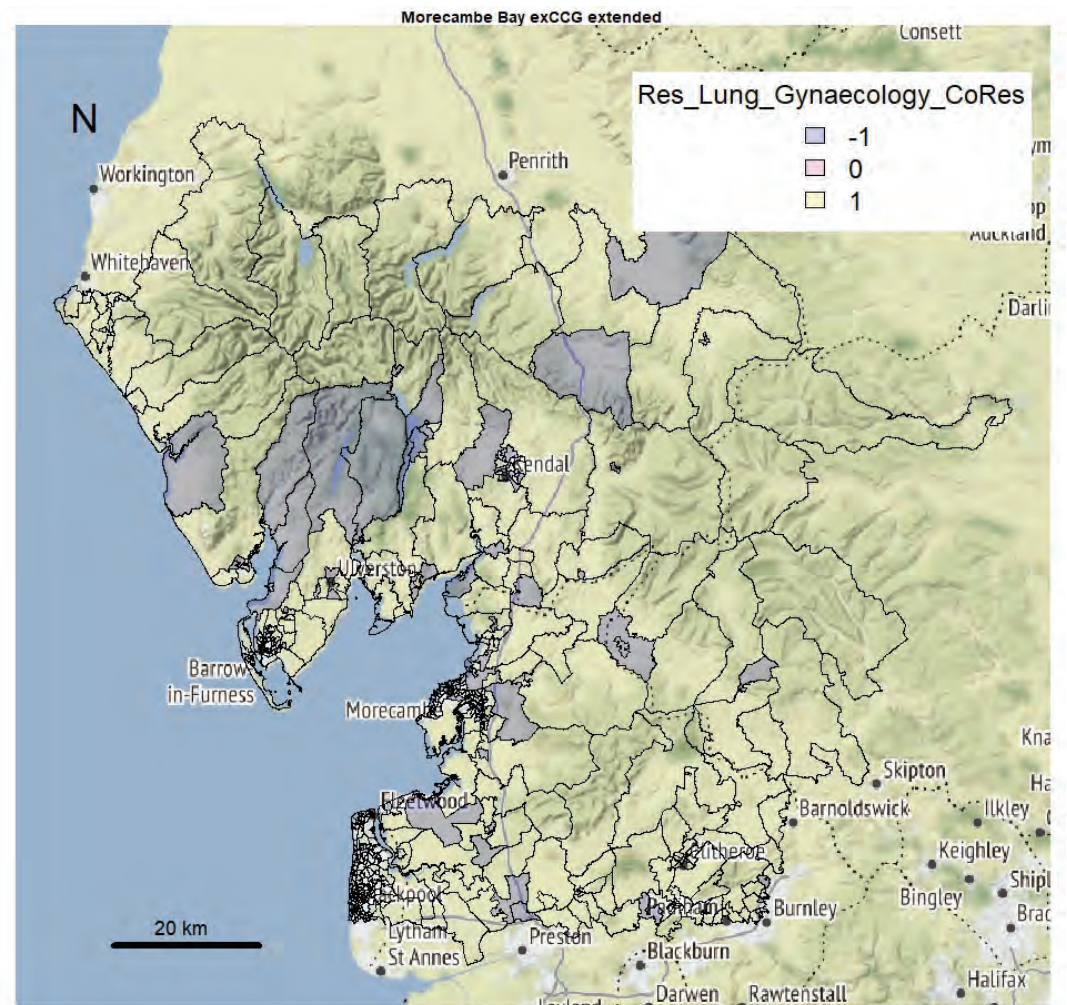

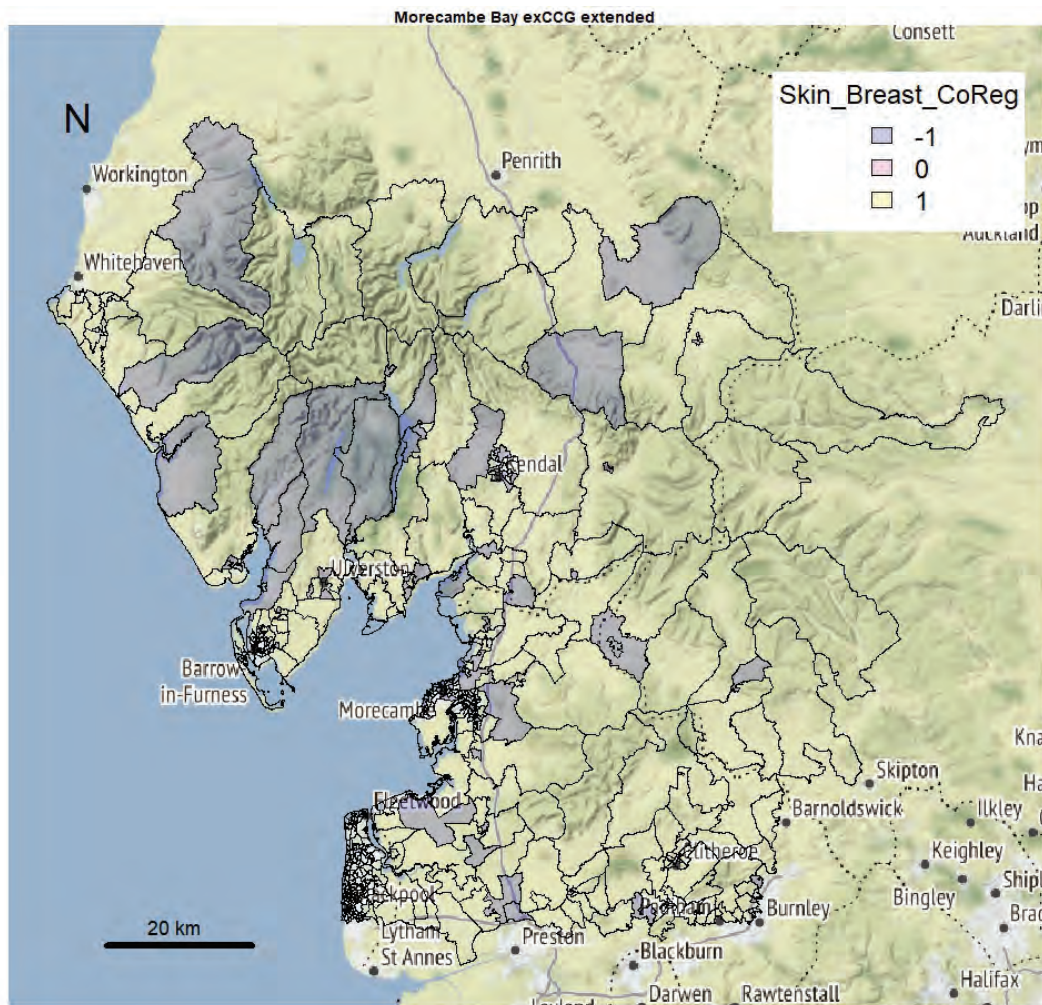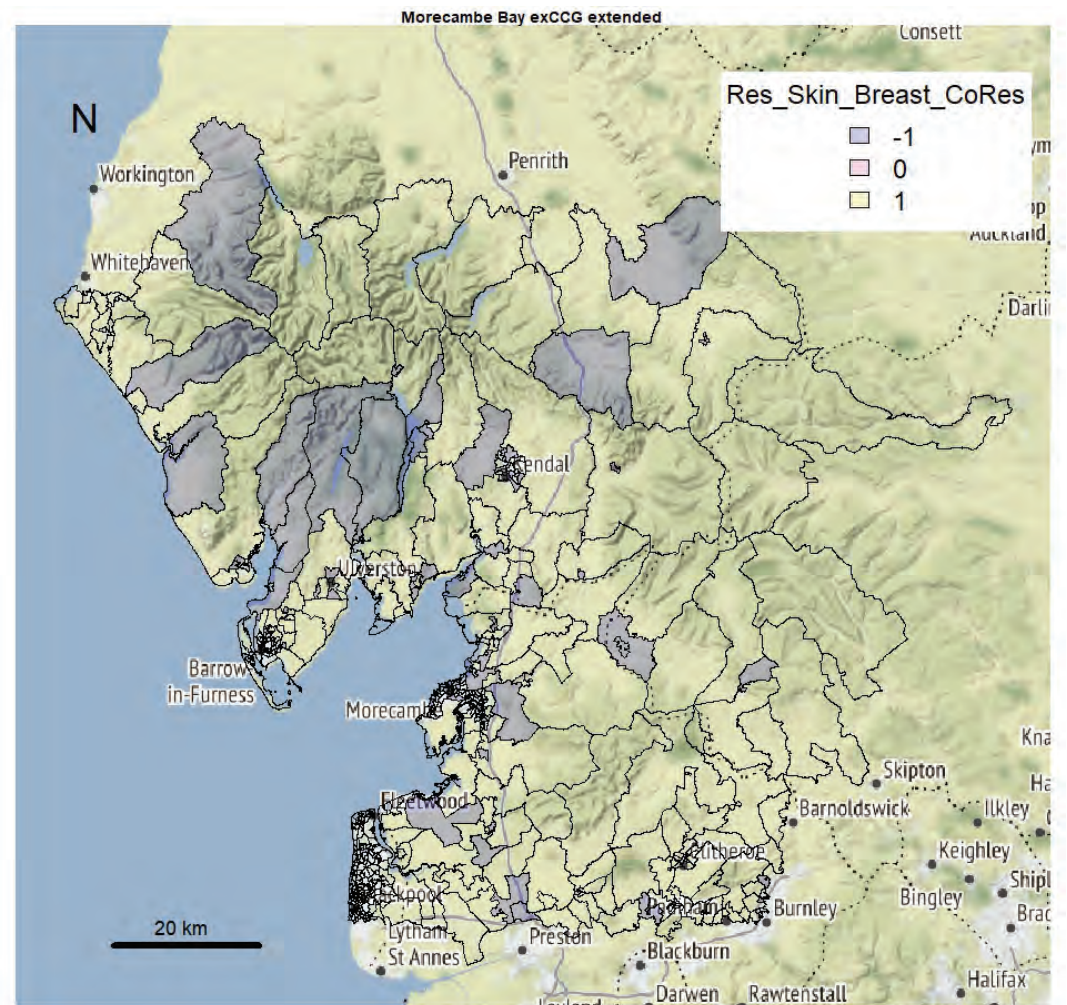

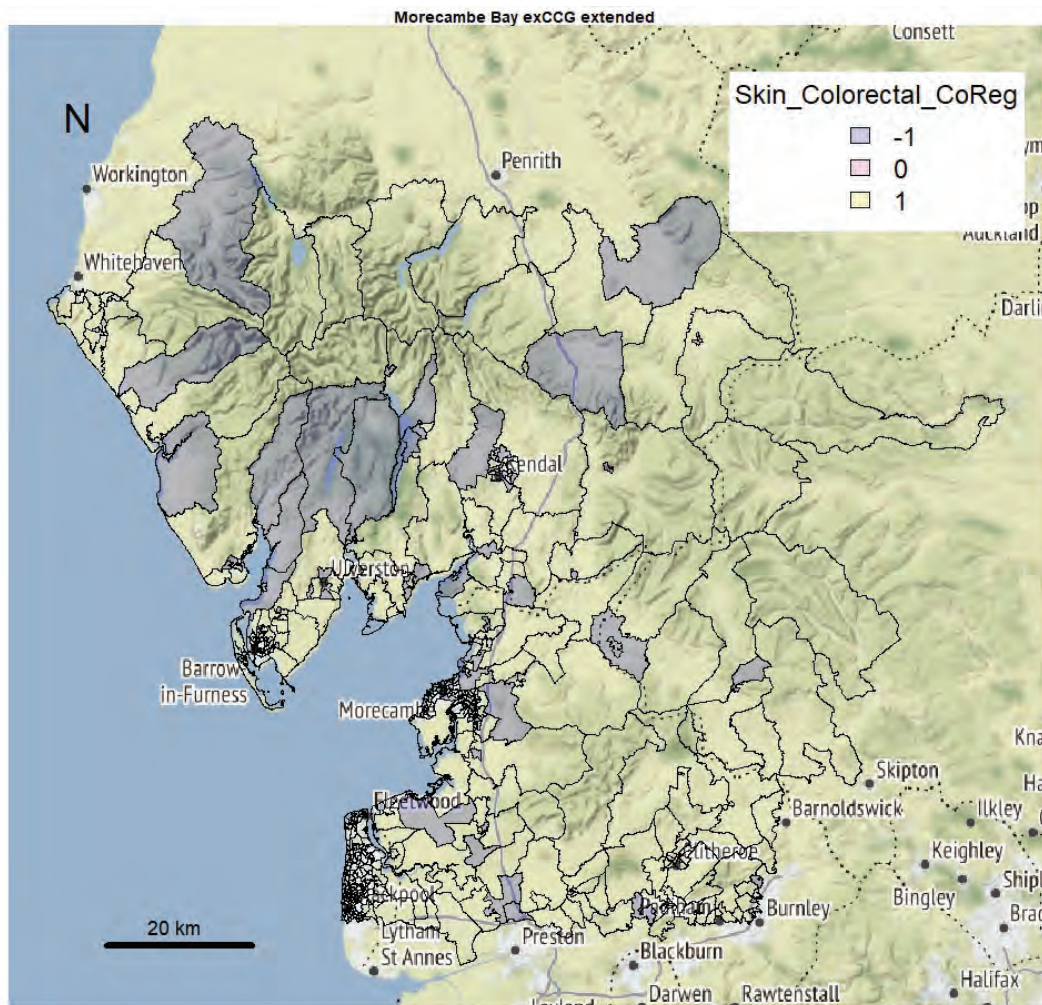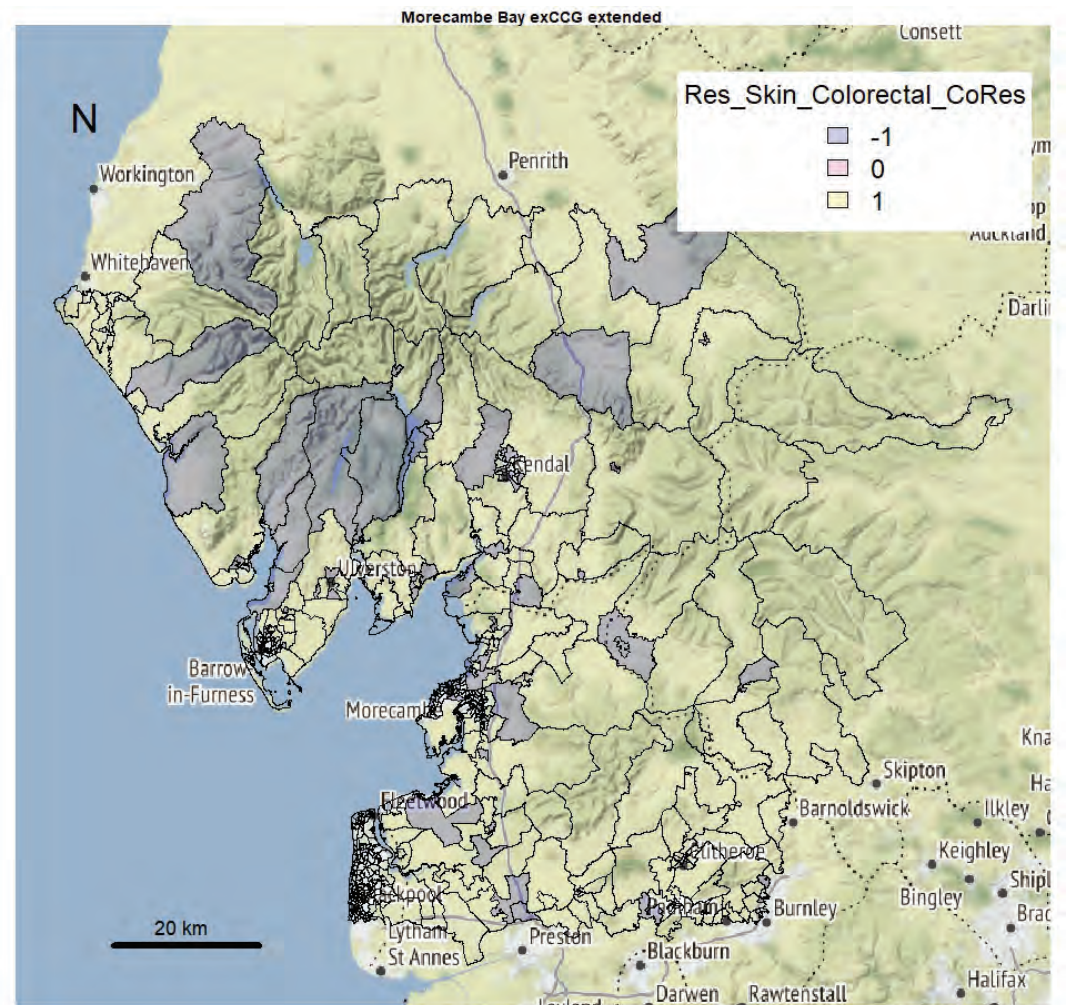

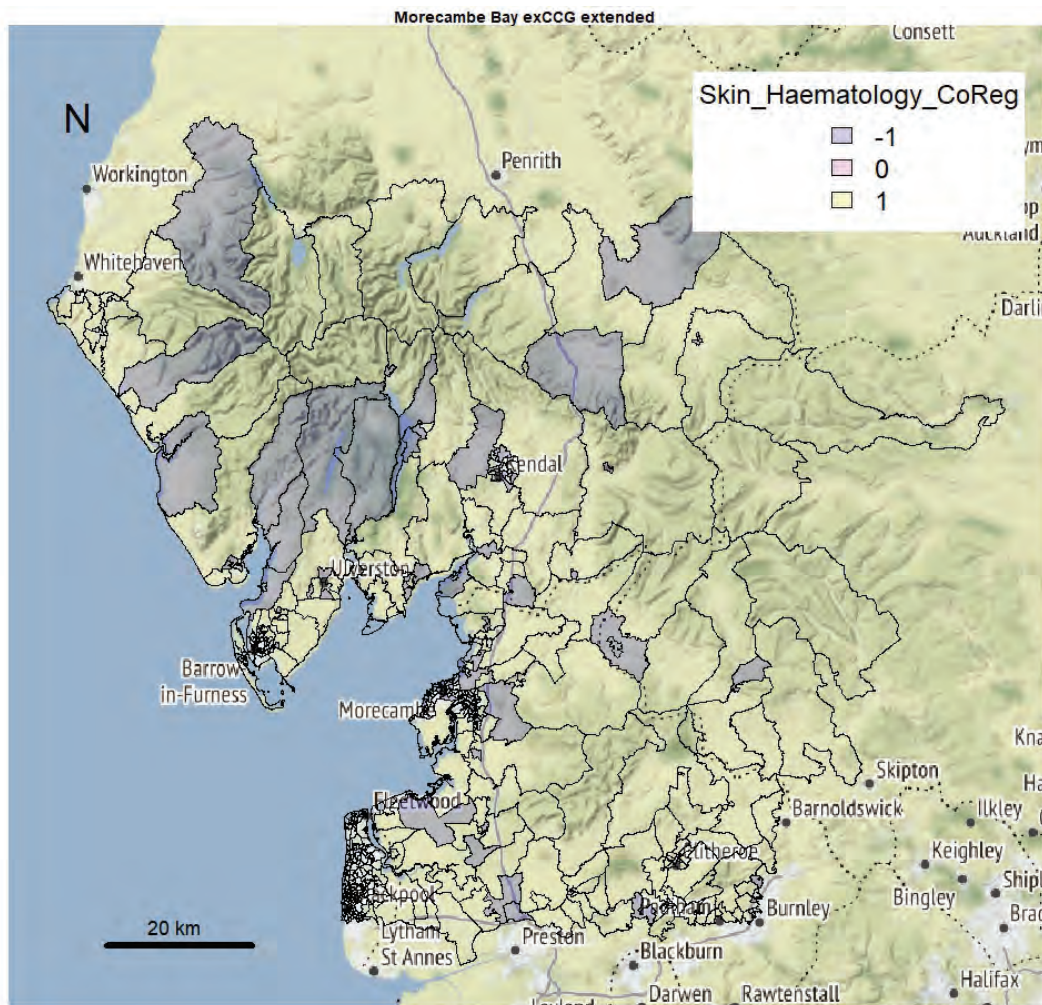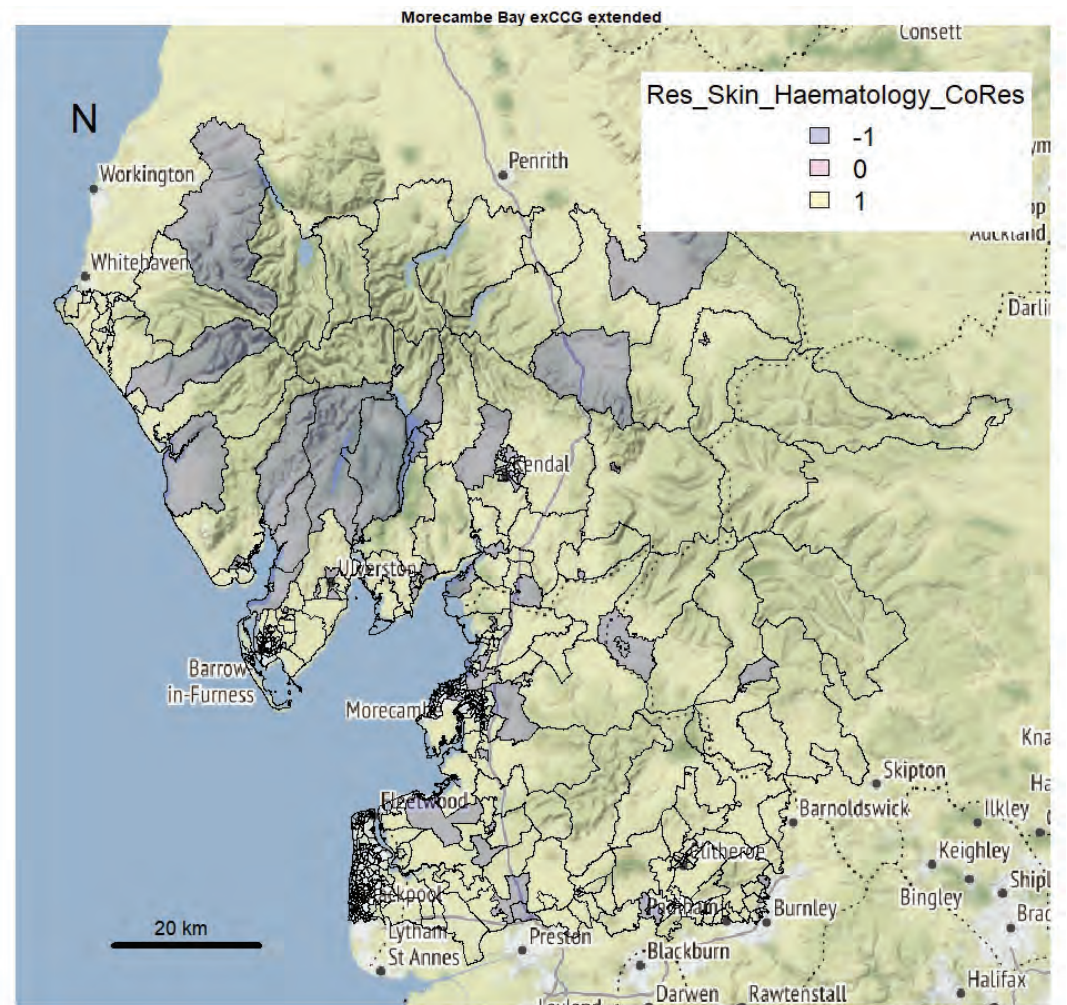

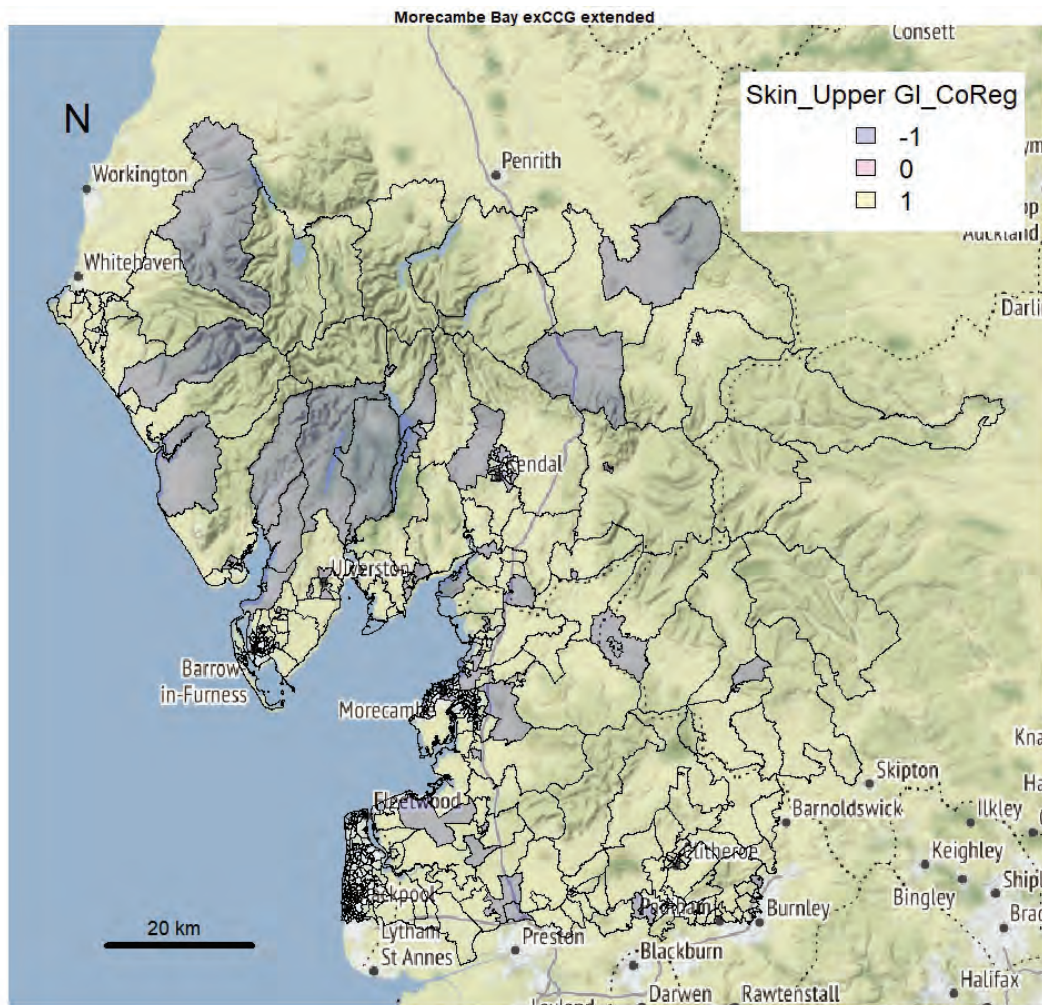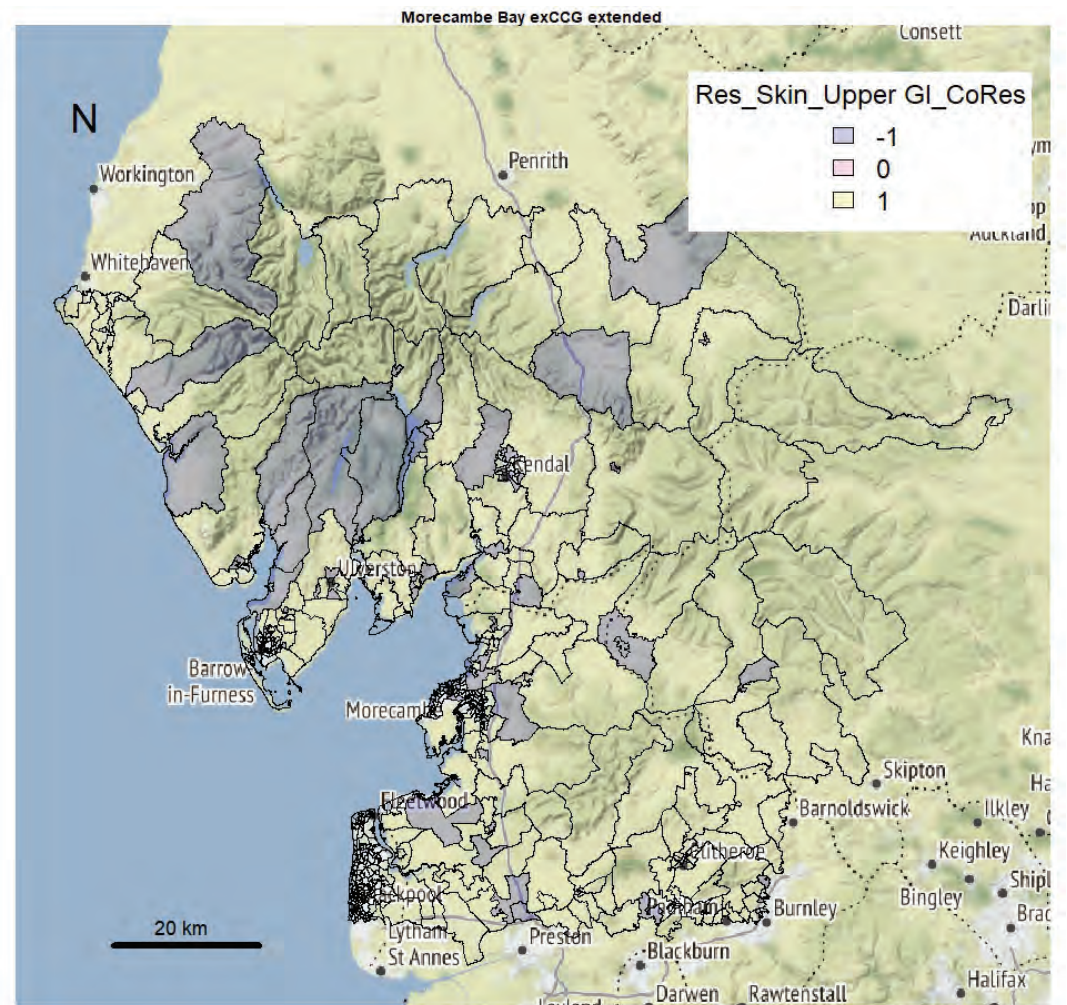

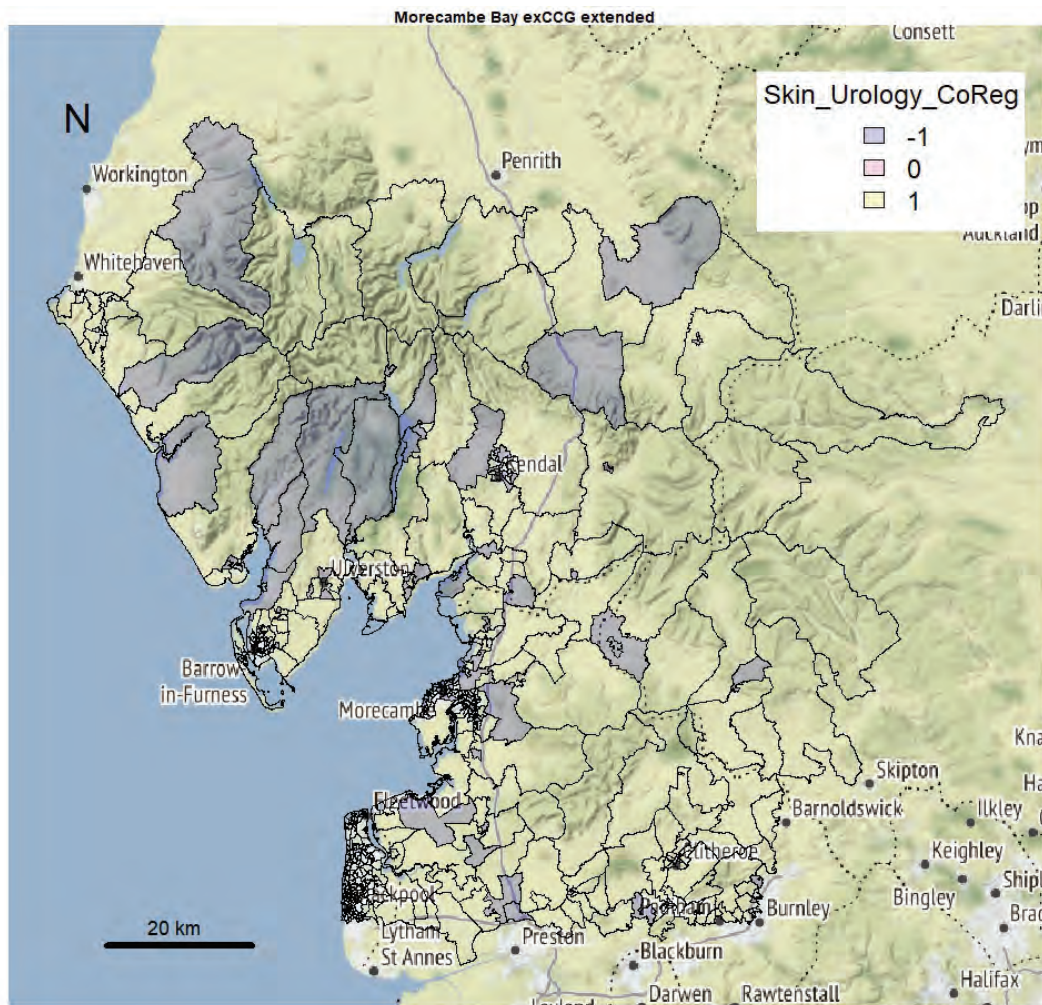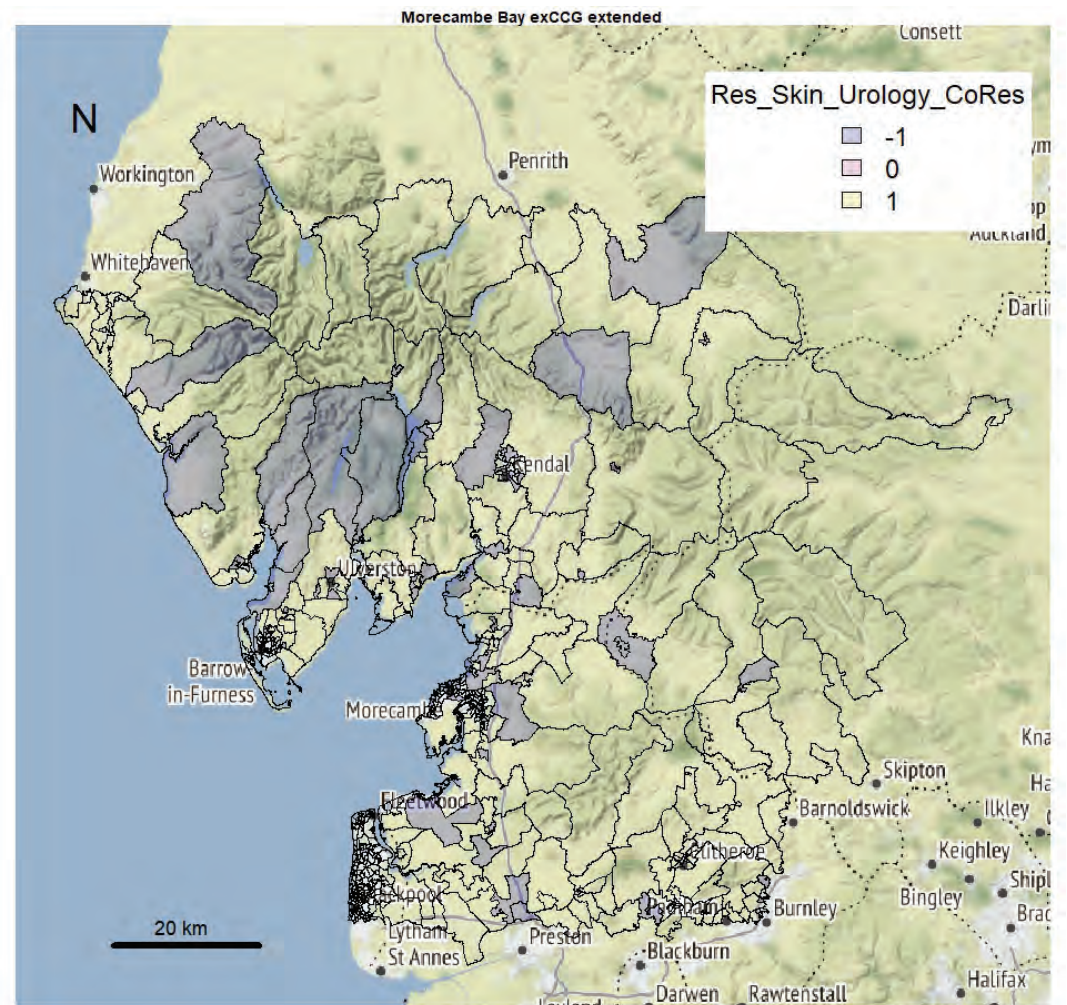

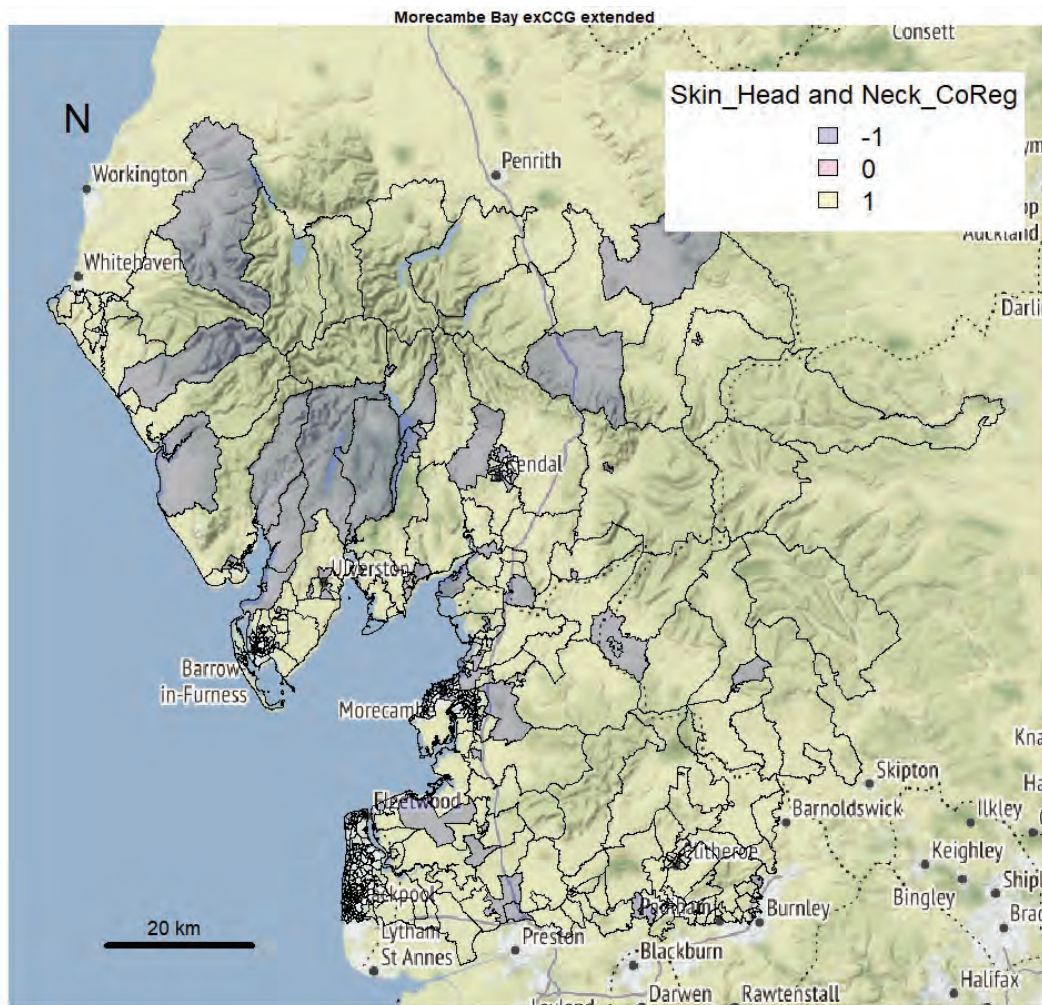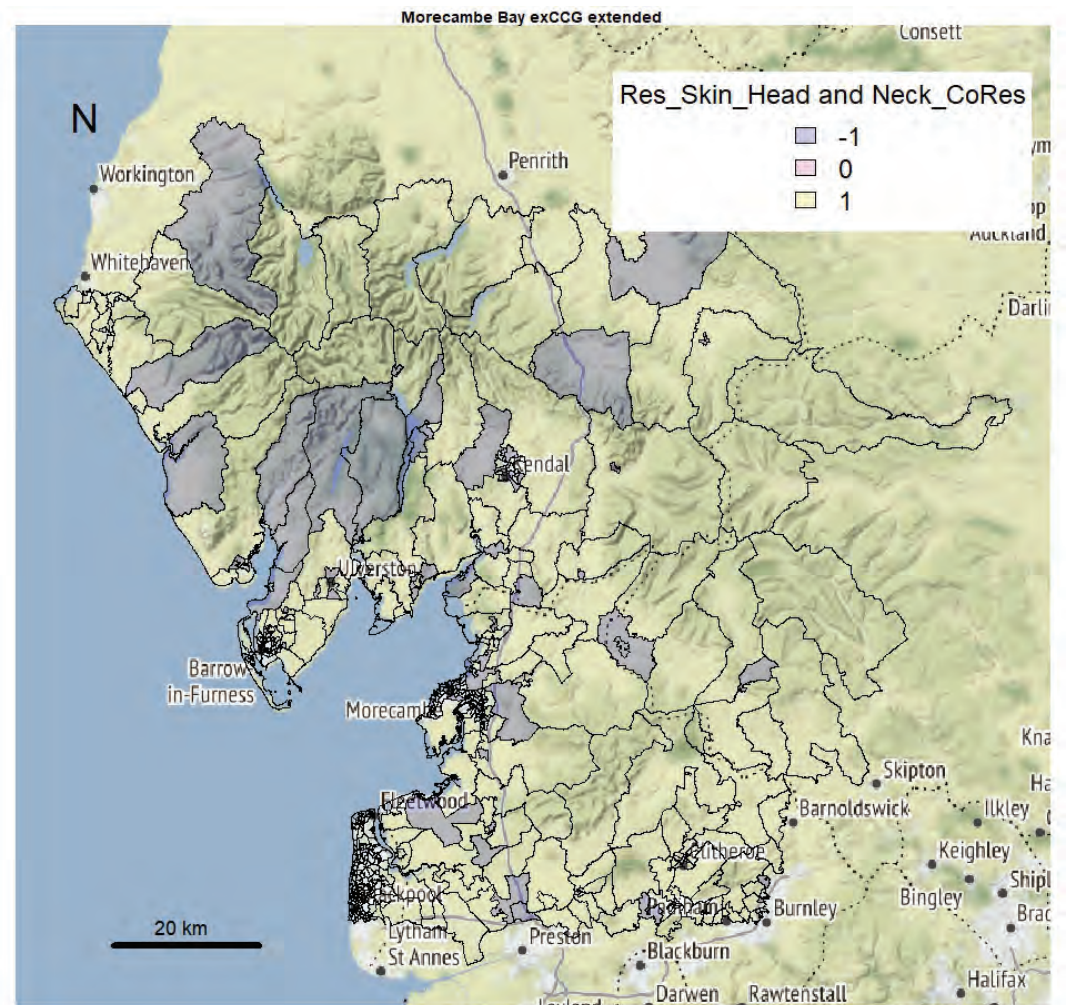



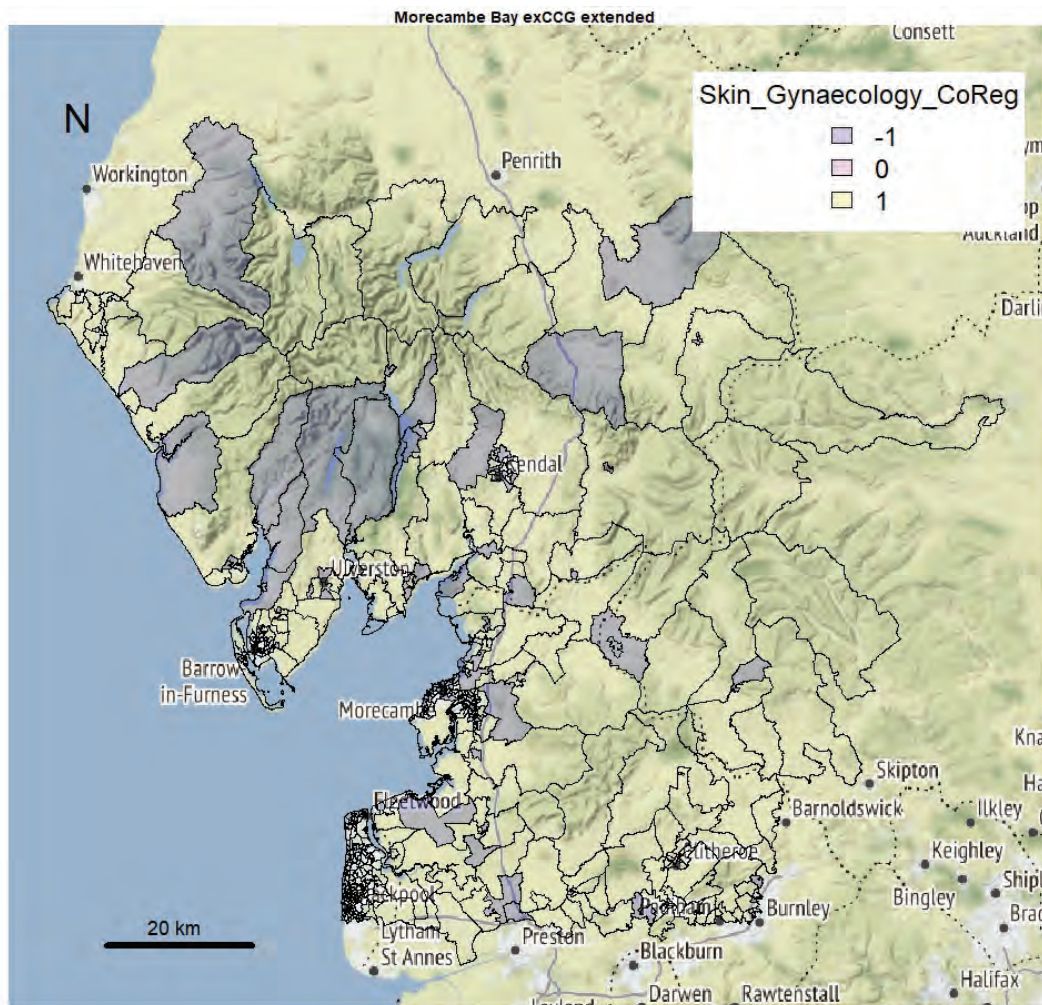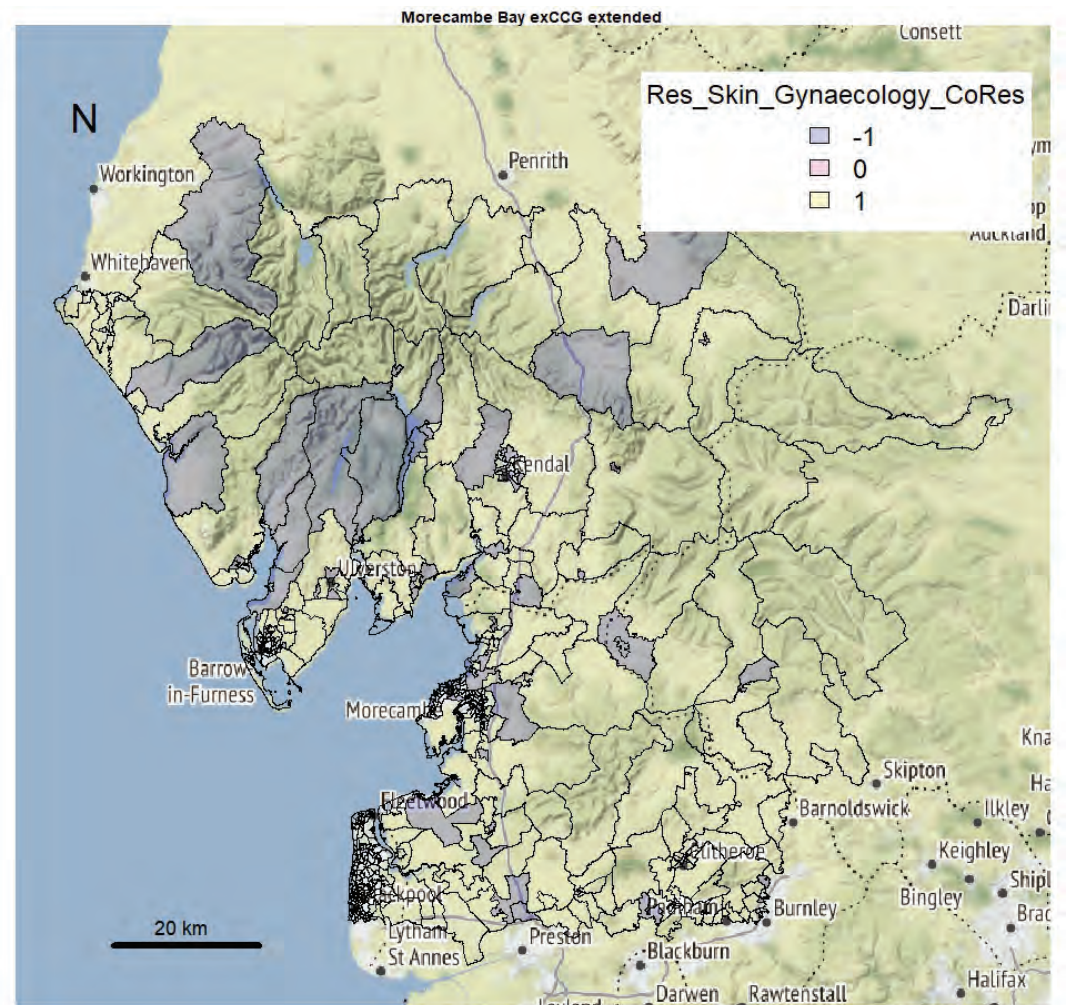

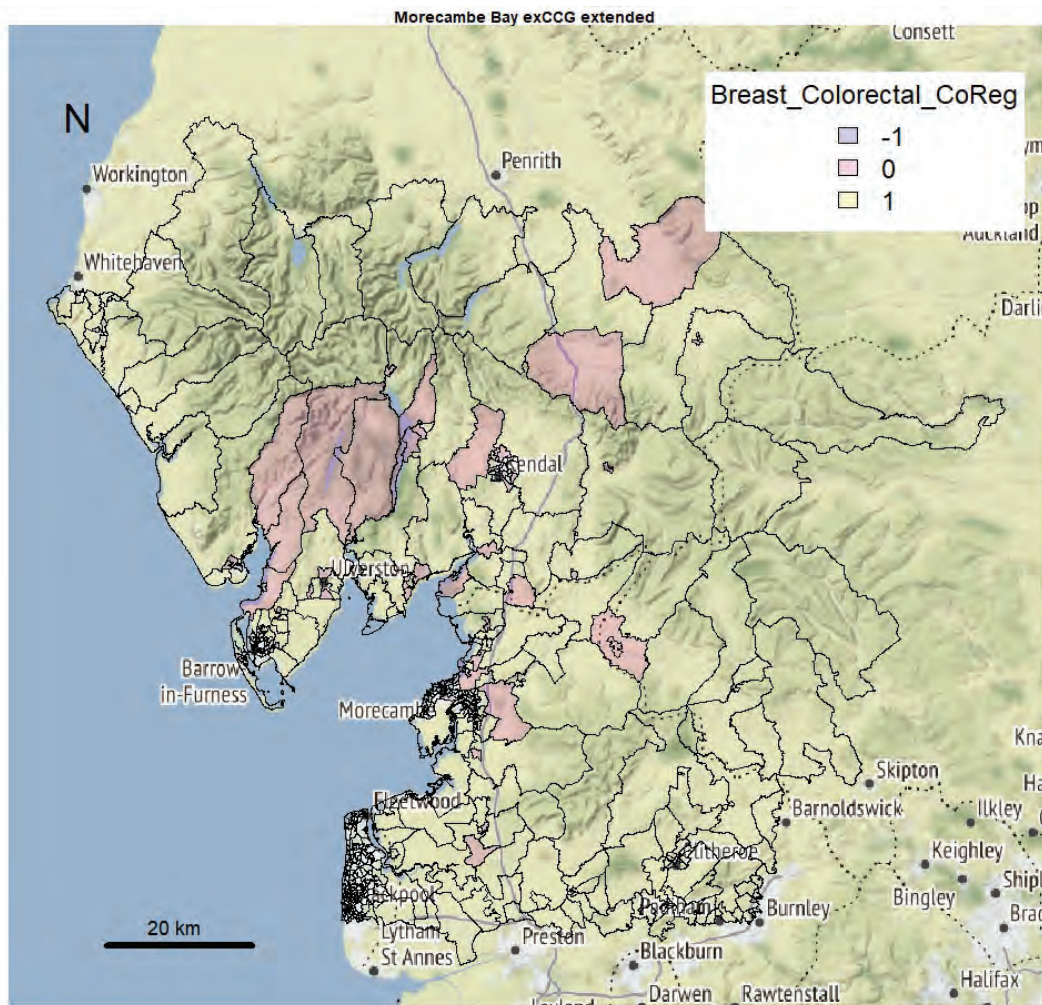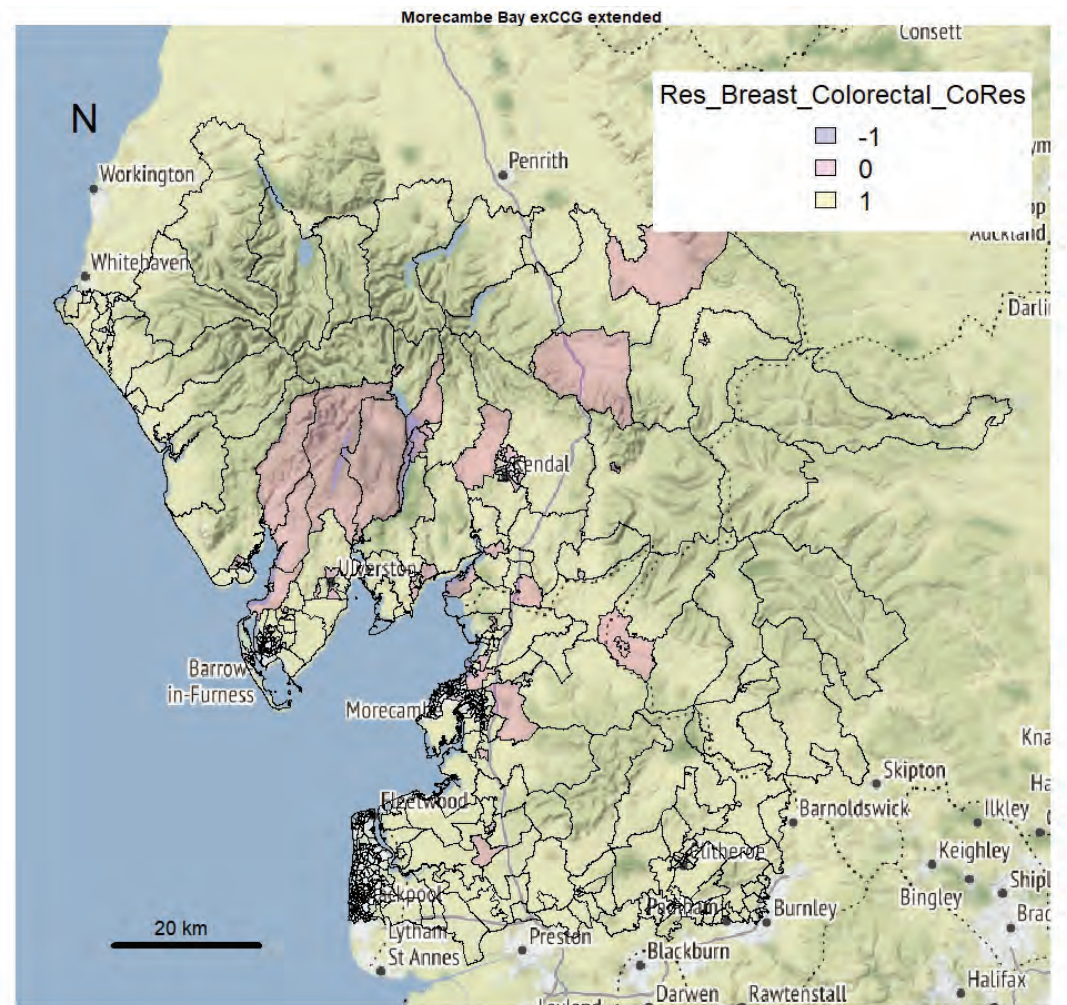

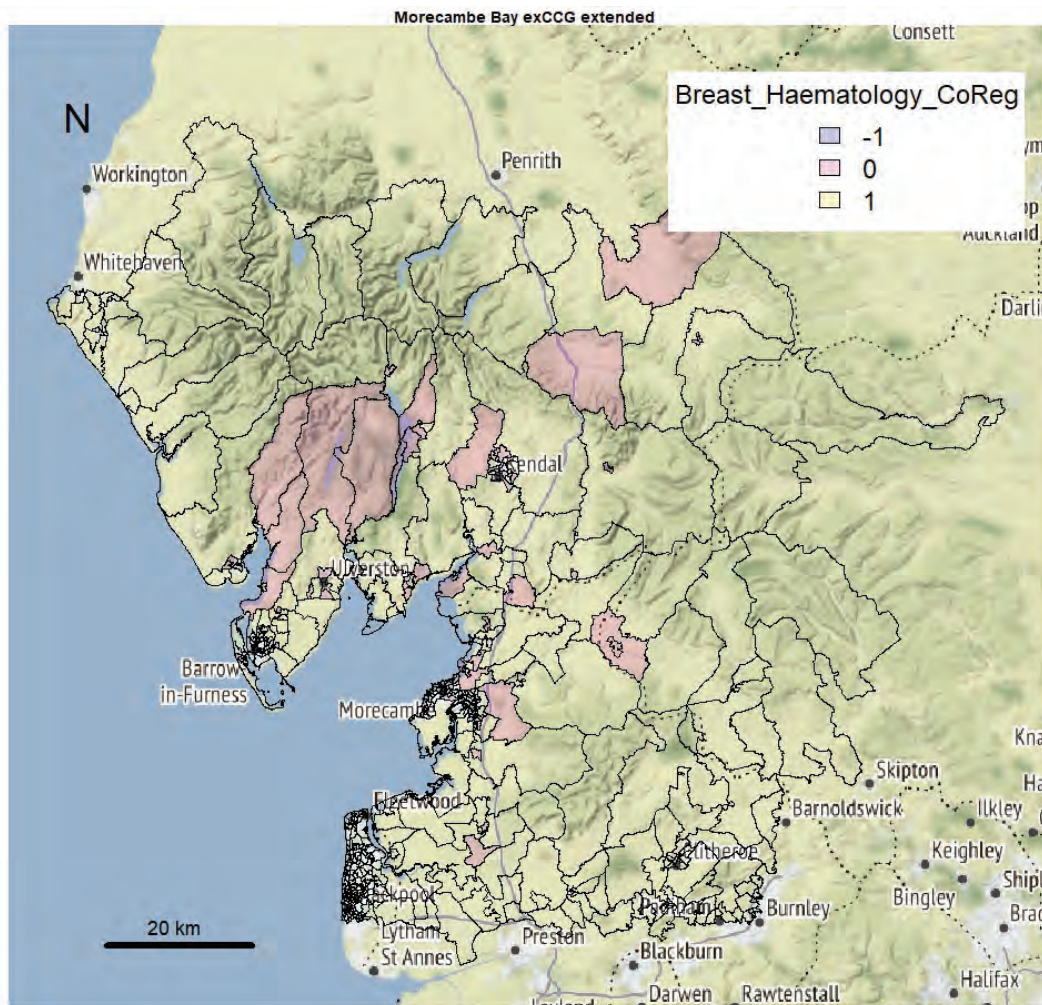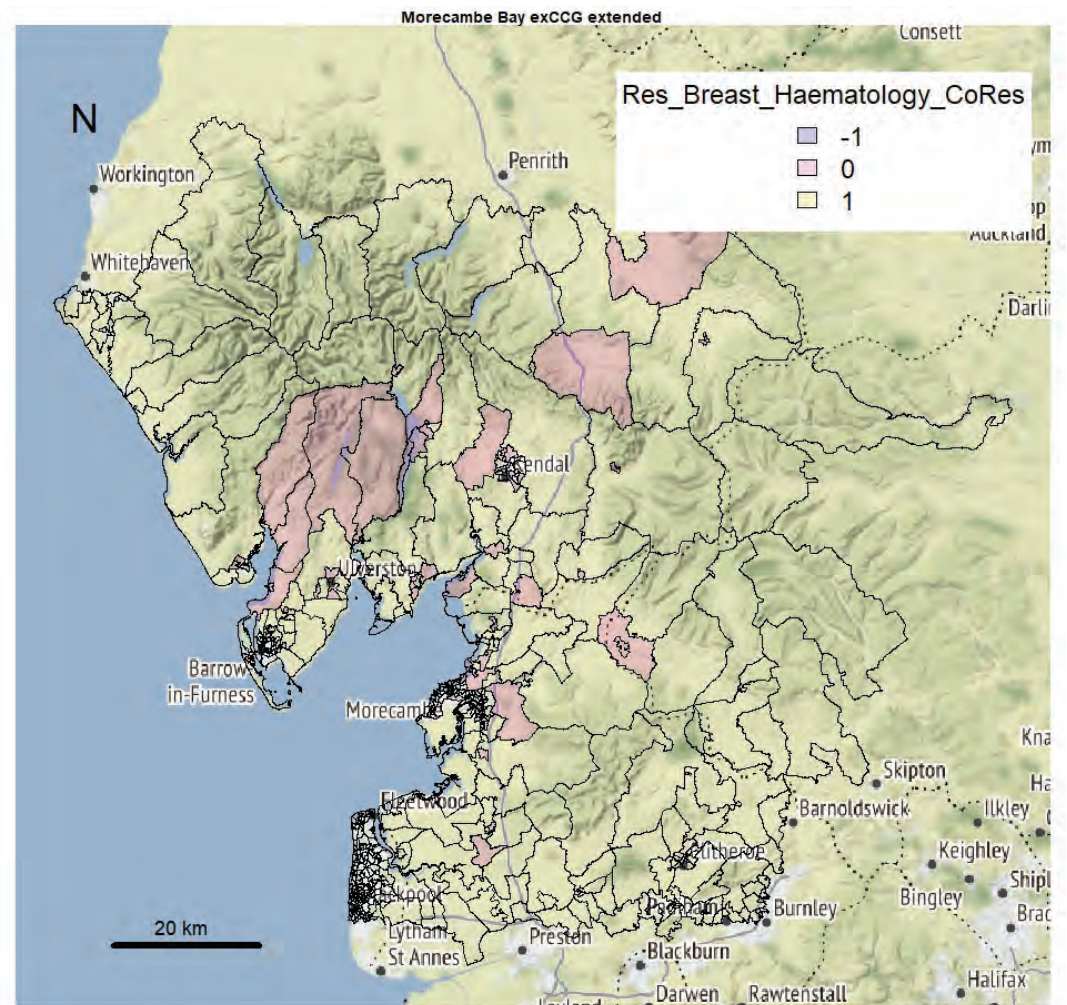

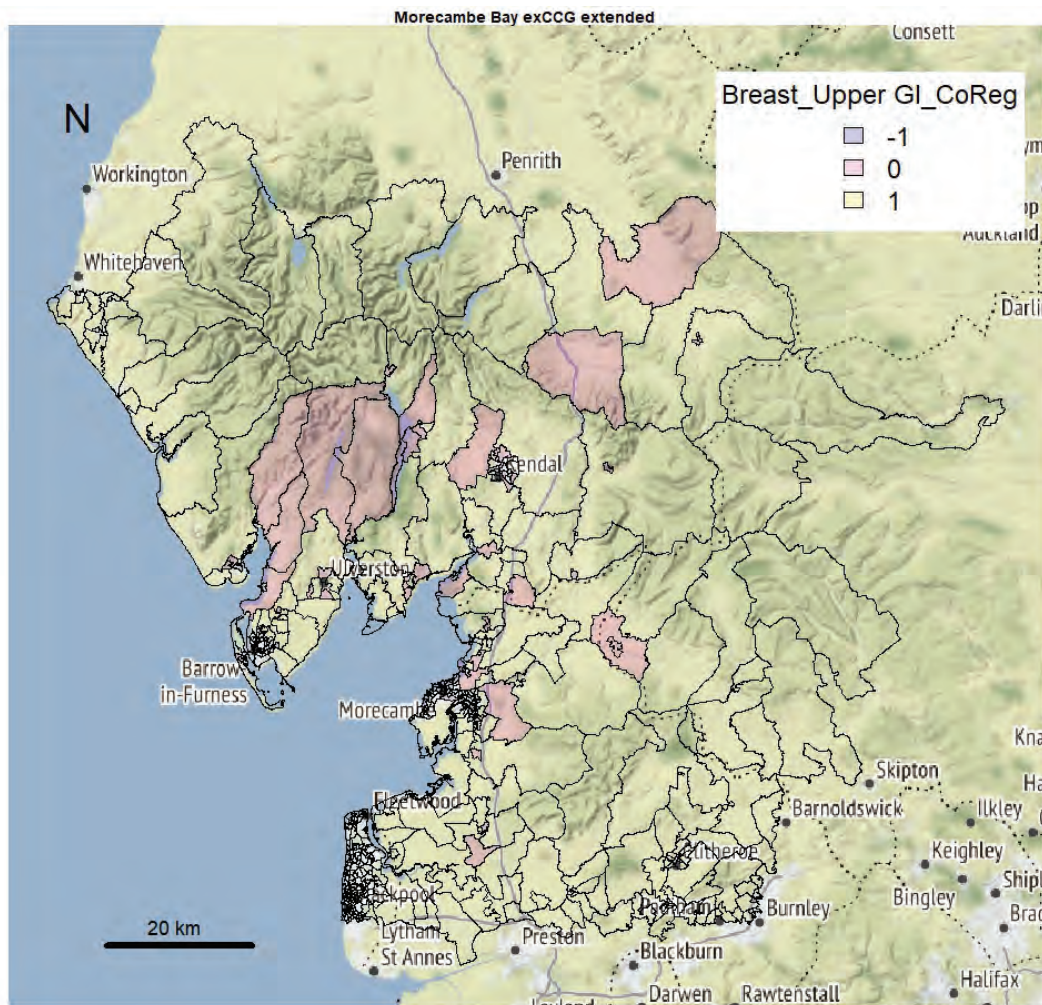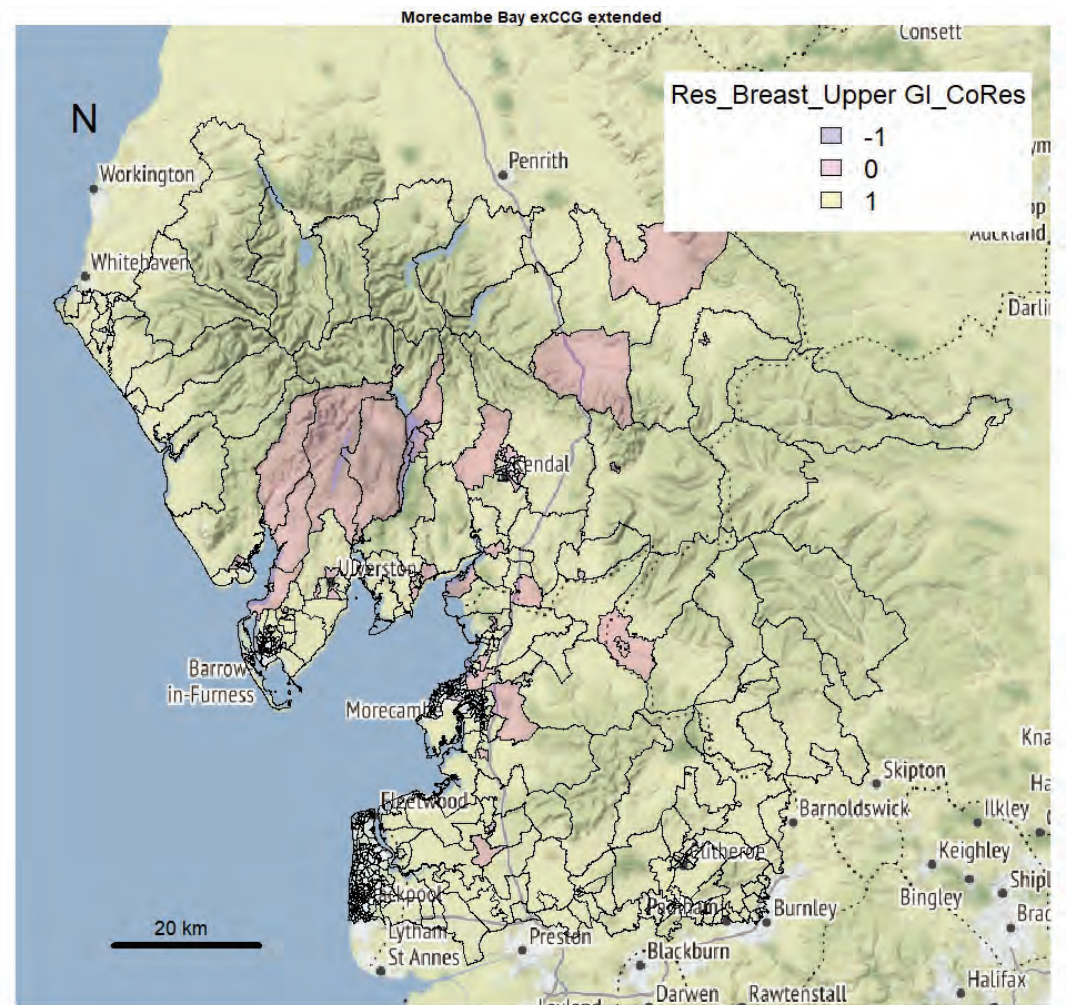

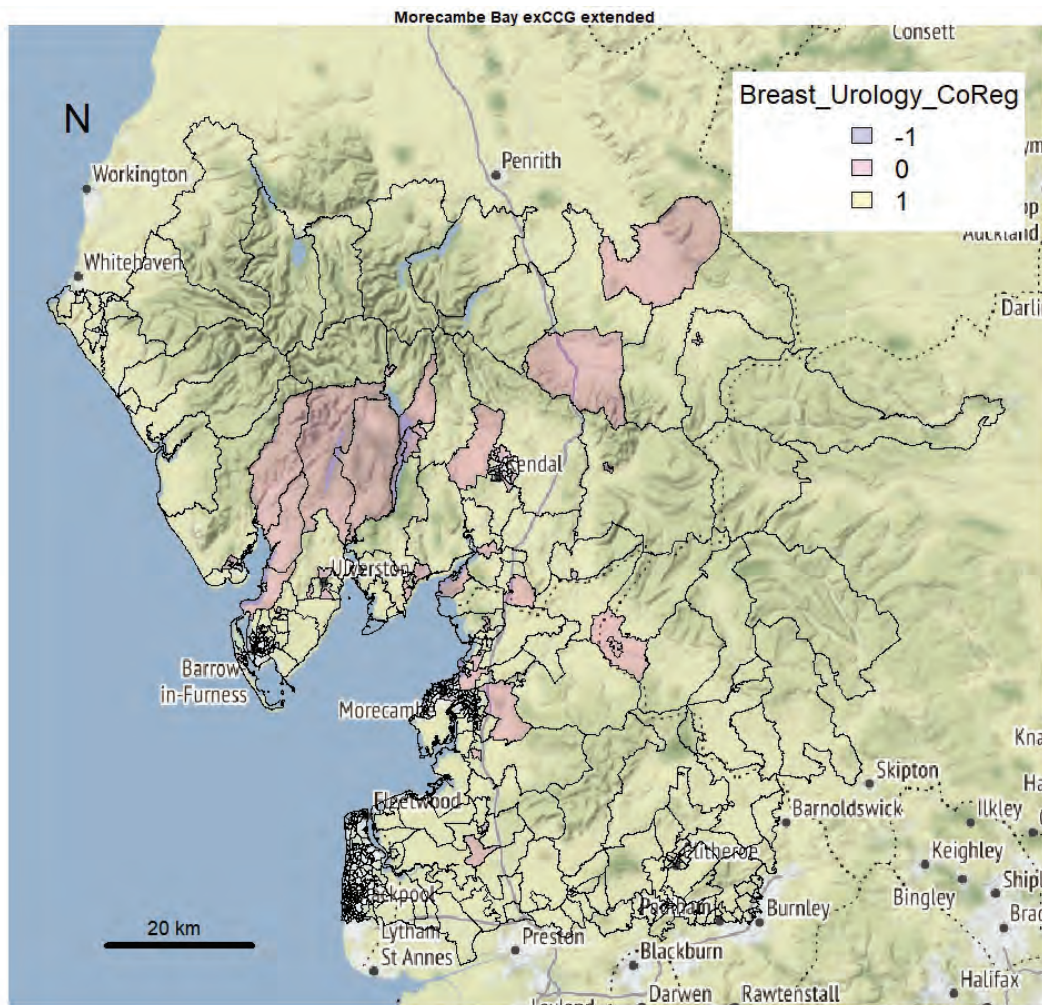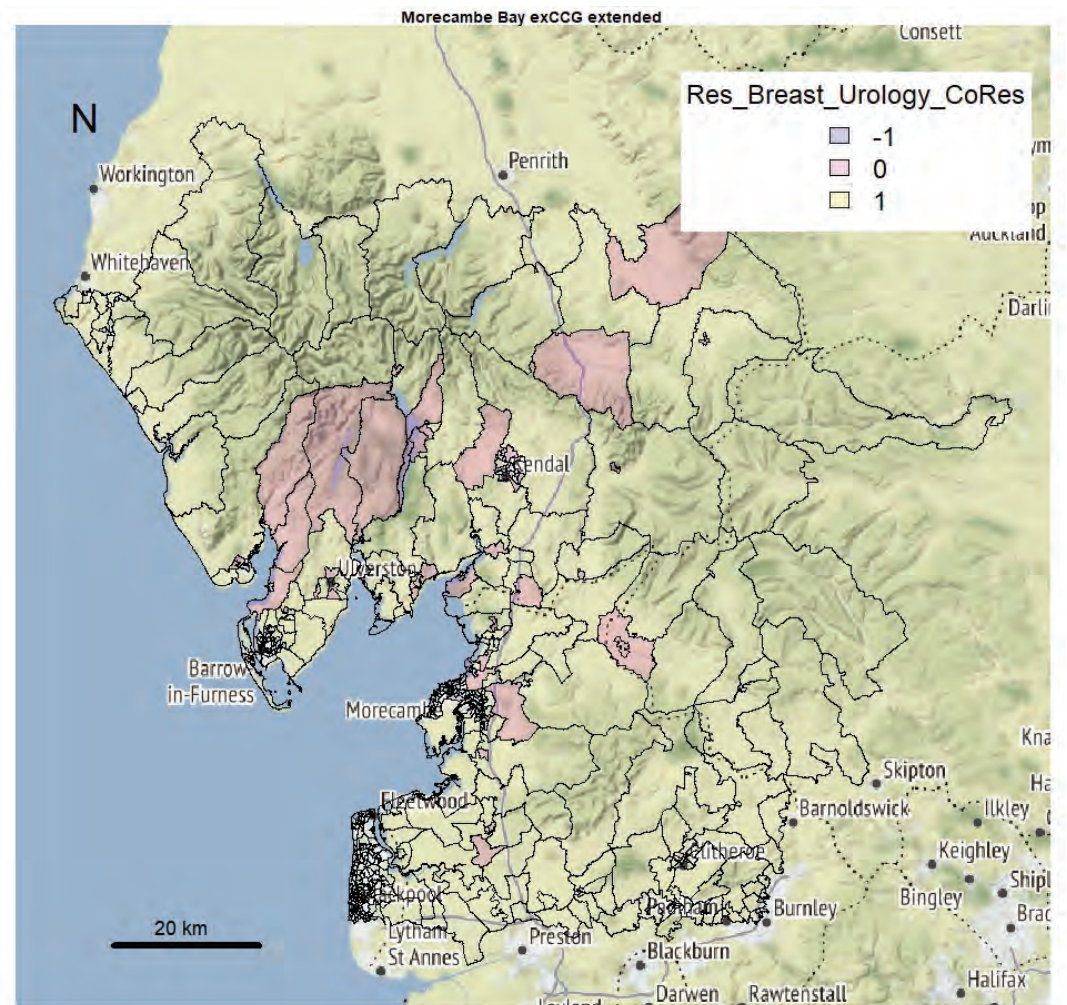

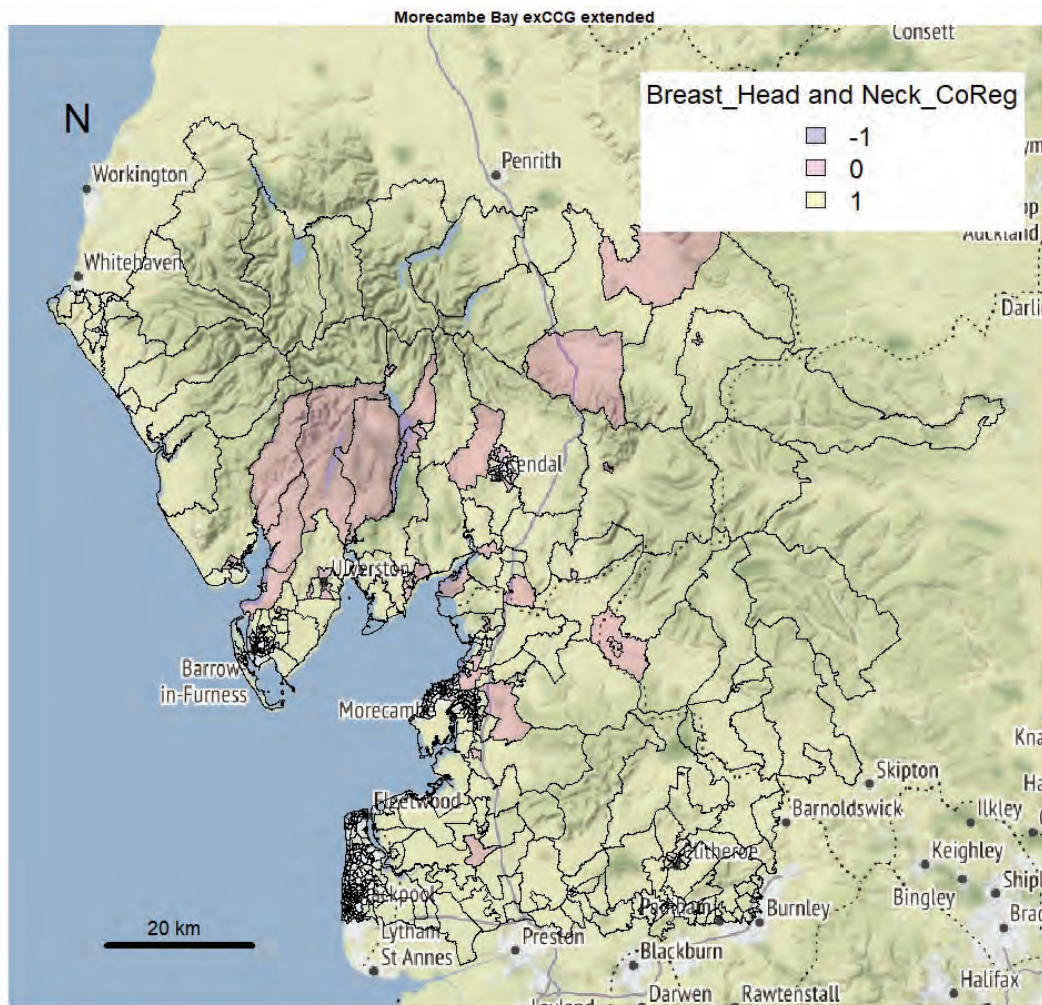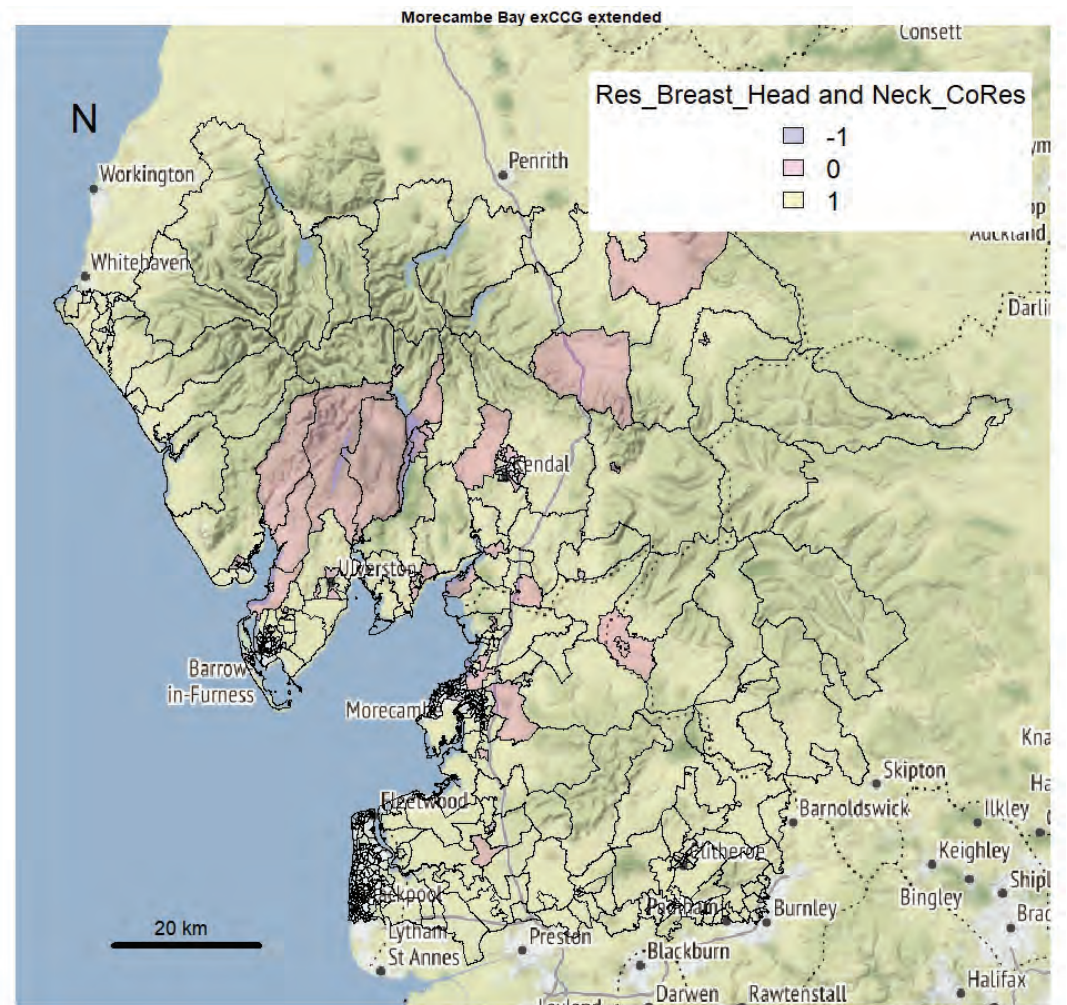

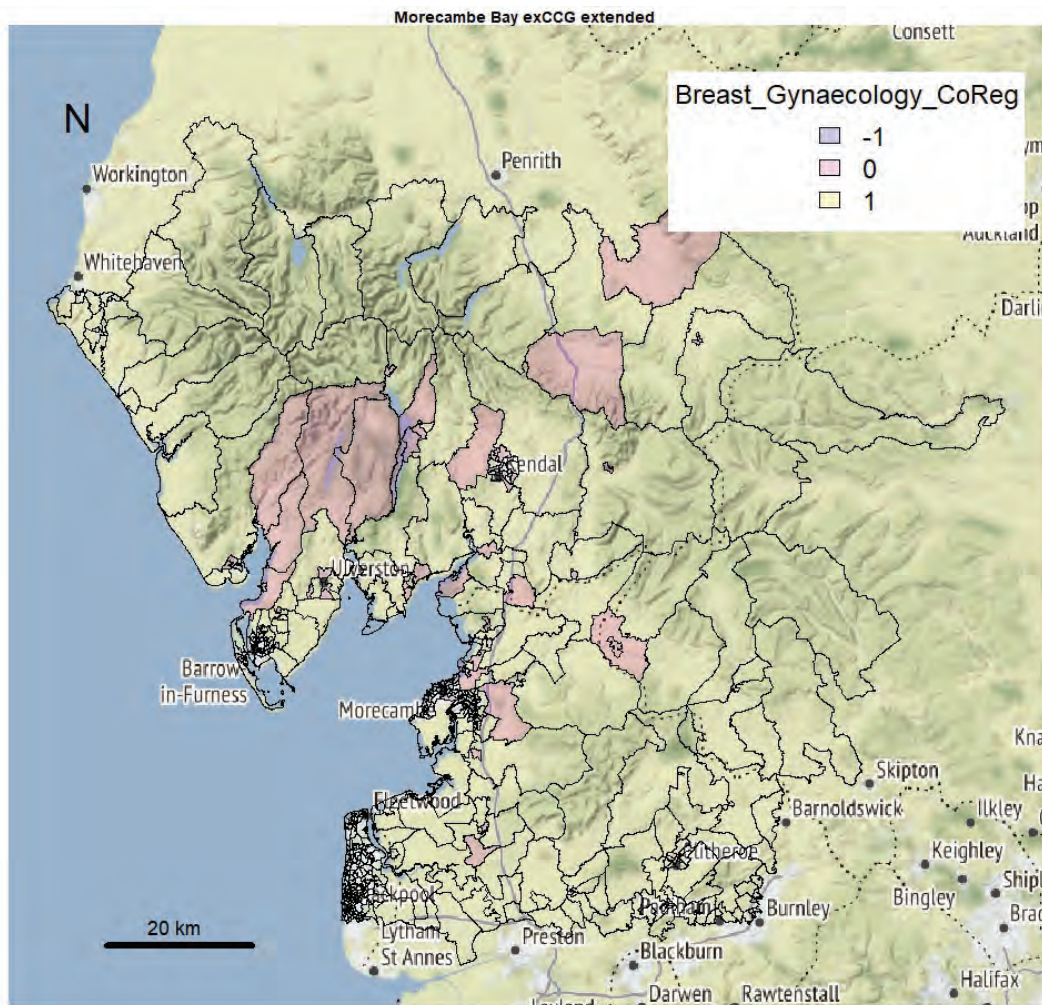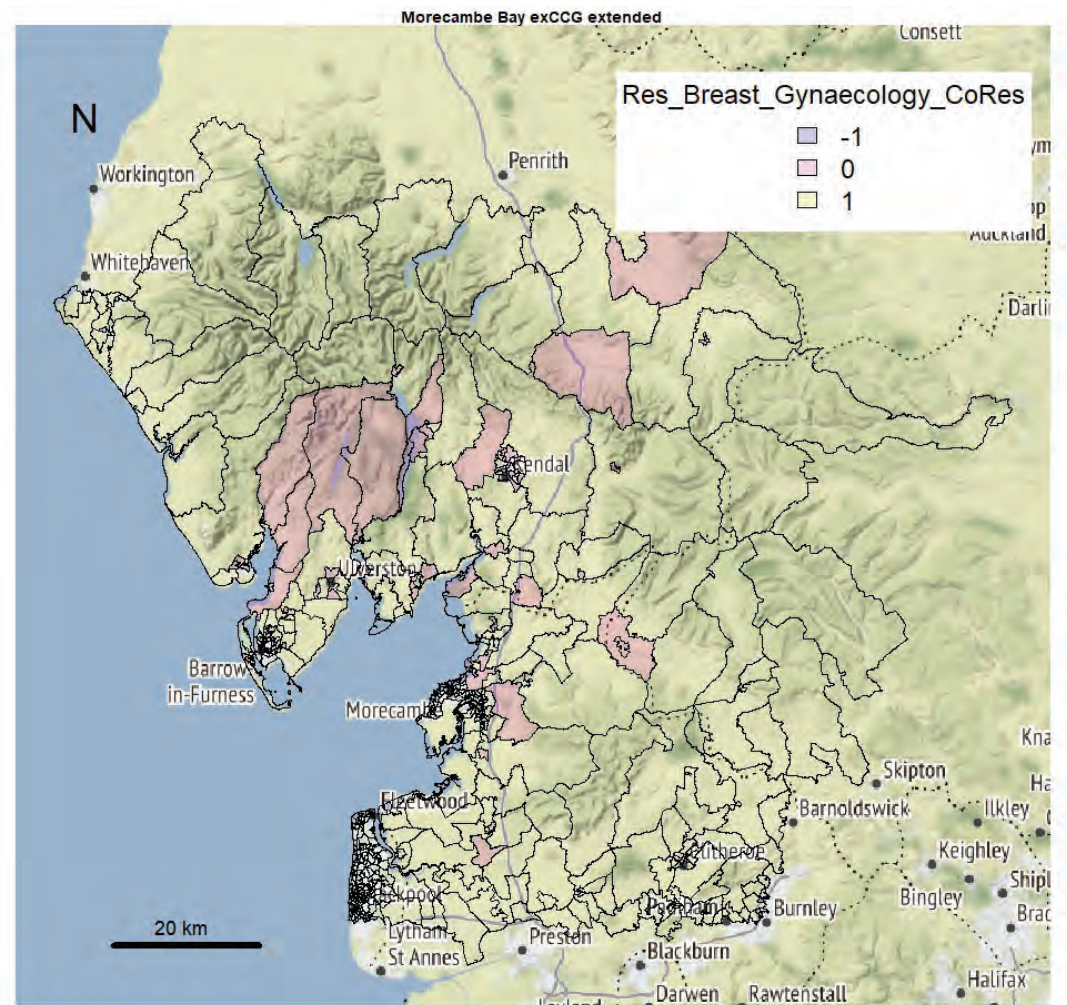

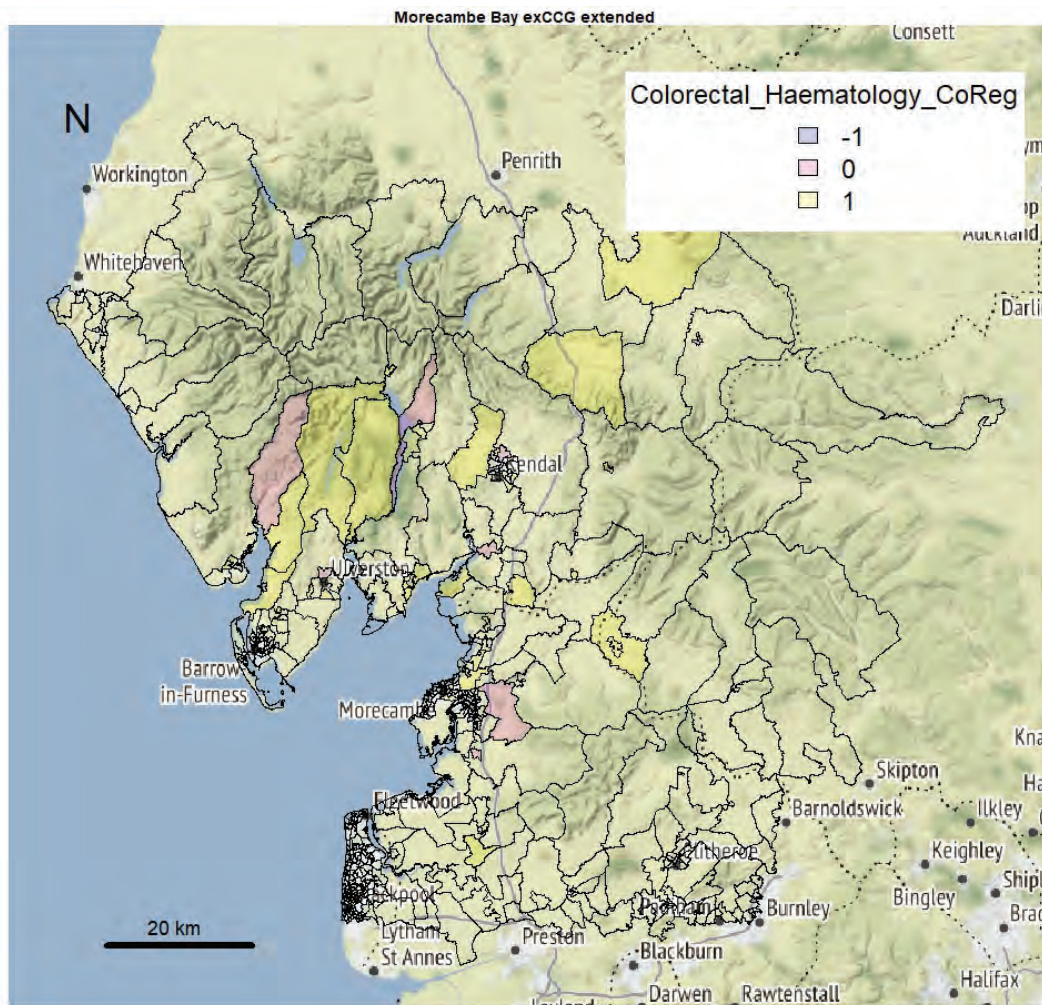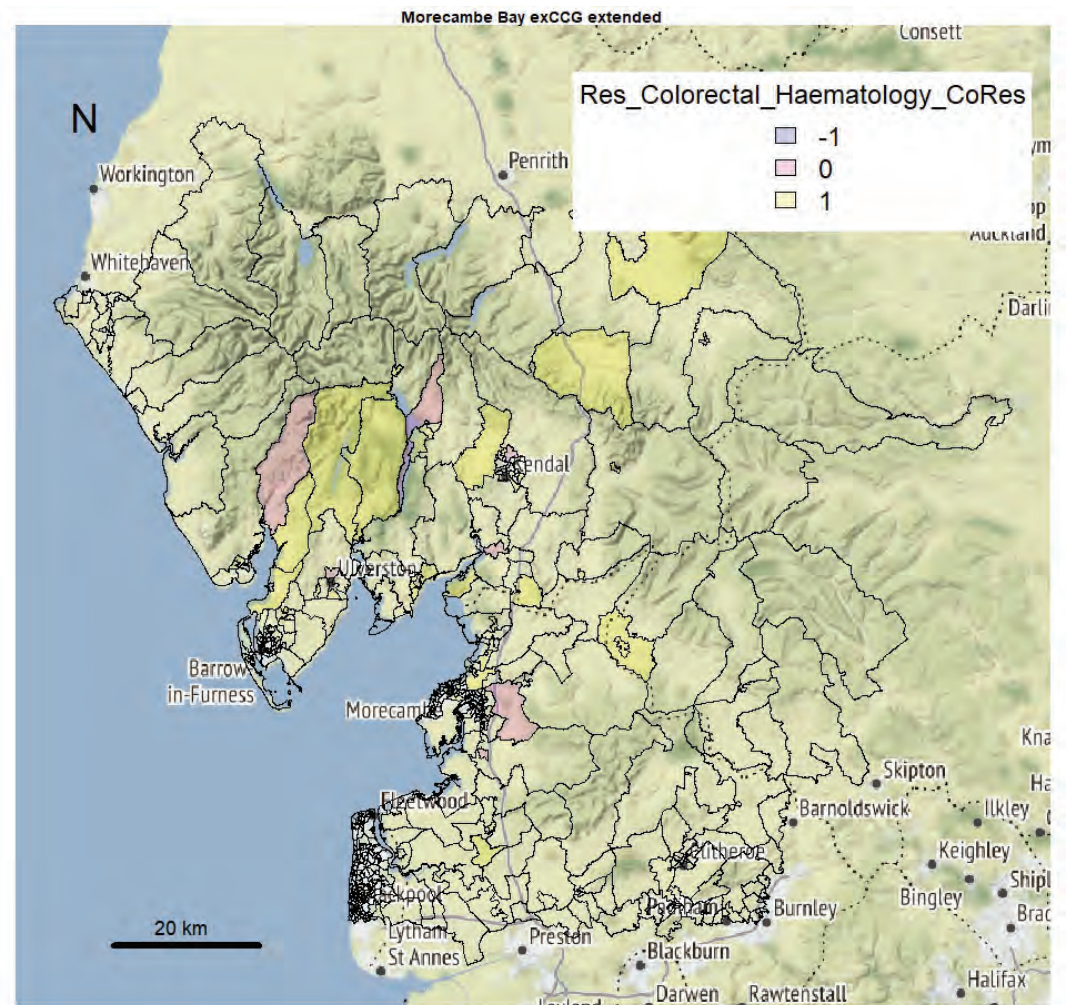



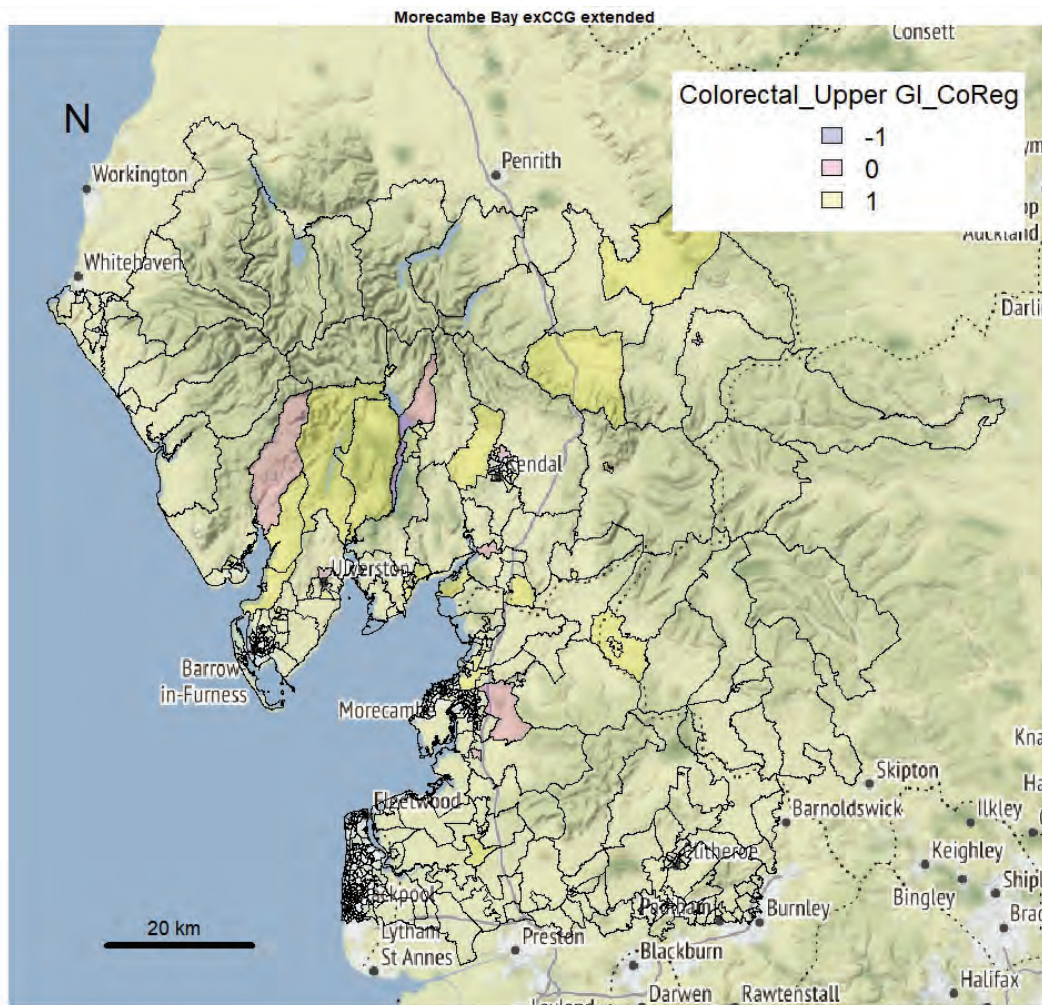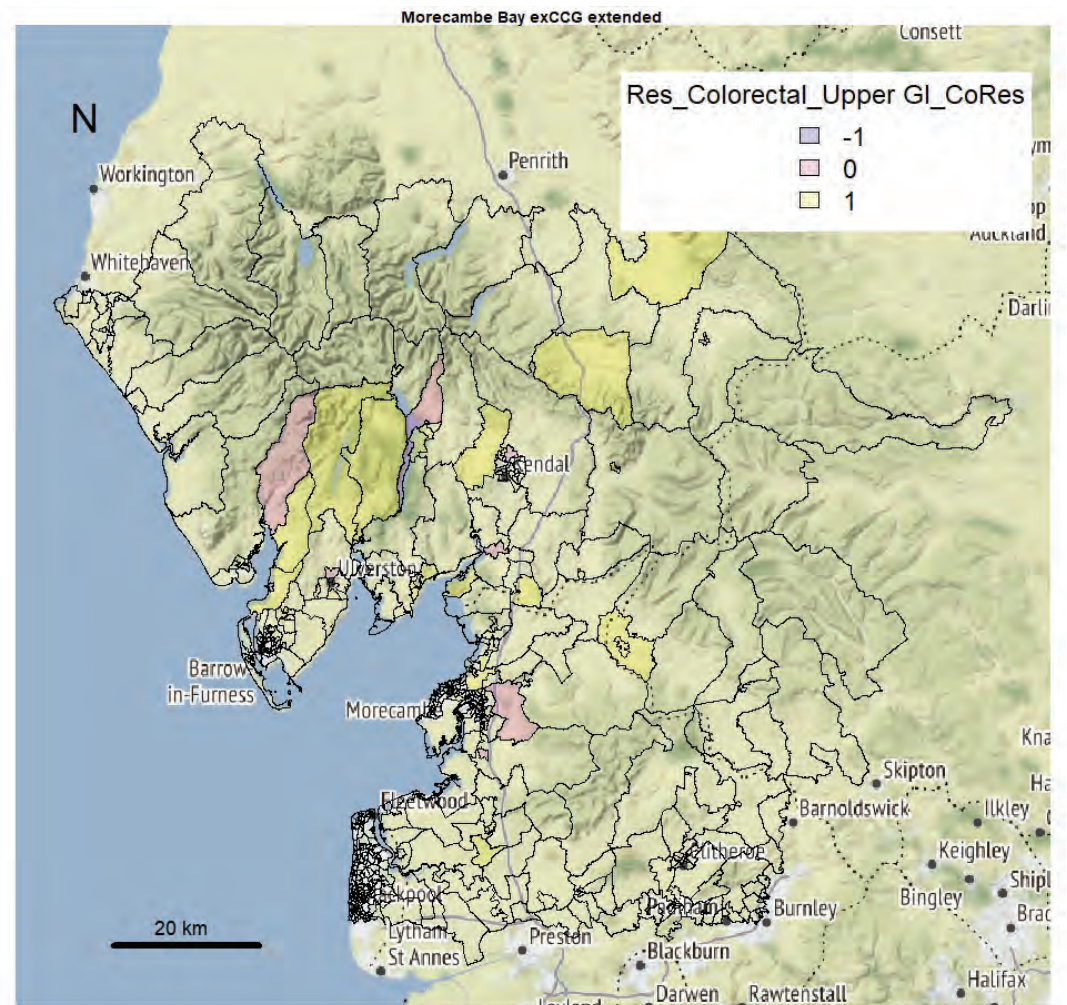

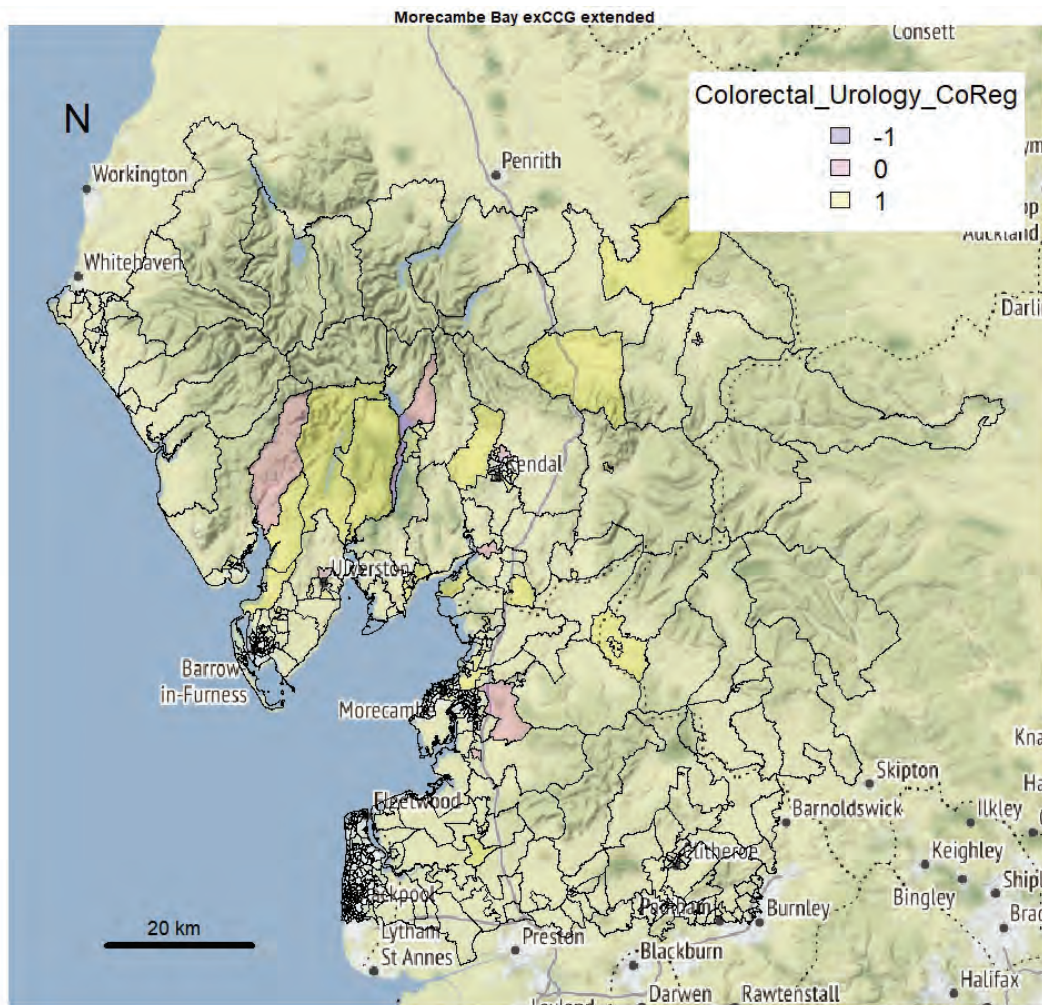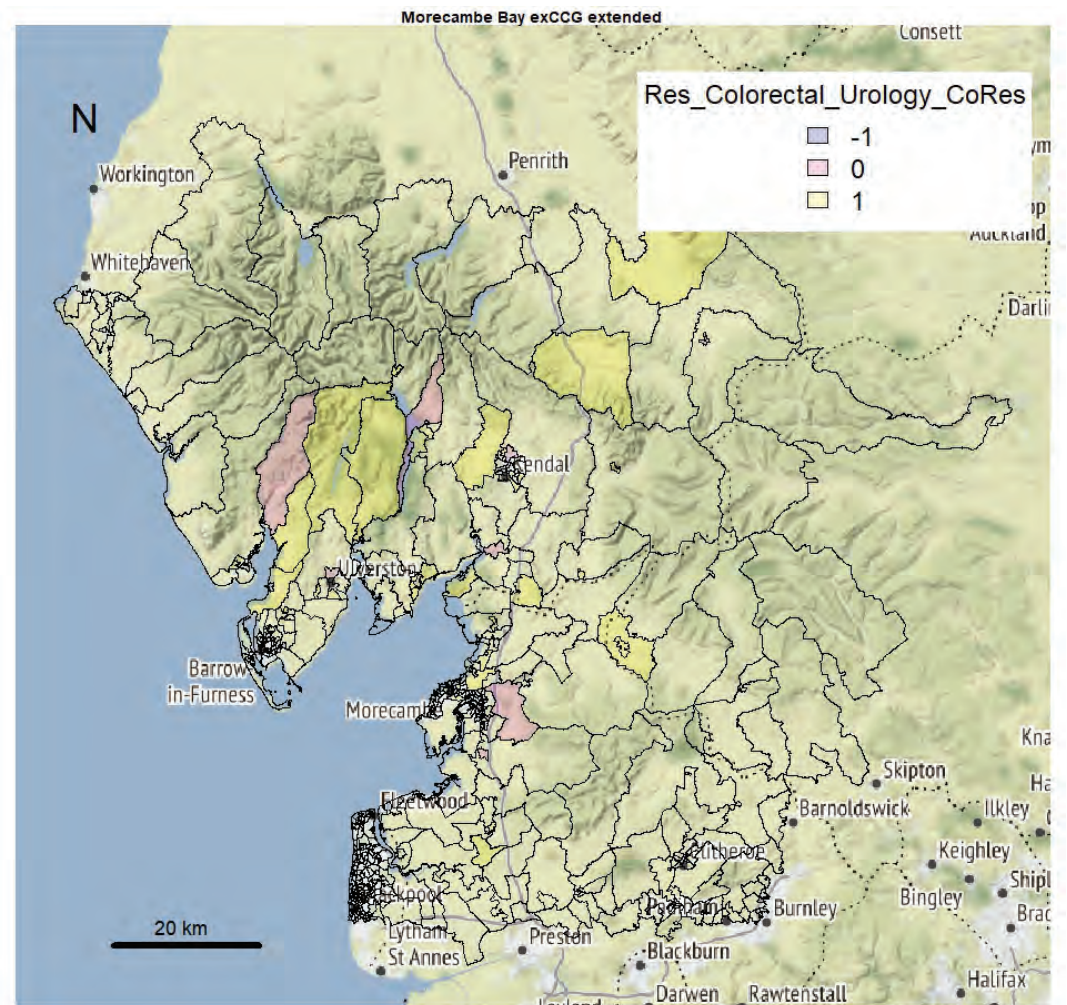

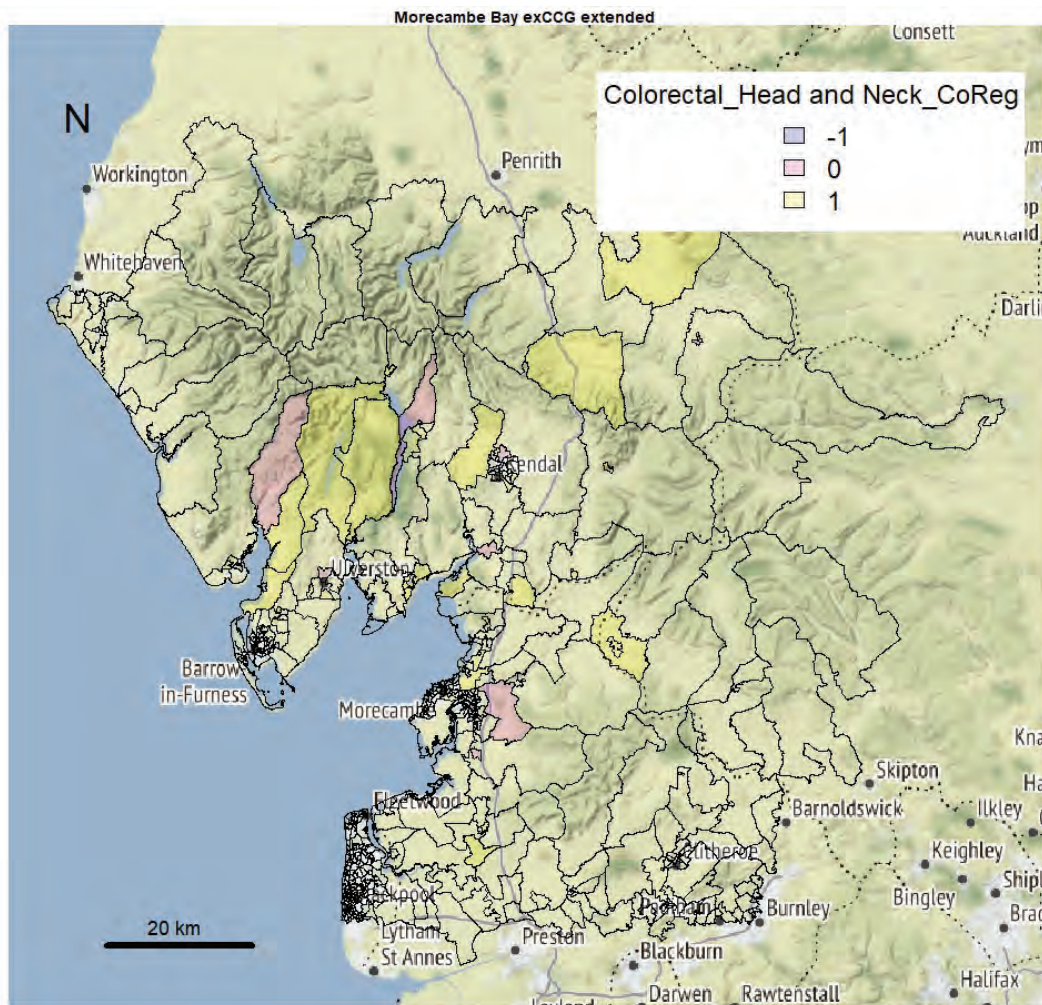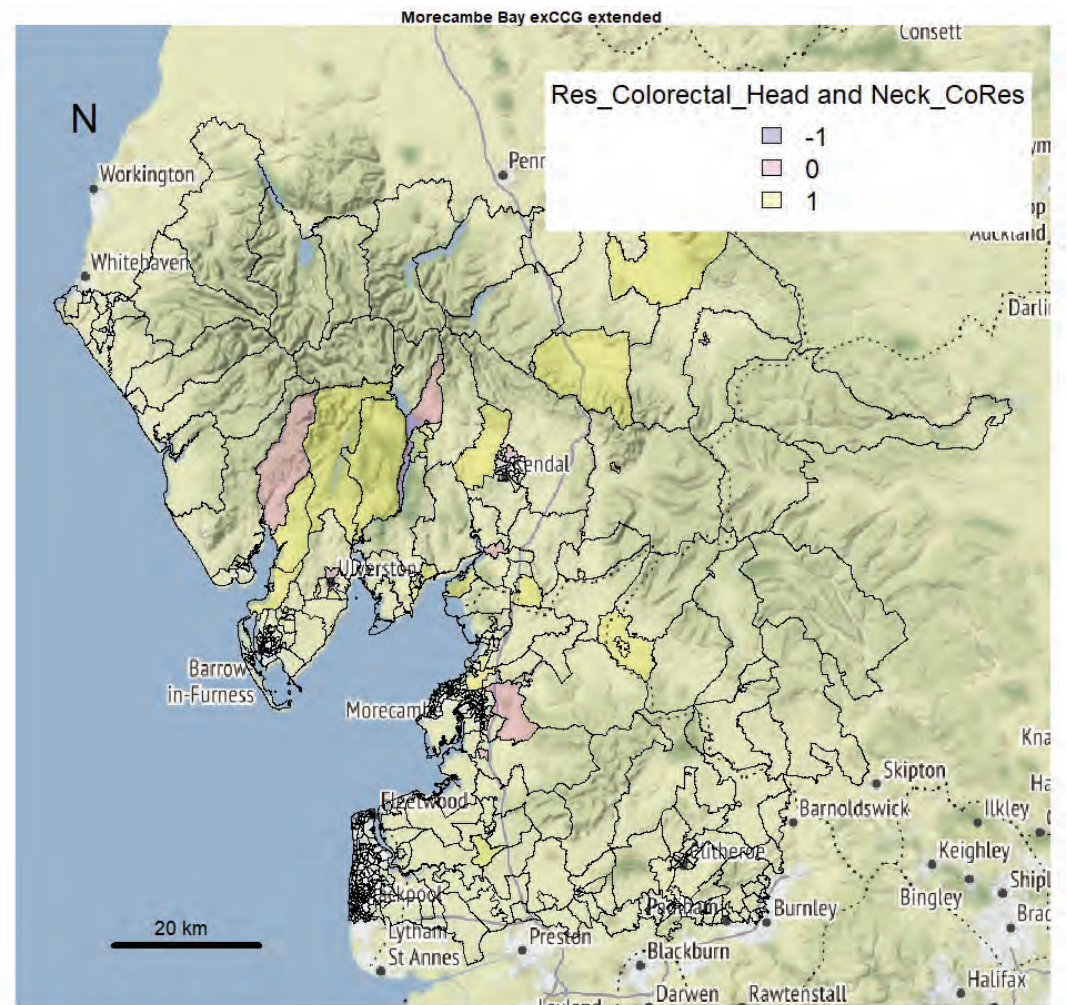

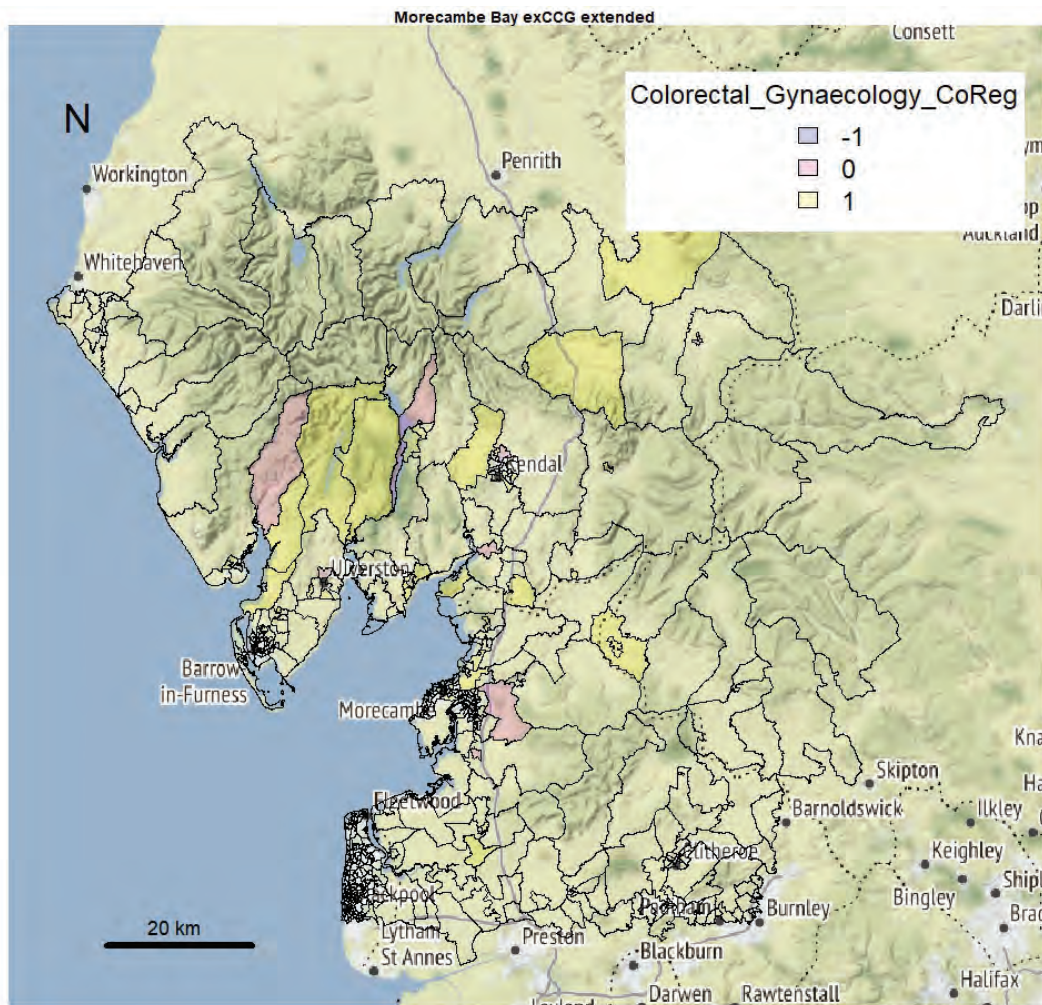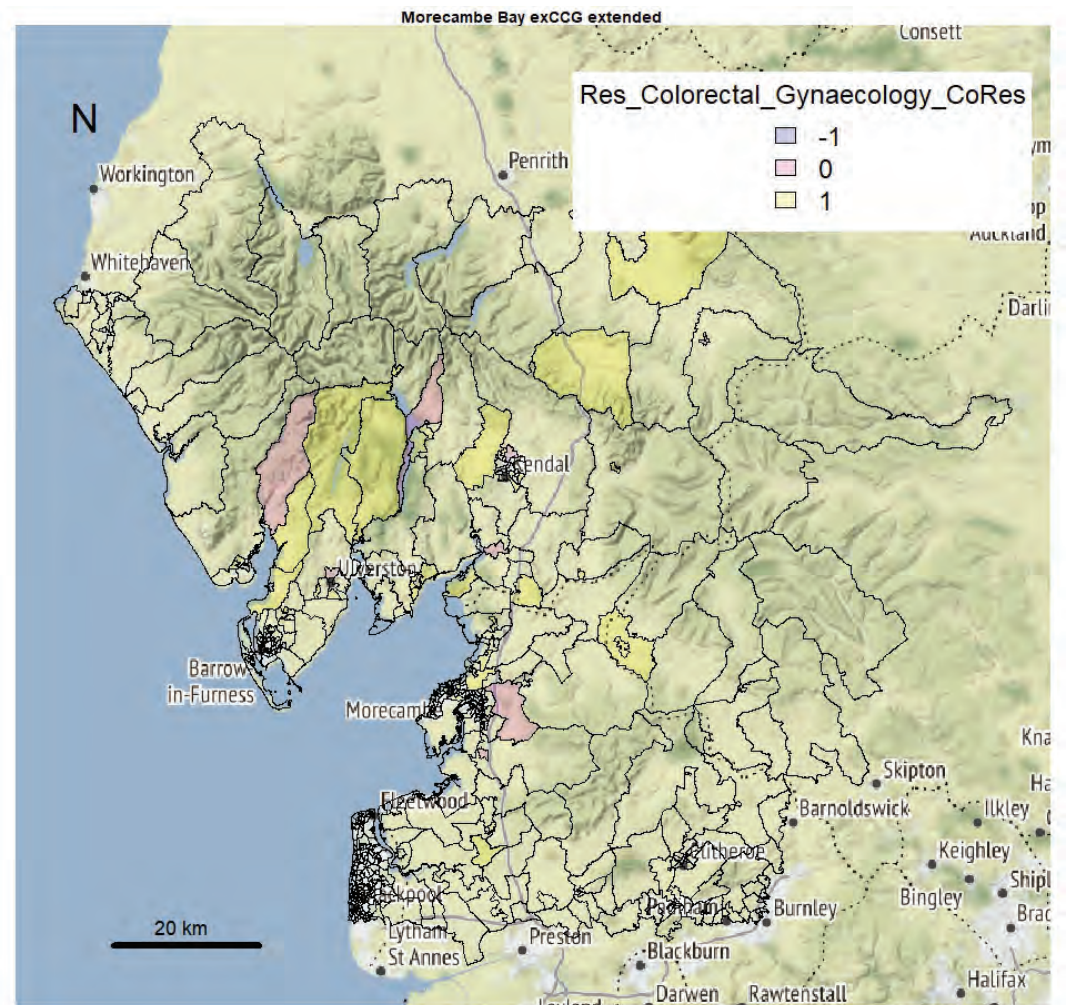

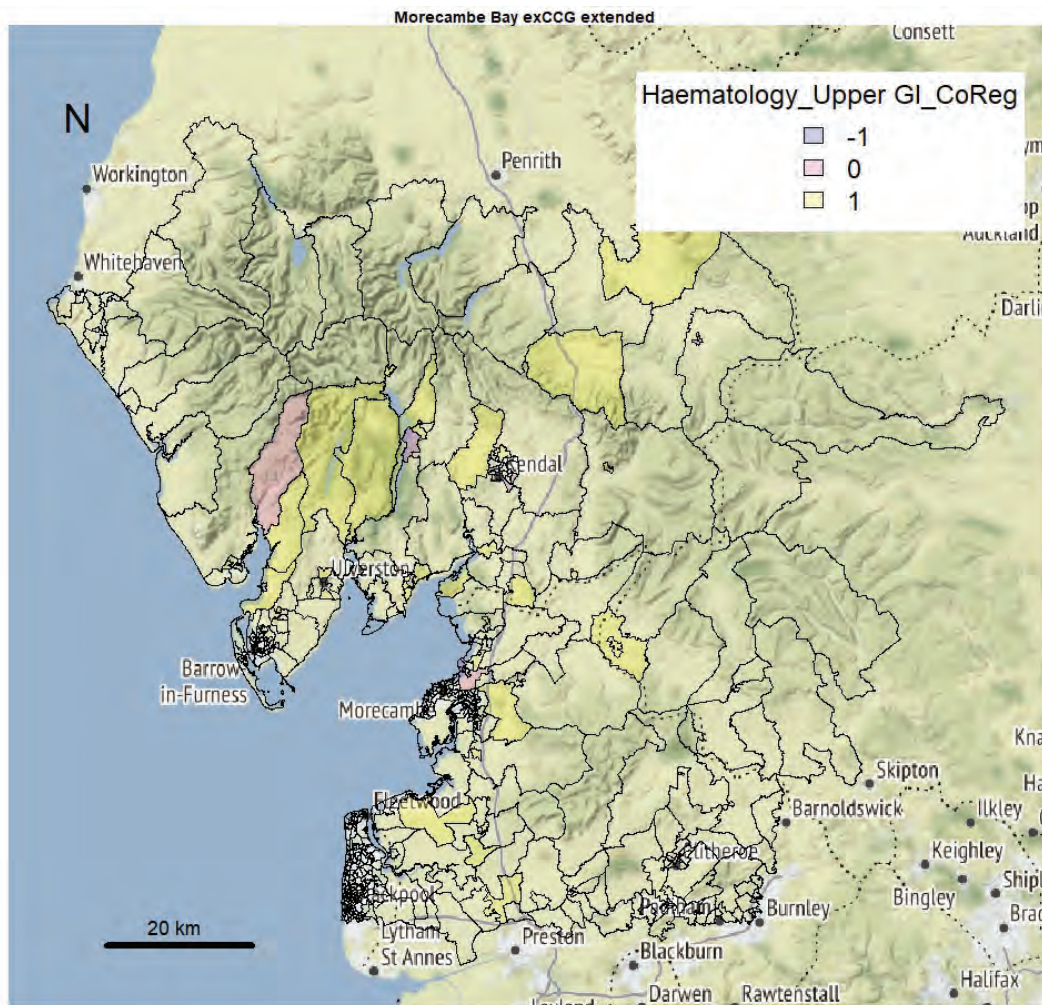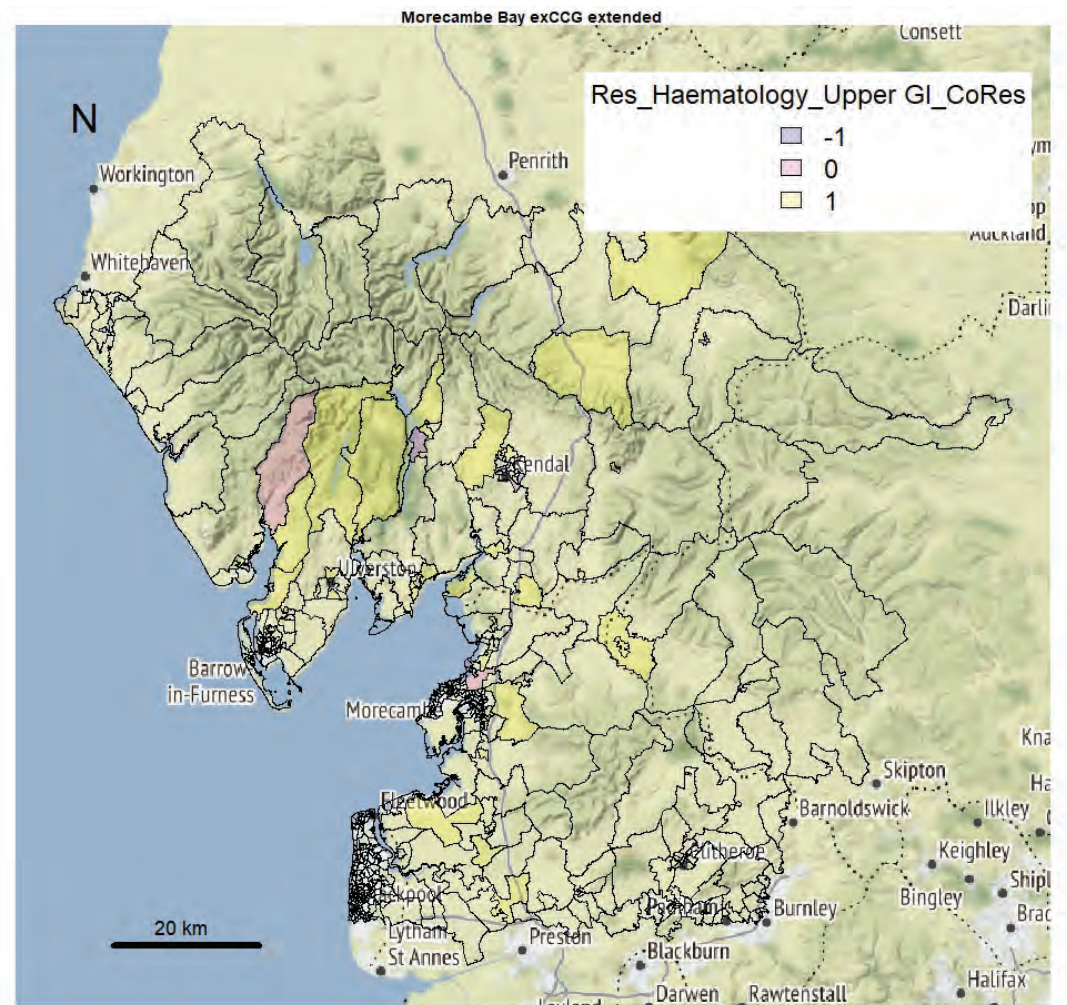

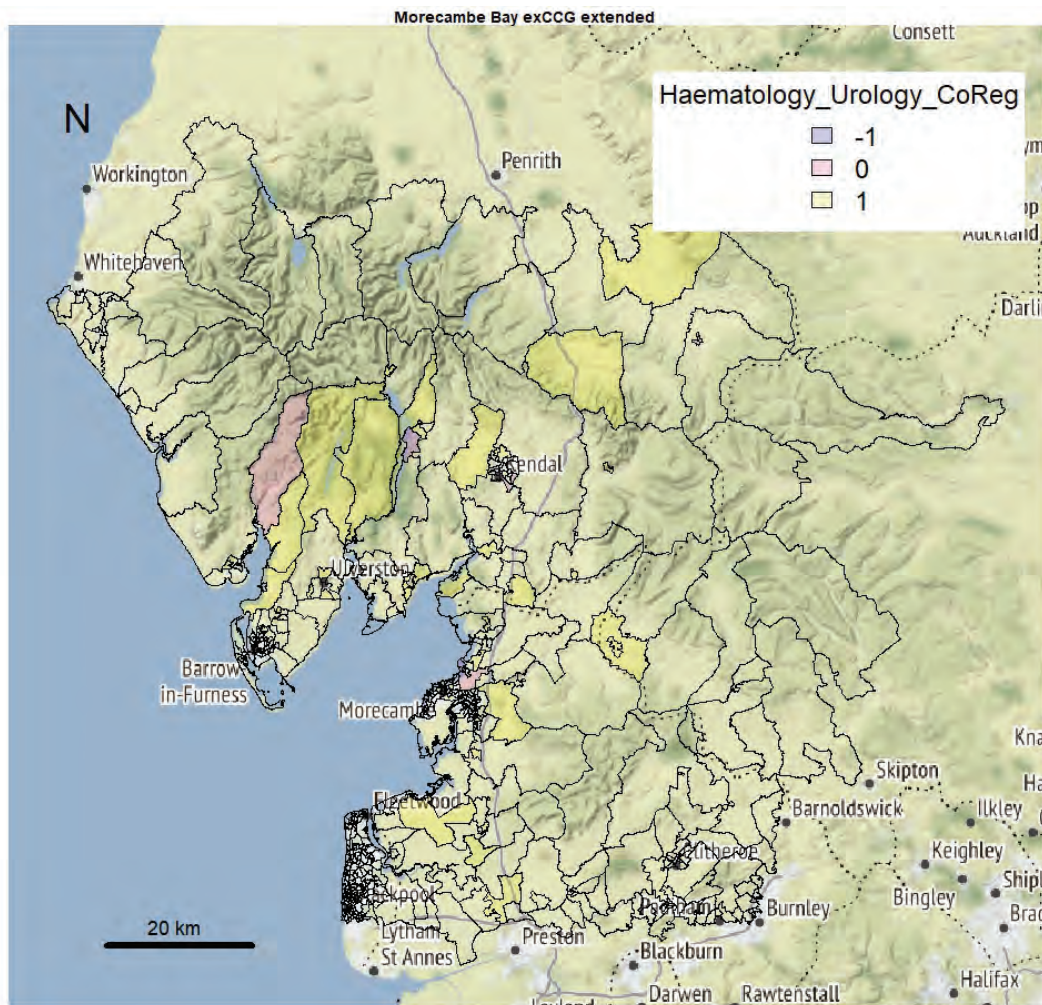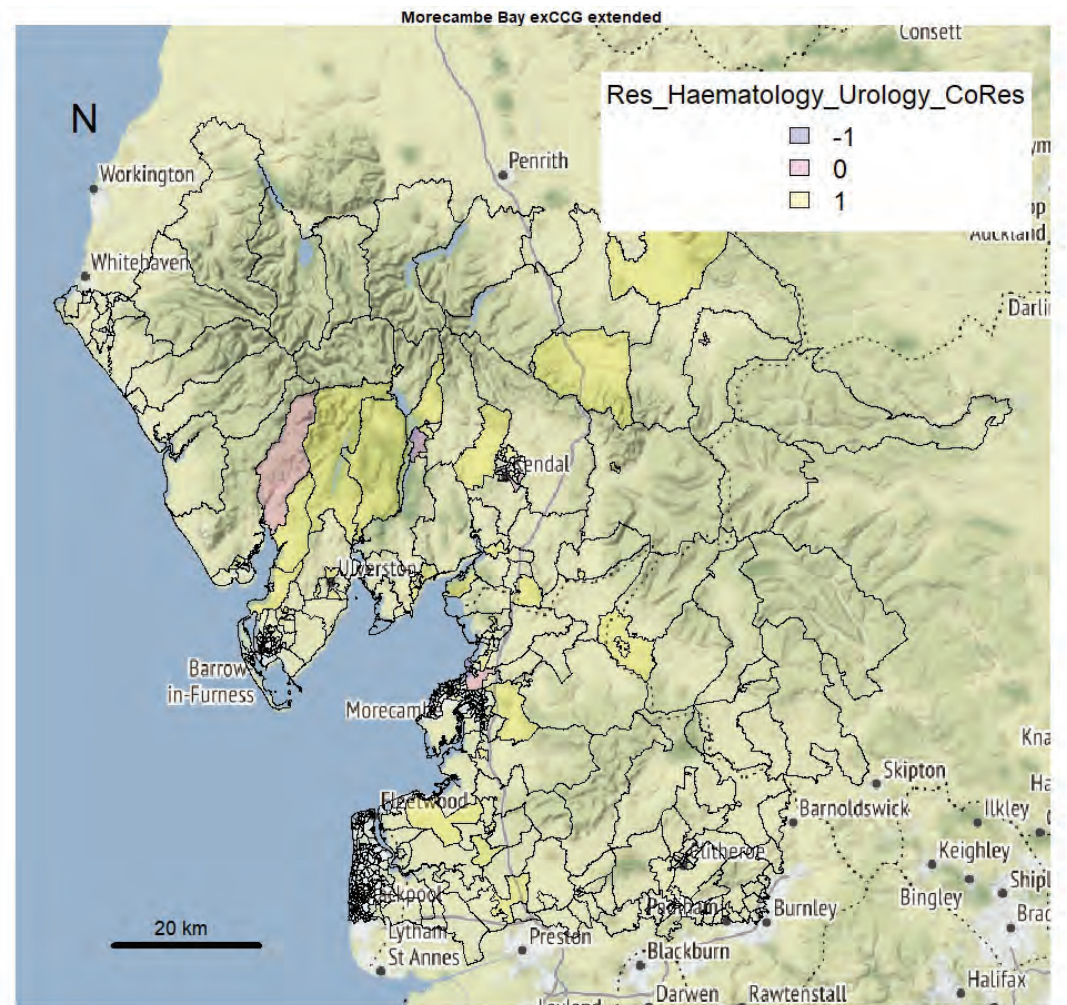

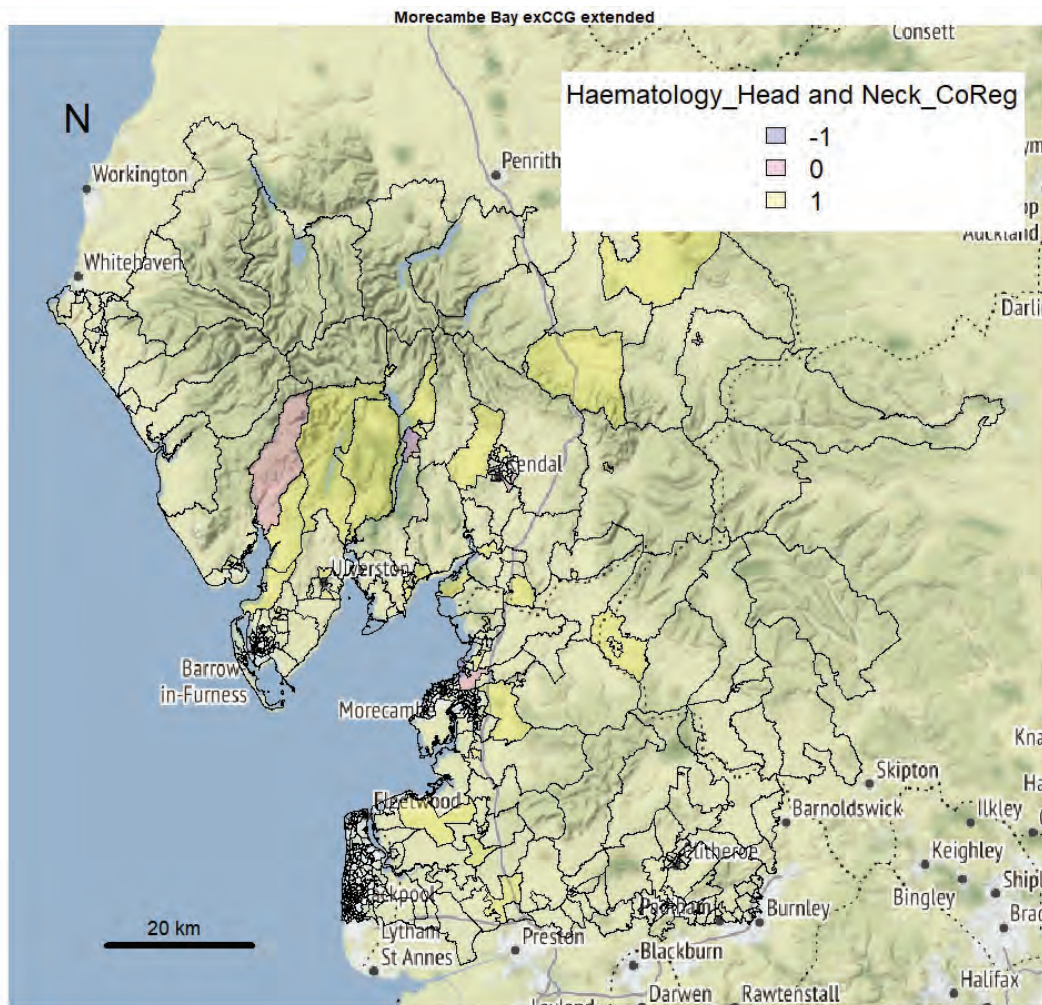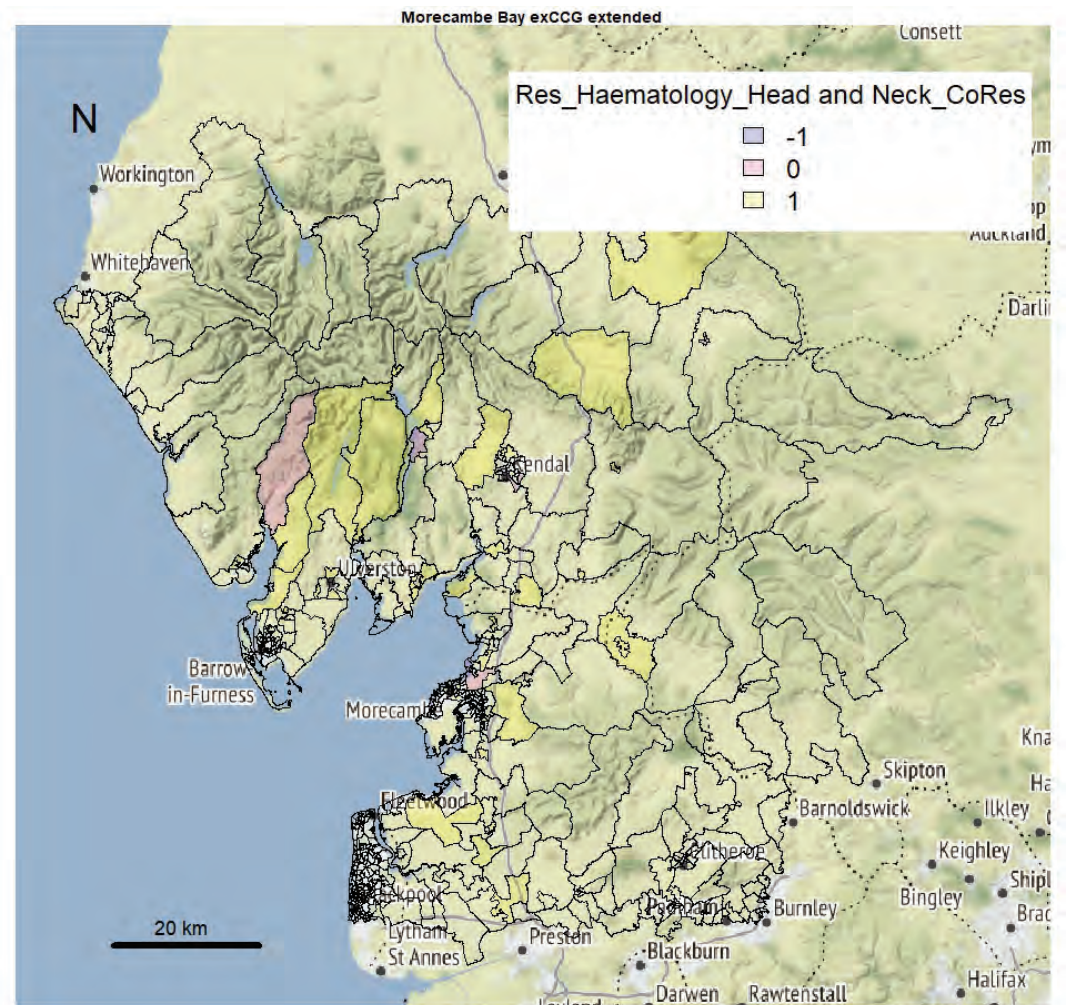

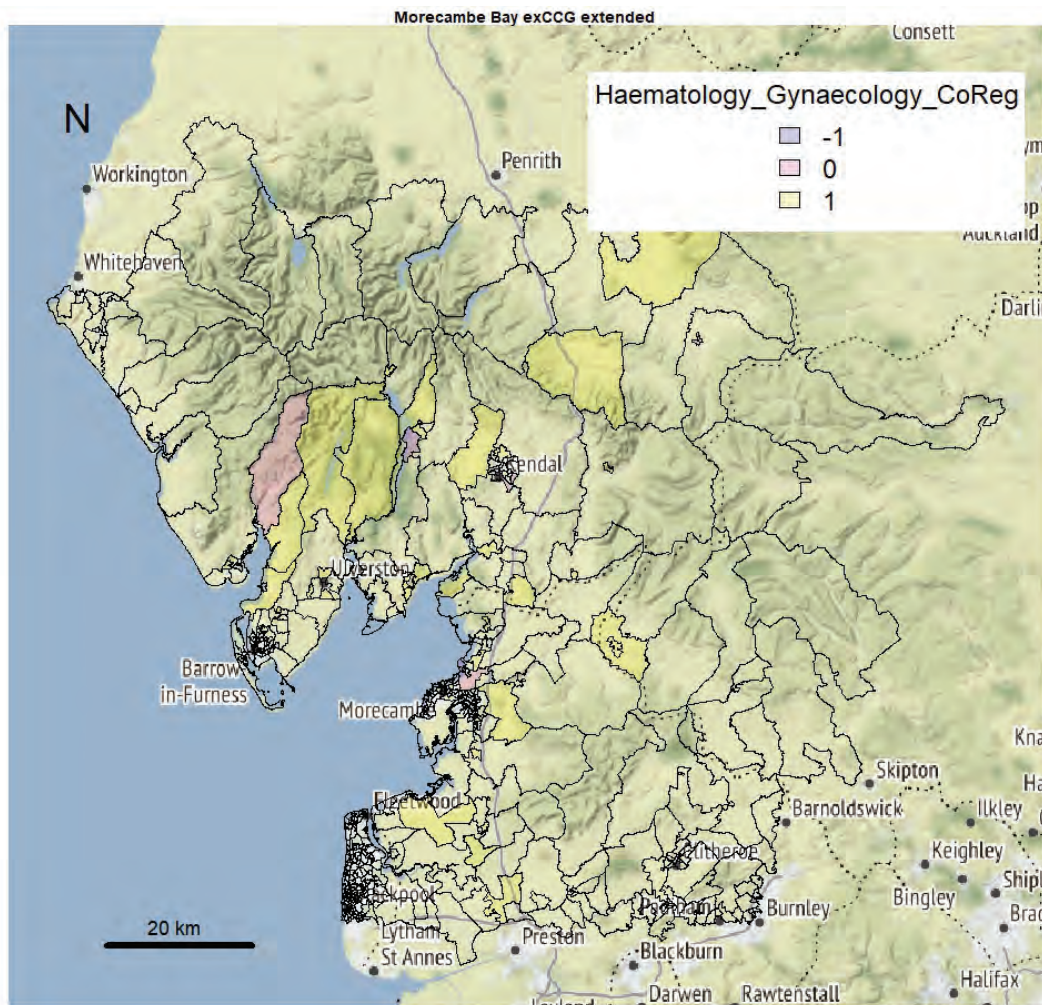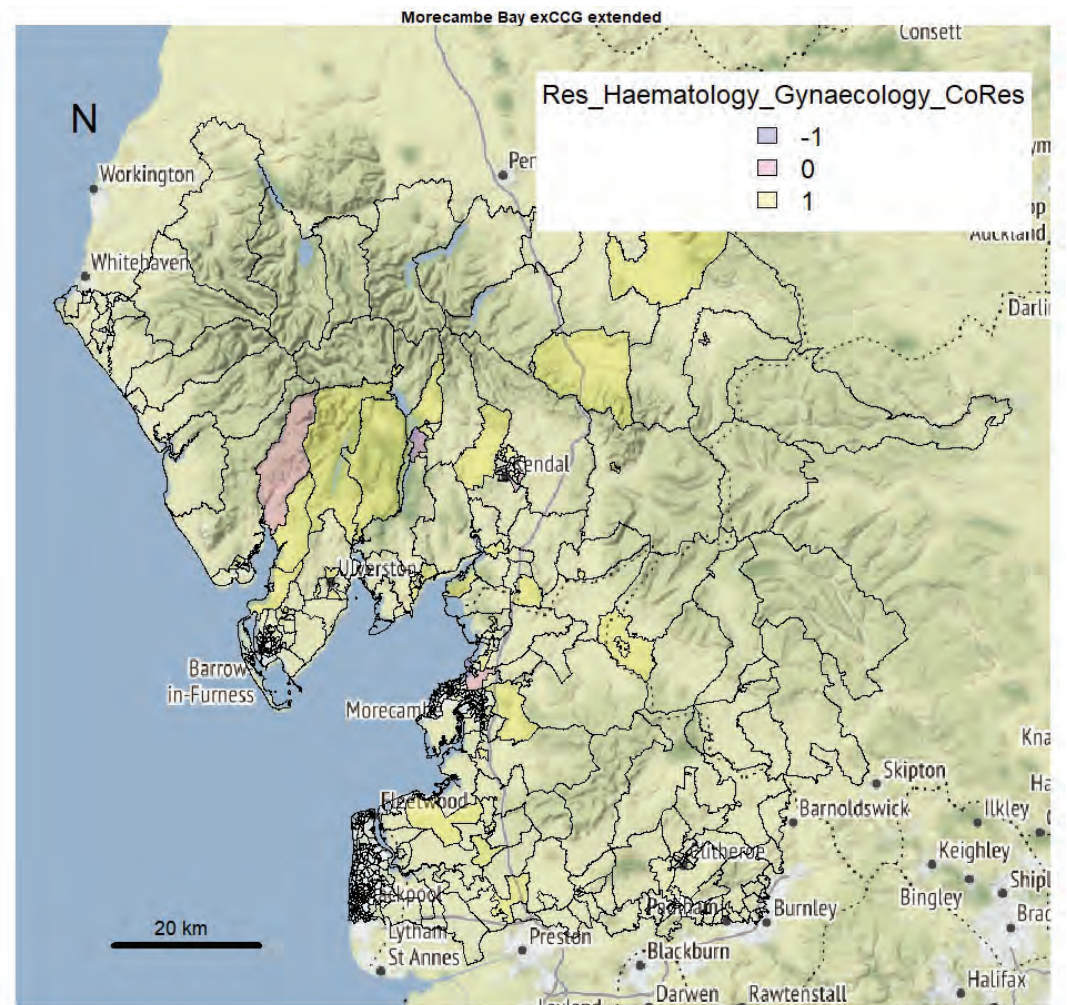



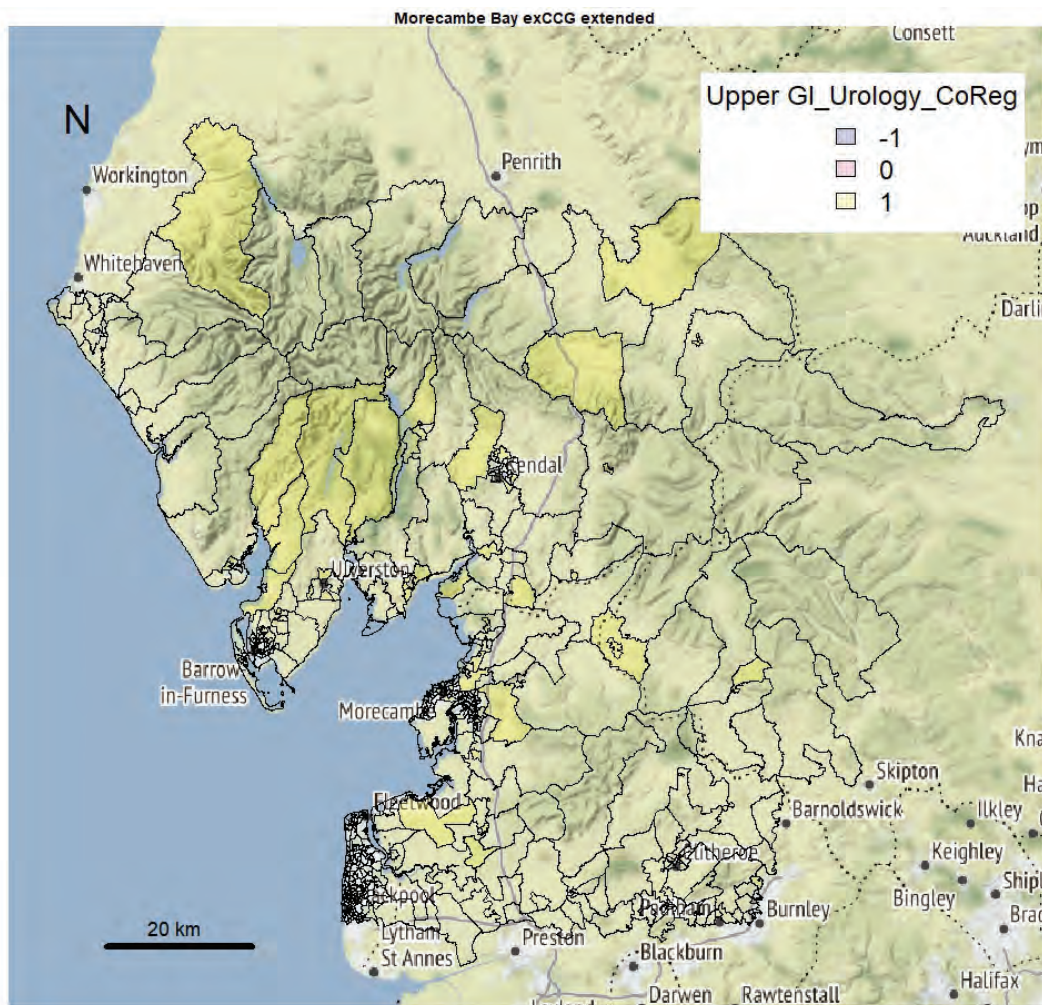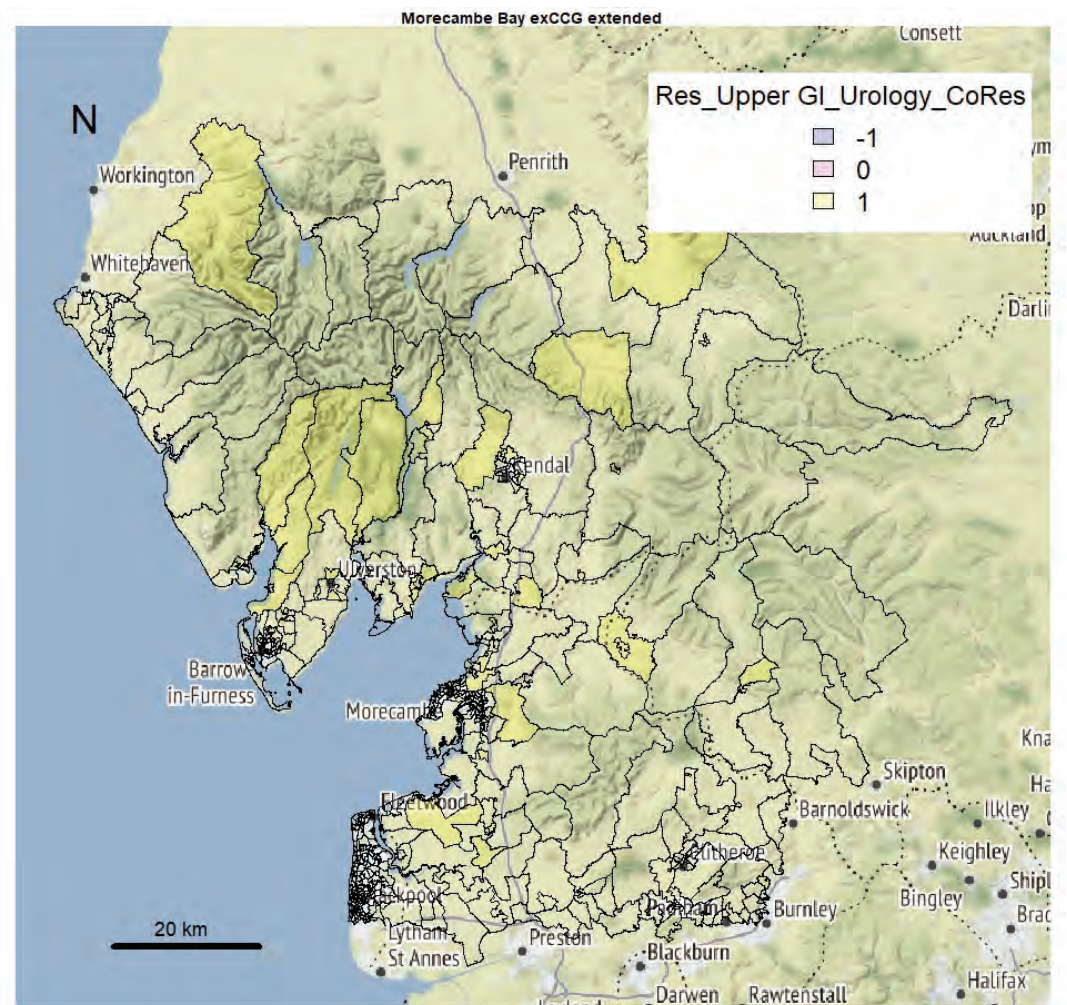

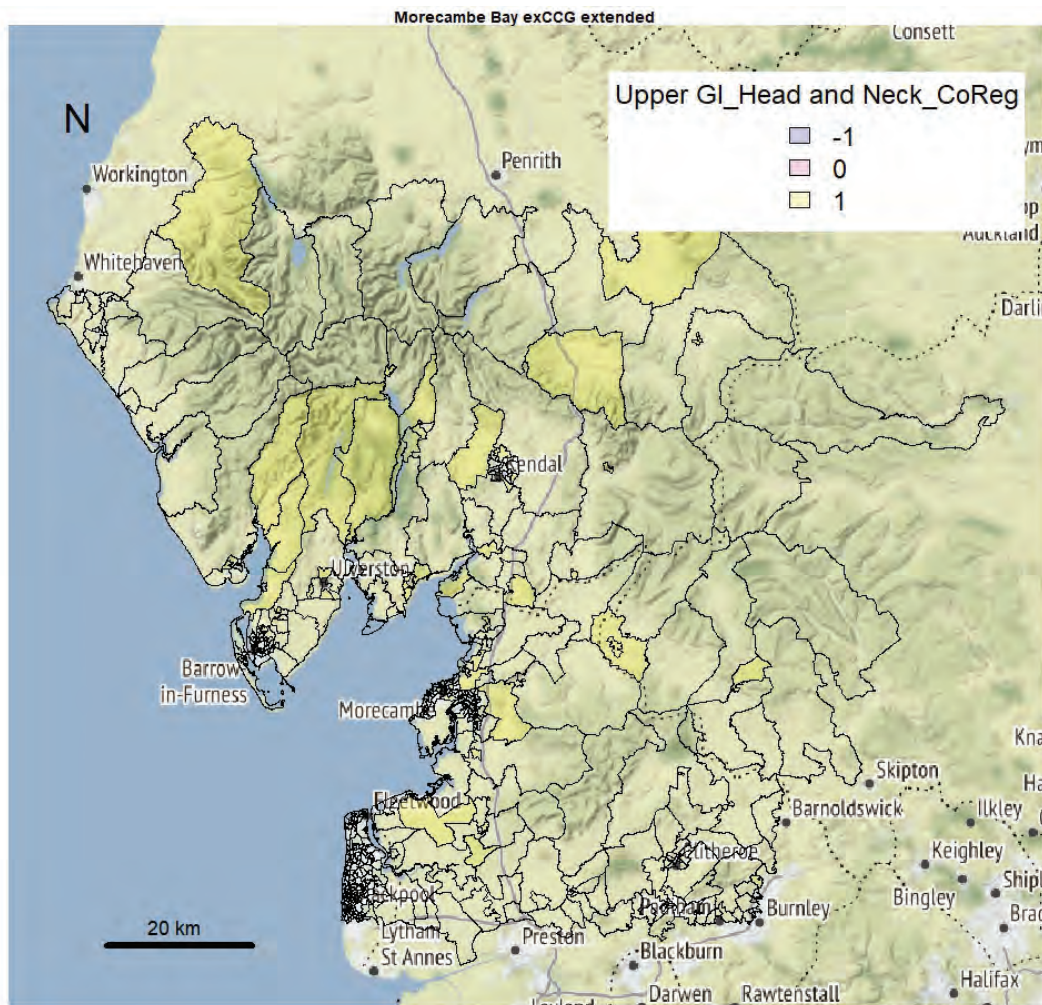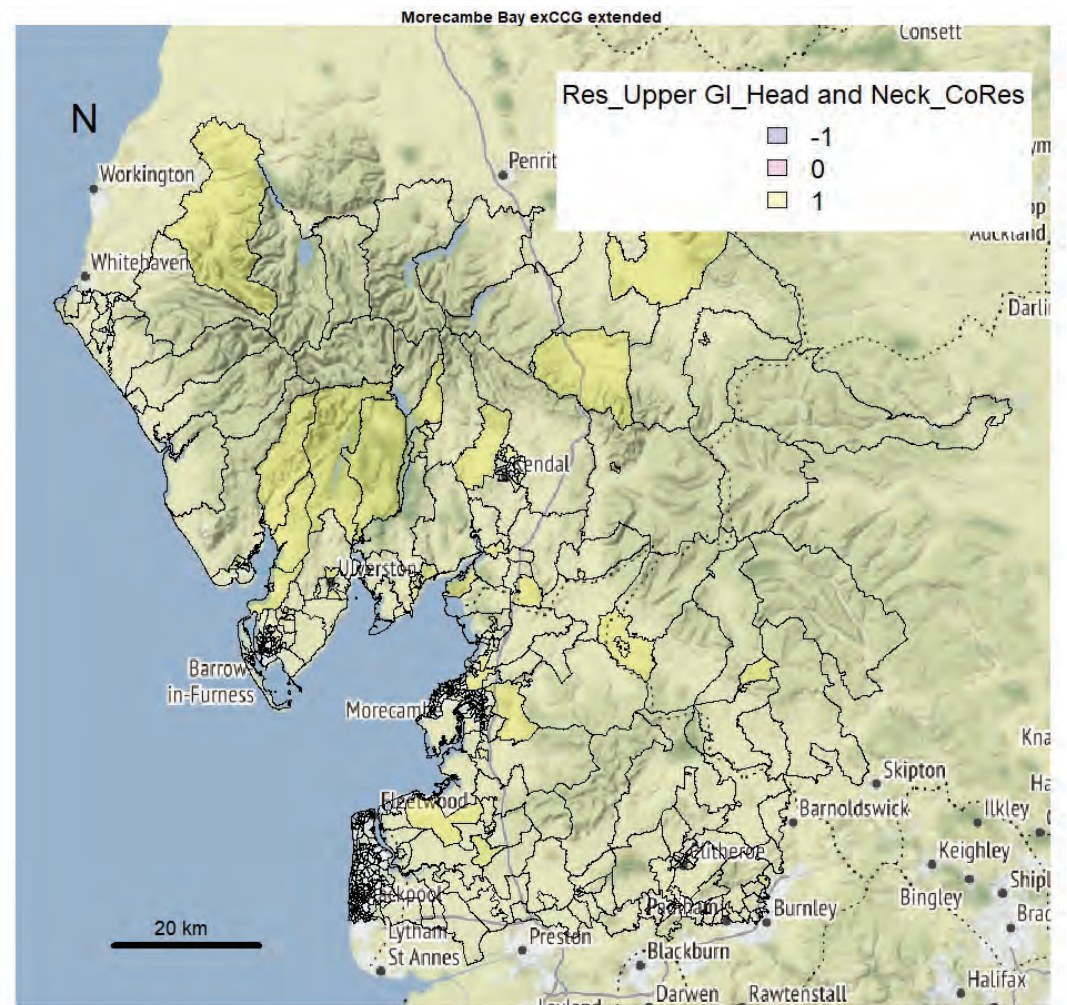

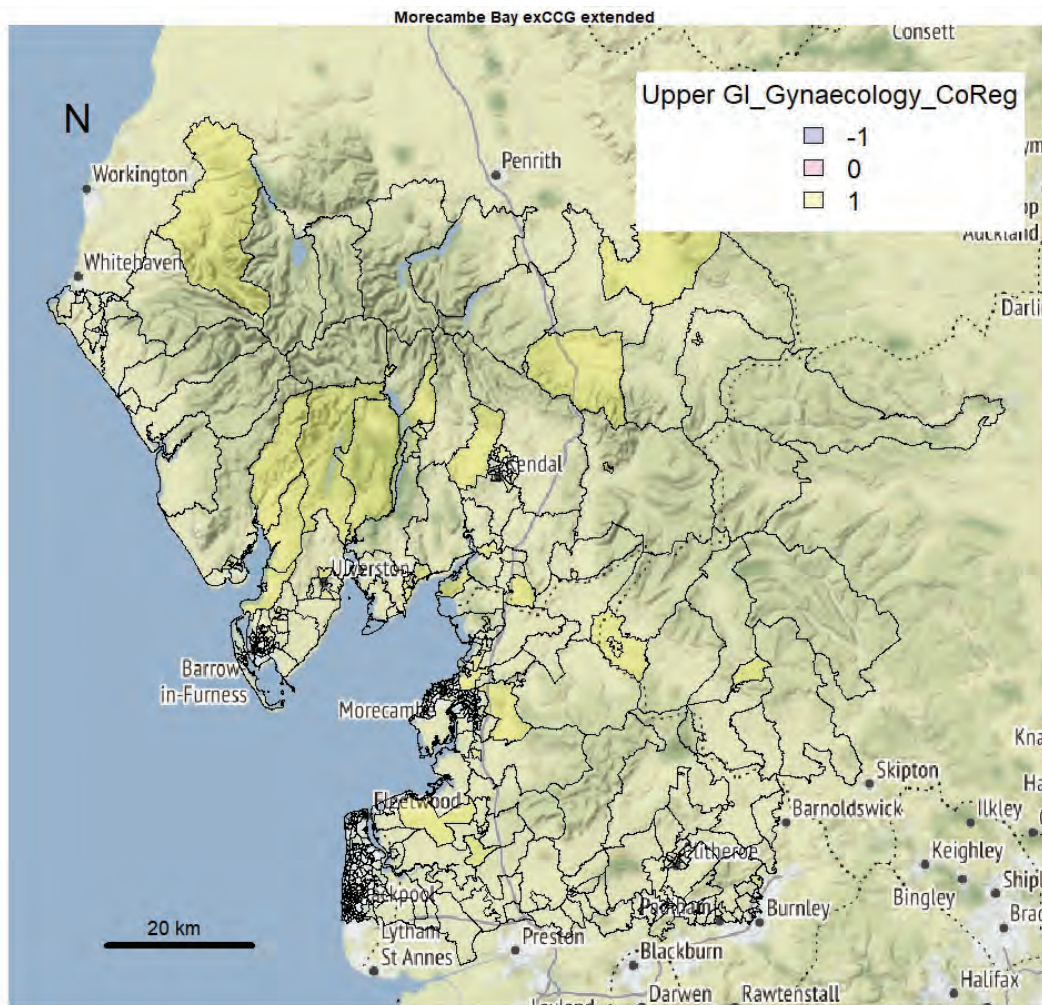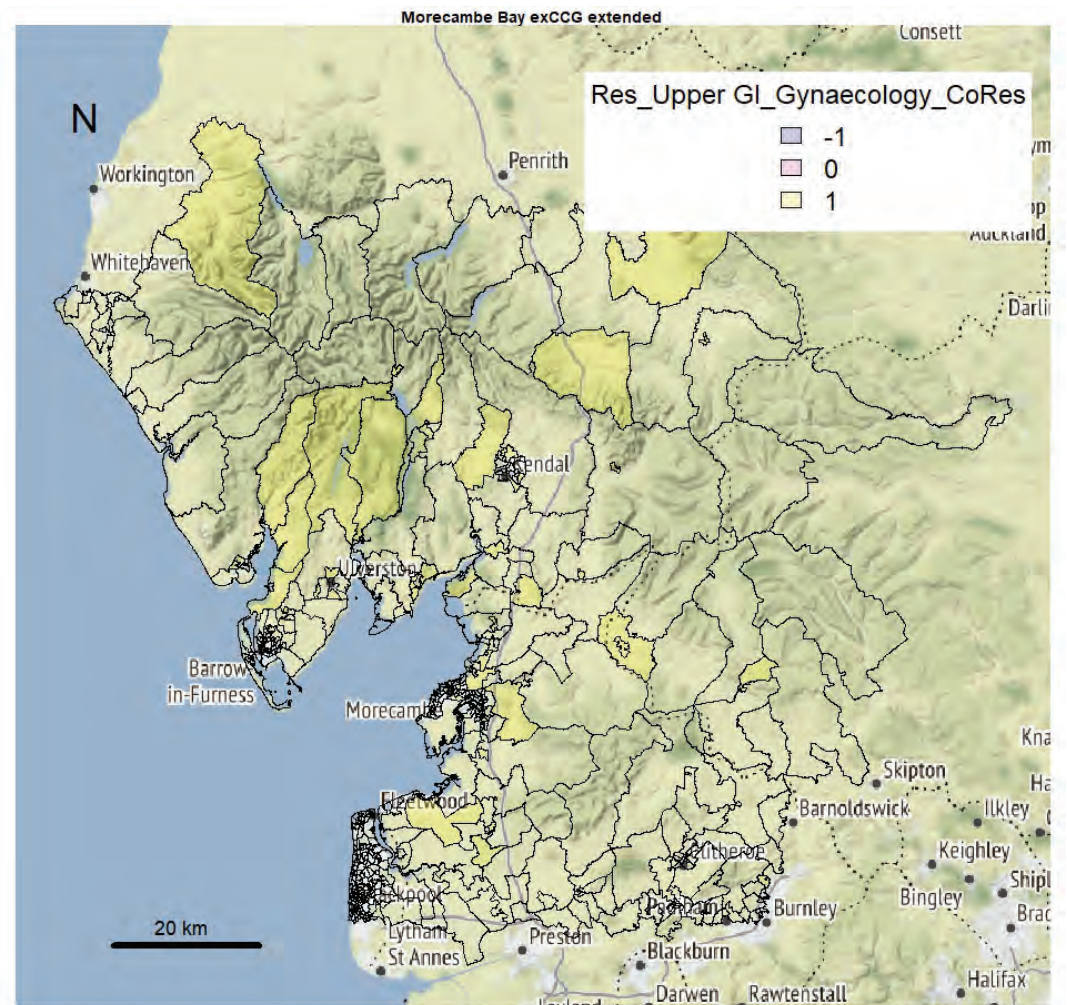

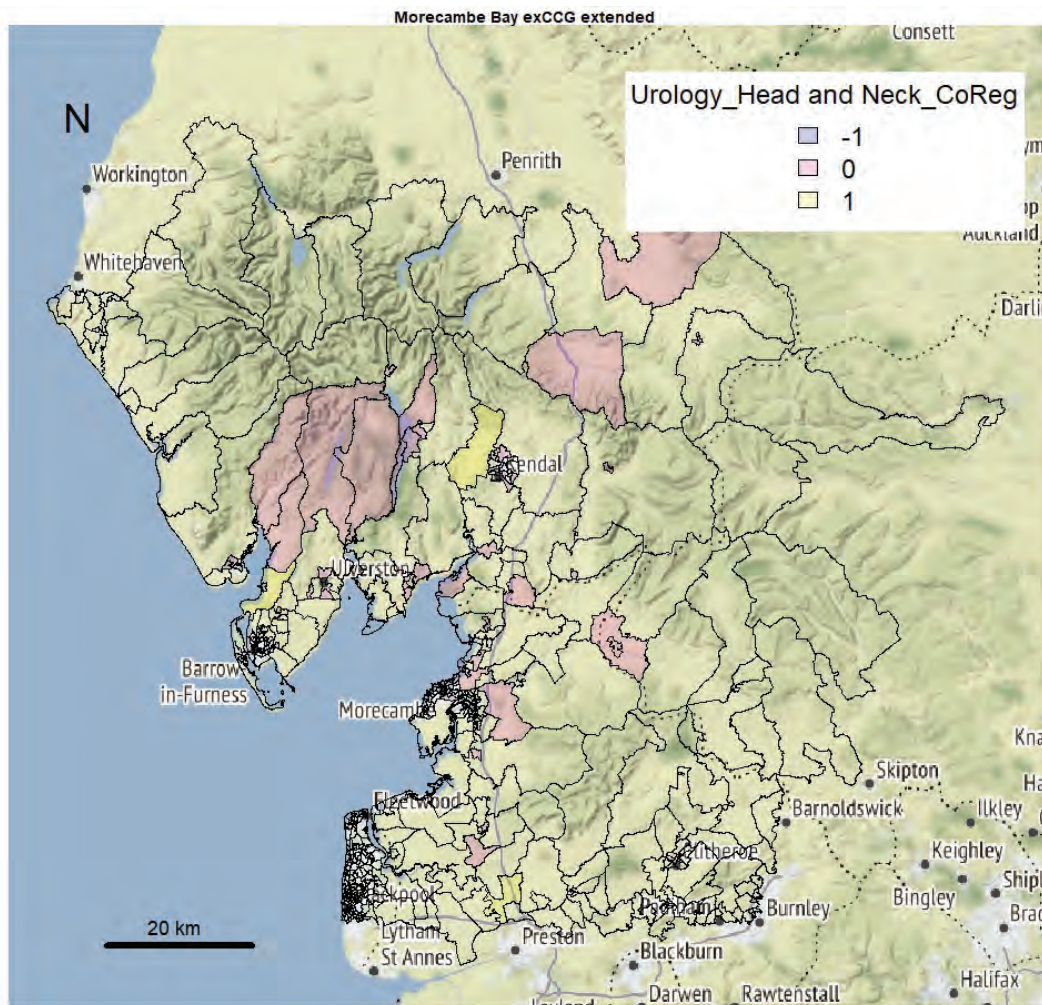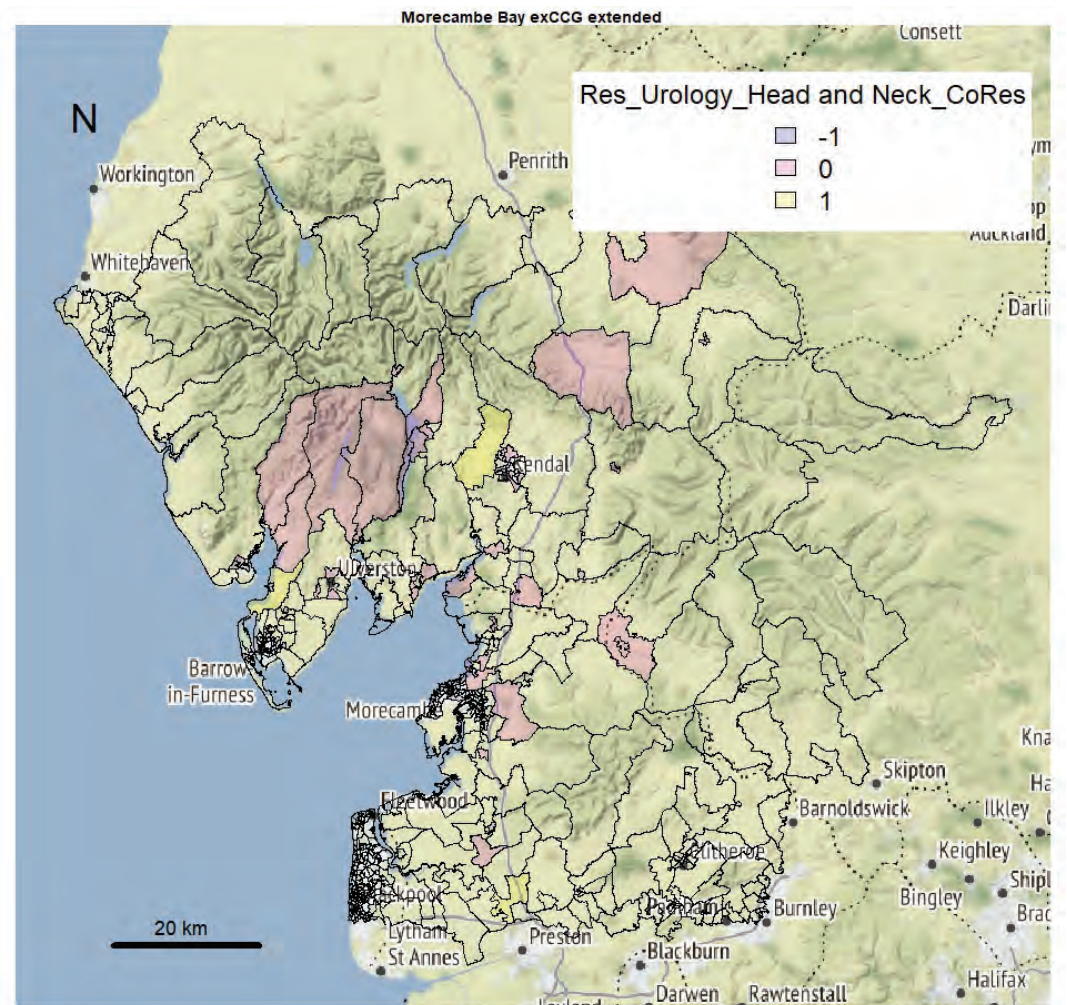

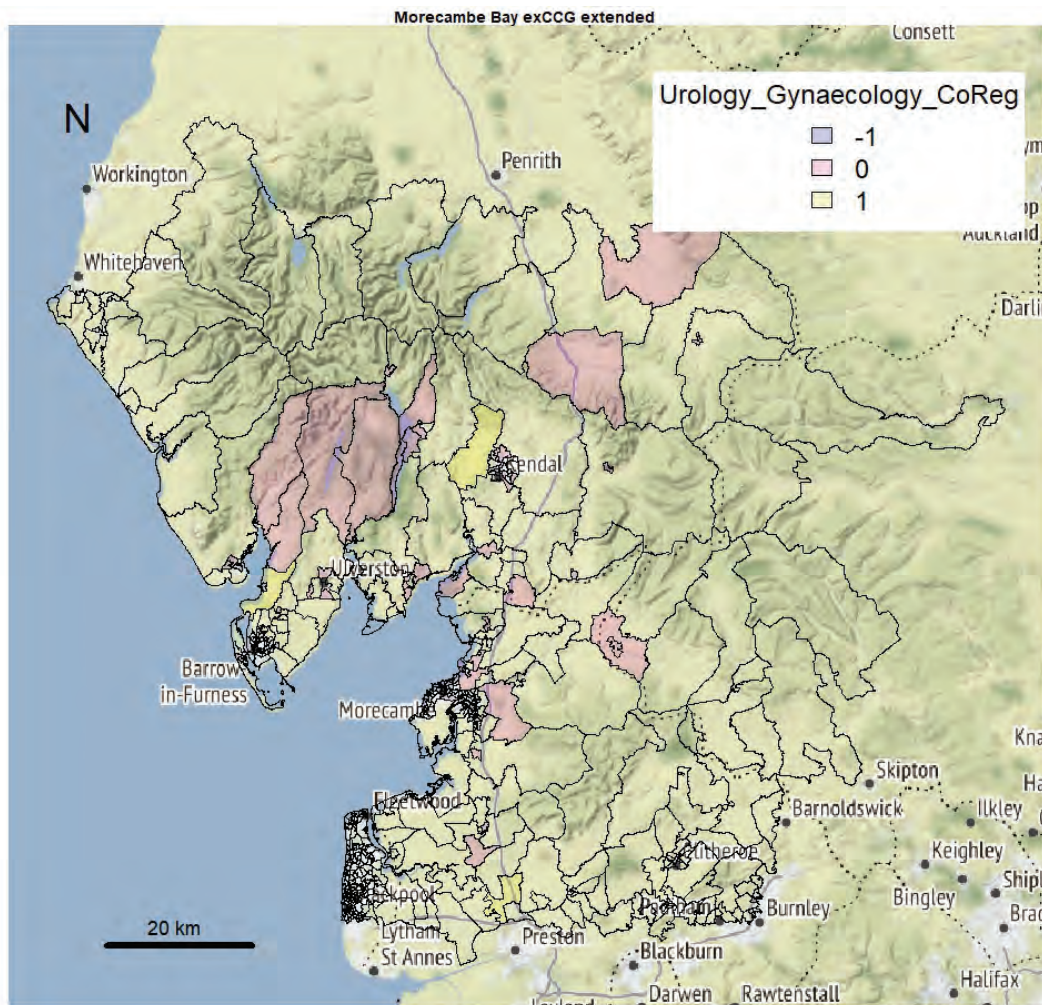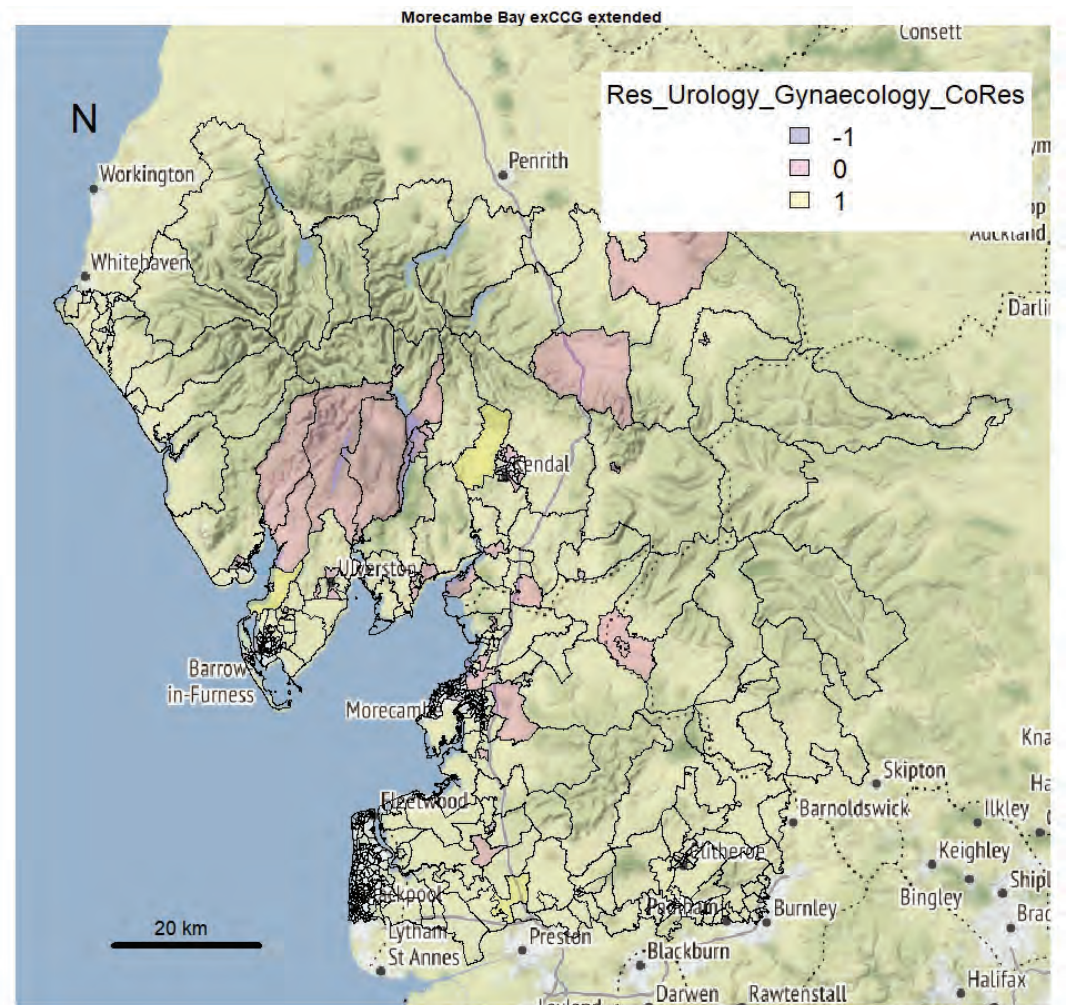

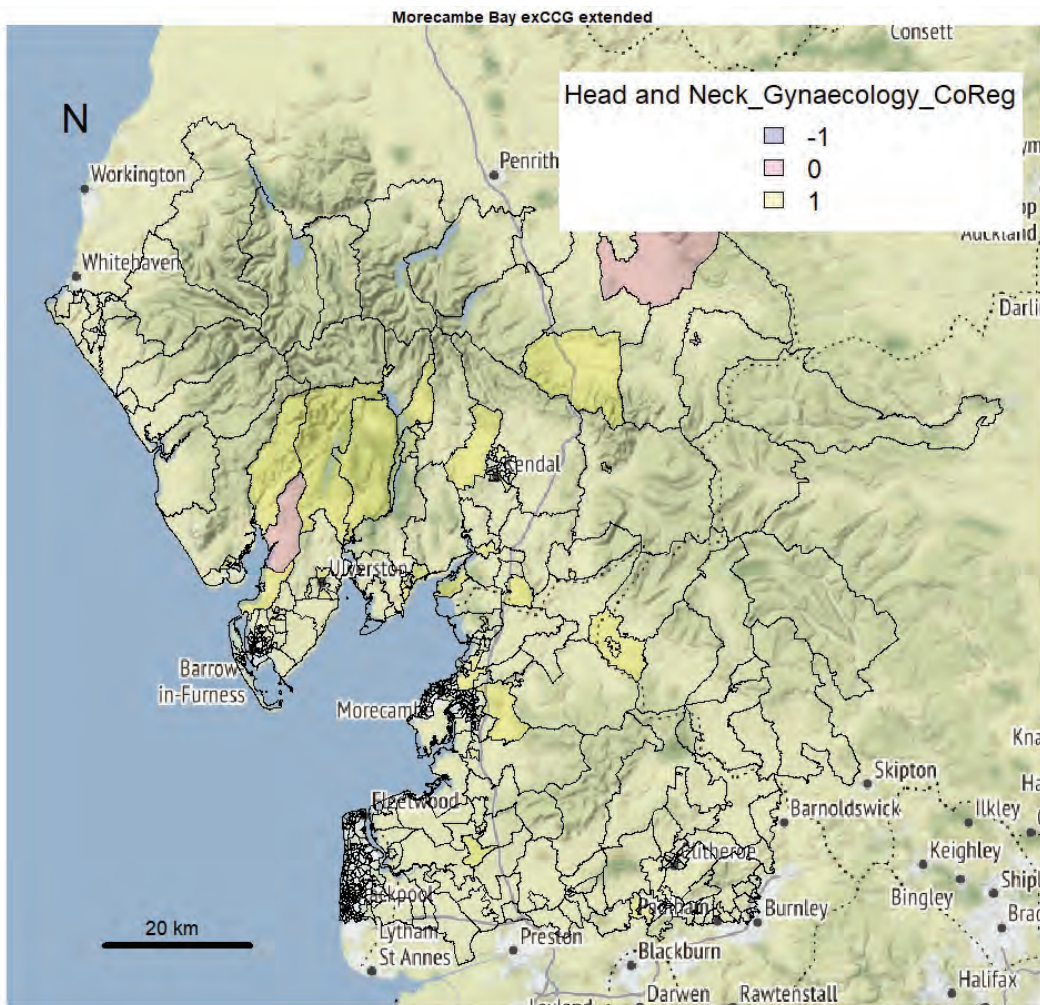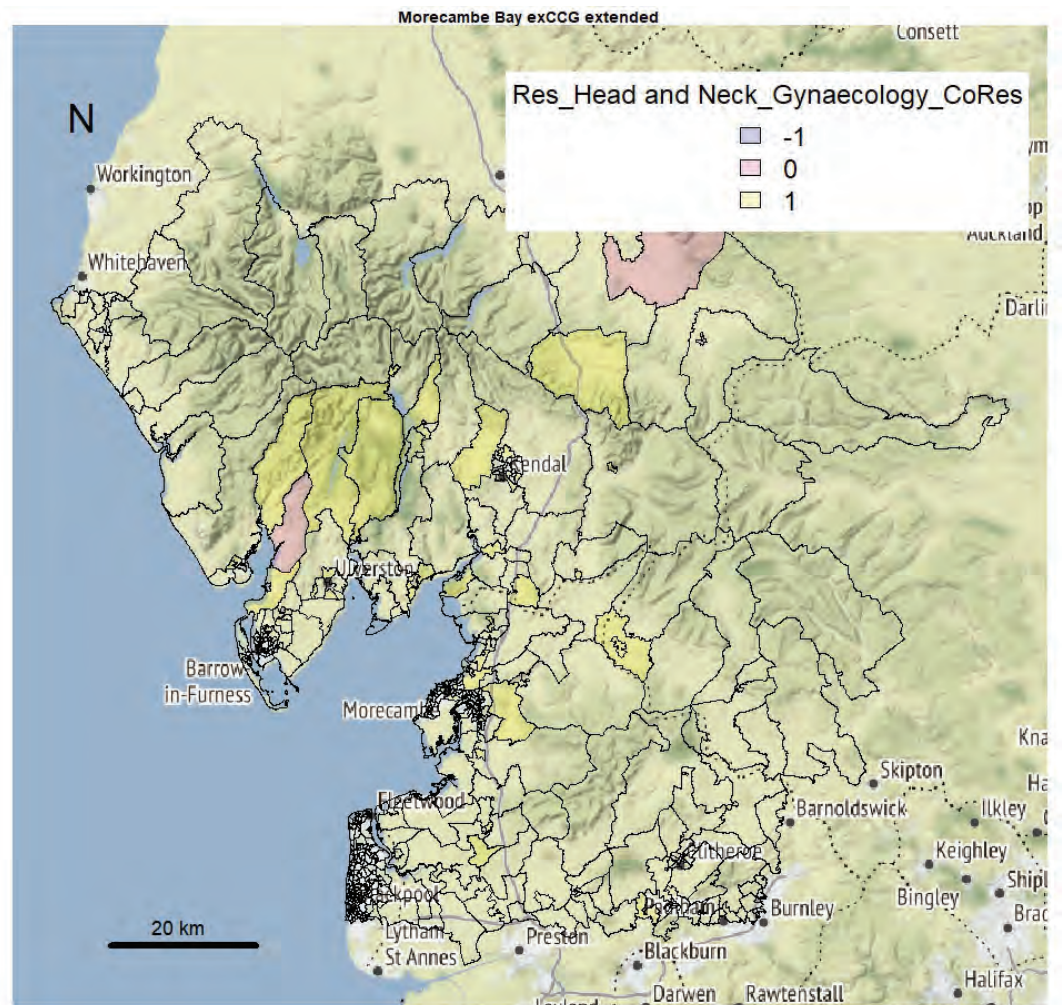

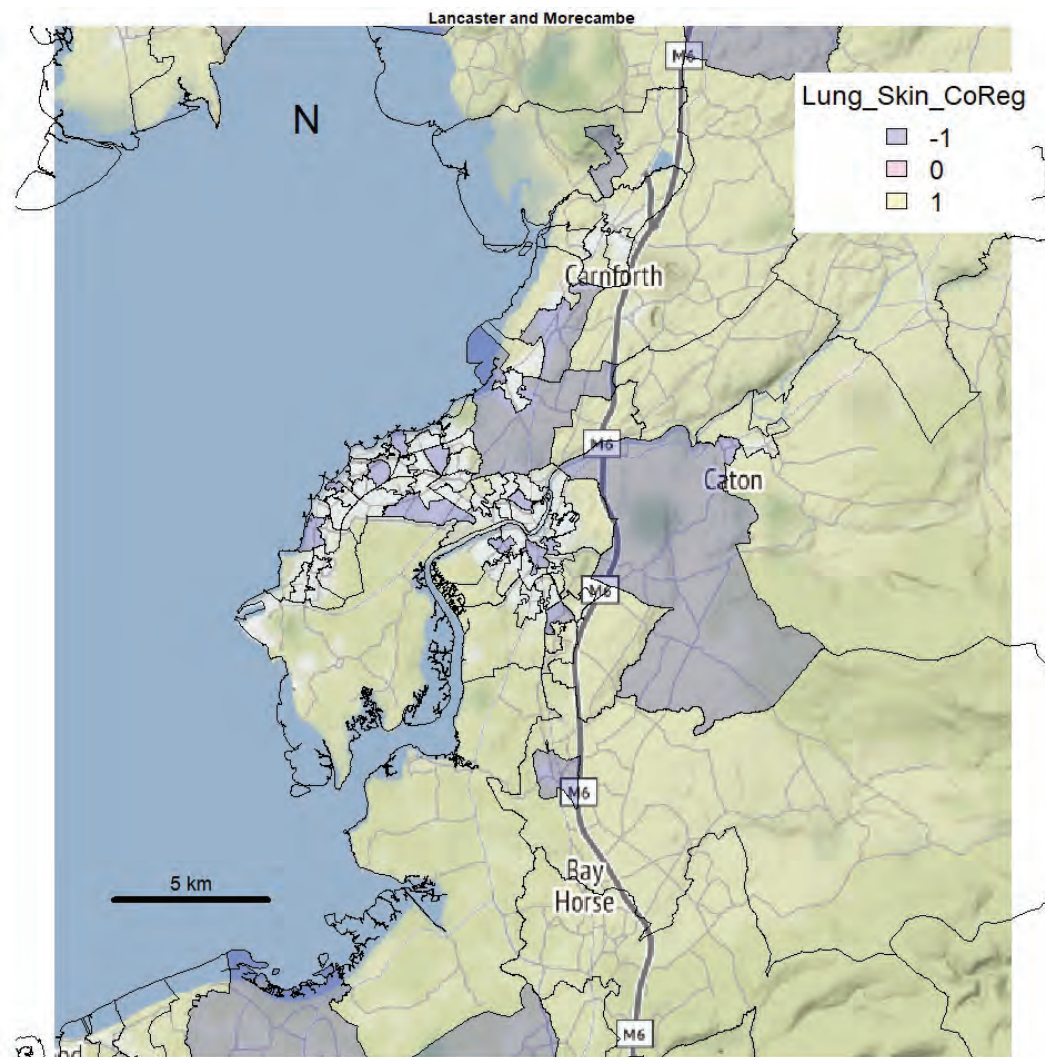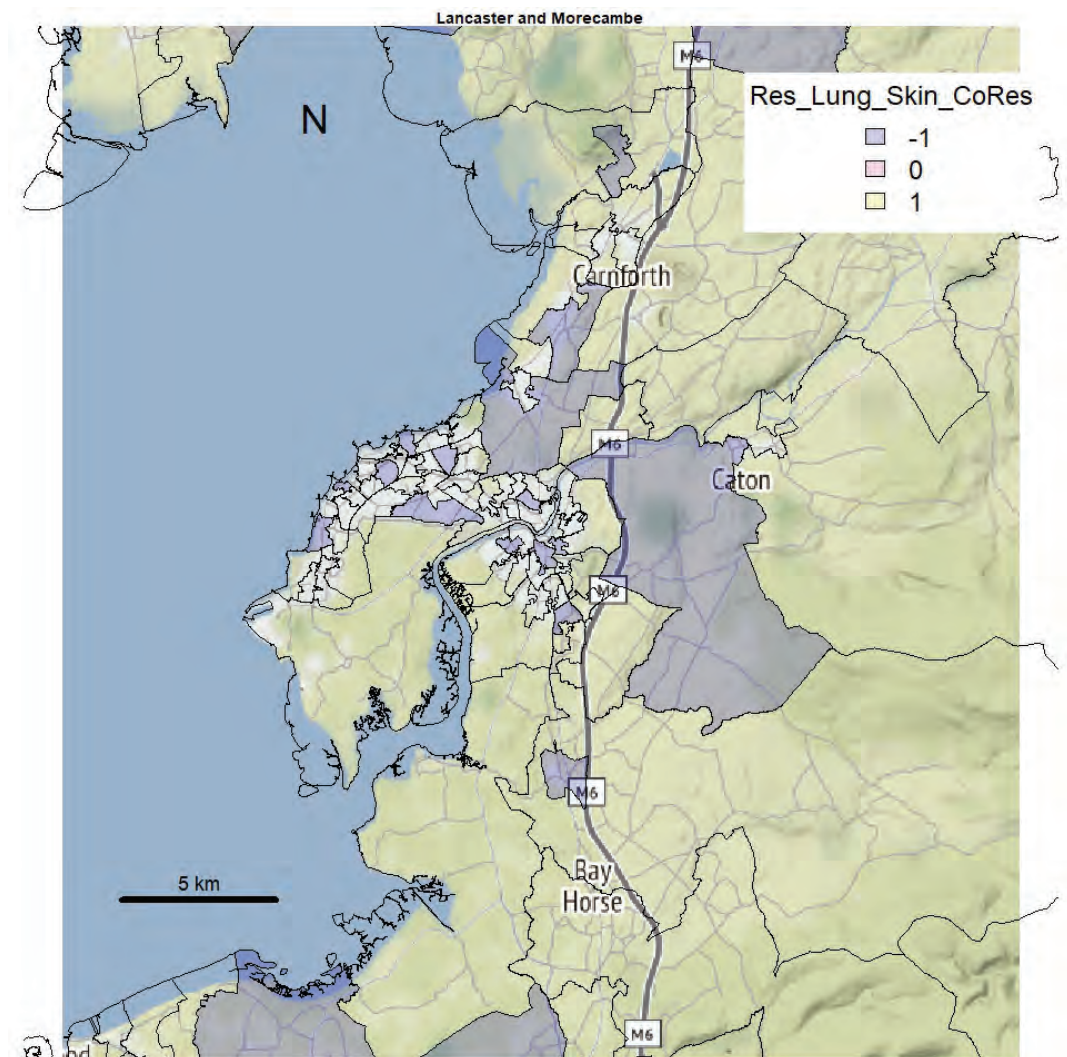

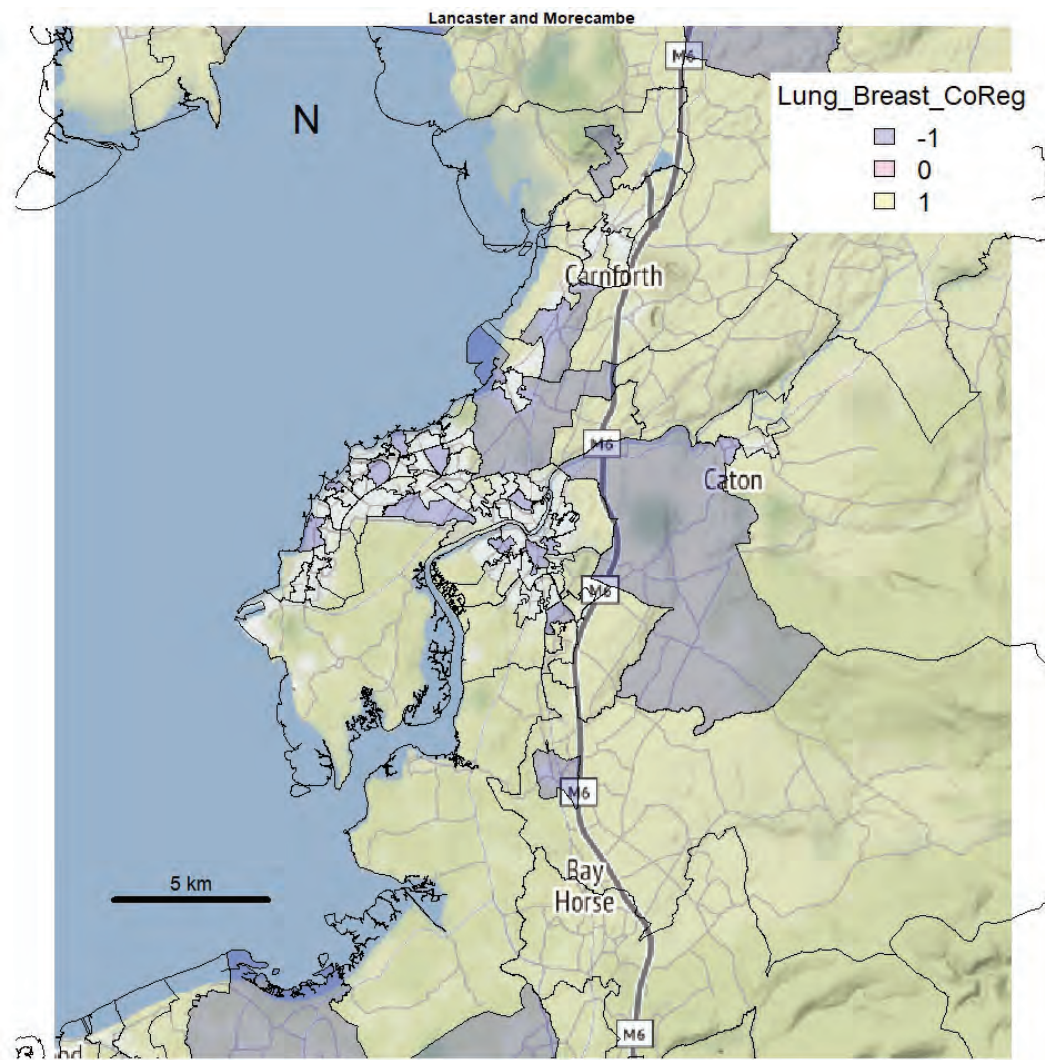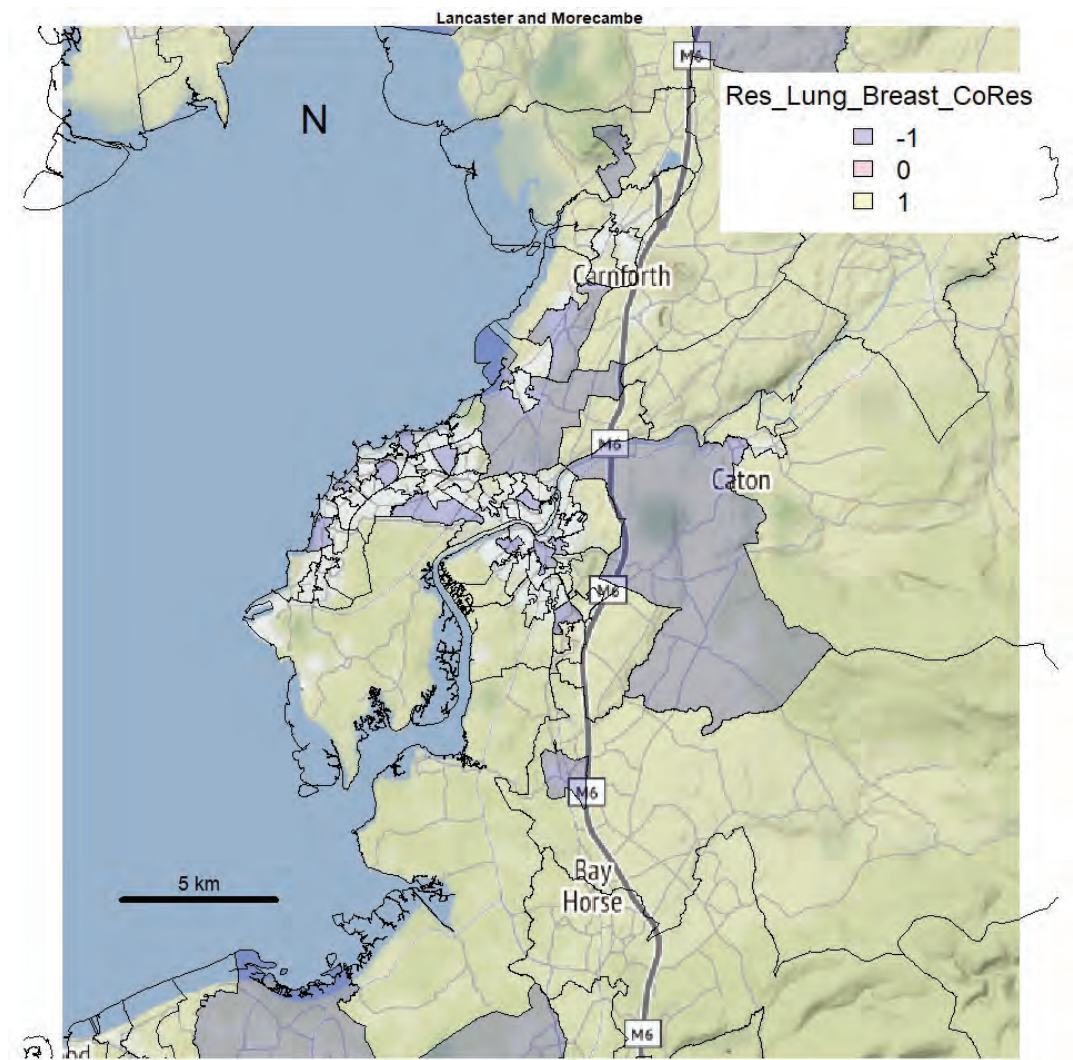



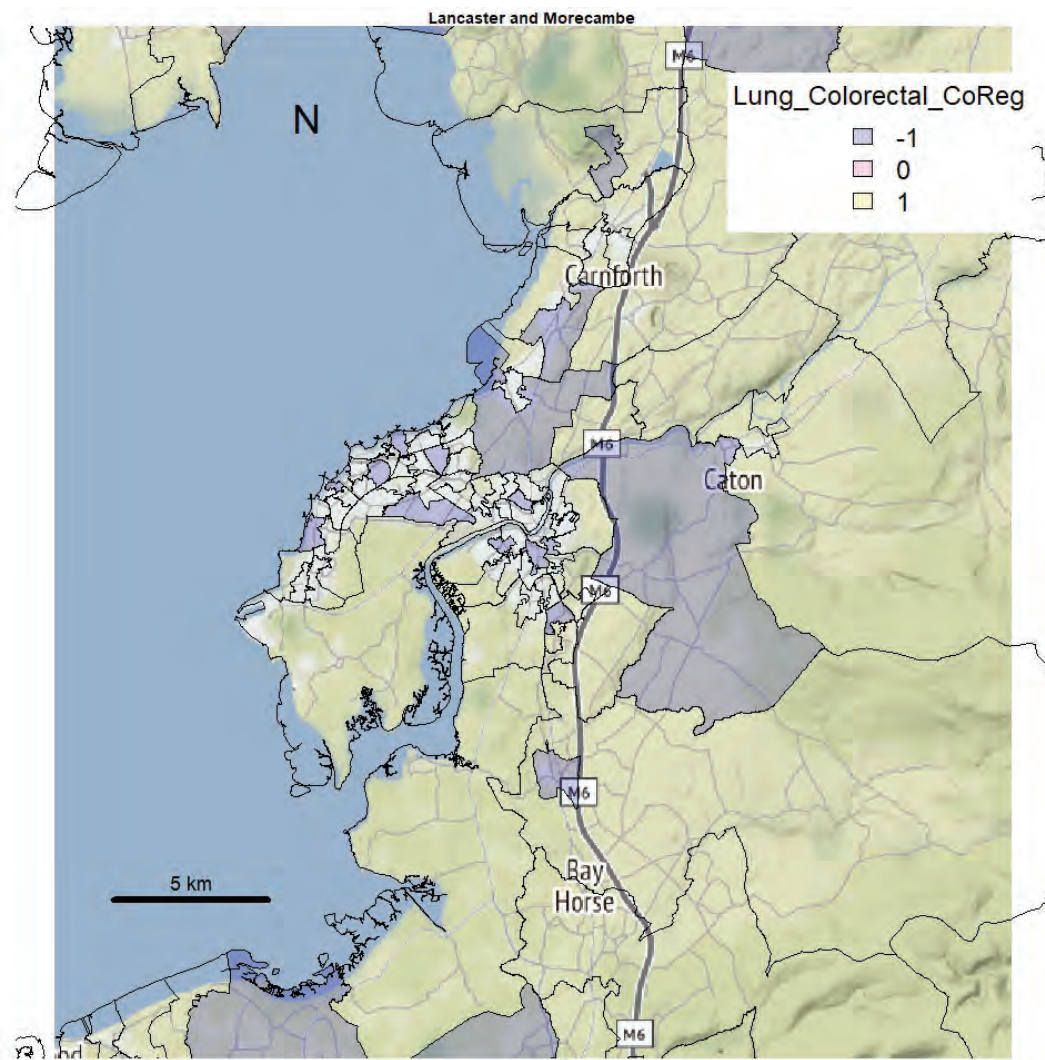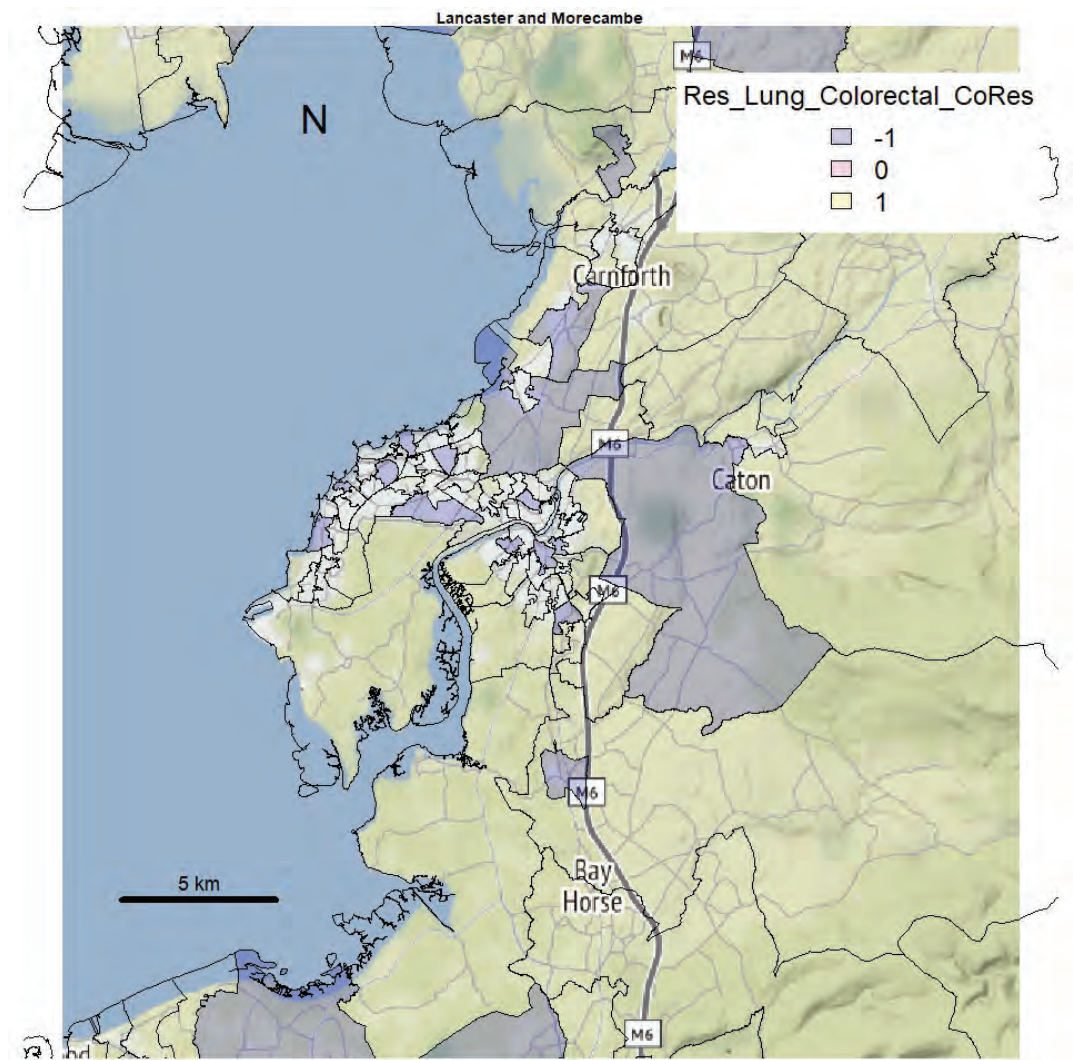

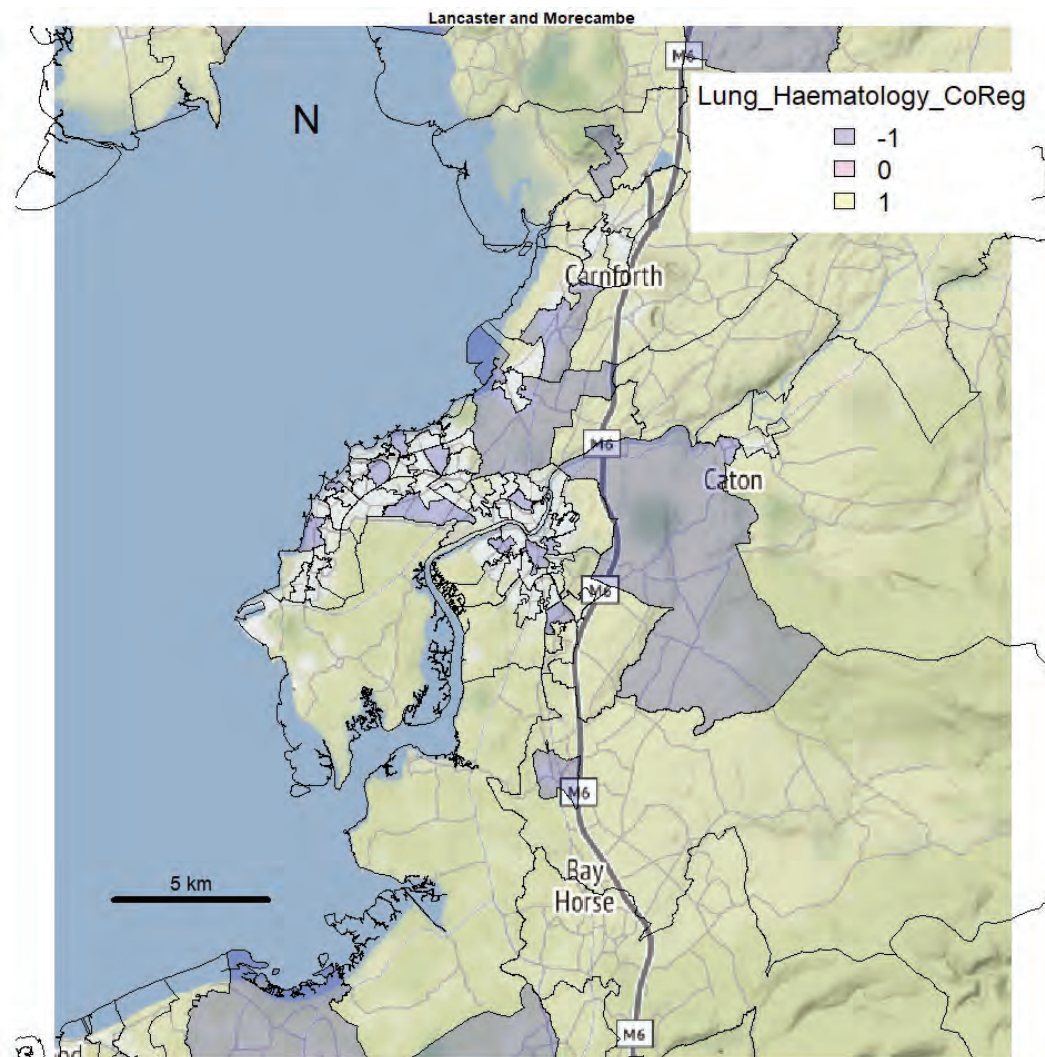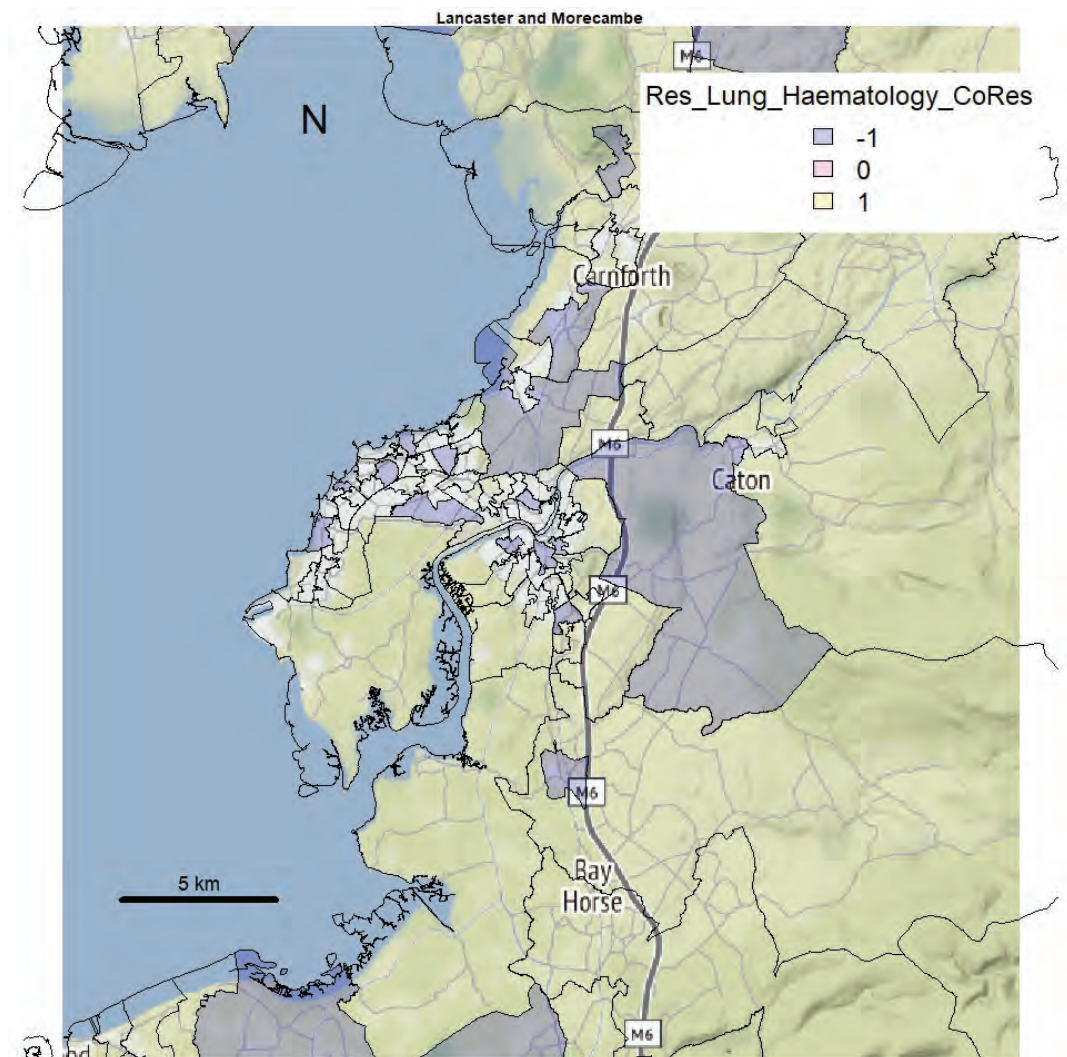

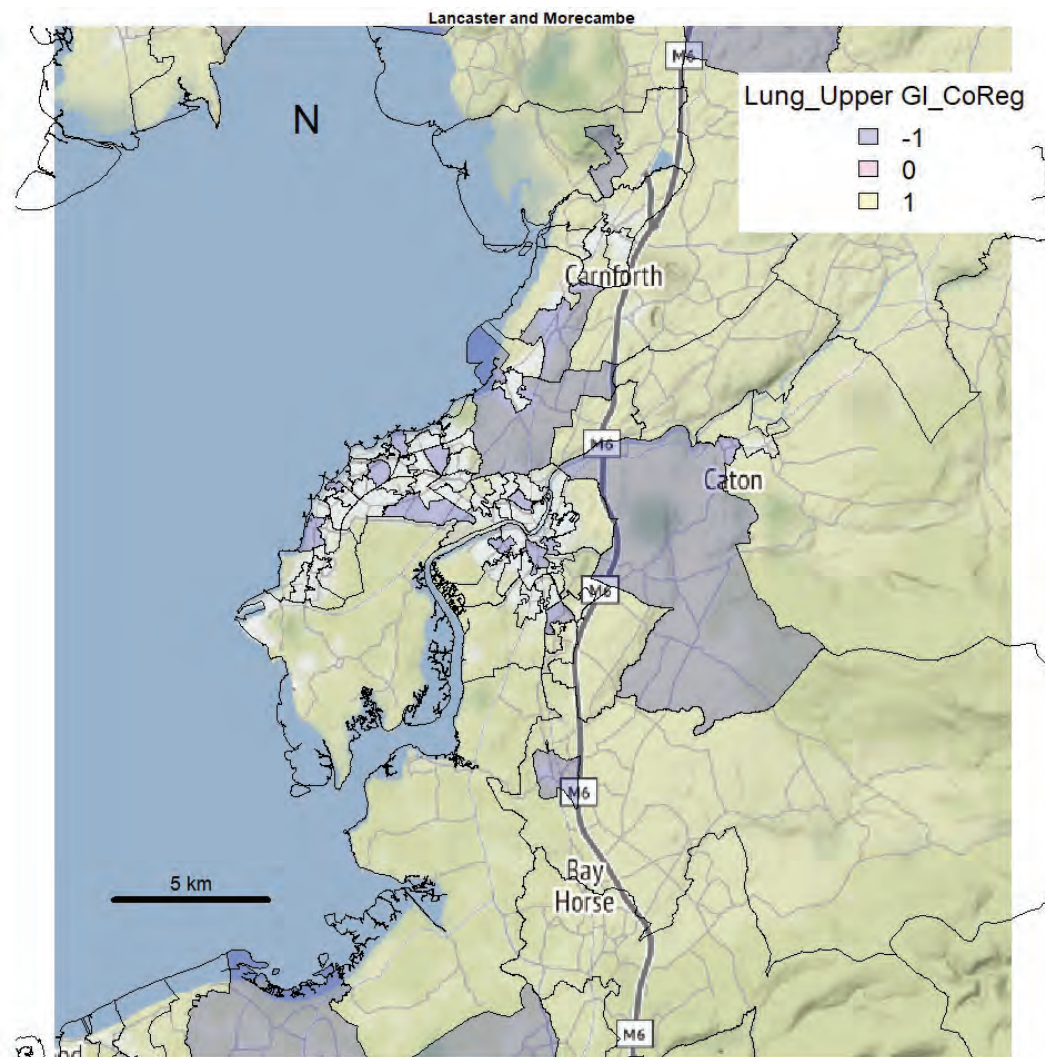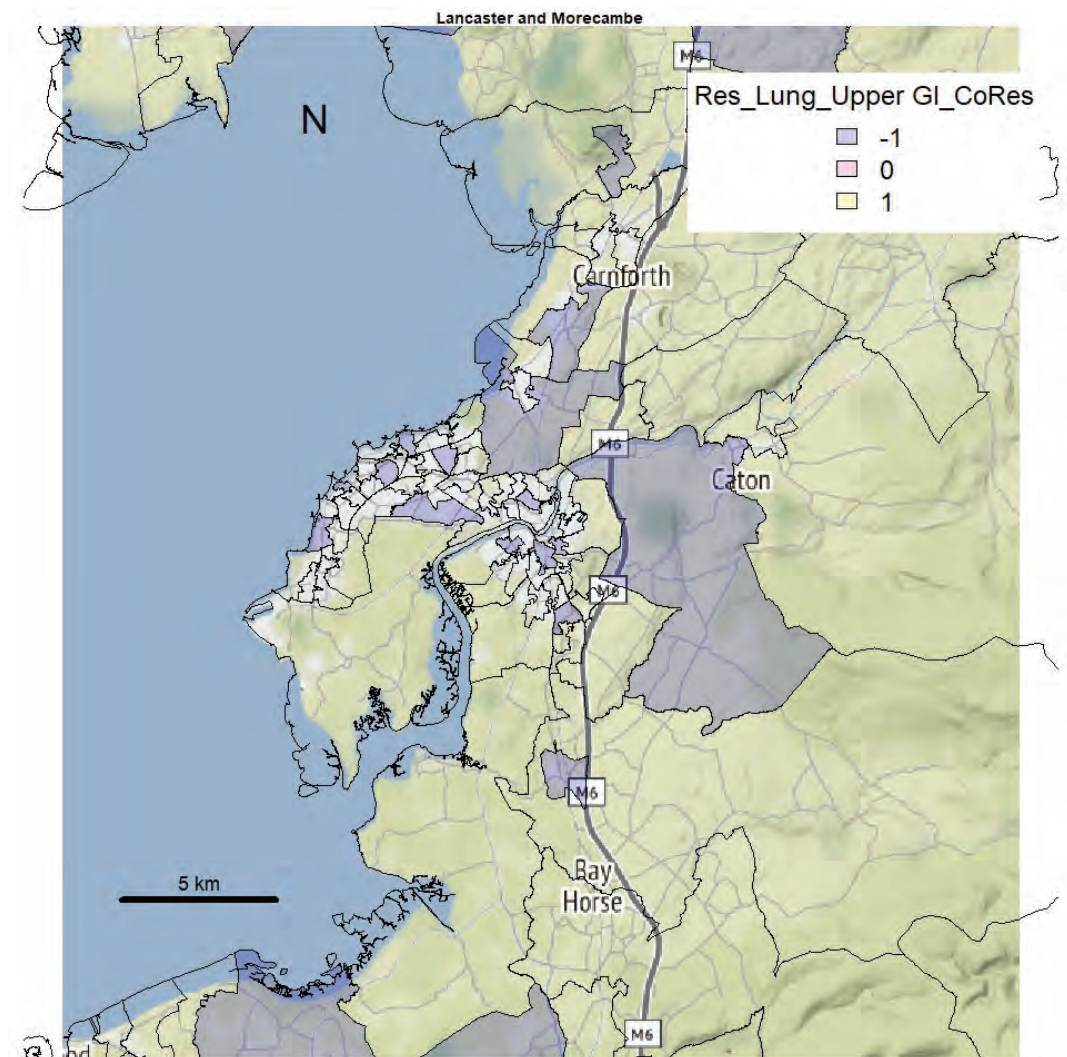

Lancaster and Morecambe

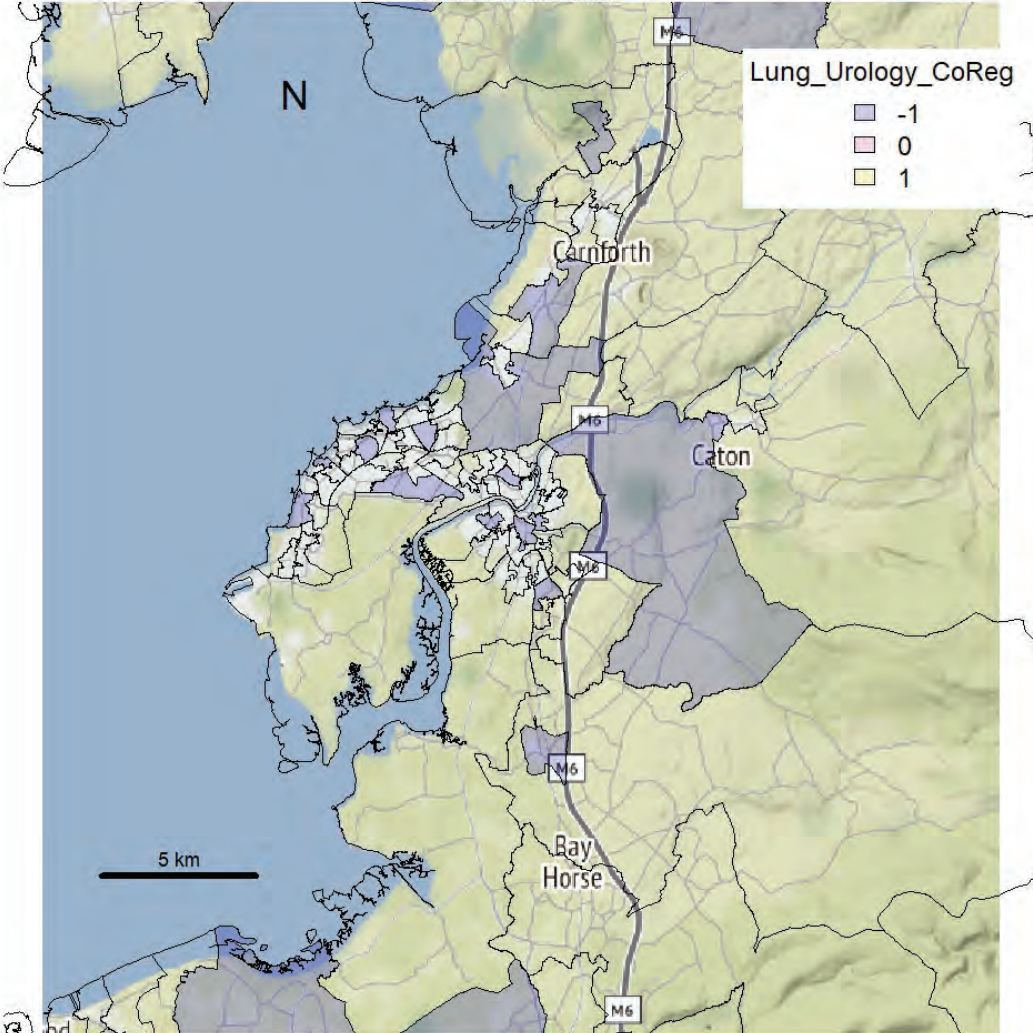

Lancaster and Morecambe

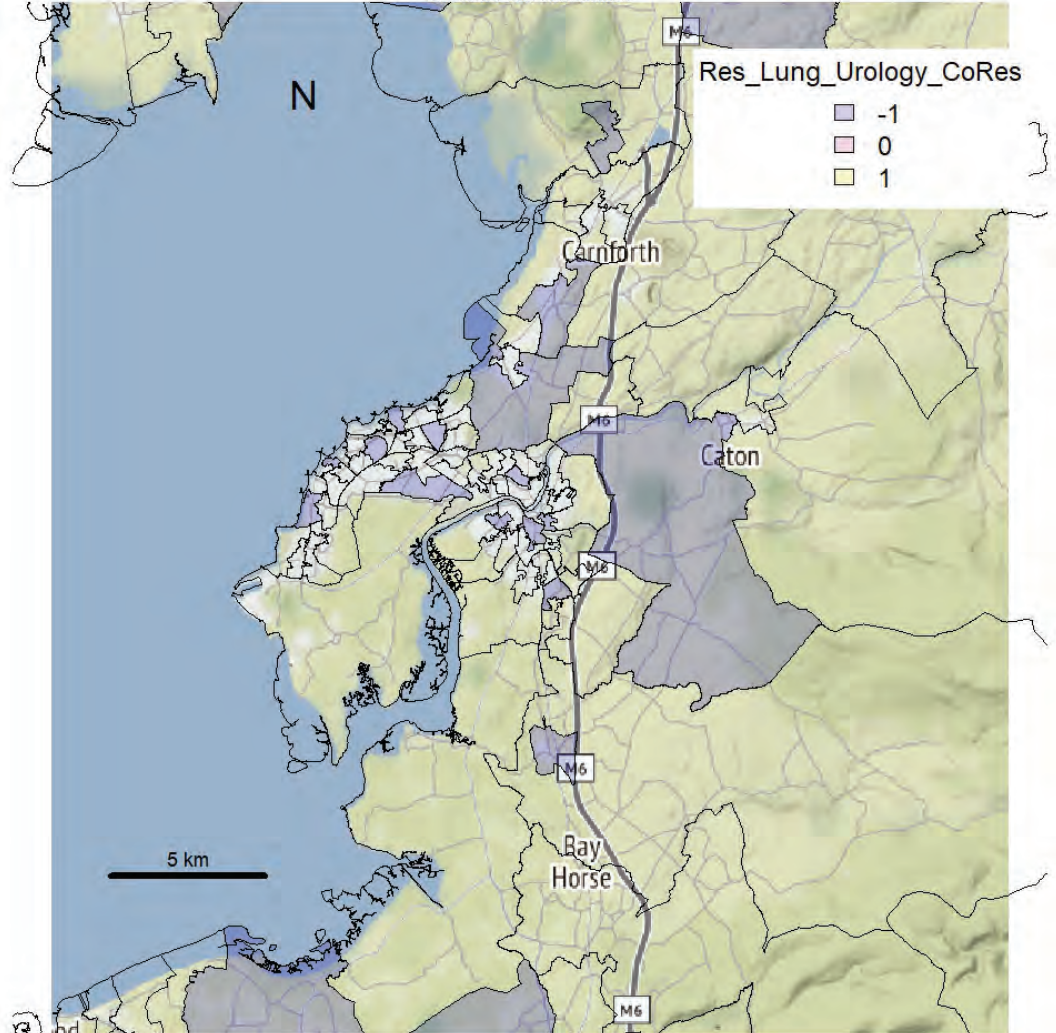

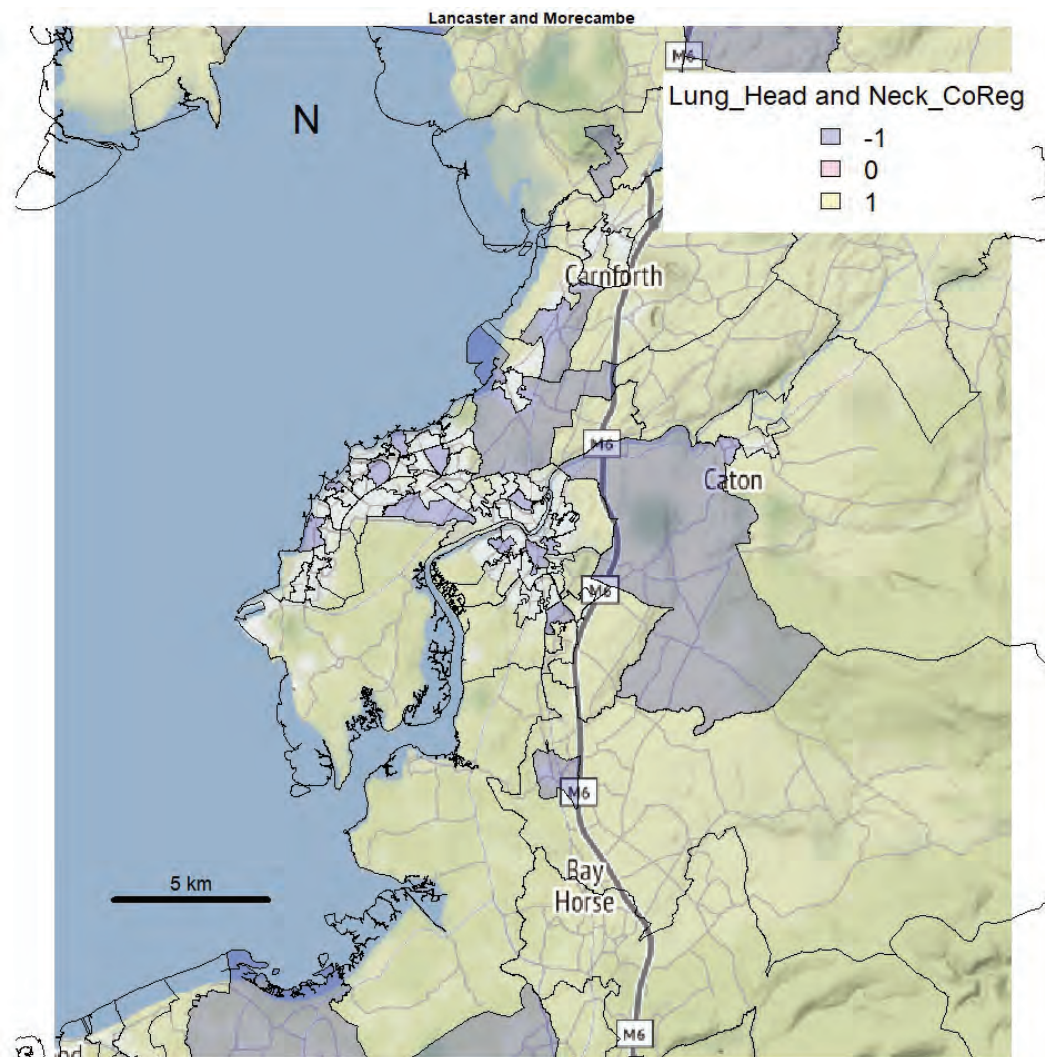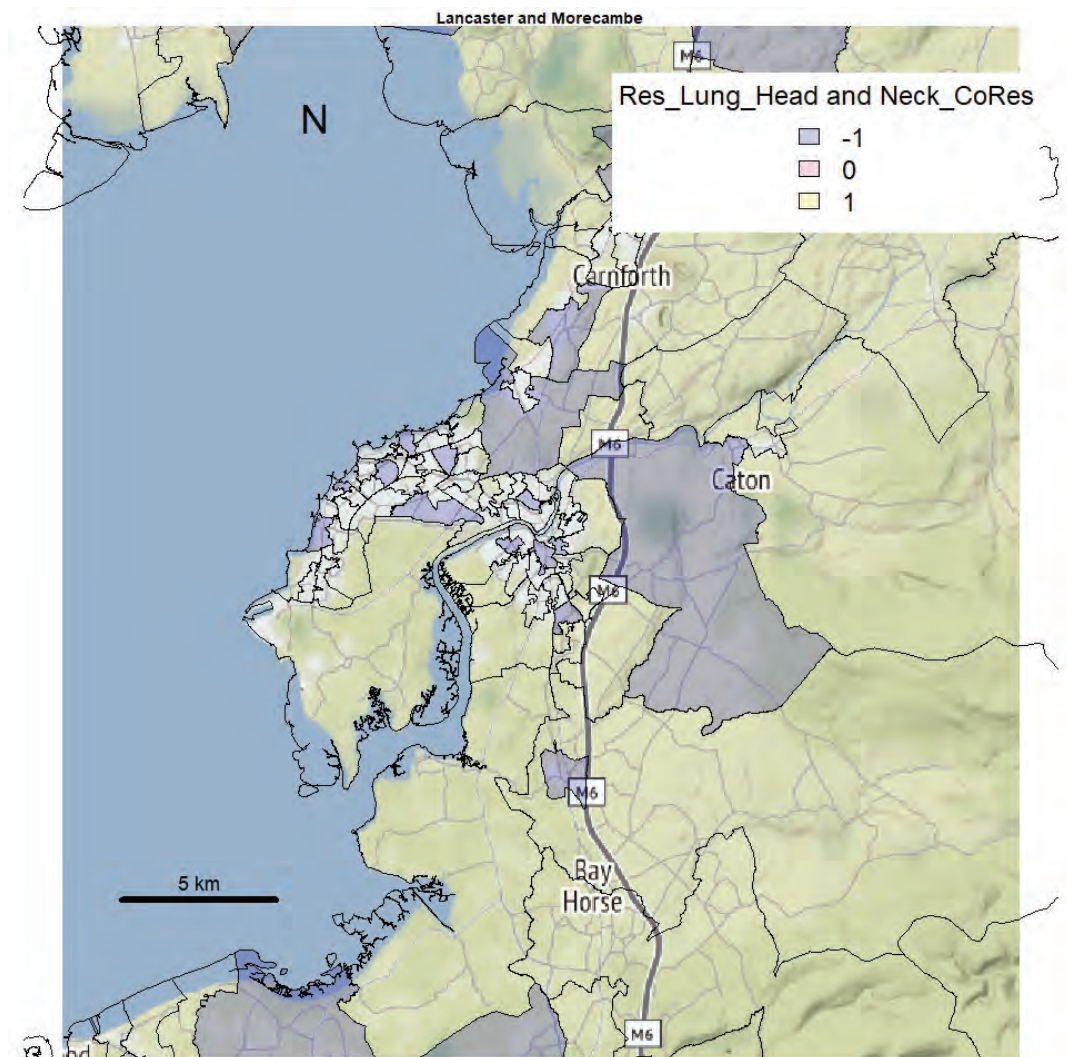

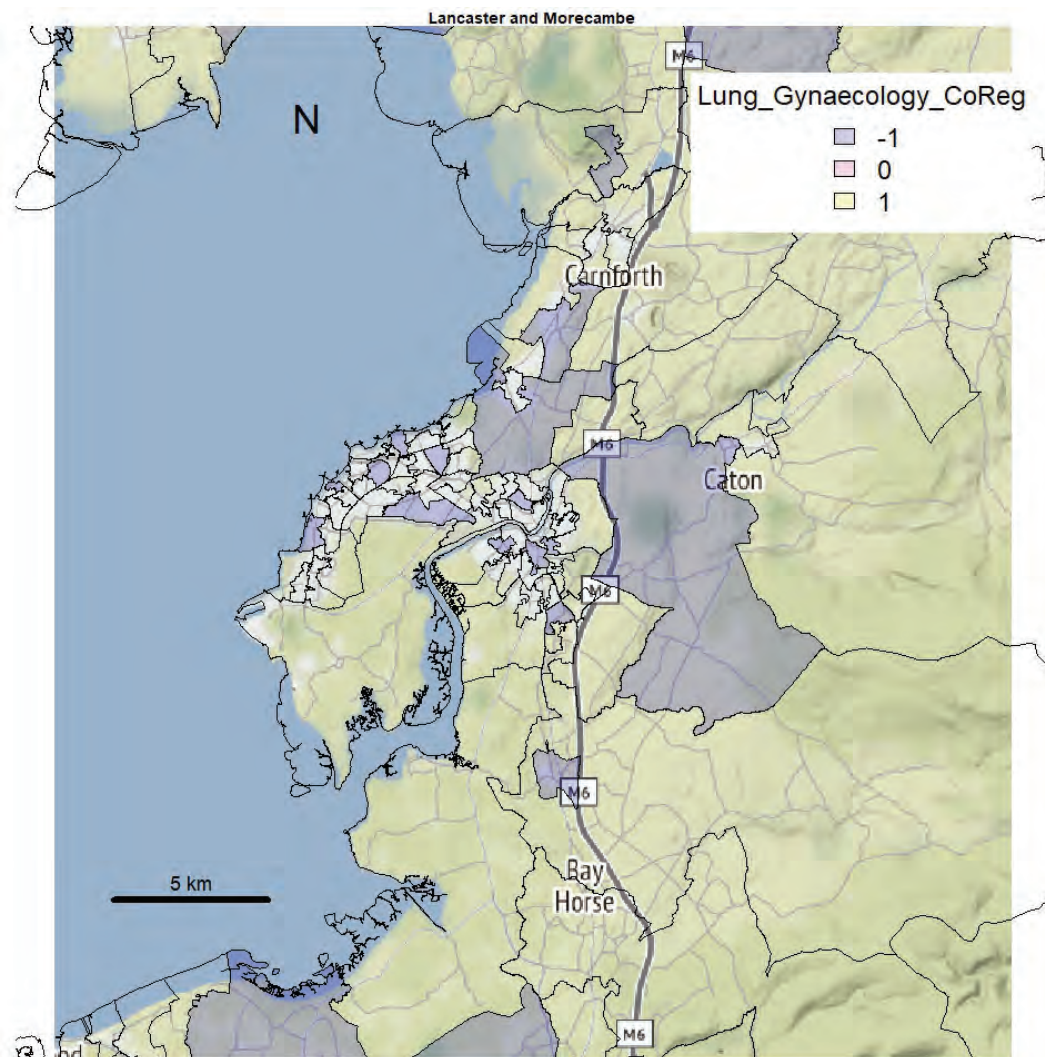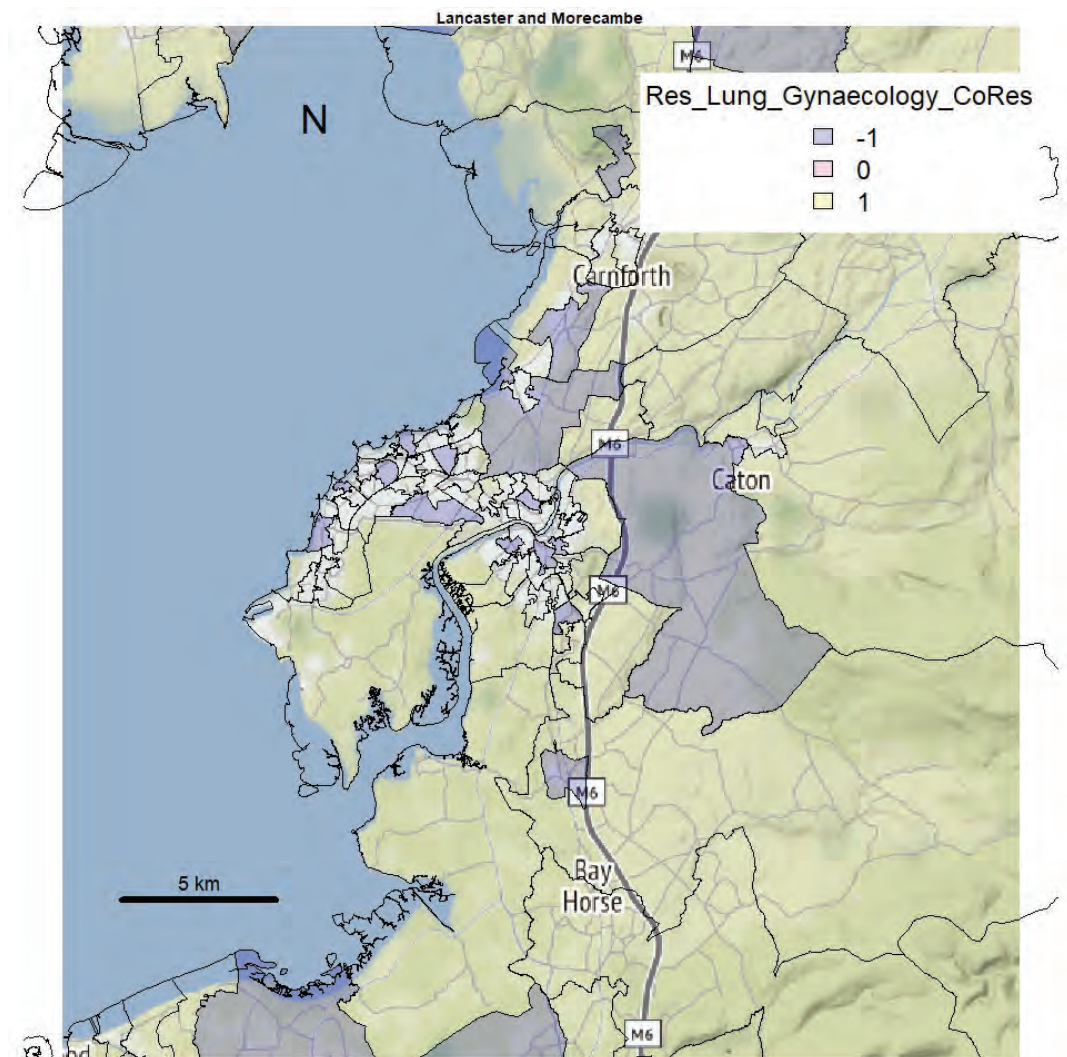

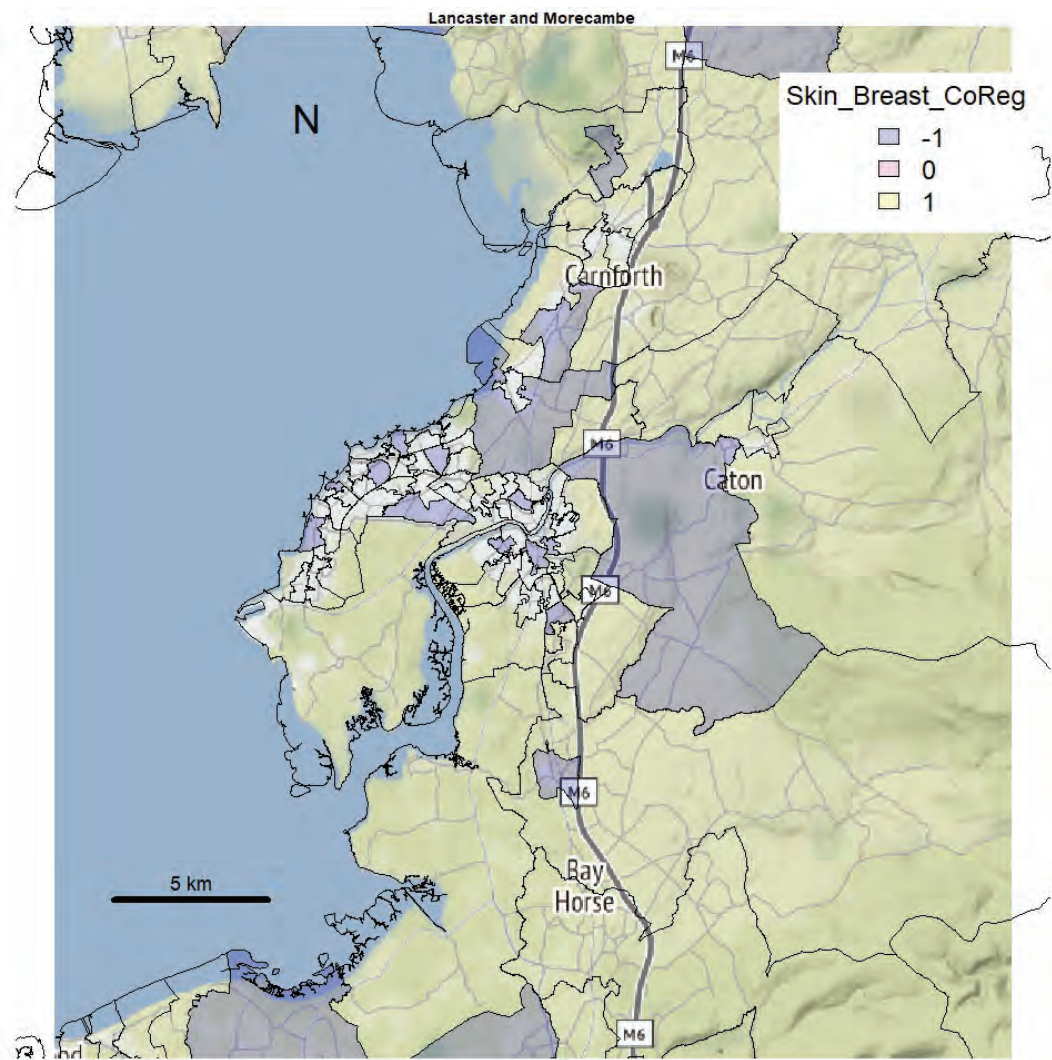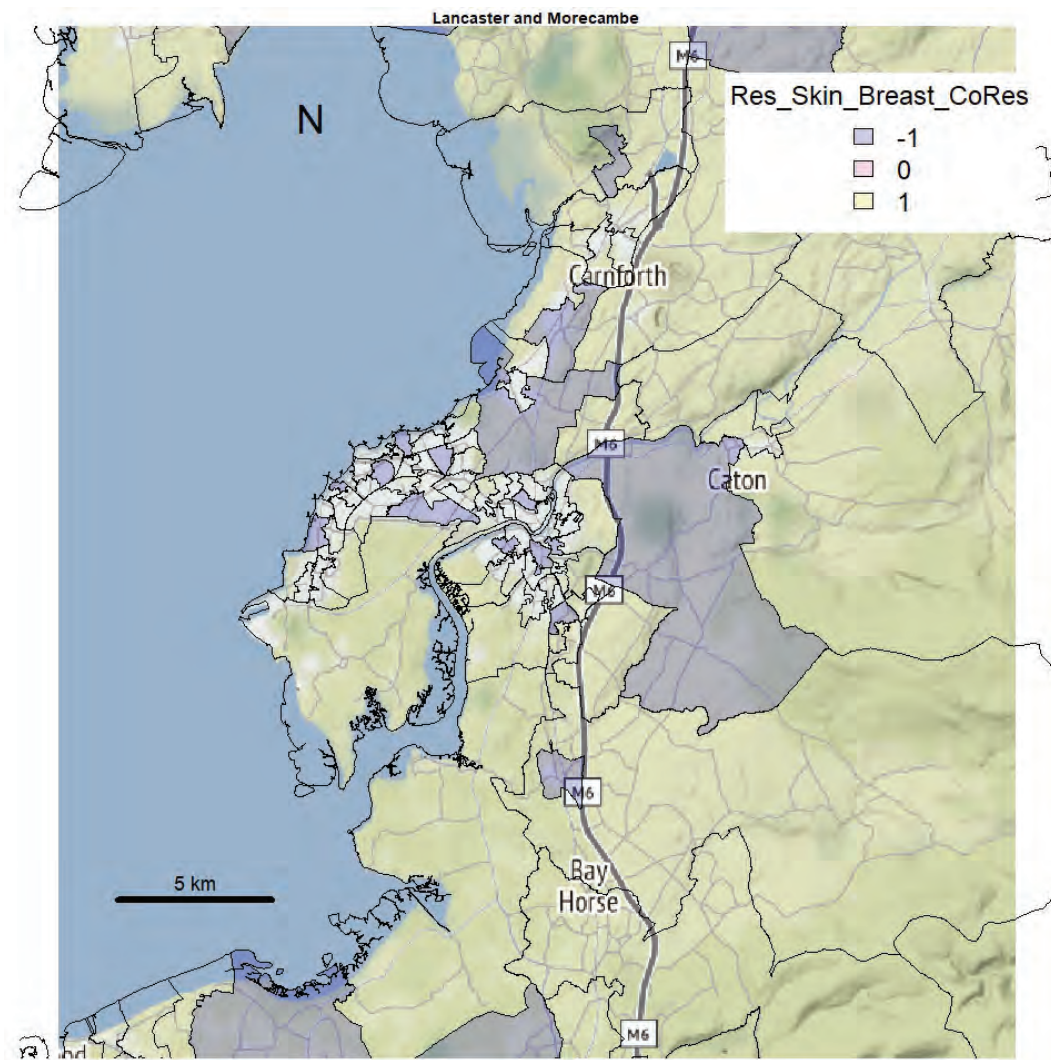

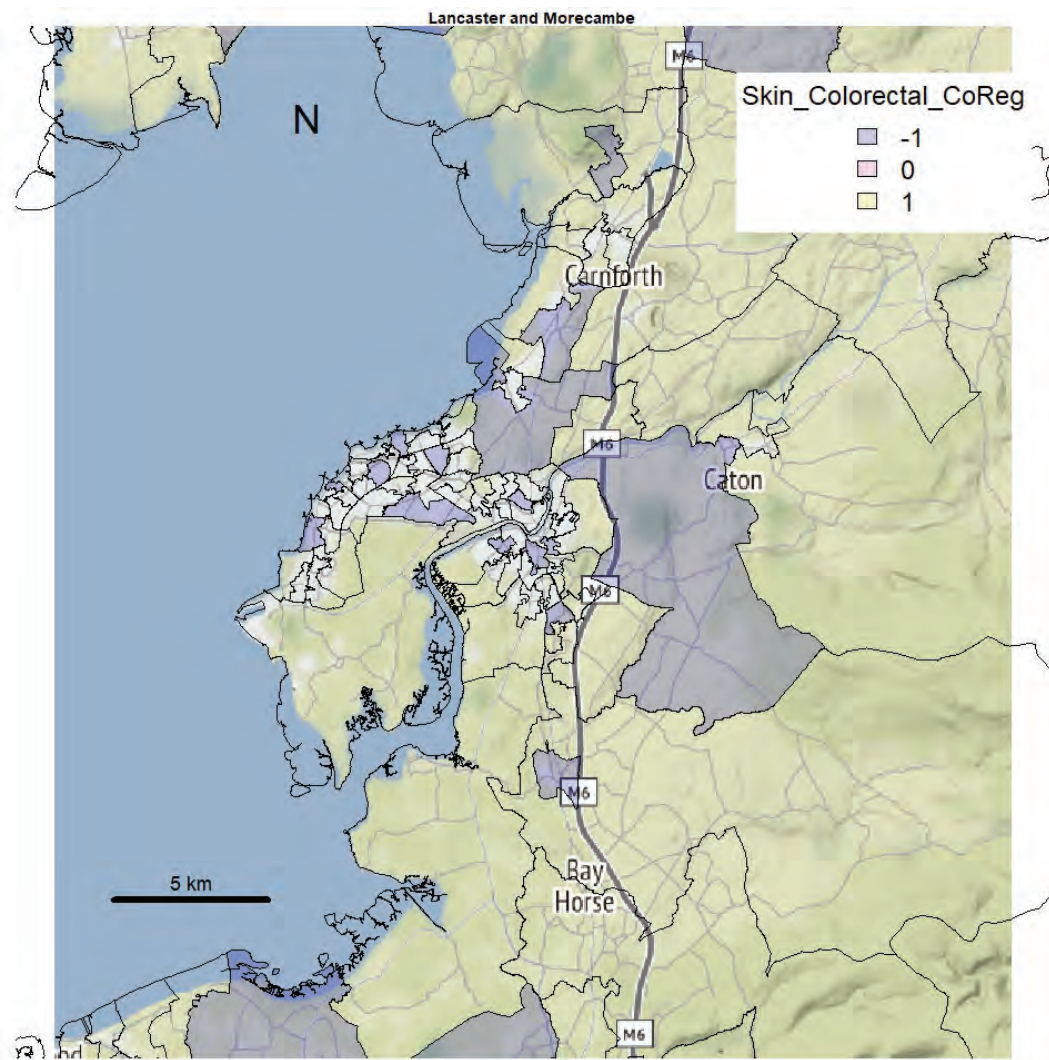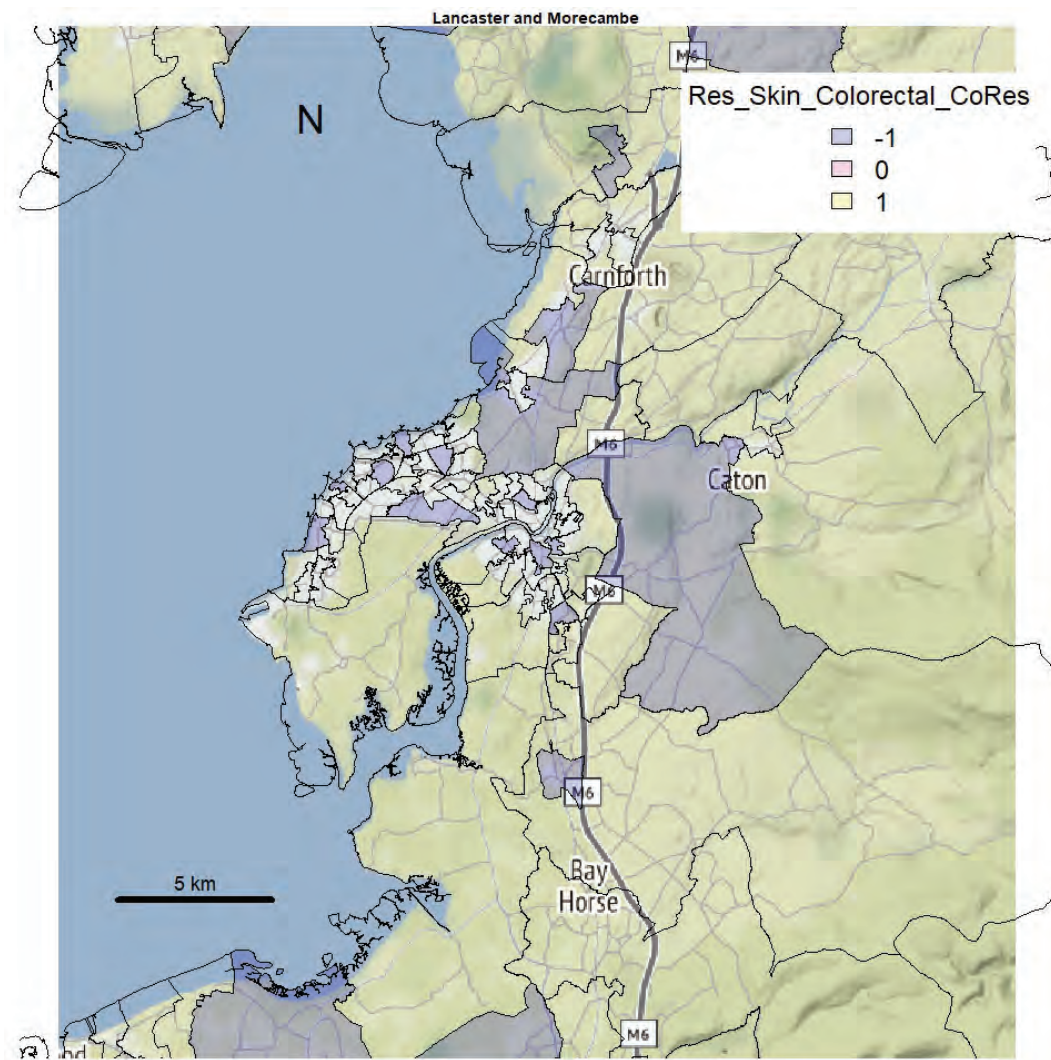



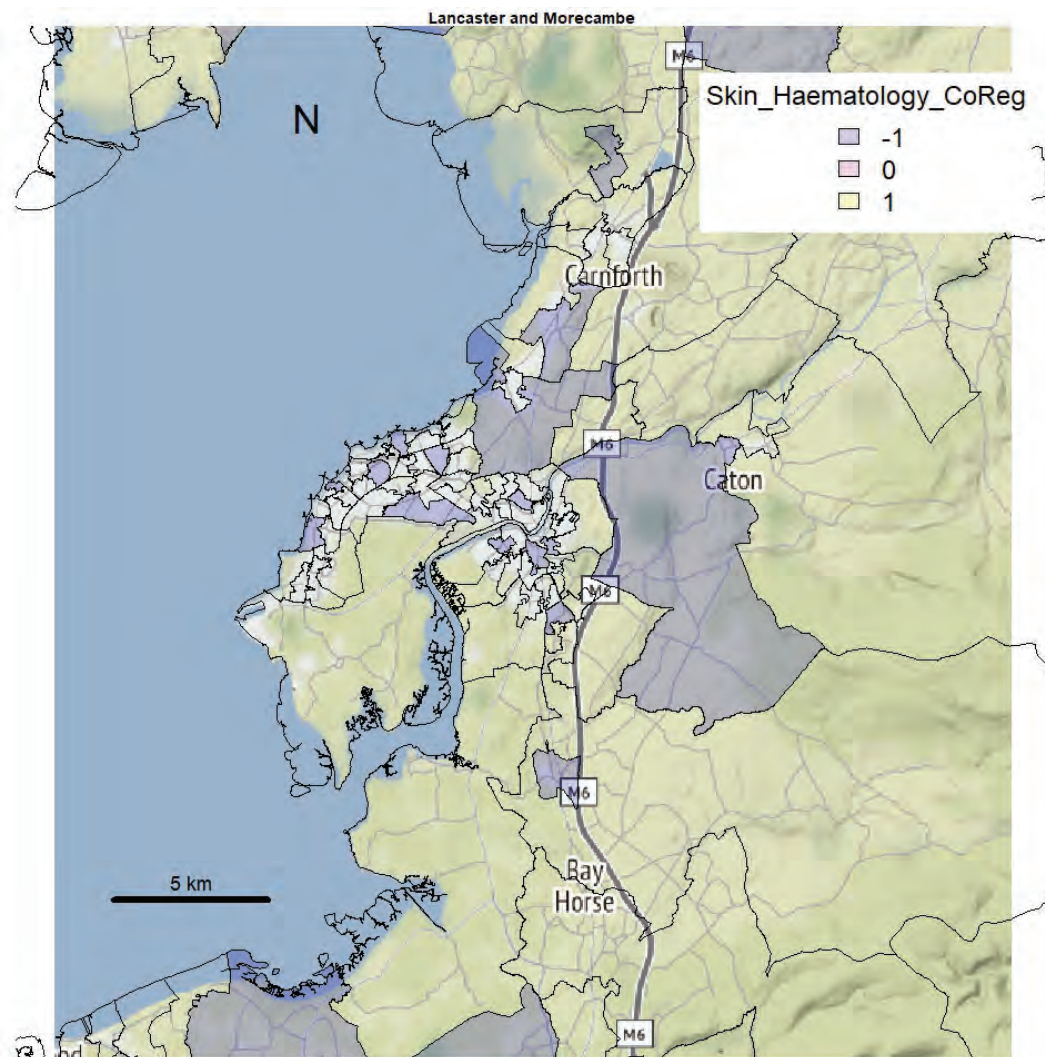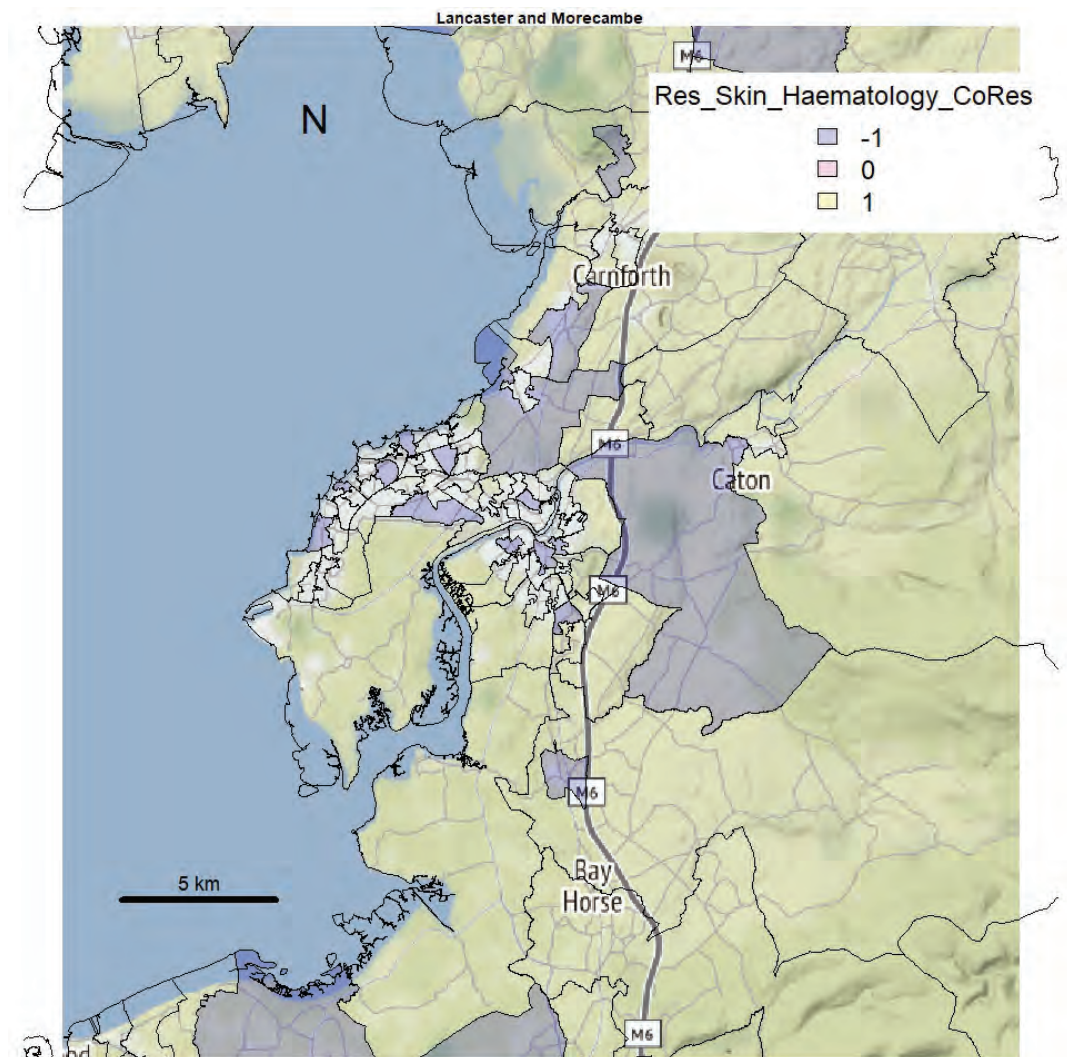

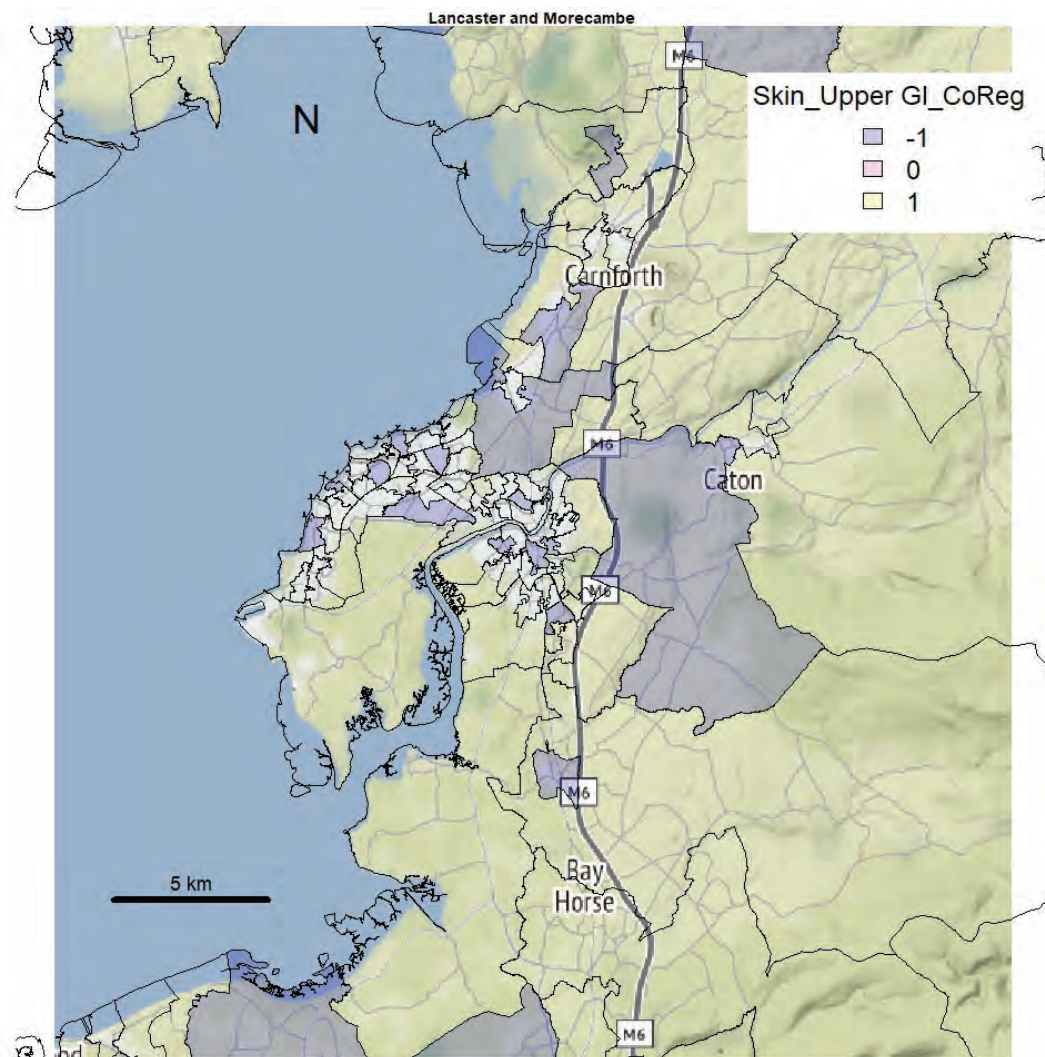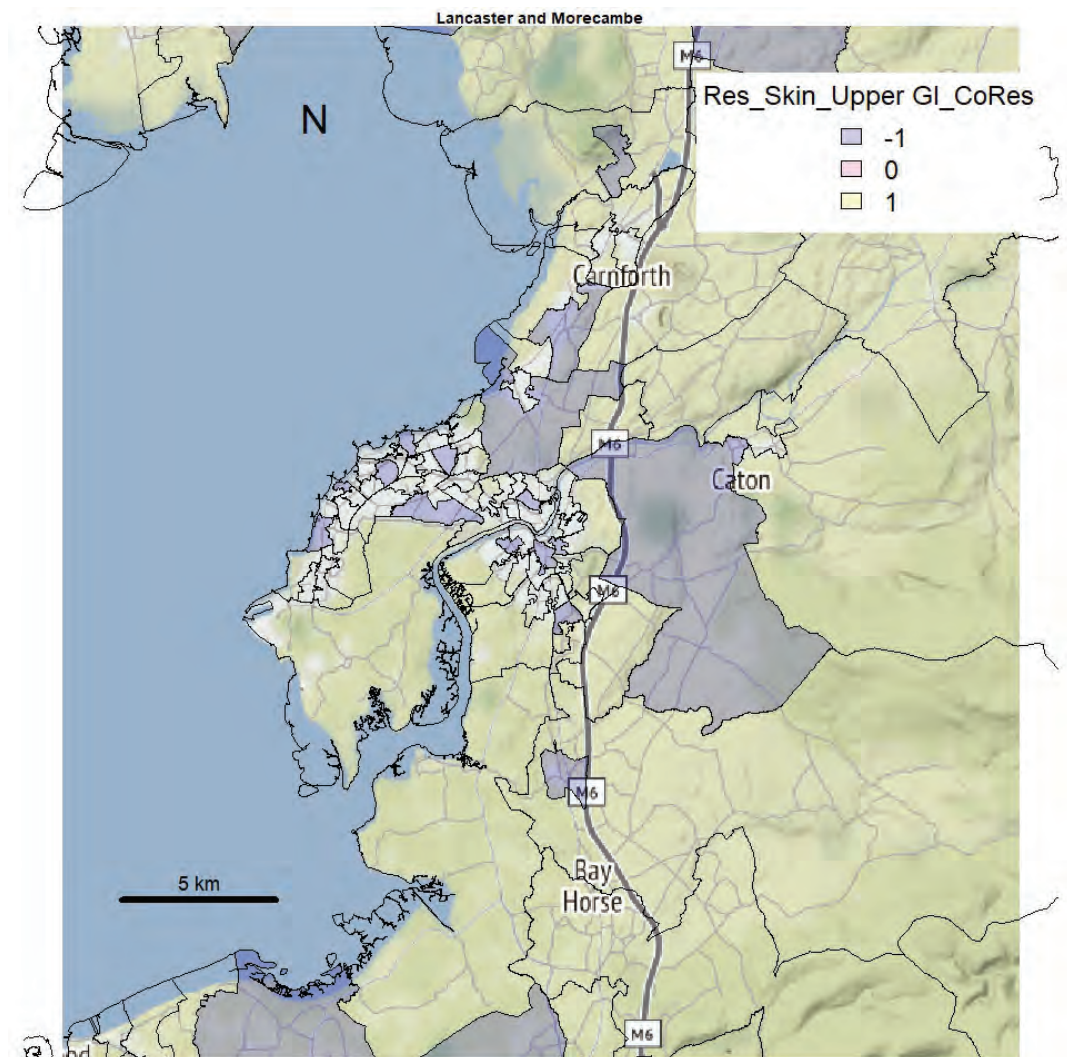

Lancaster and Morecambe

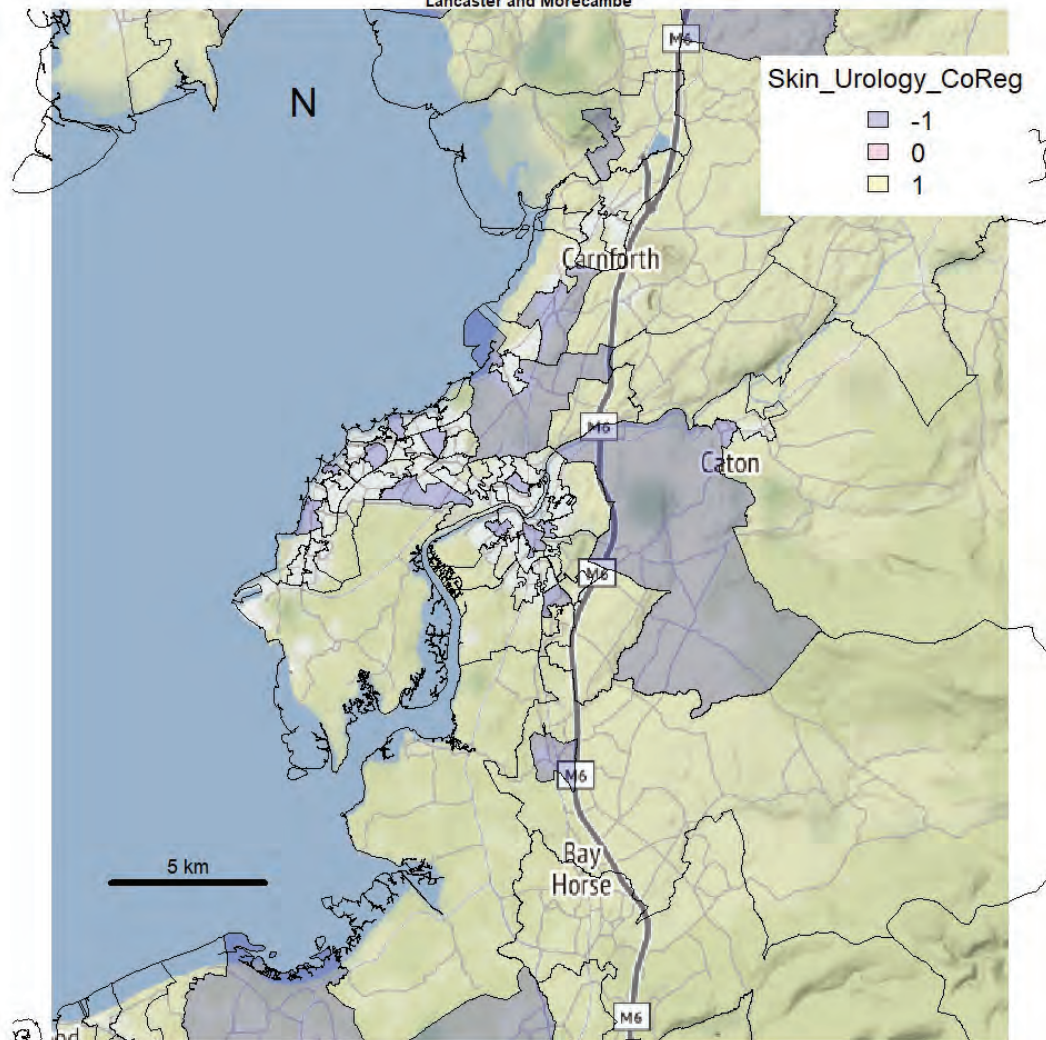

Lancaster and Morecambe

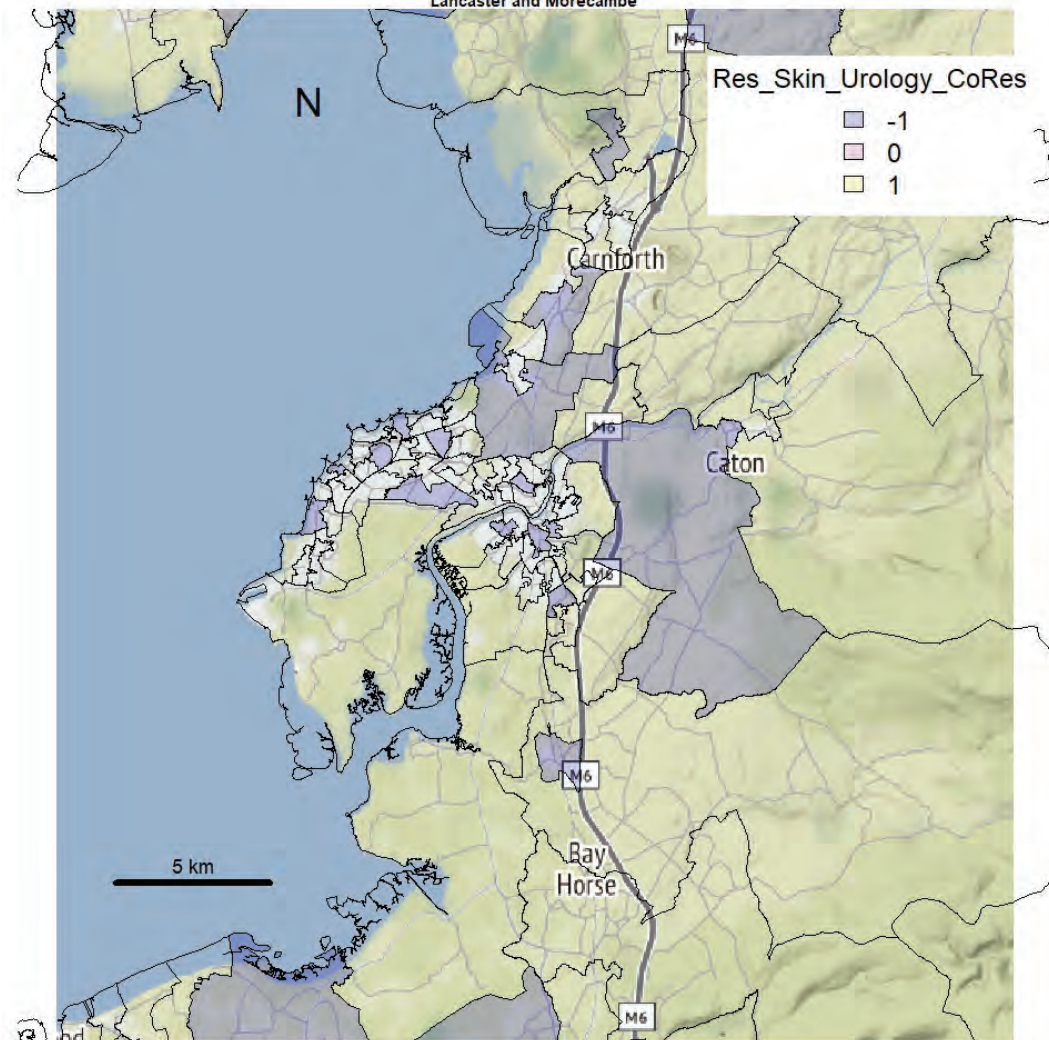

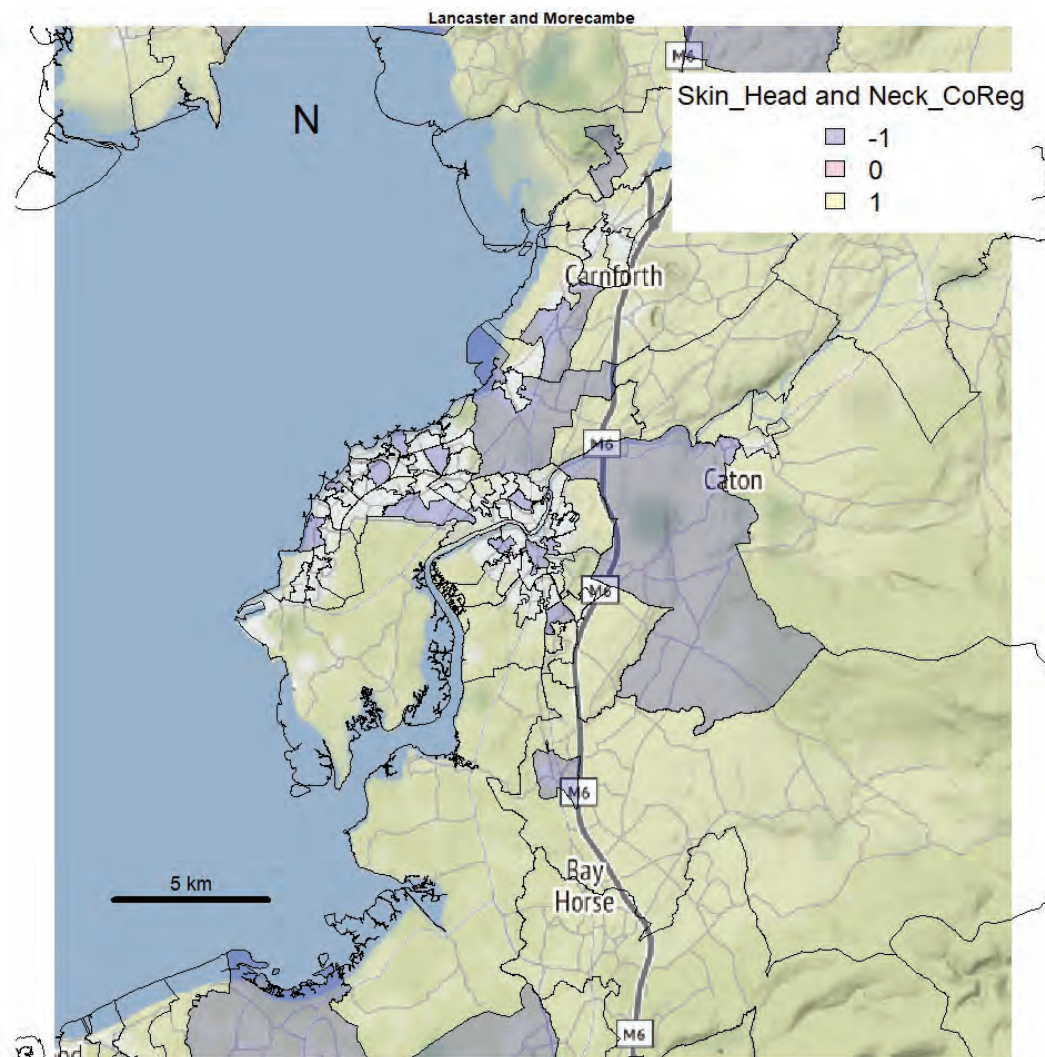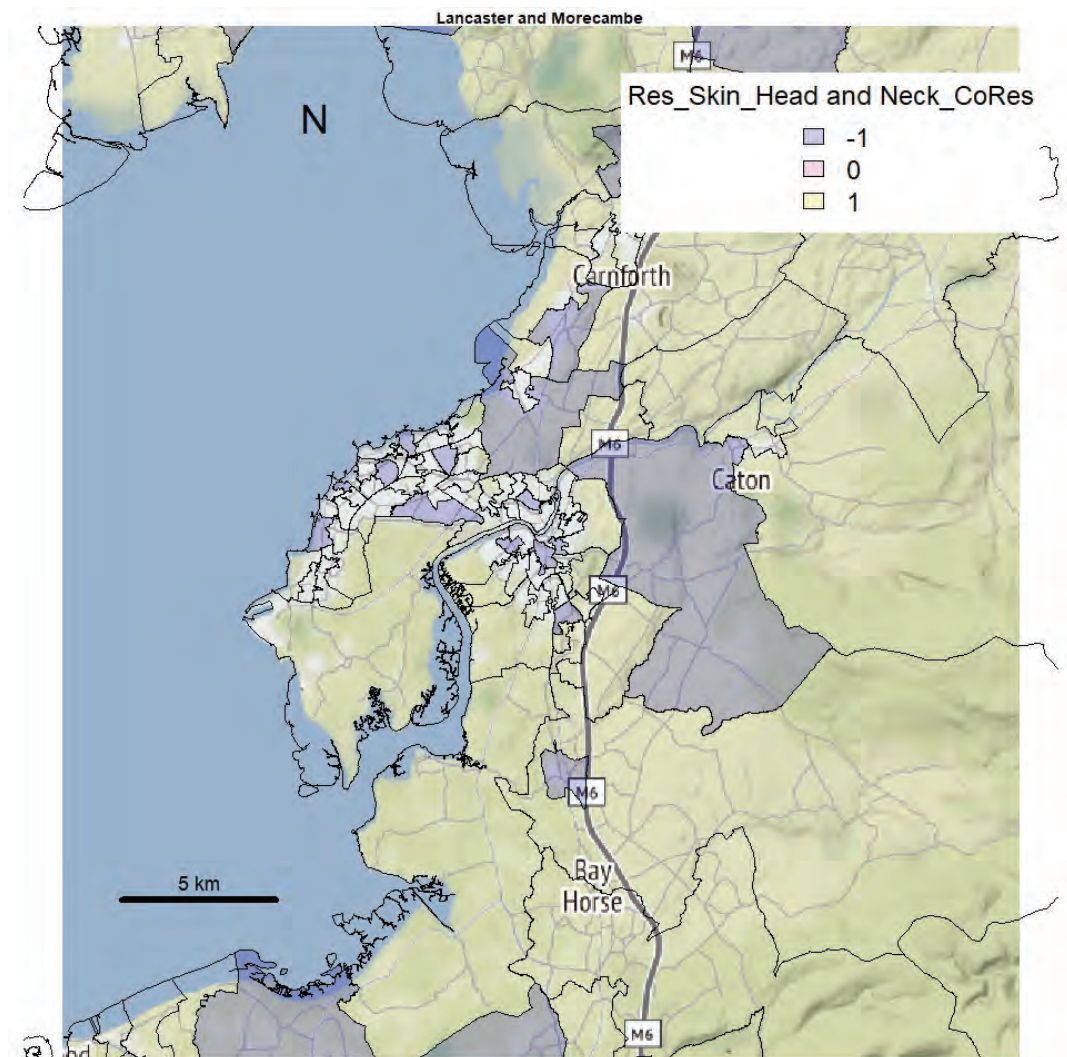

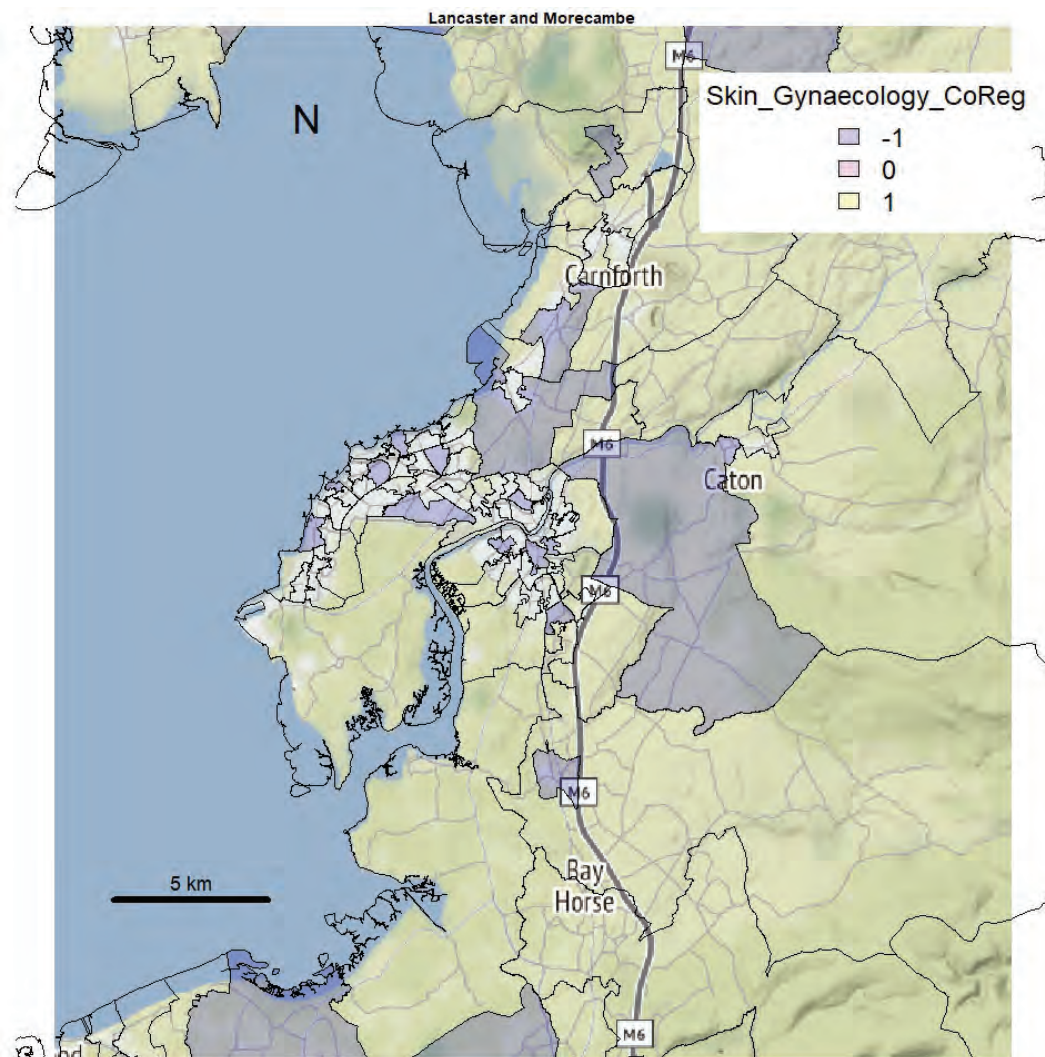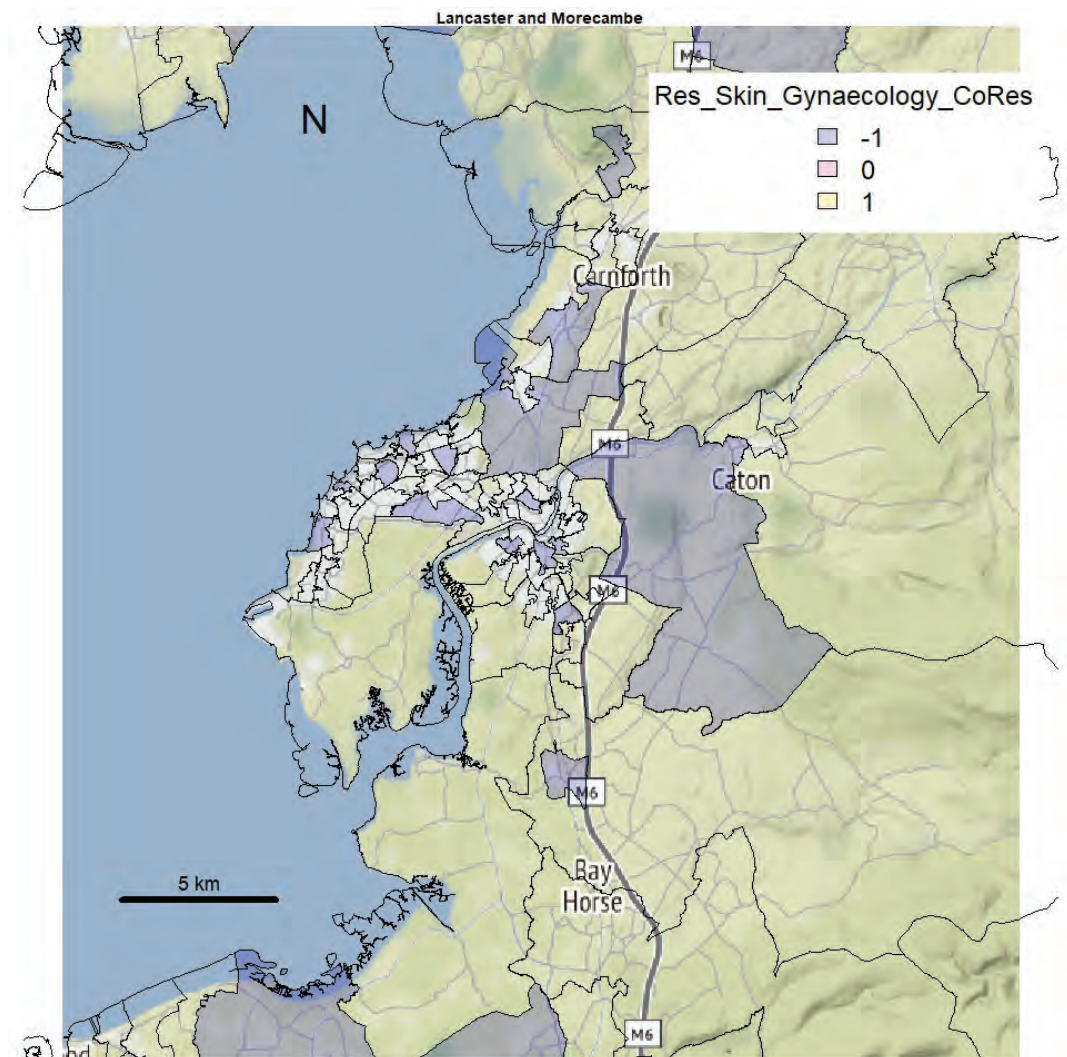

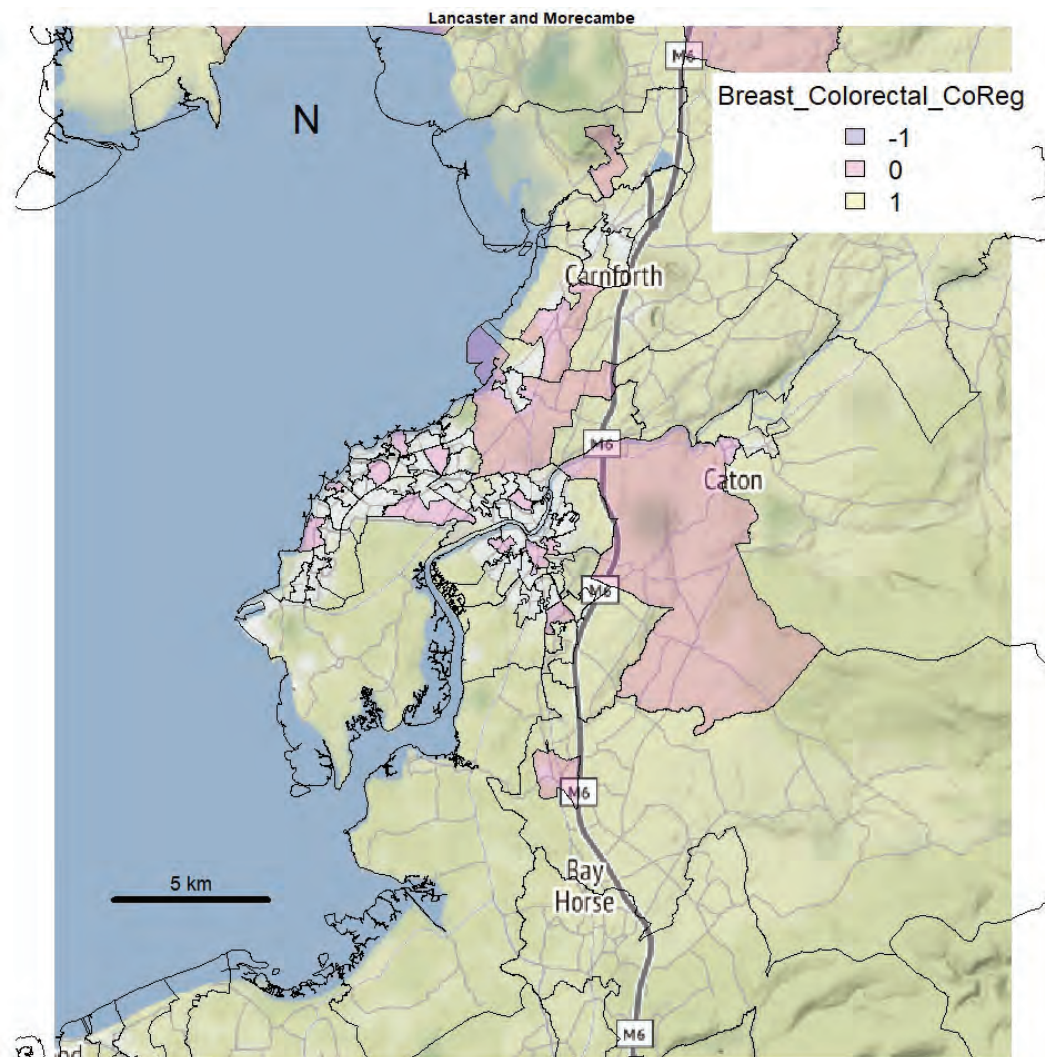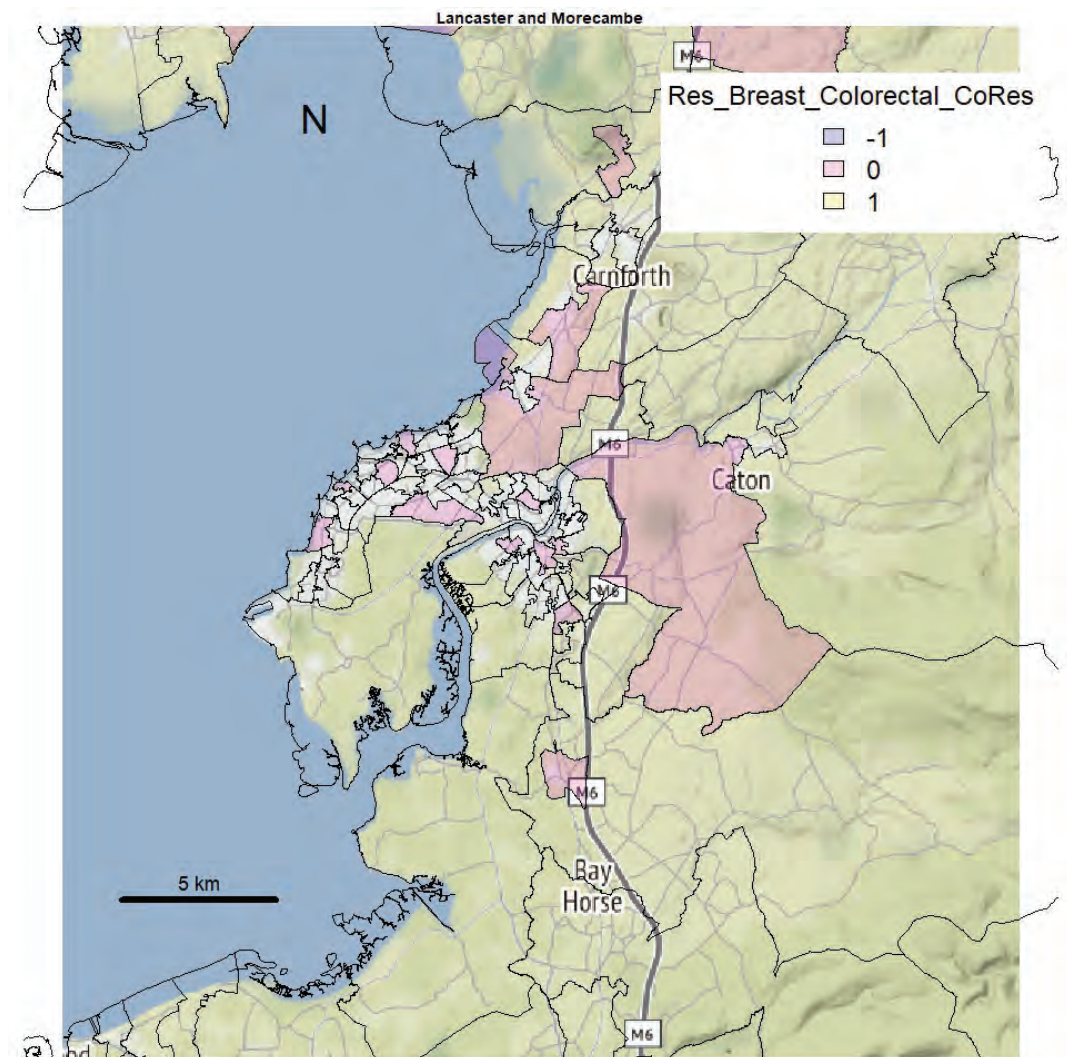

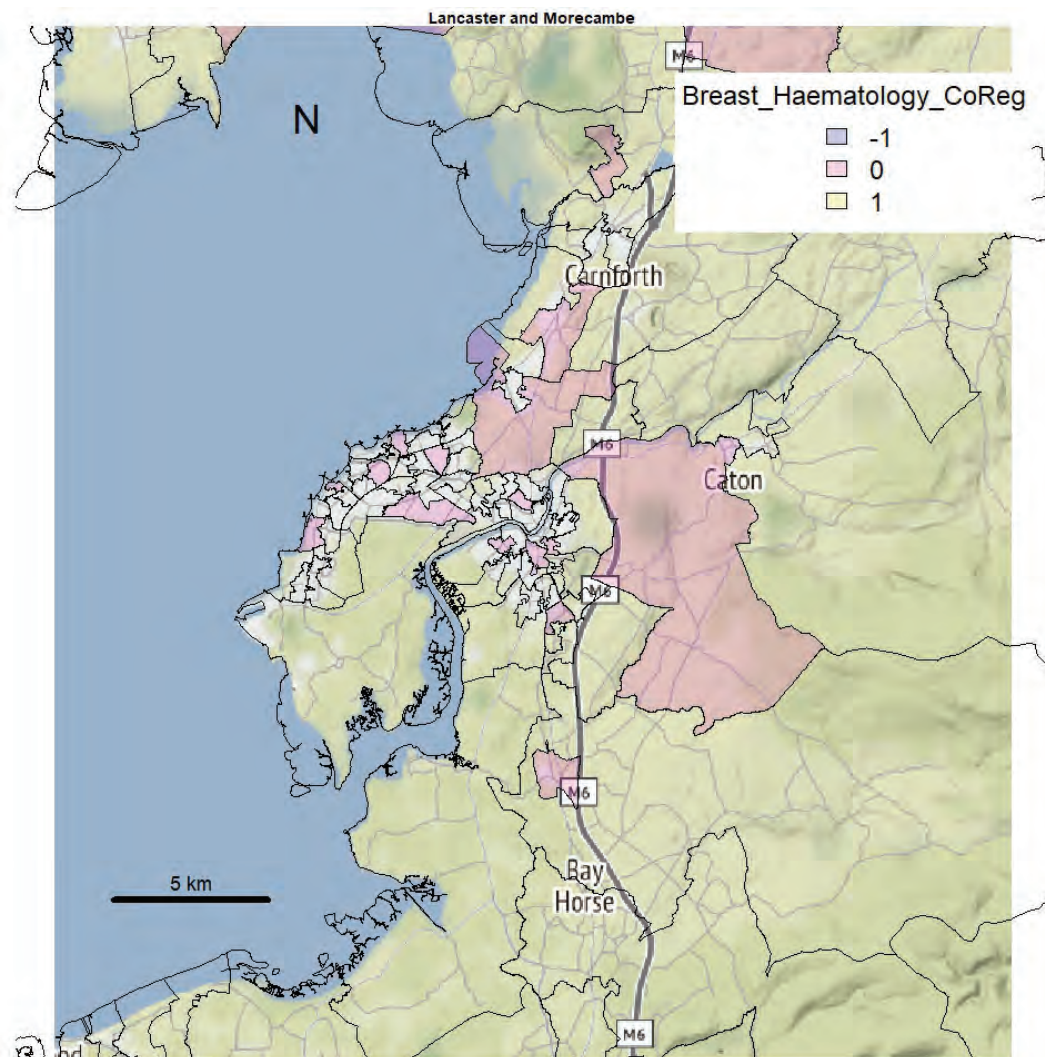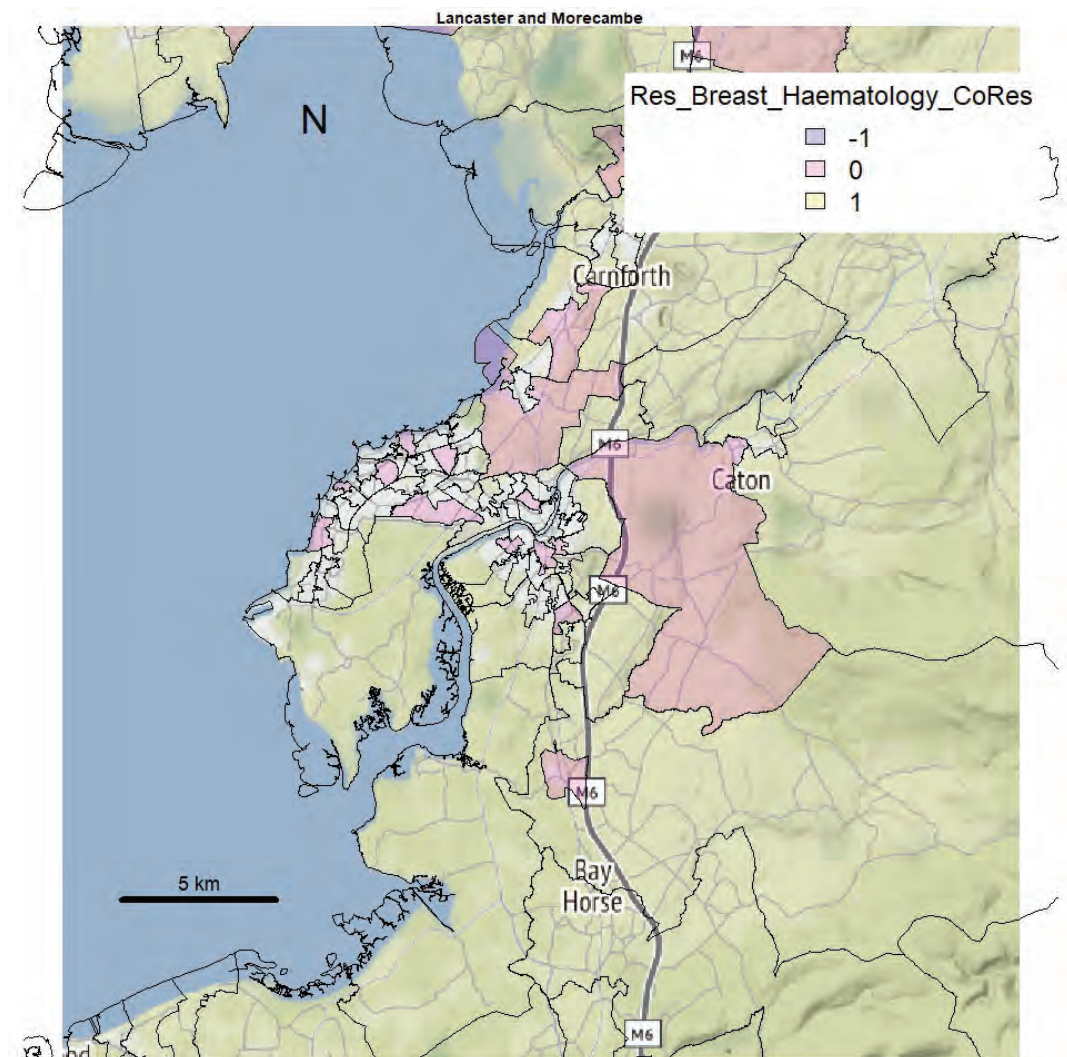

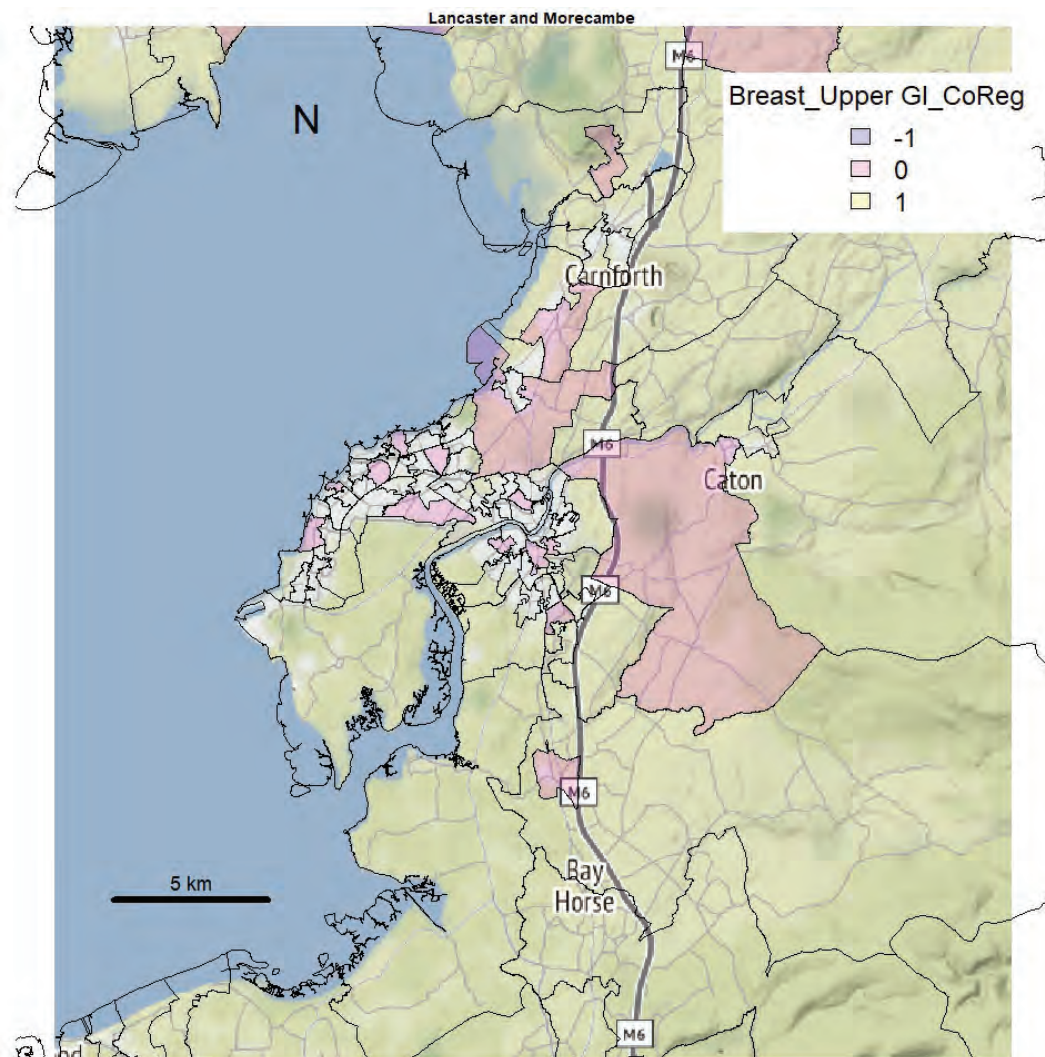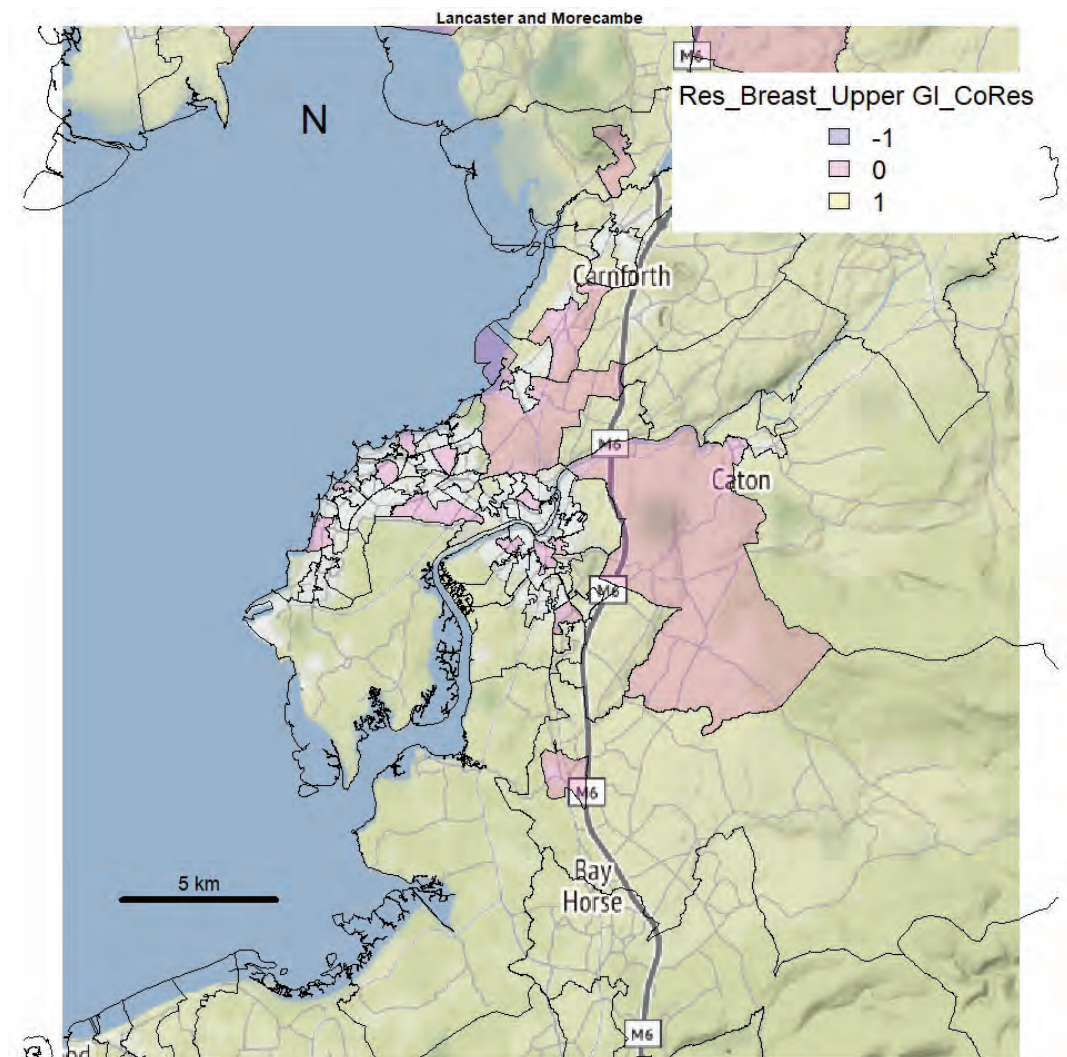



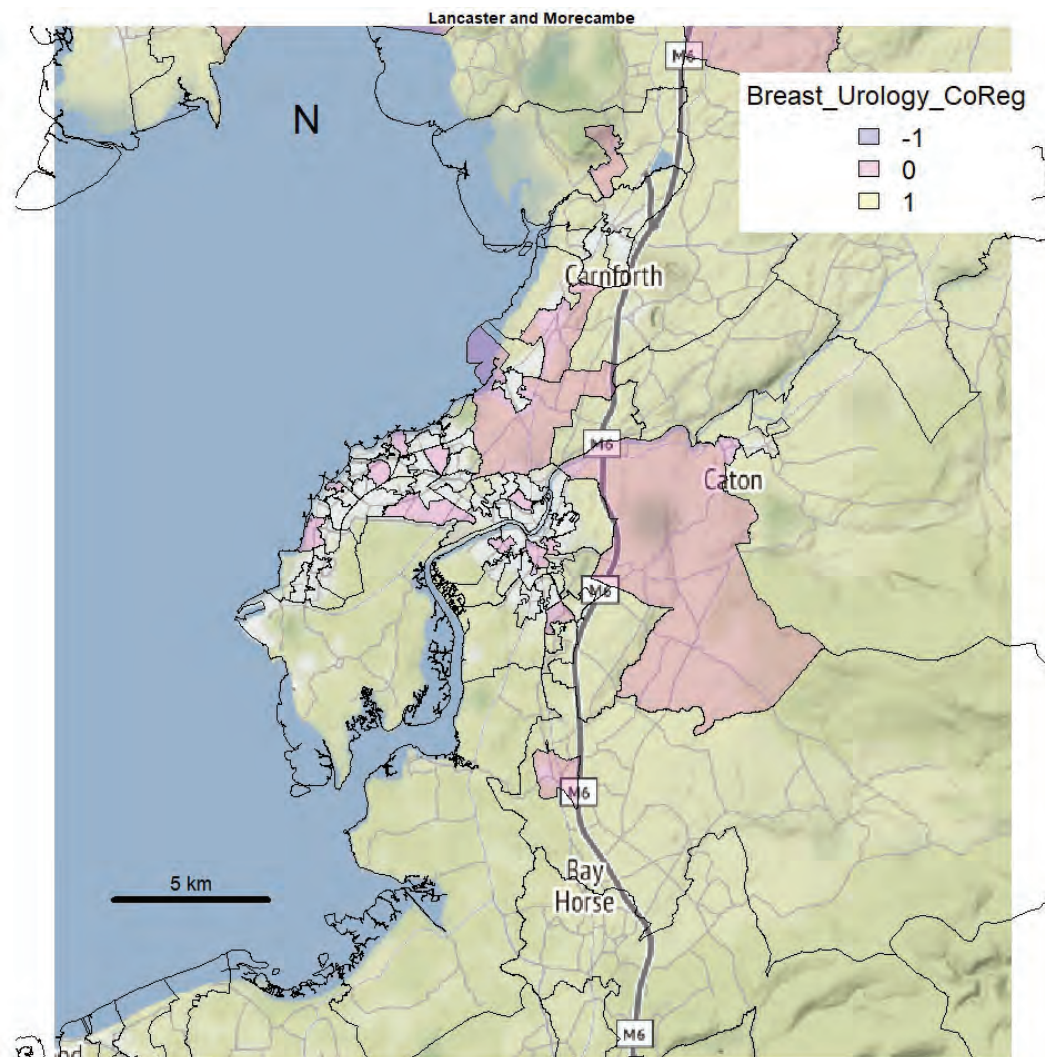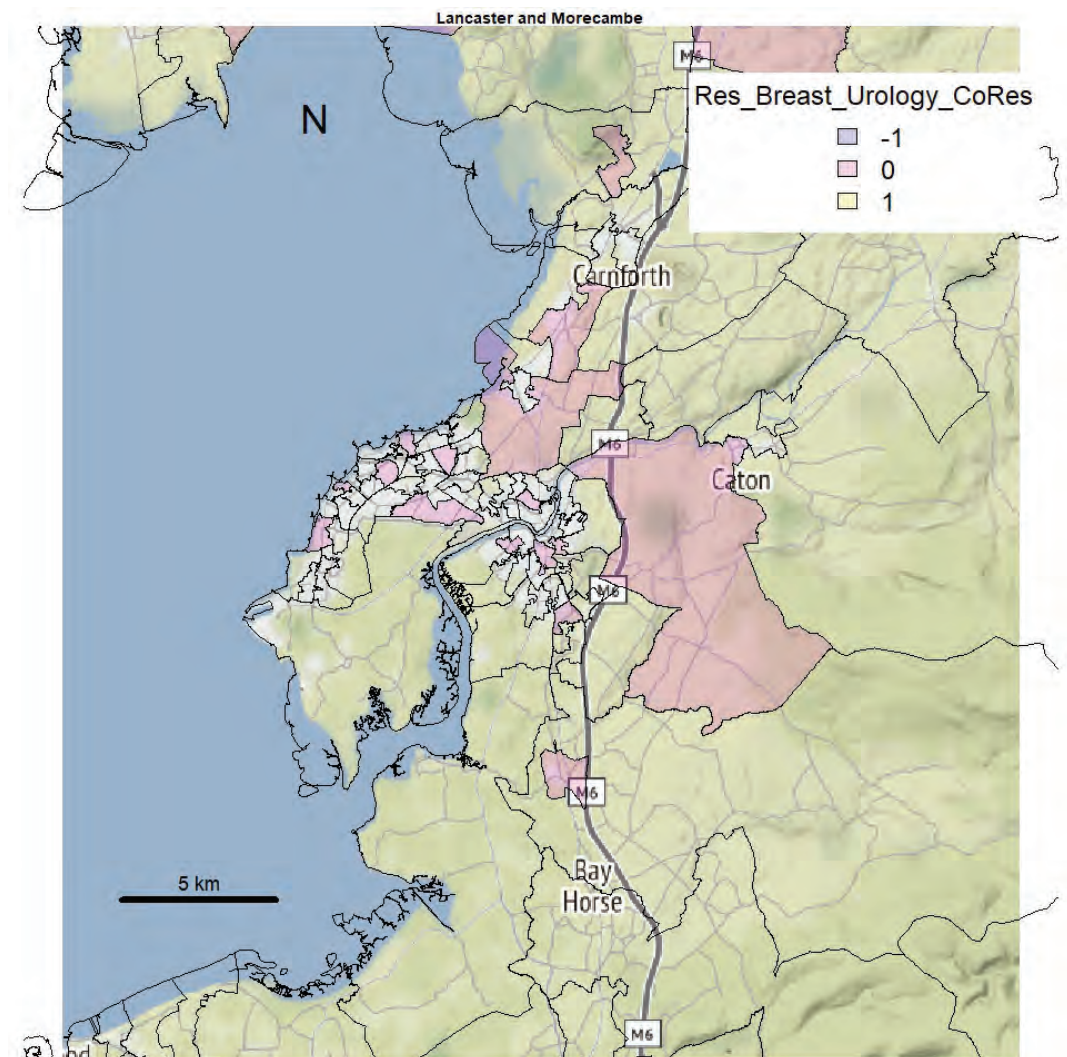

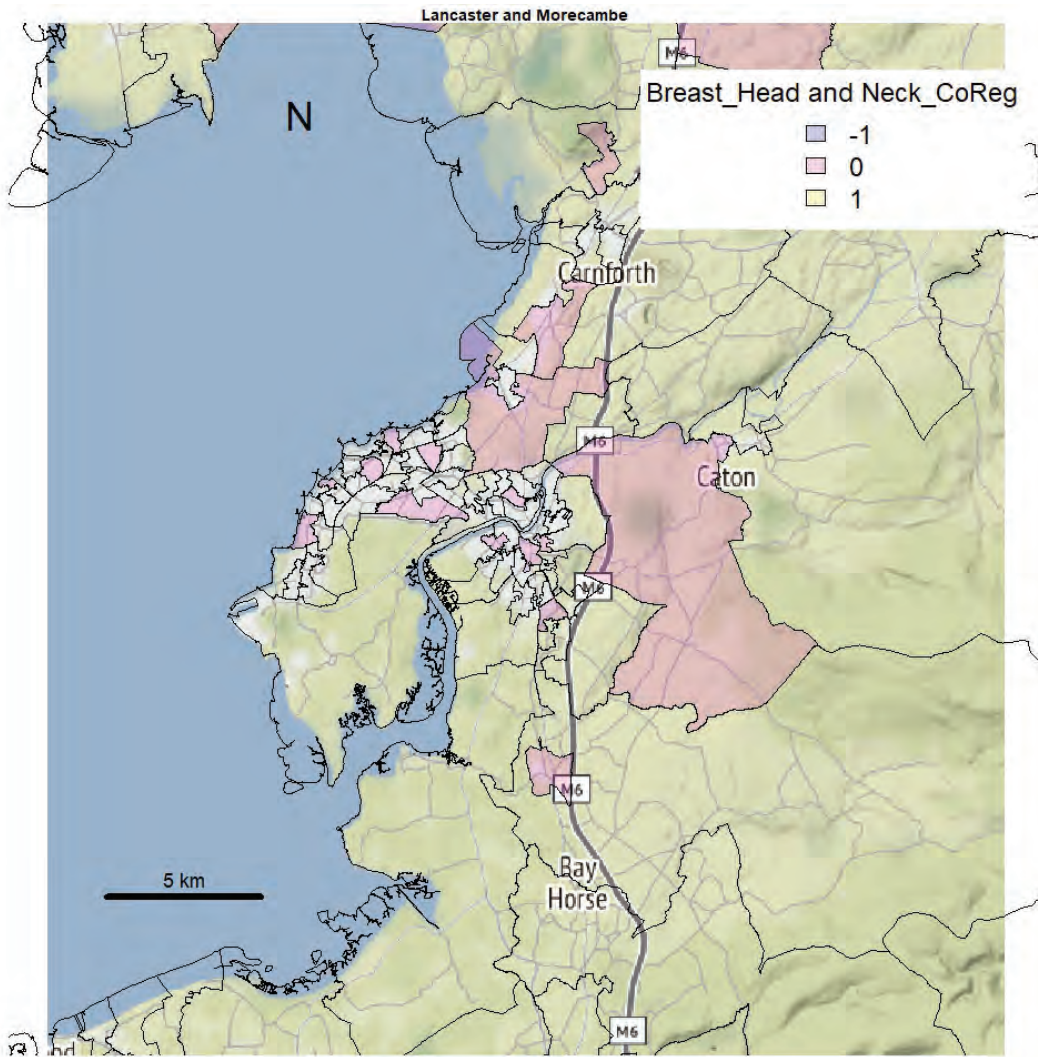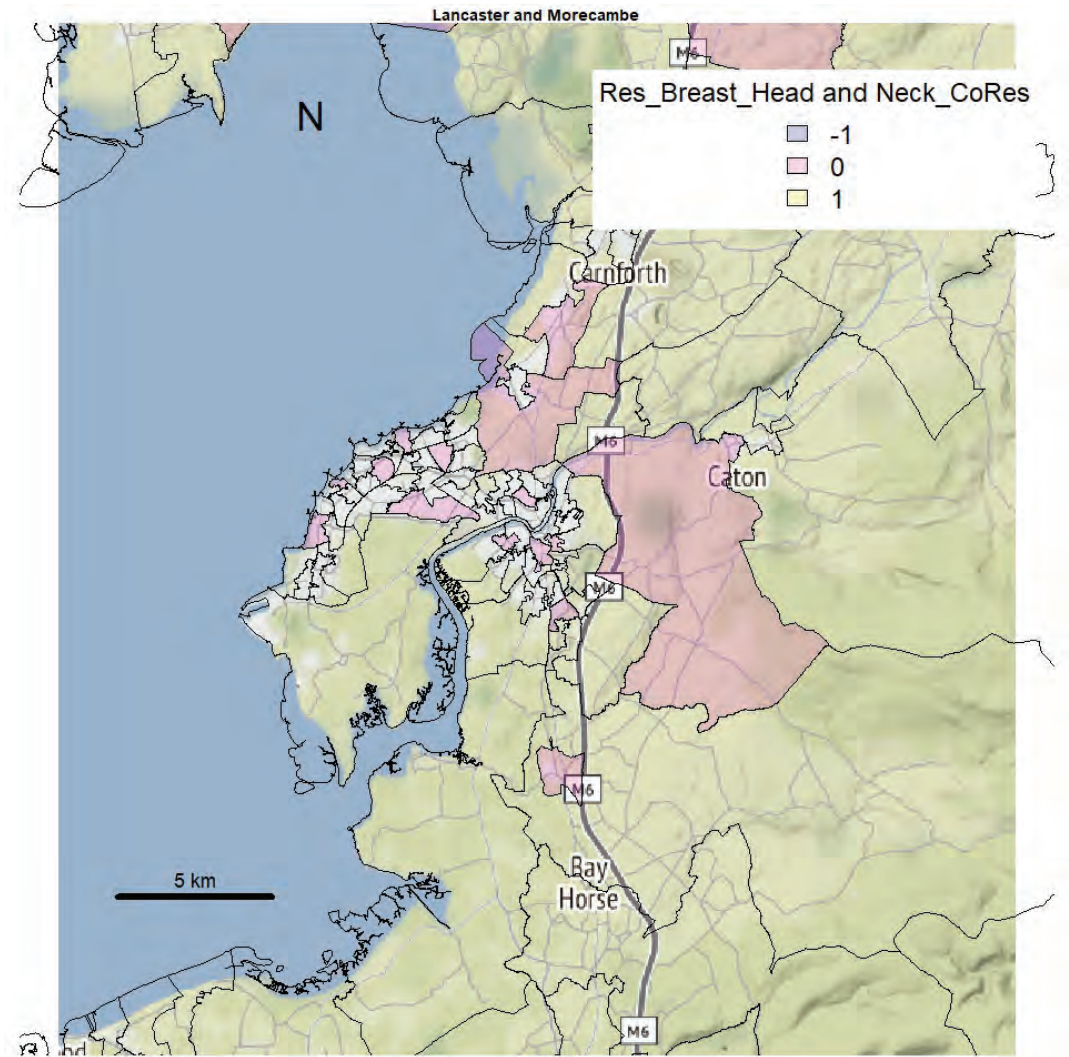

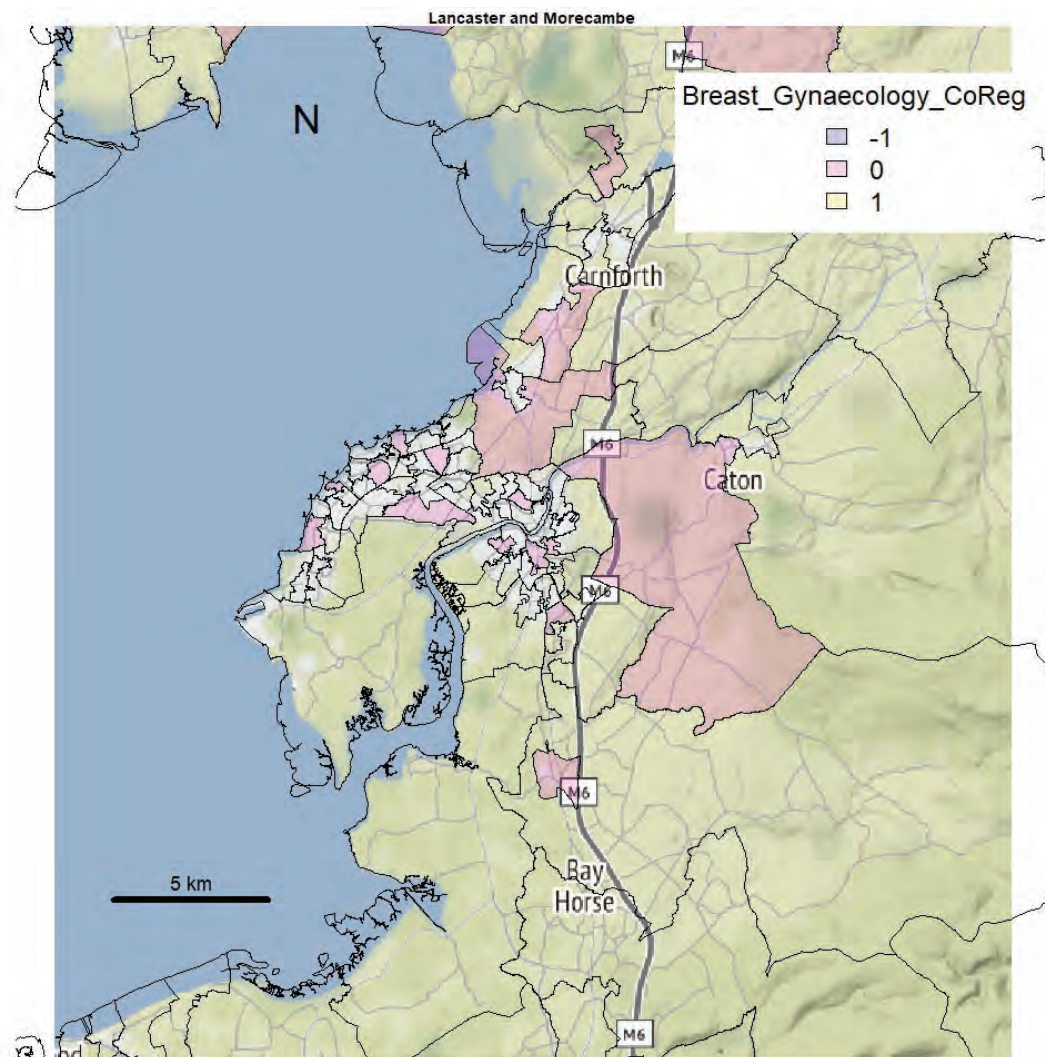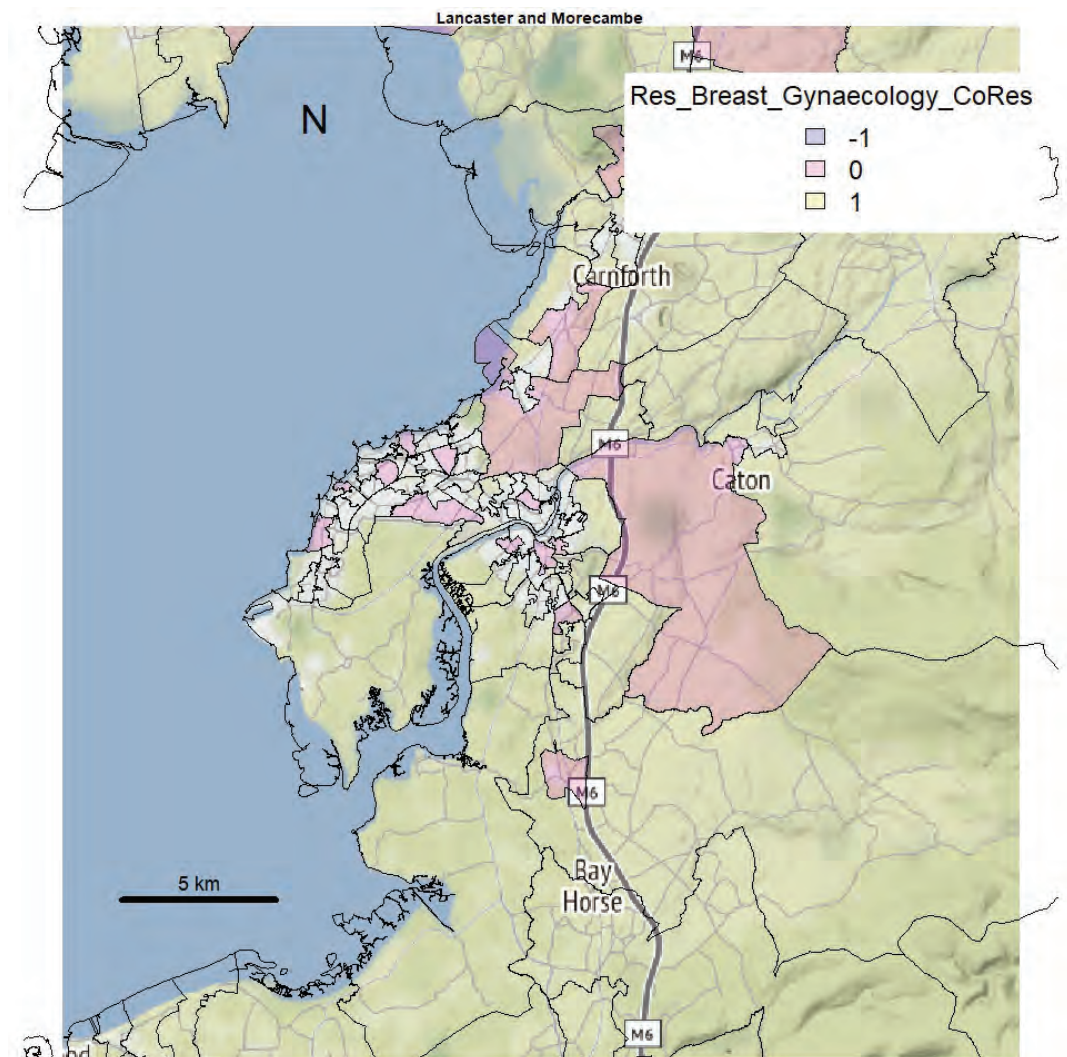

Lancaster and Morecambe

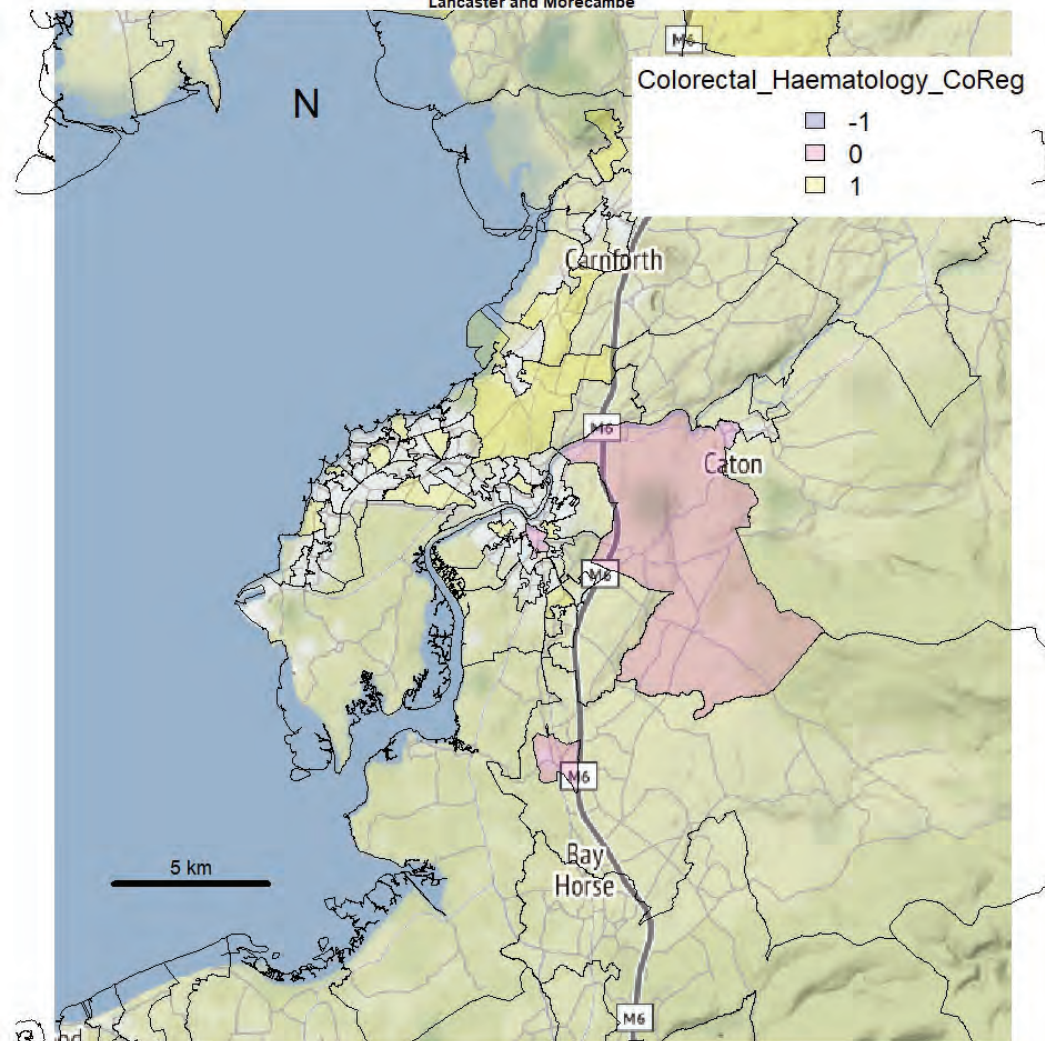

Lancaster and Morecambe

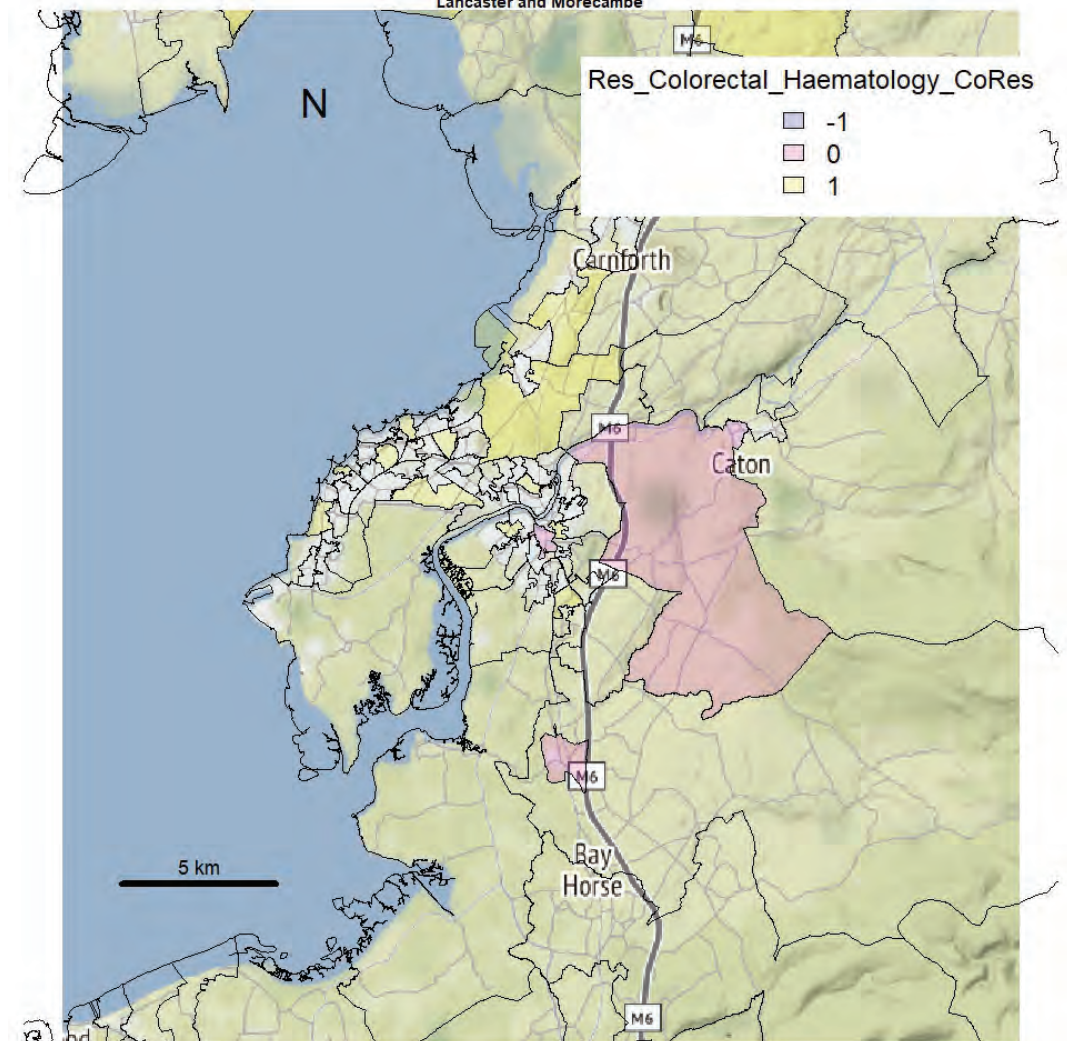

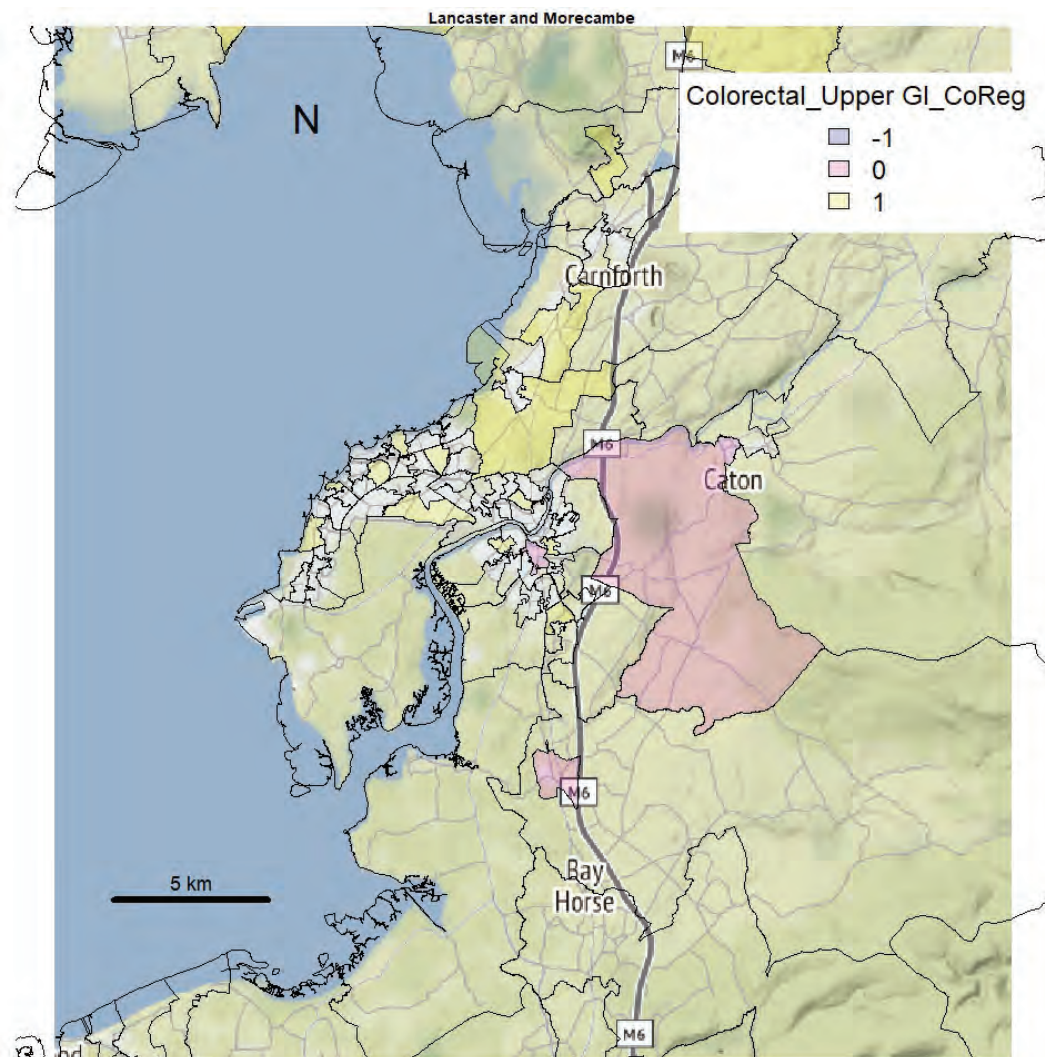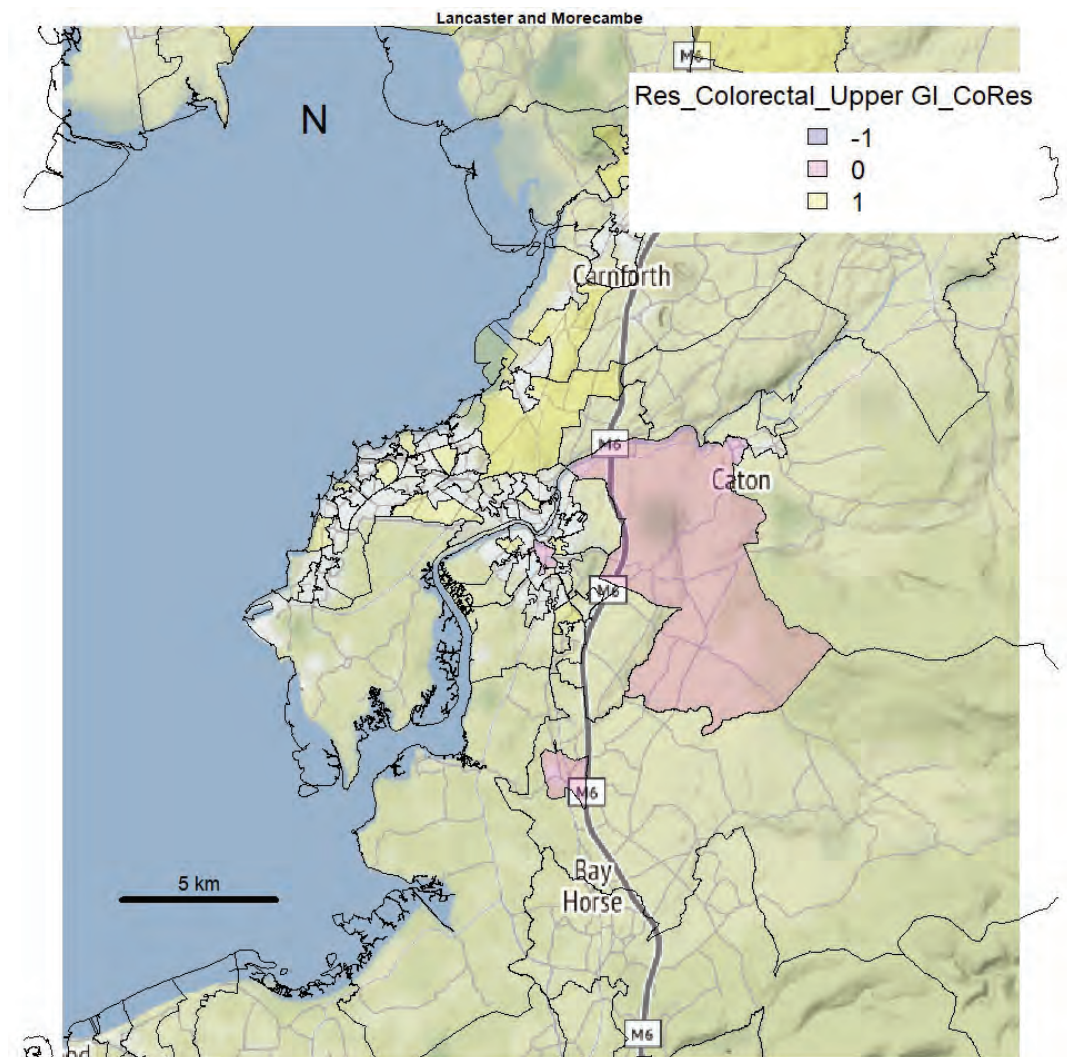

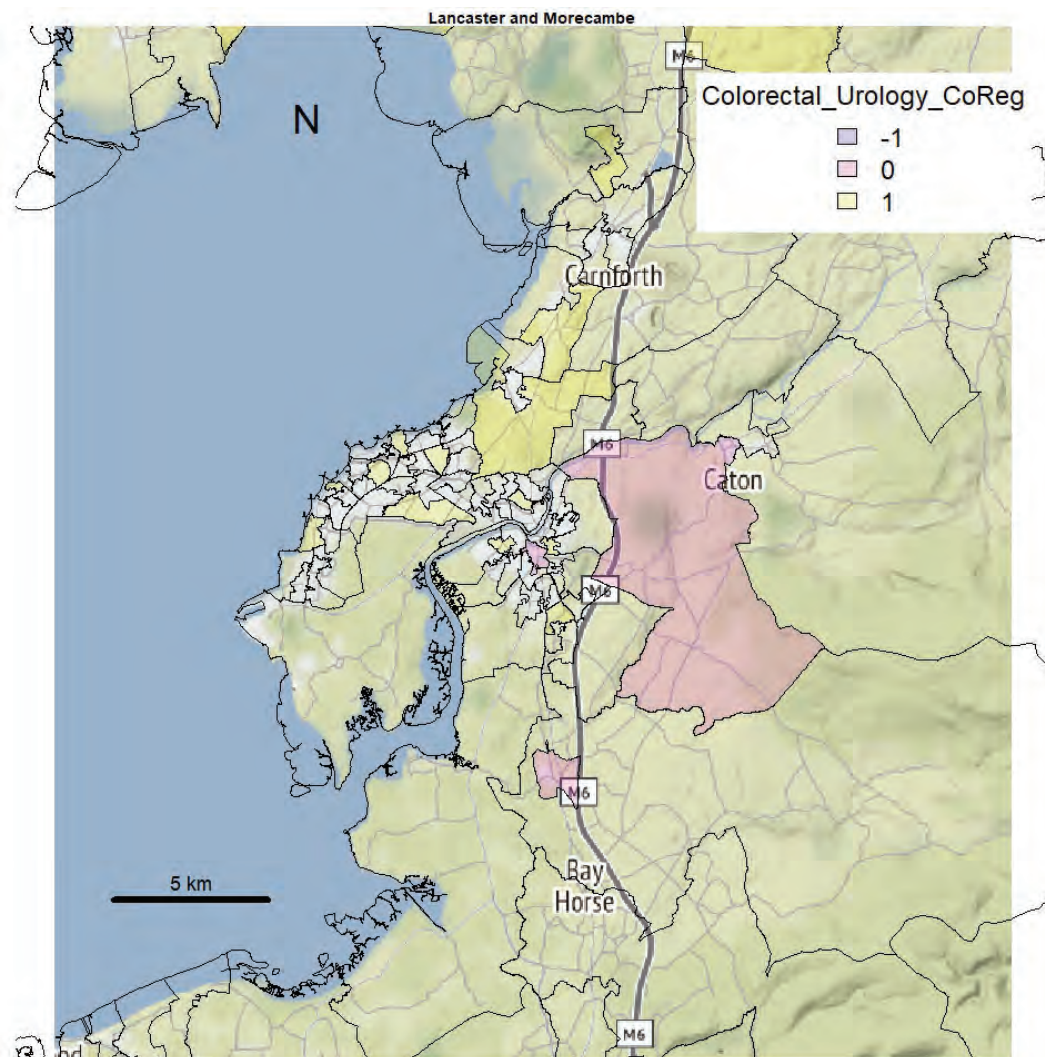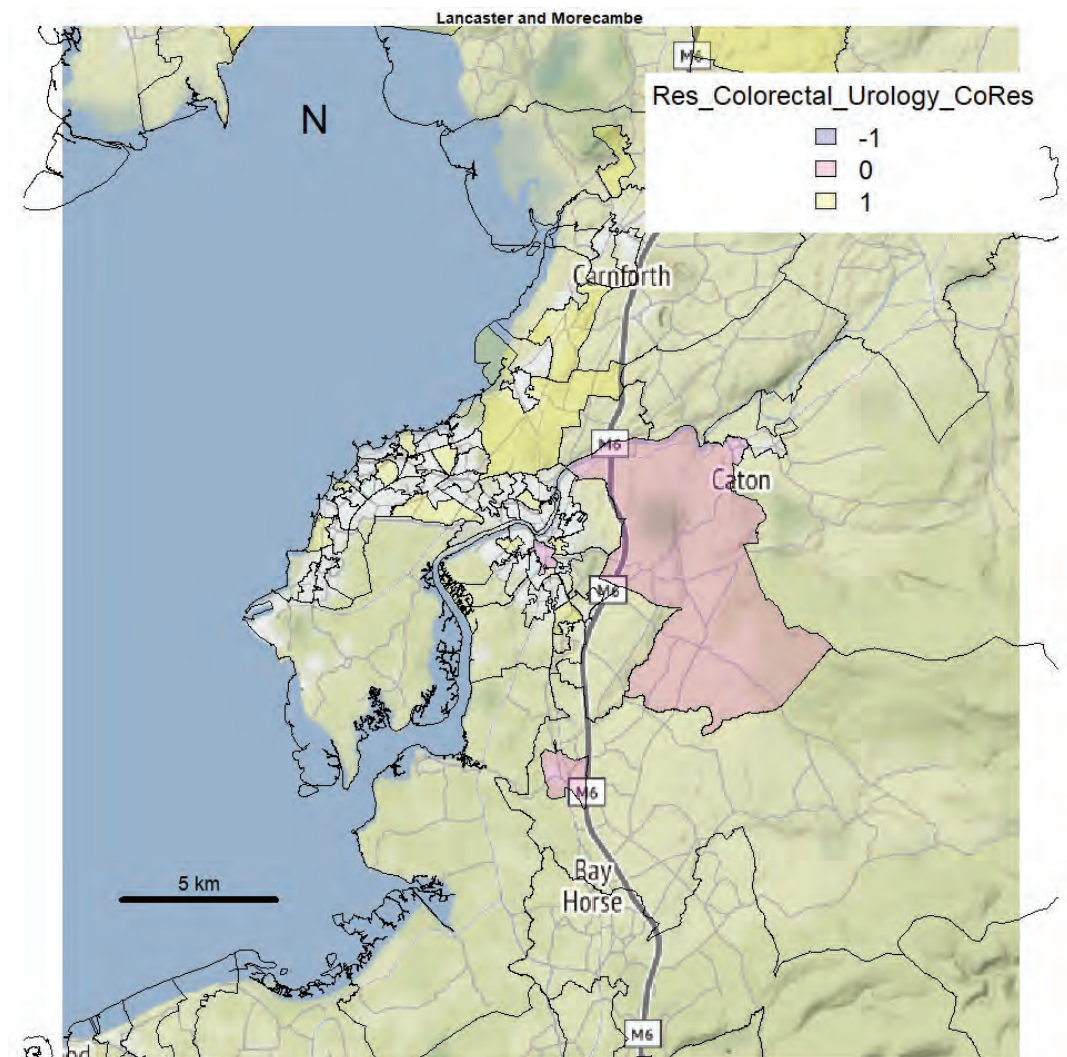

Lancaster and Morecambe

Colorectal\_Head and Neck\_CoReg

- 1
- 0
- 1

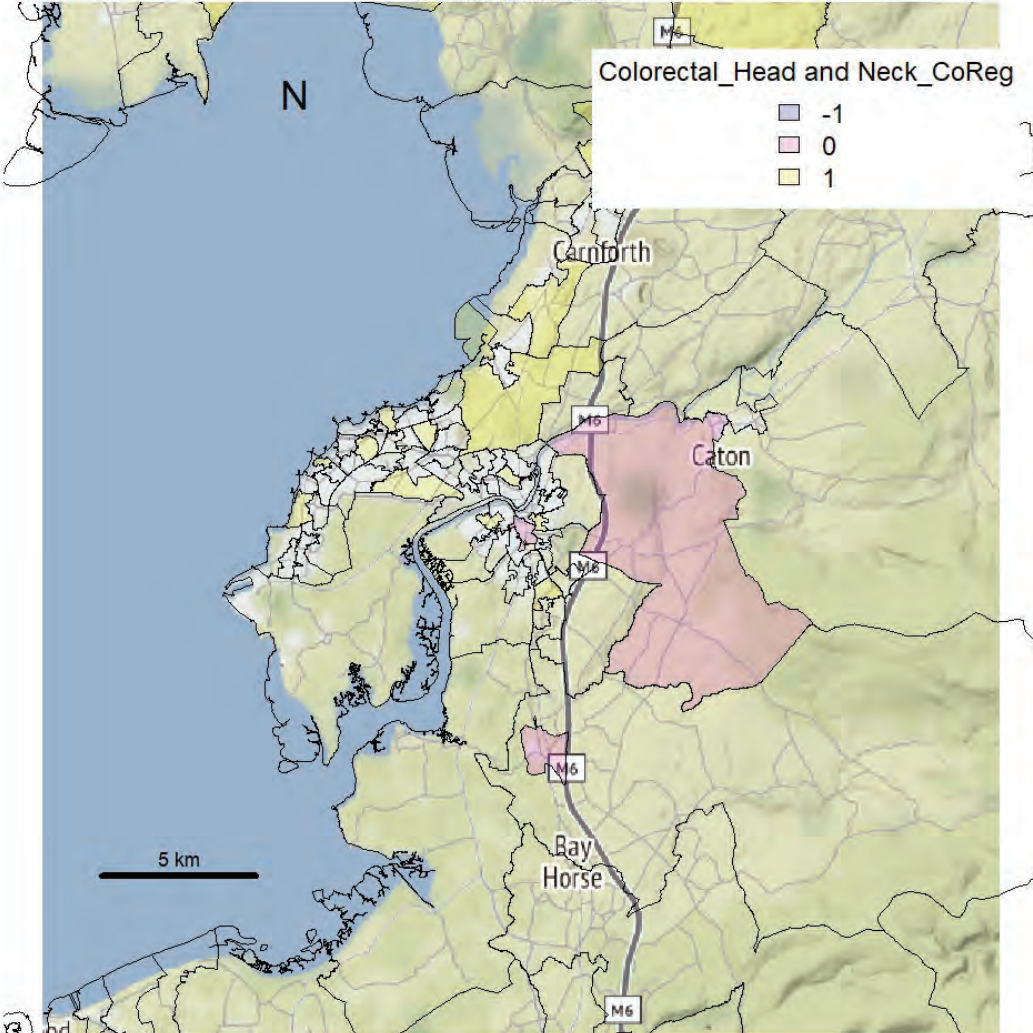

Lancaster and Morecambe

Res\_Colorectal\_Head and Neck\_CoRes

- 1
- 0
- 1

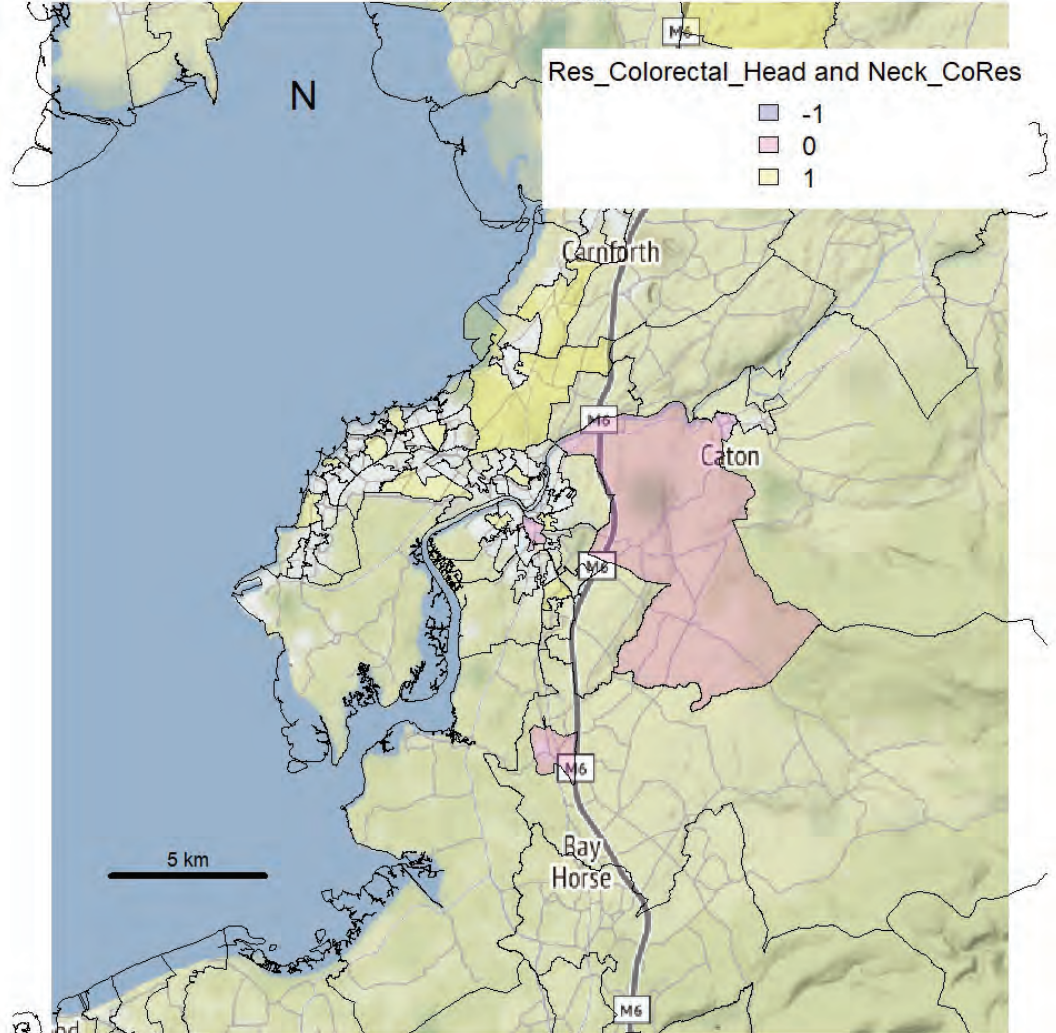

Lancaster and Morecambe

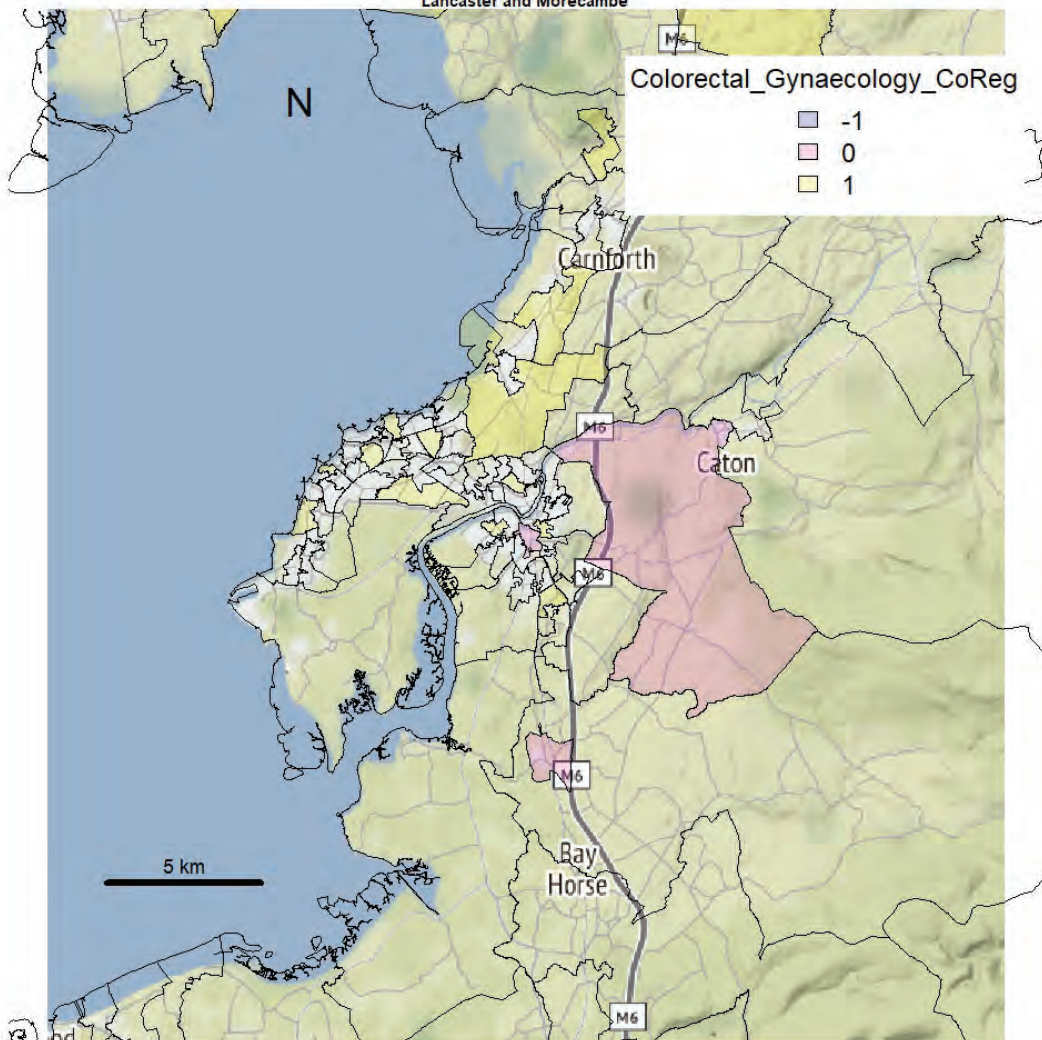

Lancaster and Morecambe

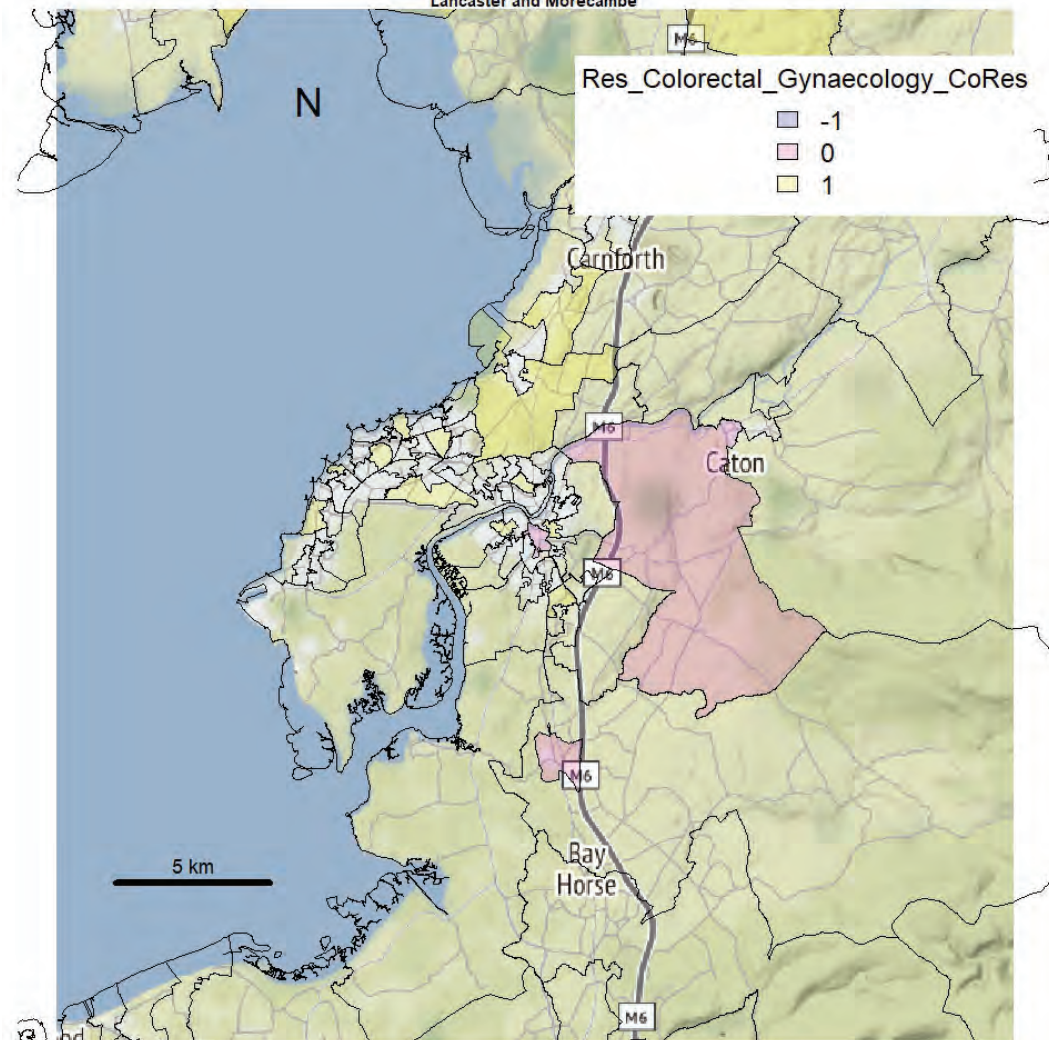



Lancaster and Morecambe

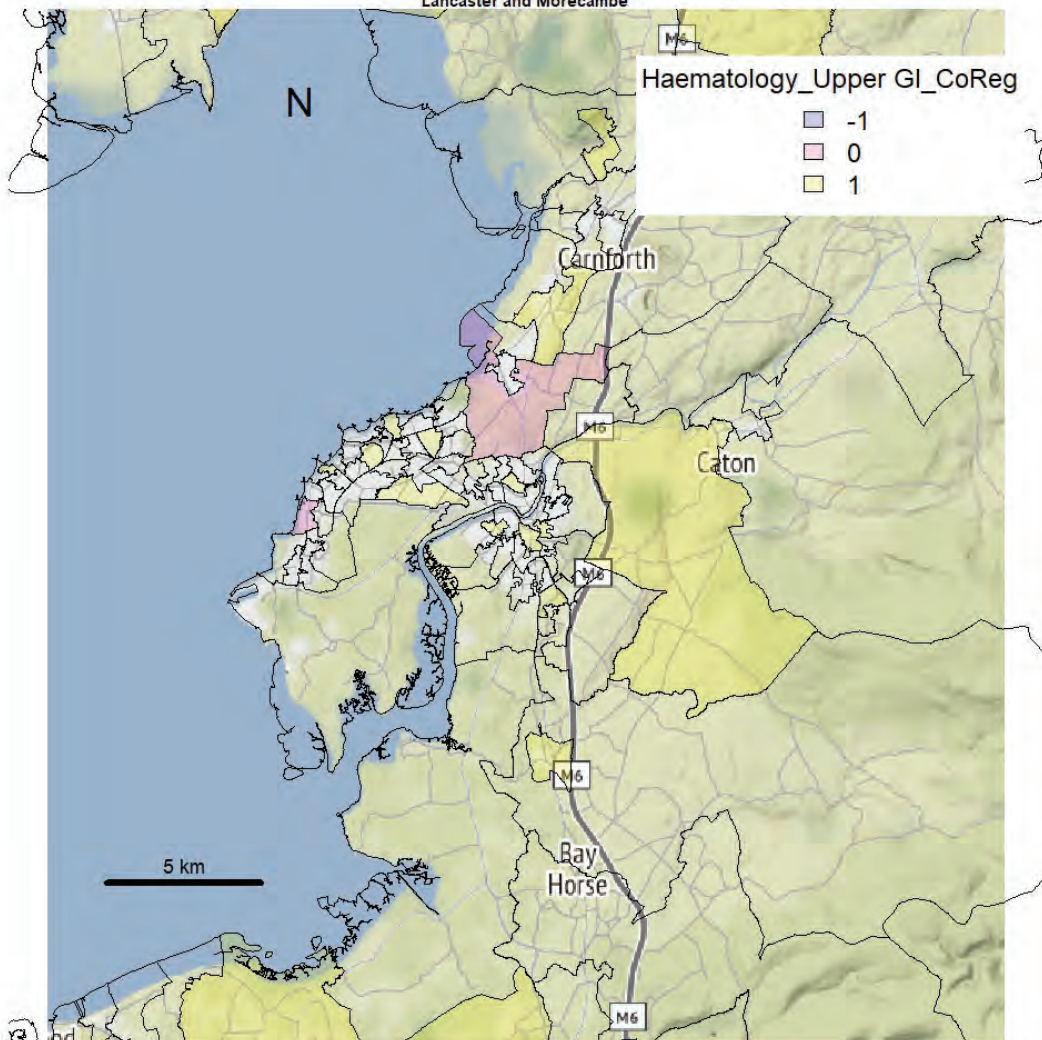

Lancaster and Morecambe

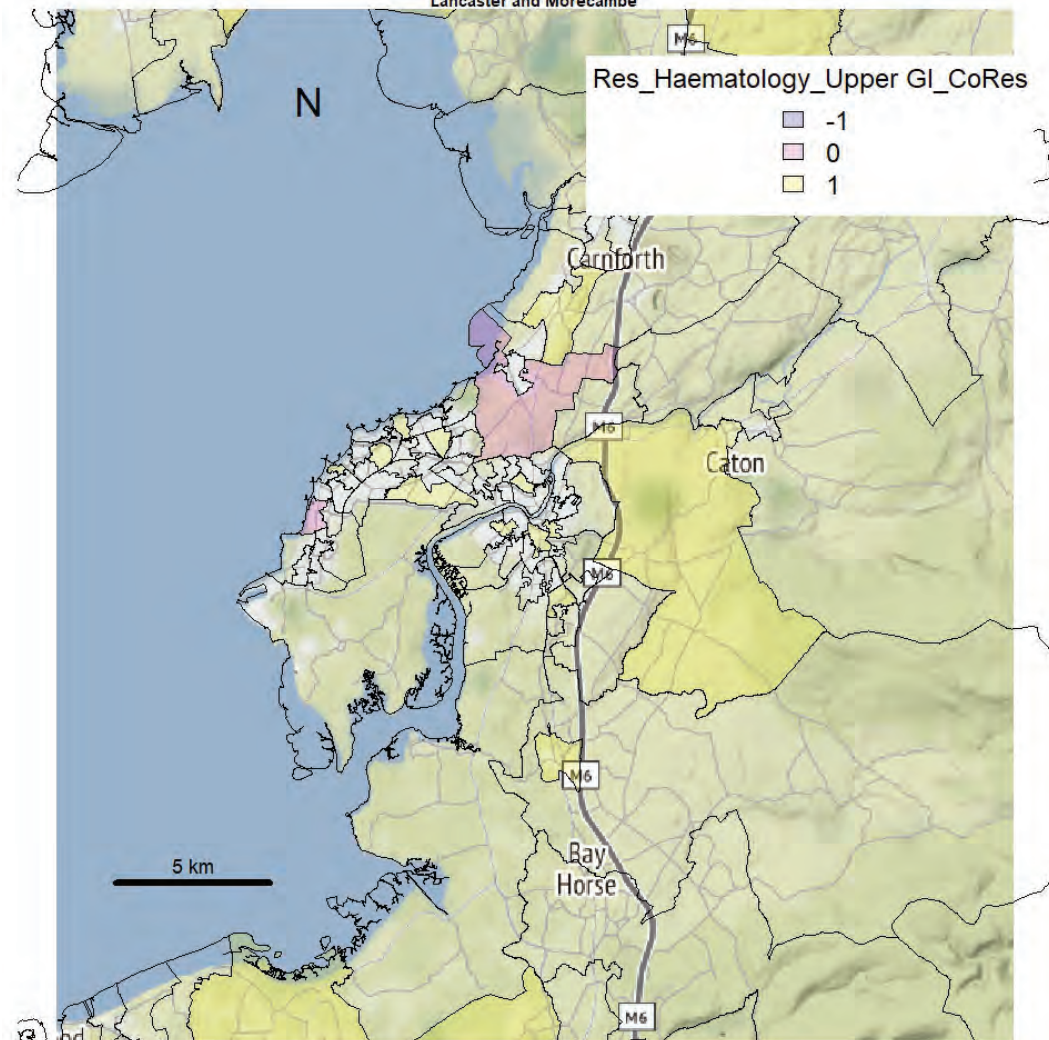

Lancaster and Morecambe

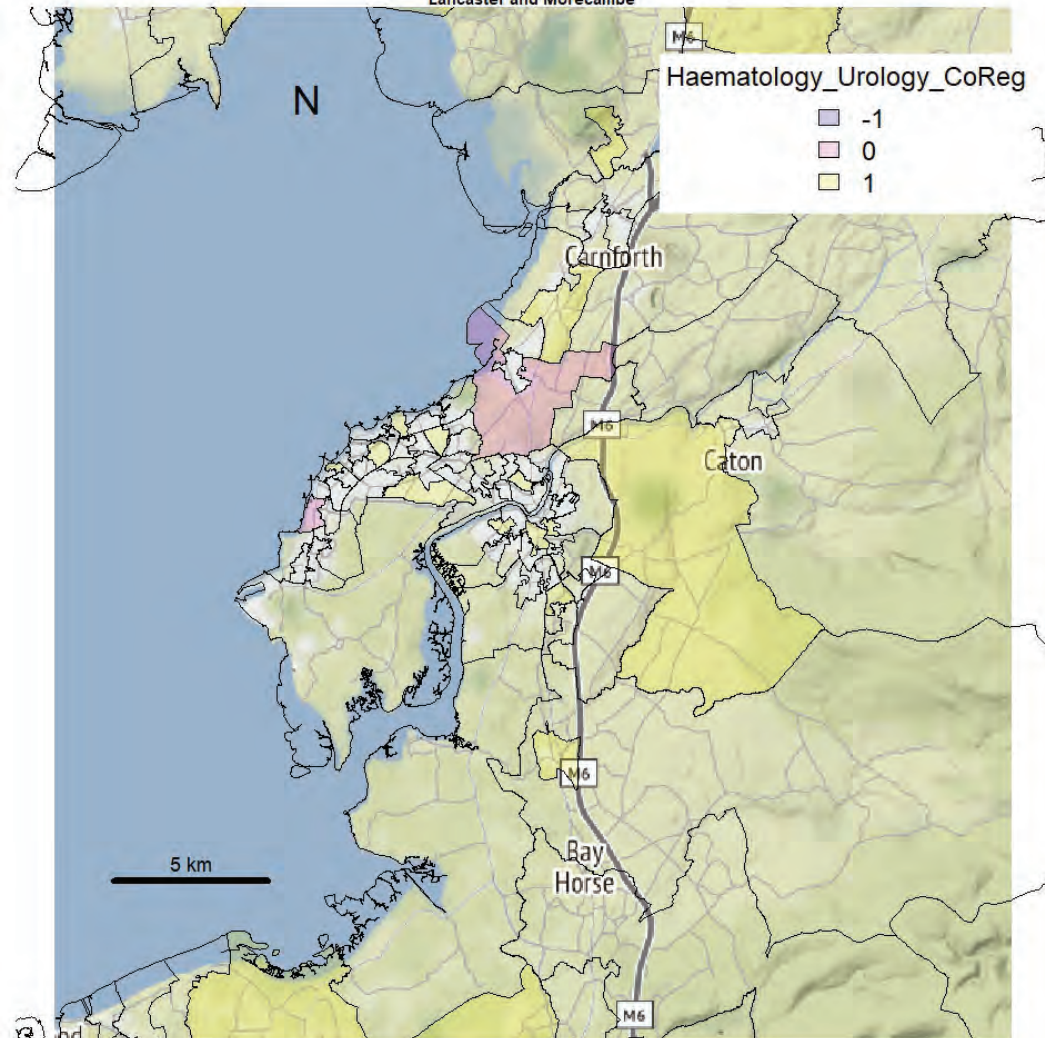

Lancaster and Morecambe

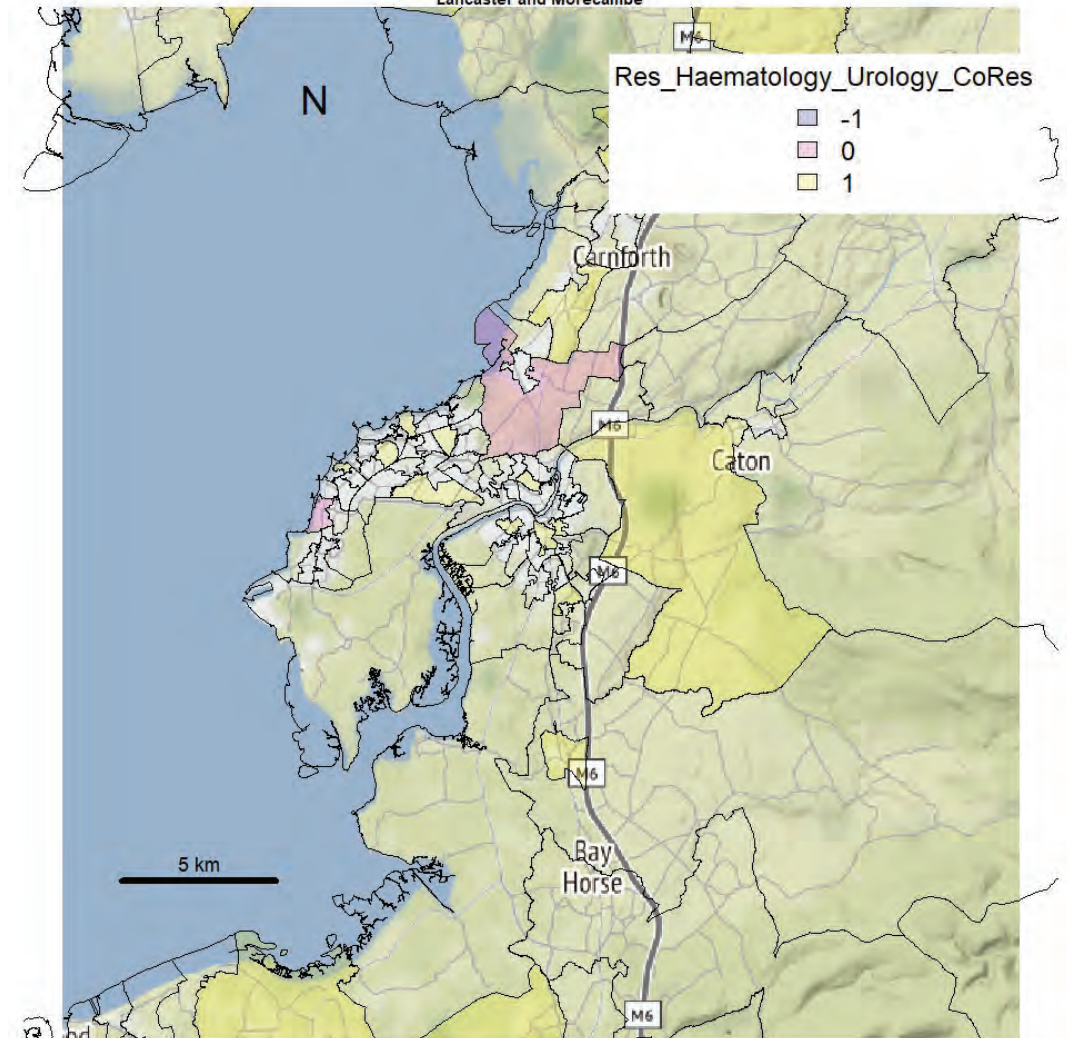

Lancaster and Morecambe

Haematology\_Head and Neck\_CoReg

- 1
- 0
- 1

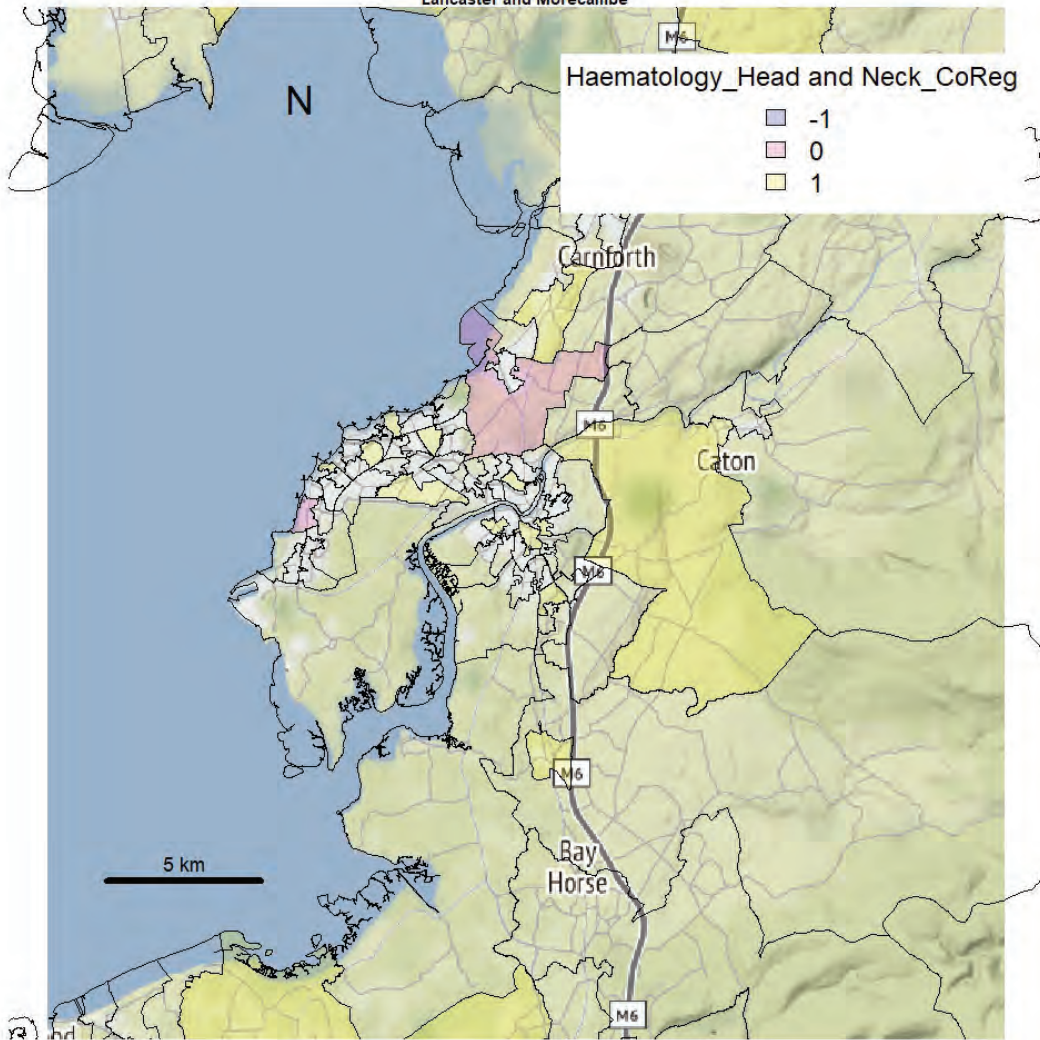

Lancaster and Morecambe

Res\_Haematology\_Head and Neck\_CoRes

- 1
- 0
- 1

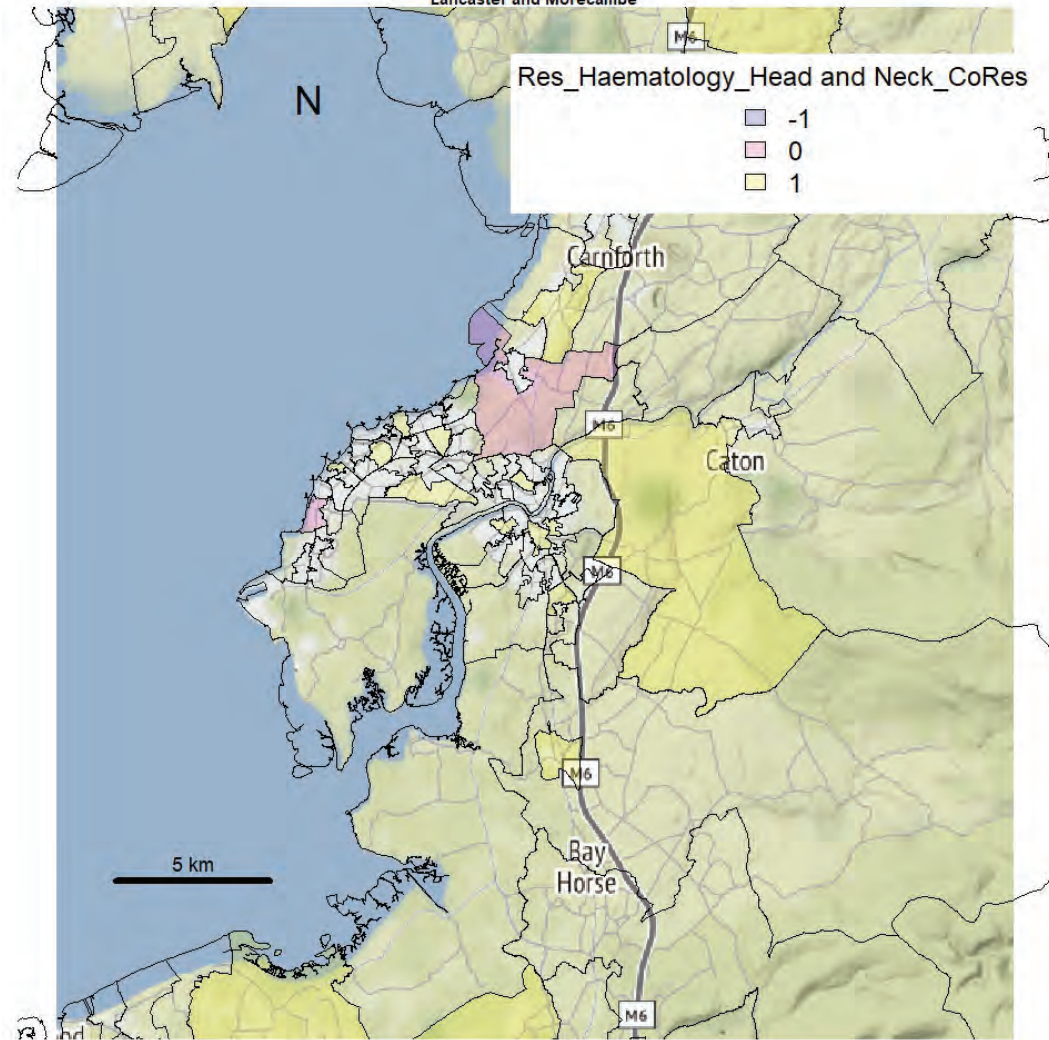

Lancaster and Morecambe

Haematology\_Gynaecology\_CoReg

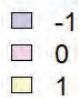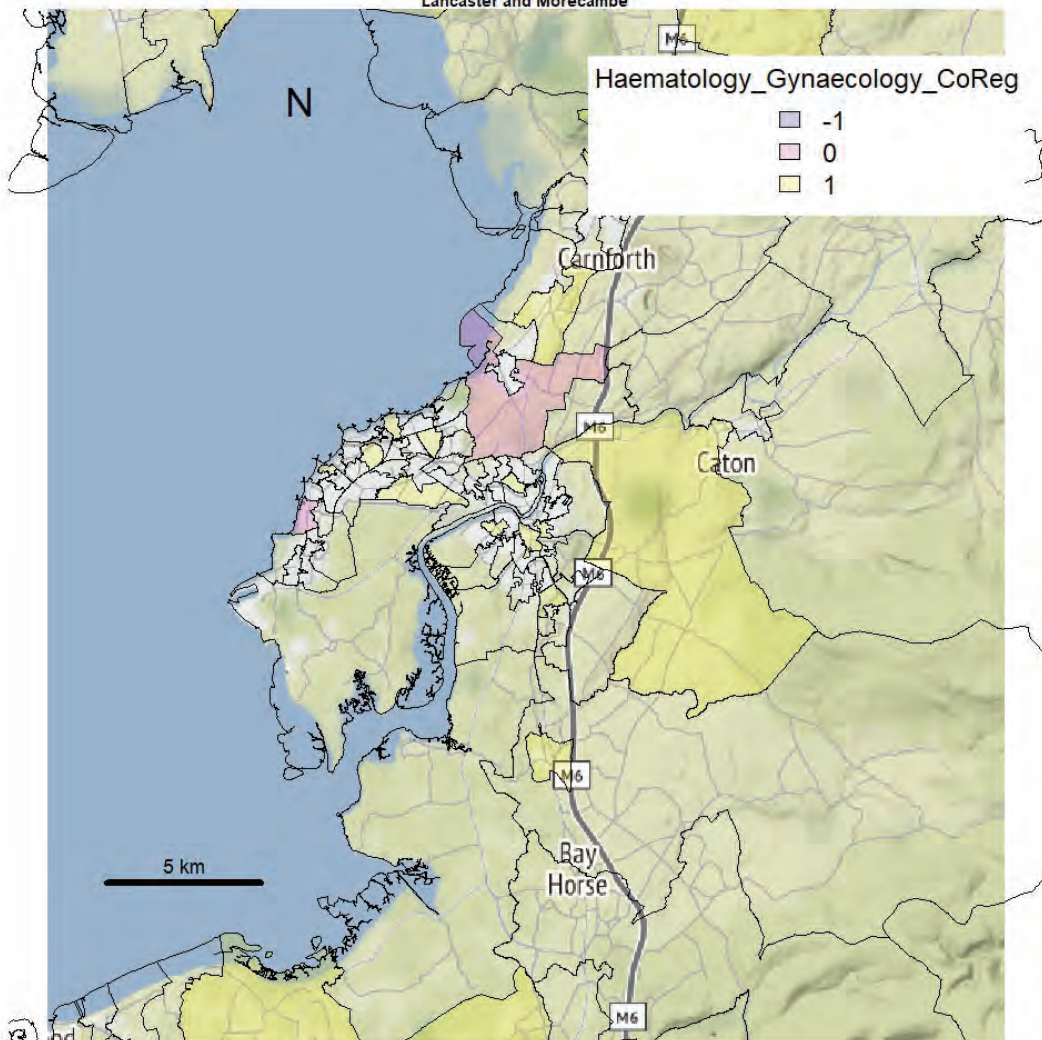

Lancaster and Morecambe

Res\_Haematology\_Gynaecology\_CoRes

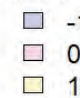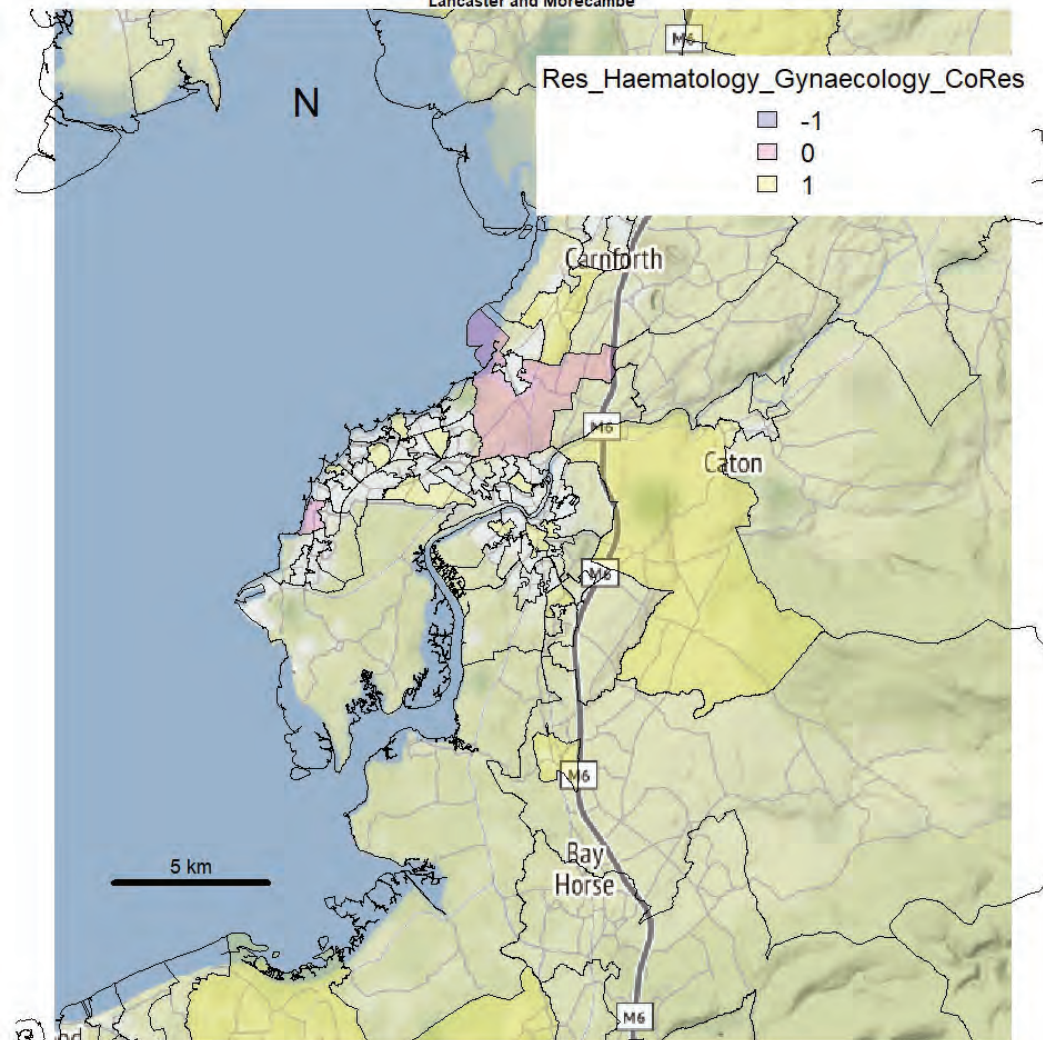

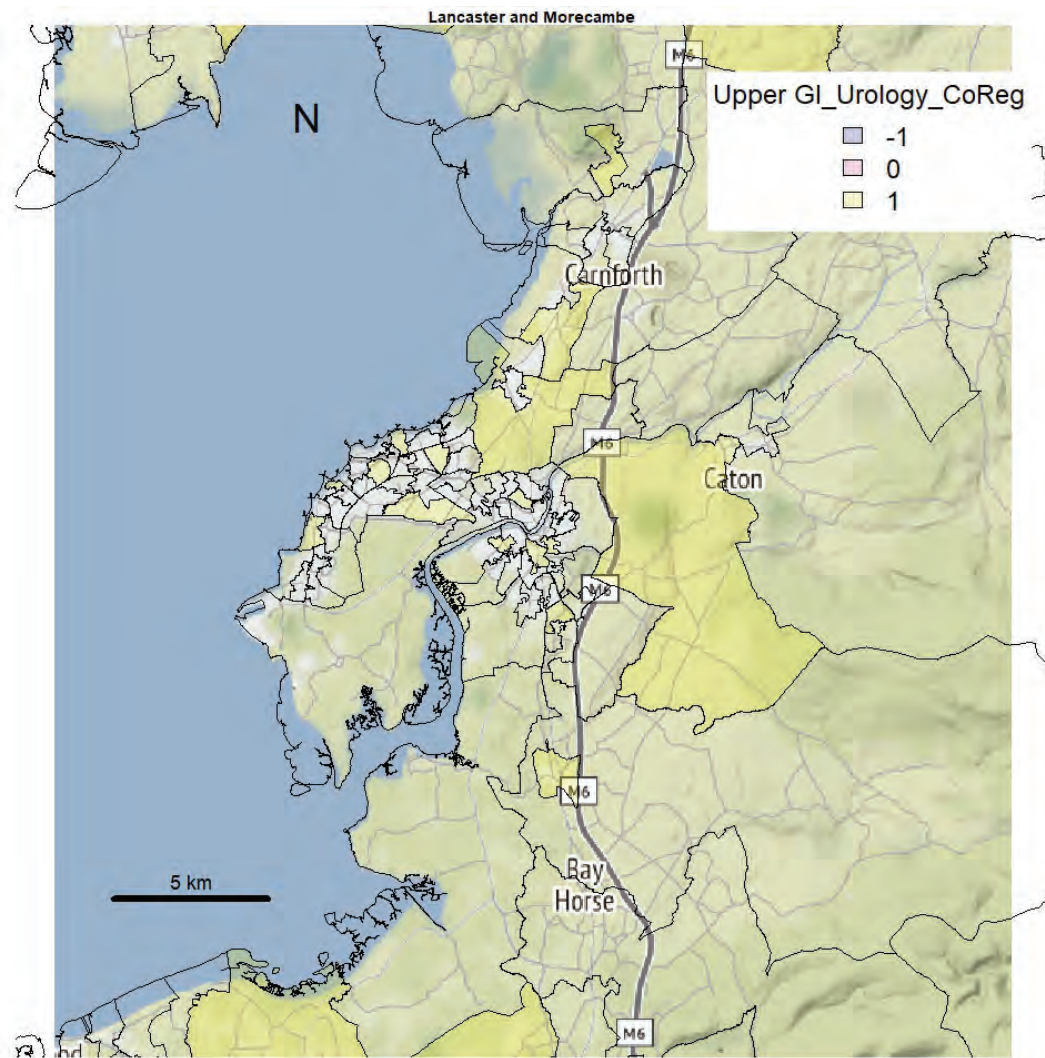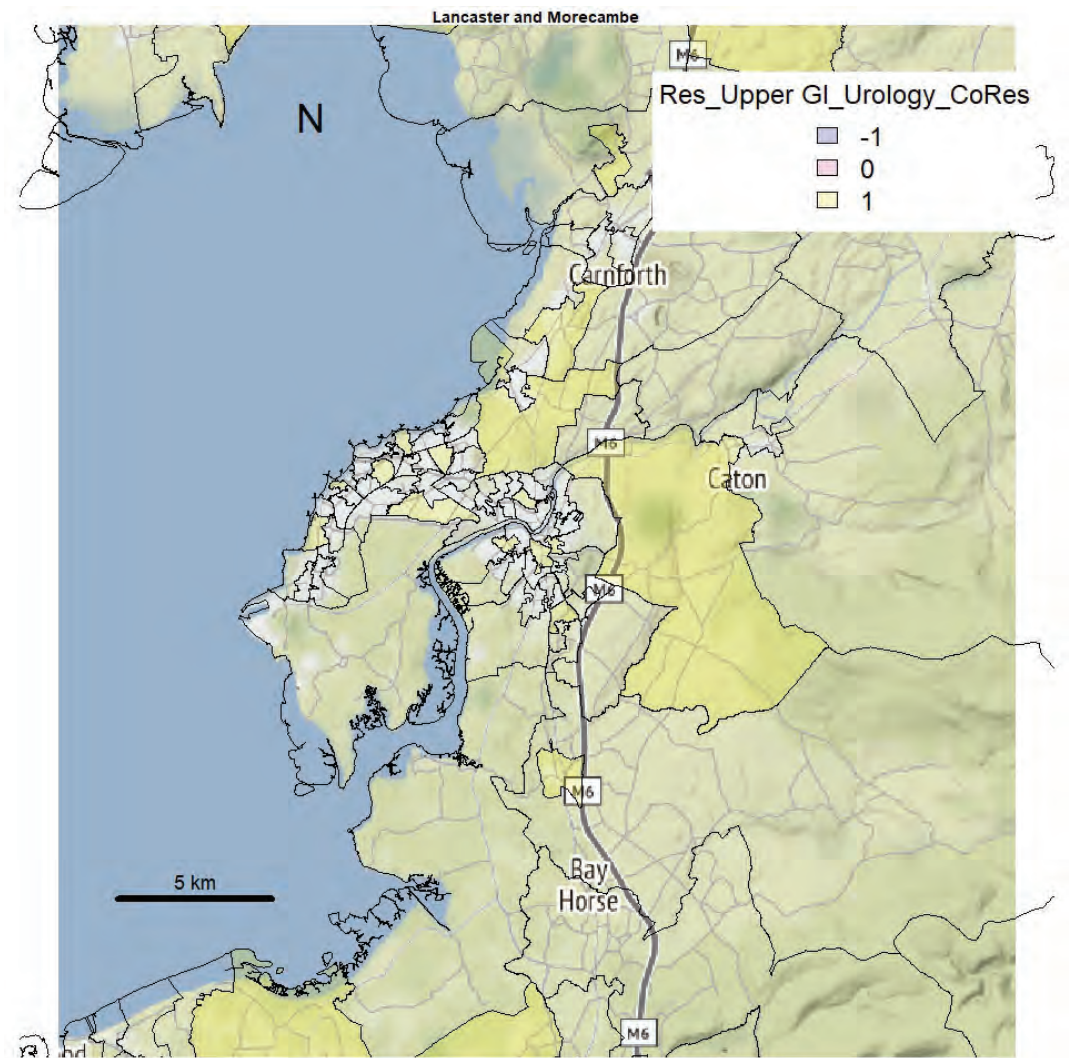

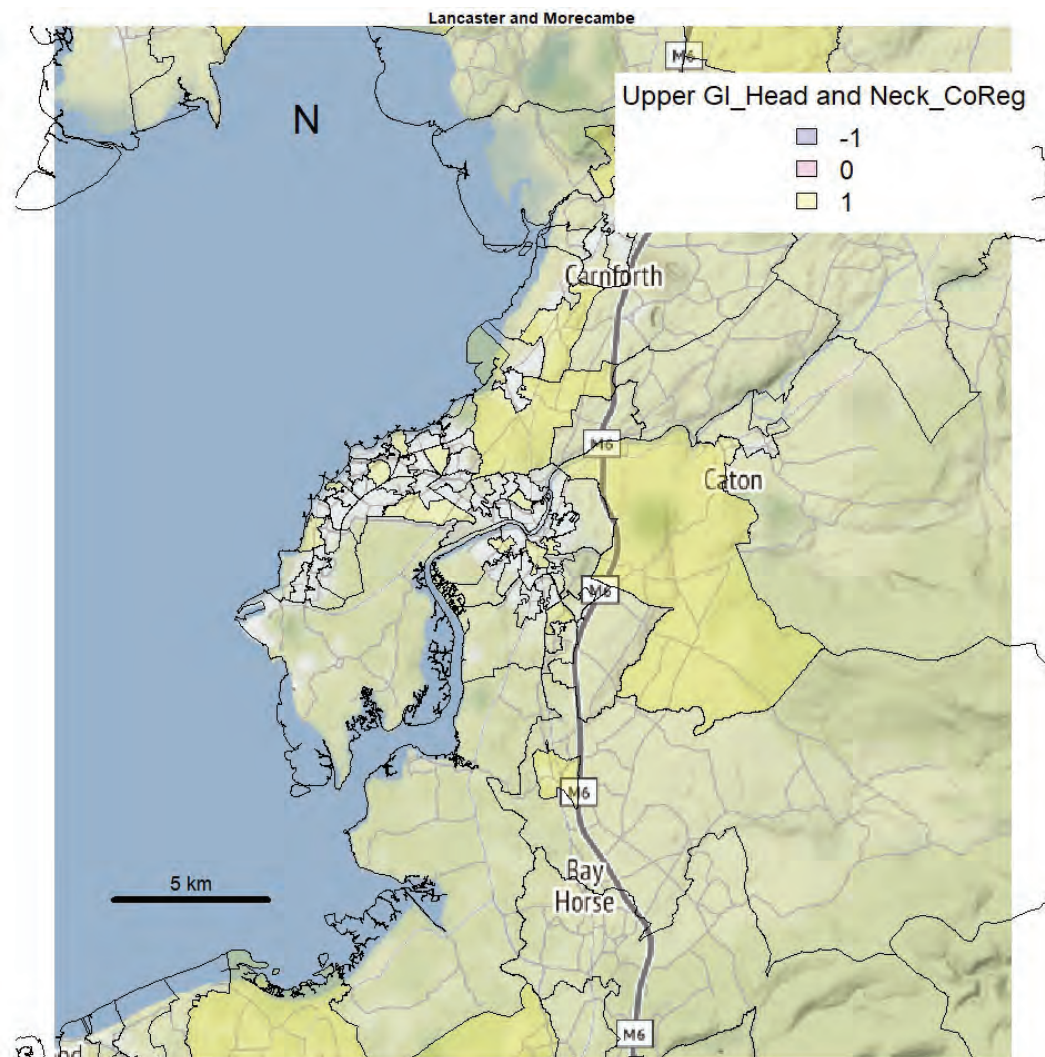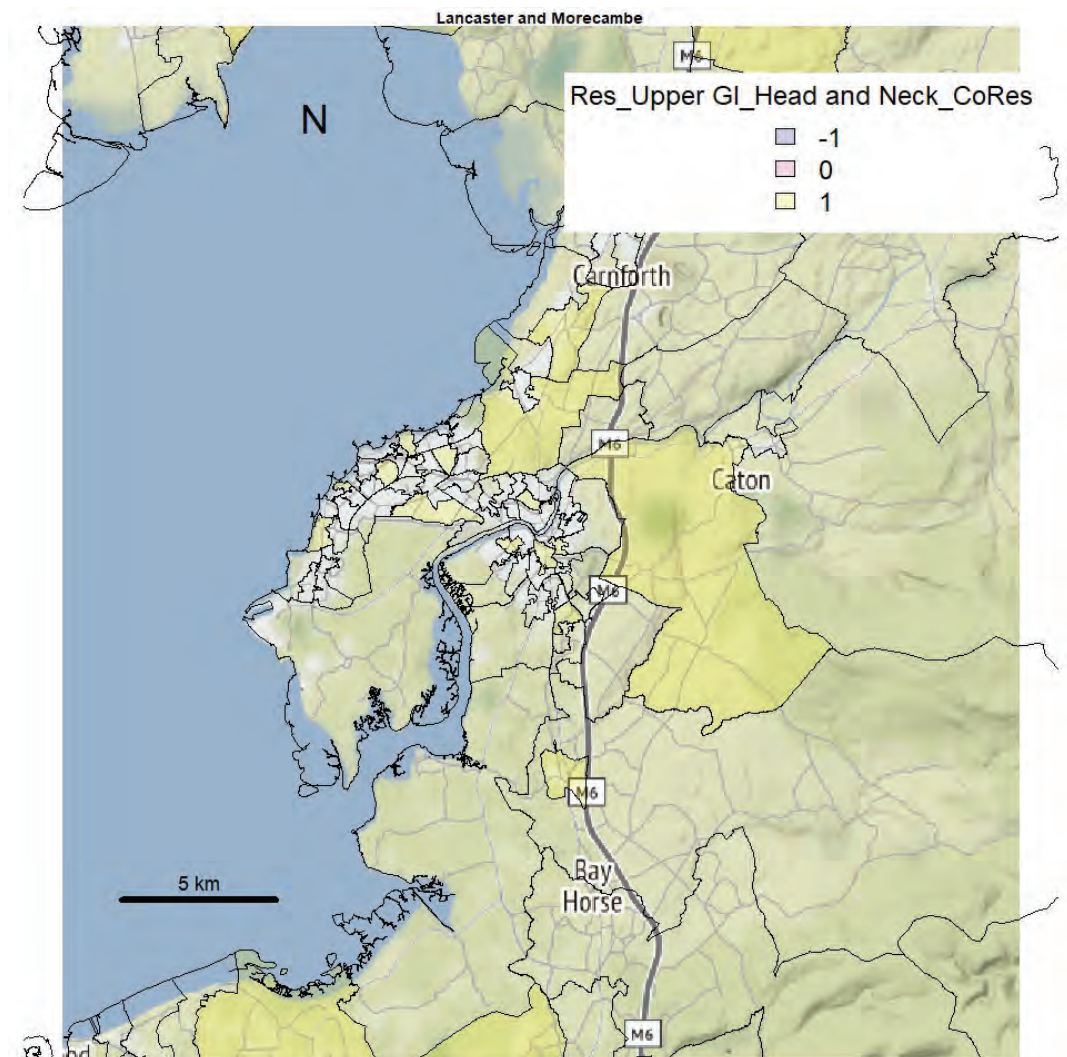

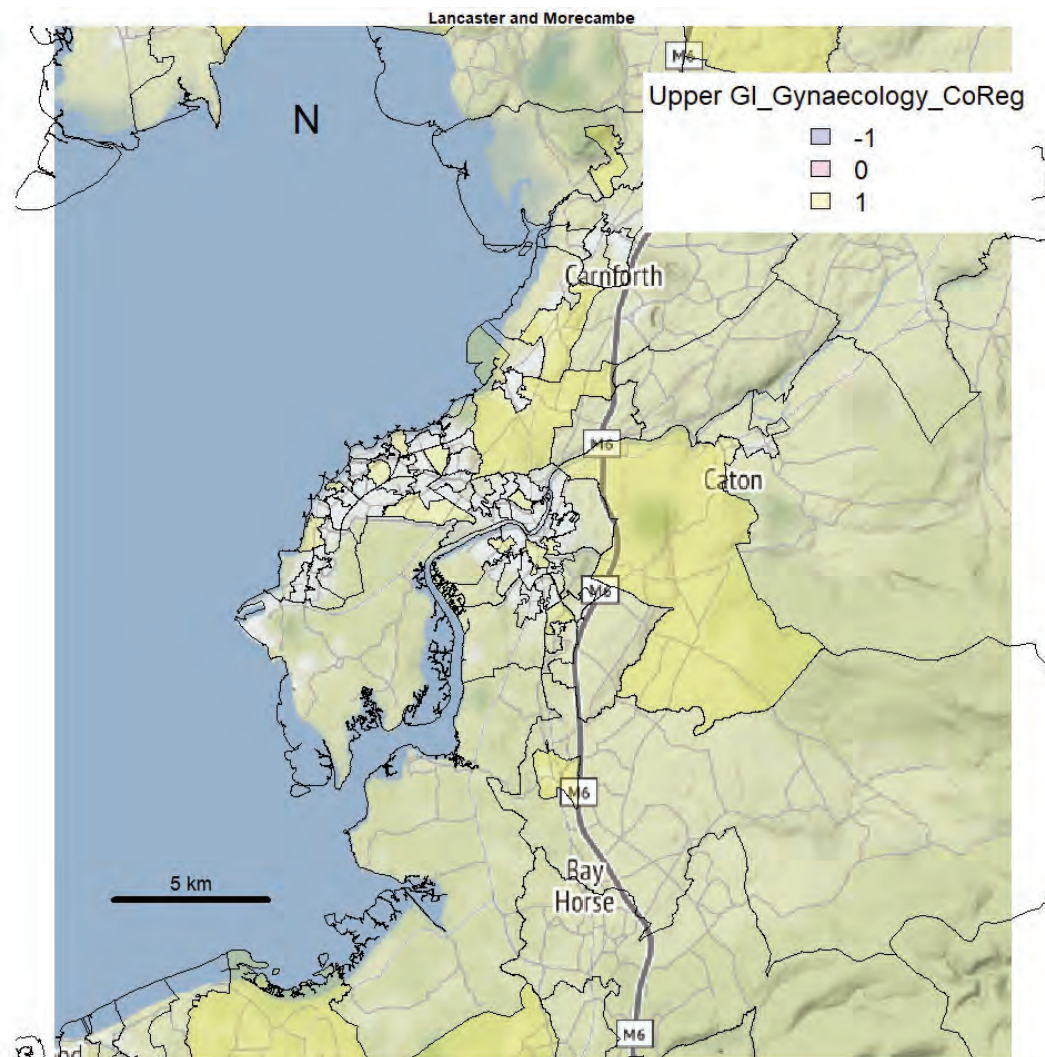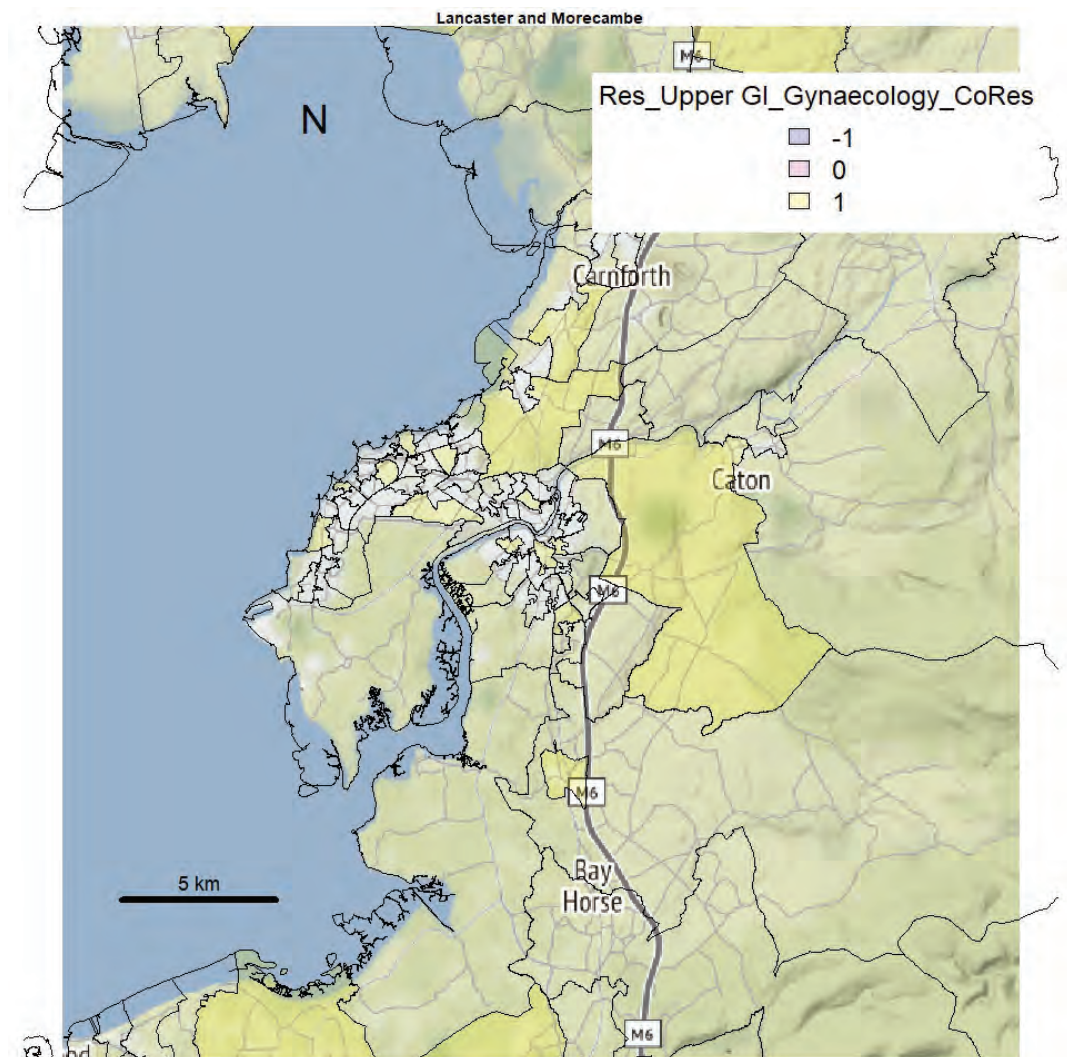

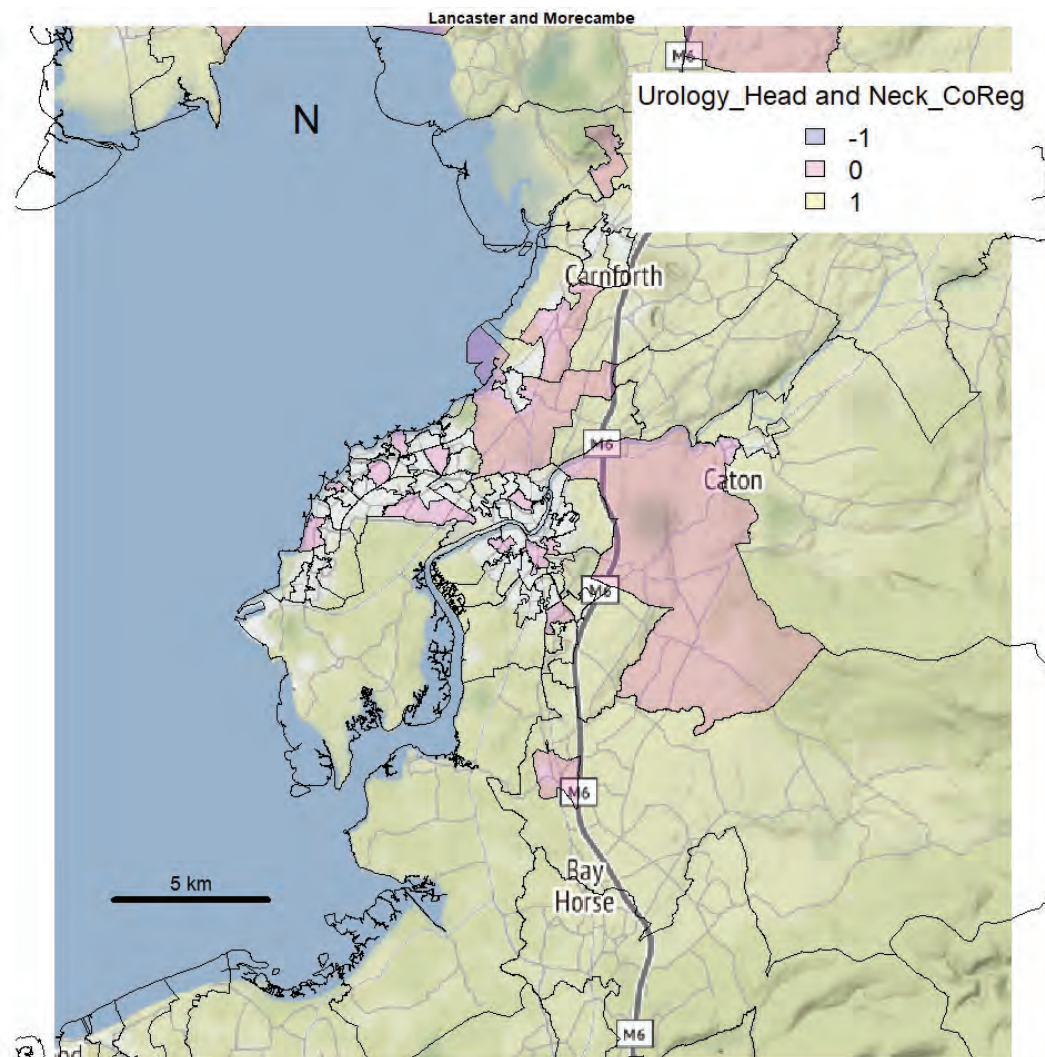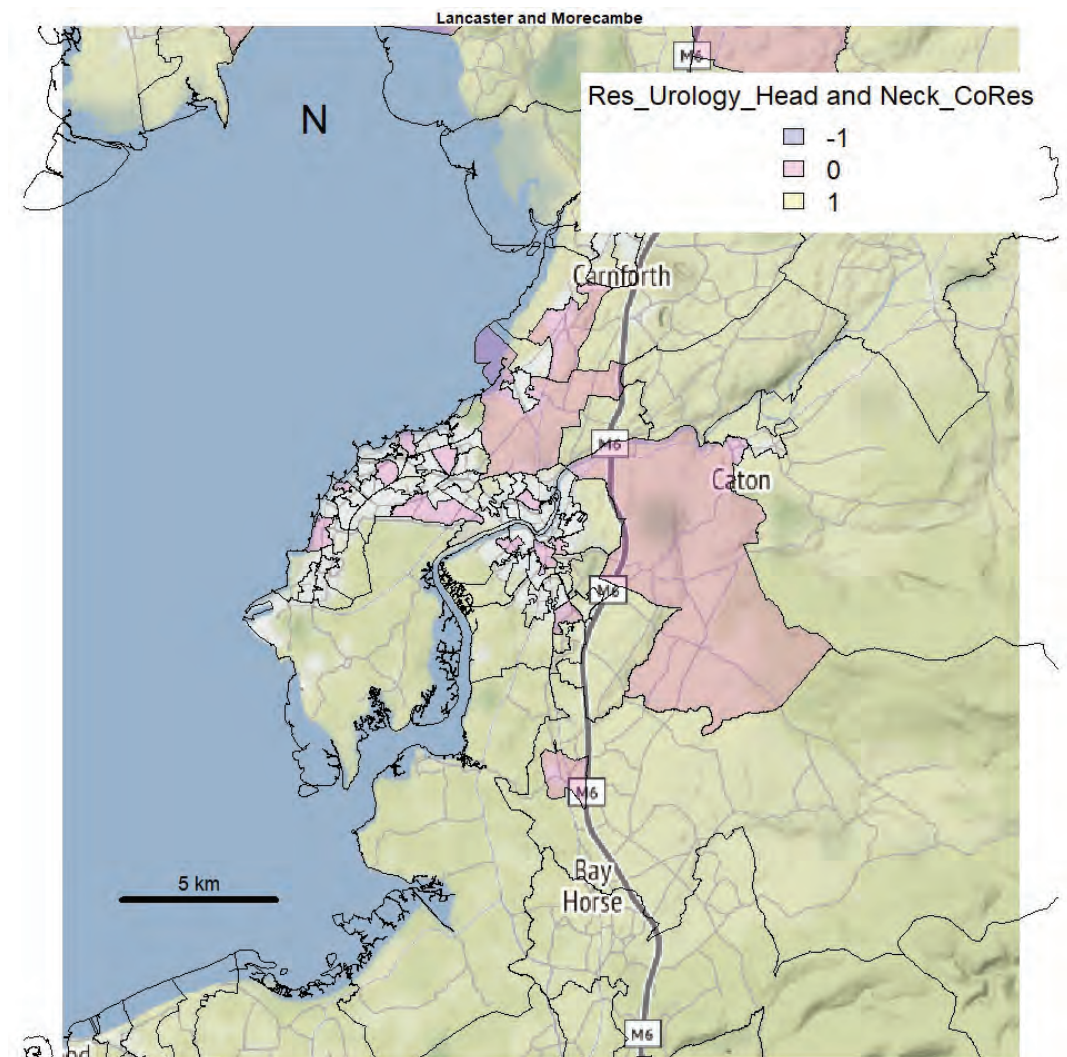



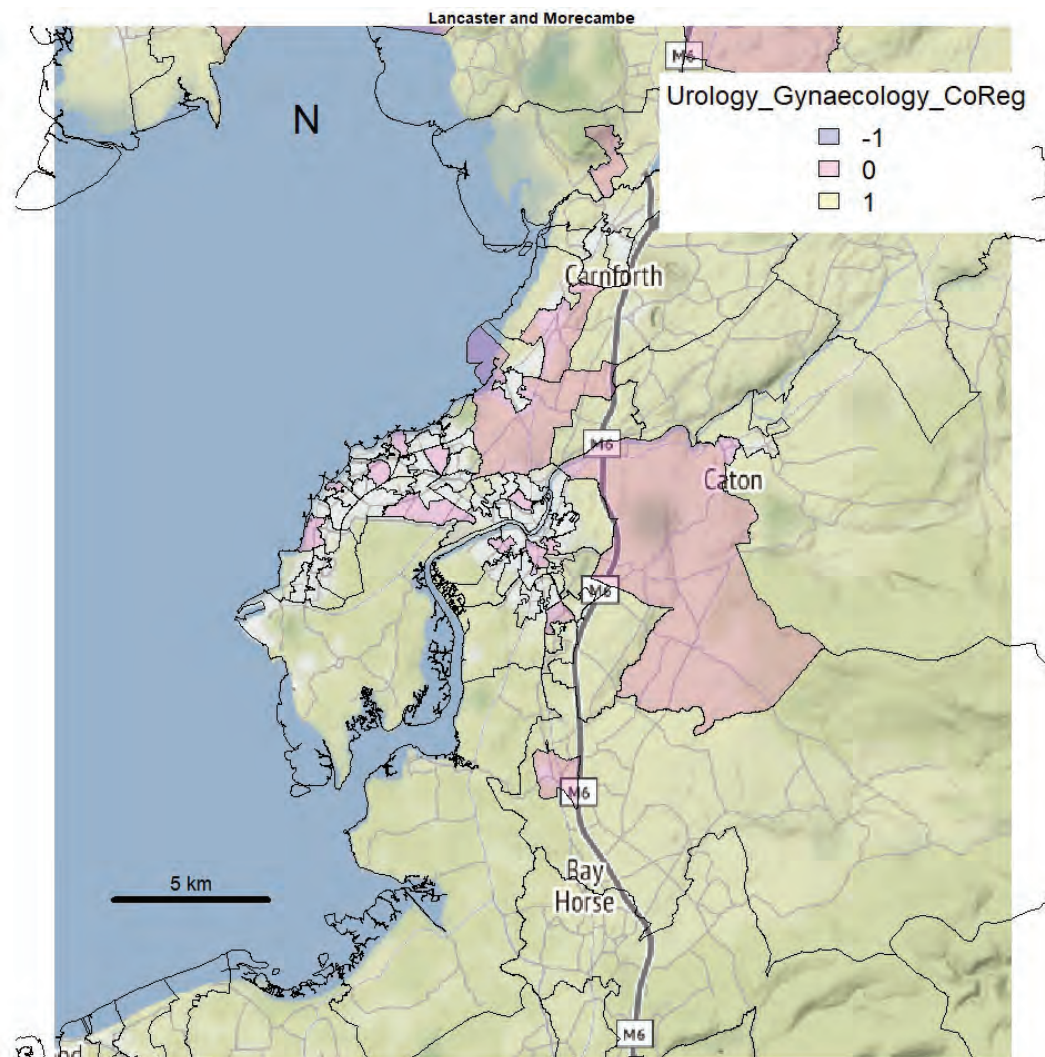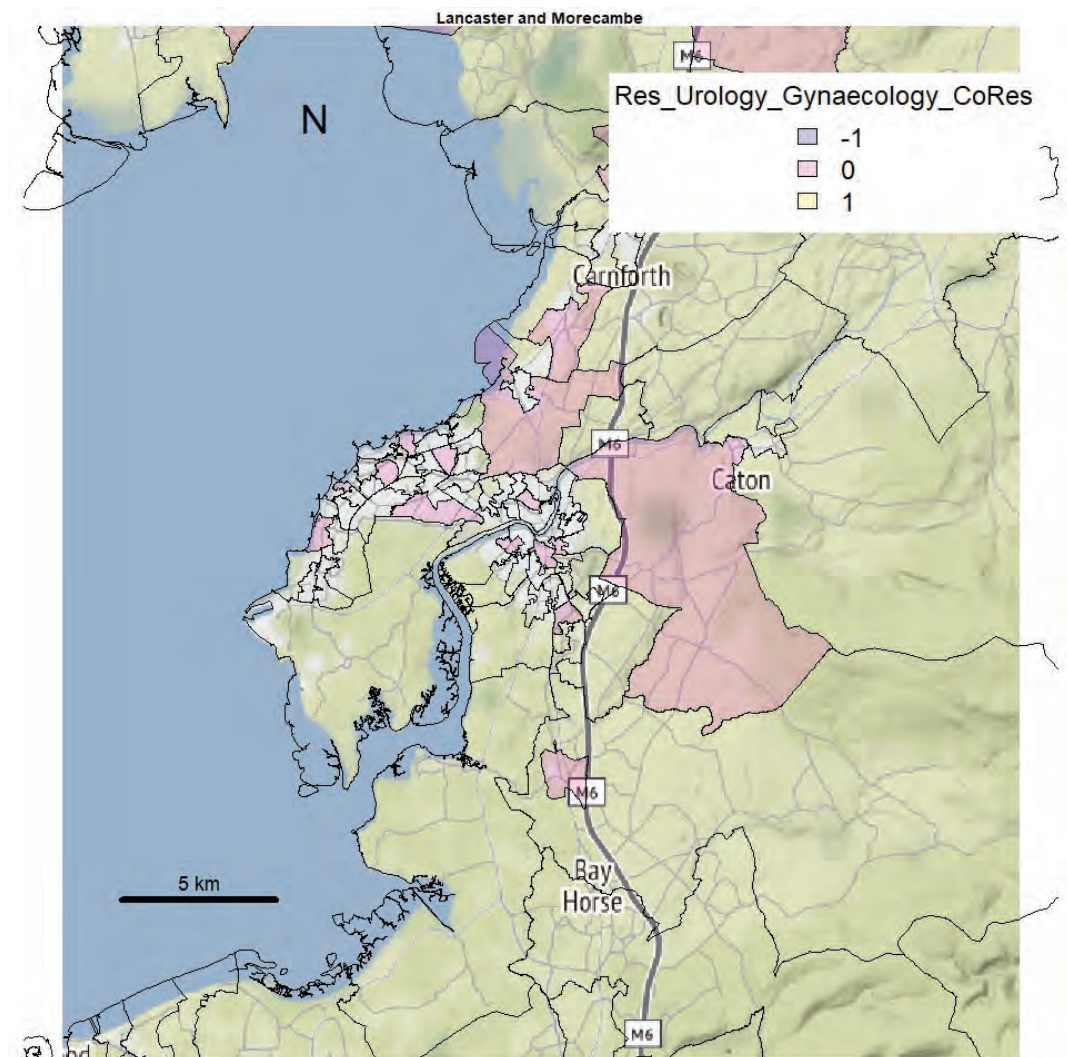

Lancaster and Morecambe

Head and Neck\_Gynaecology\_CoReg

- 1
- 0
- 1

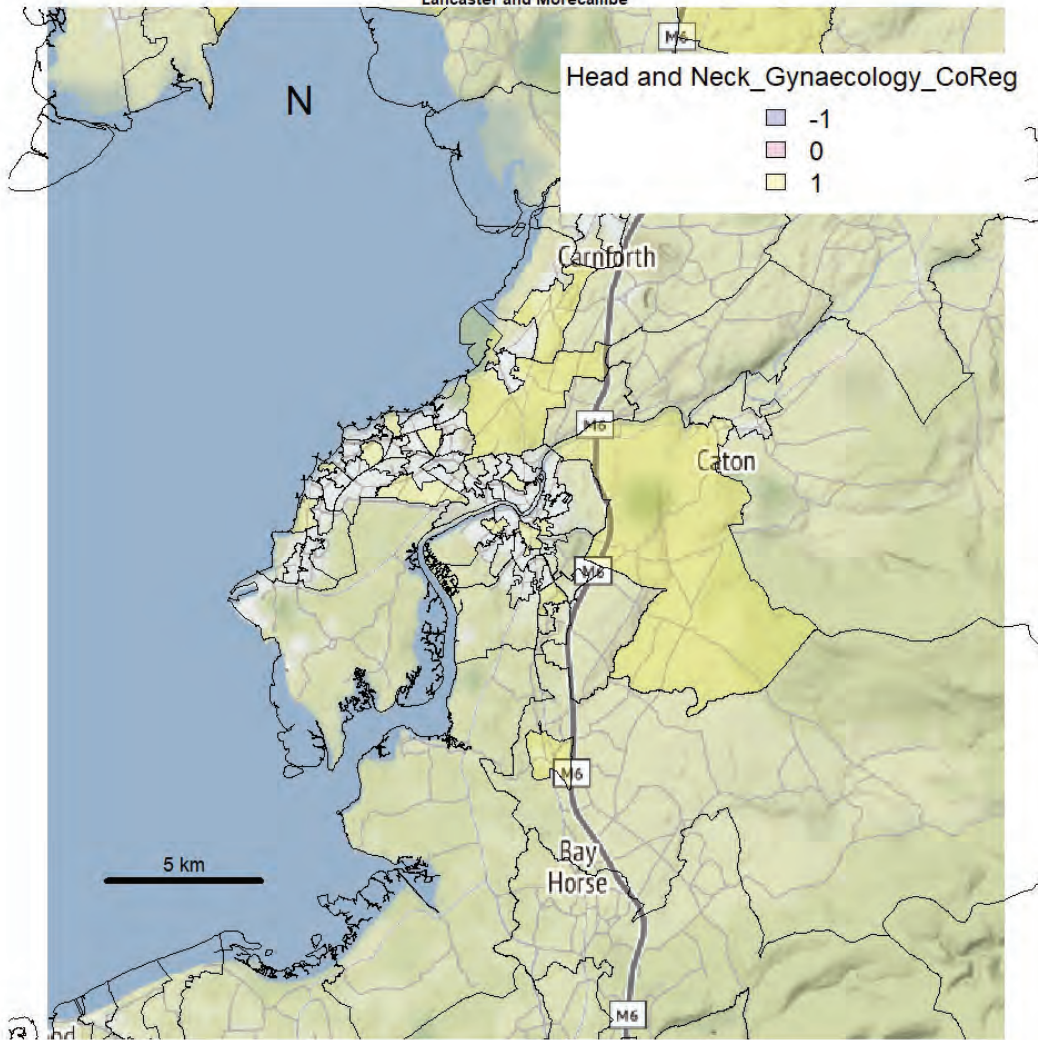

Lancaster and Morecambe

Res\_Head and Neck\_Gynaecology\_CoRes

- 1
- 0
- 1

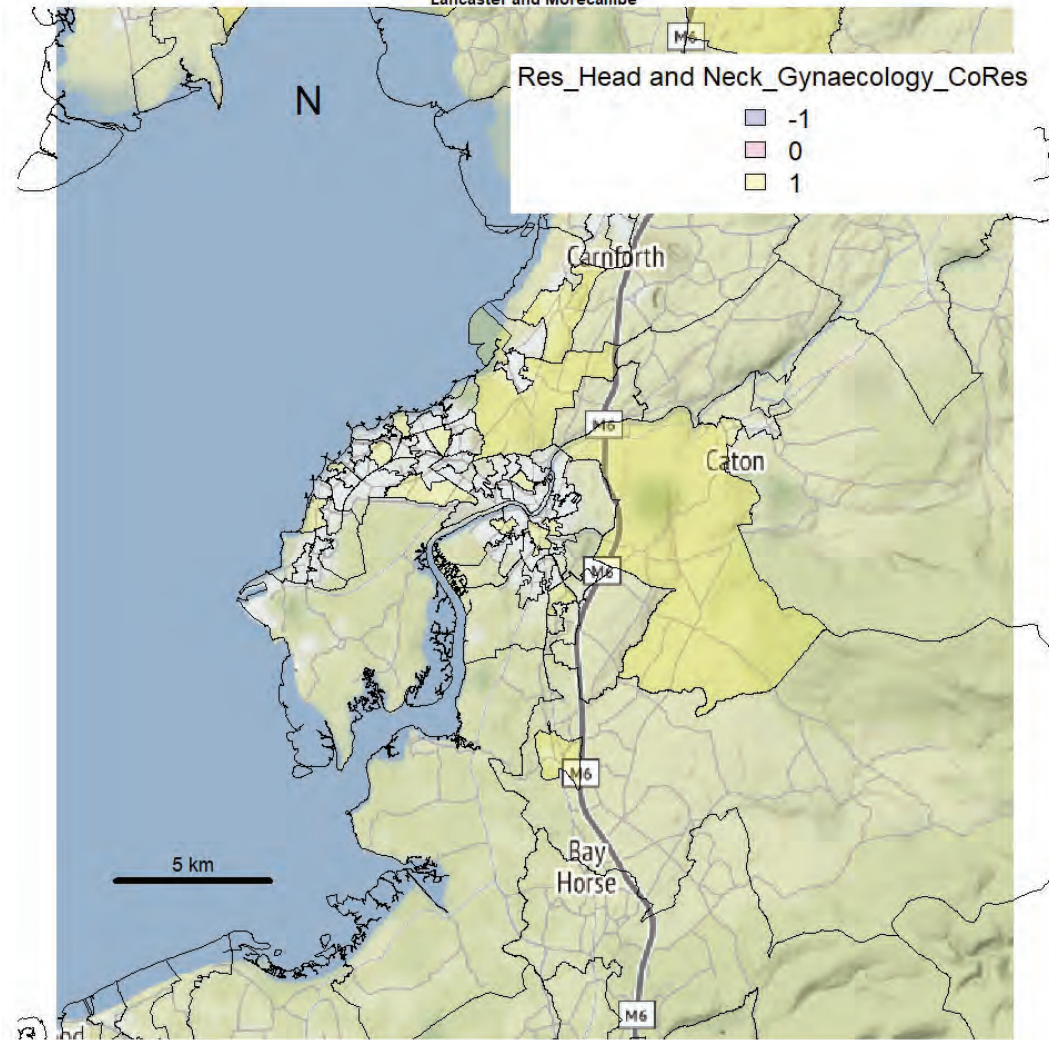

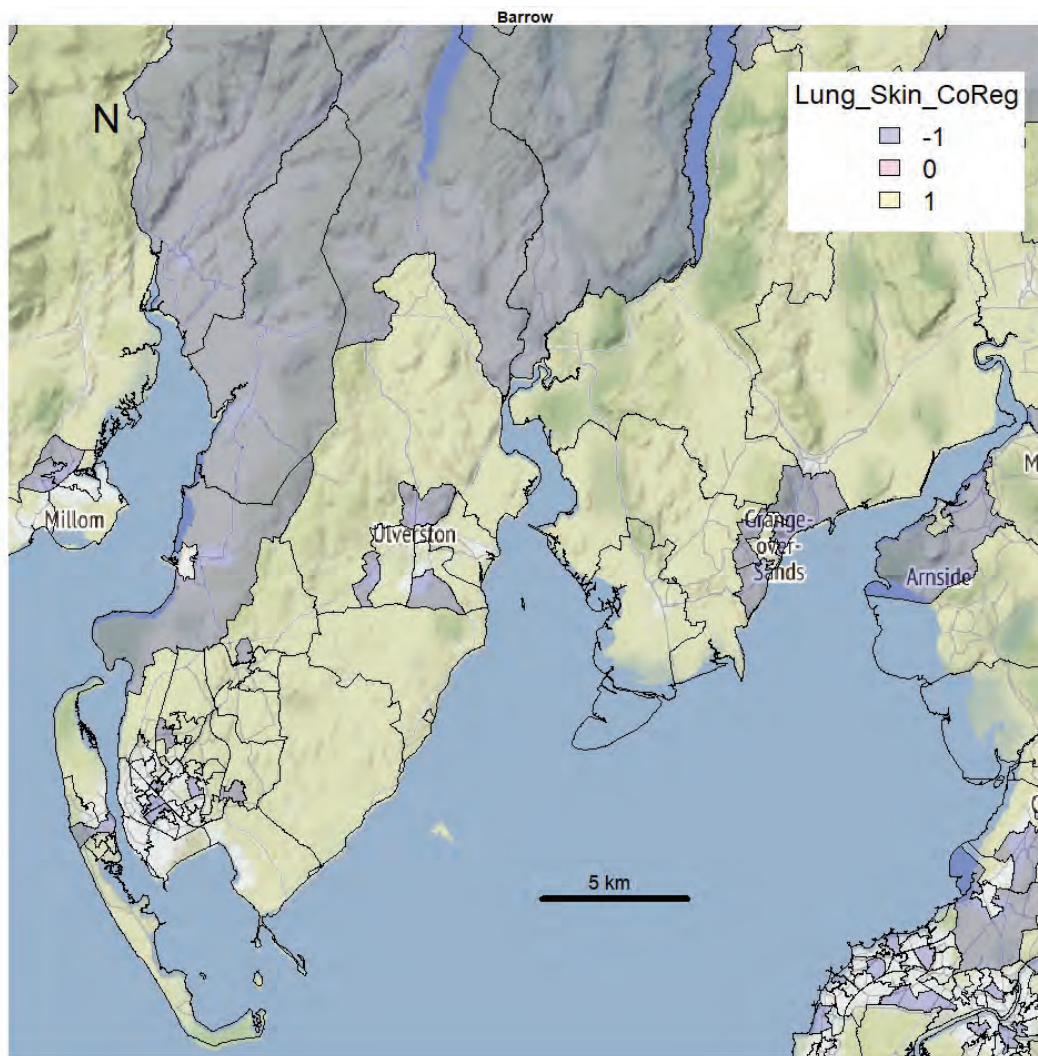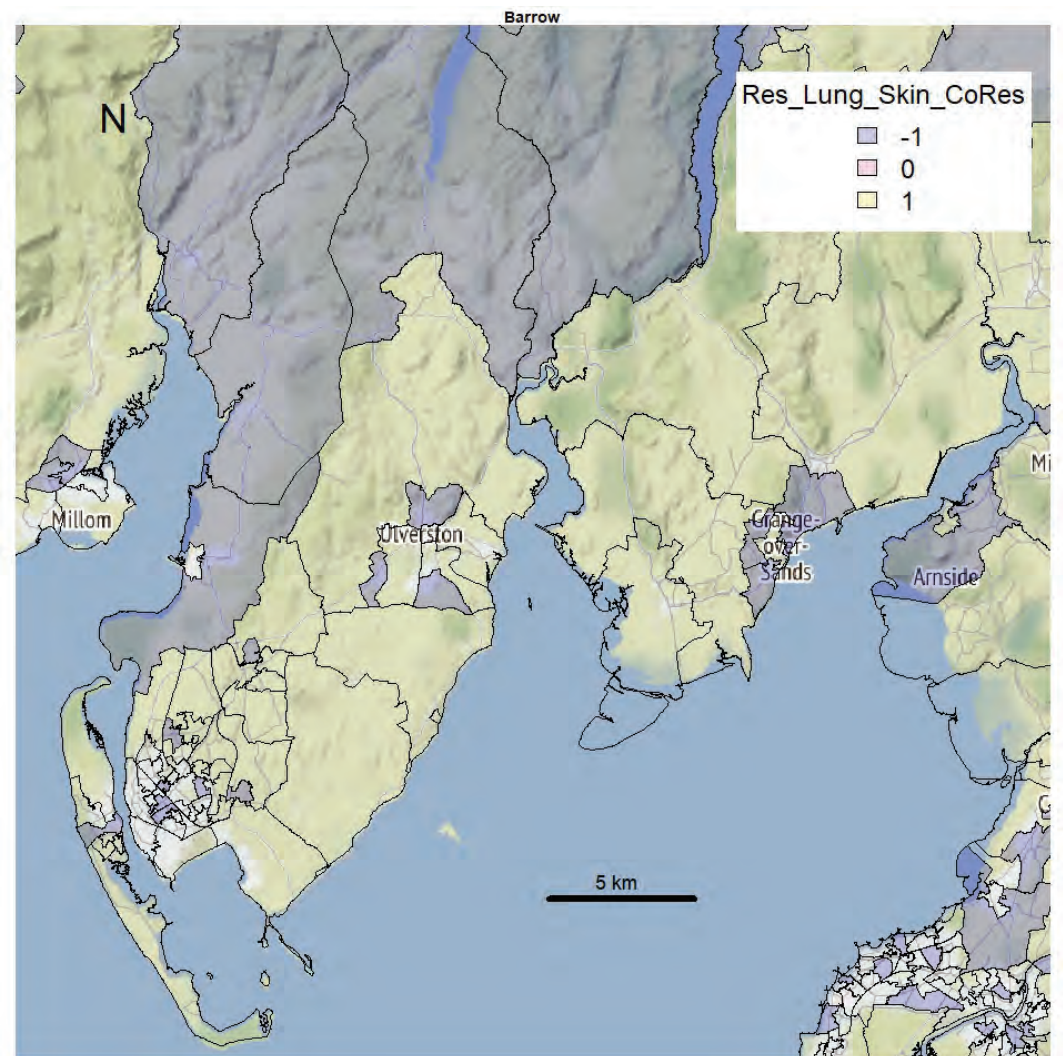

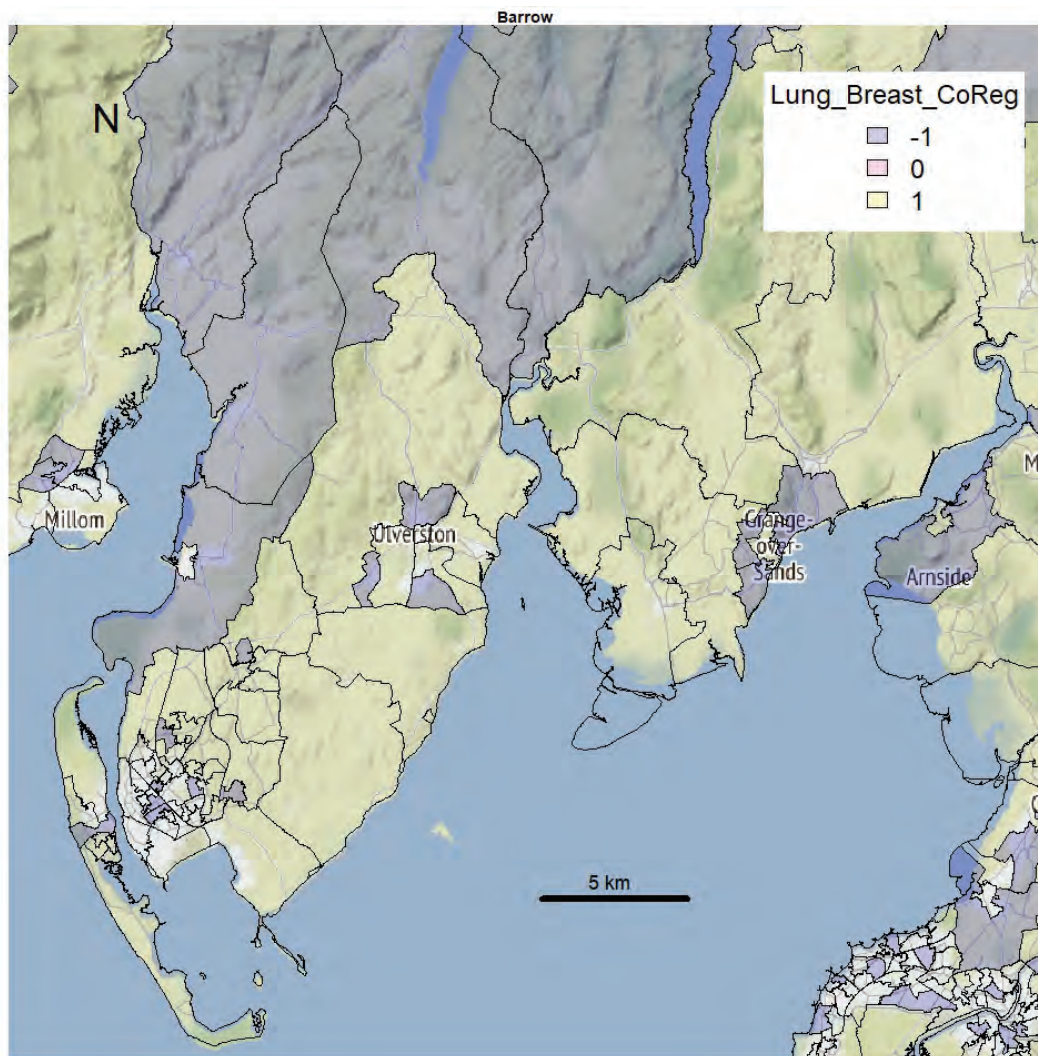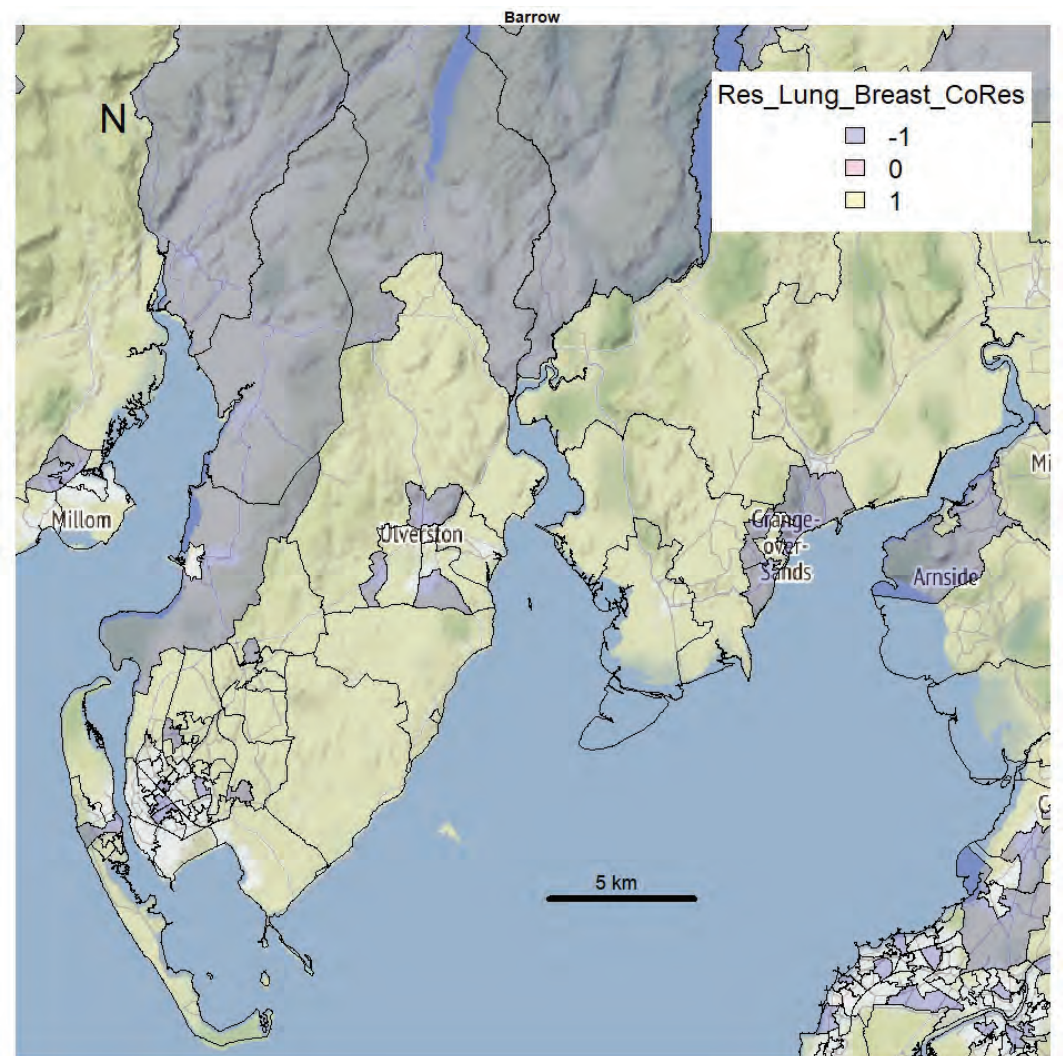

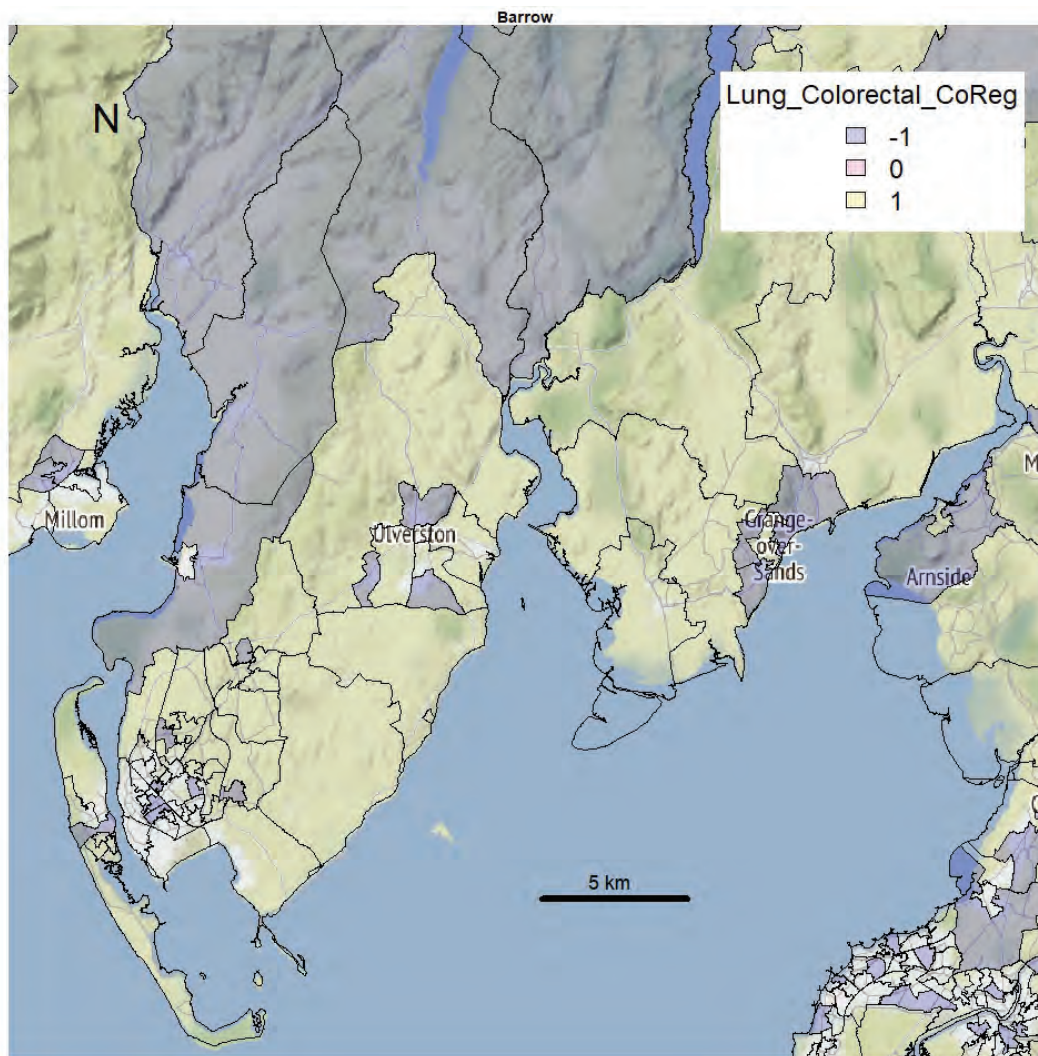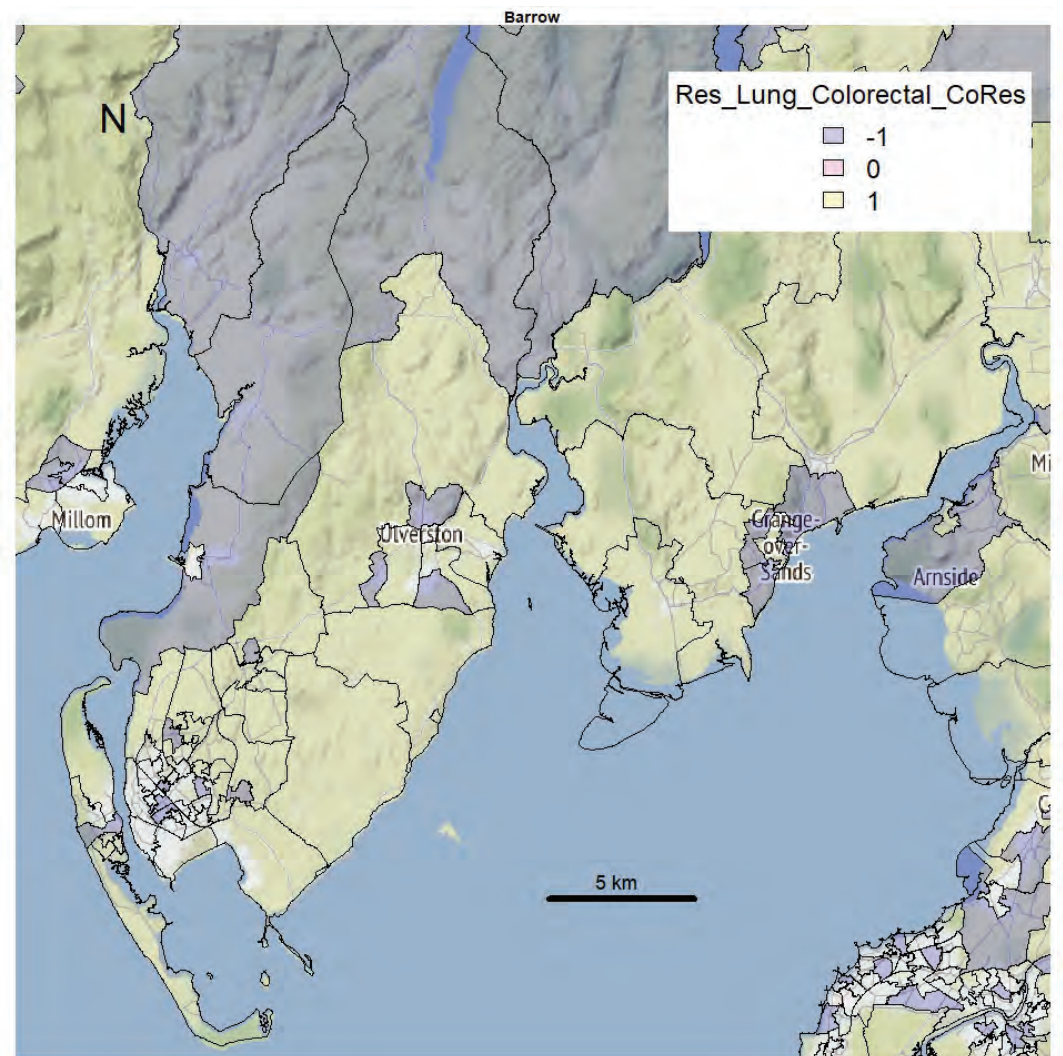

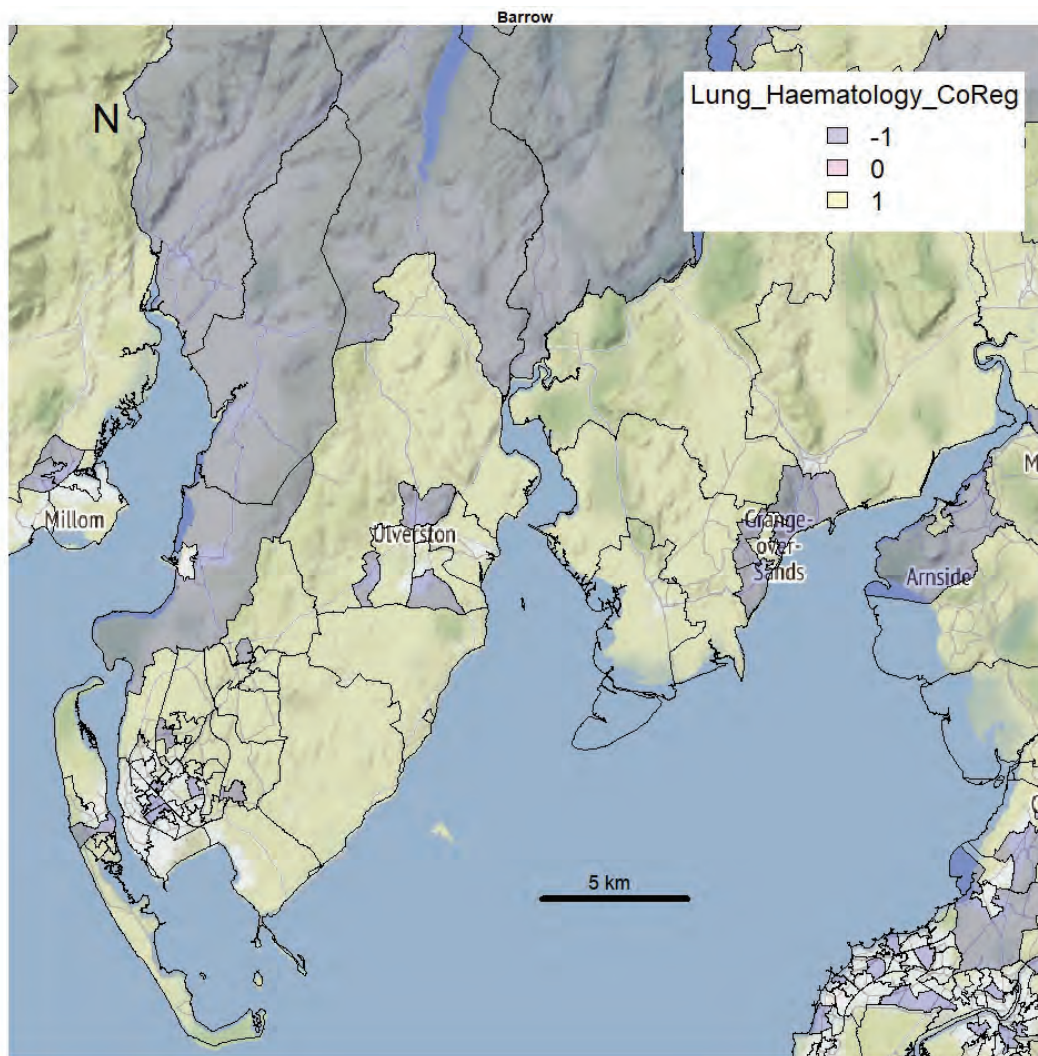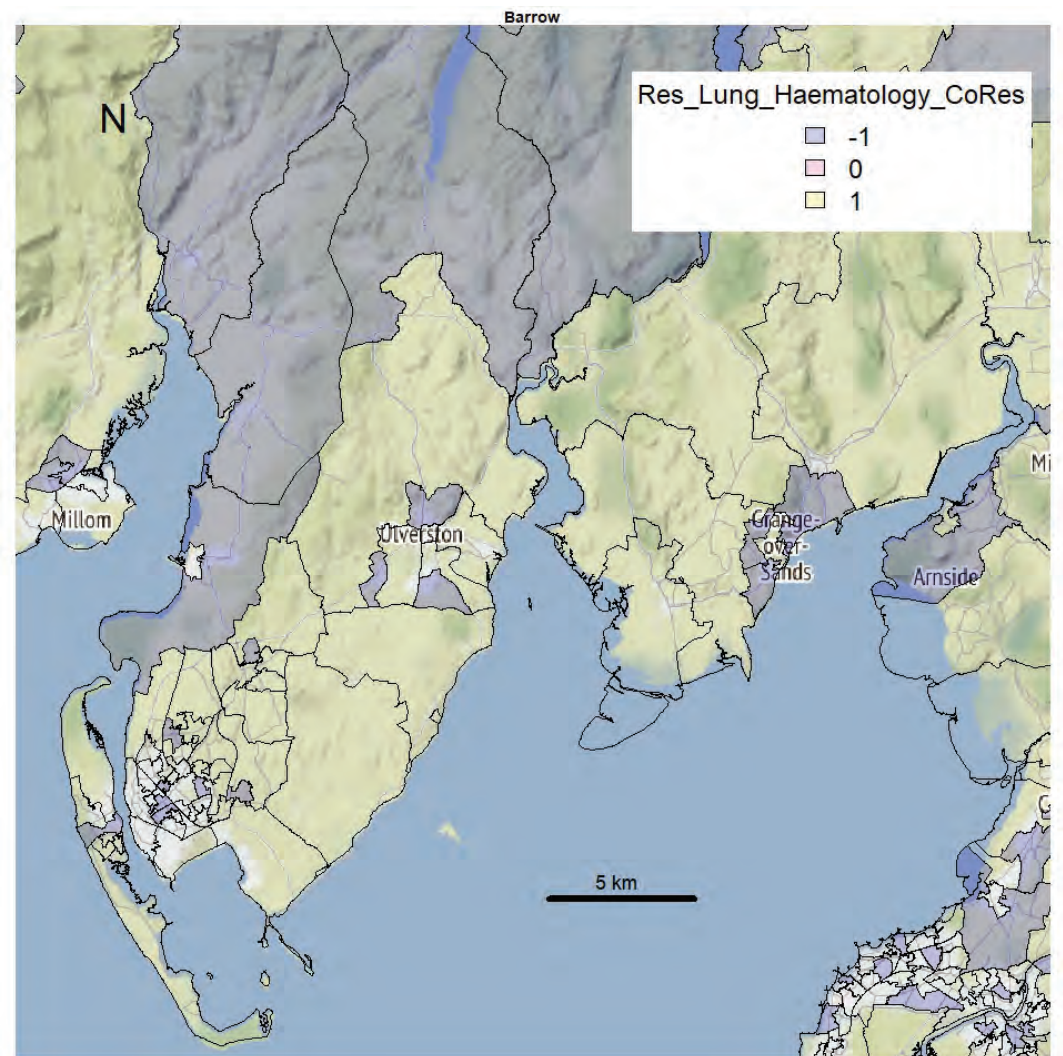

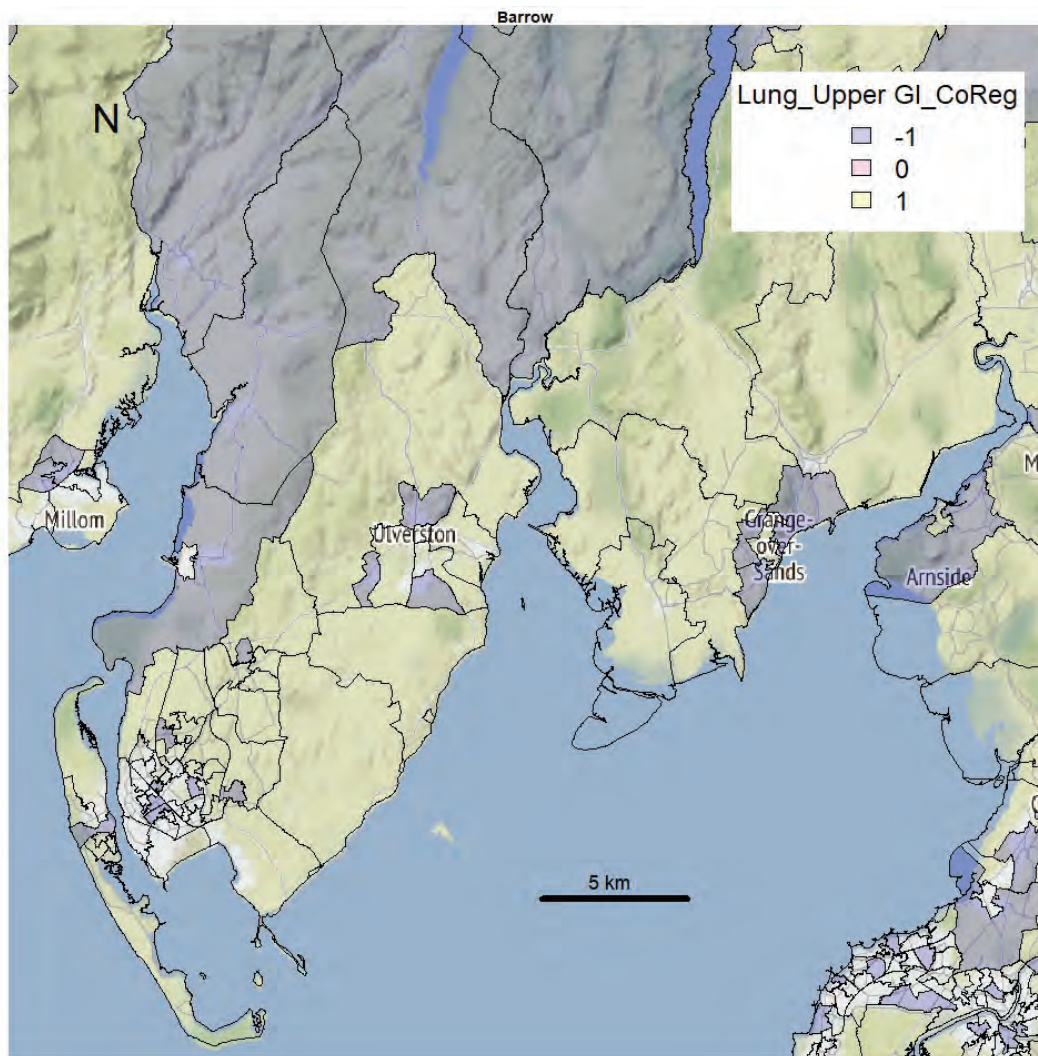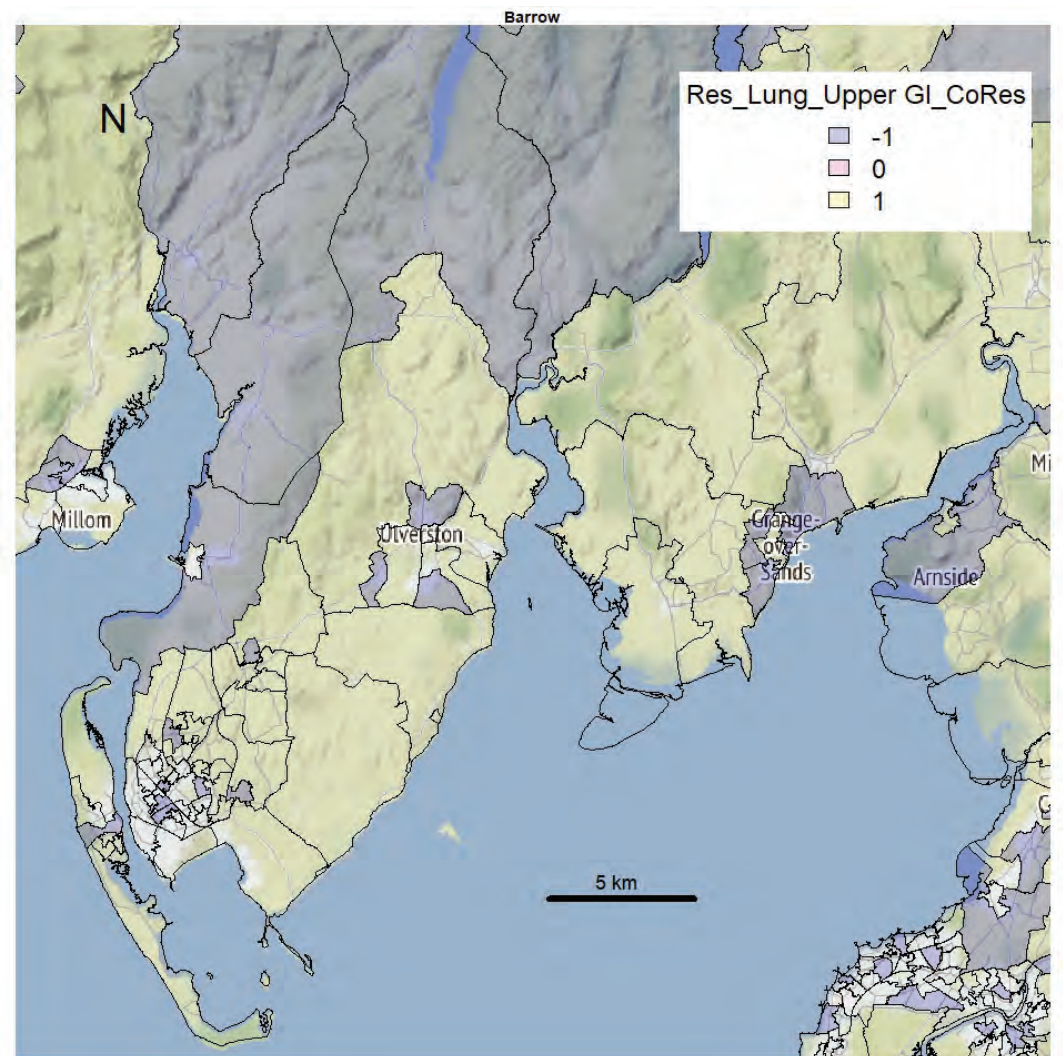

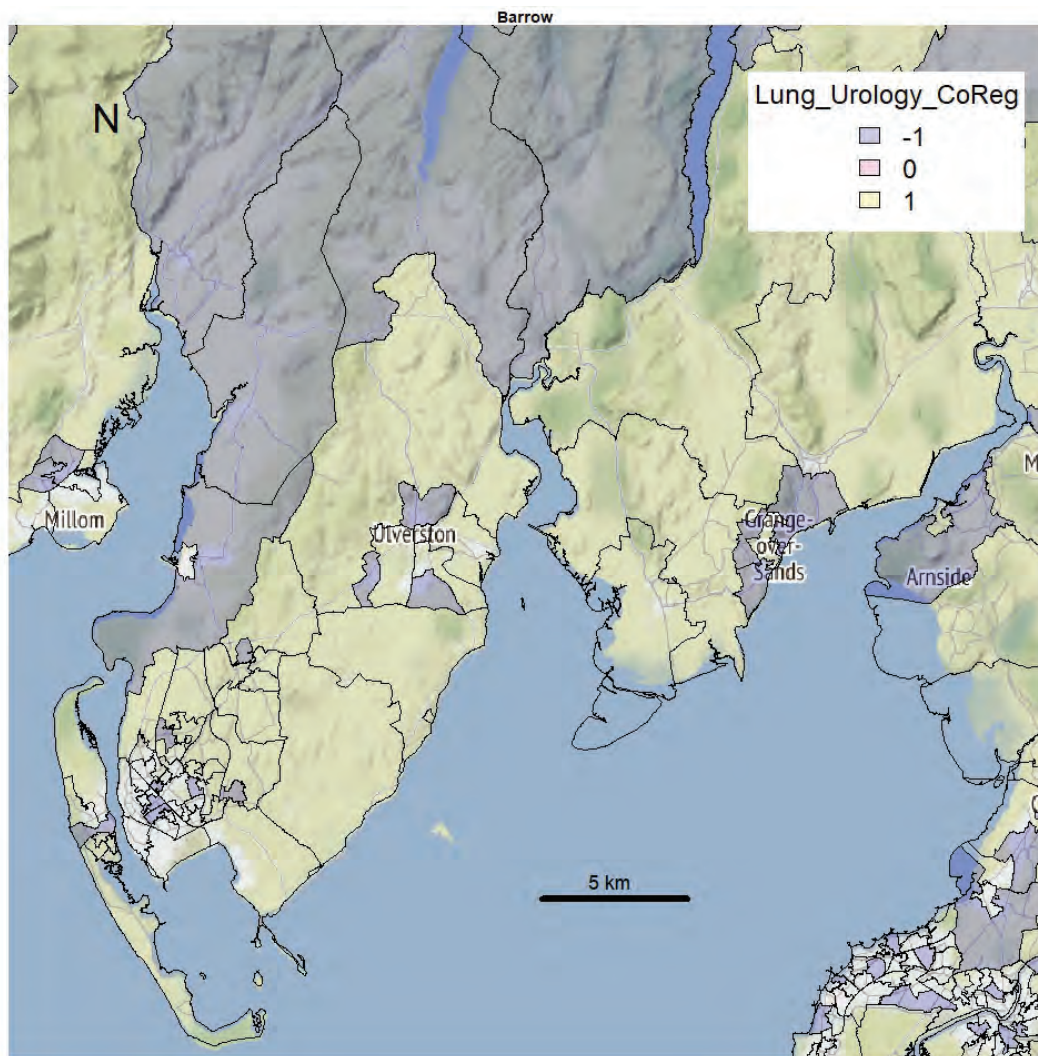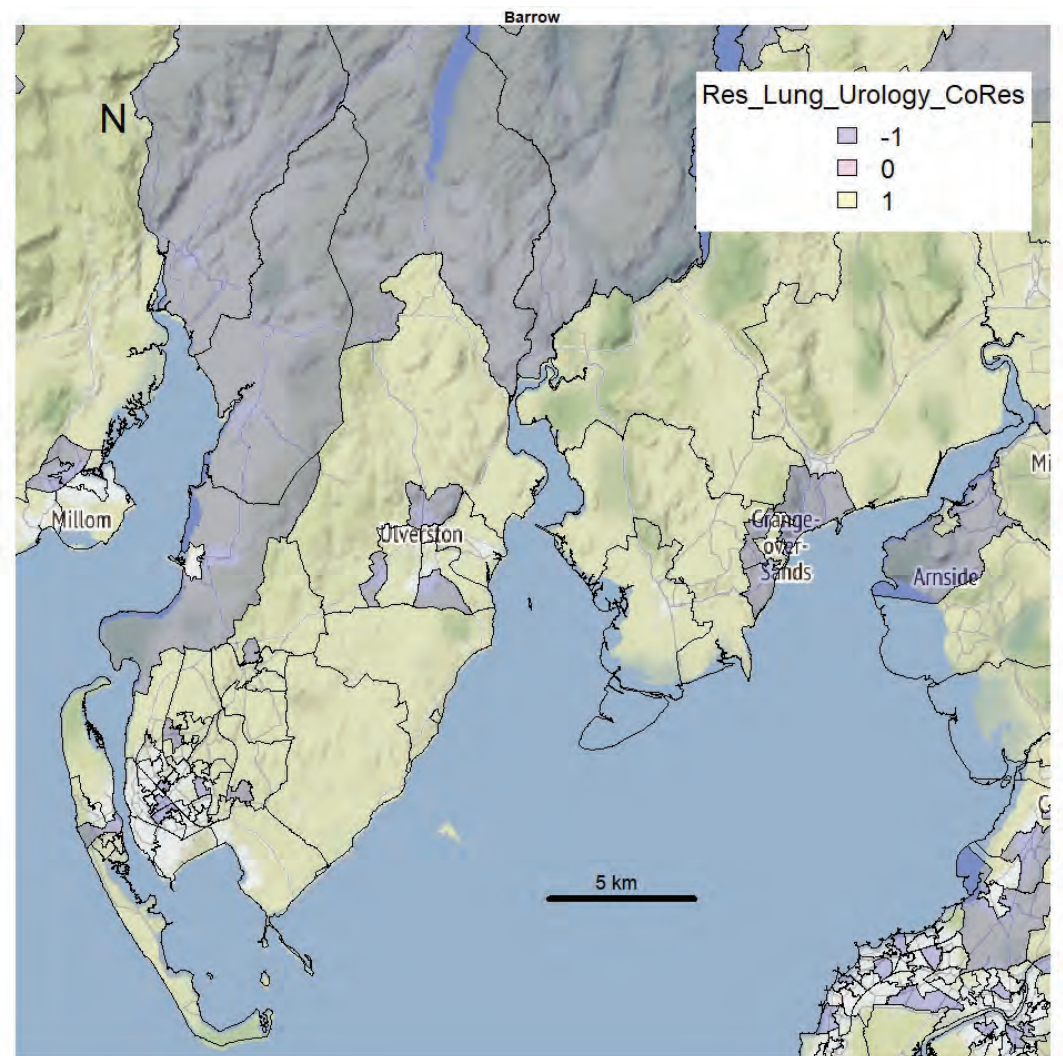



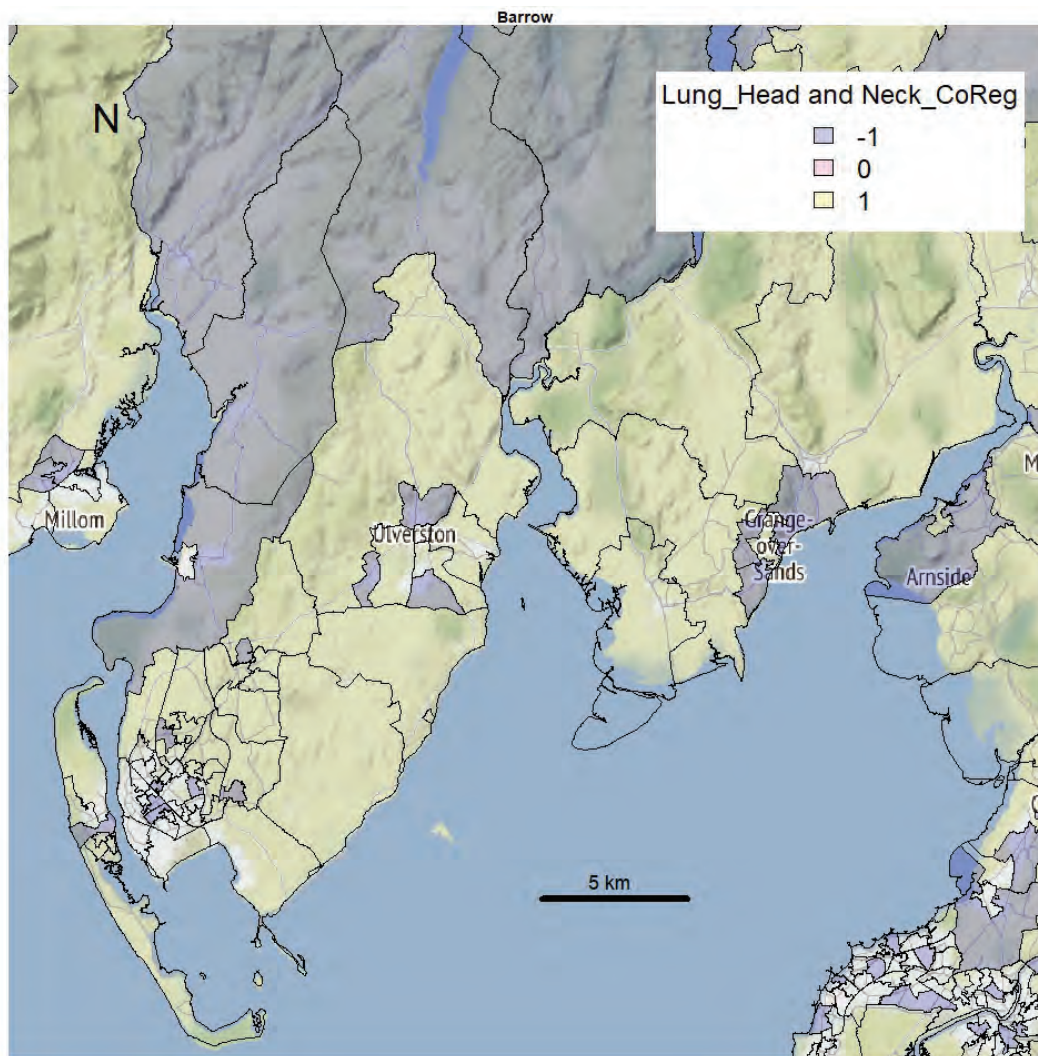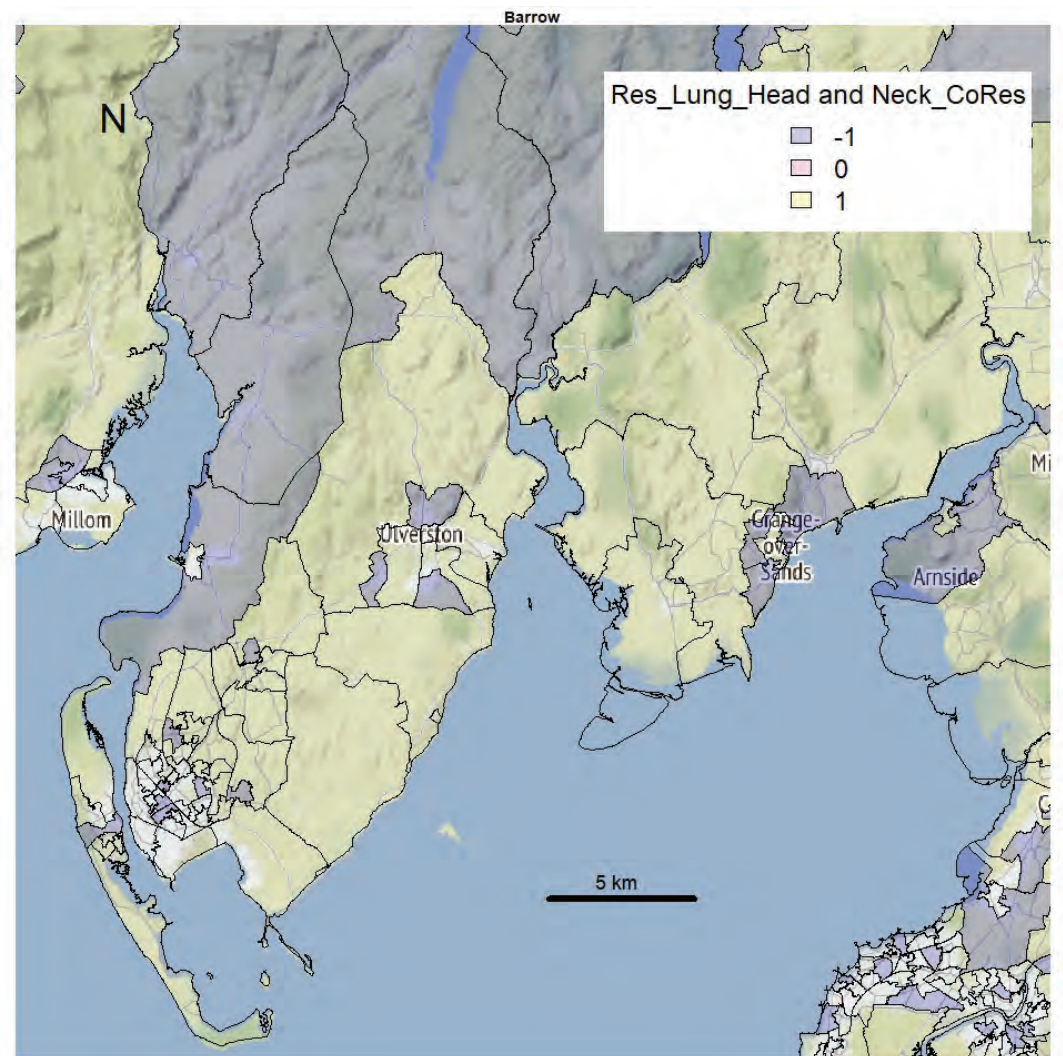

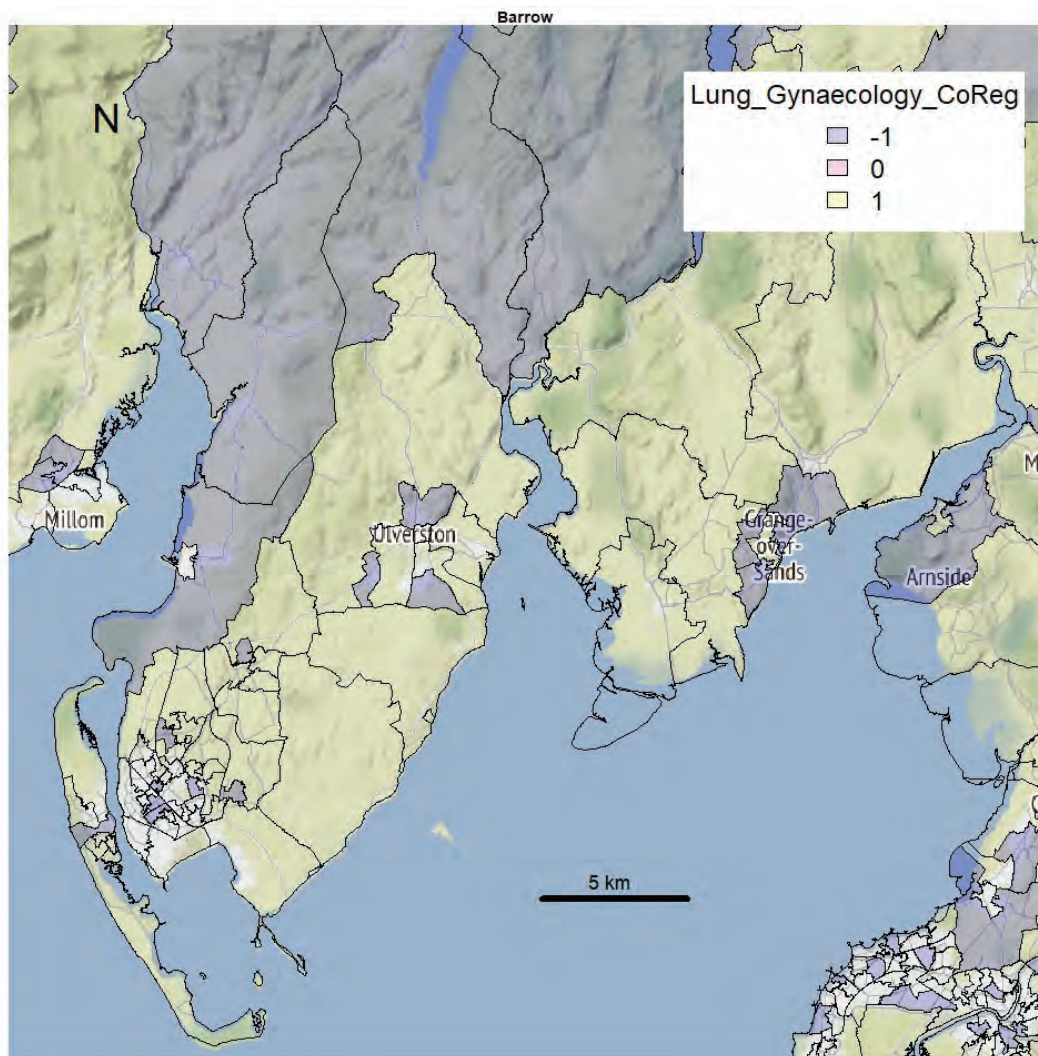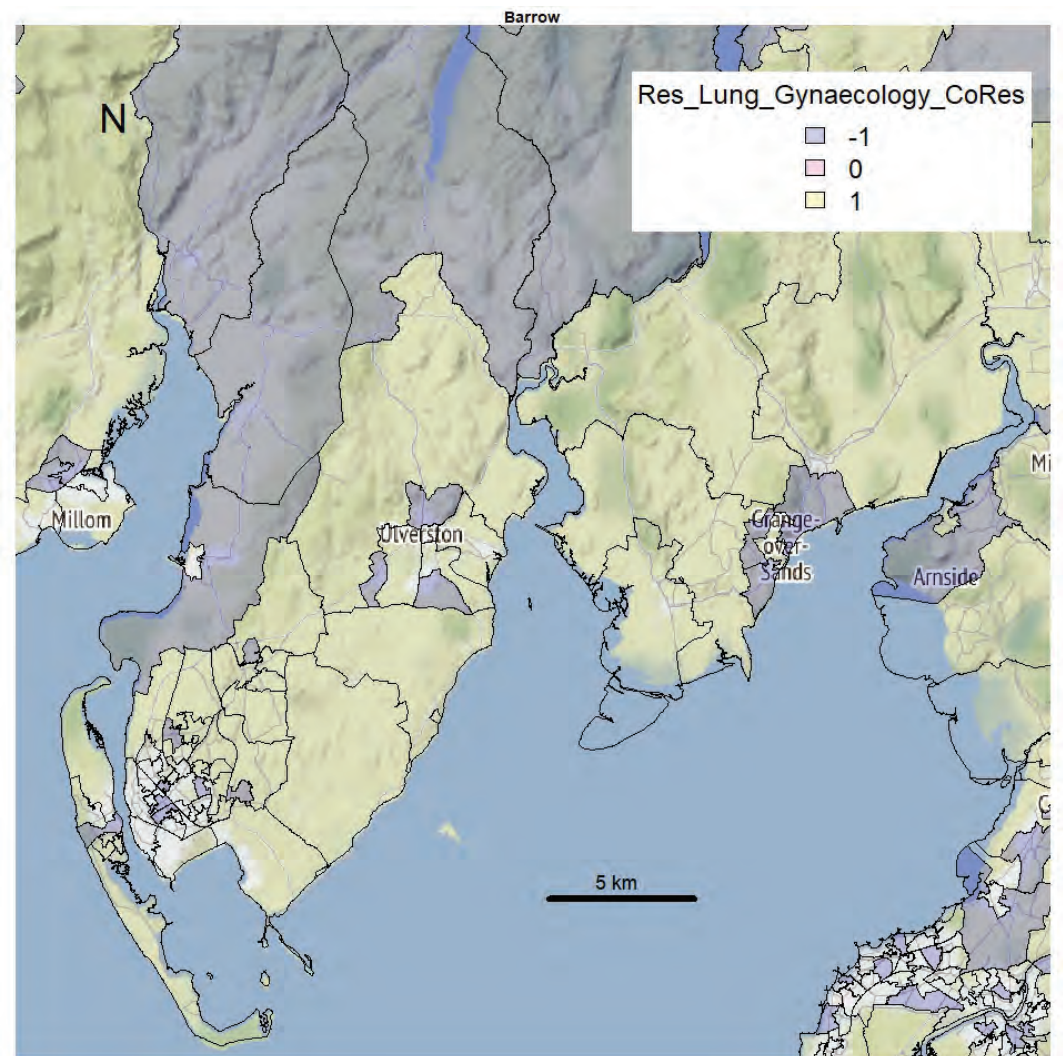

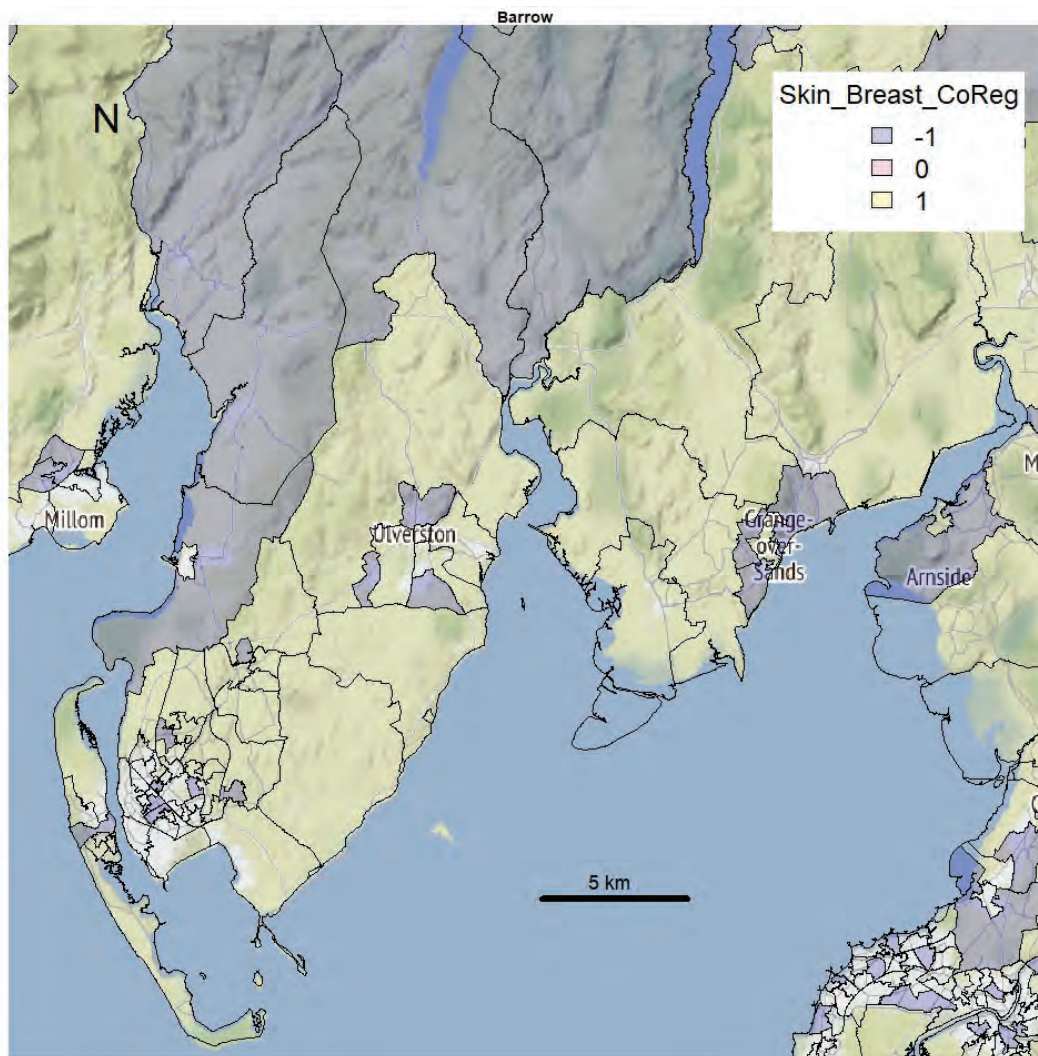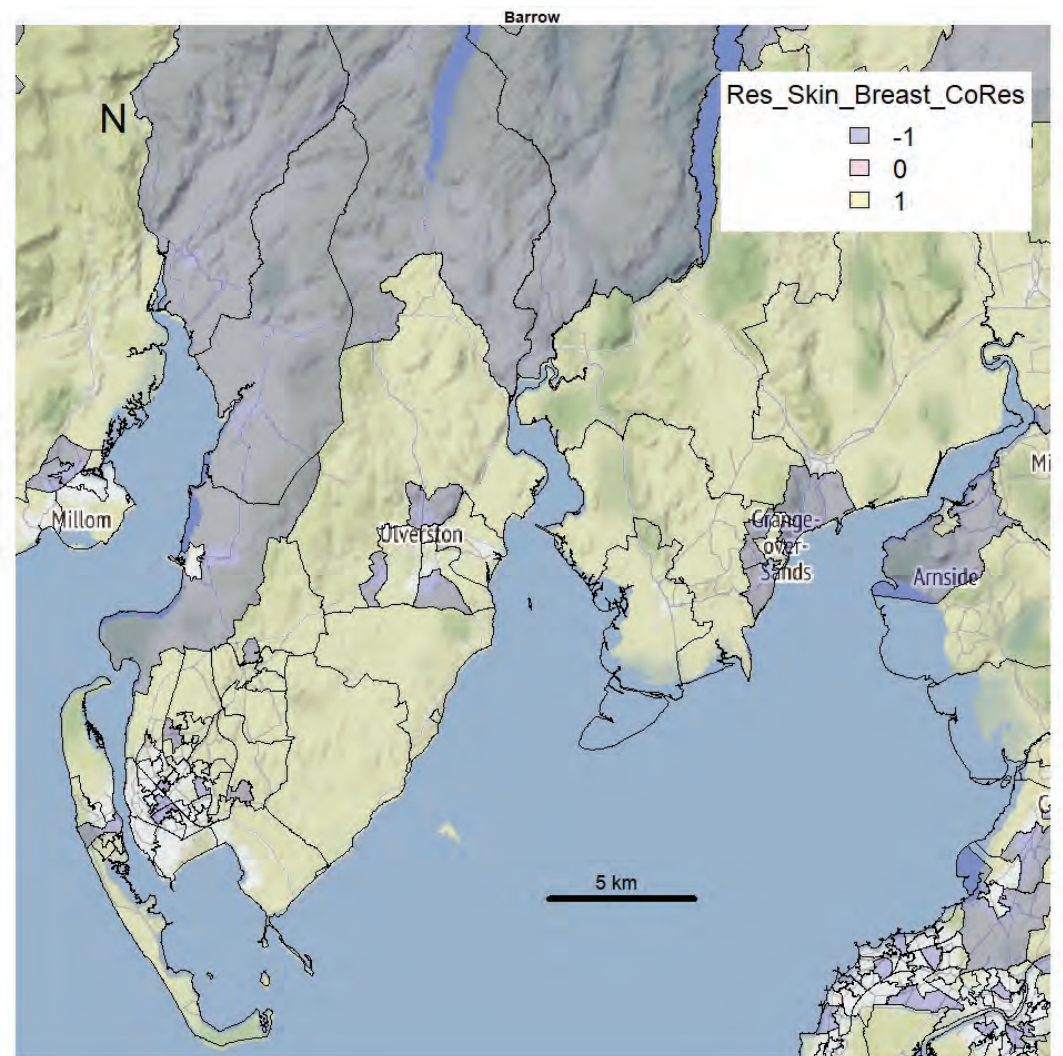

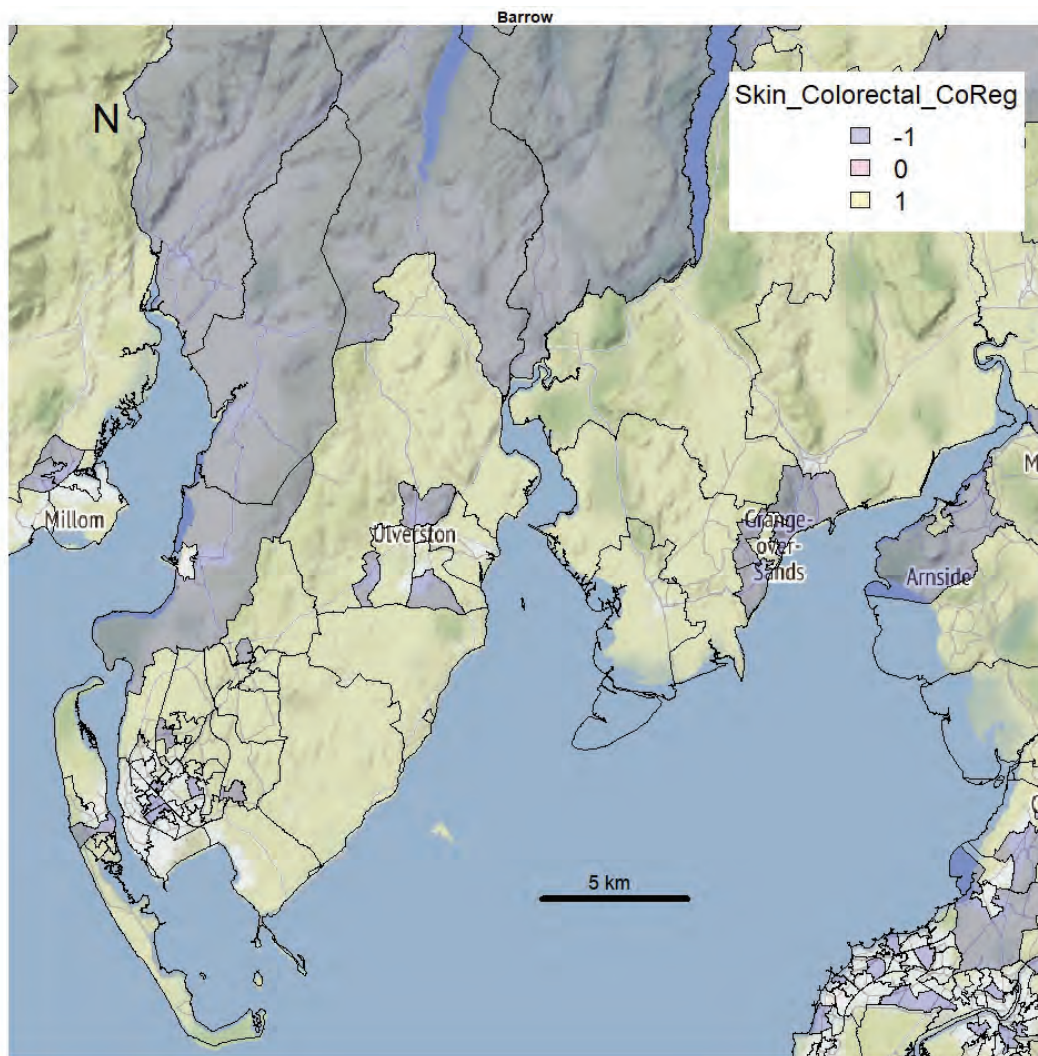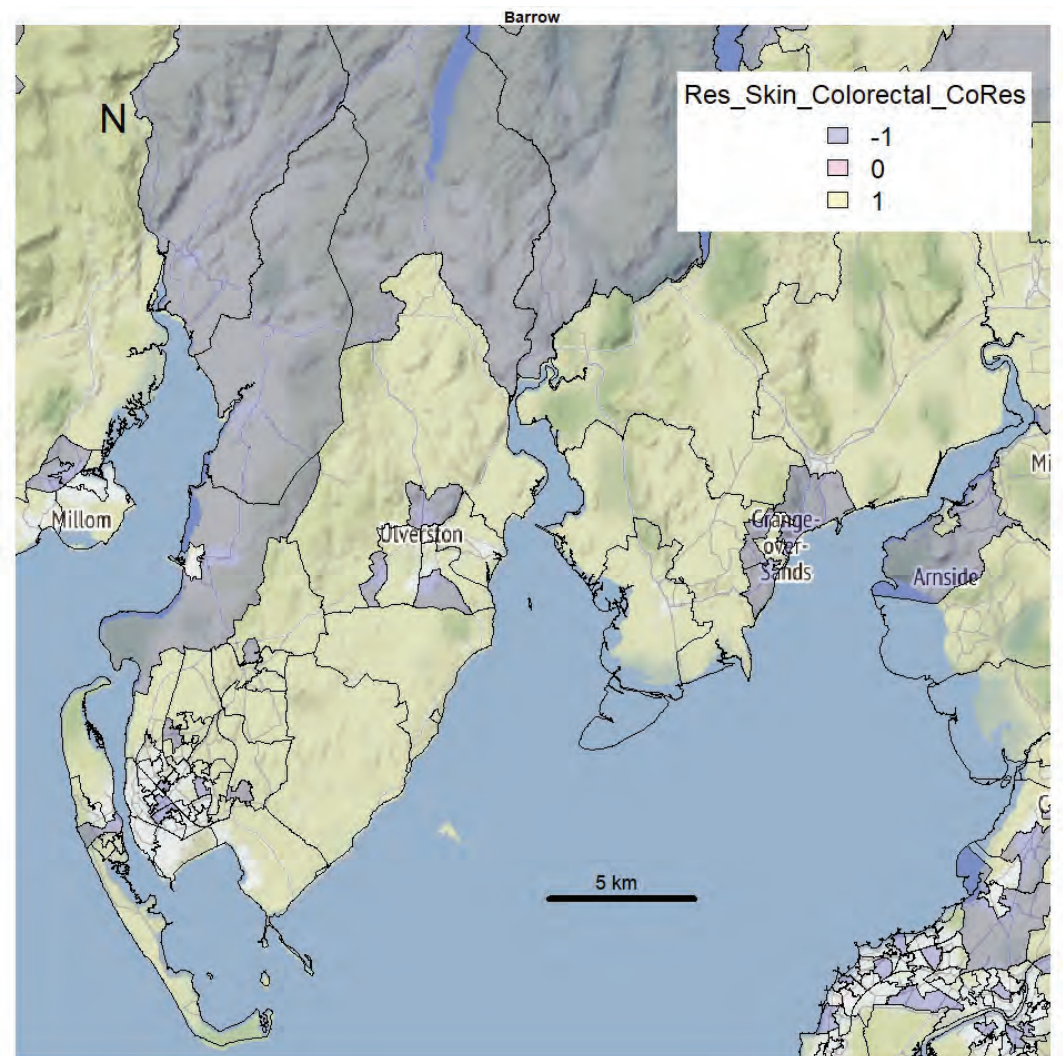

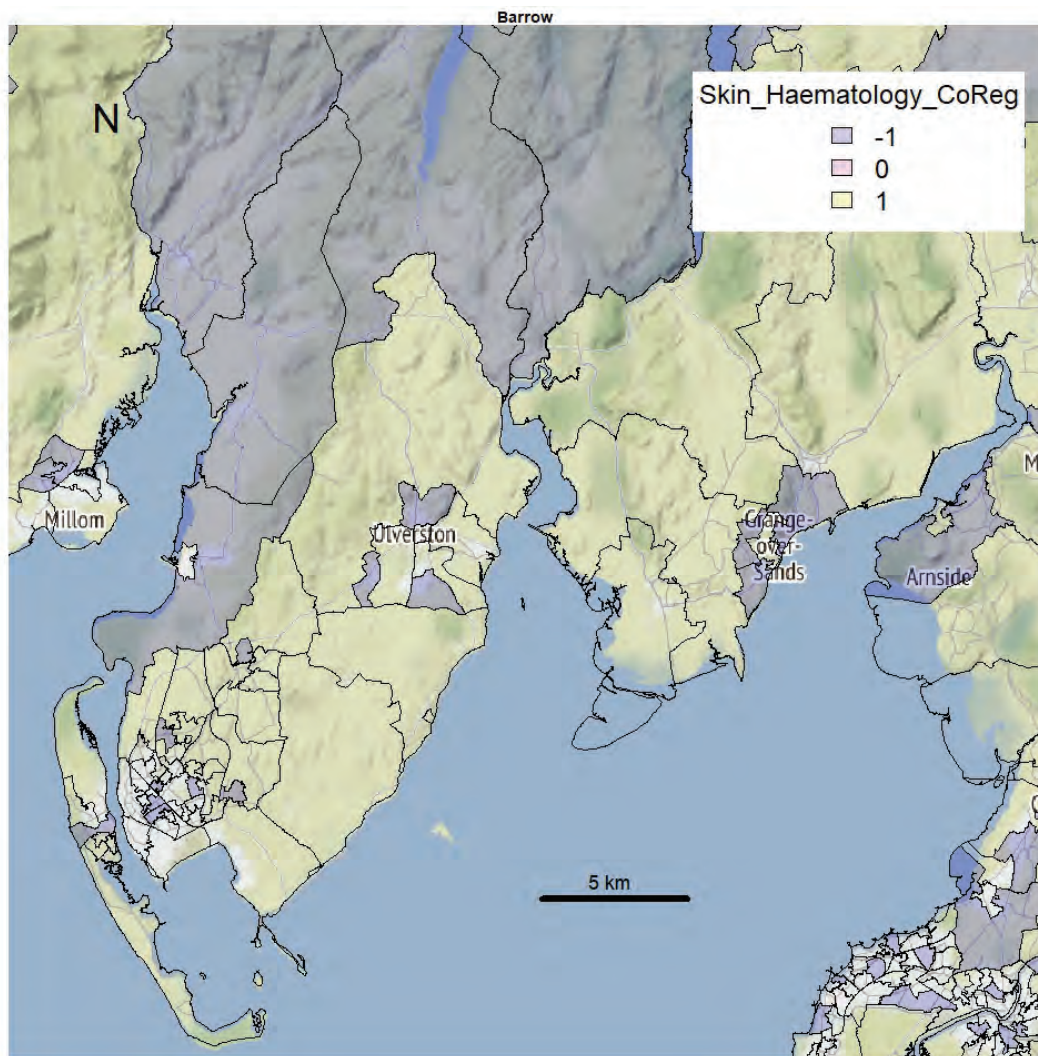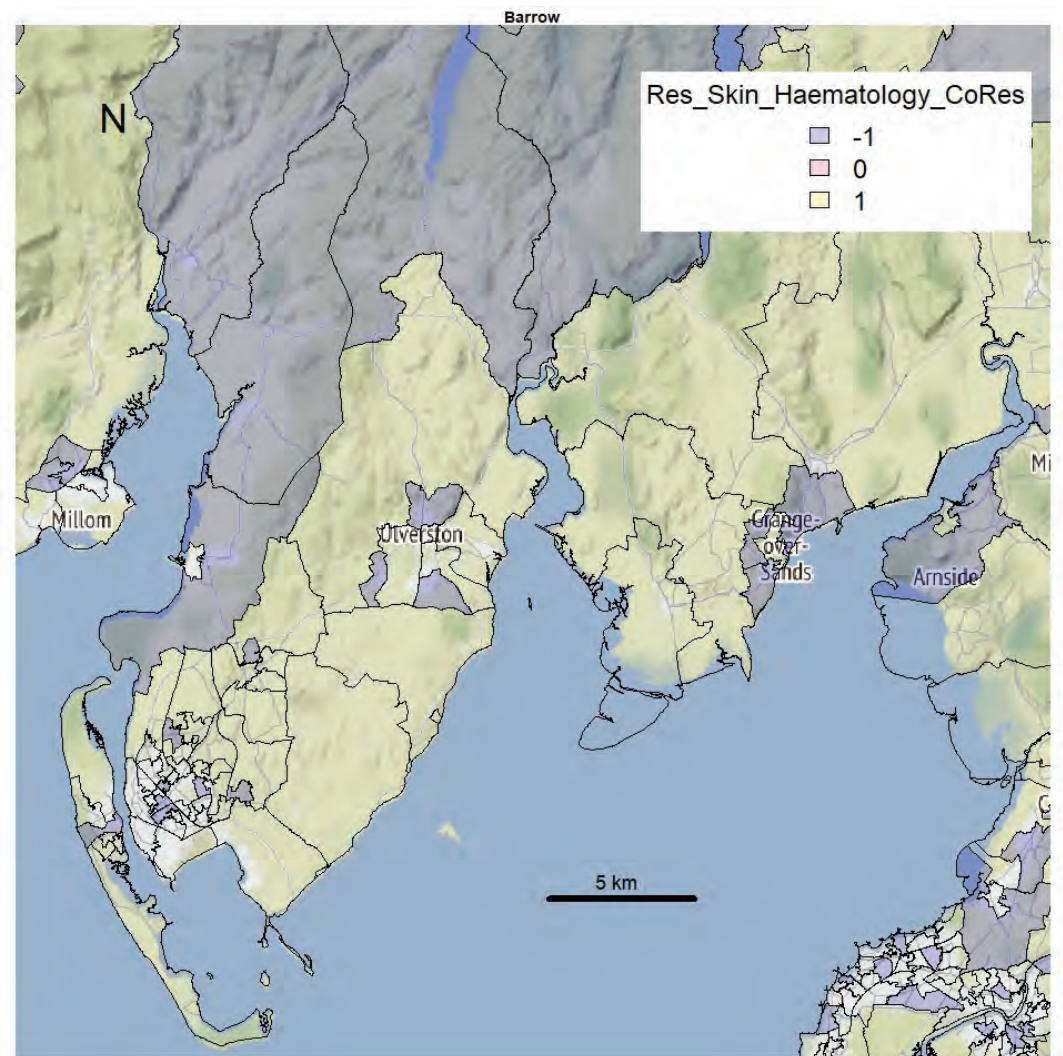

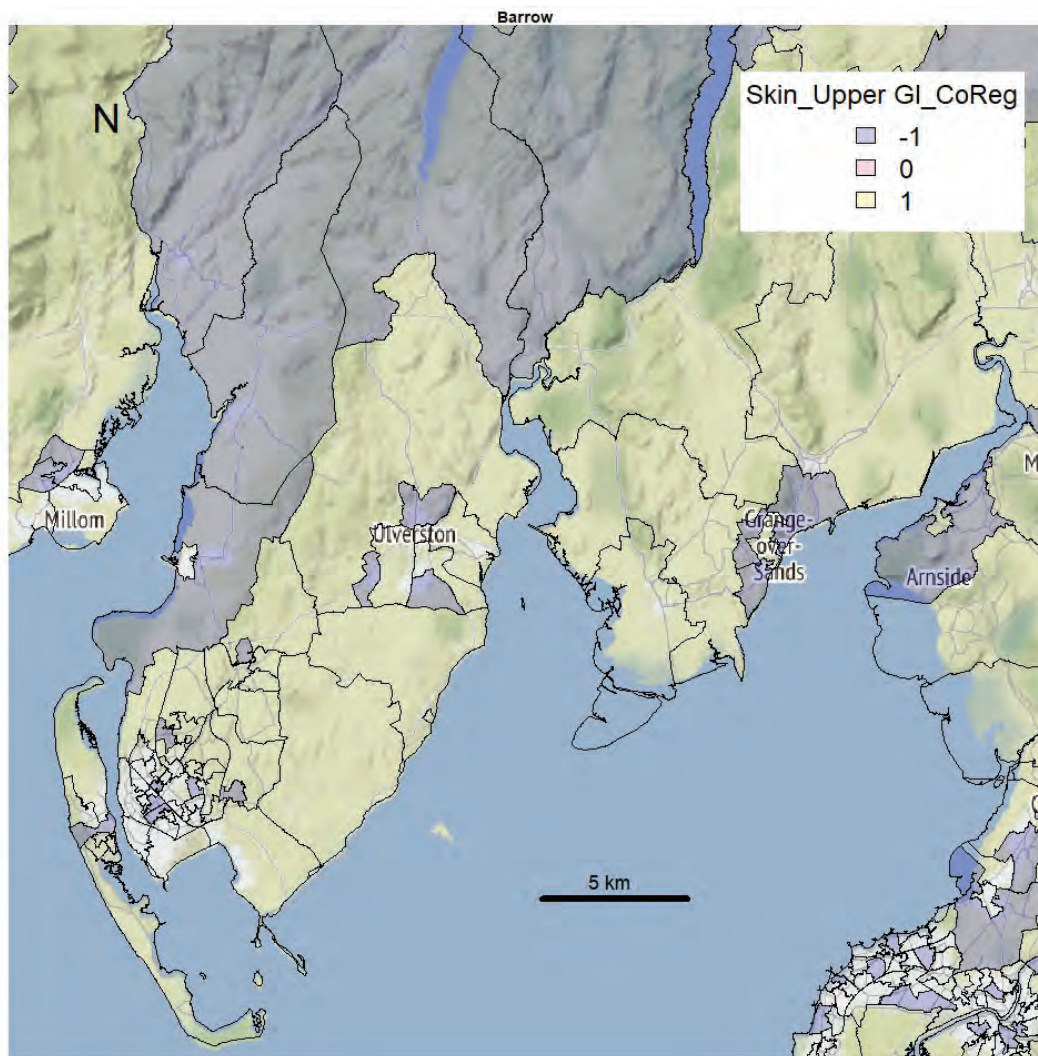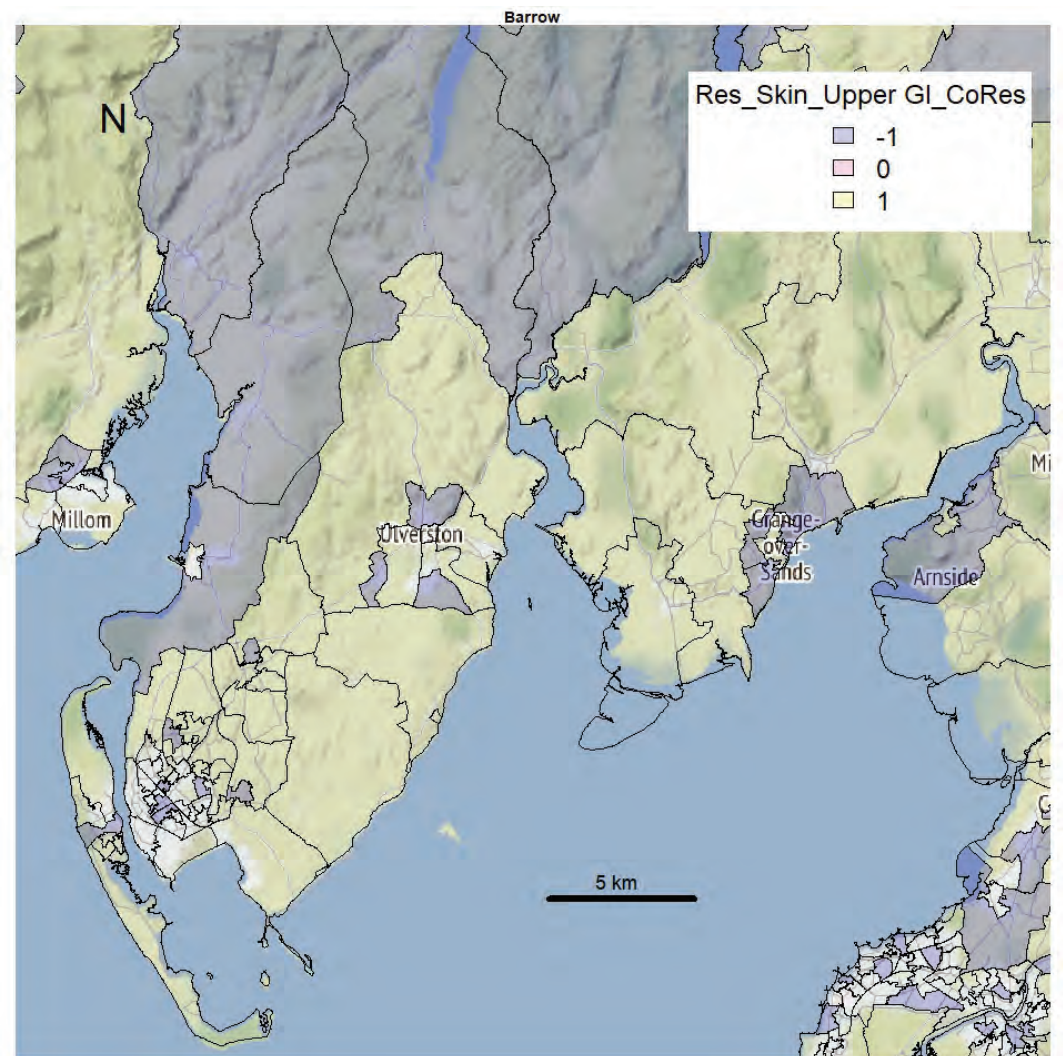

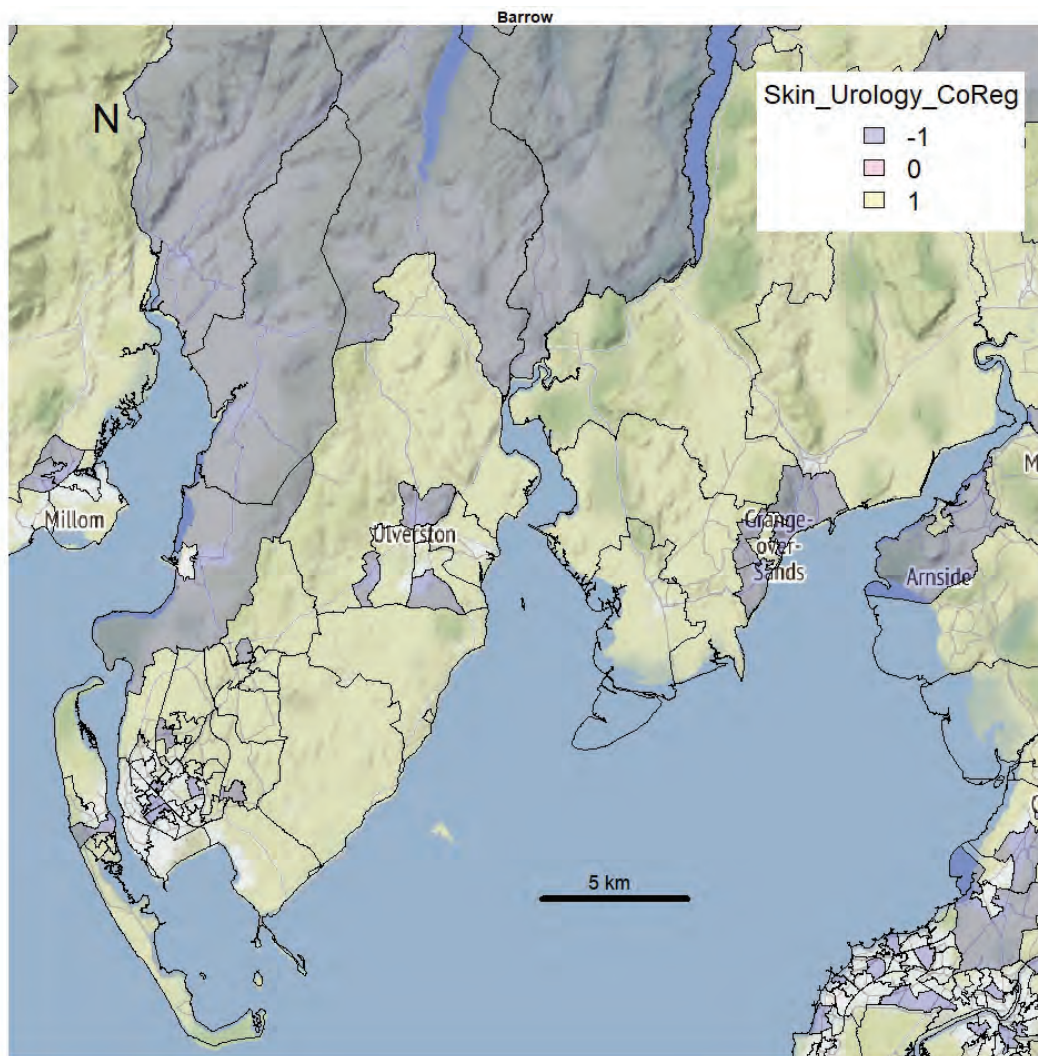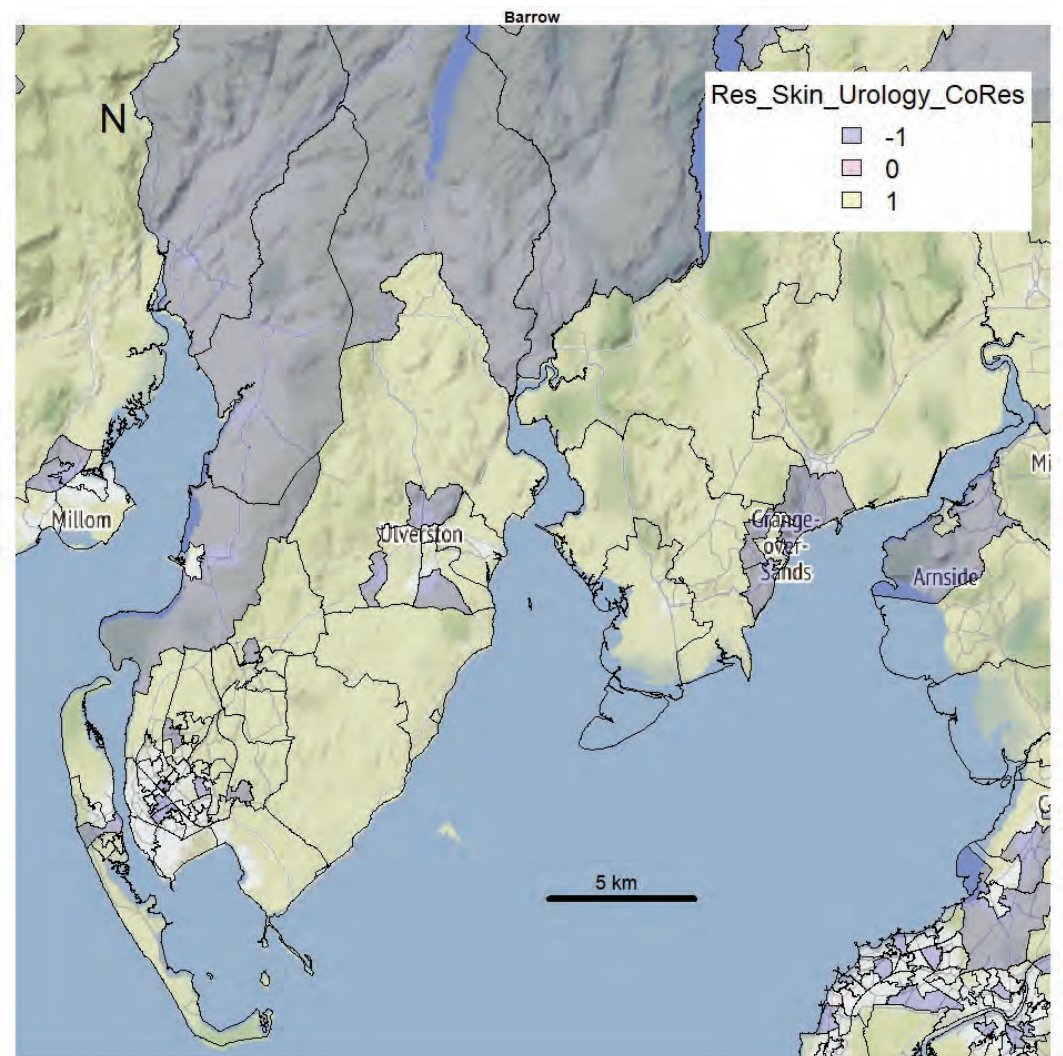

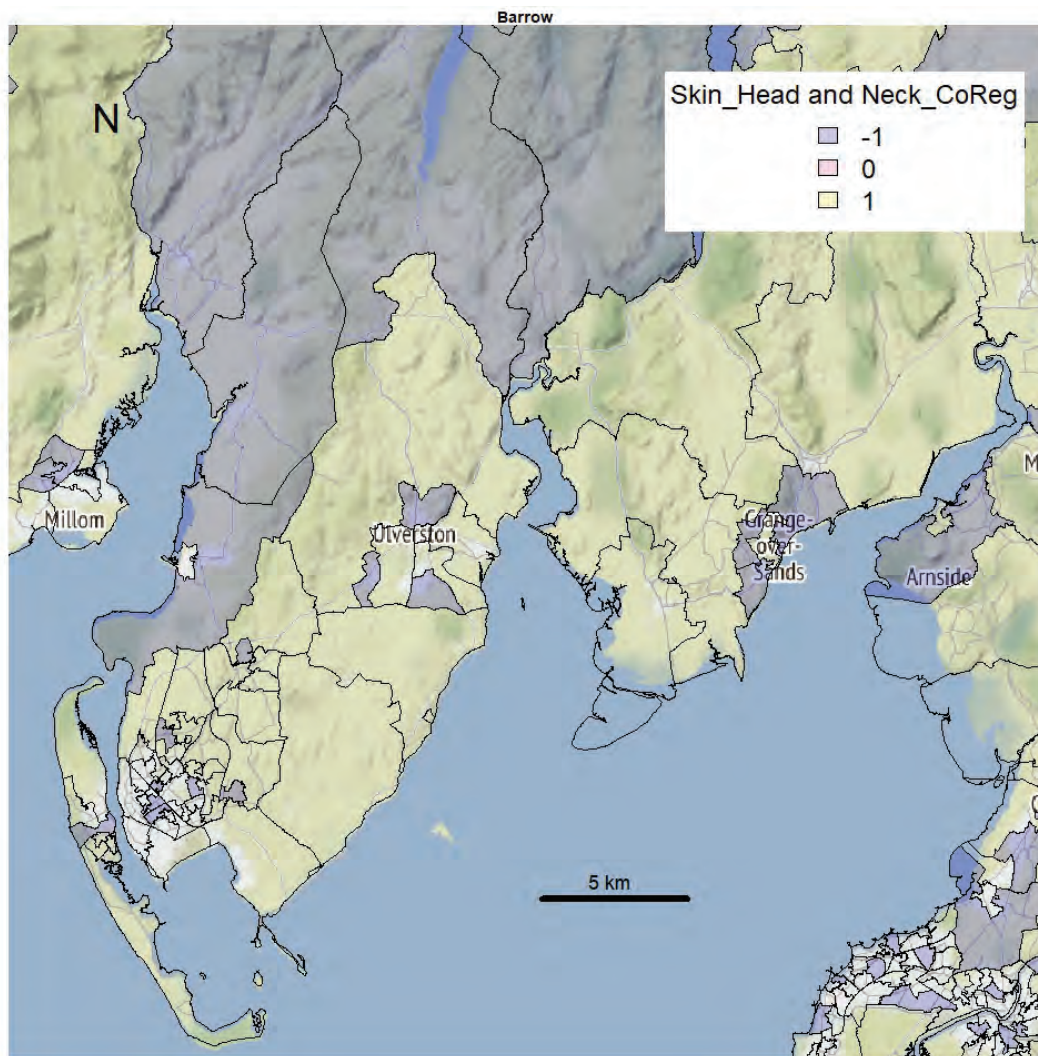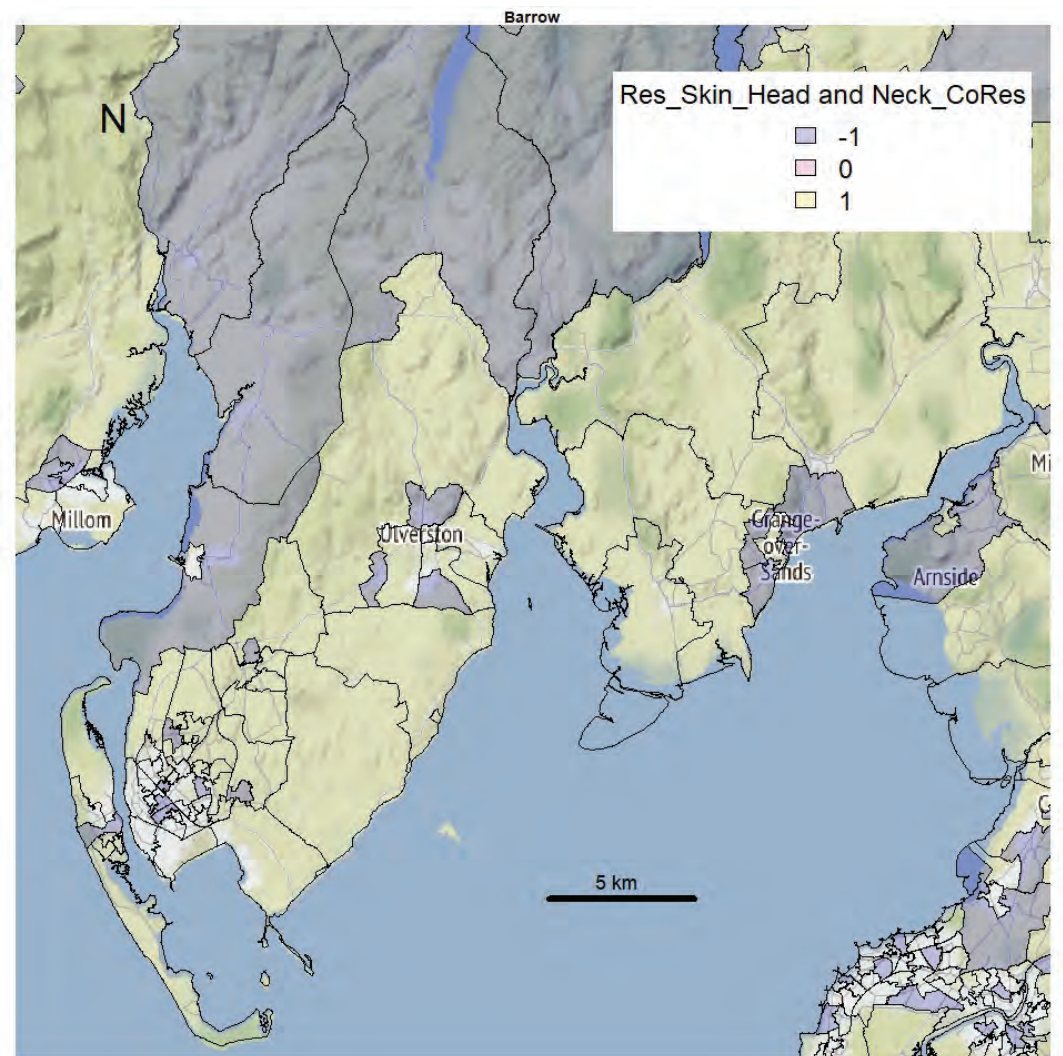



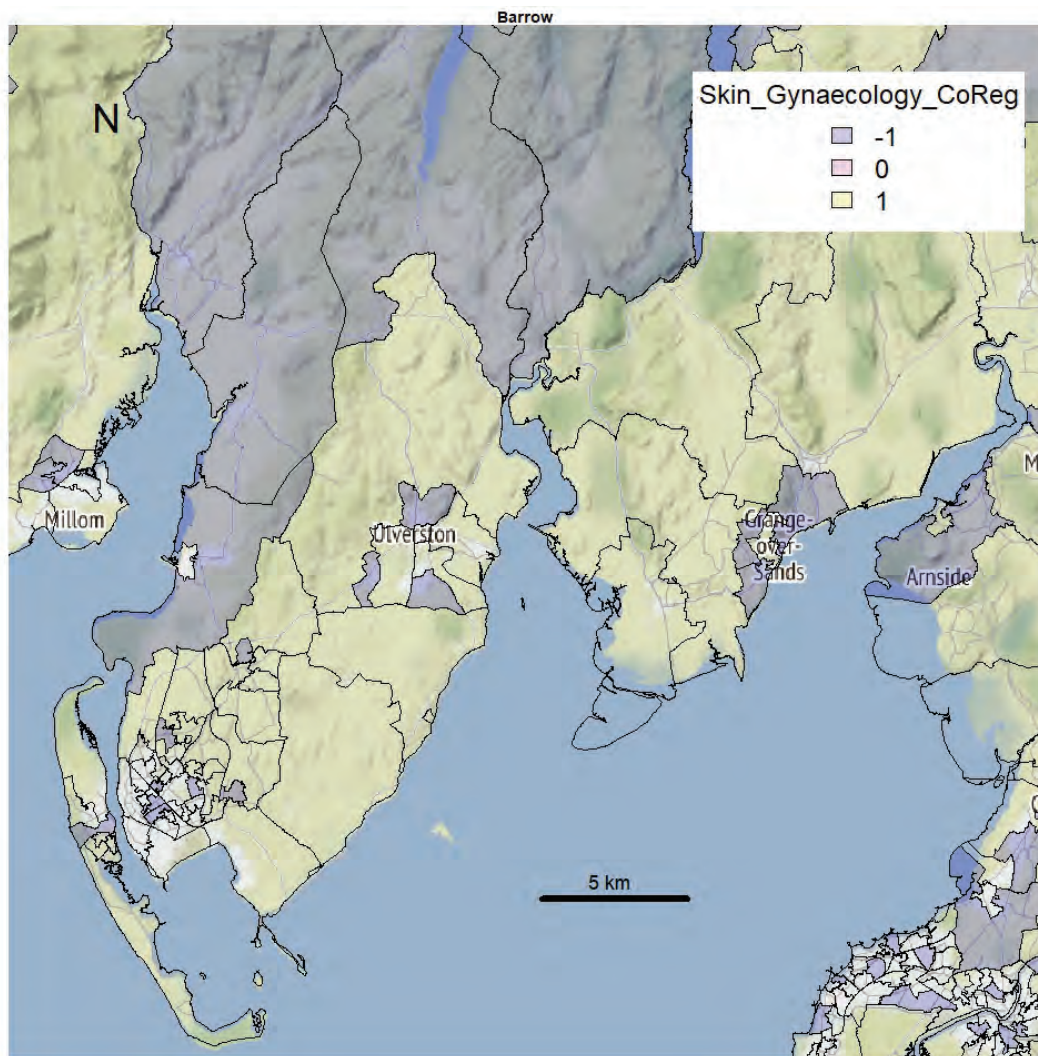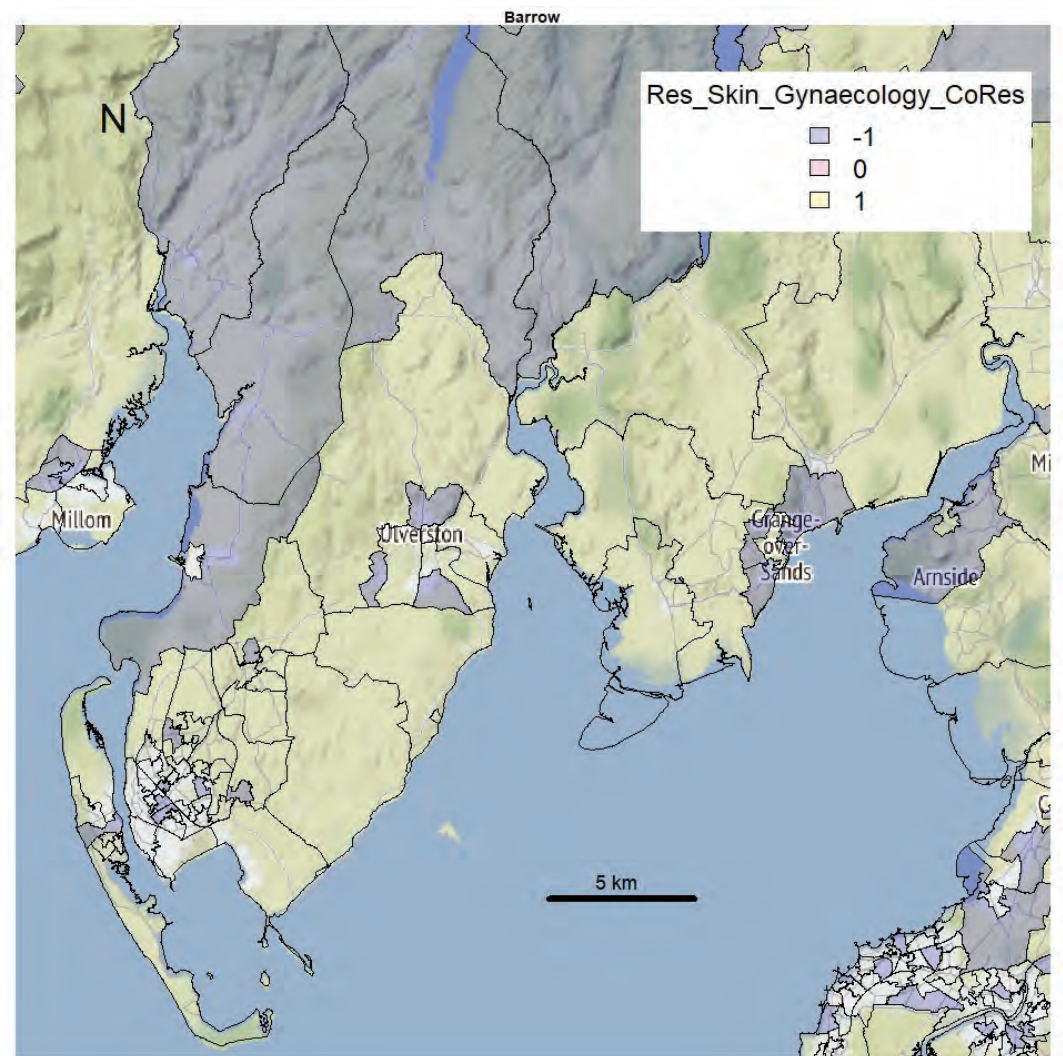

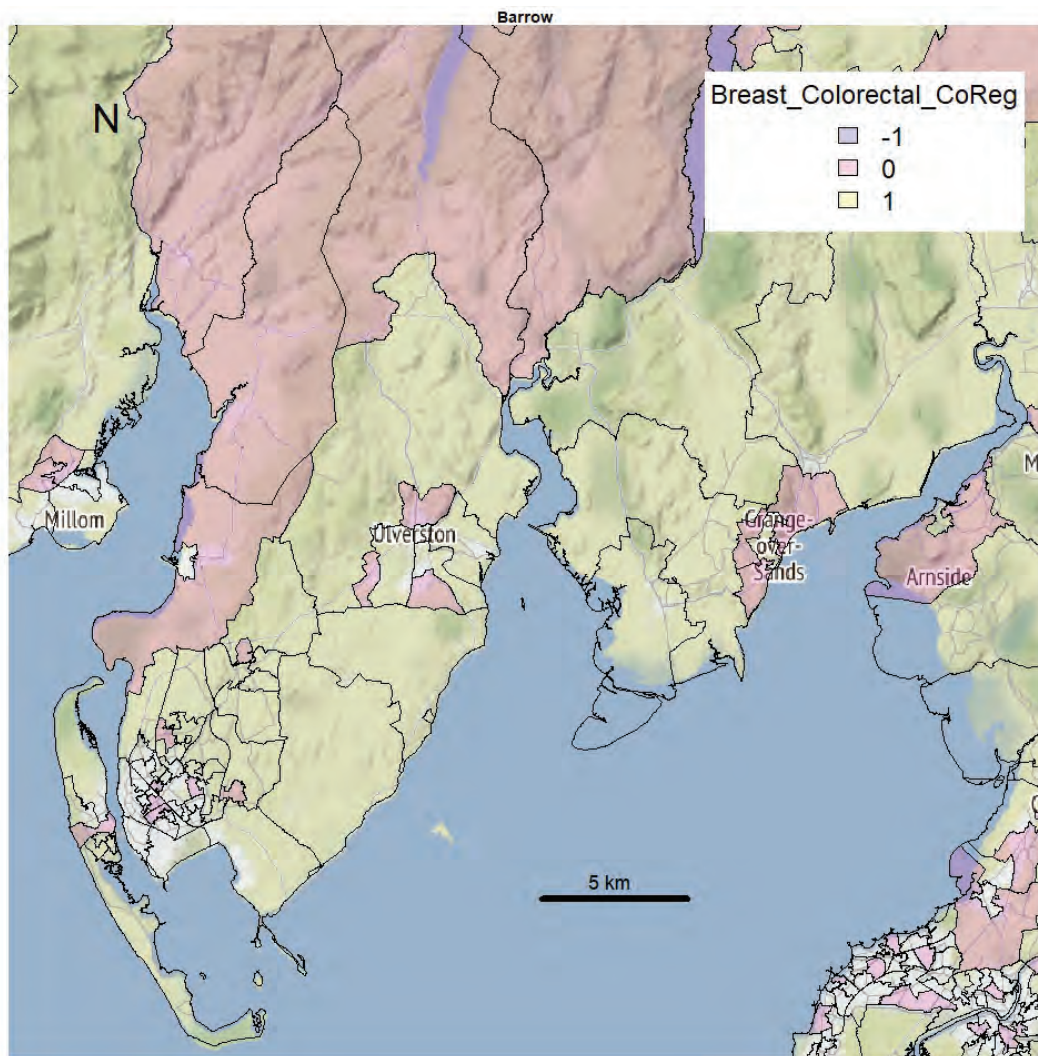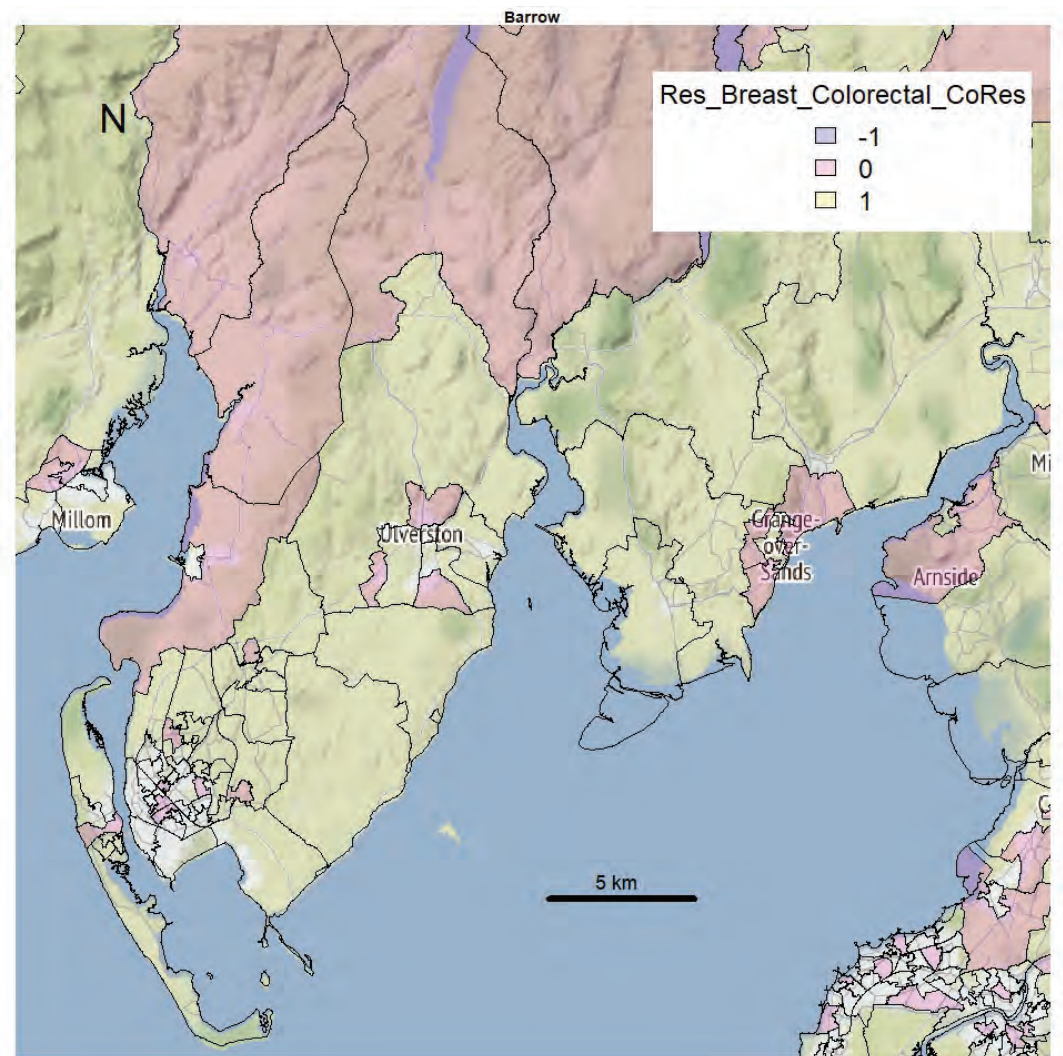

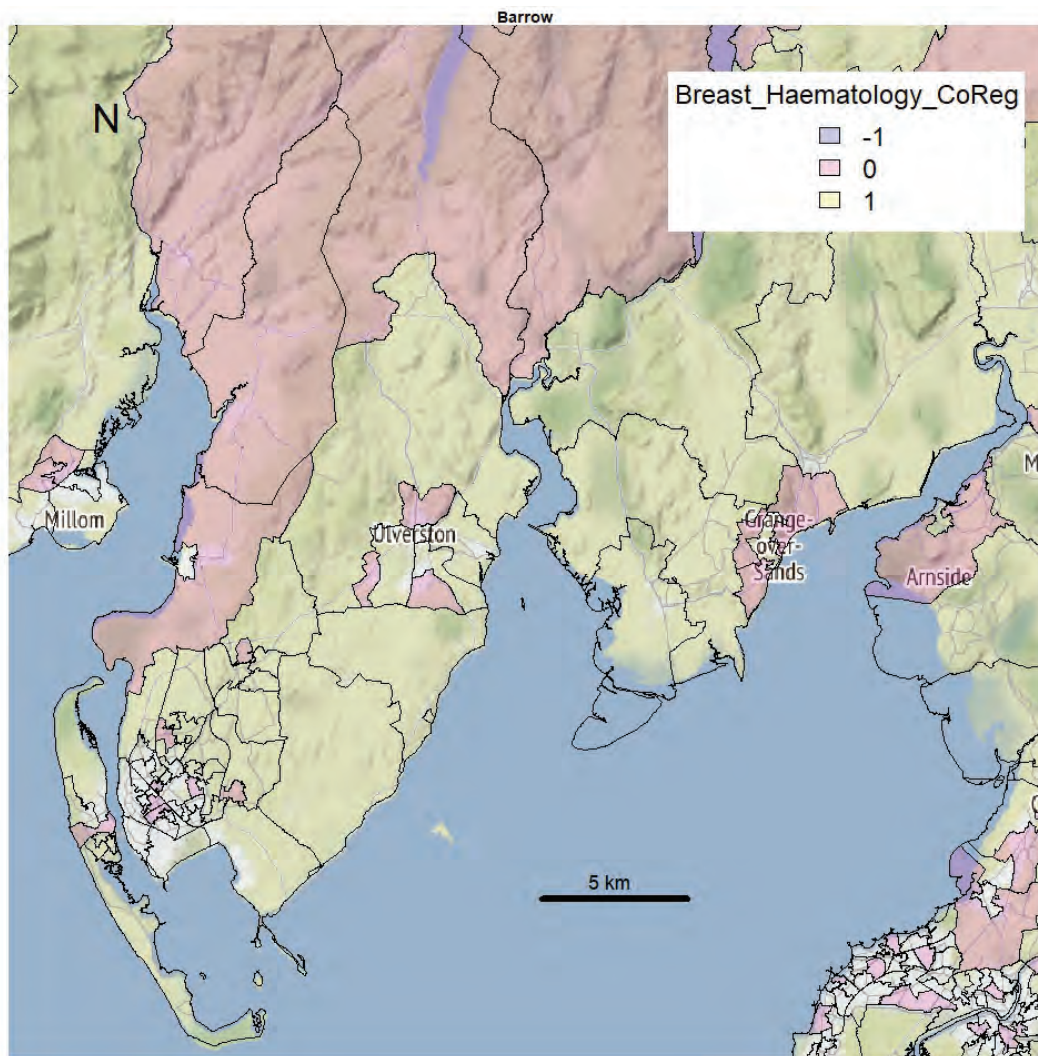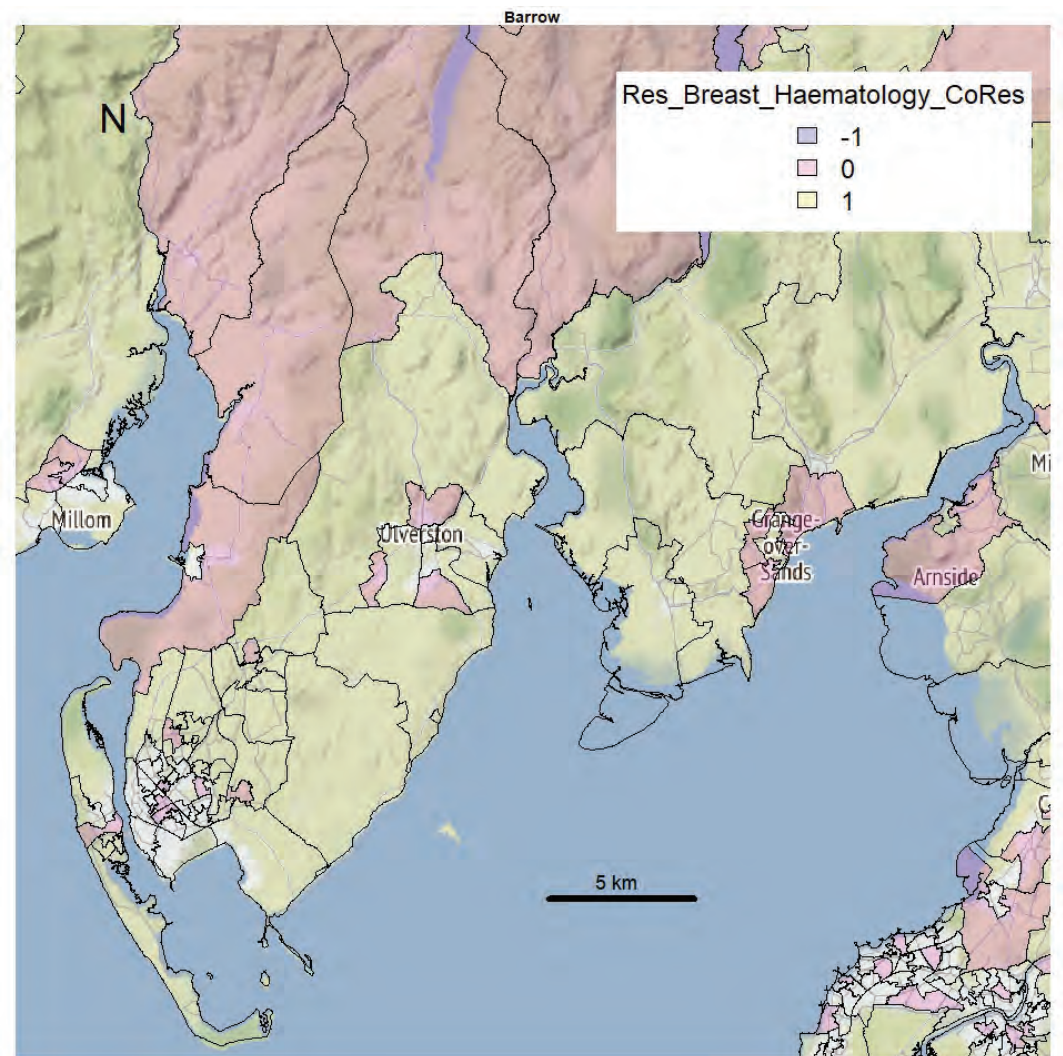

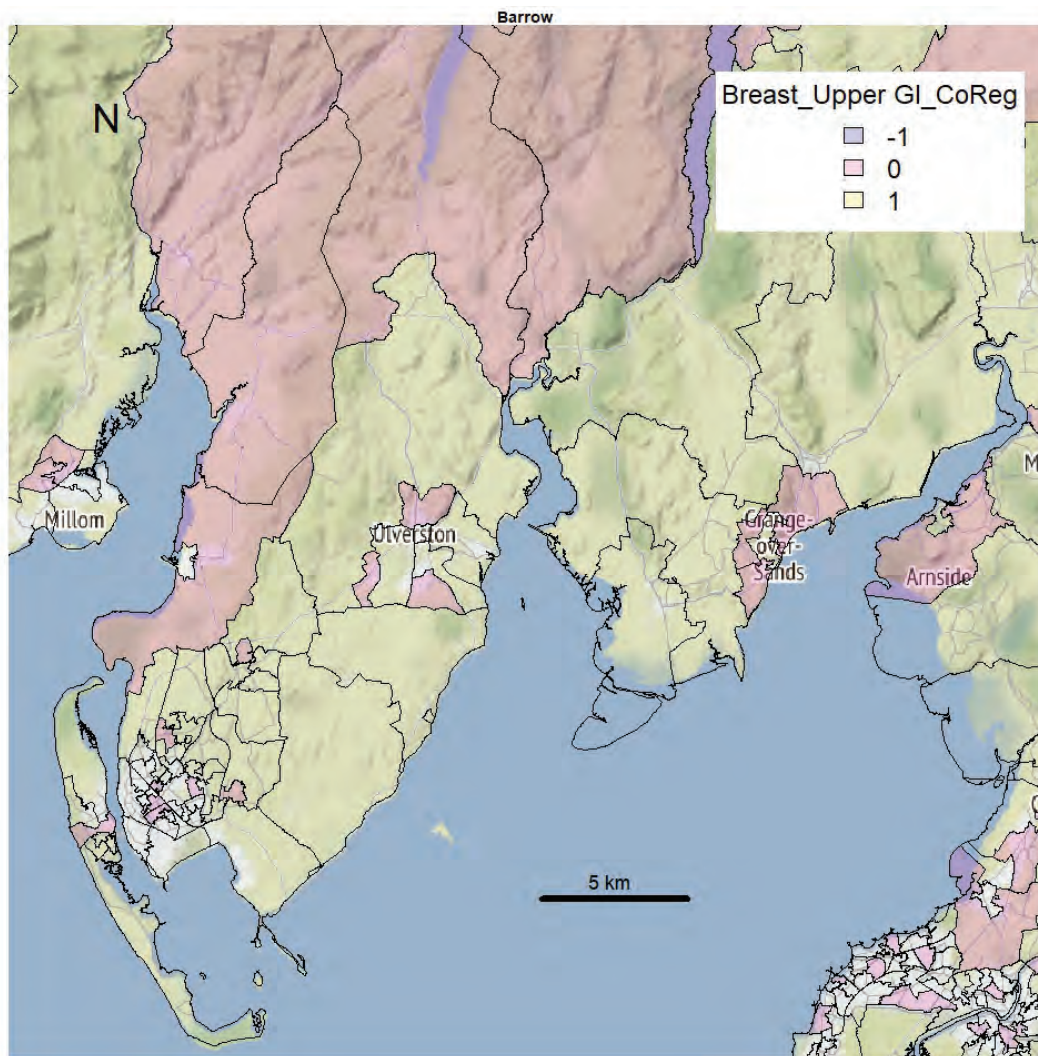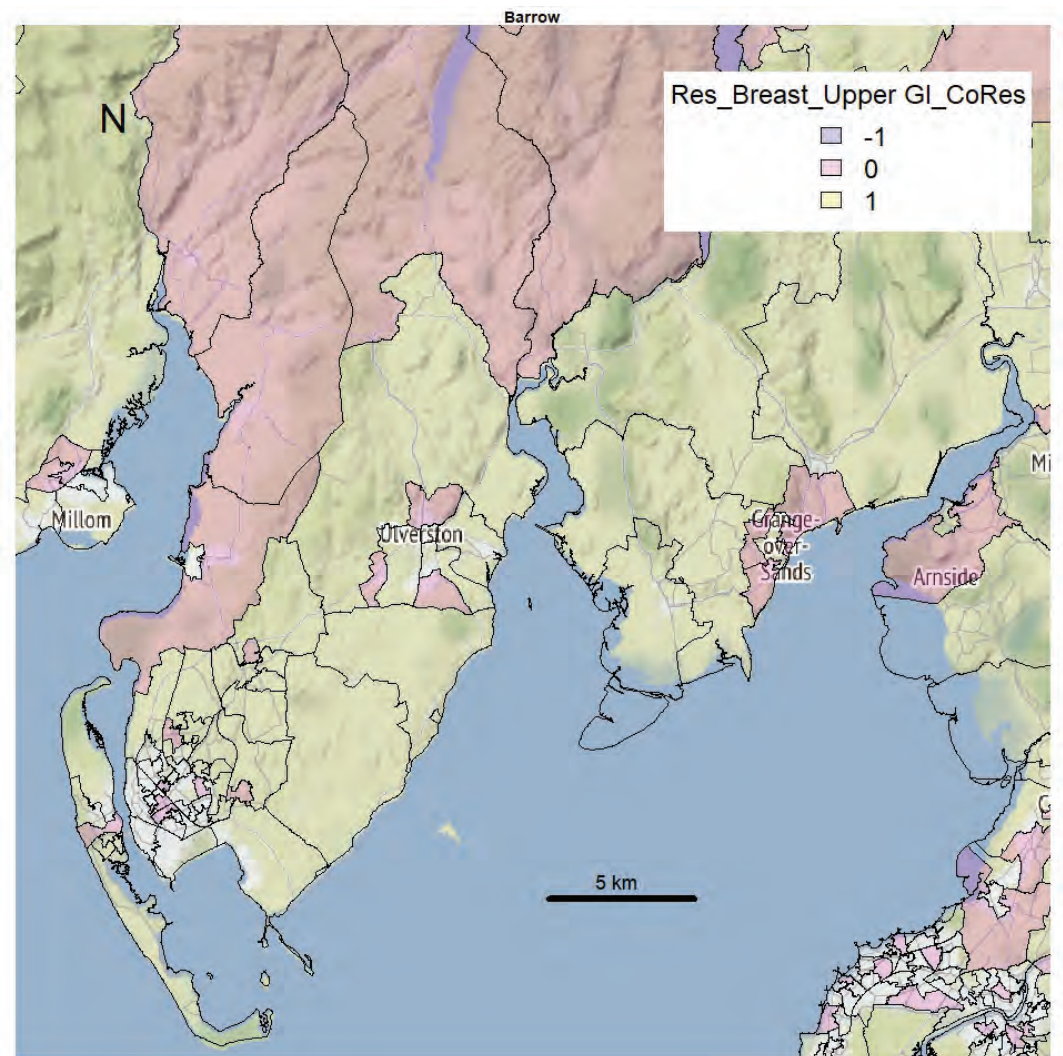

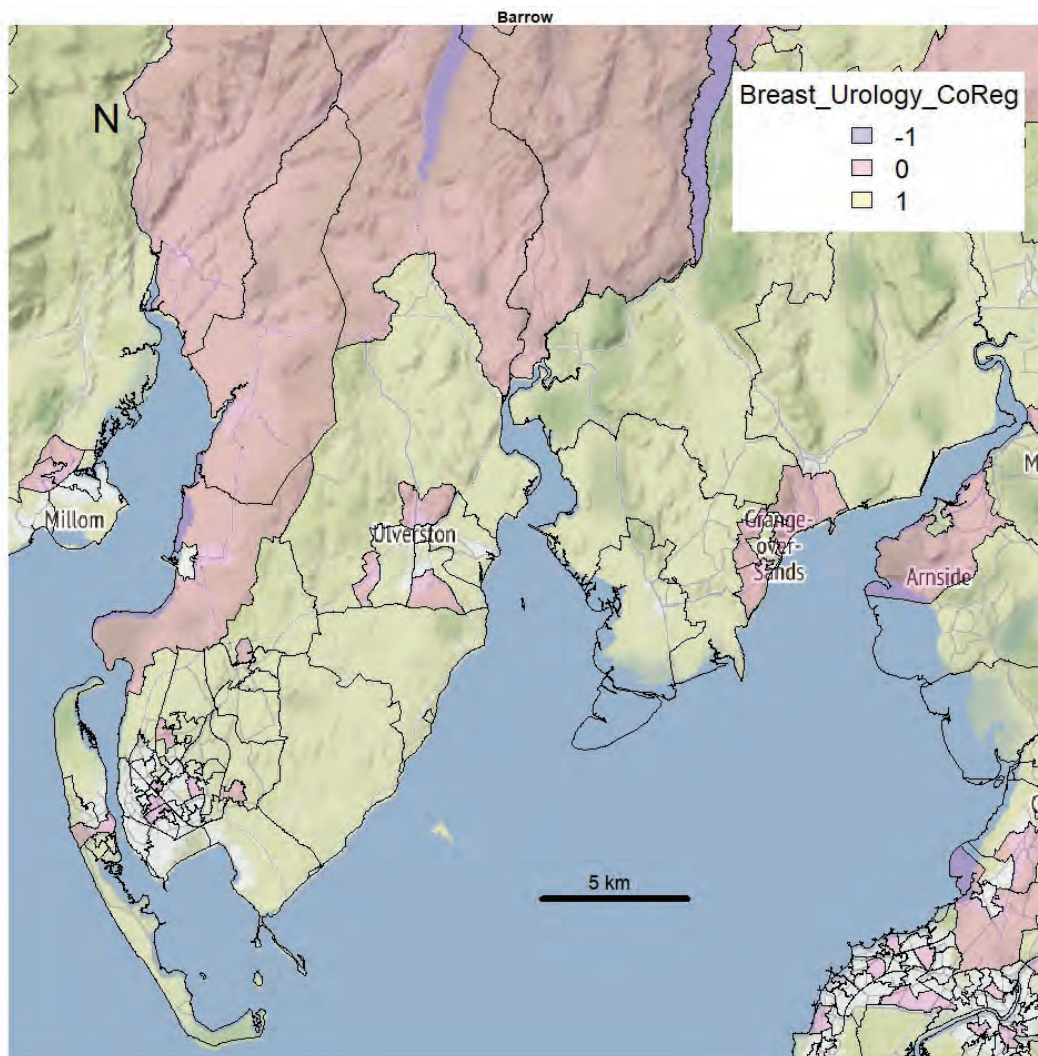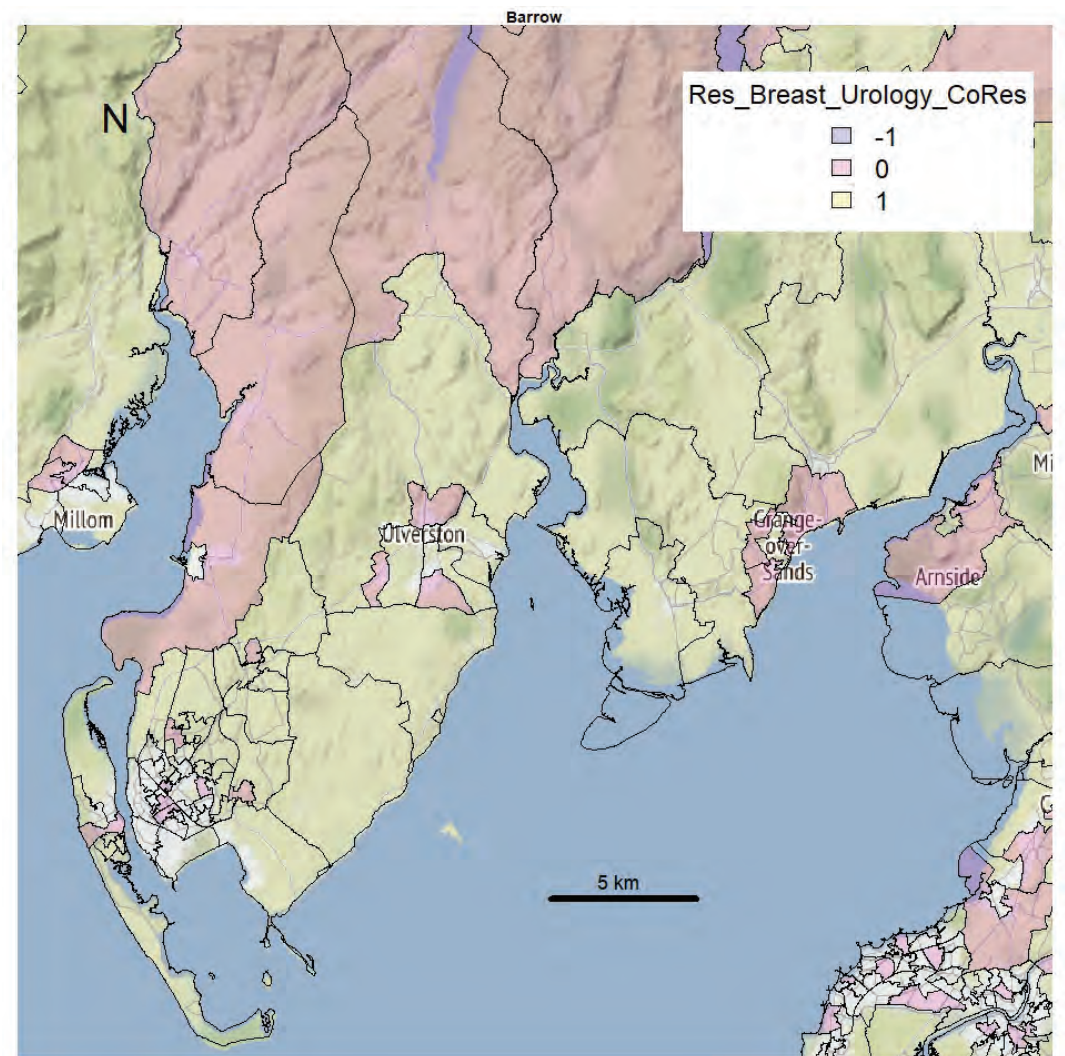

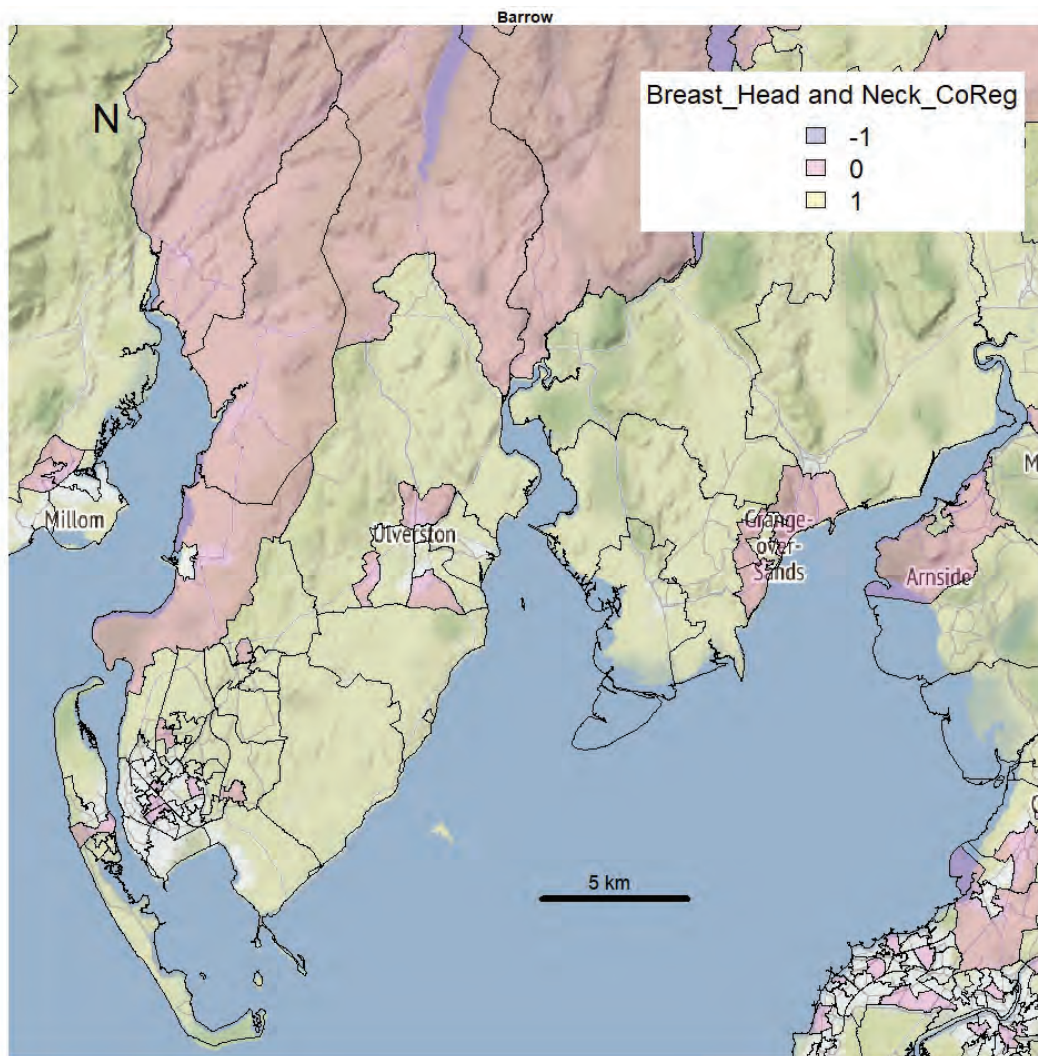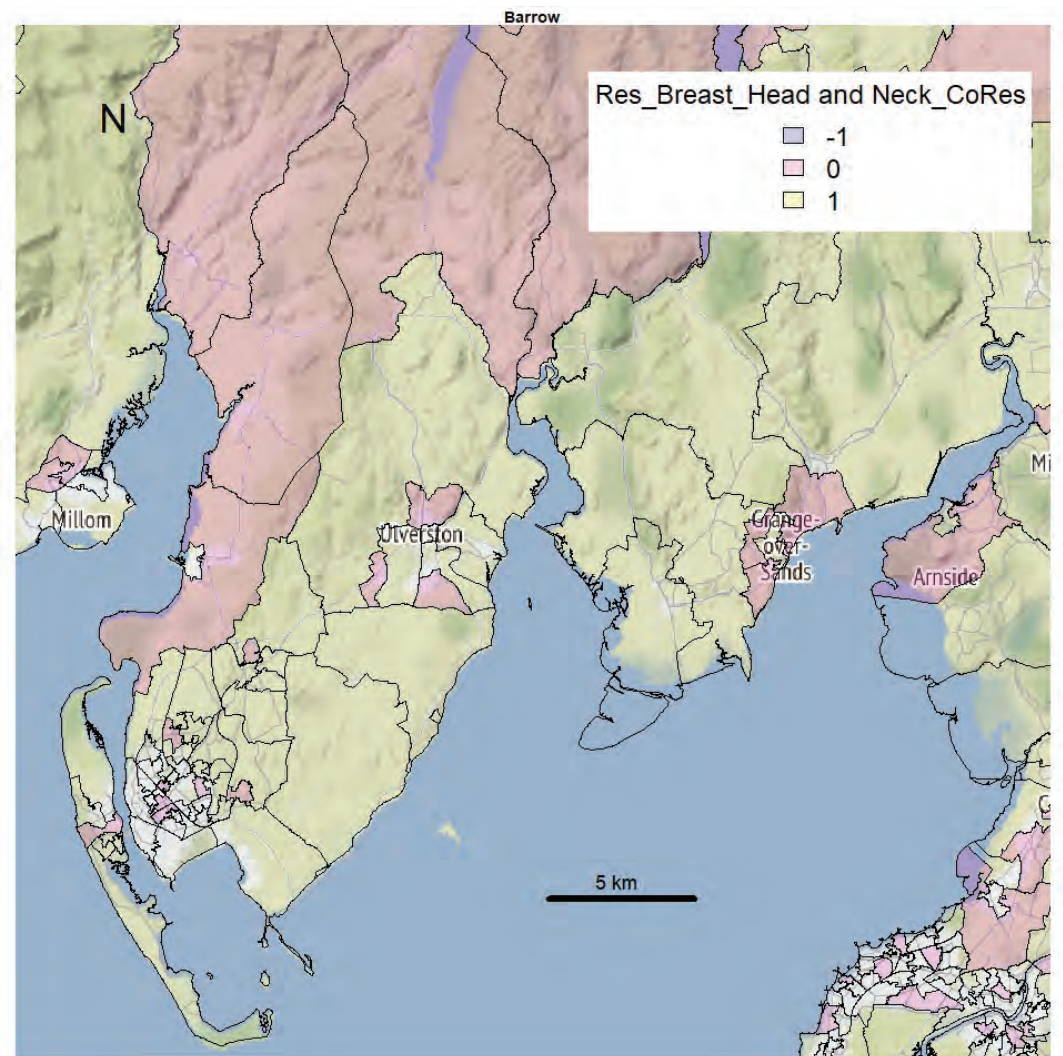

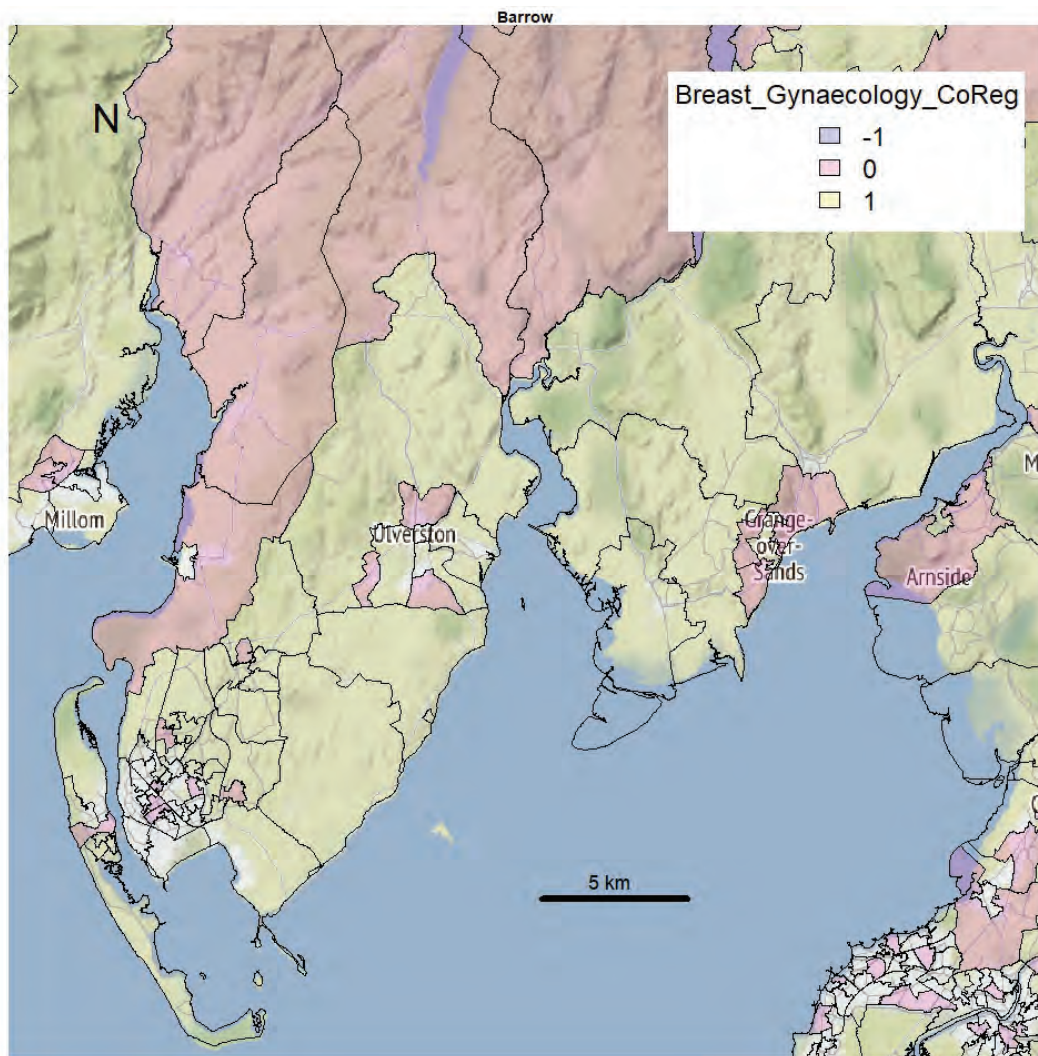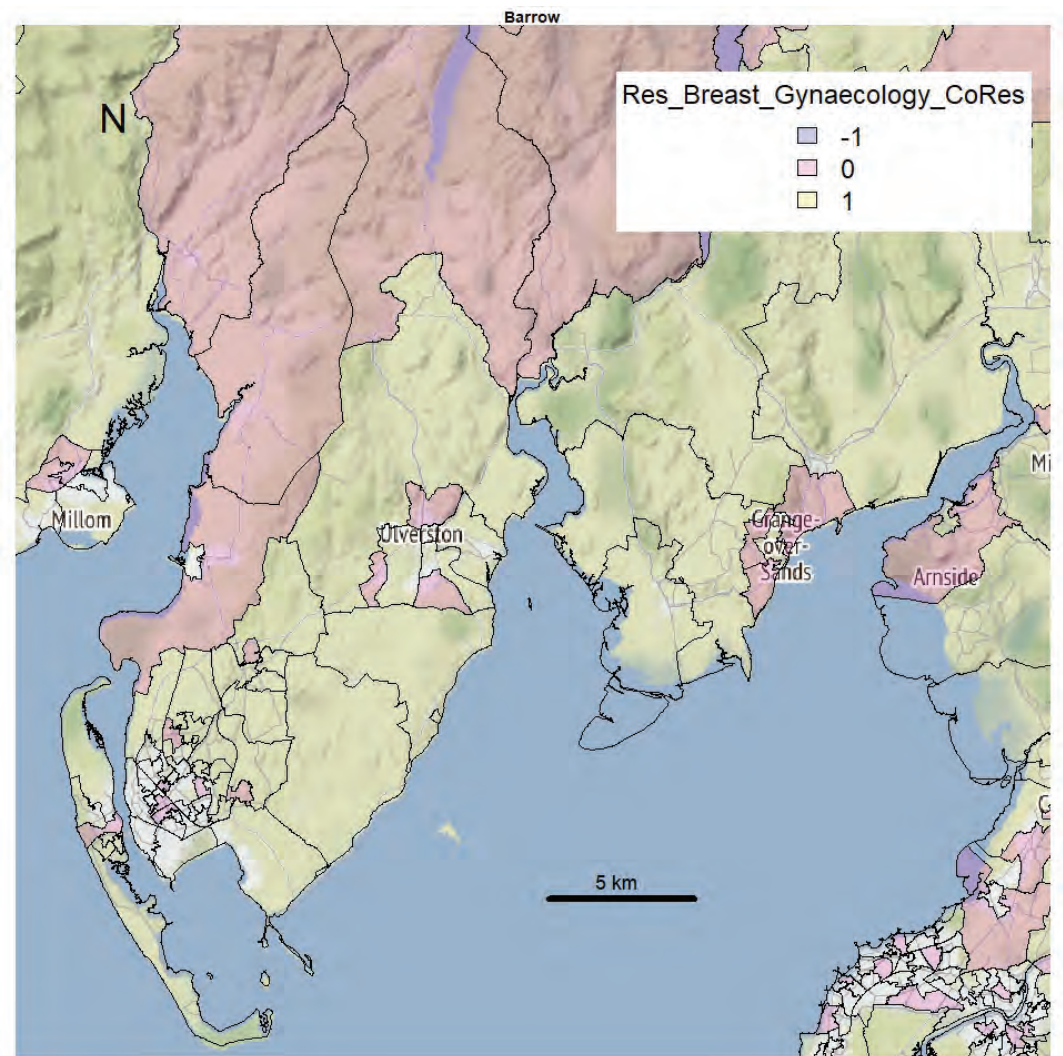

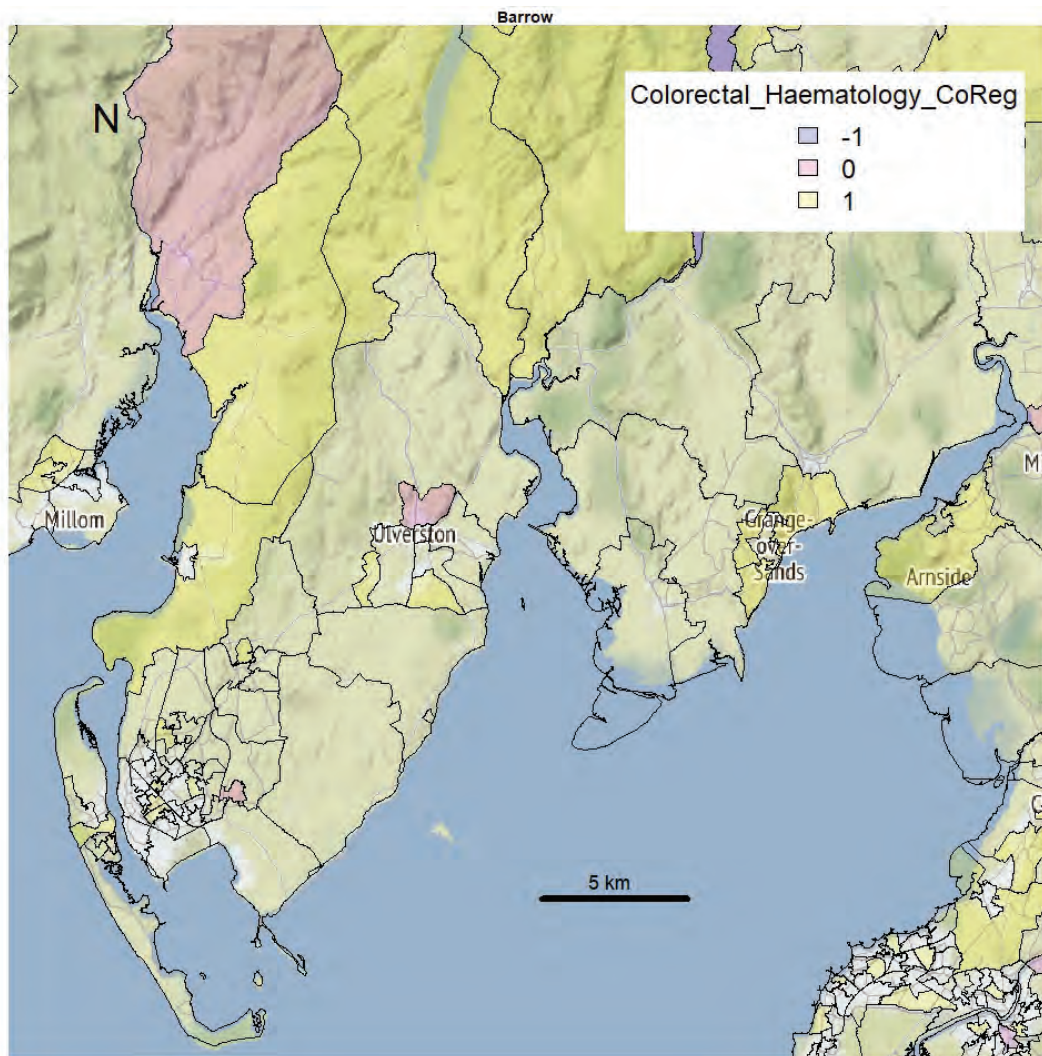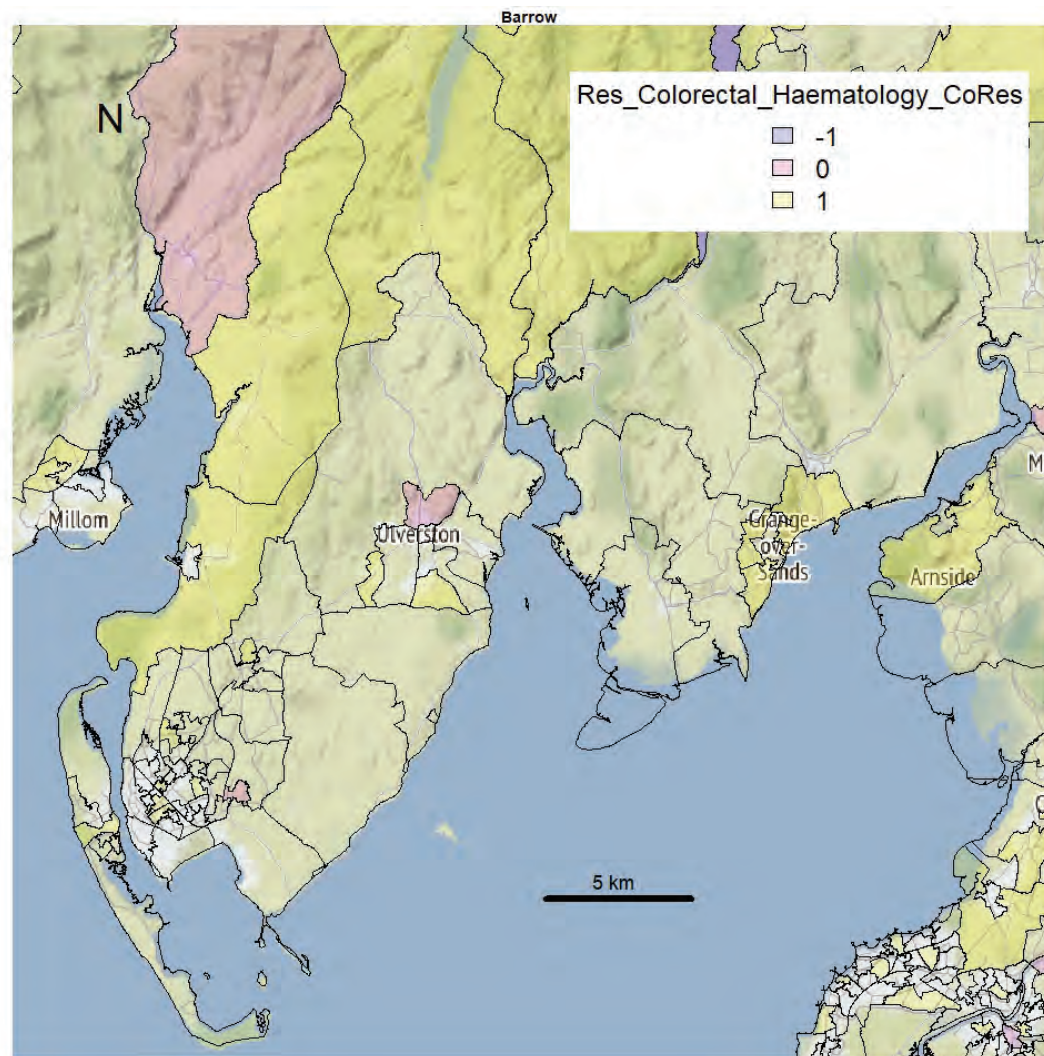



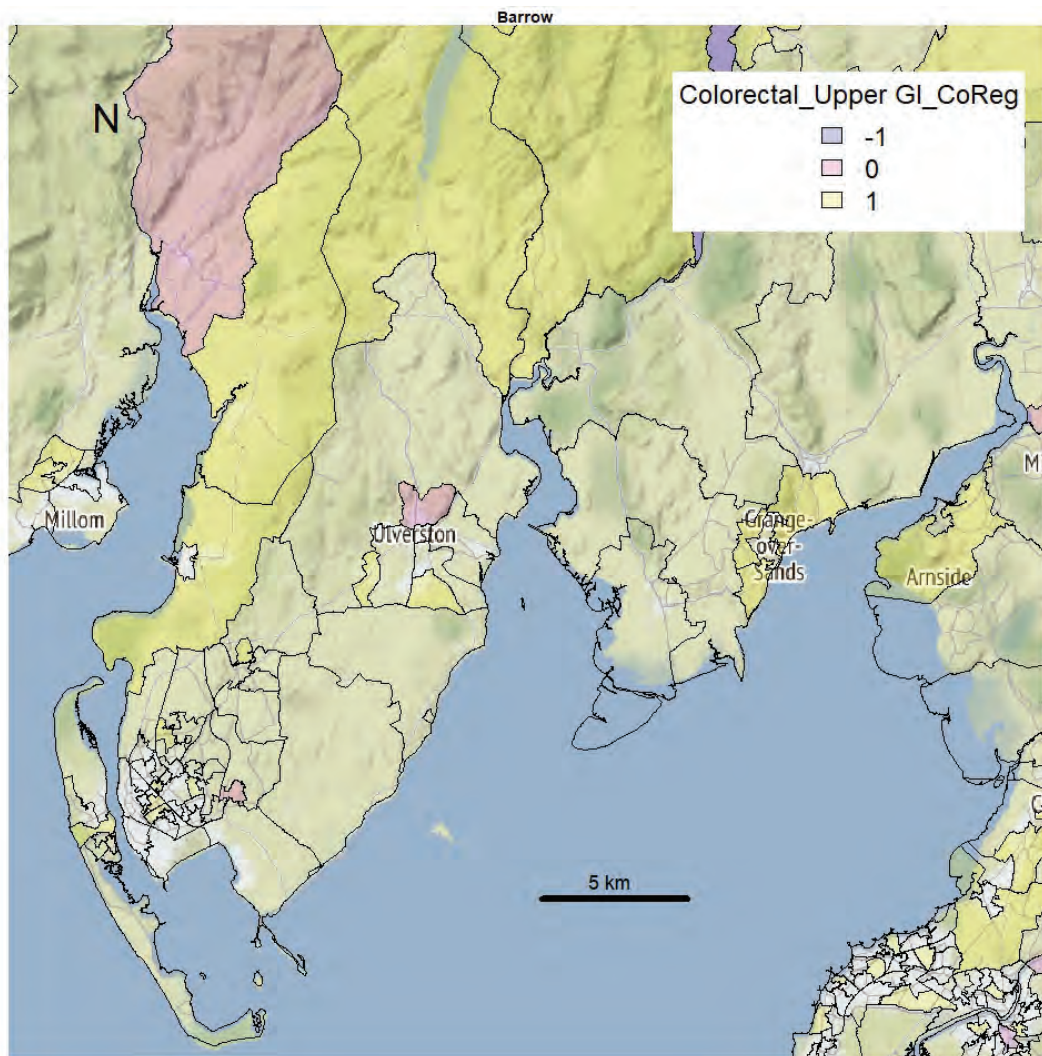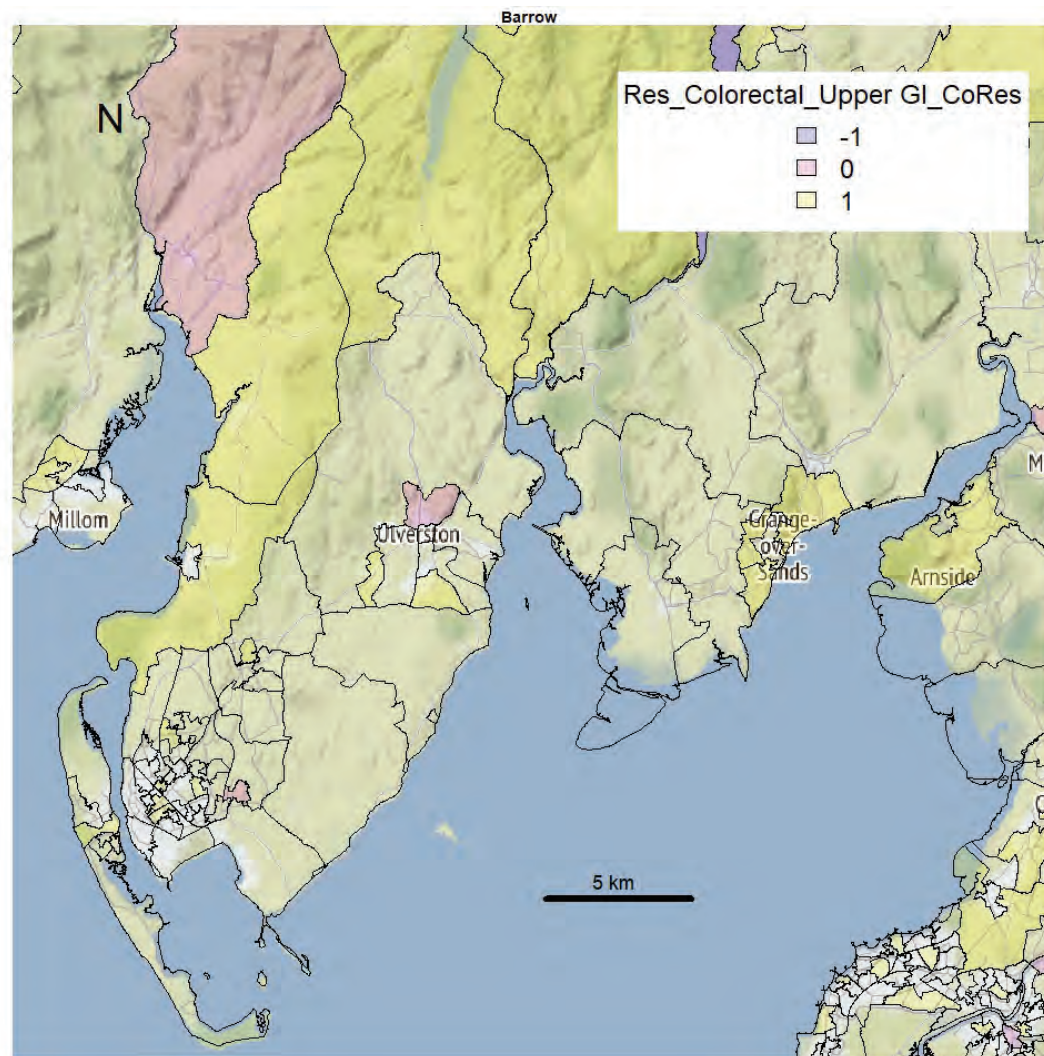

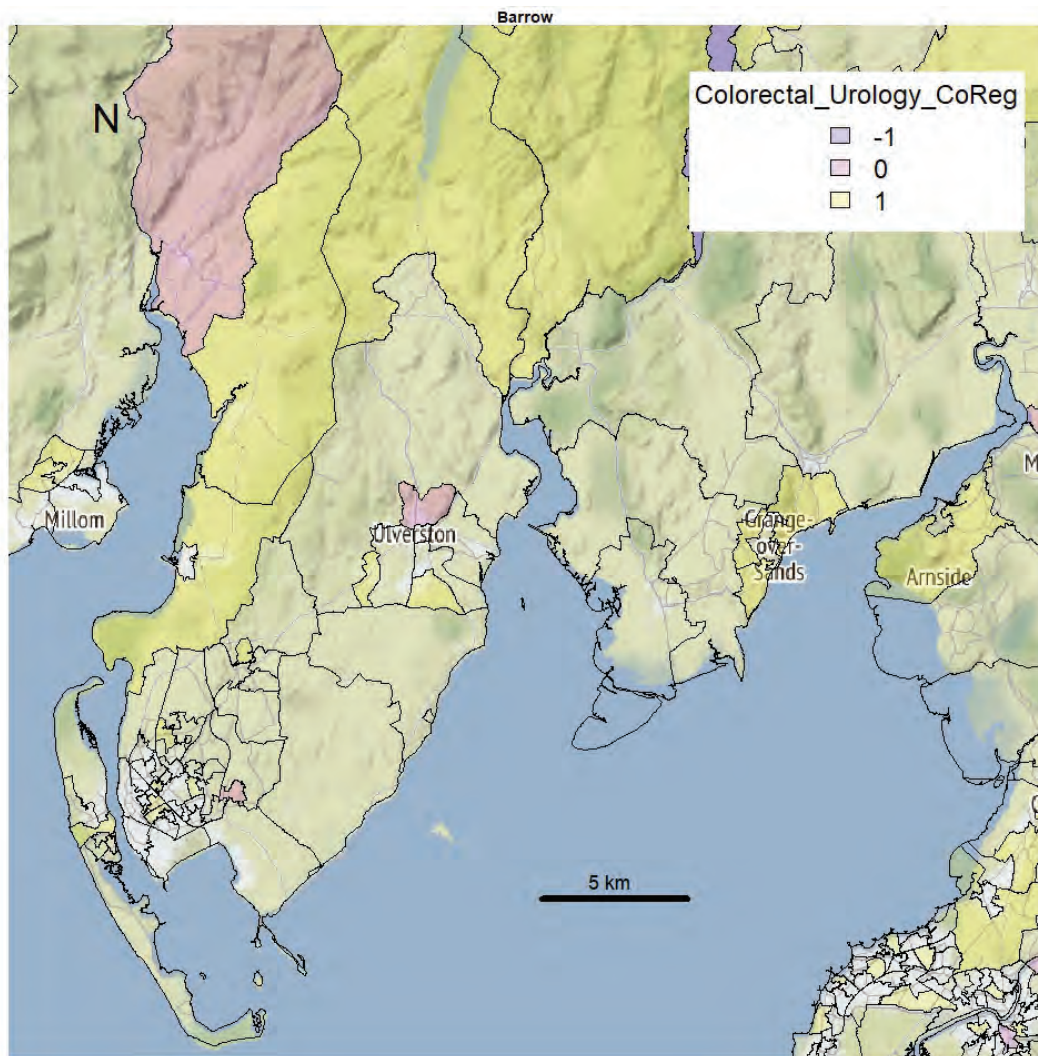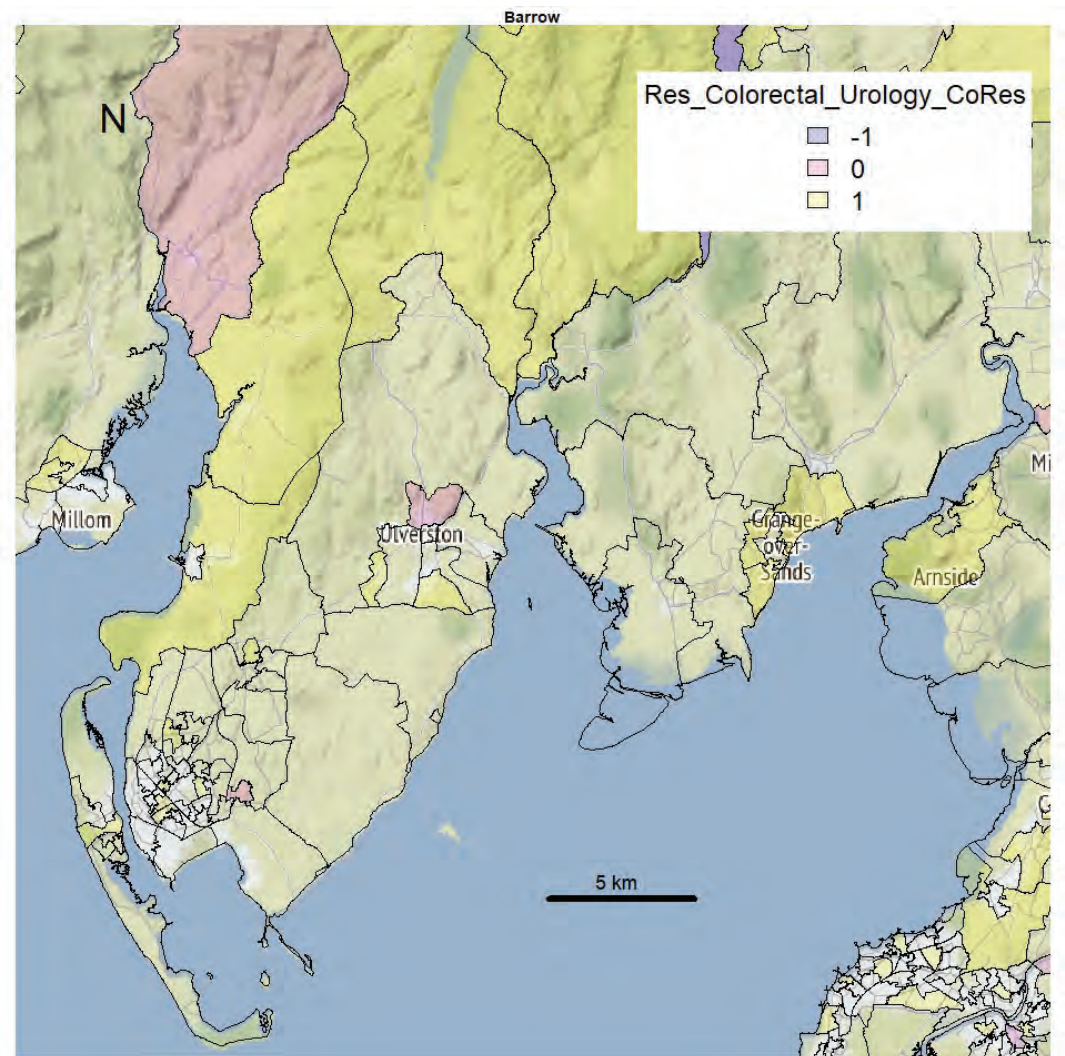

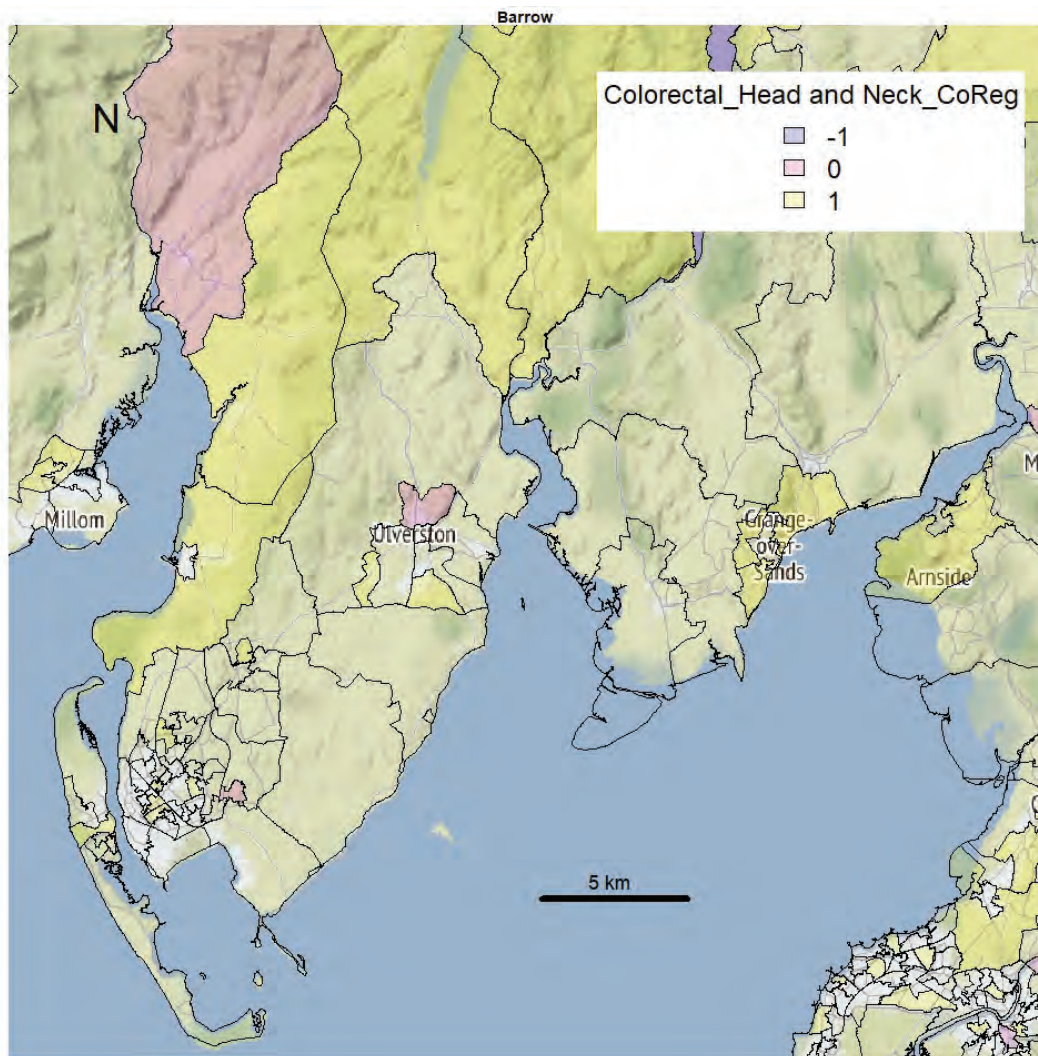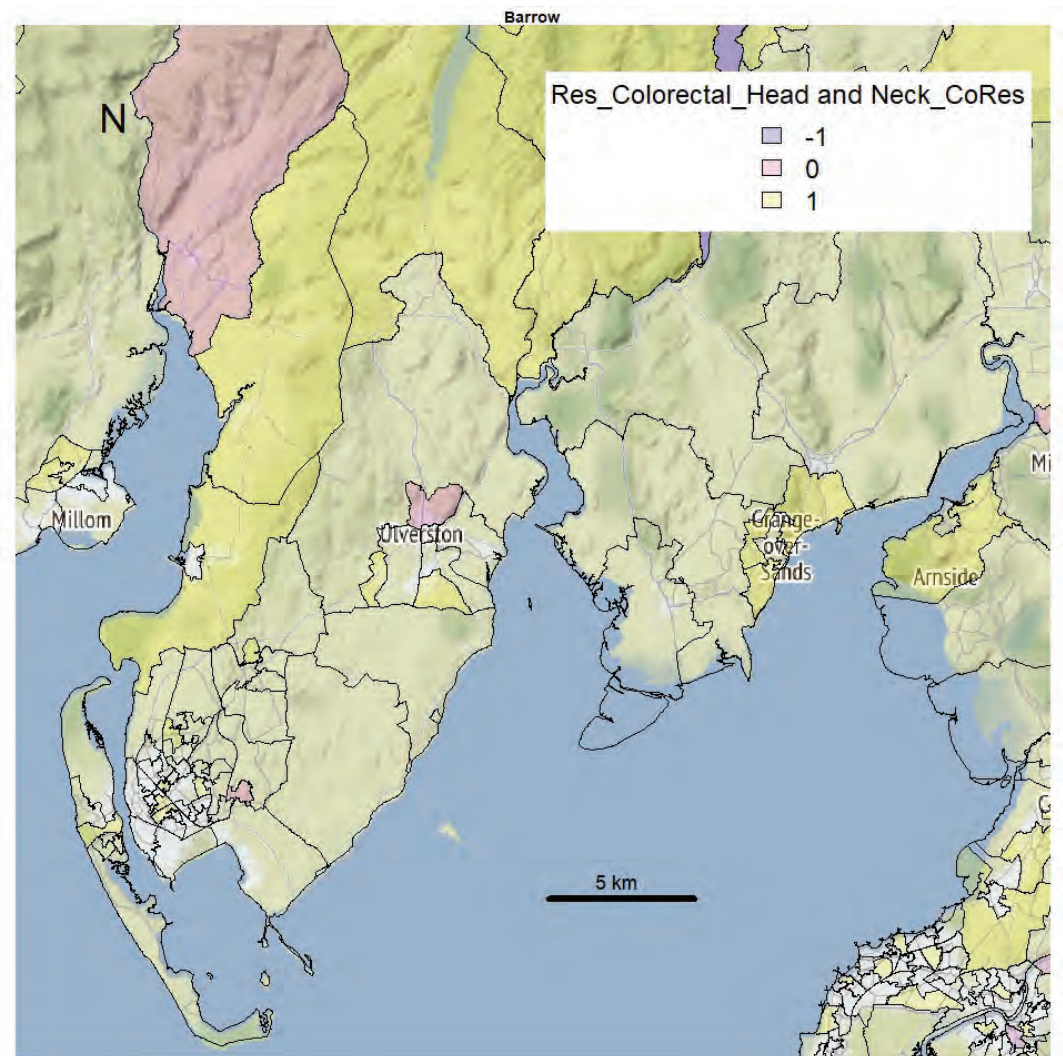

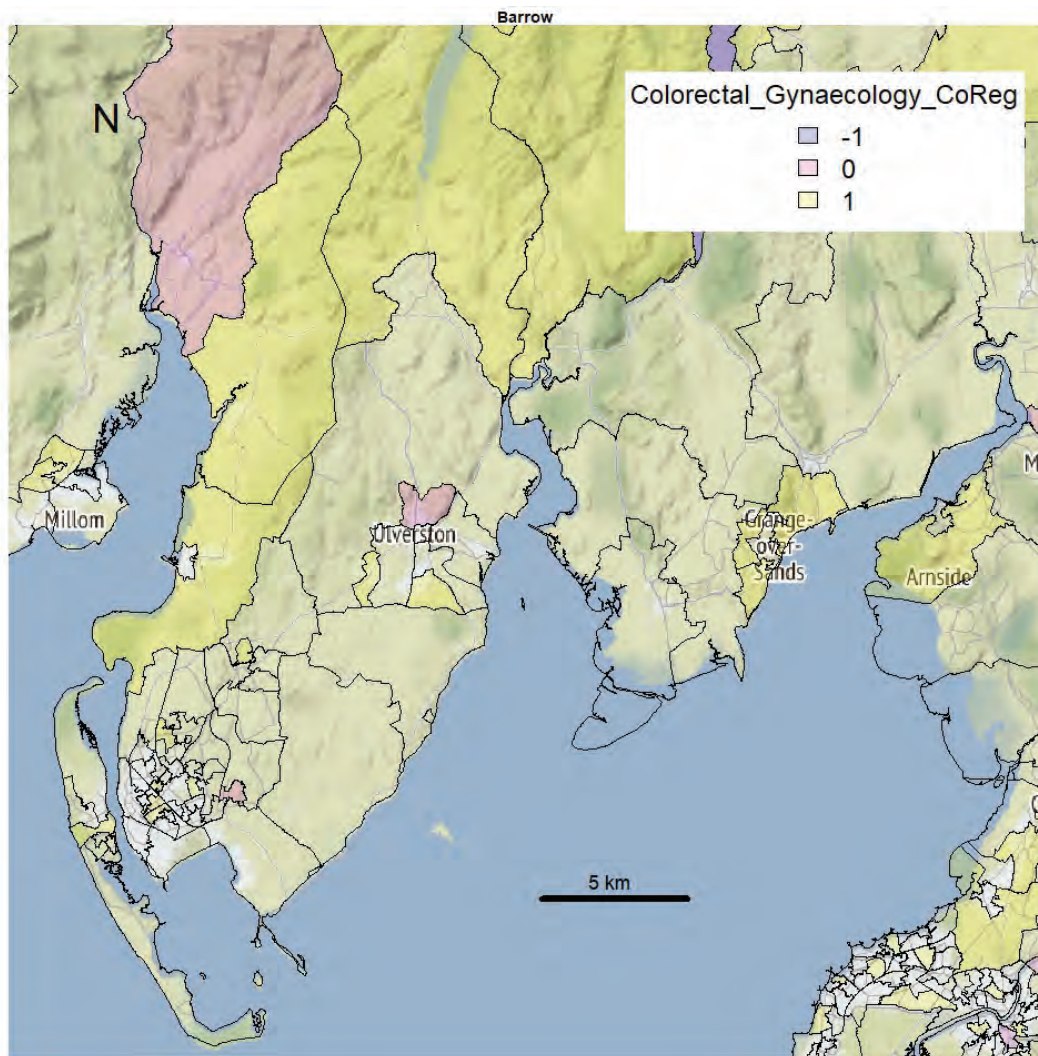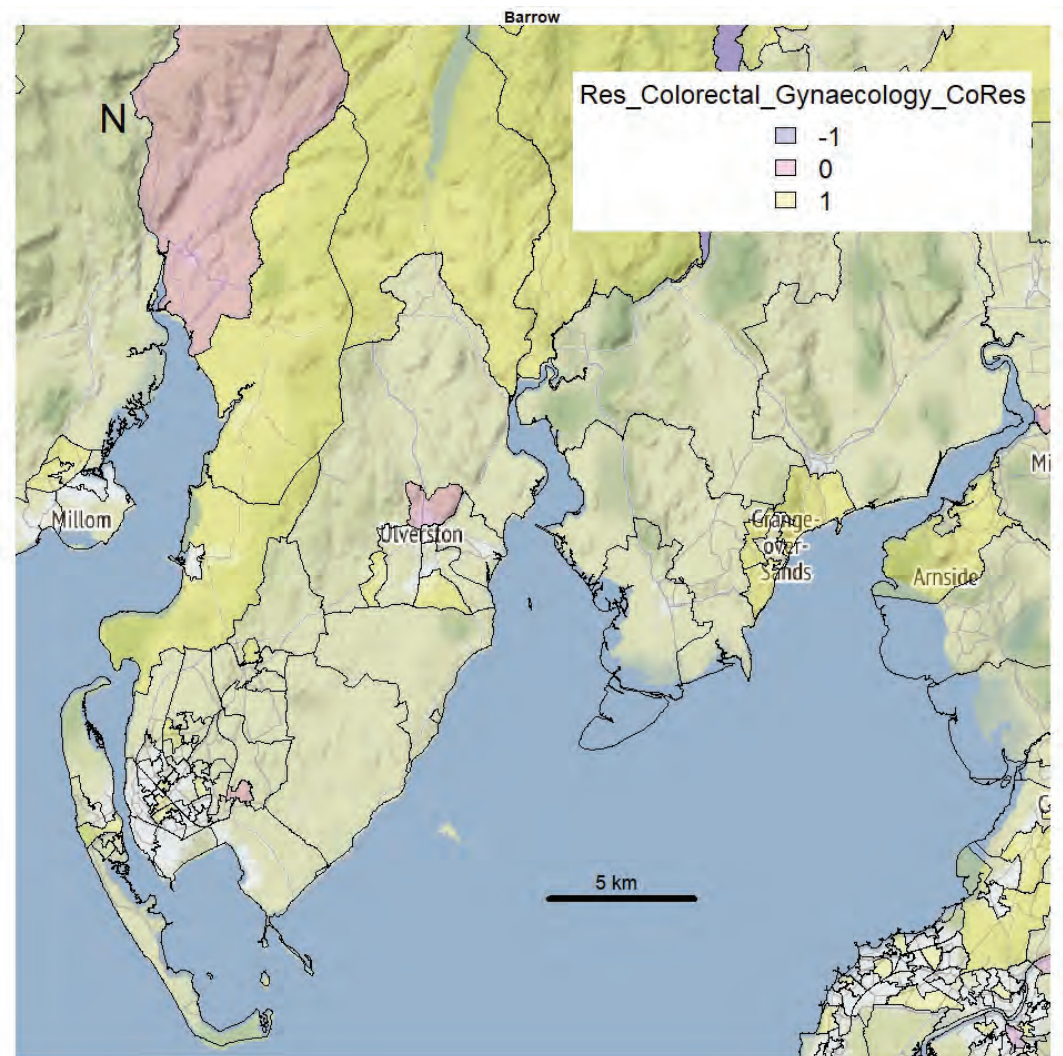

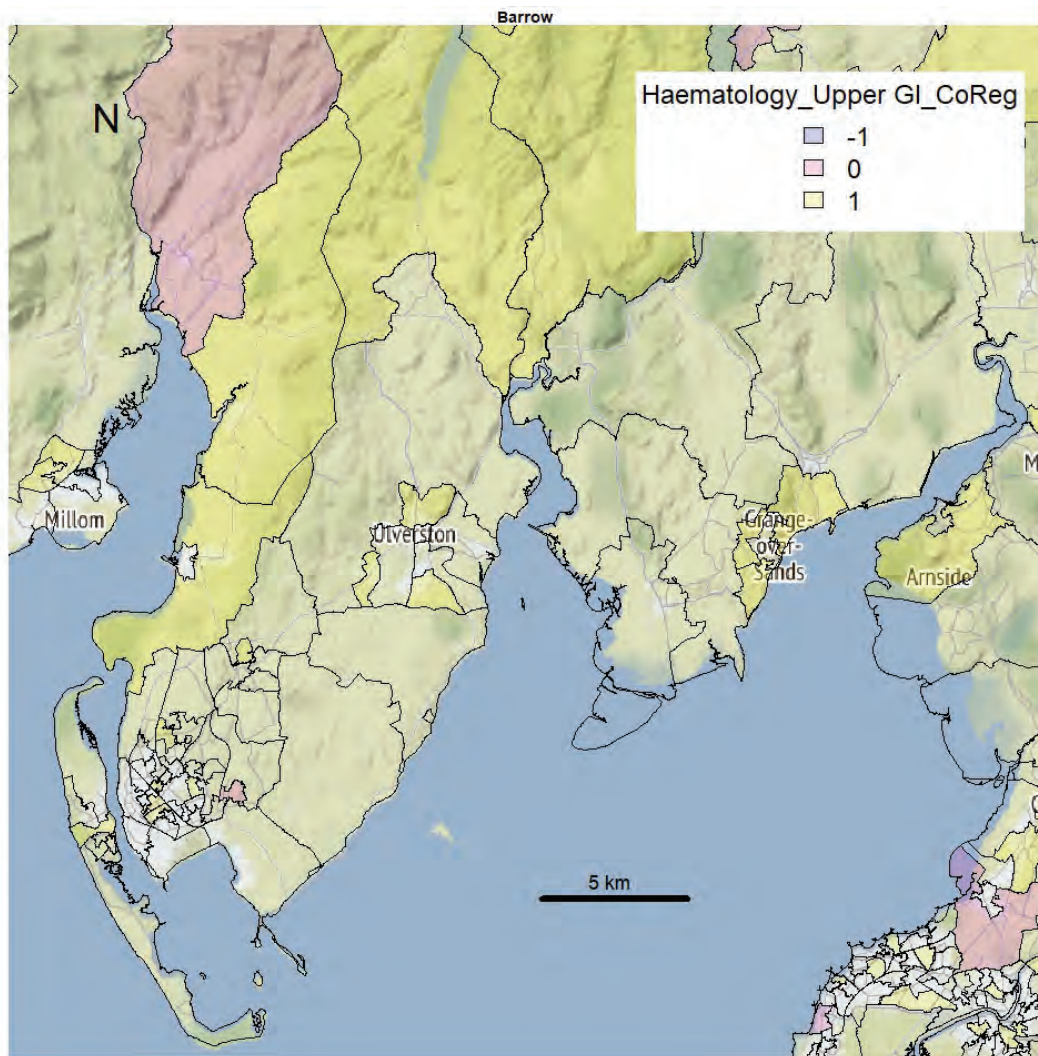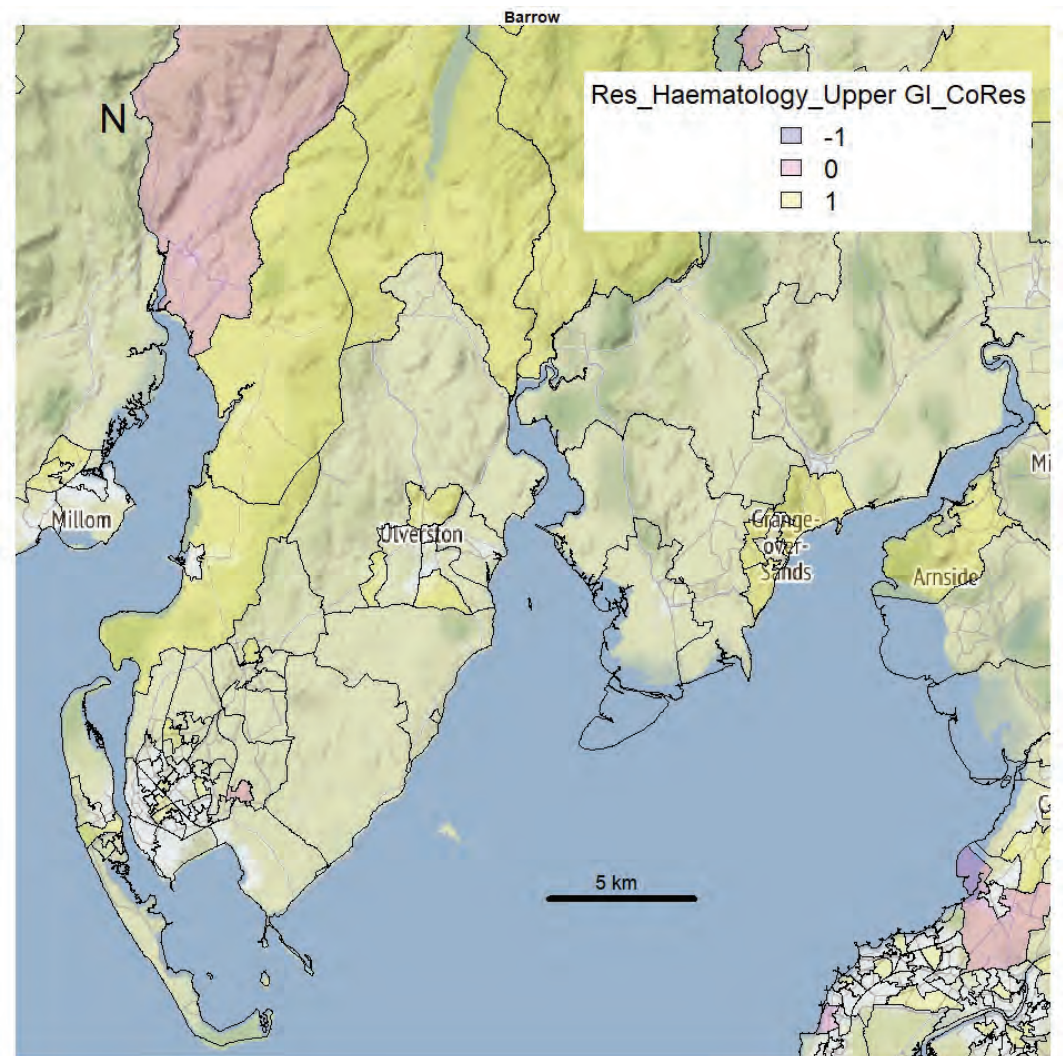

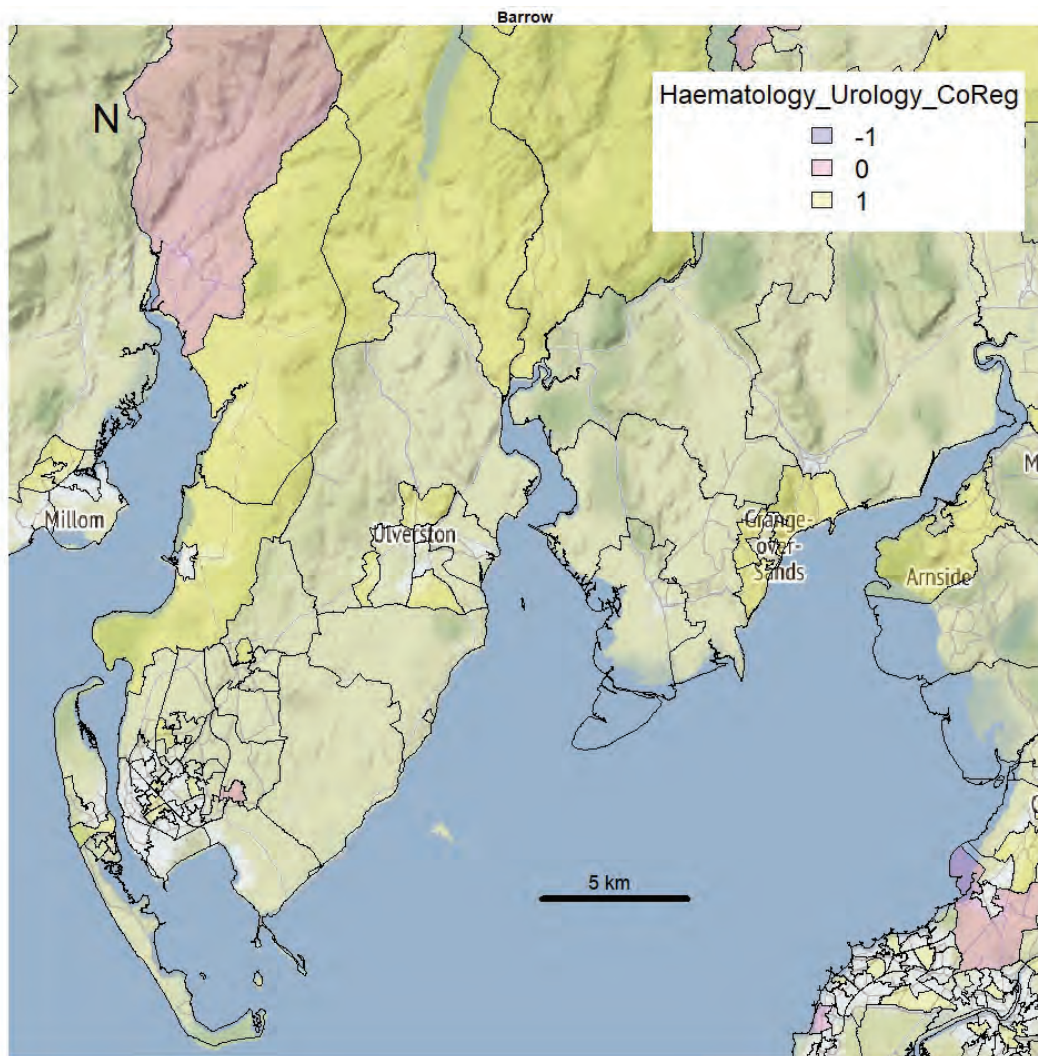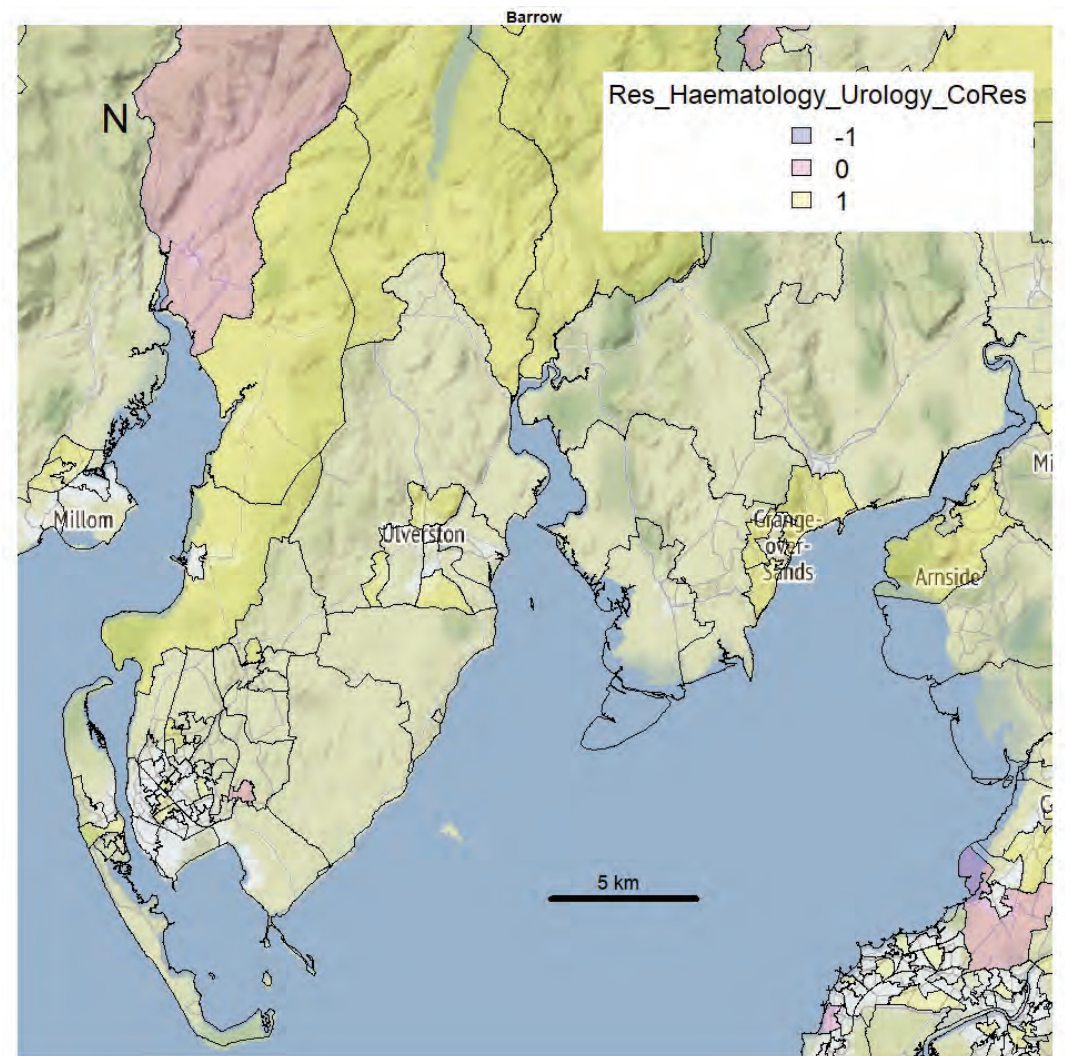

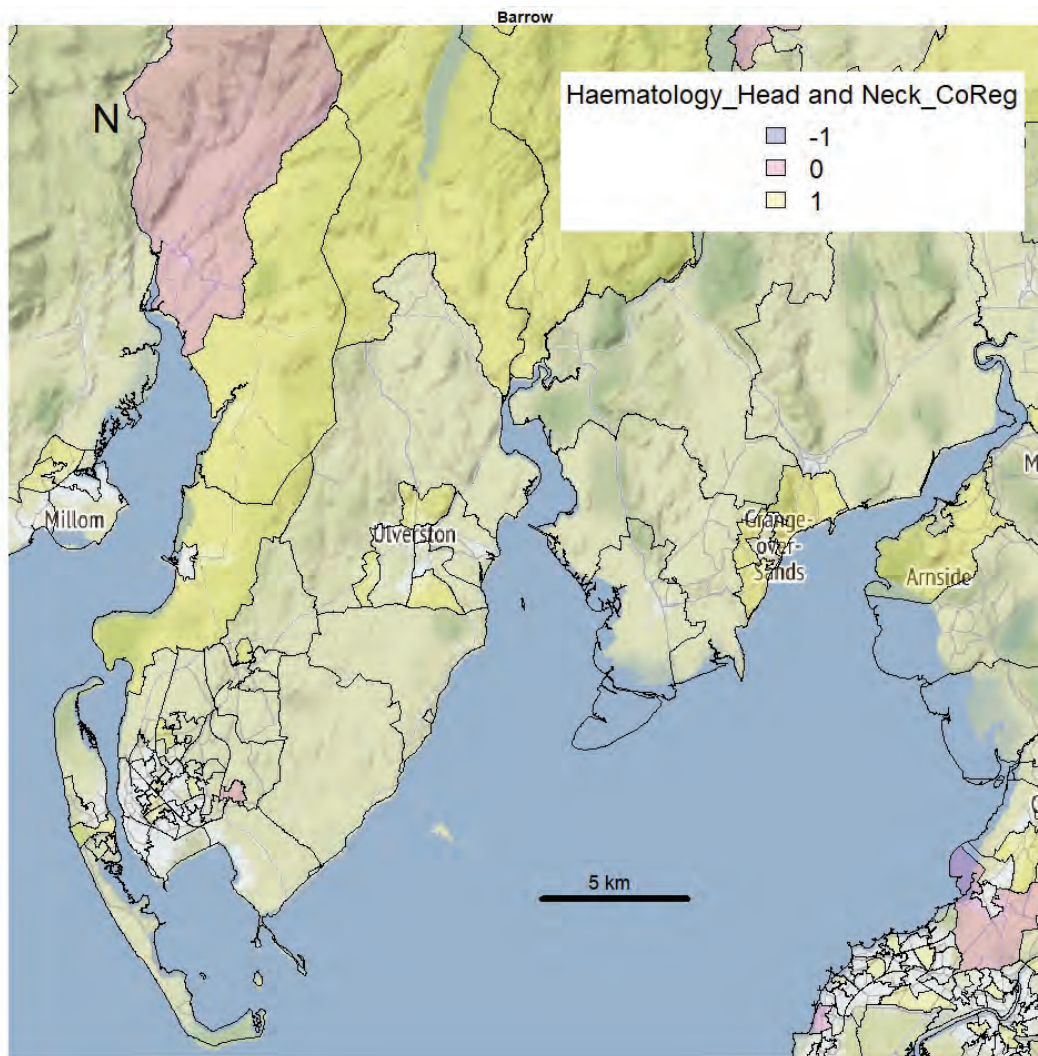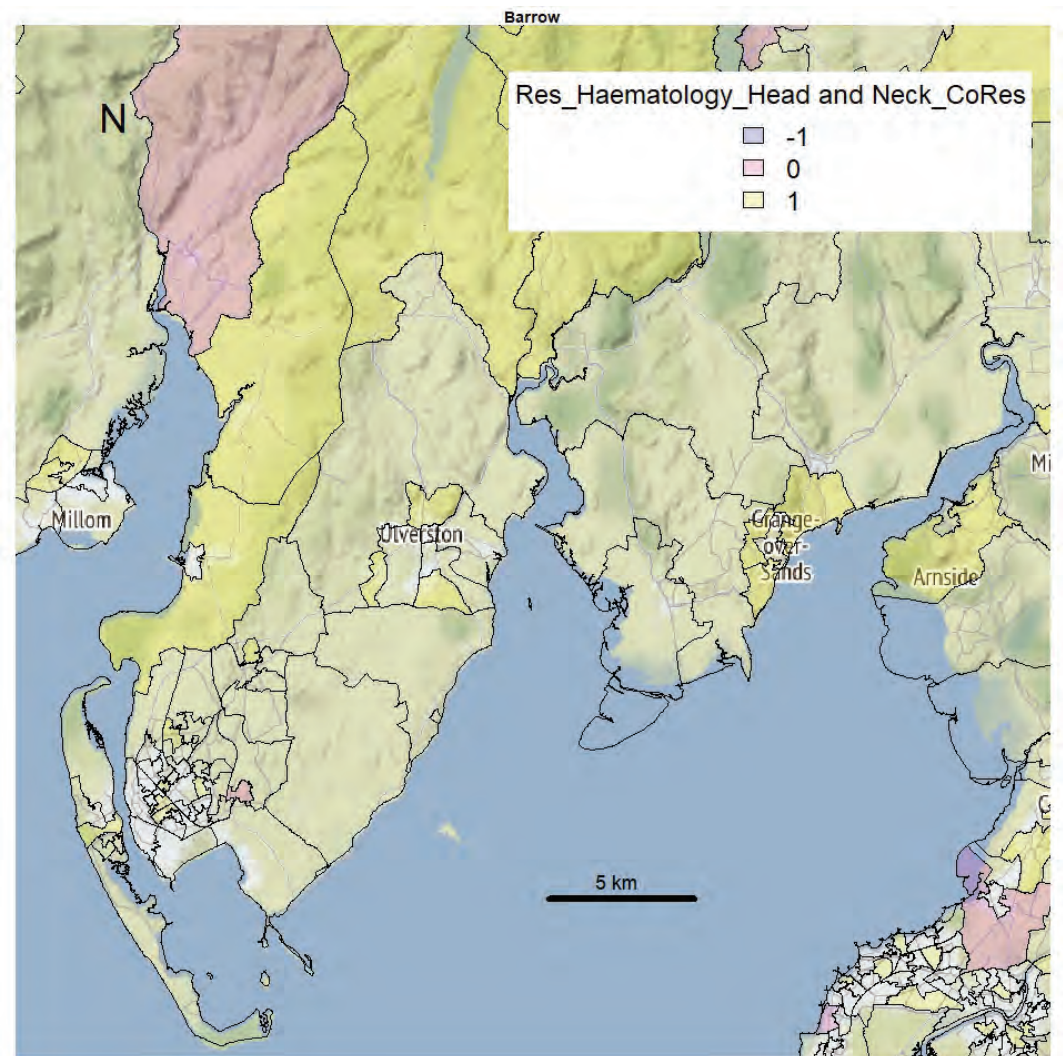

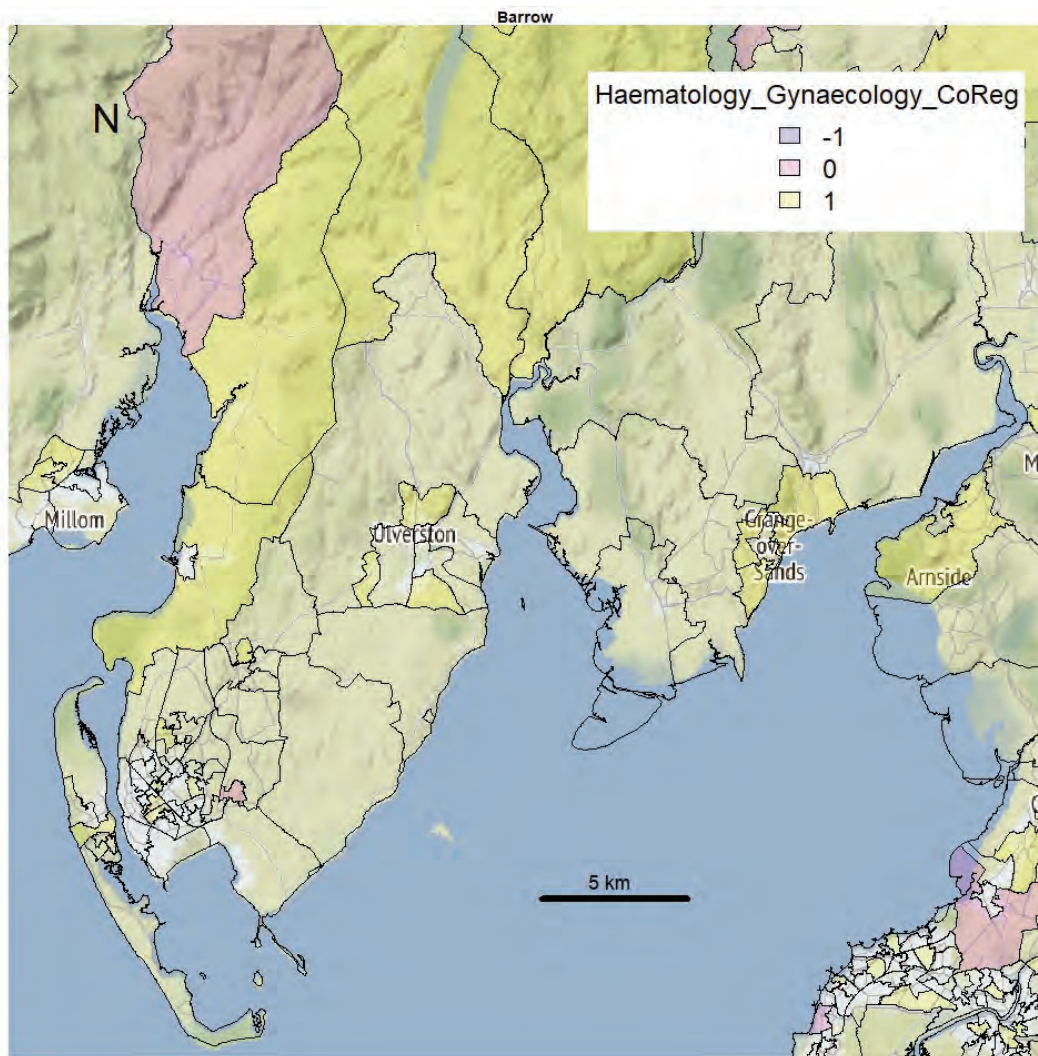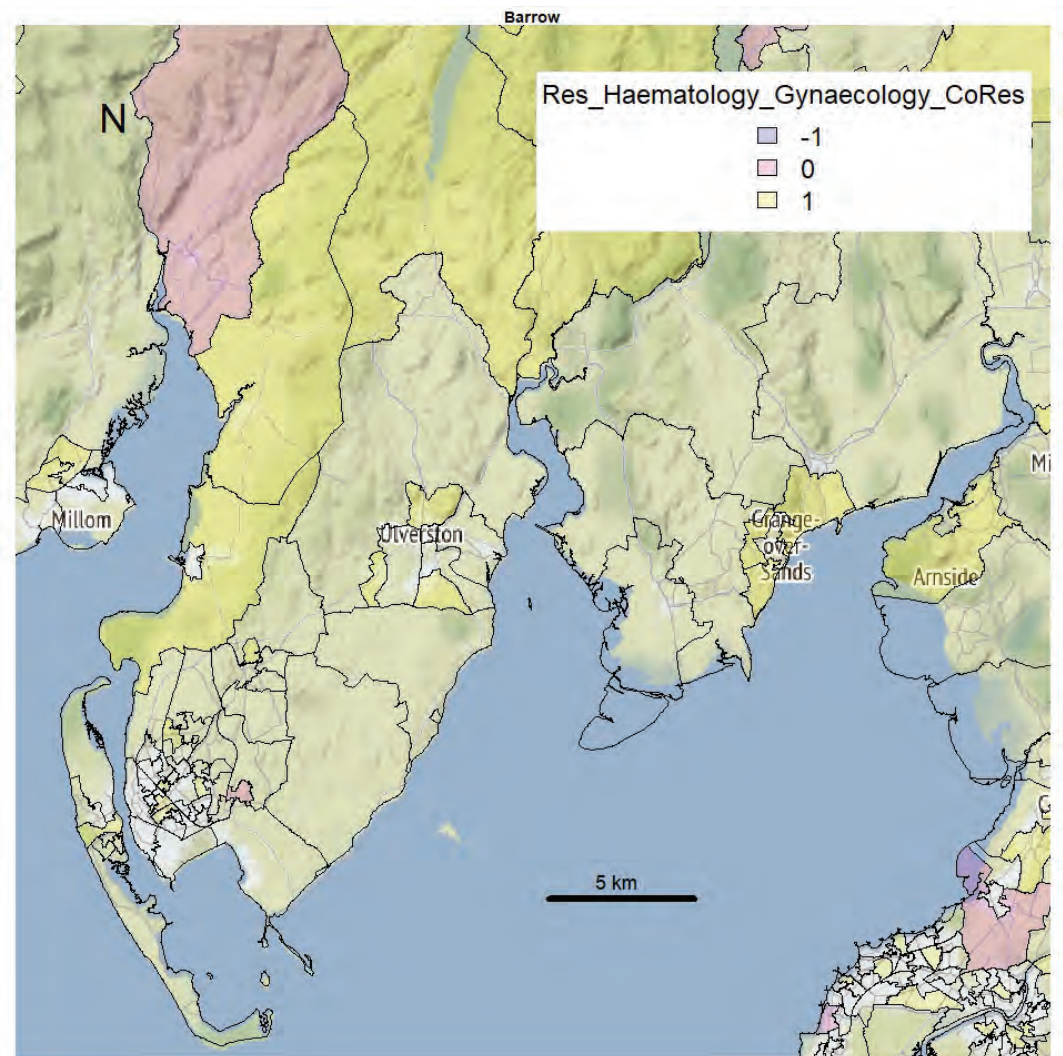



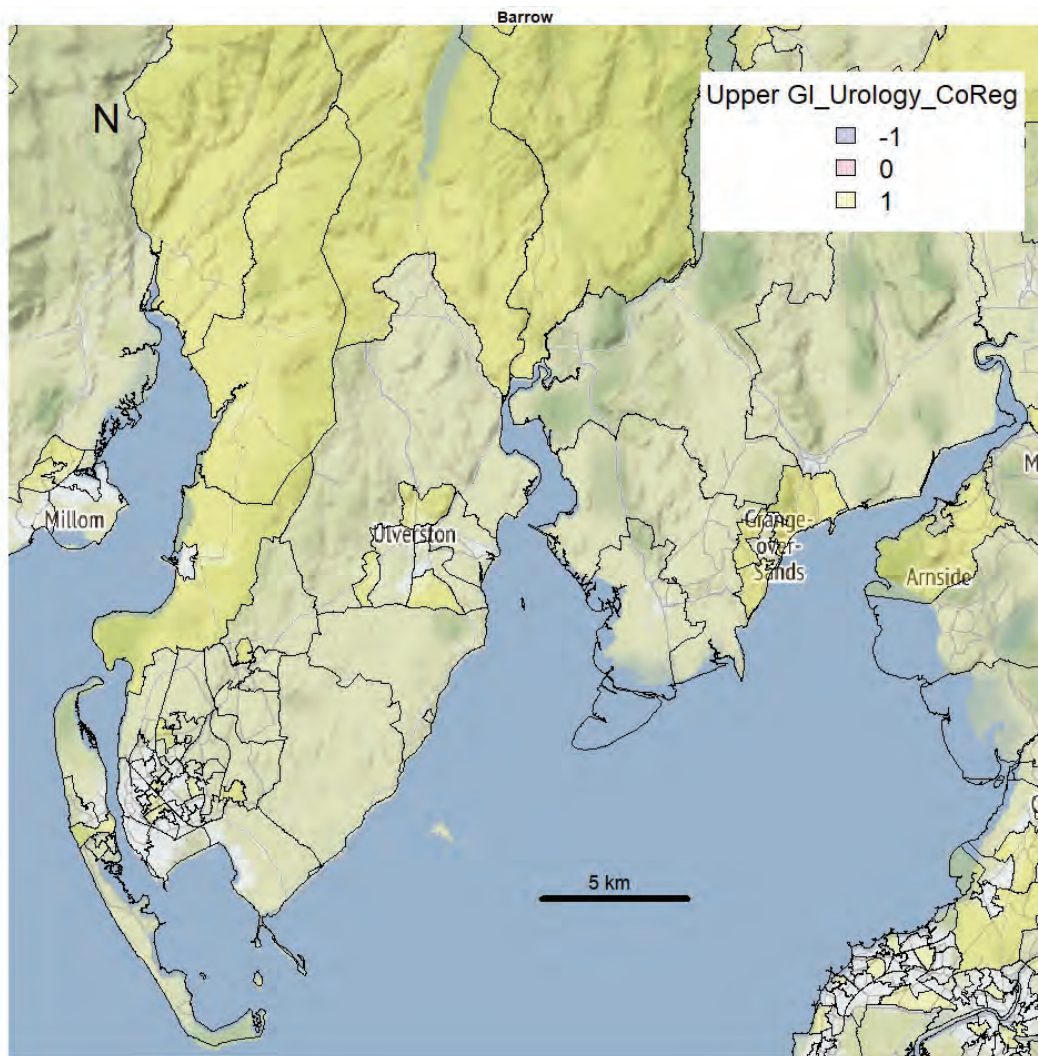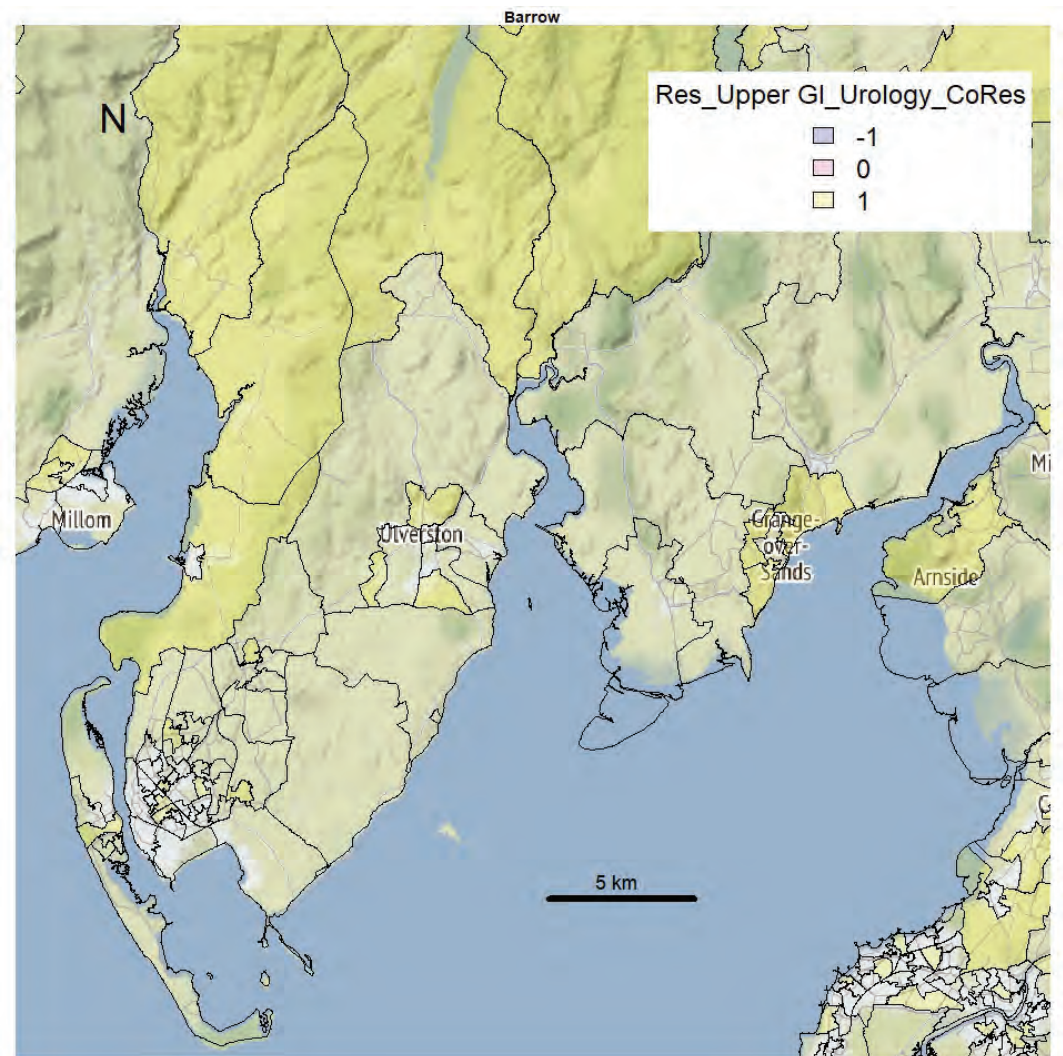

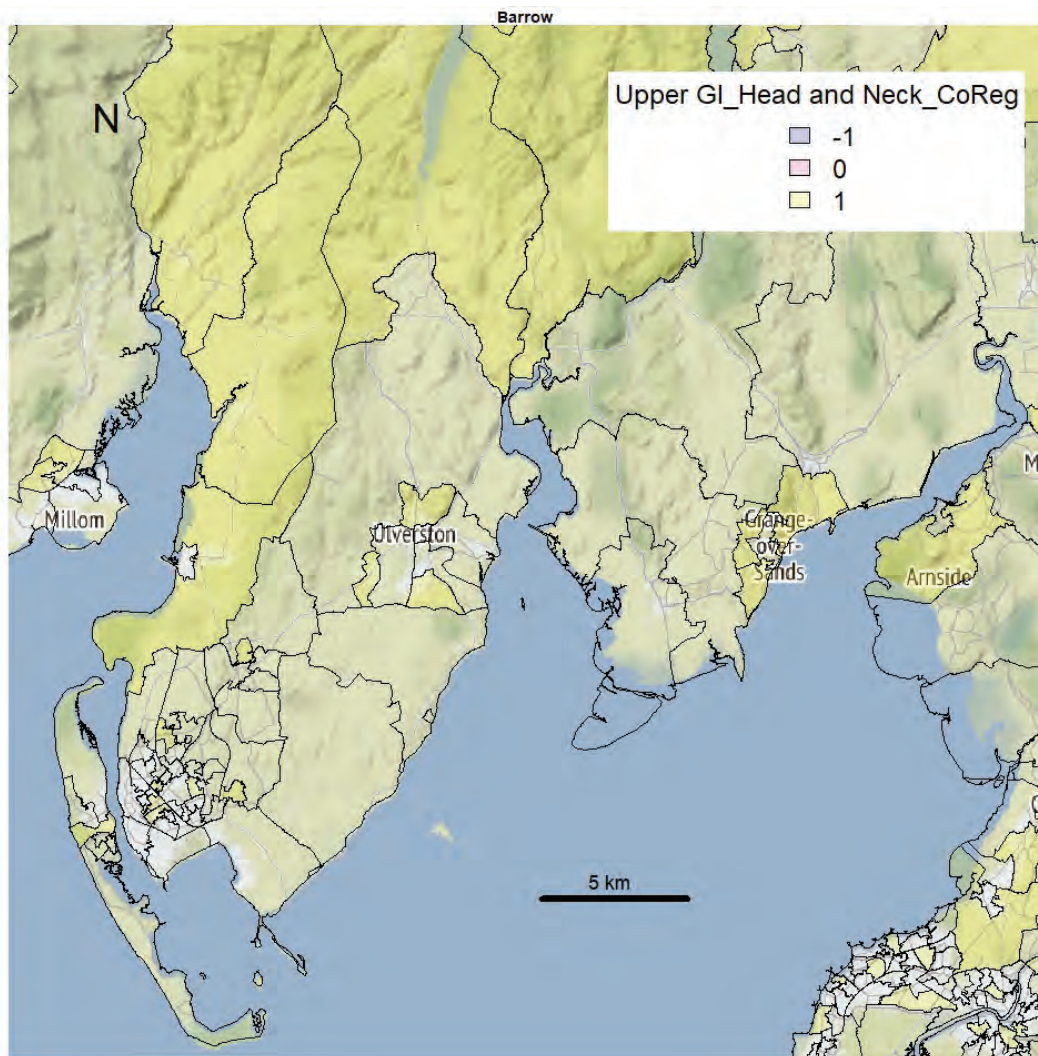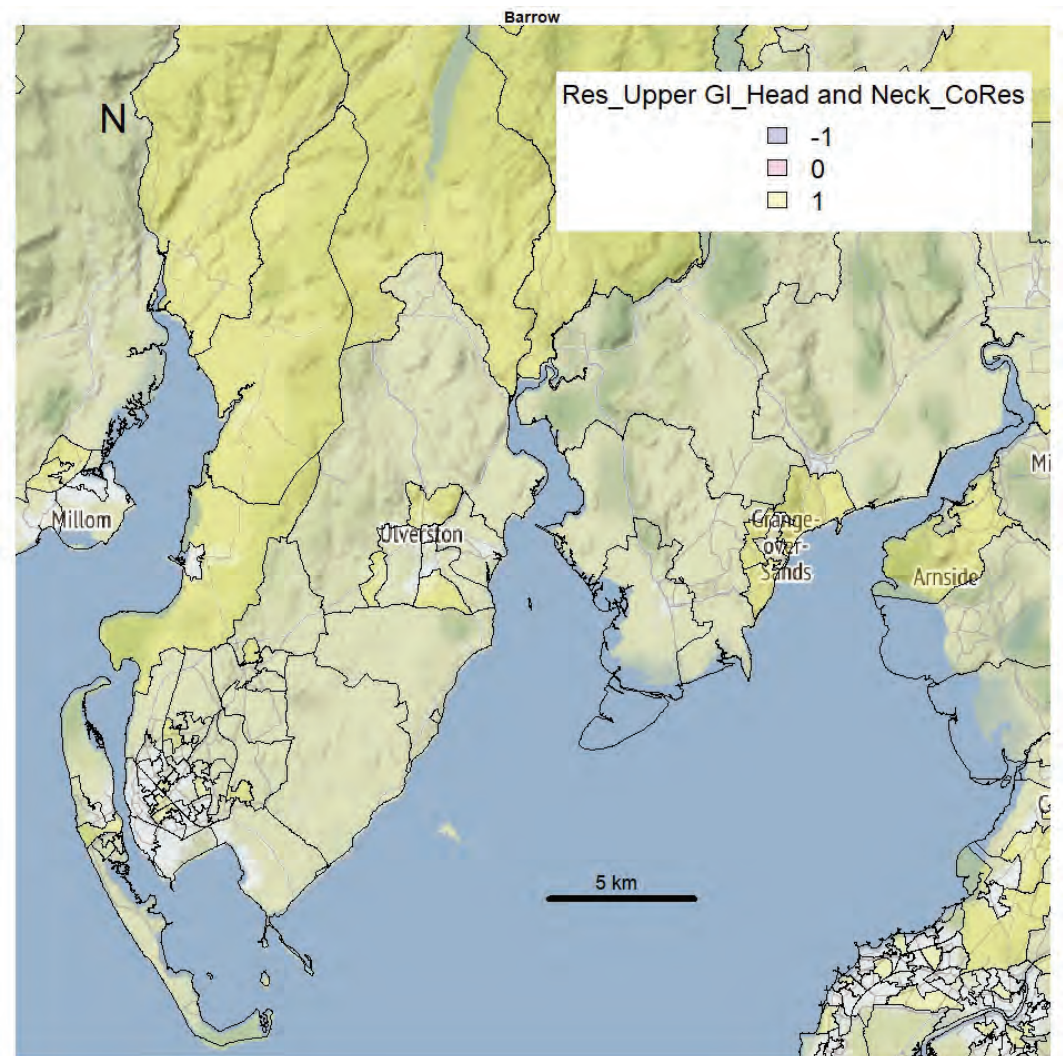

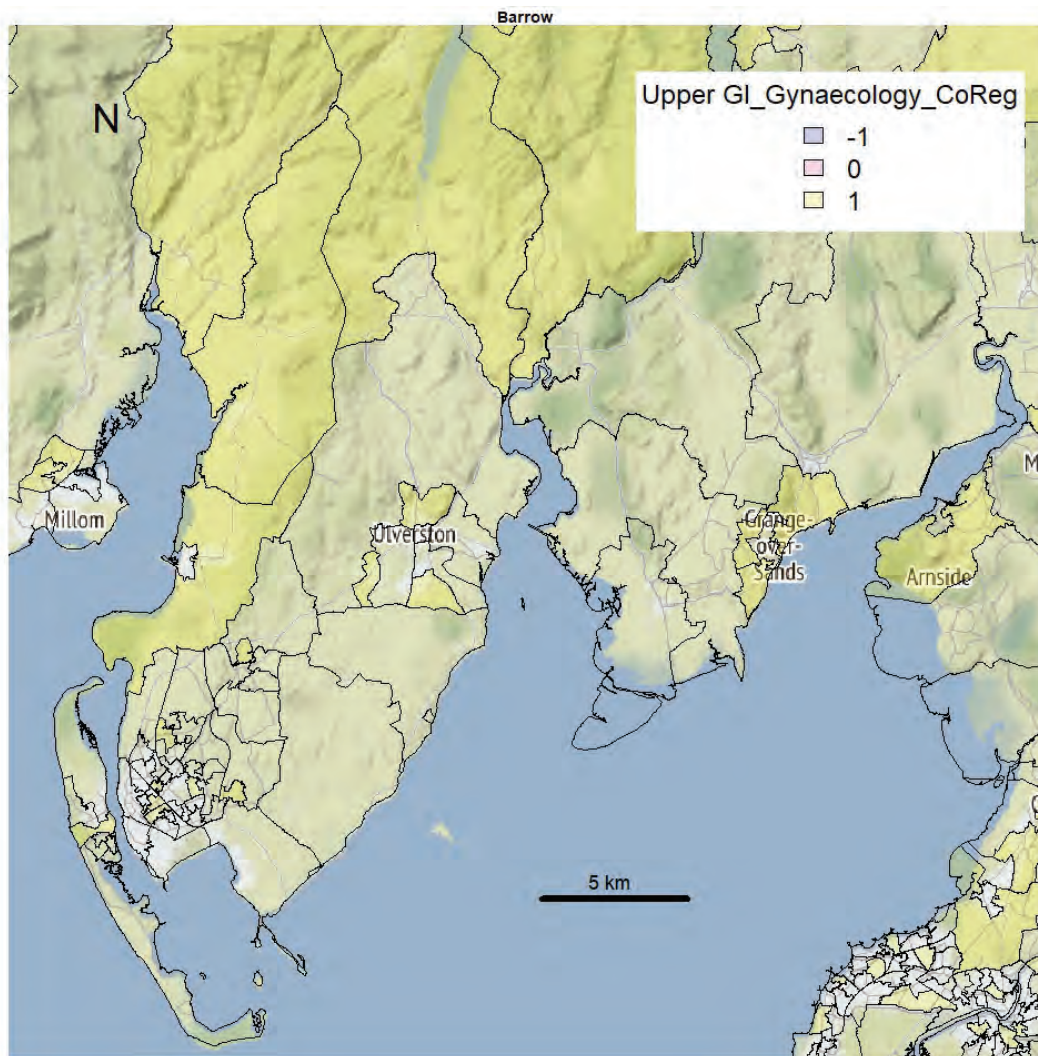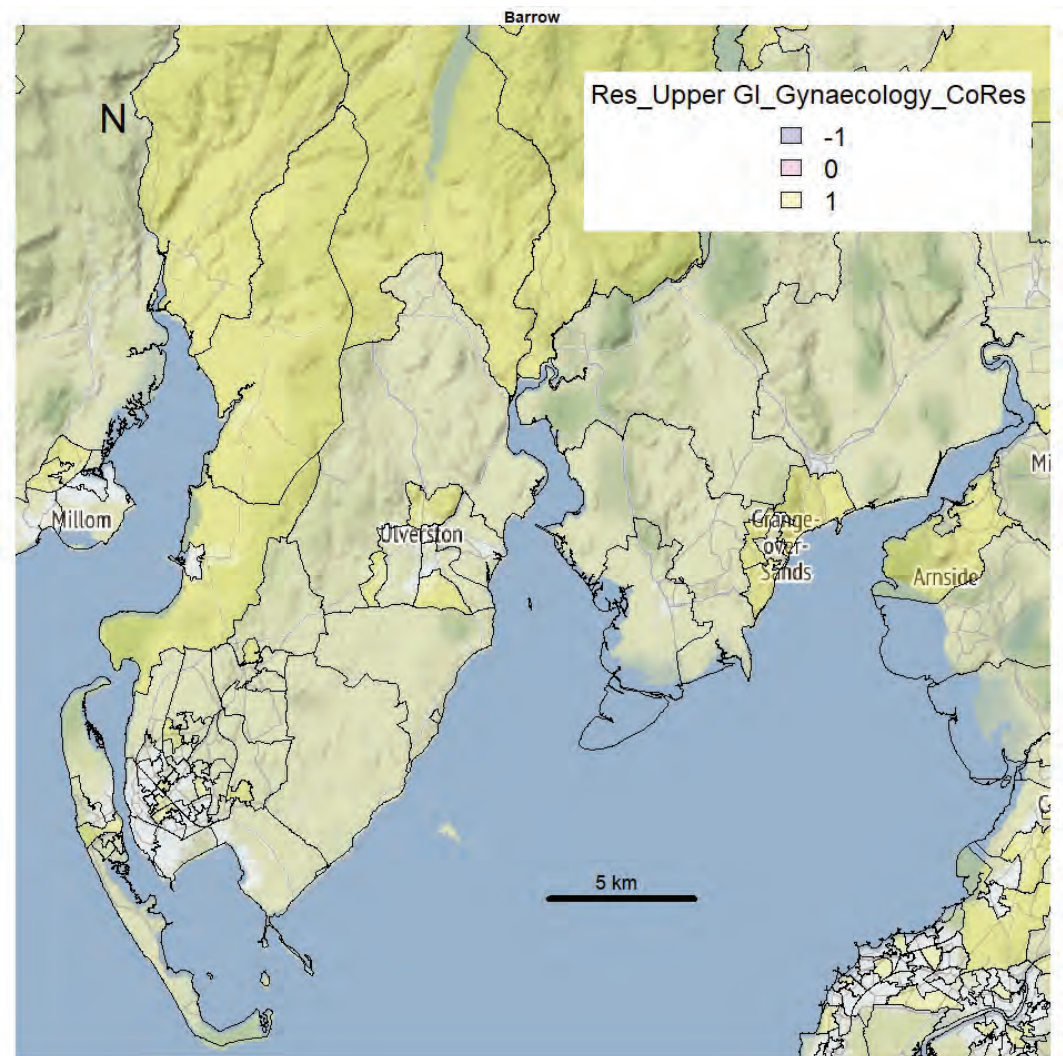

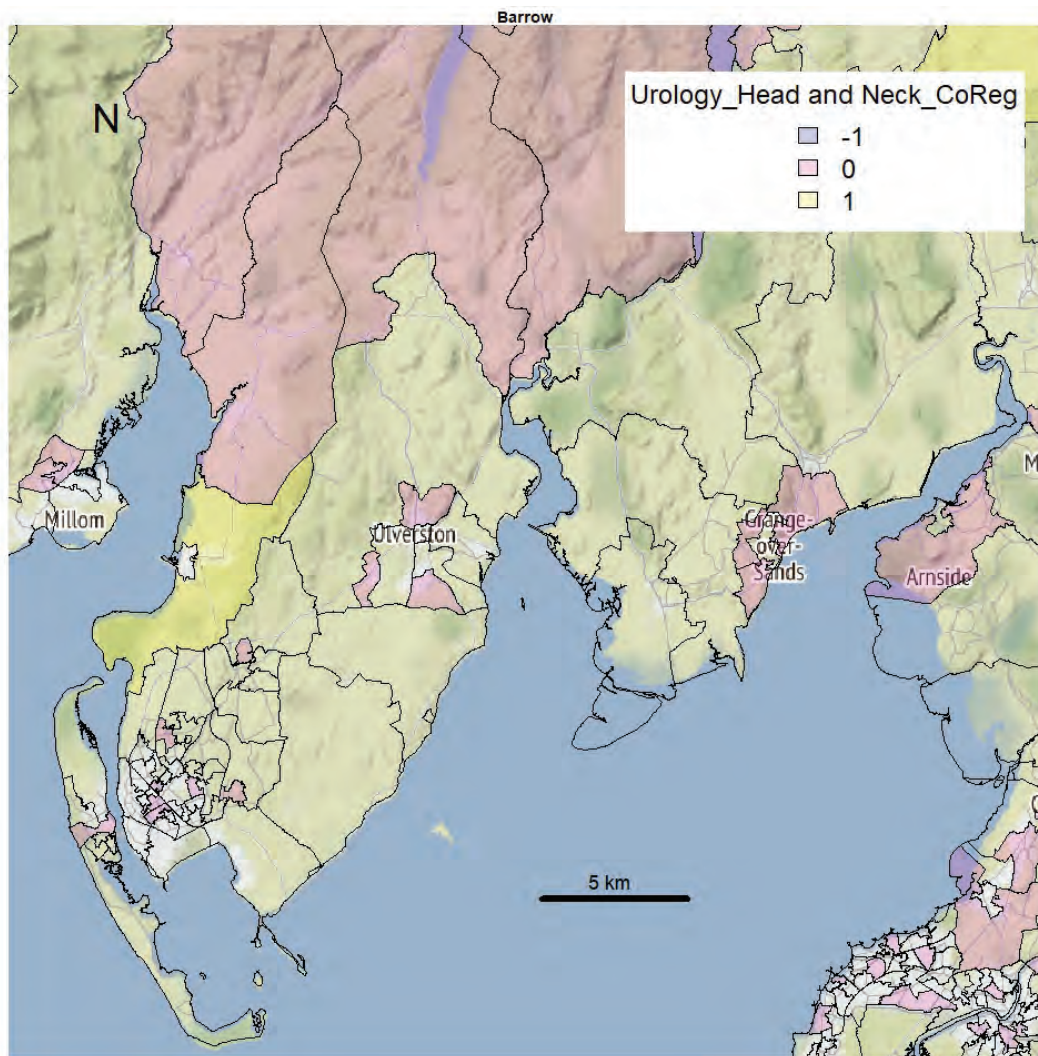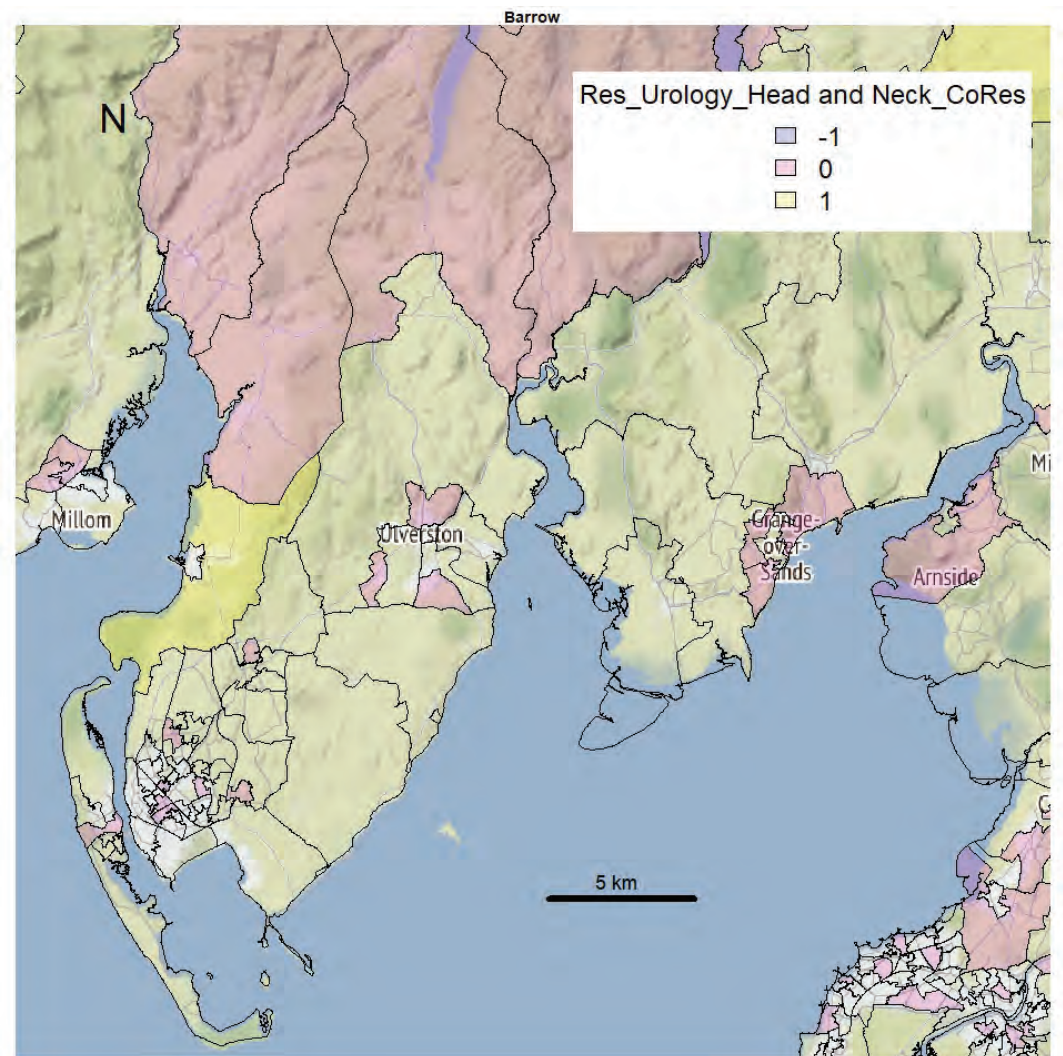

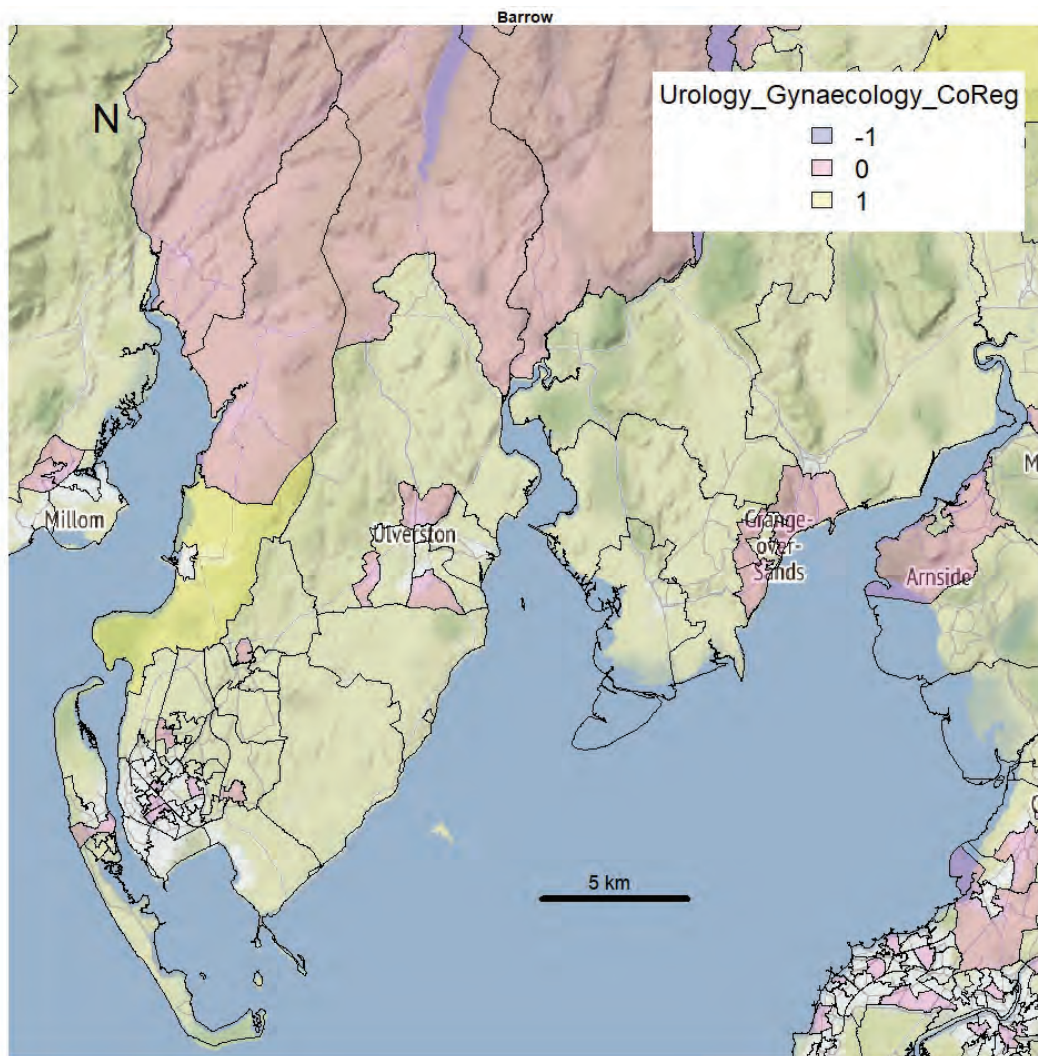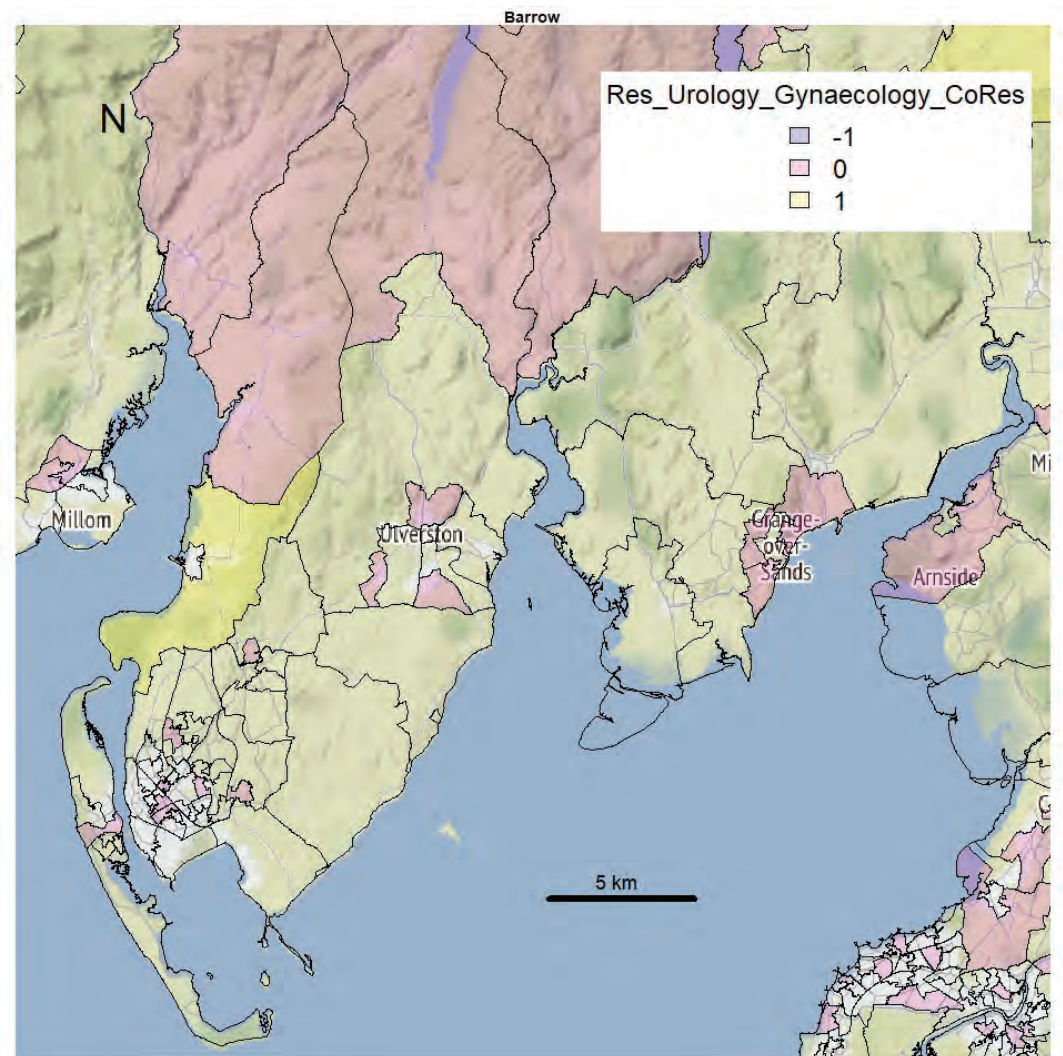

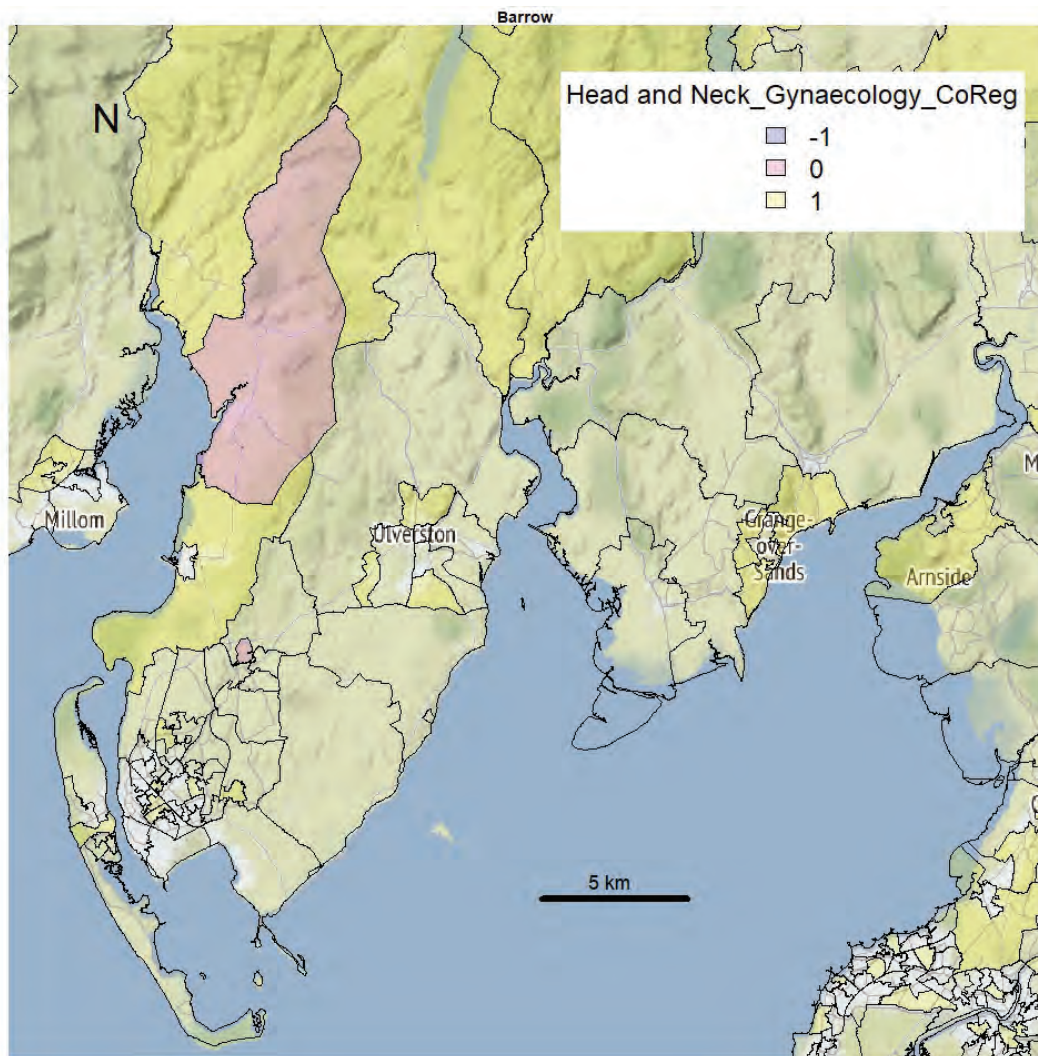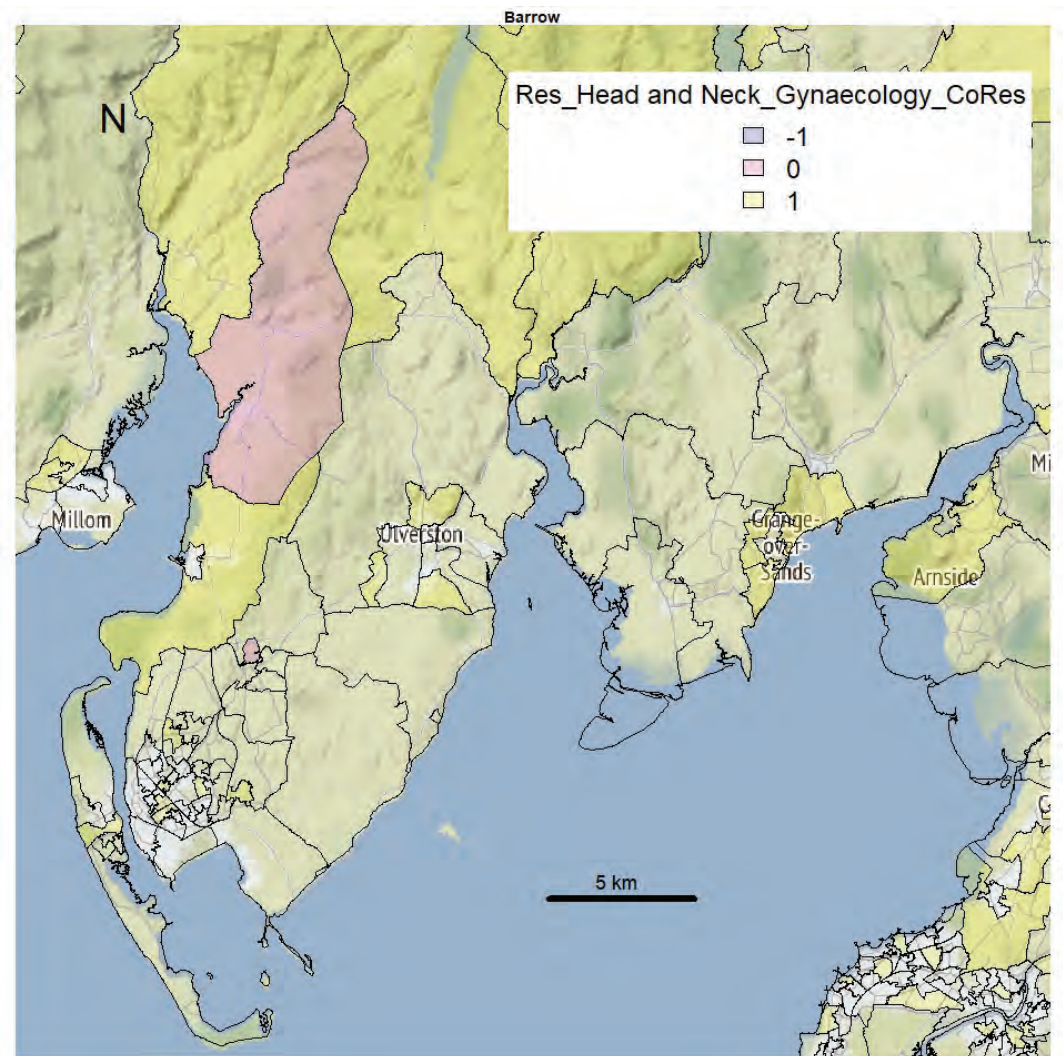

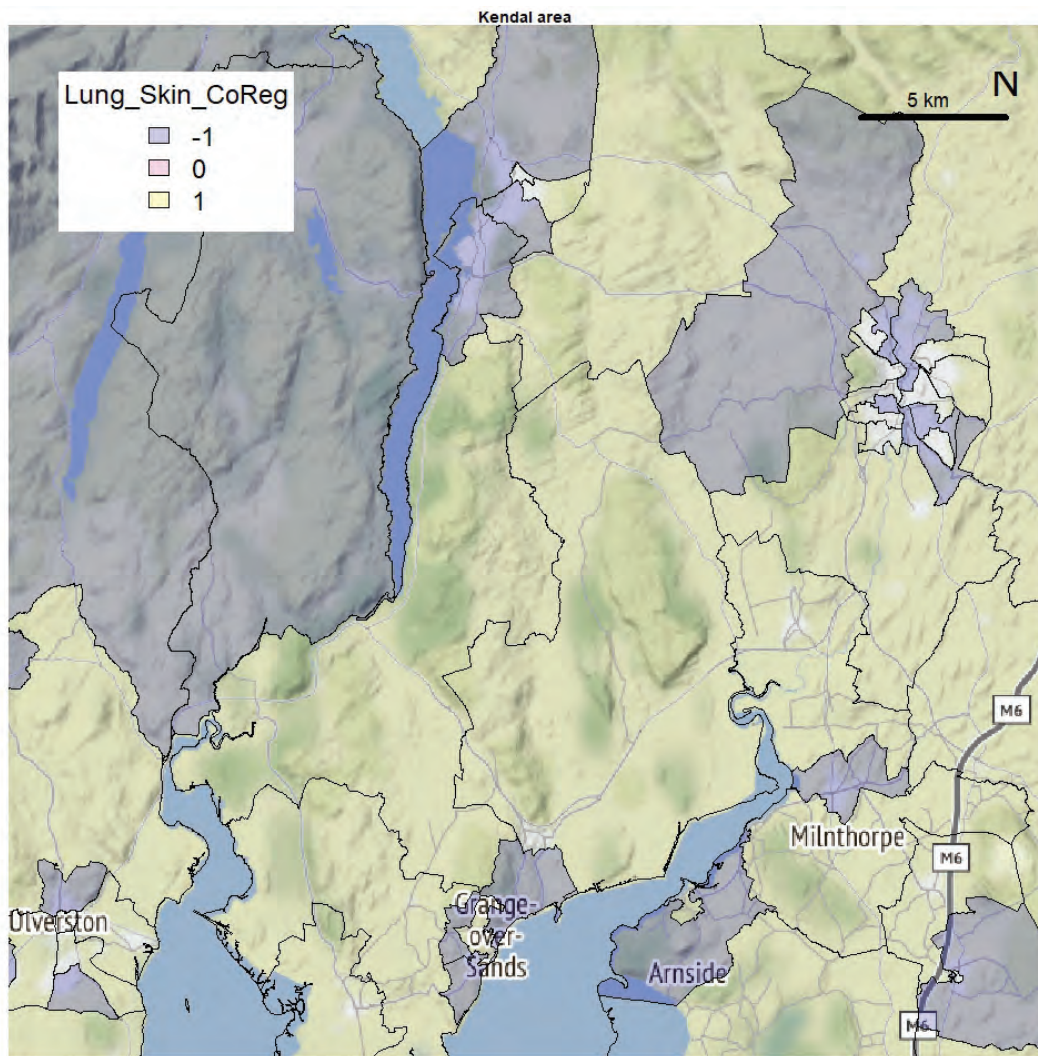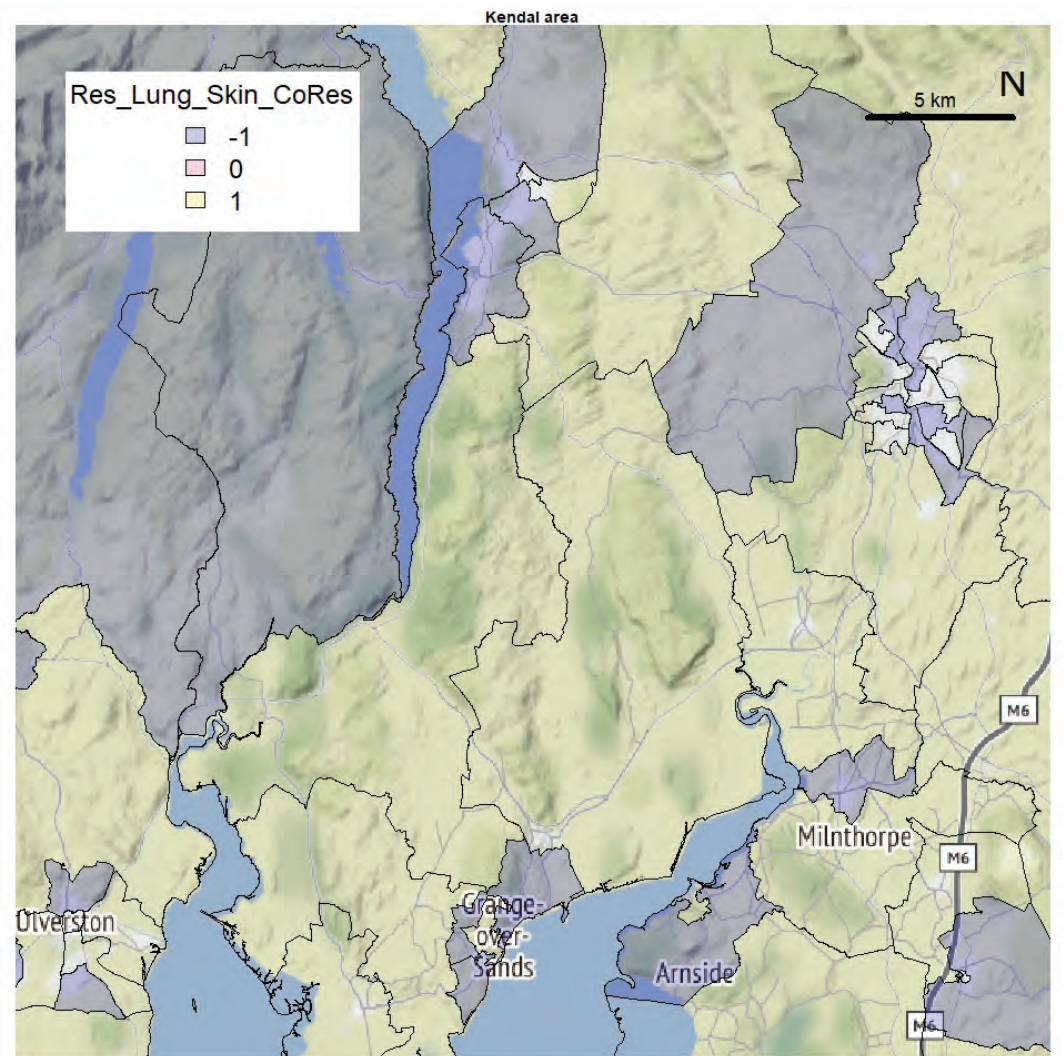

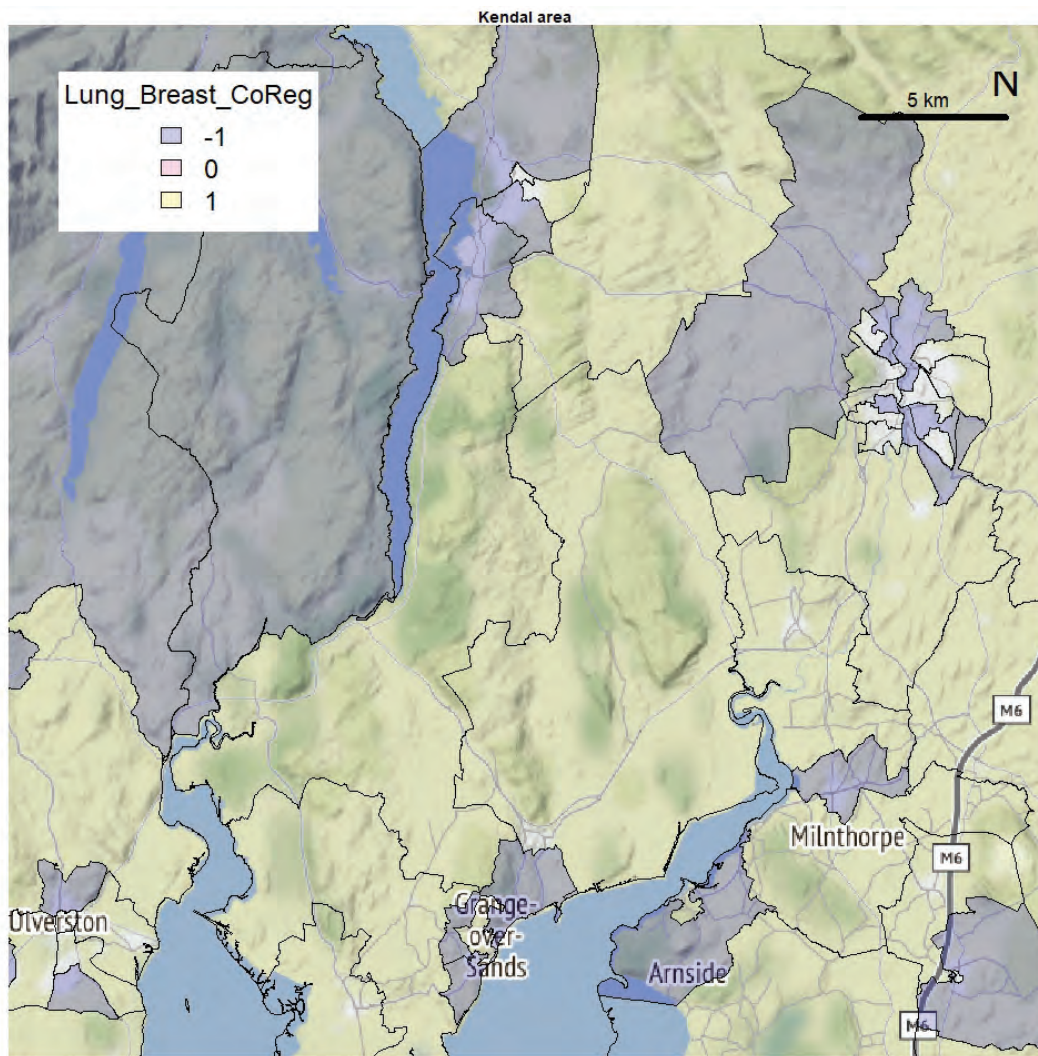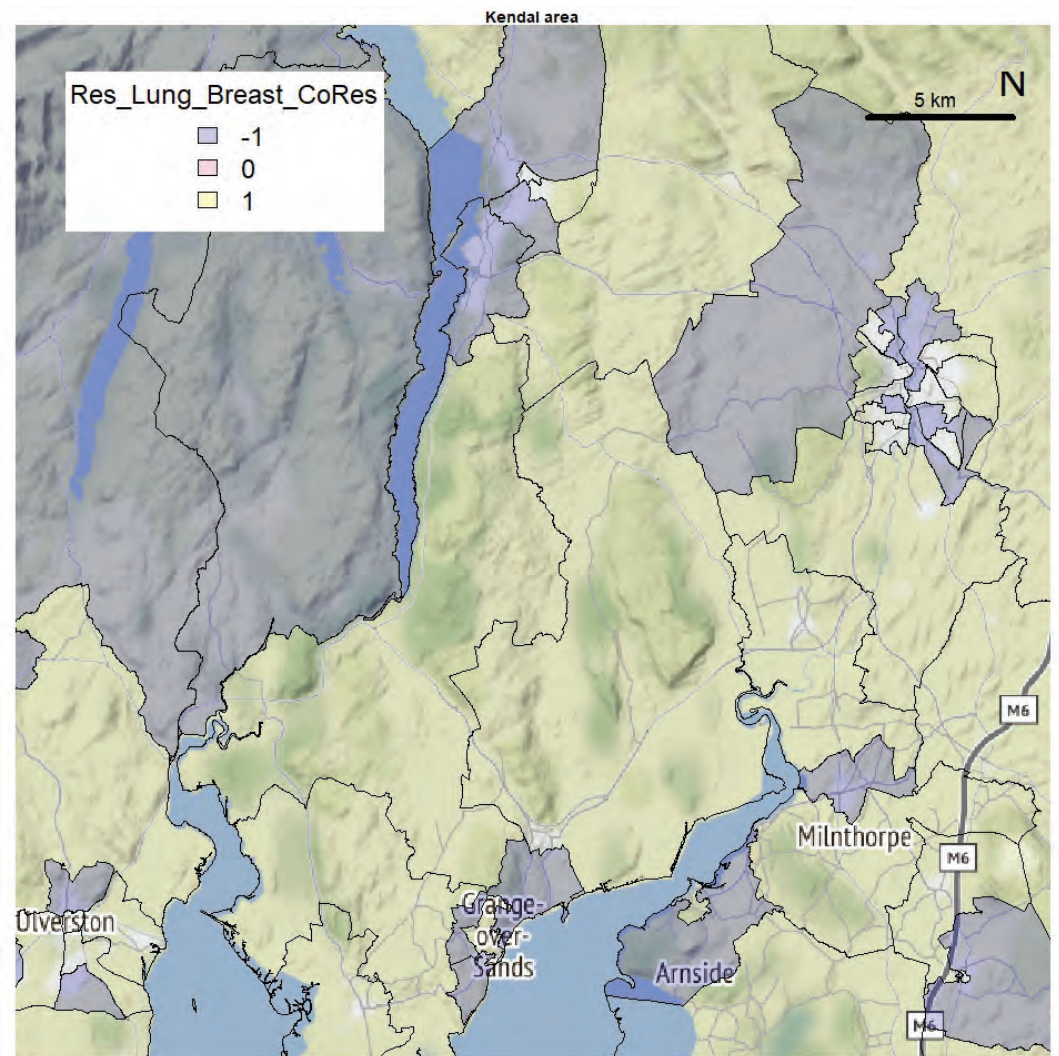



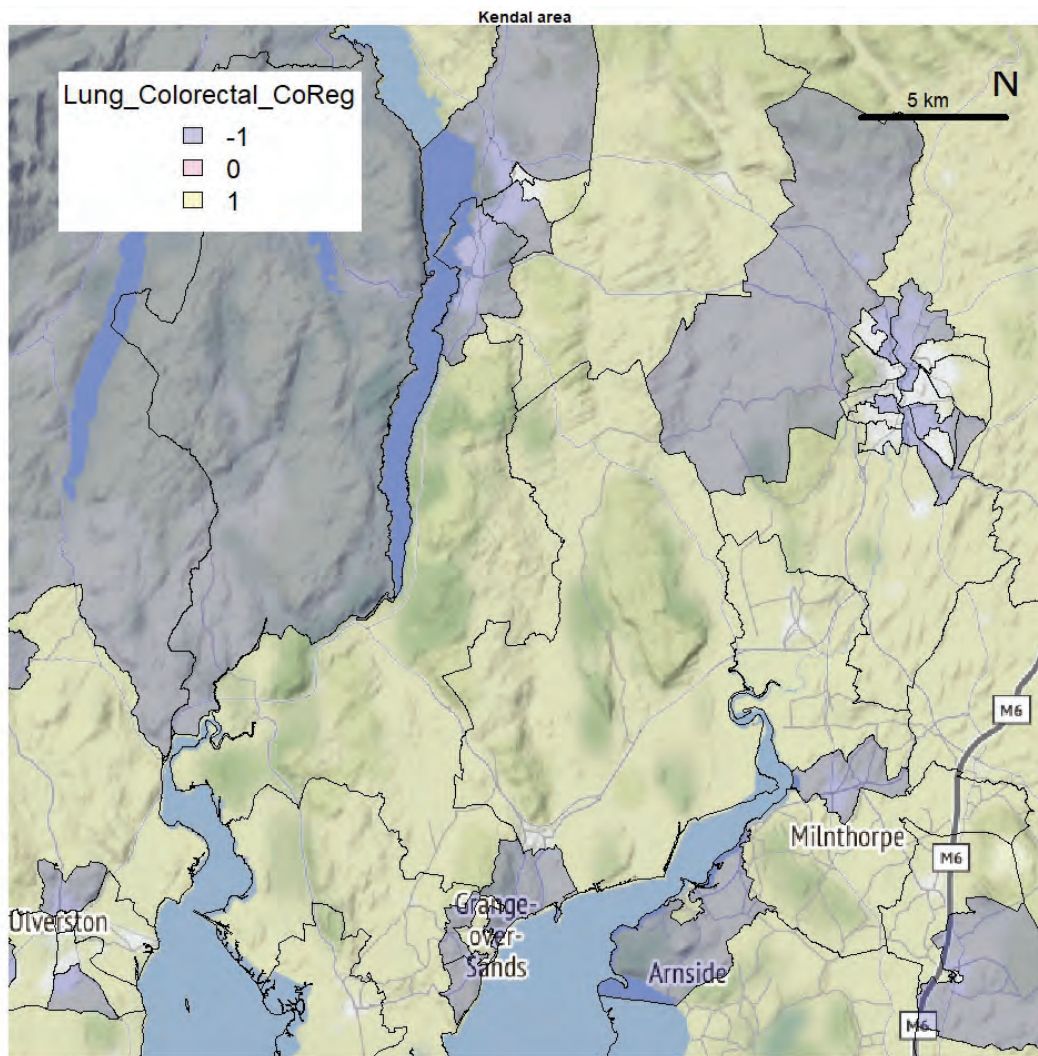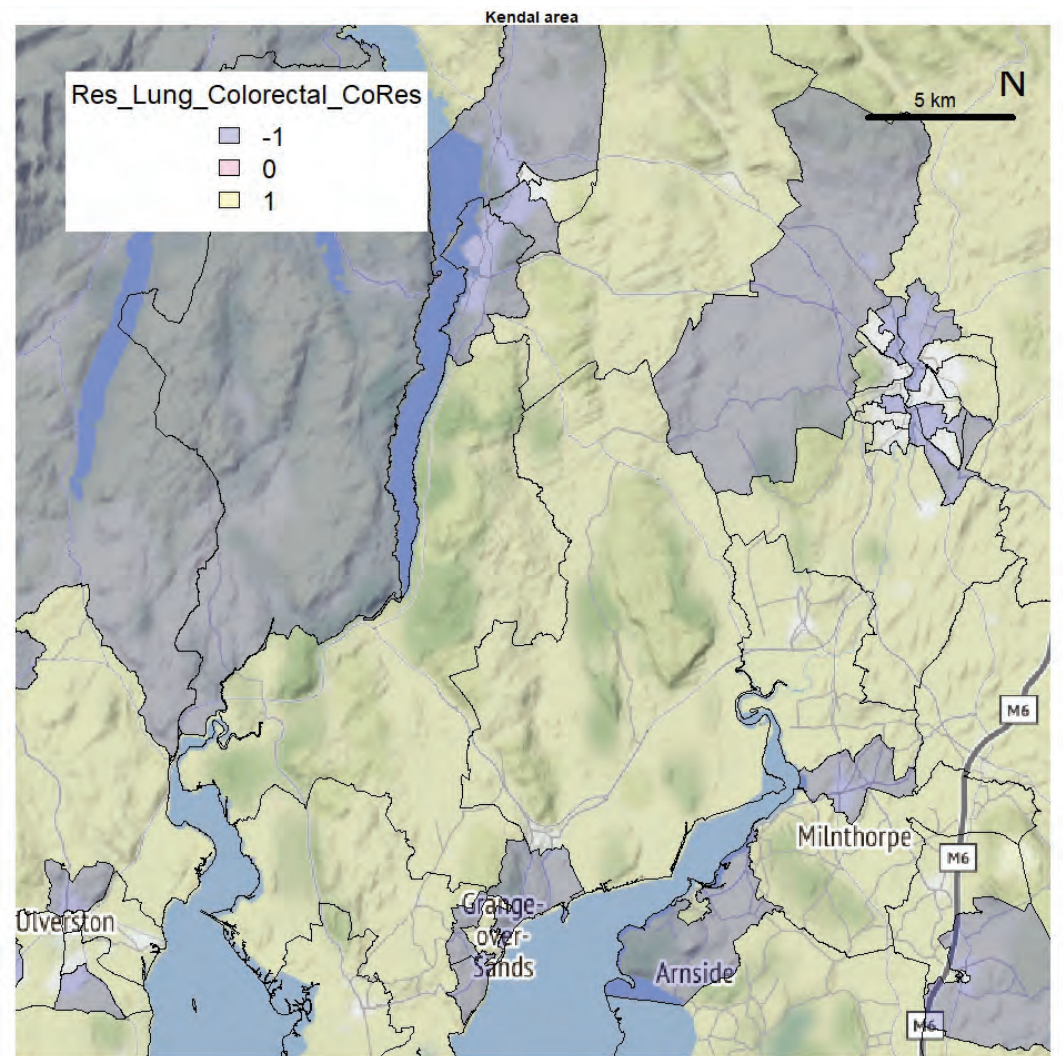

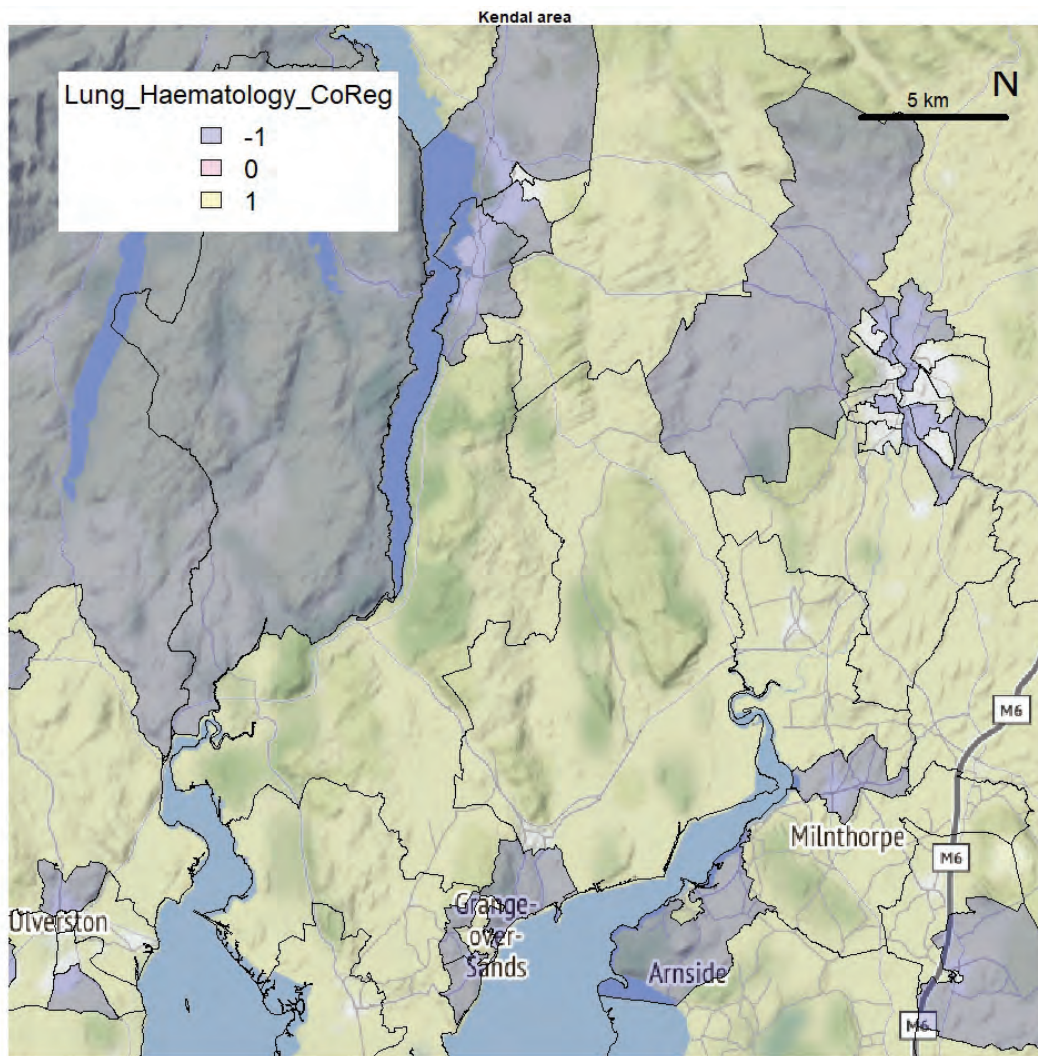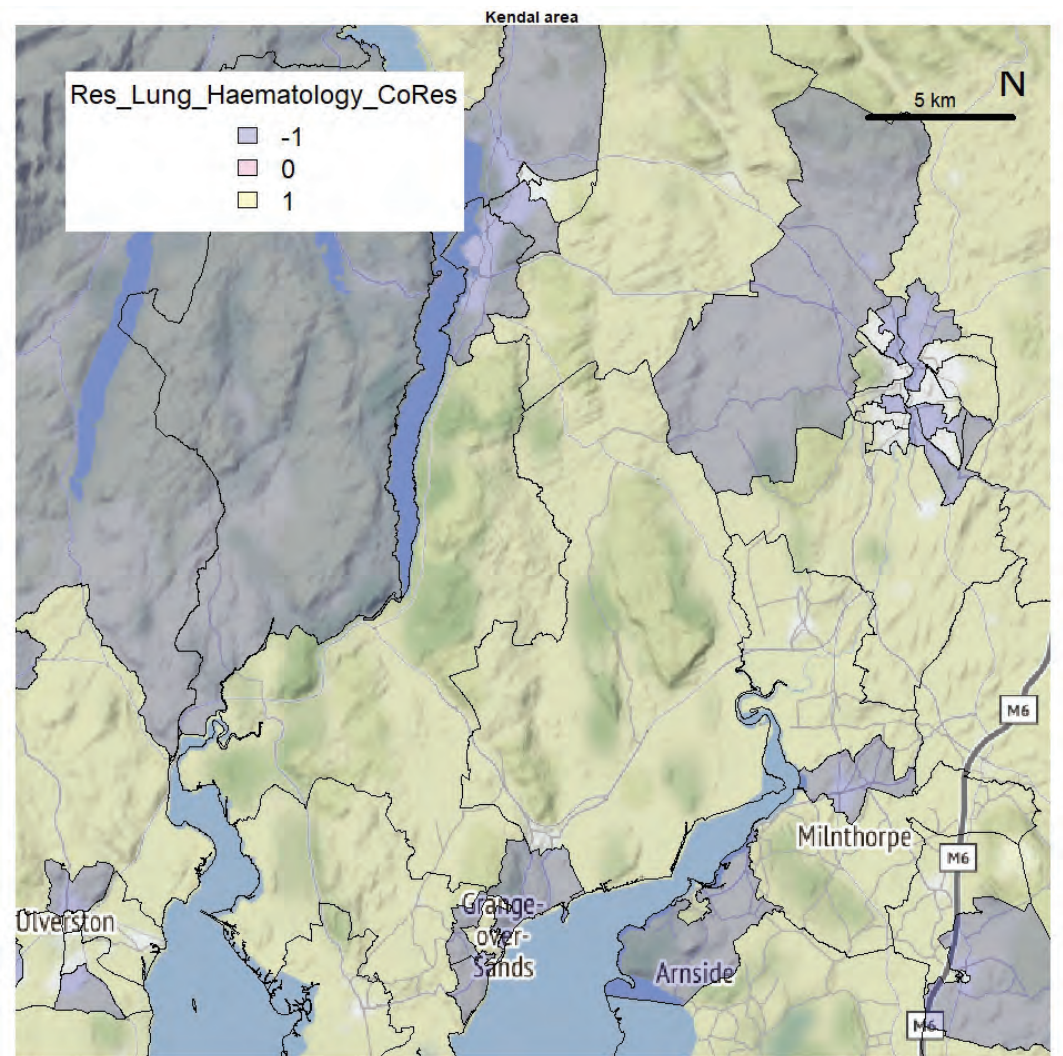

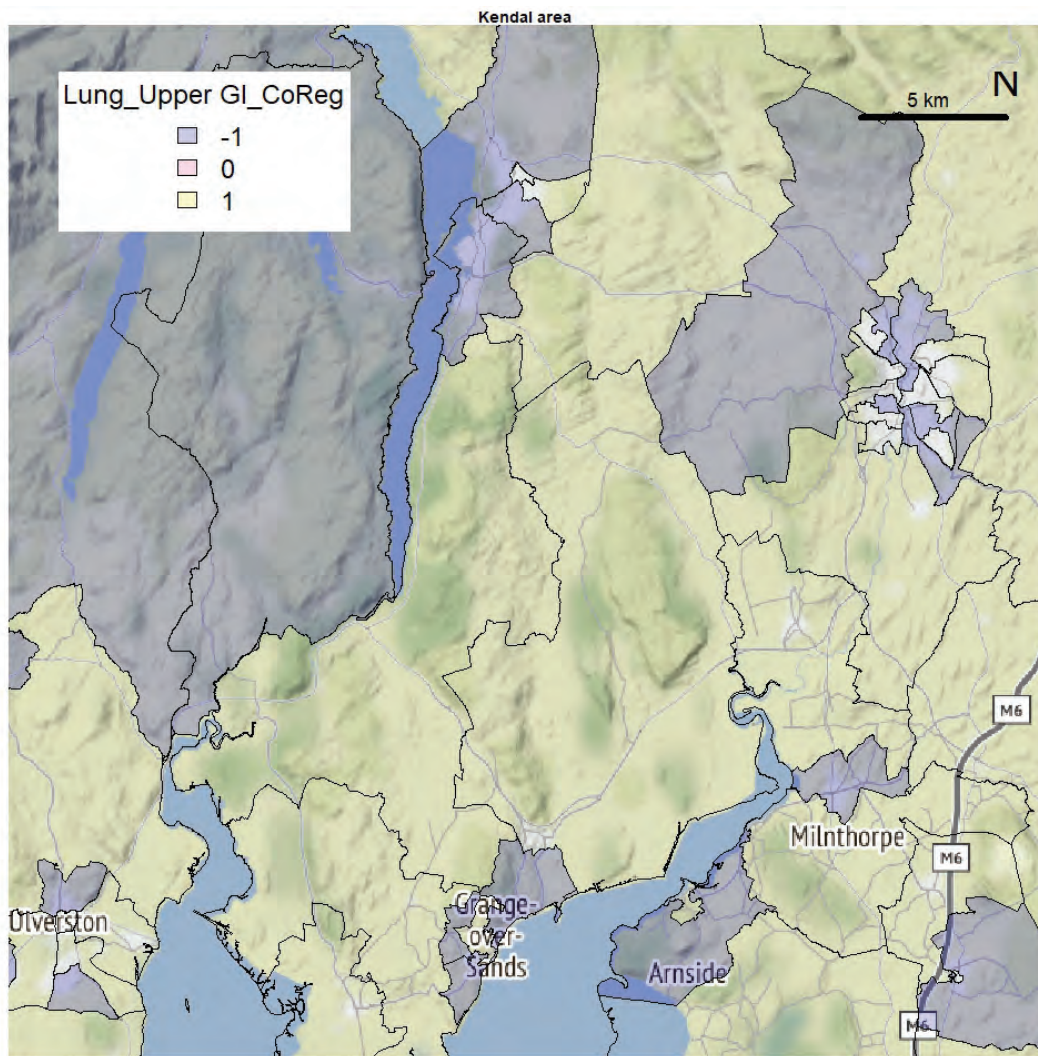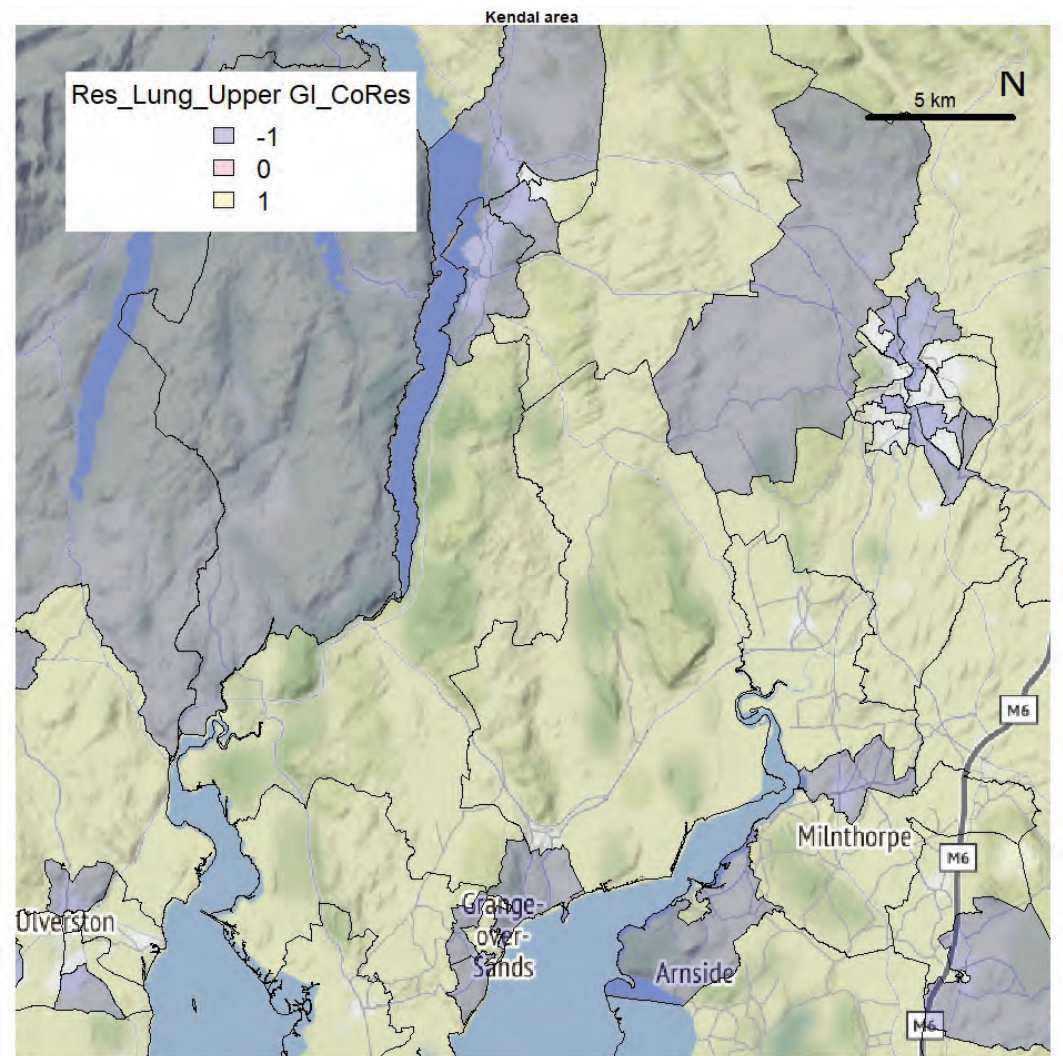

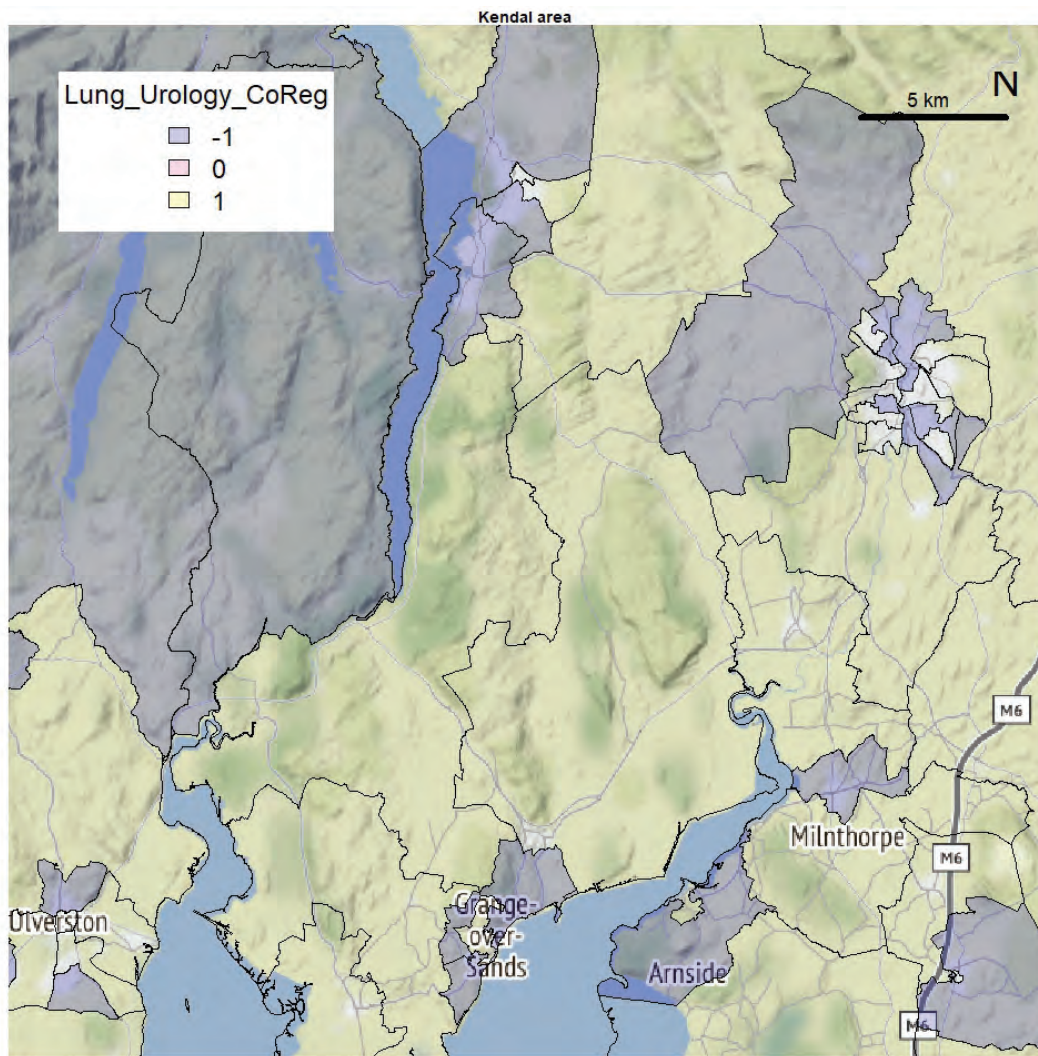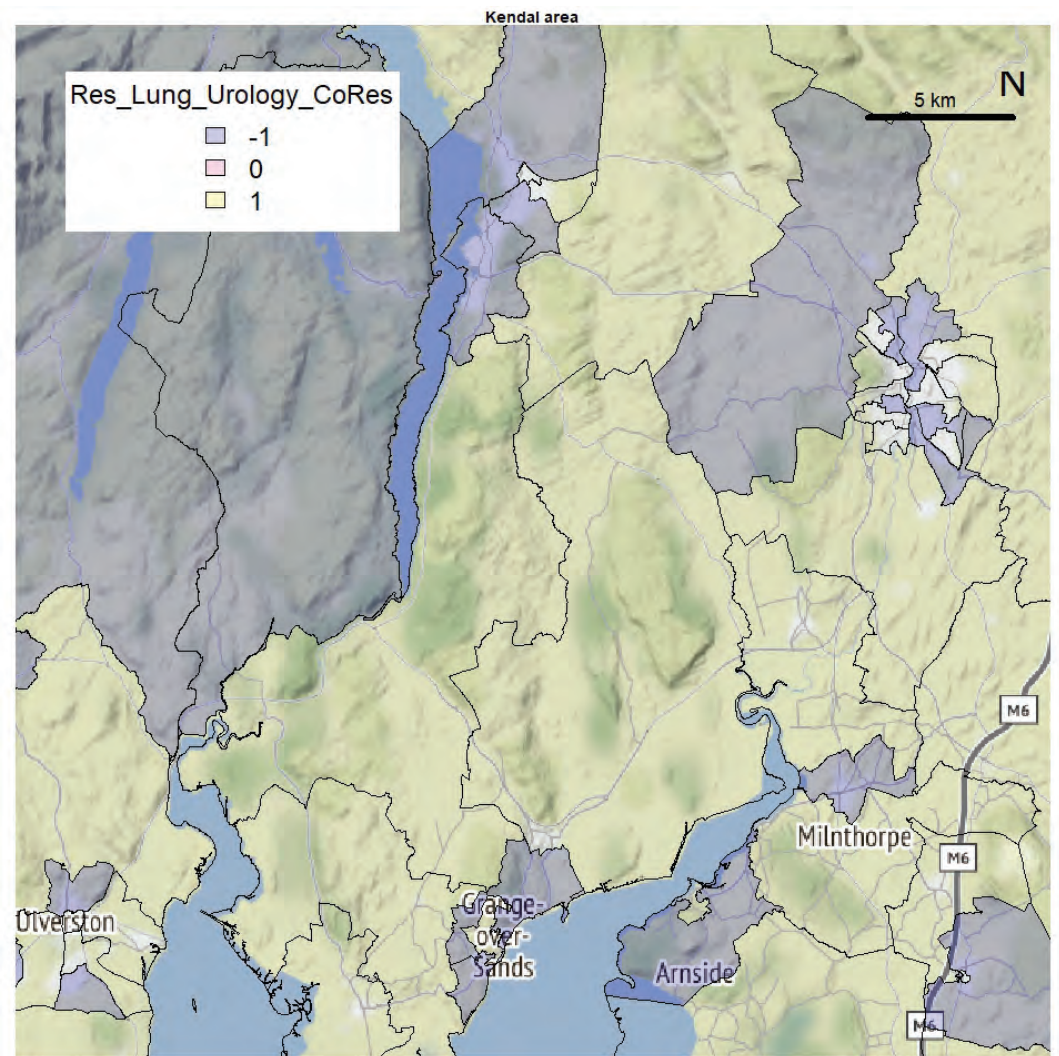

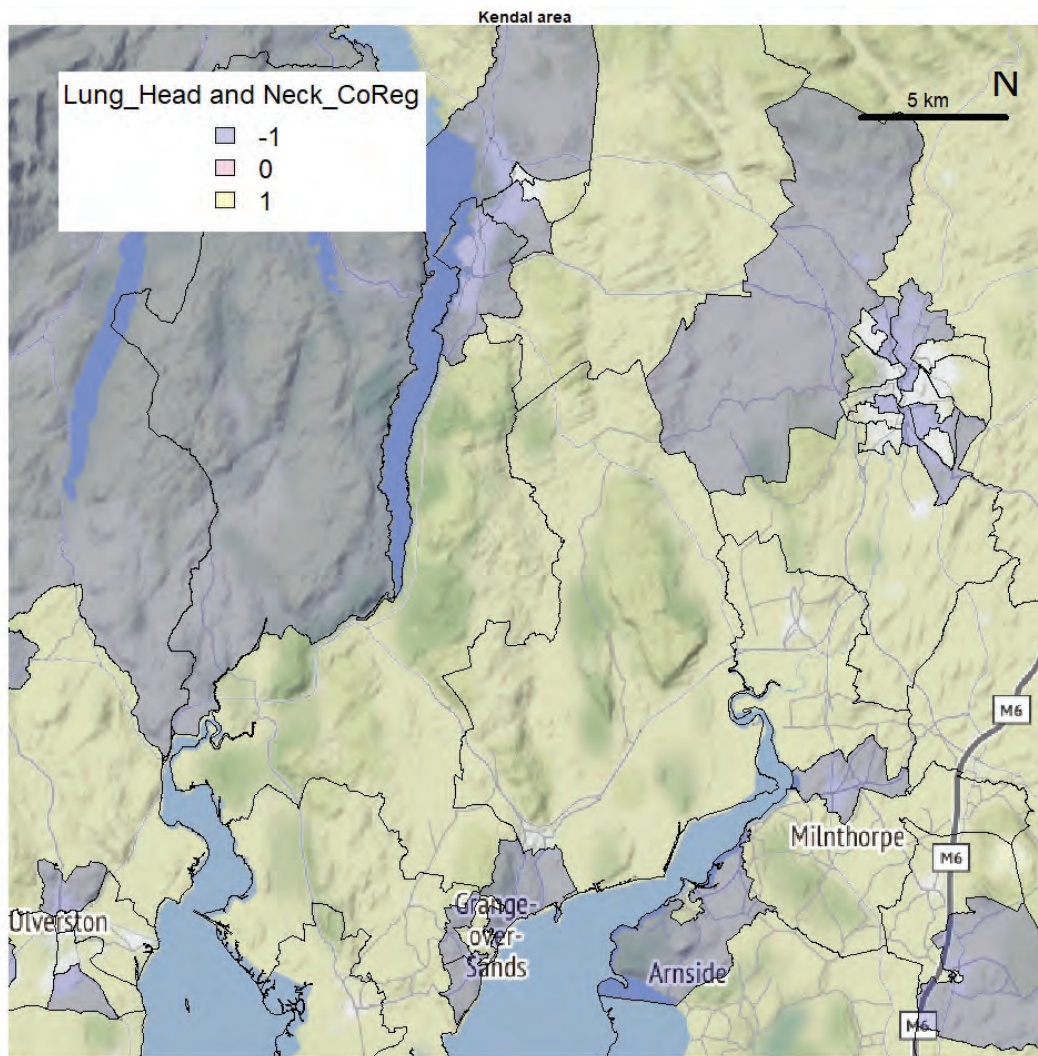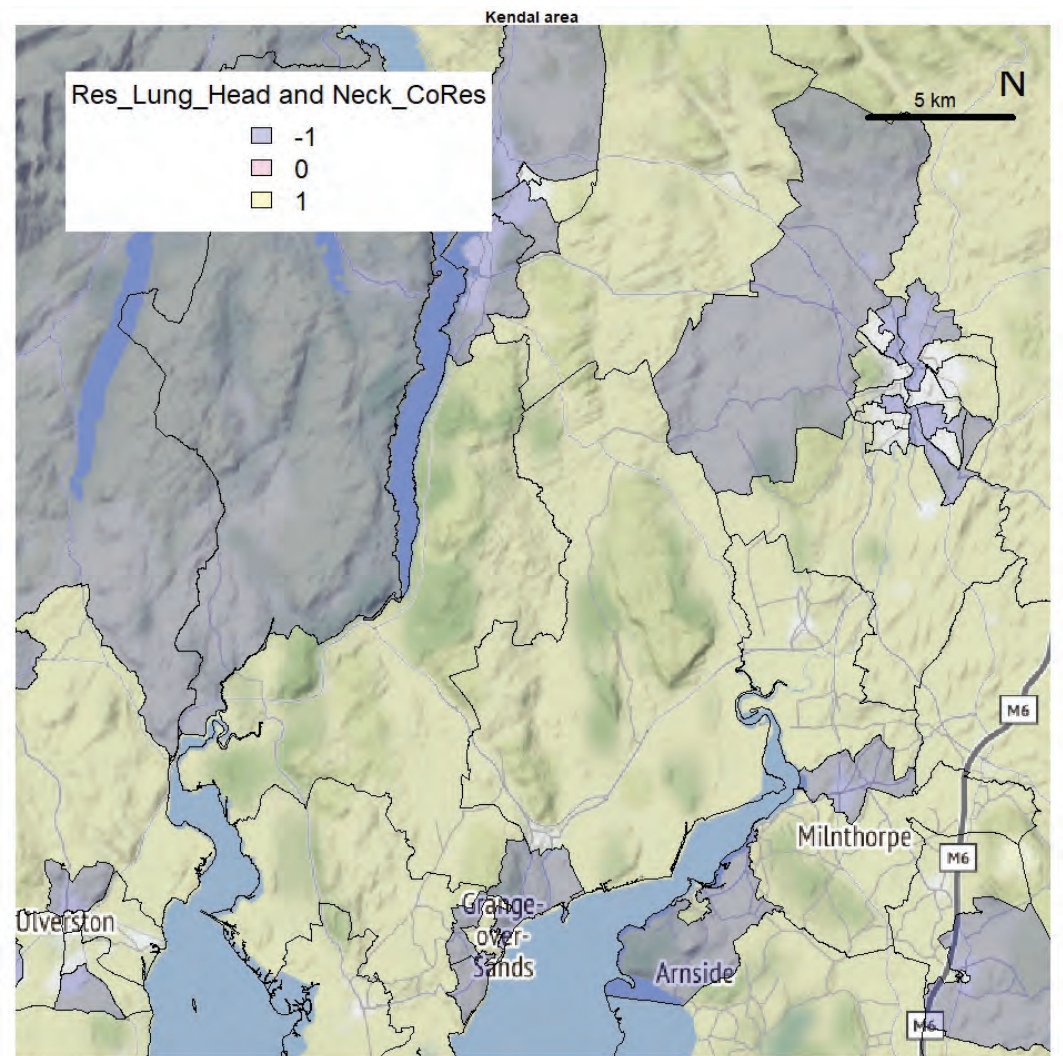

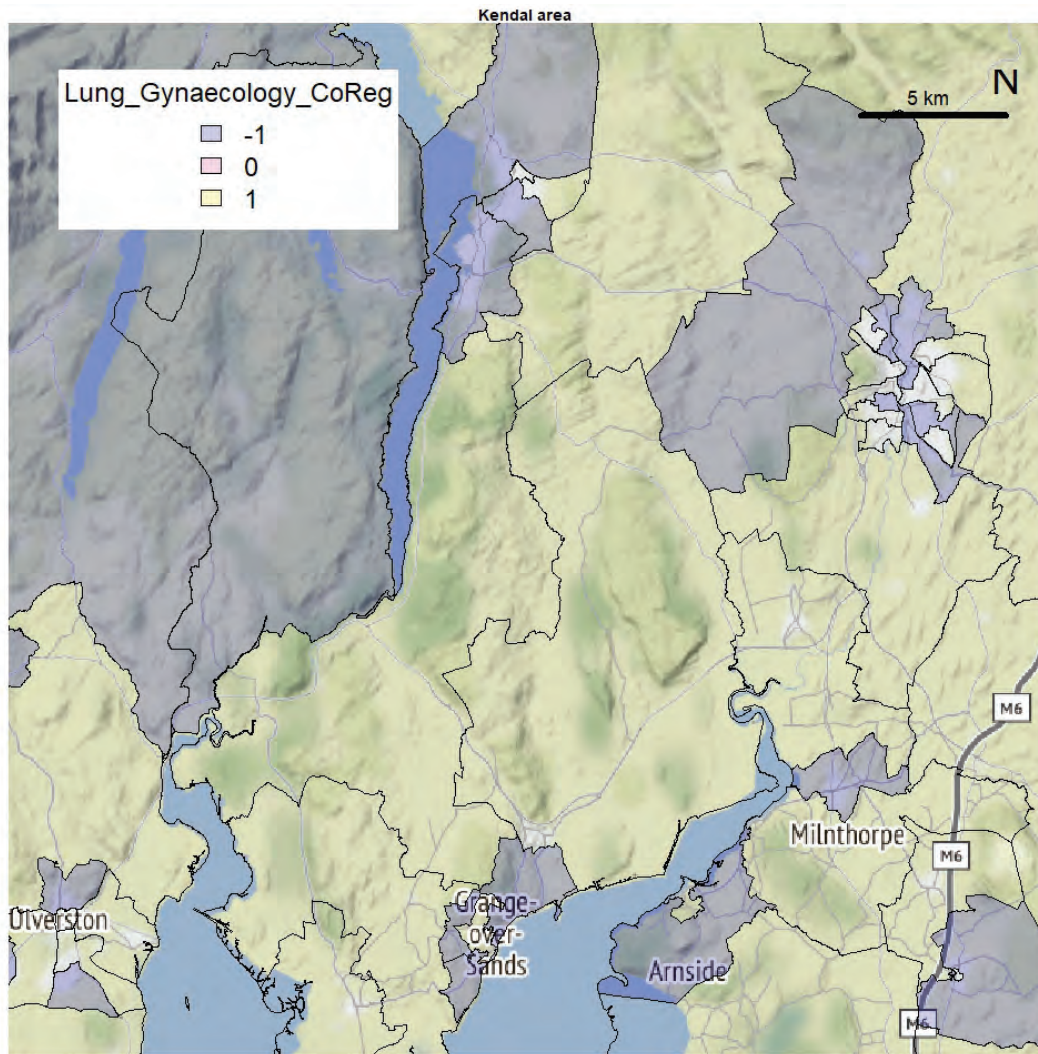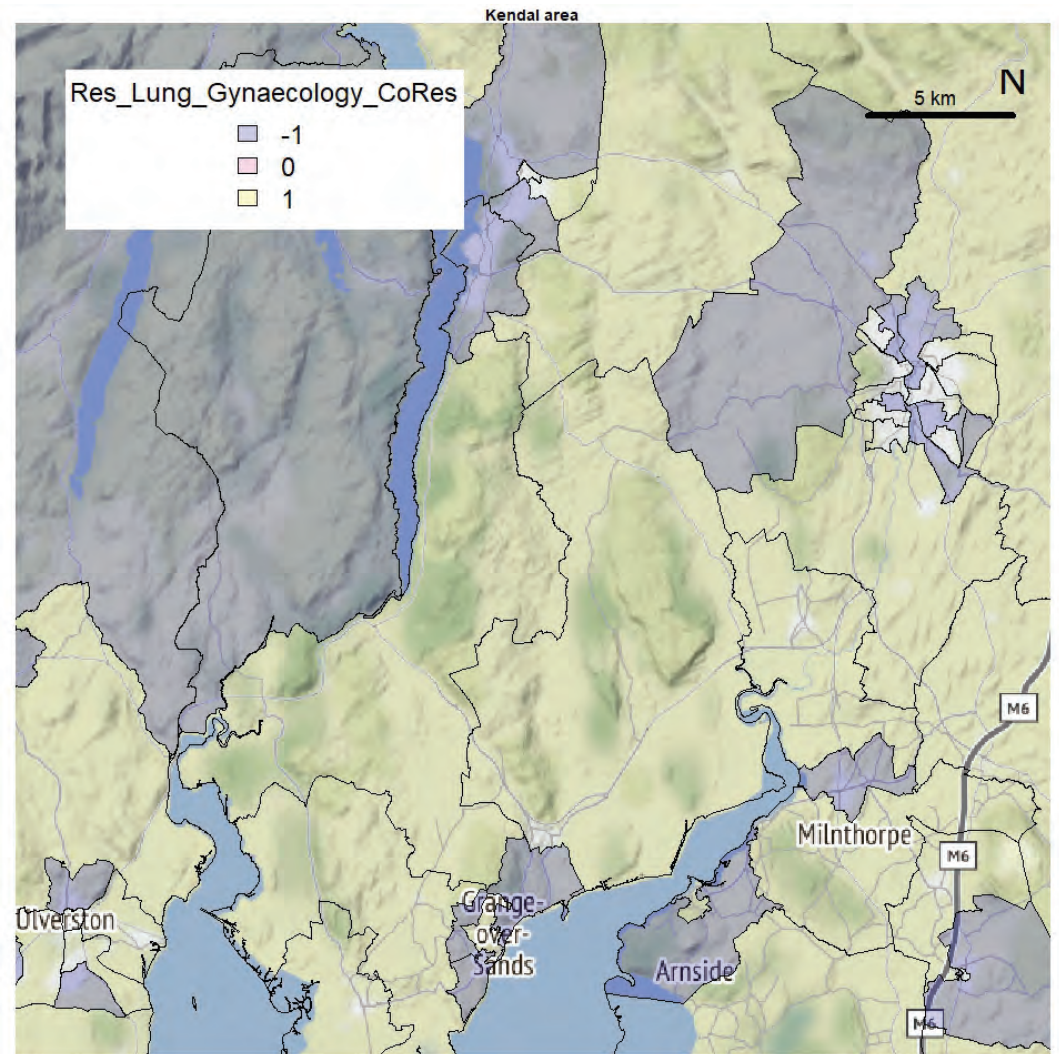

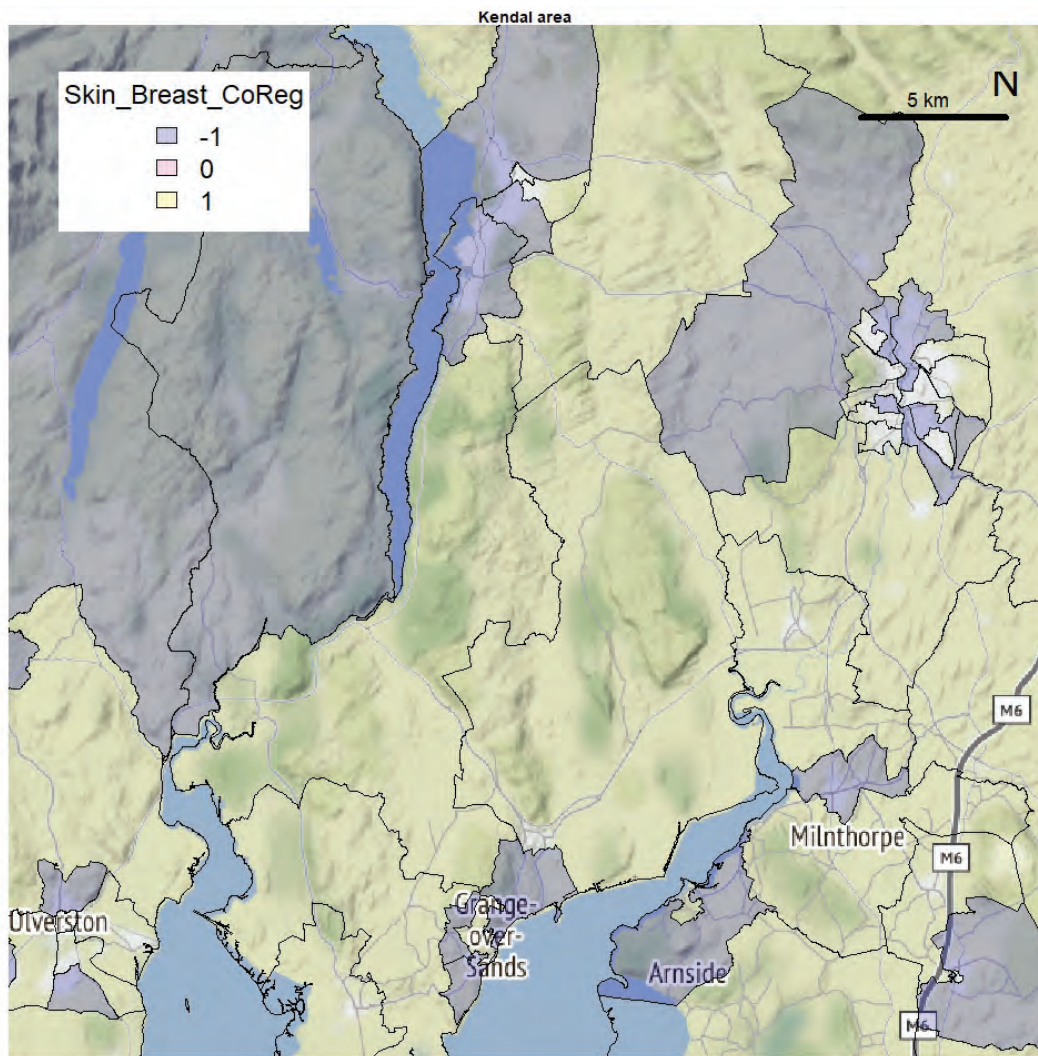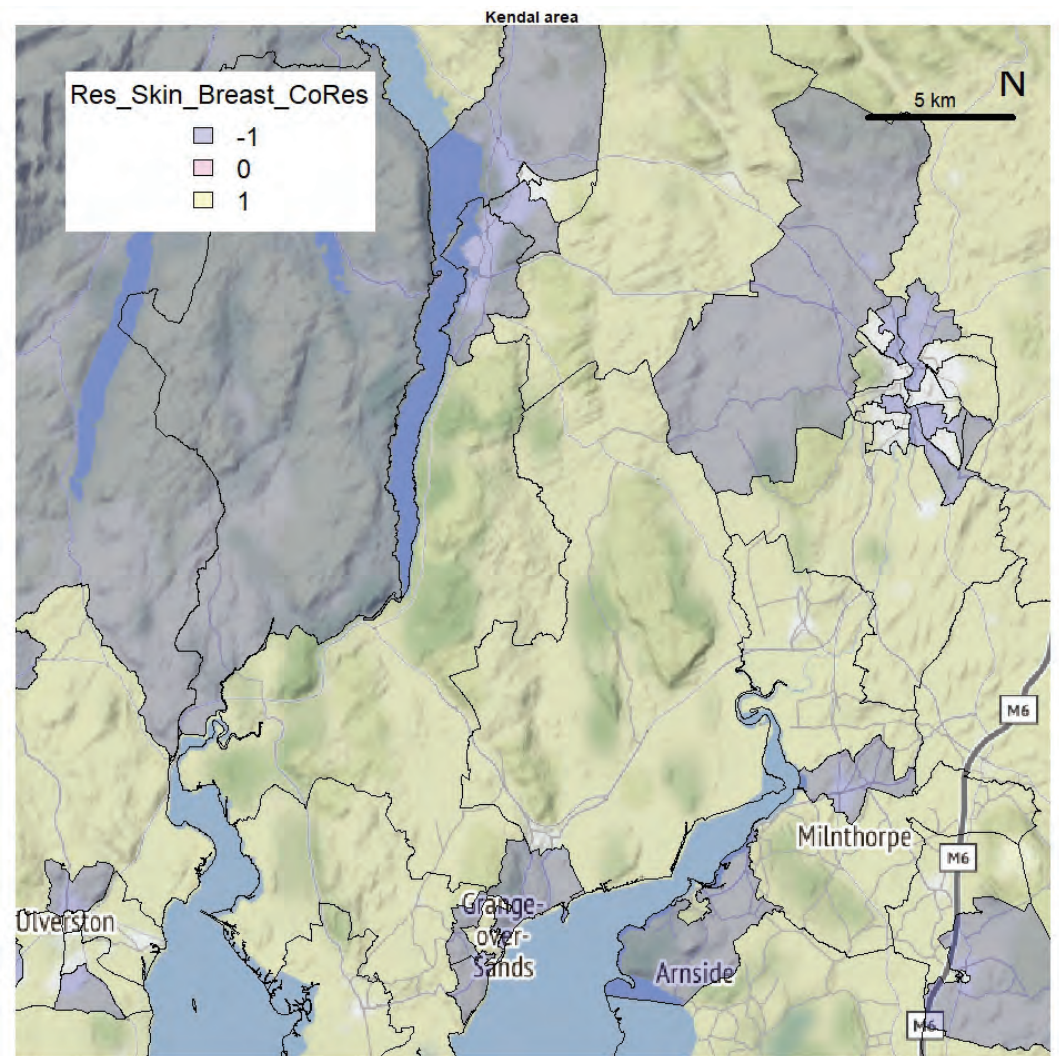

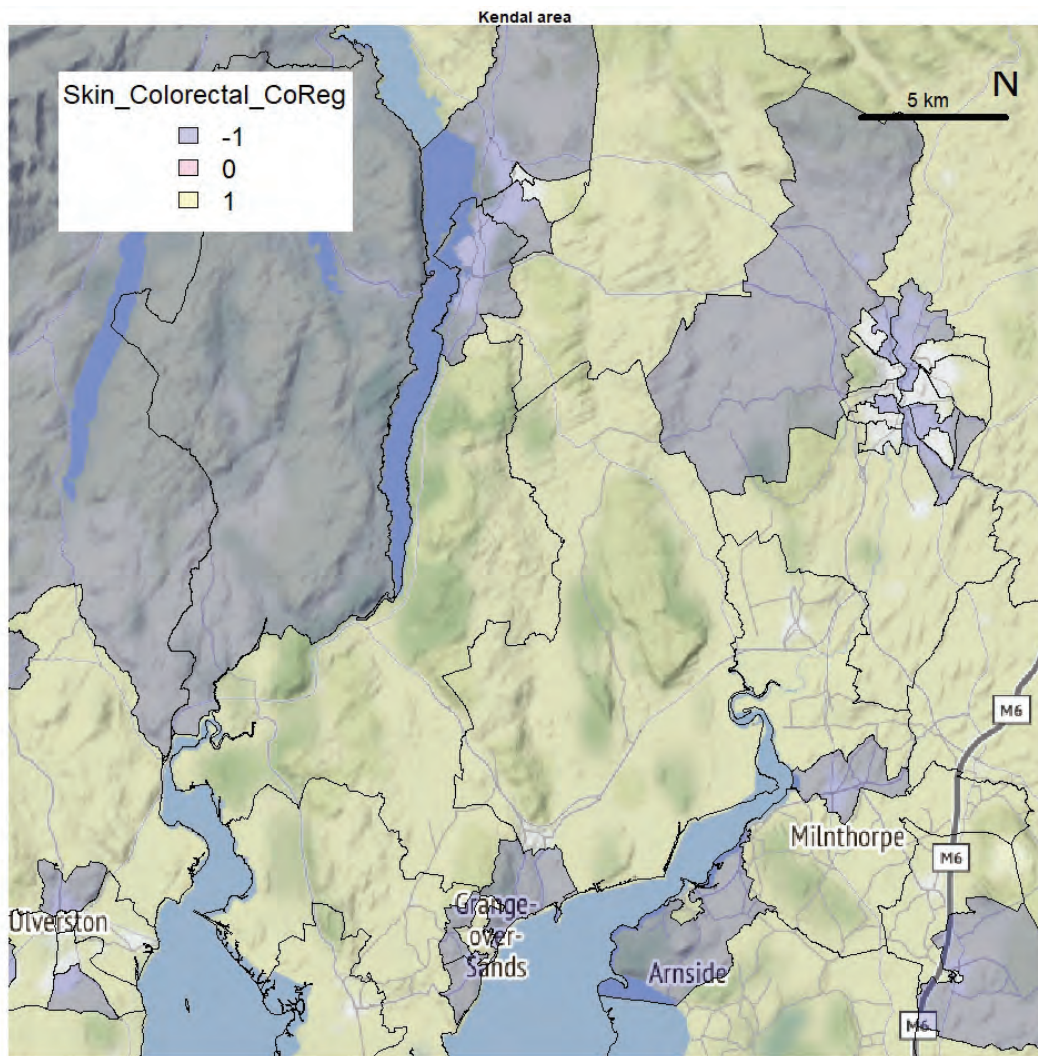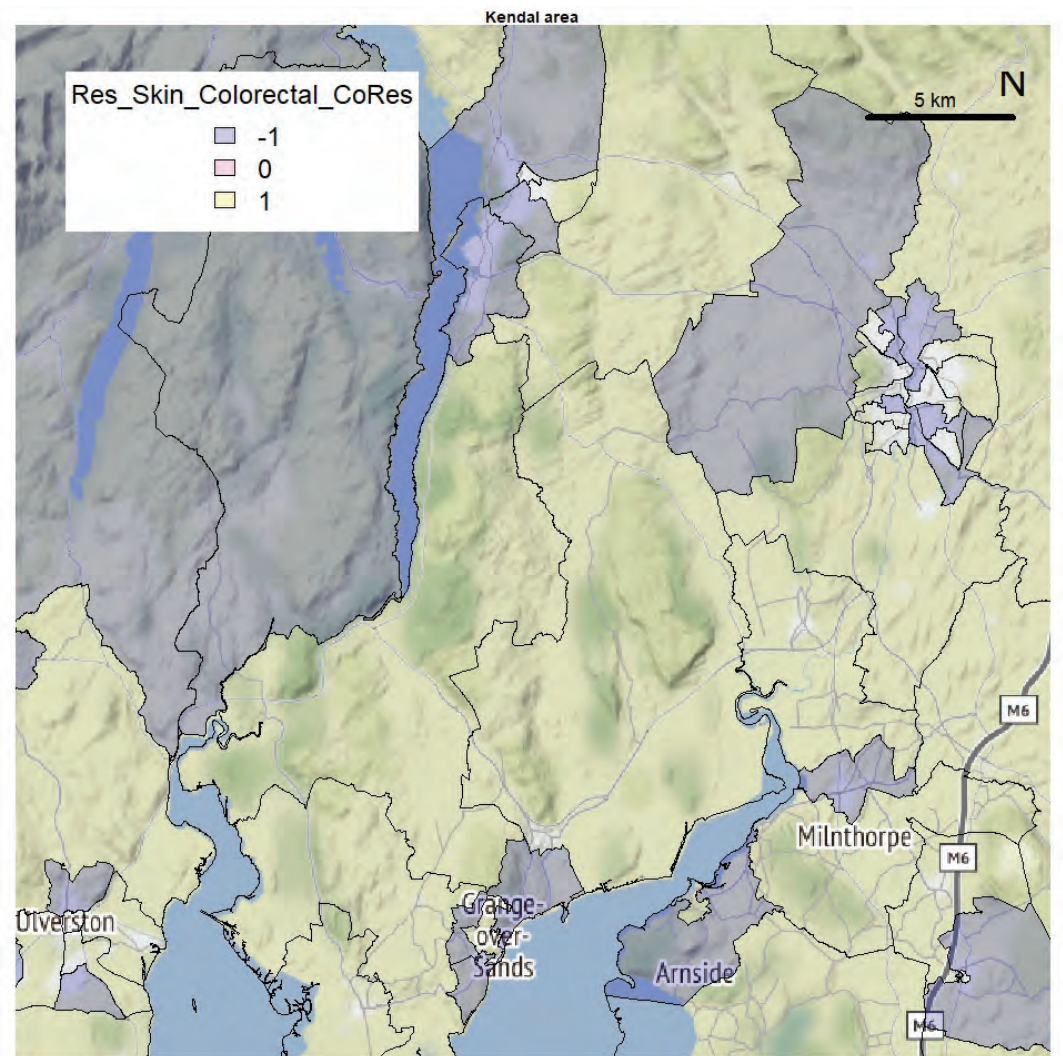



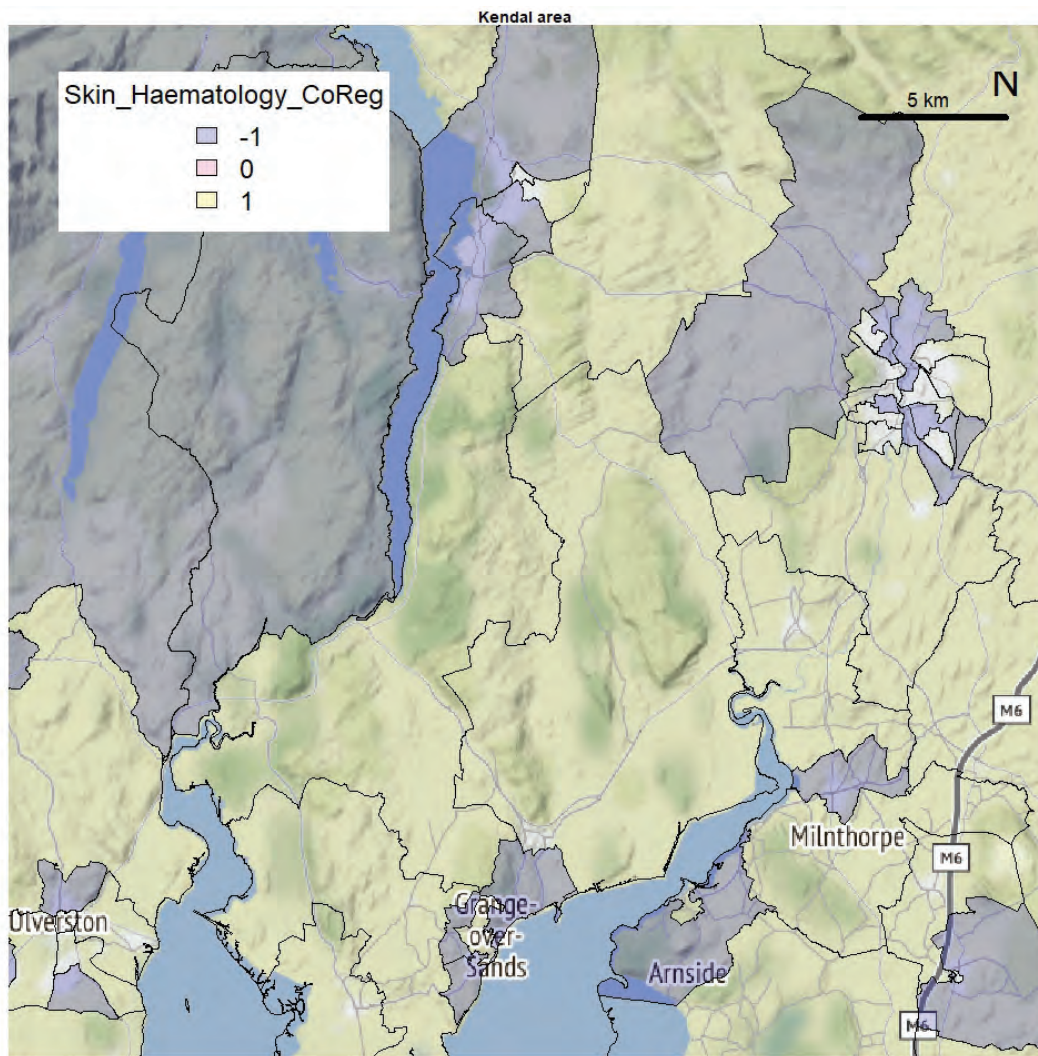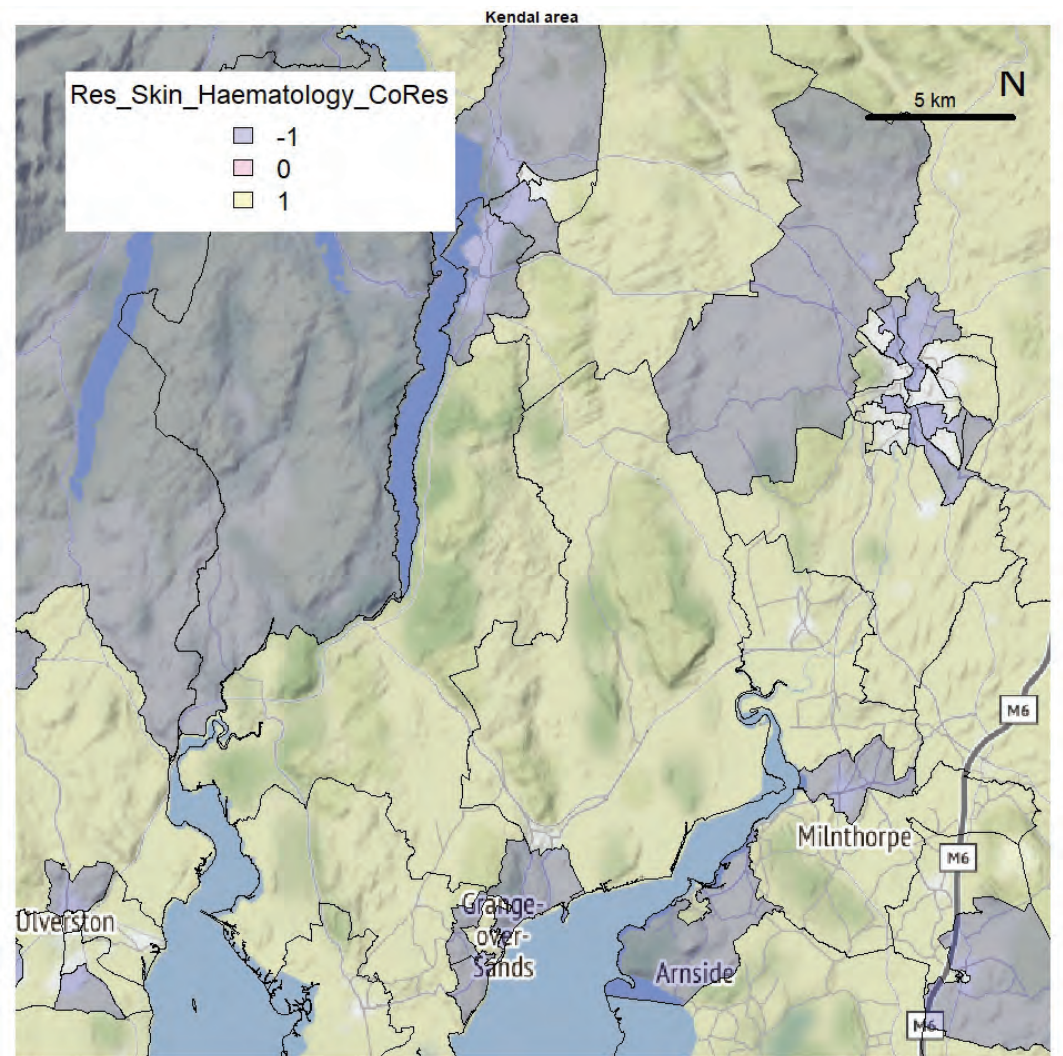

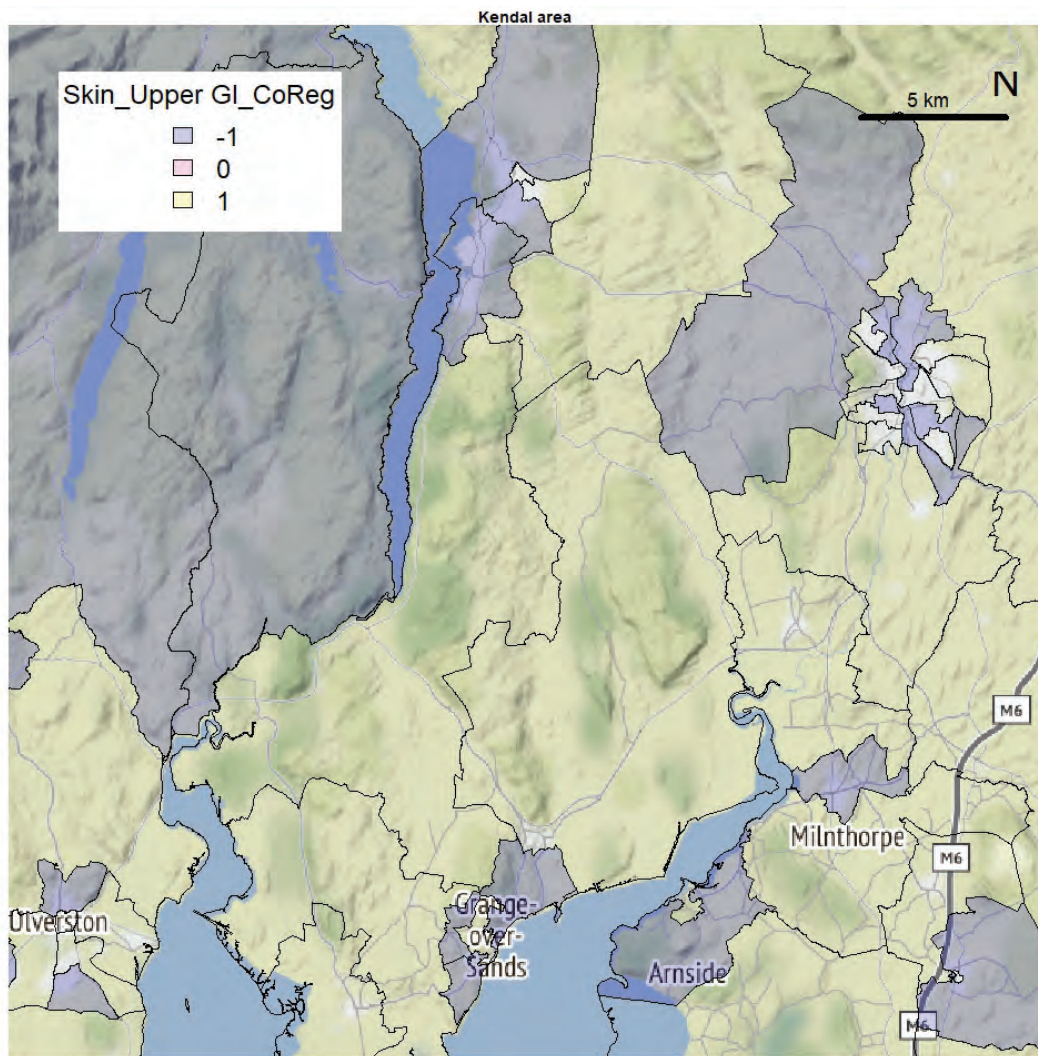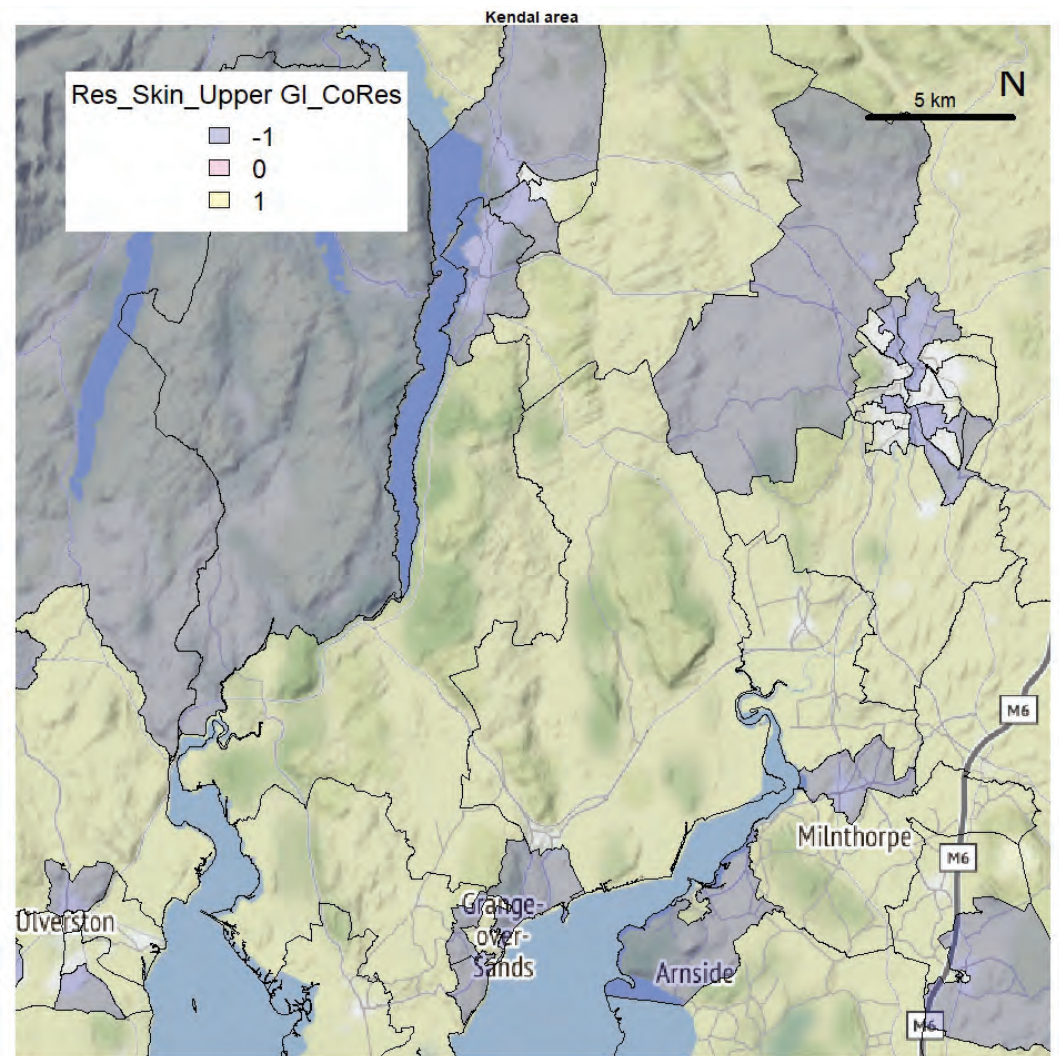

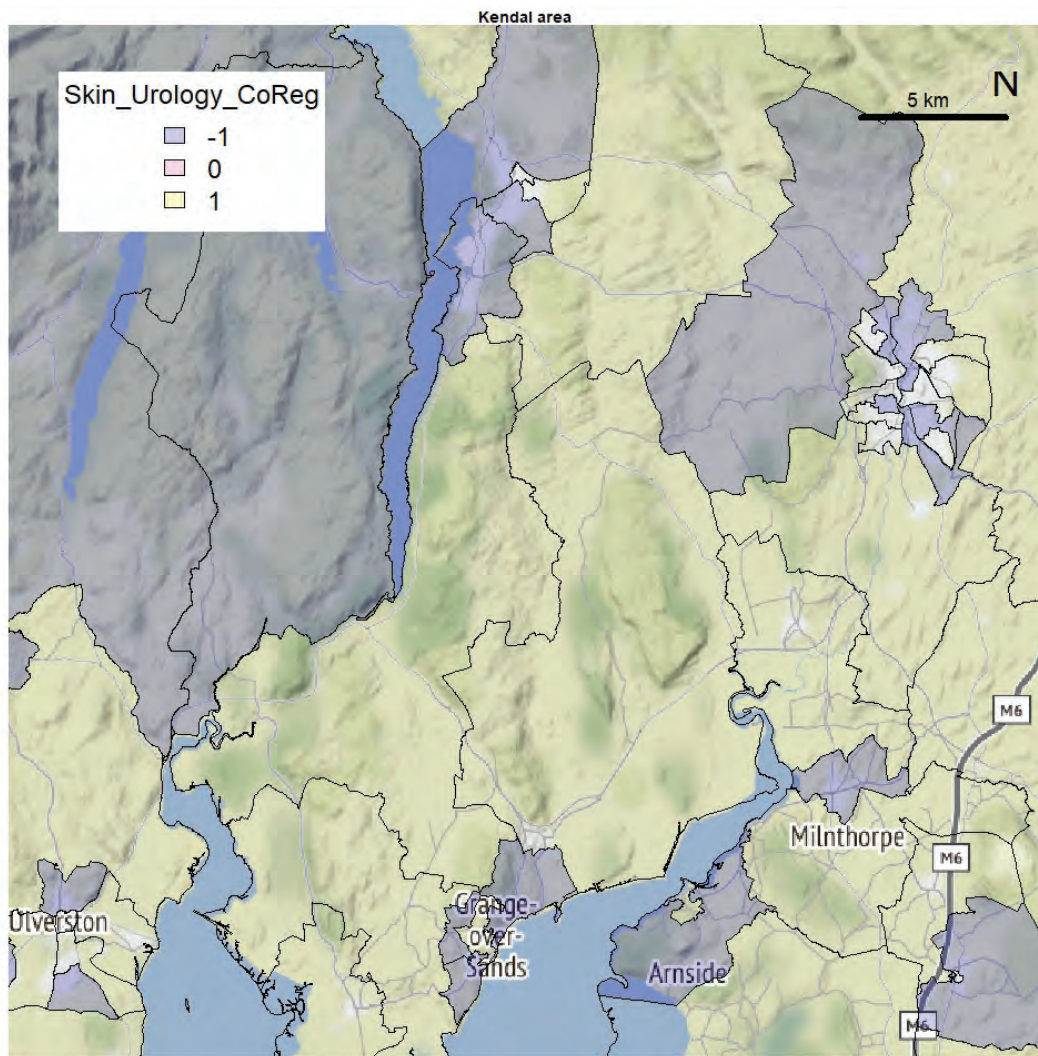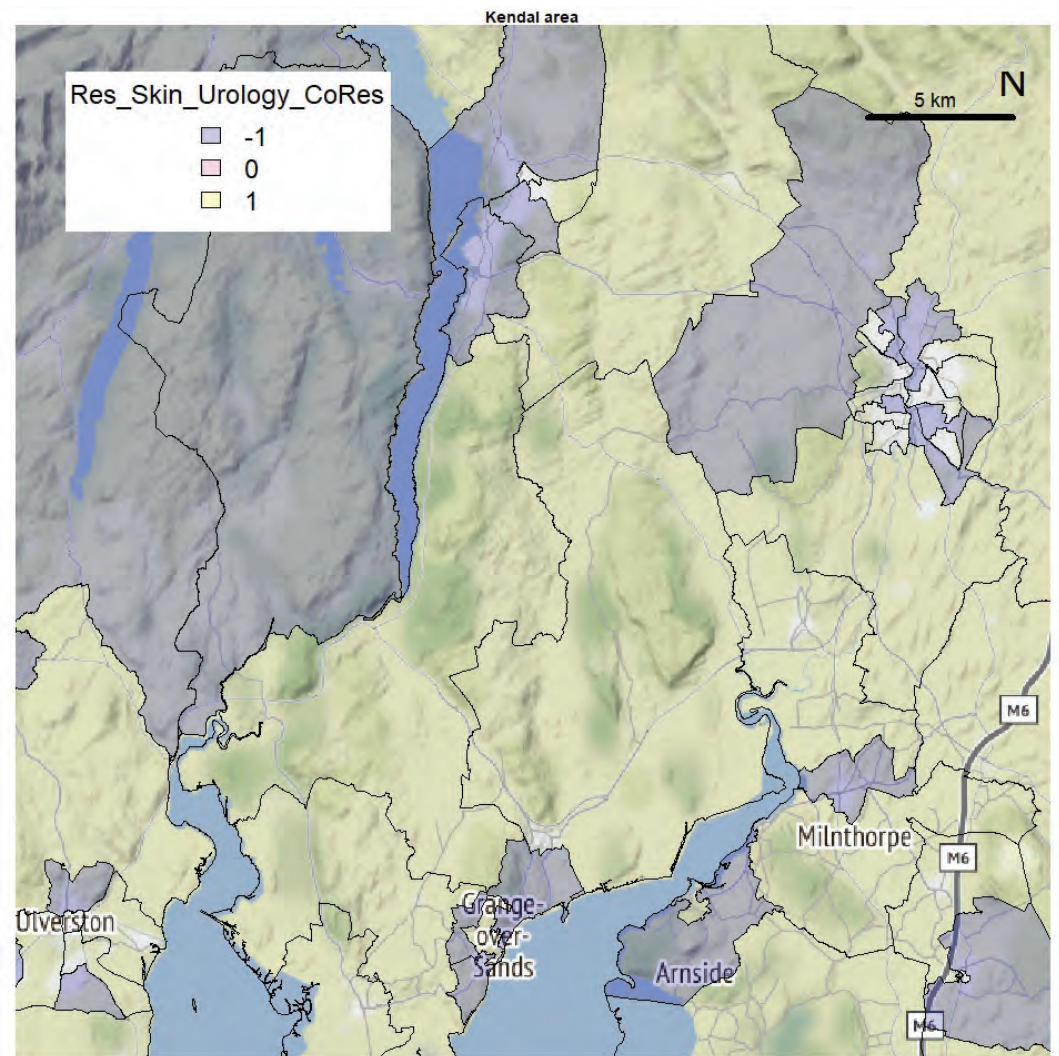

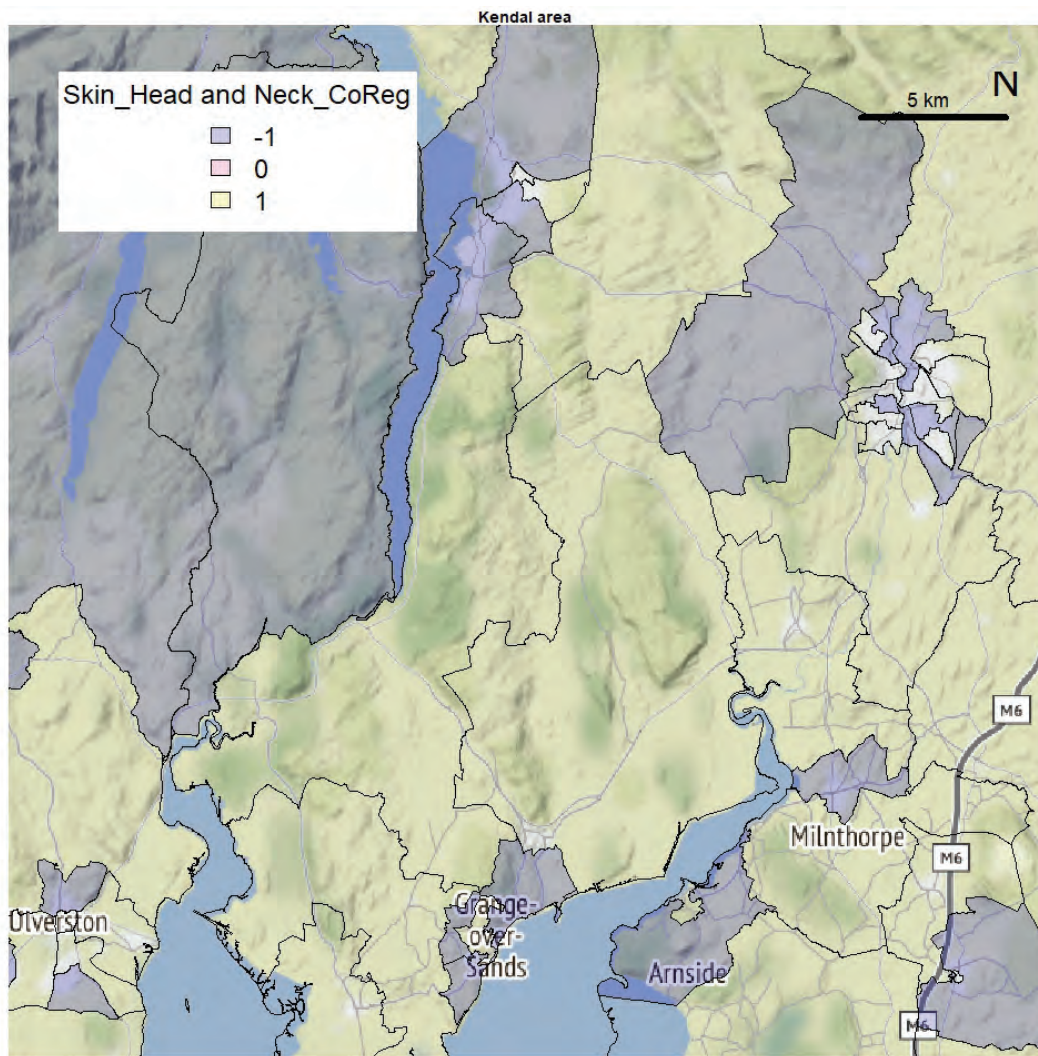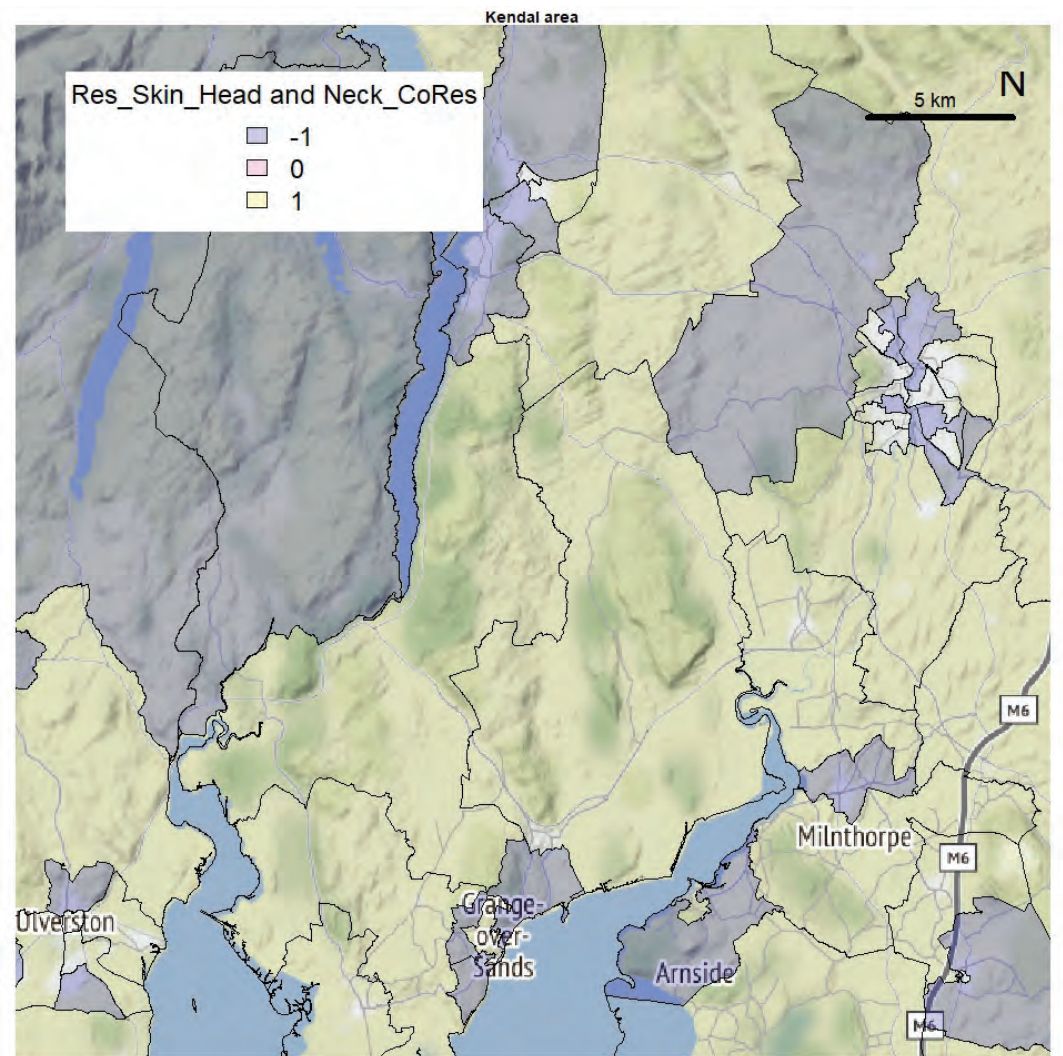

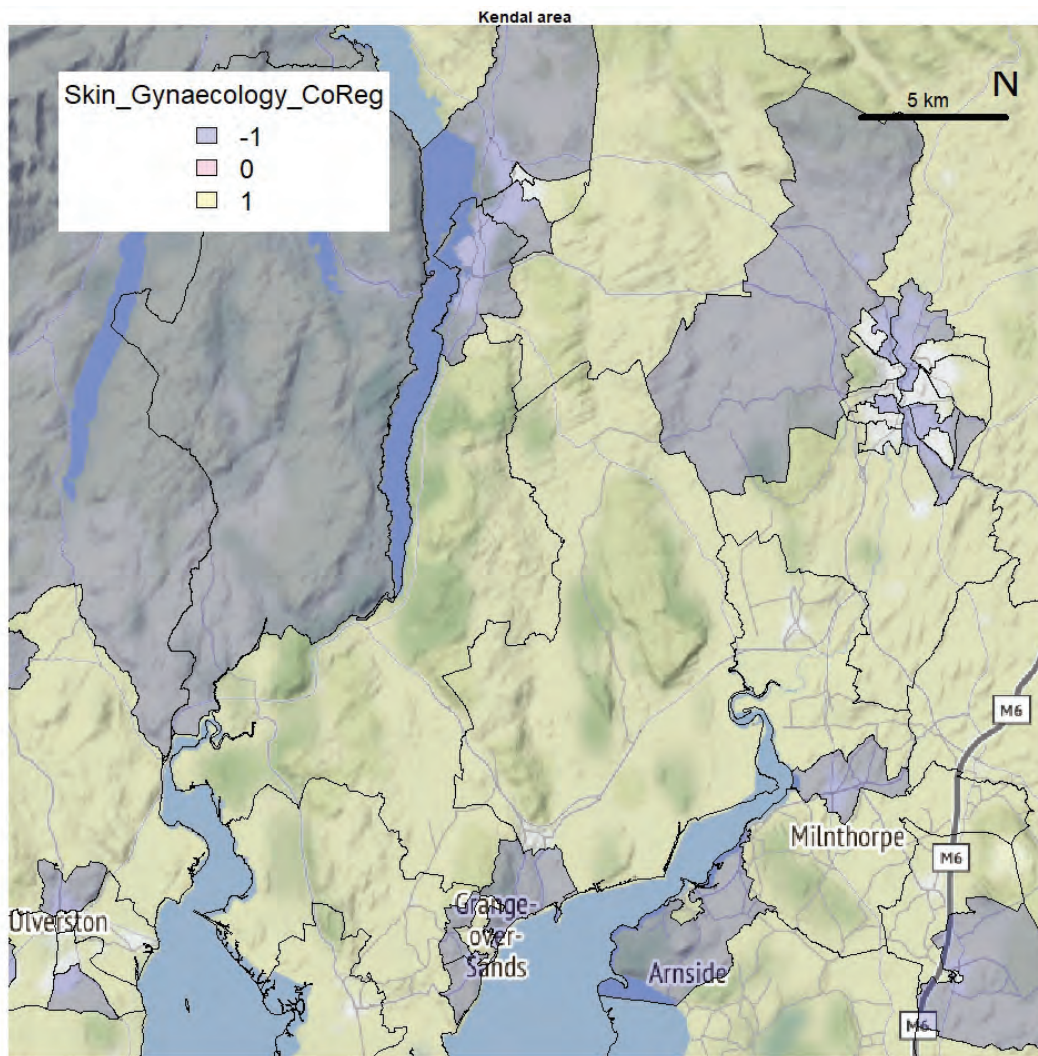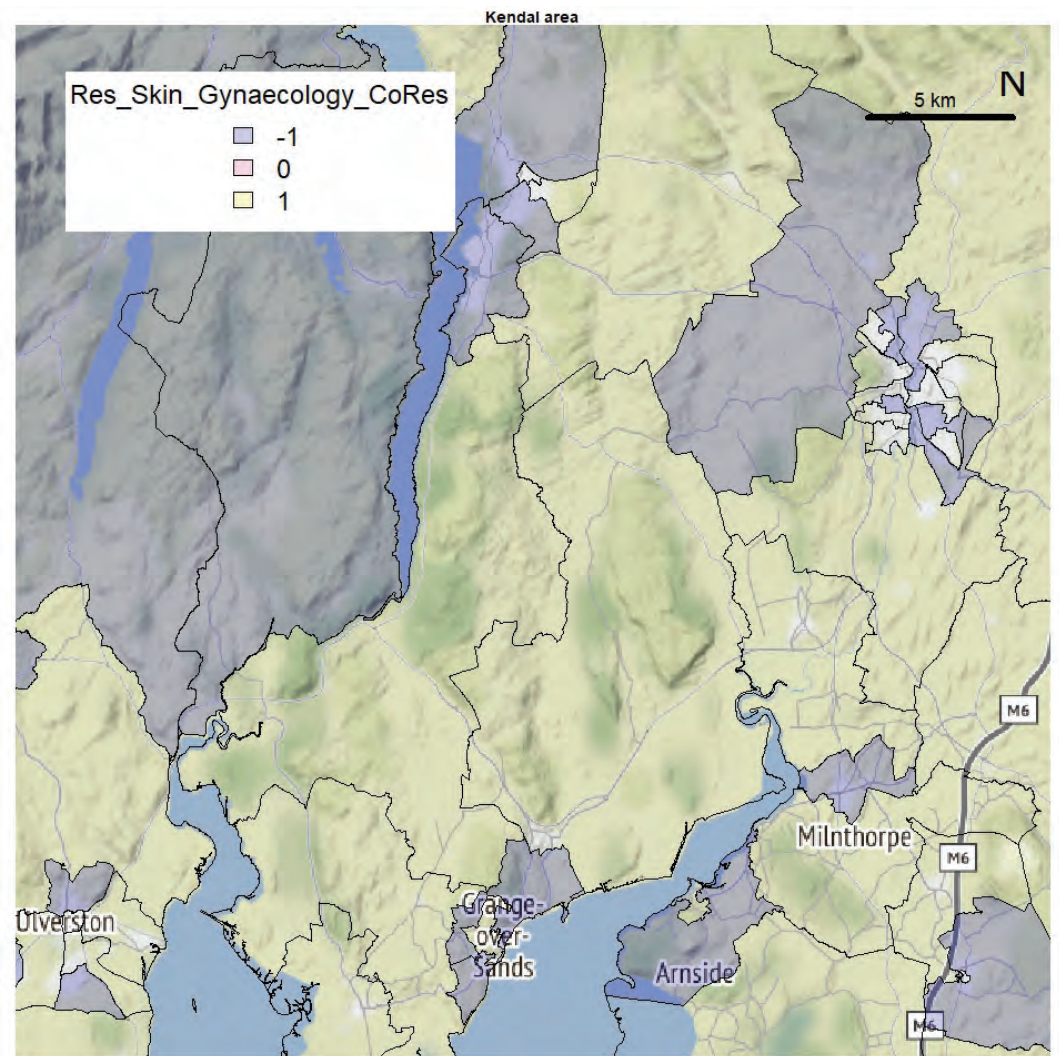

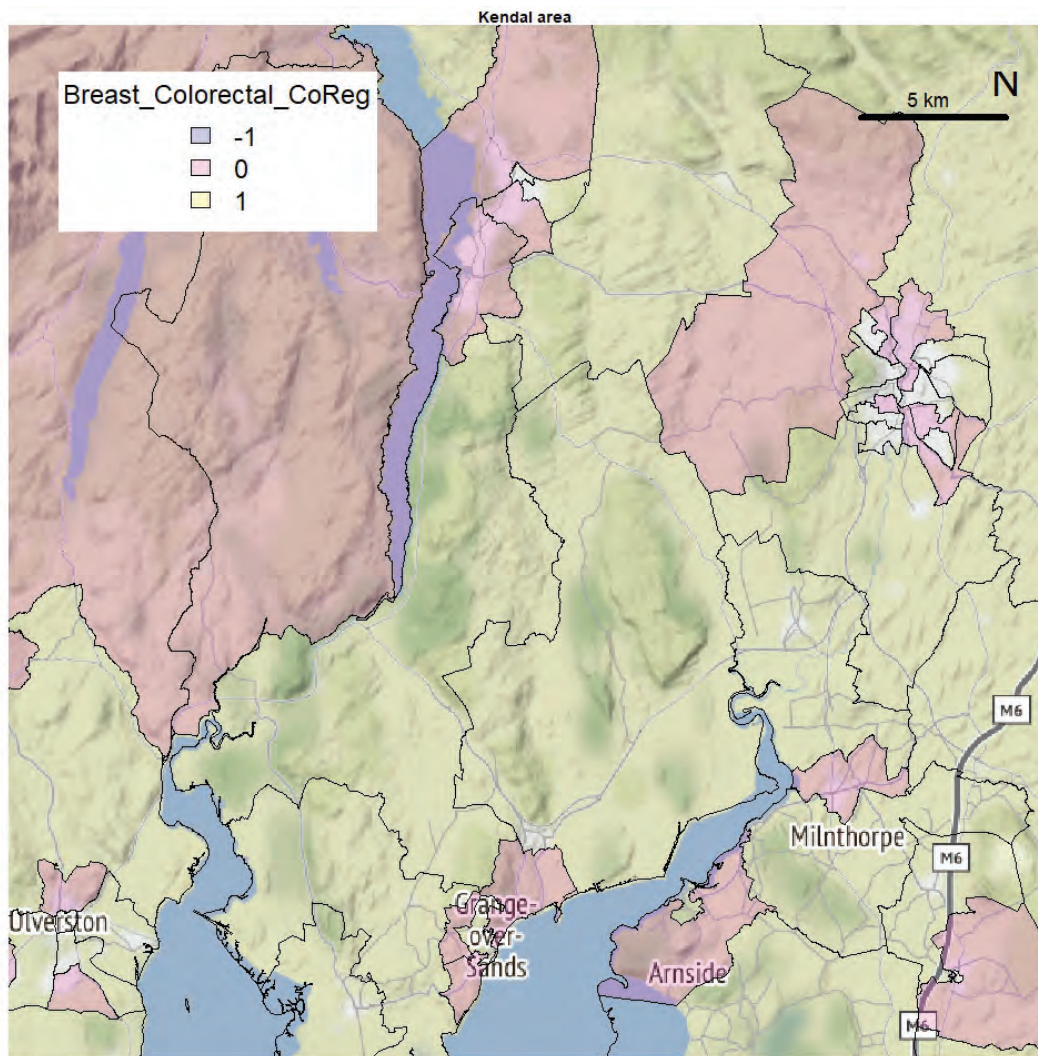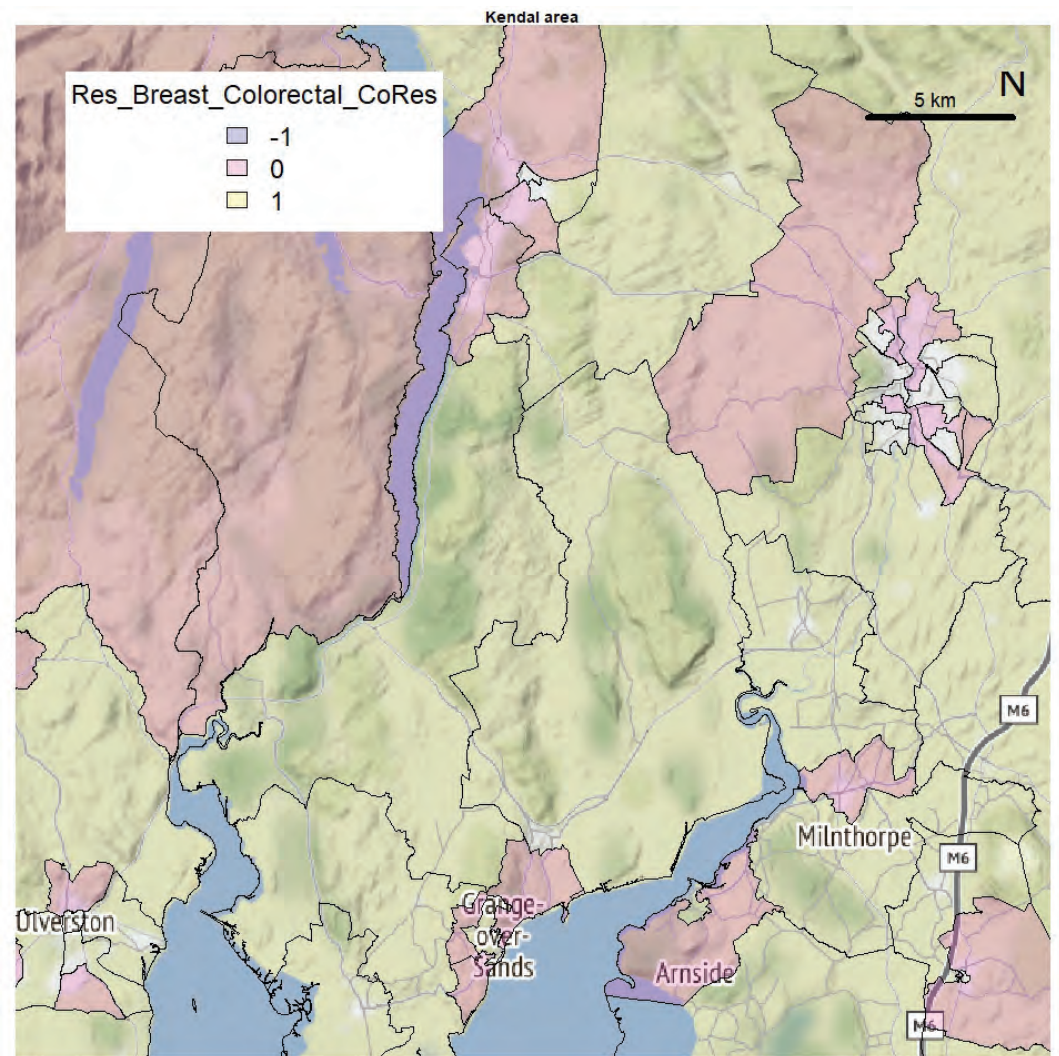

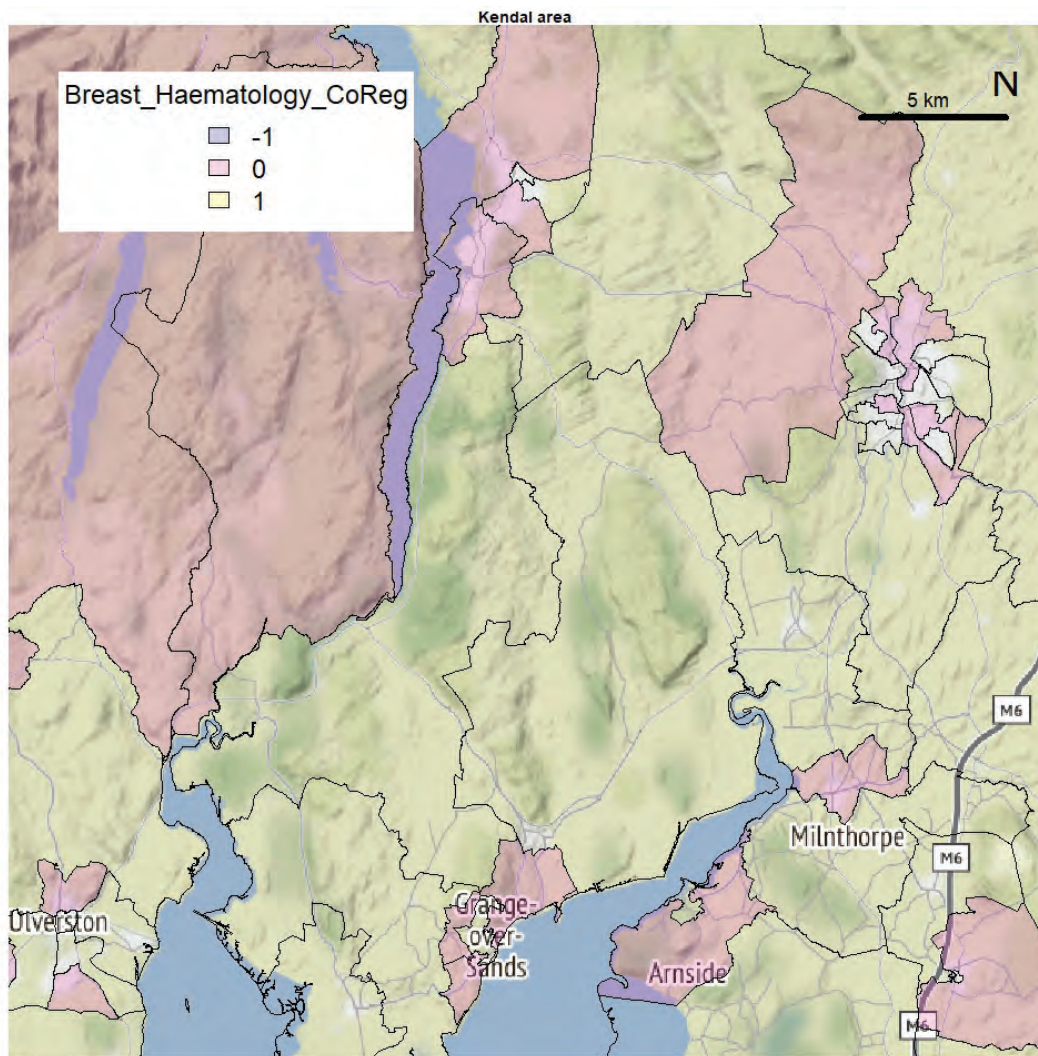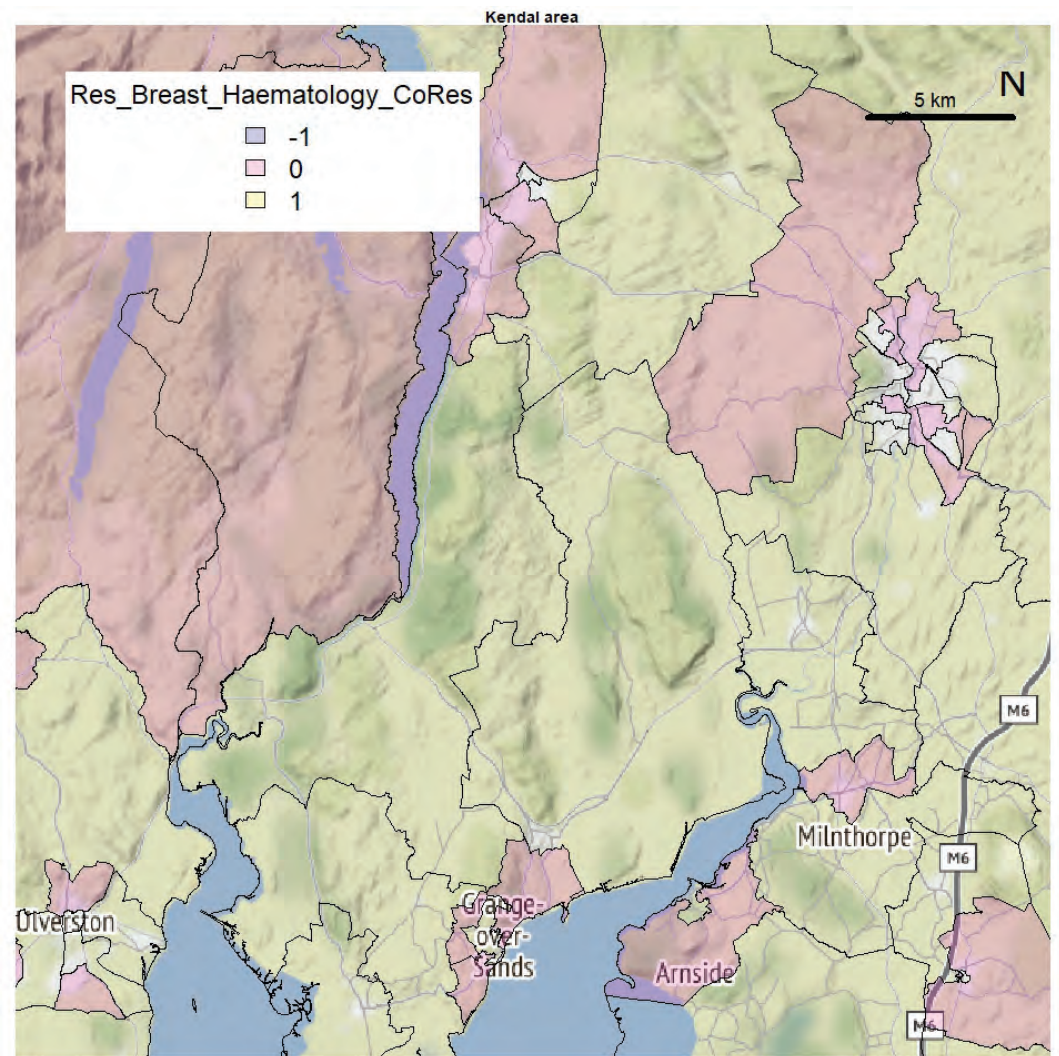

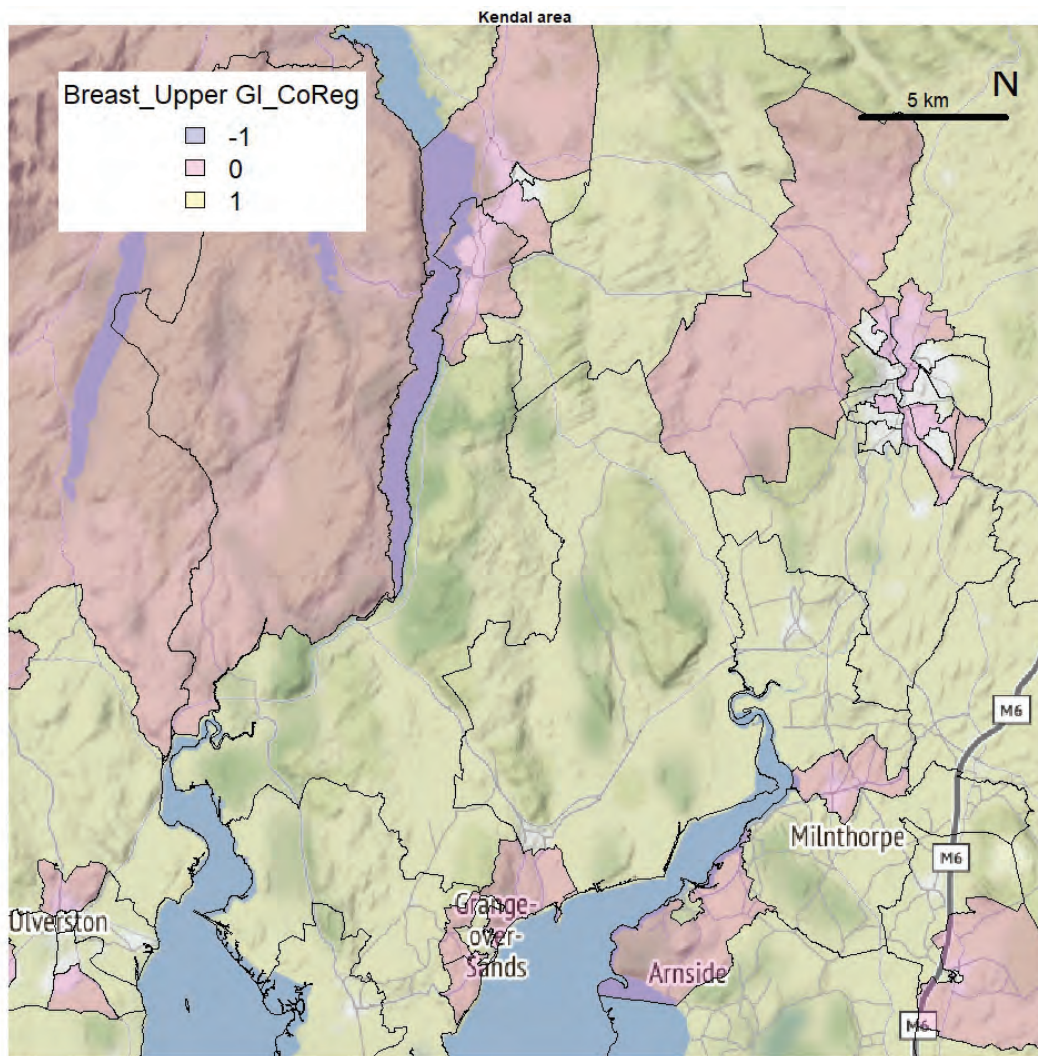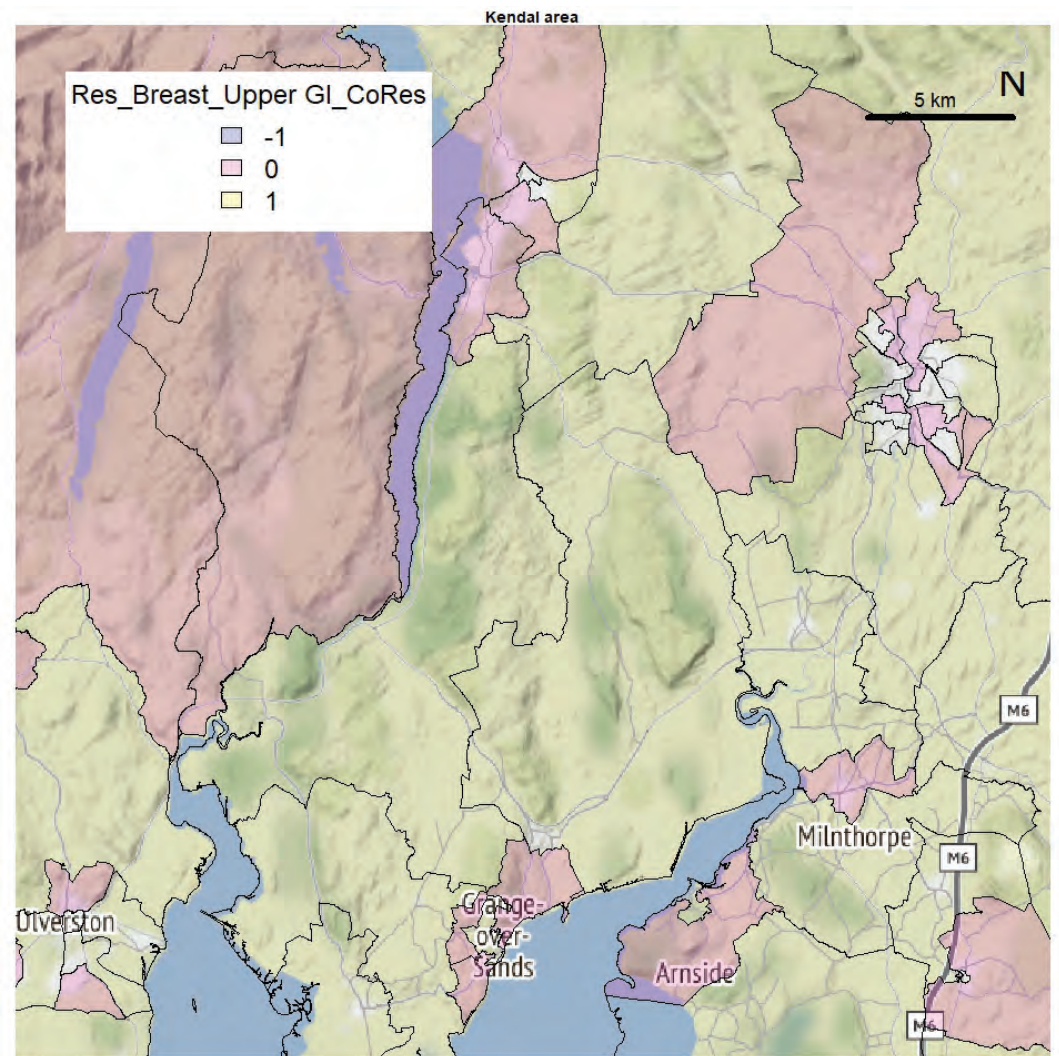



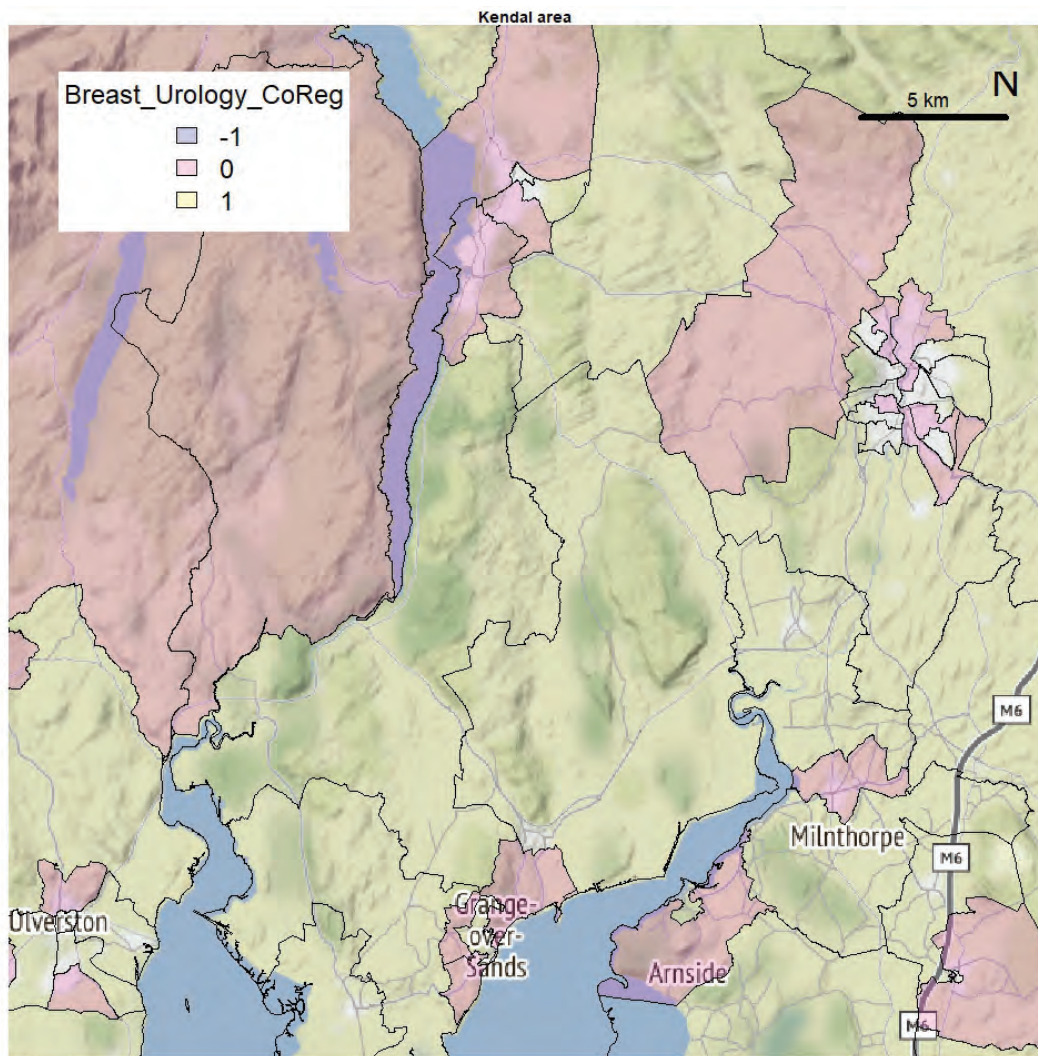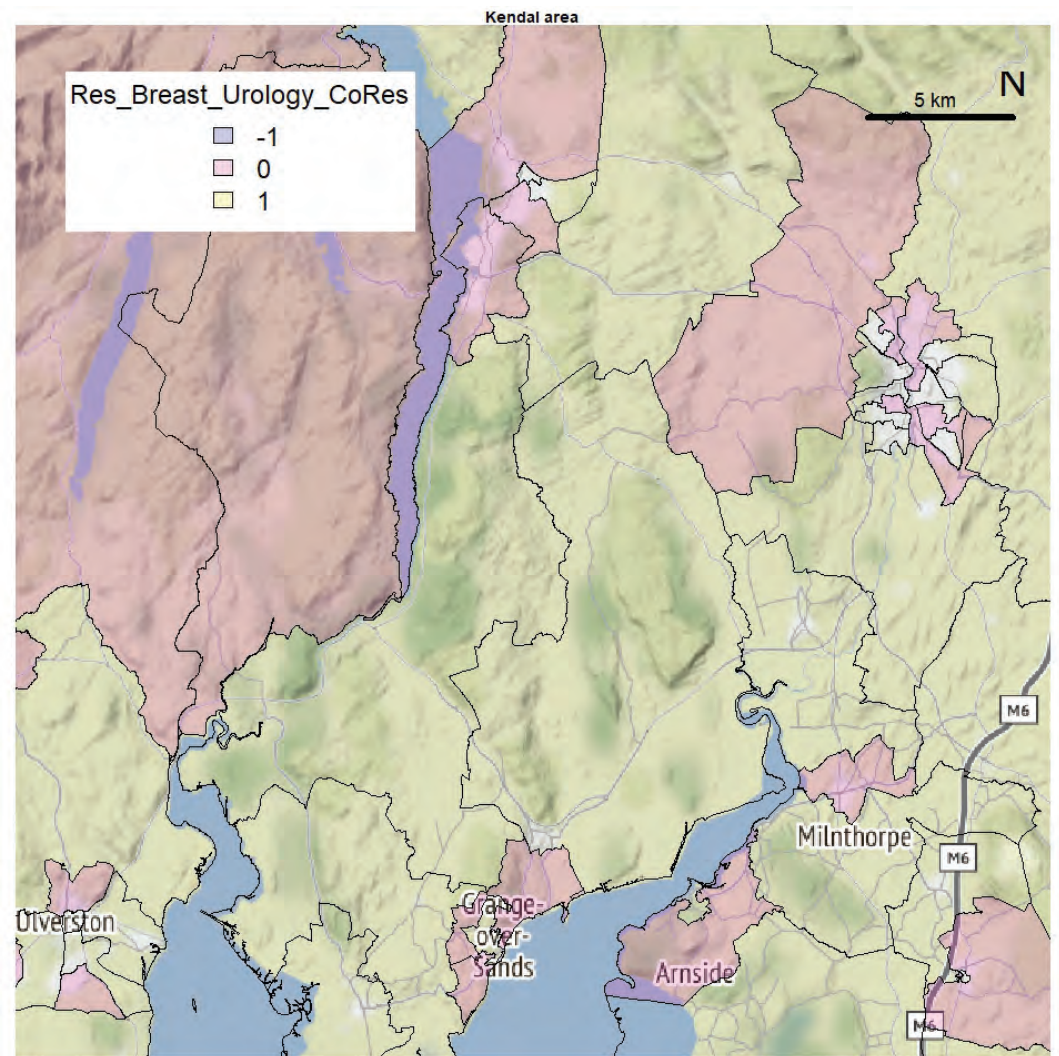

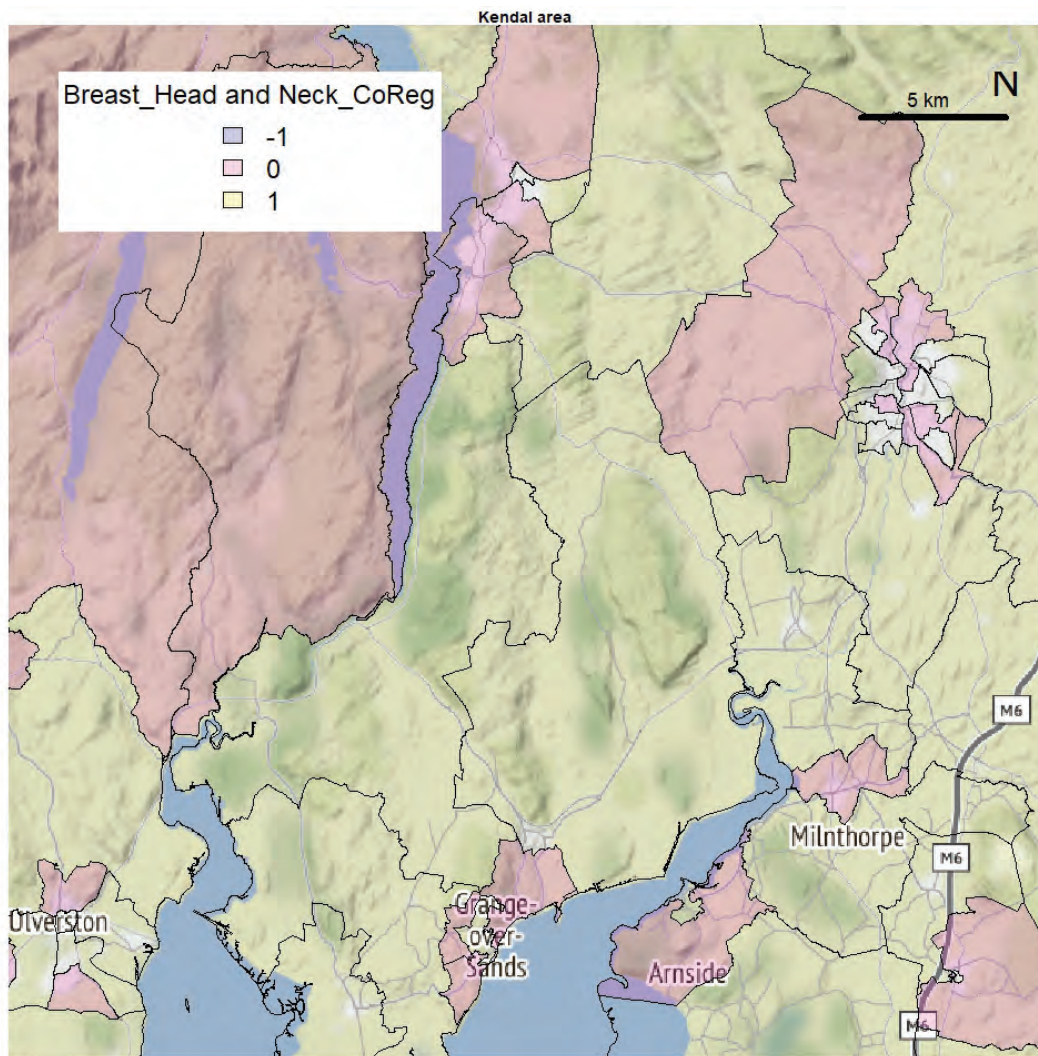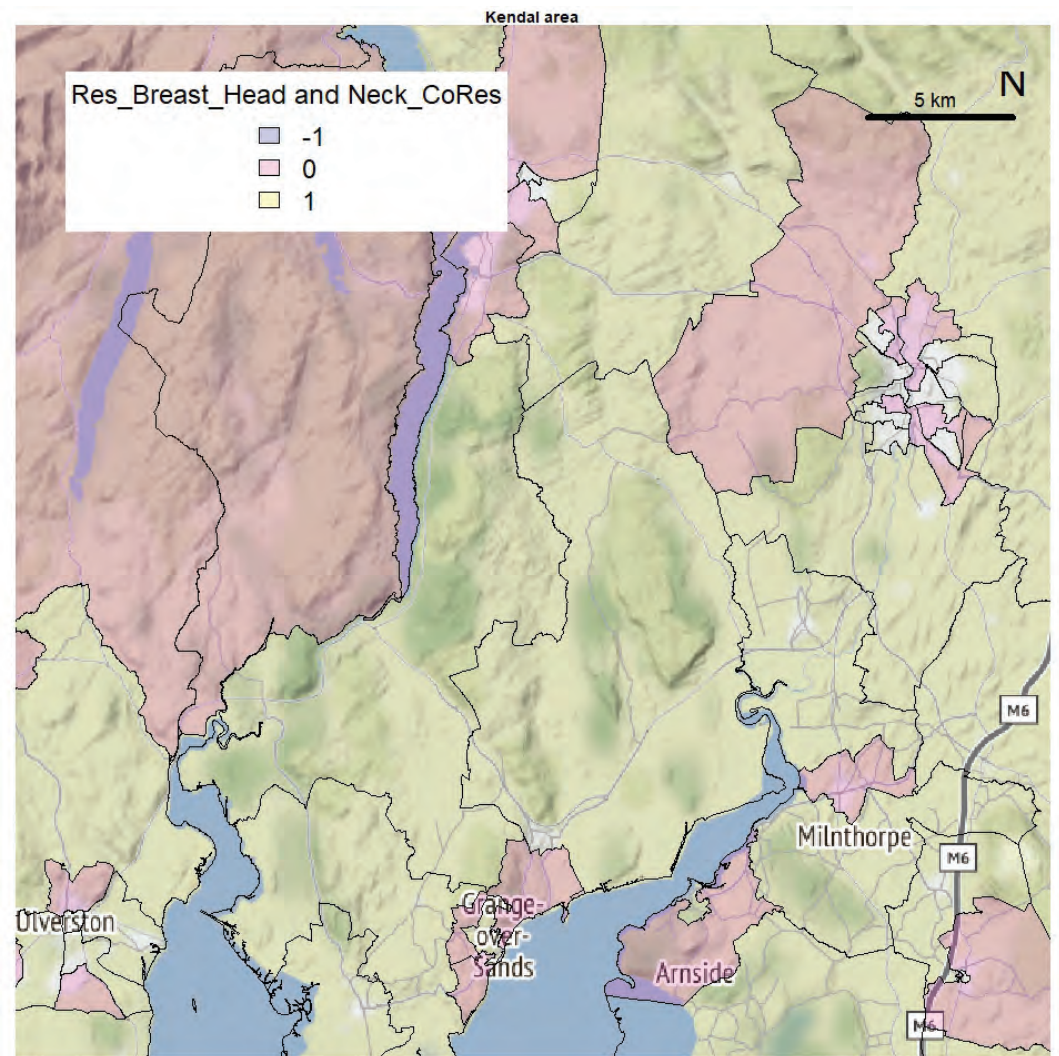

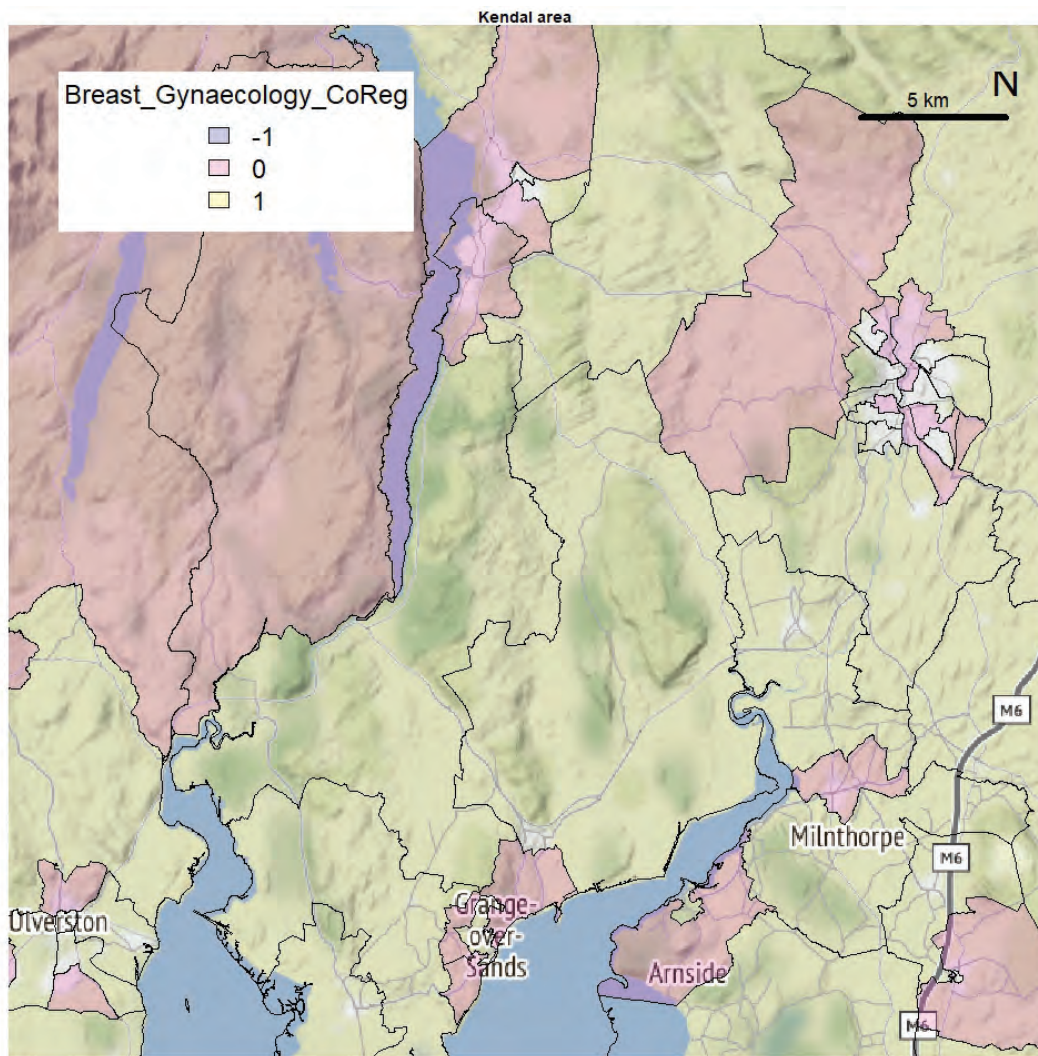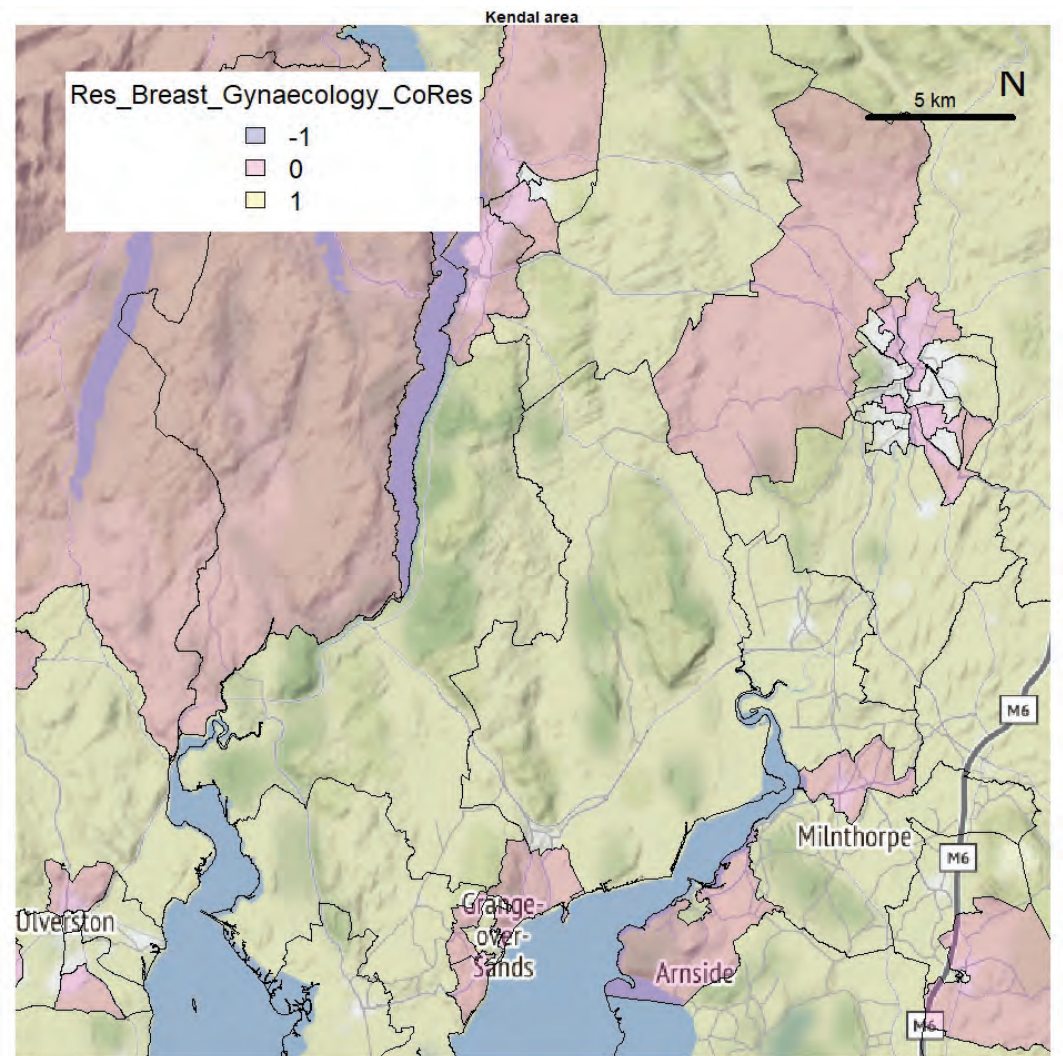

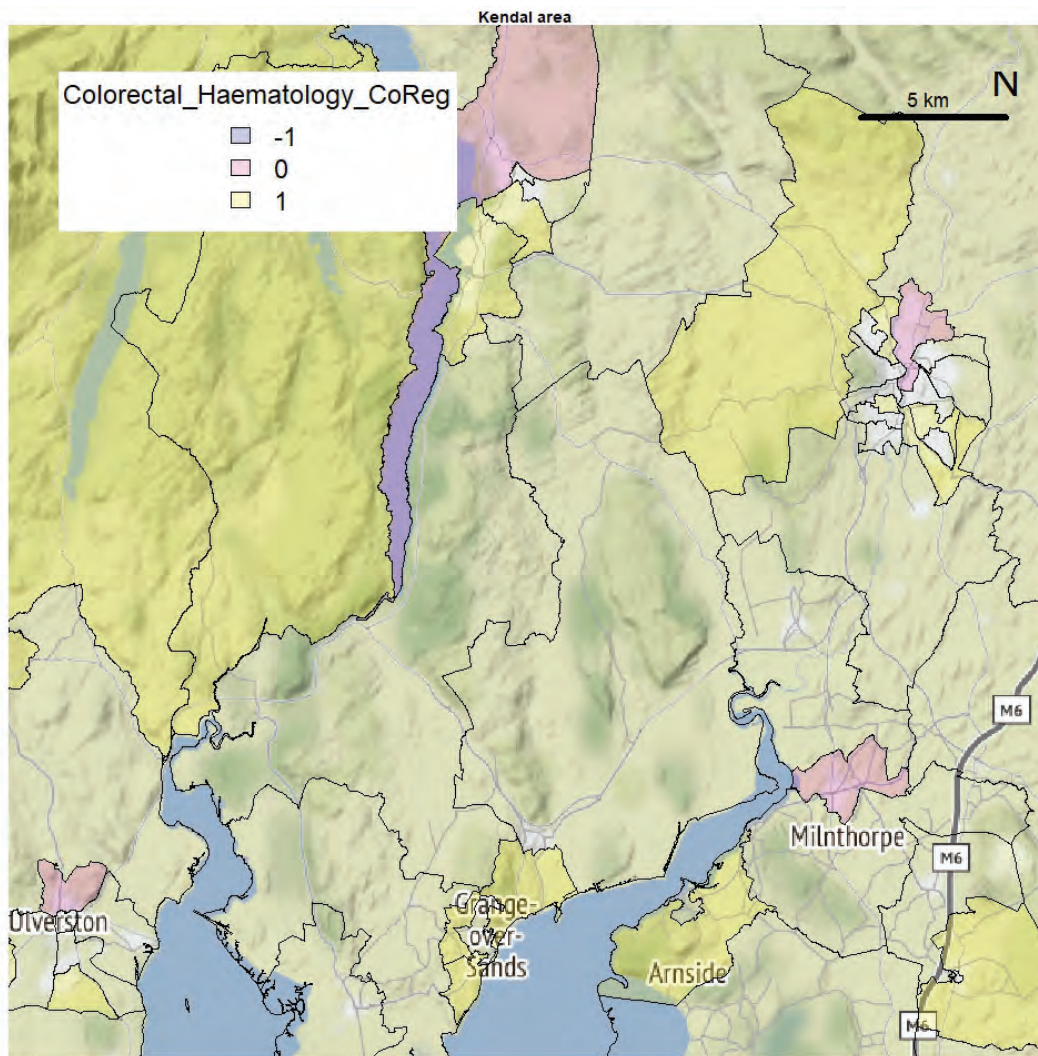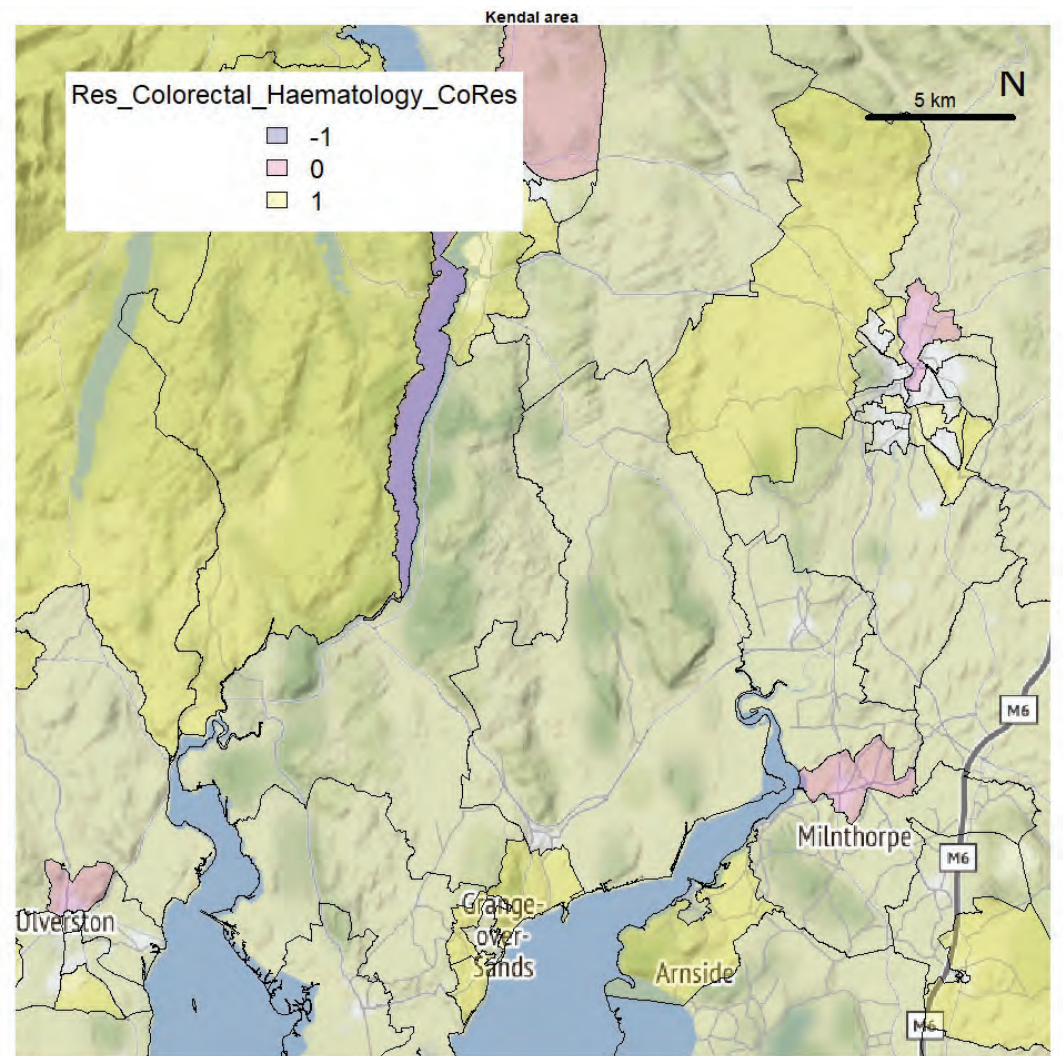

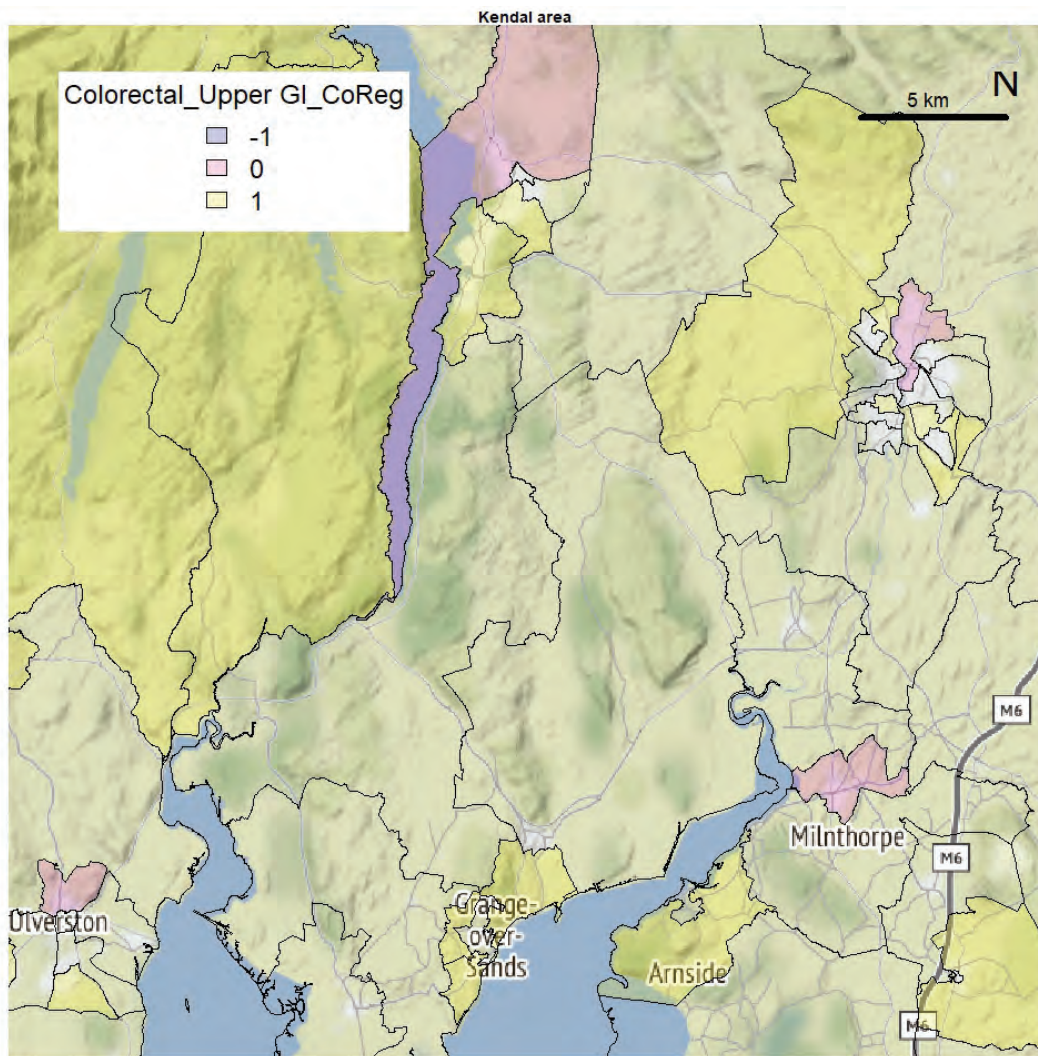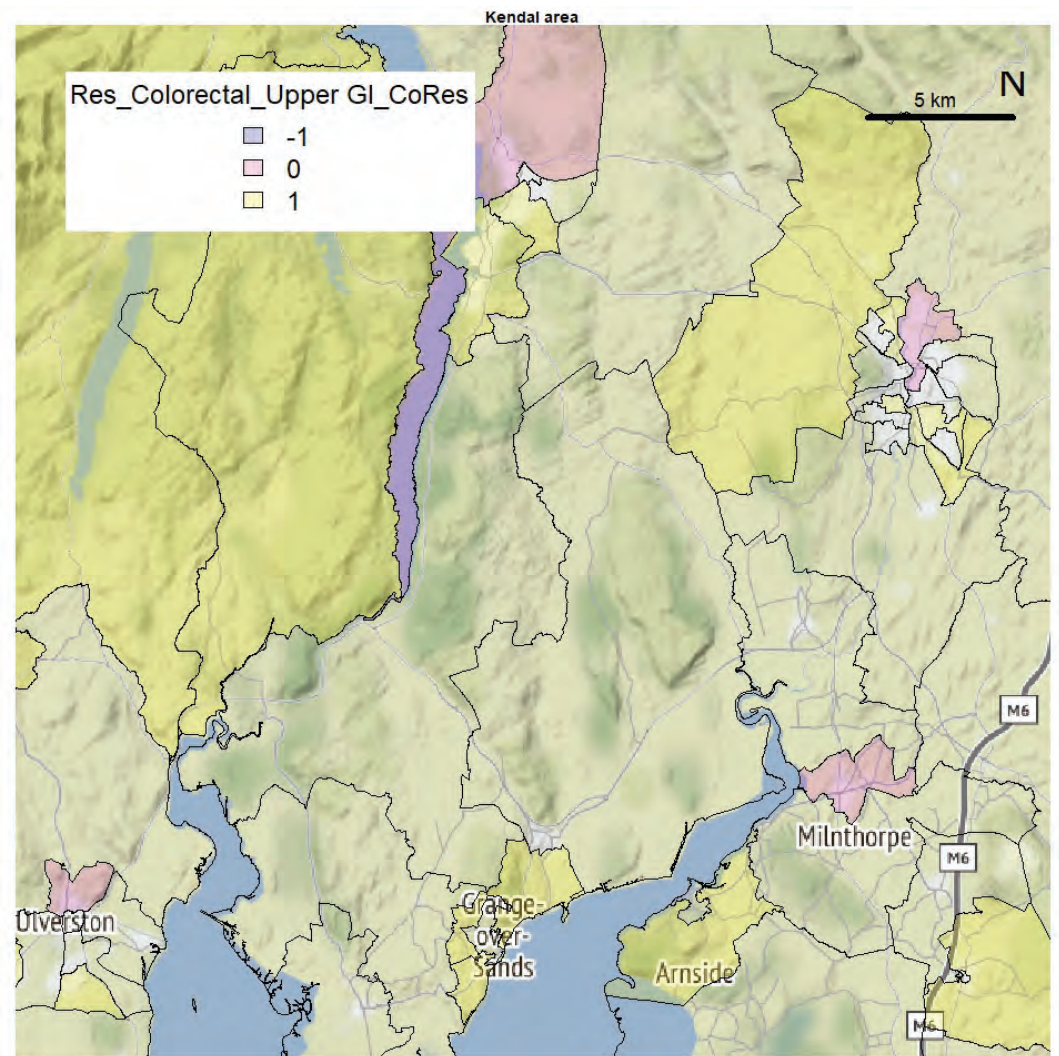

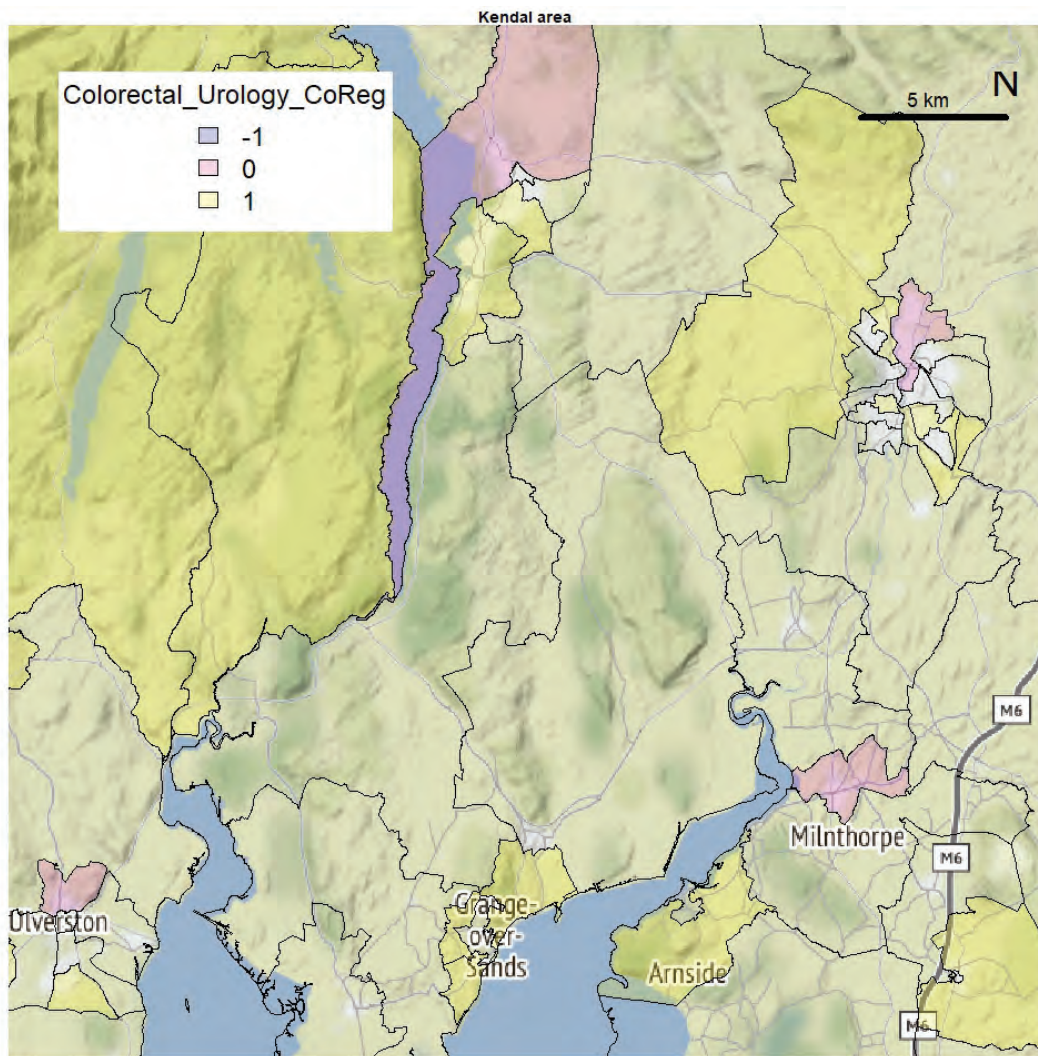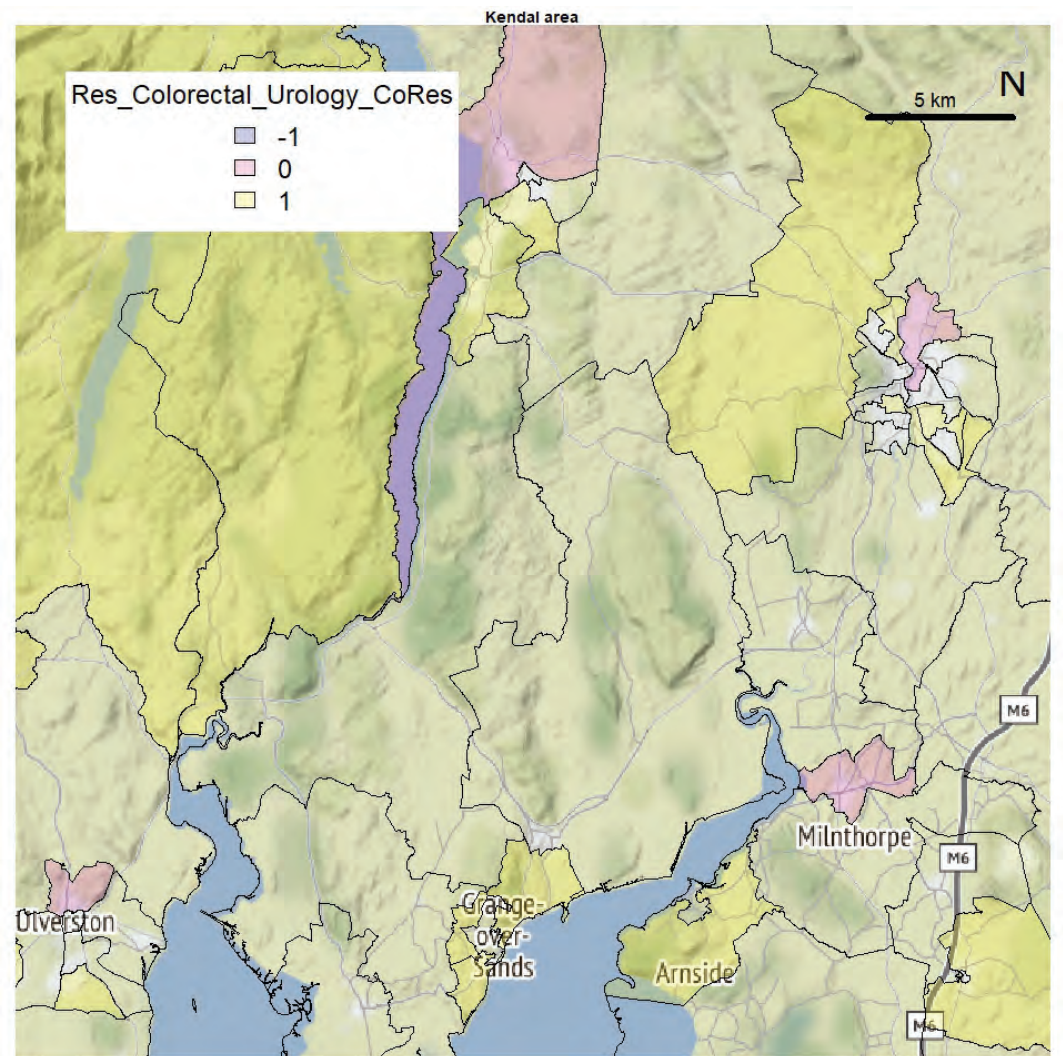

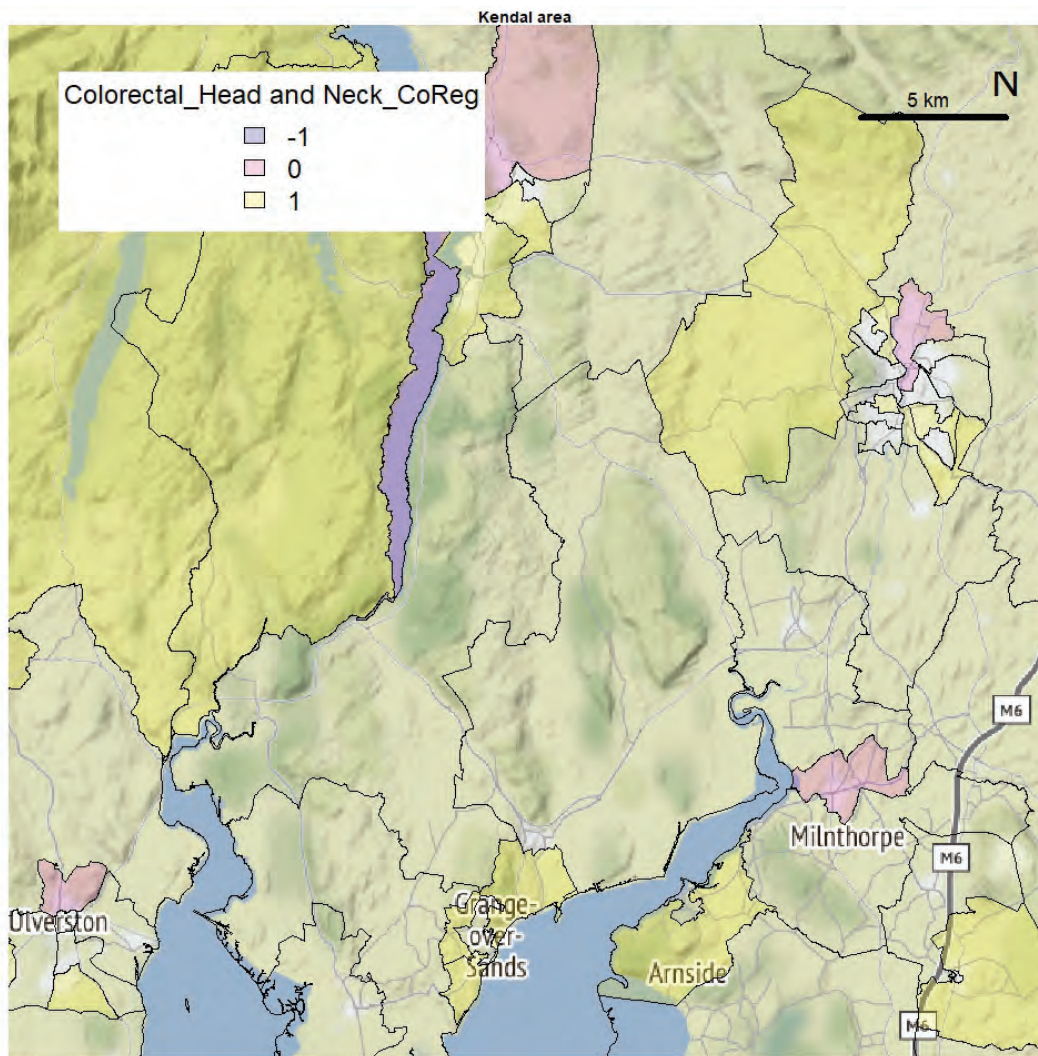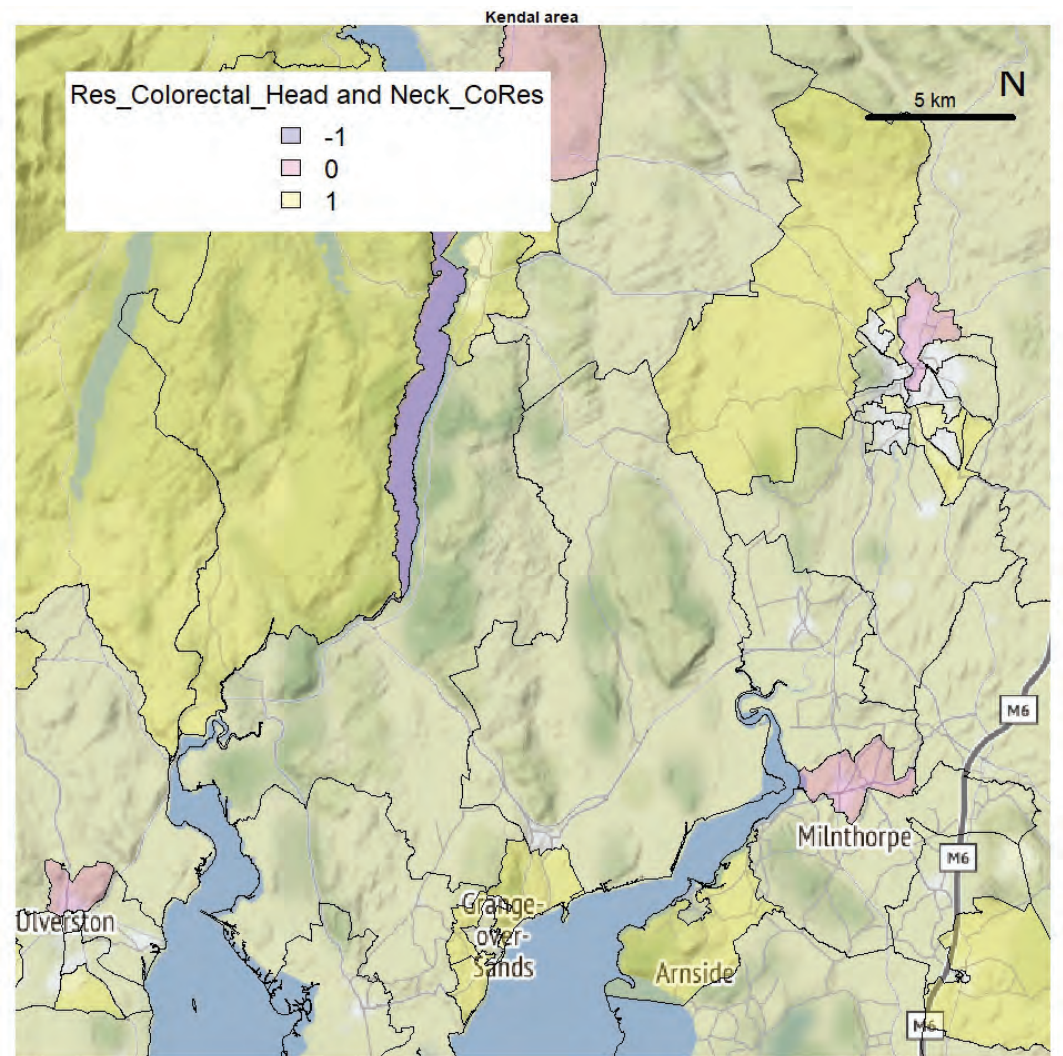

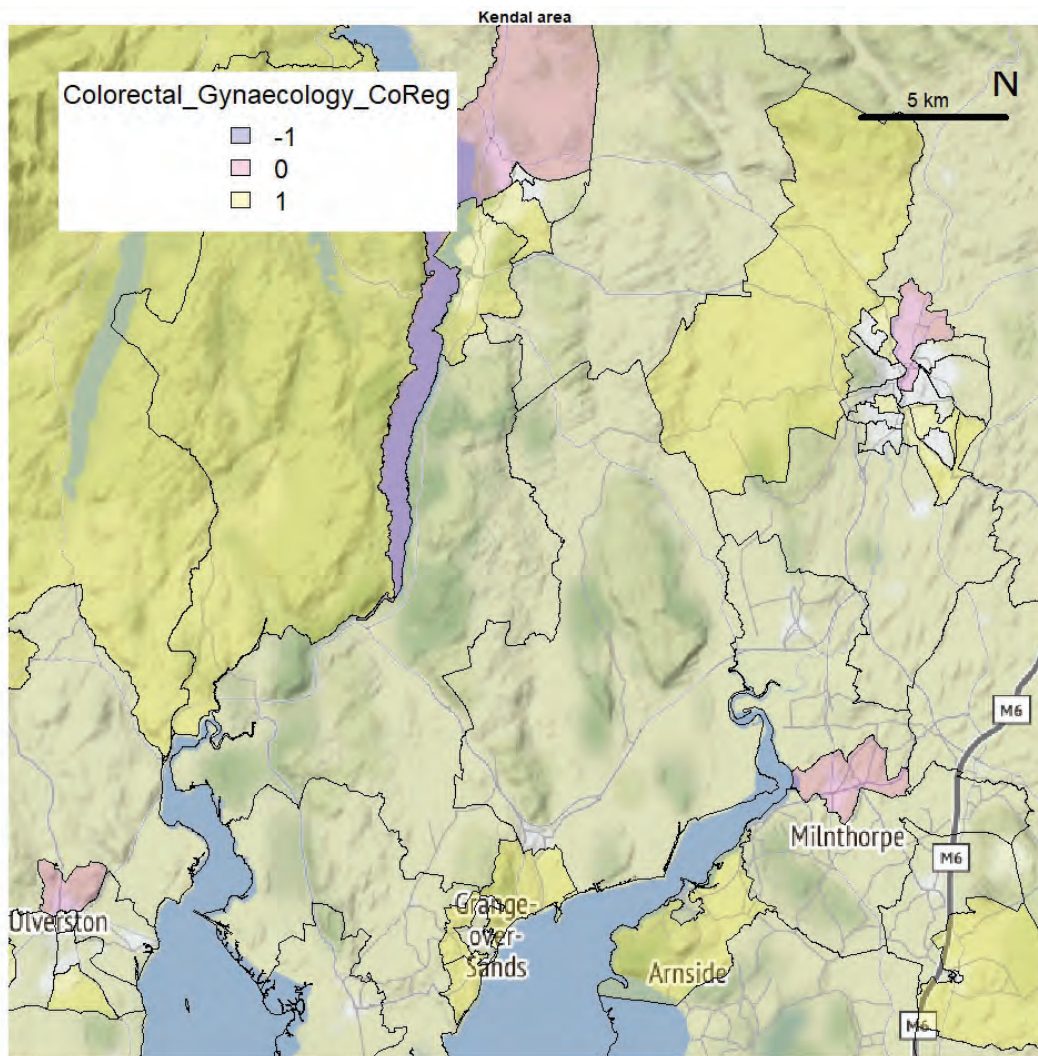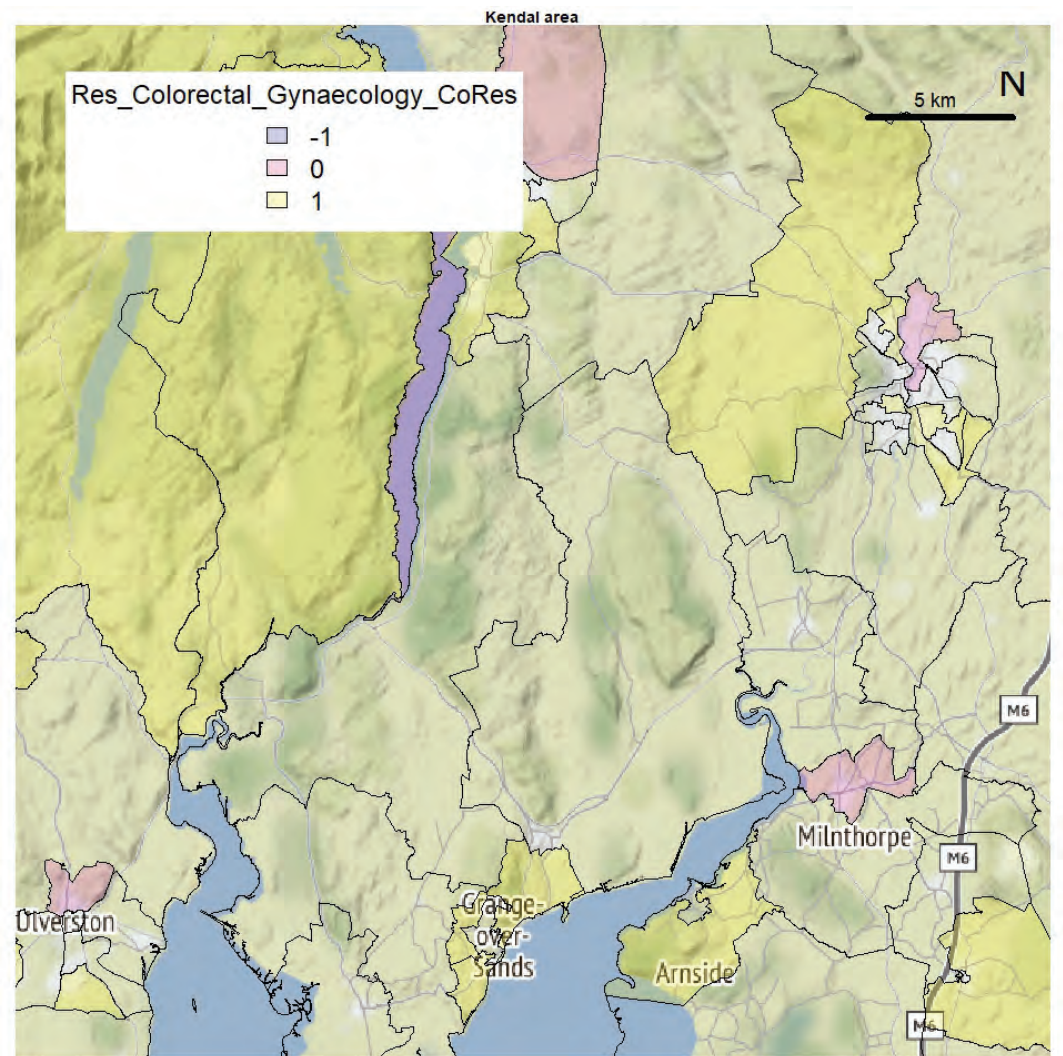



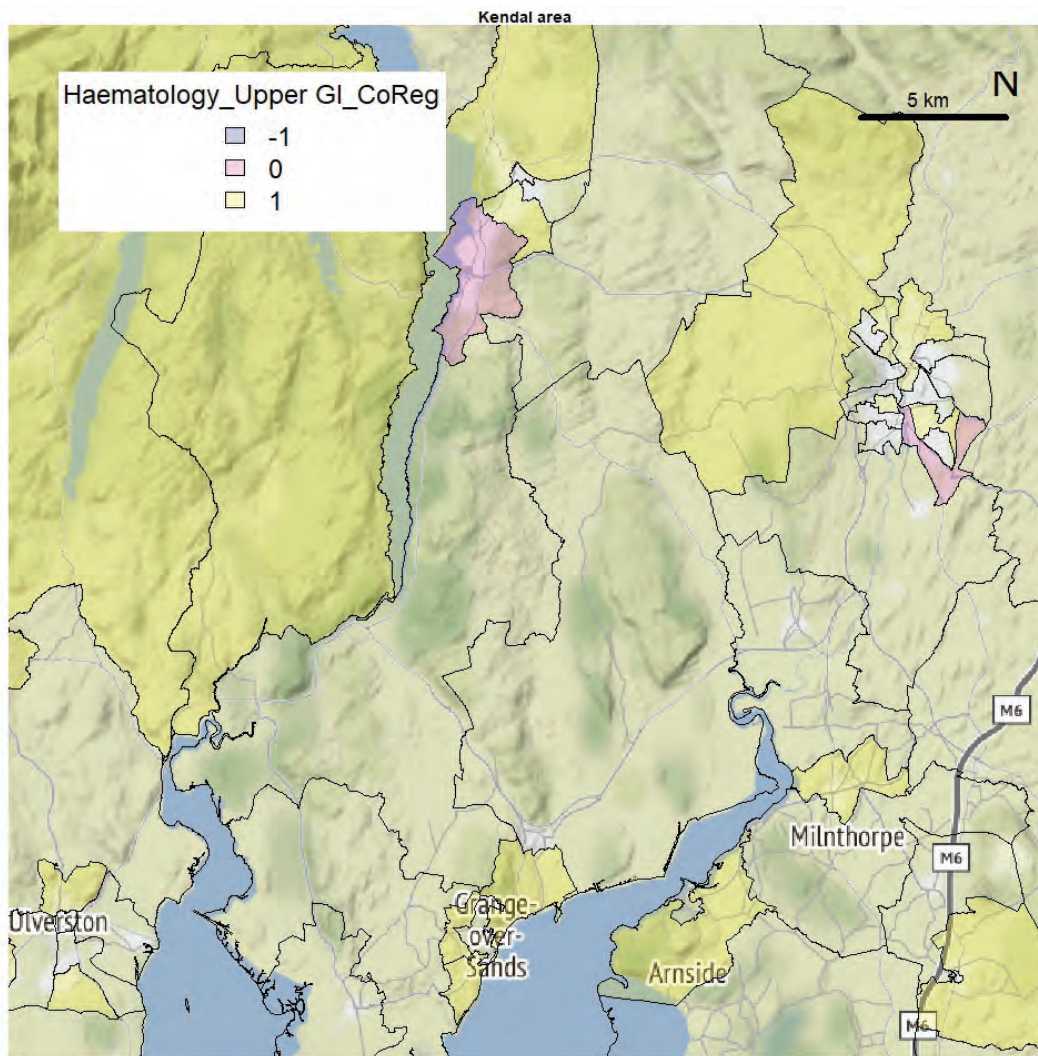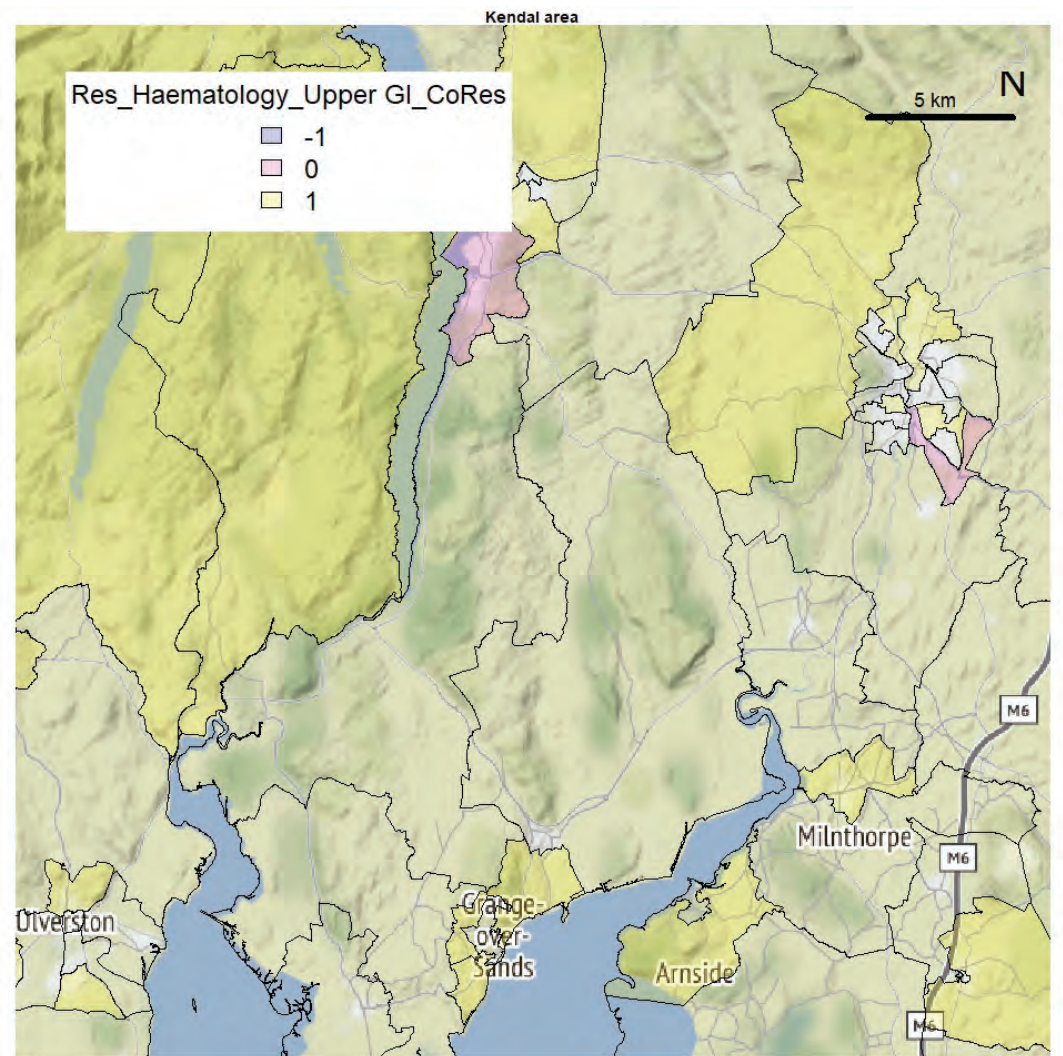

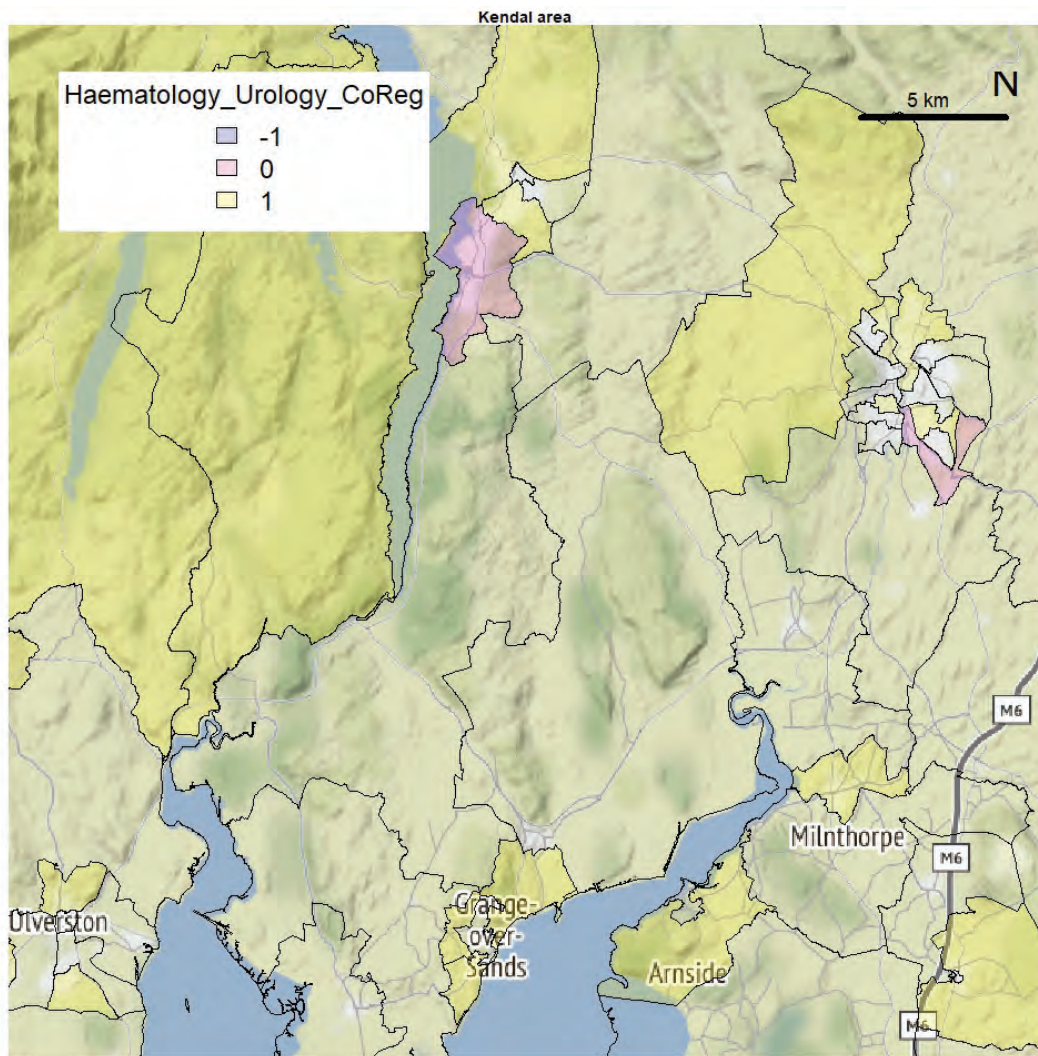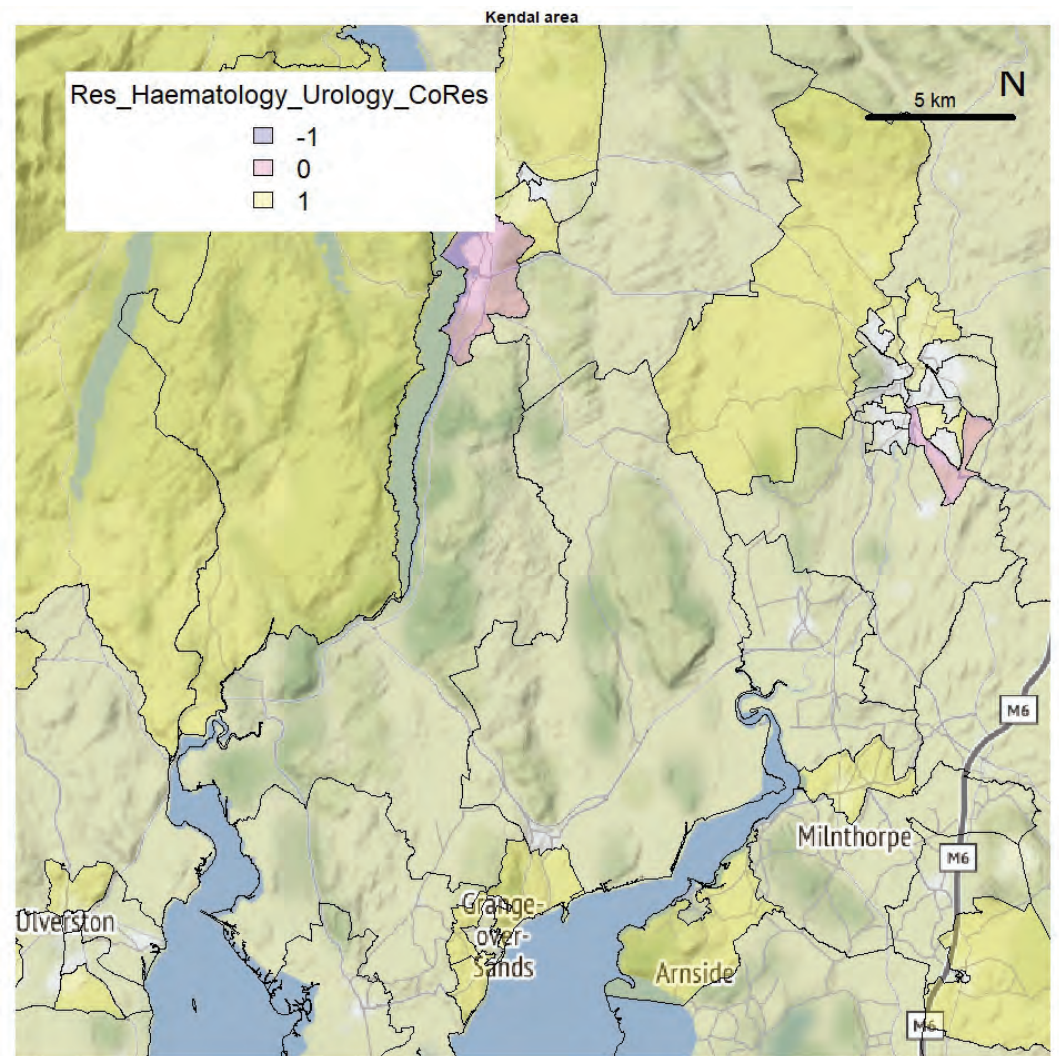

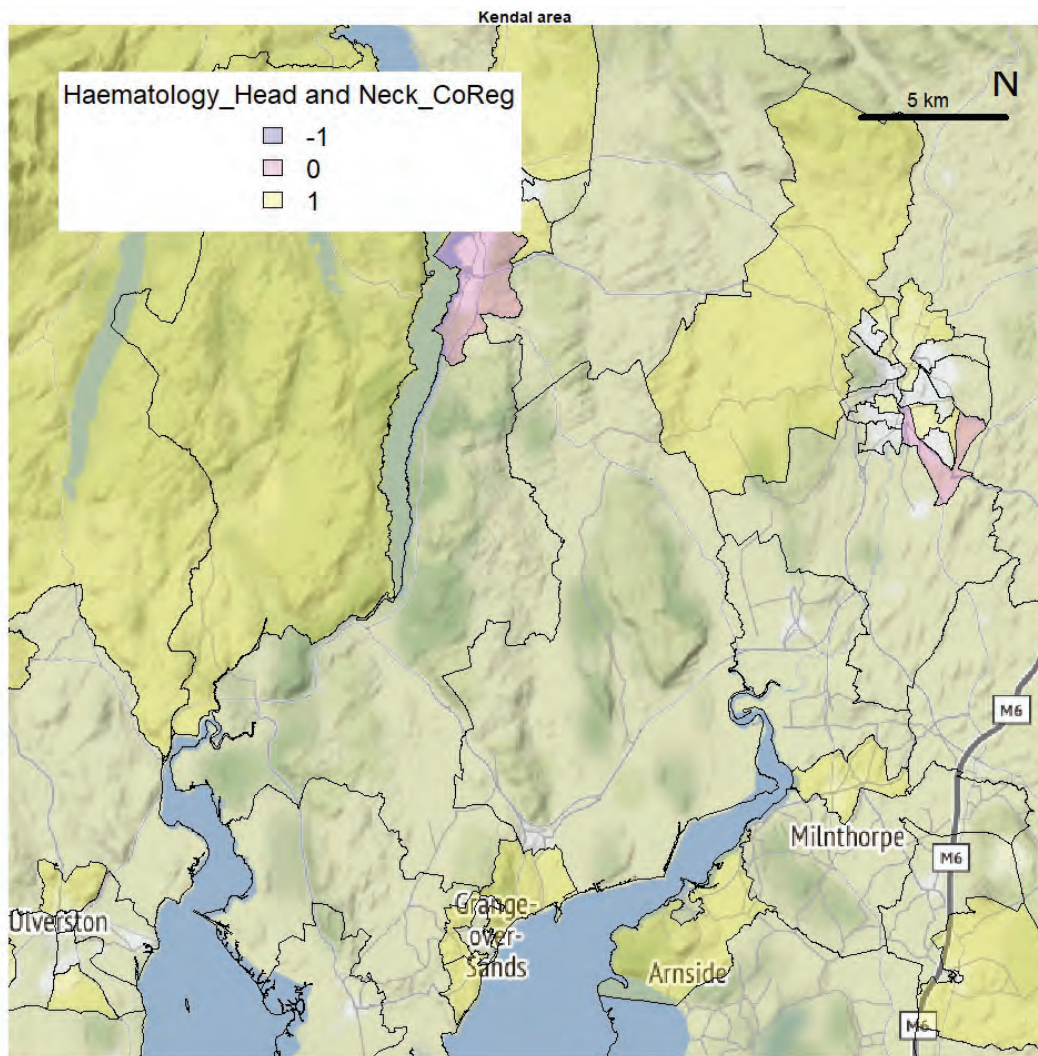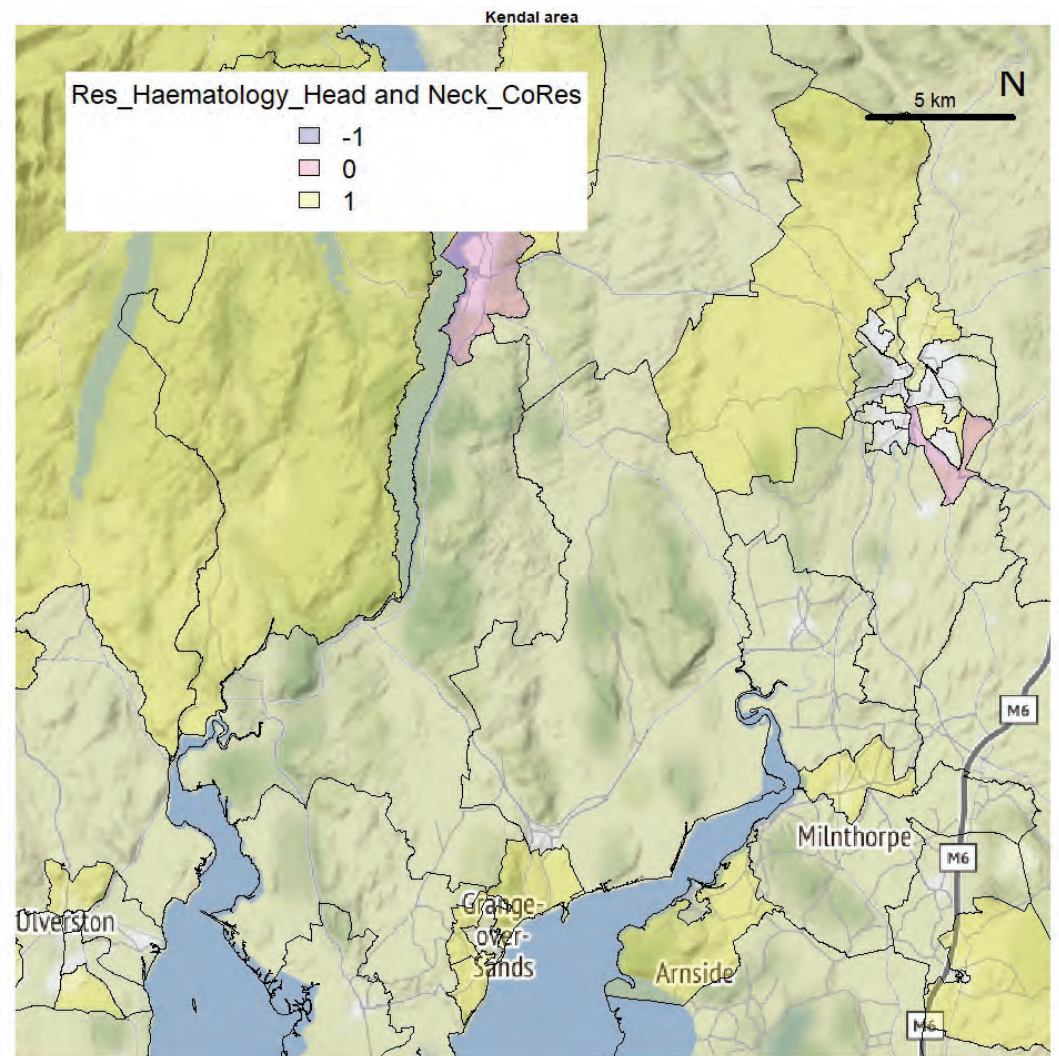

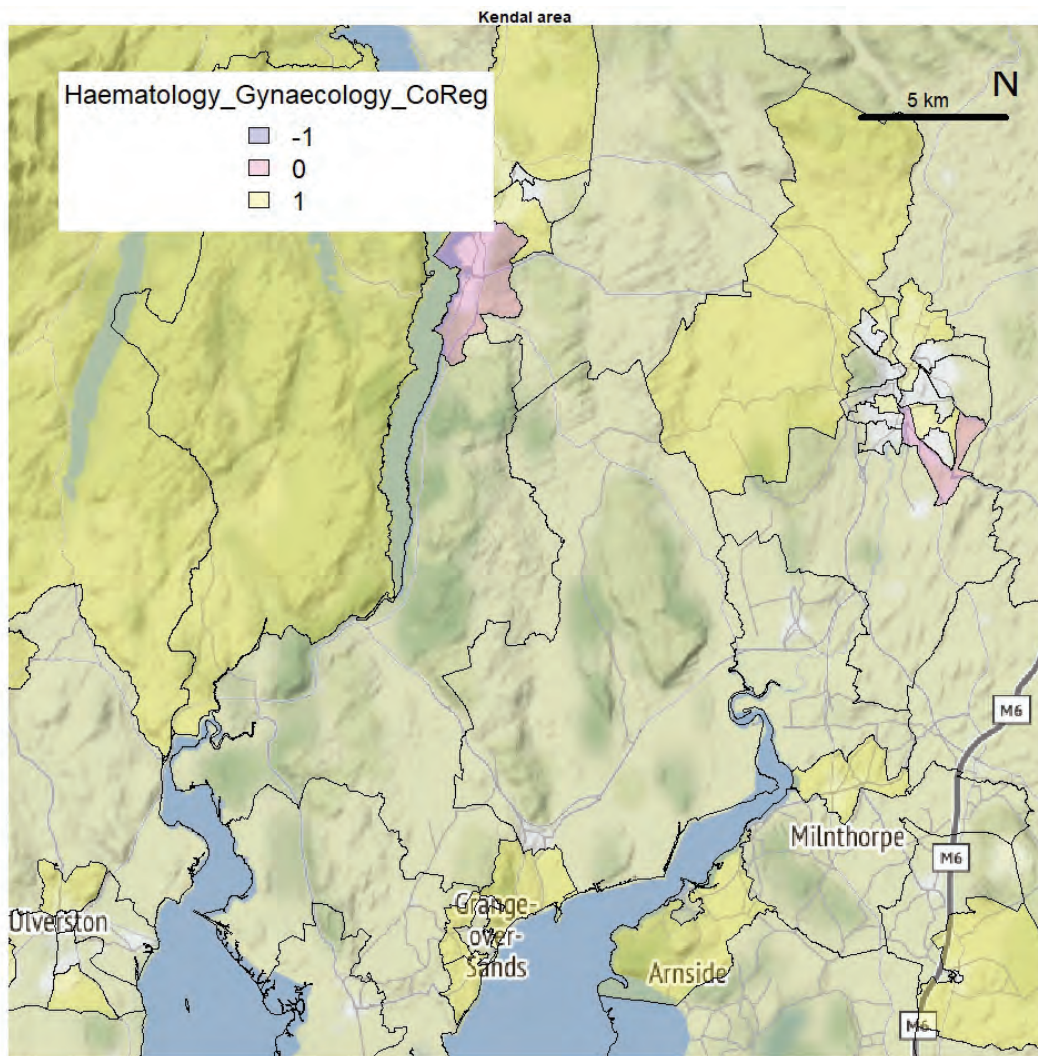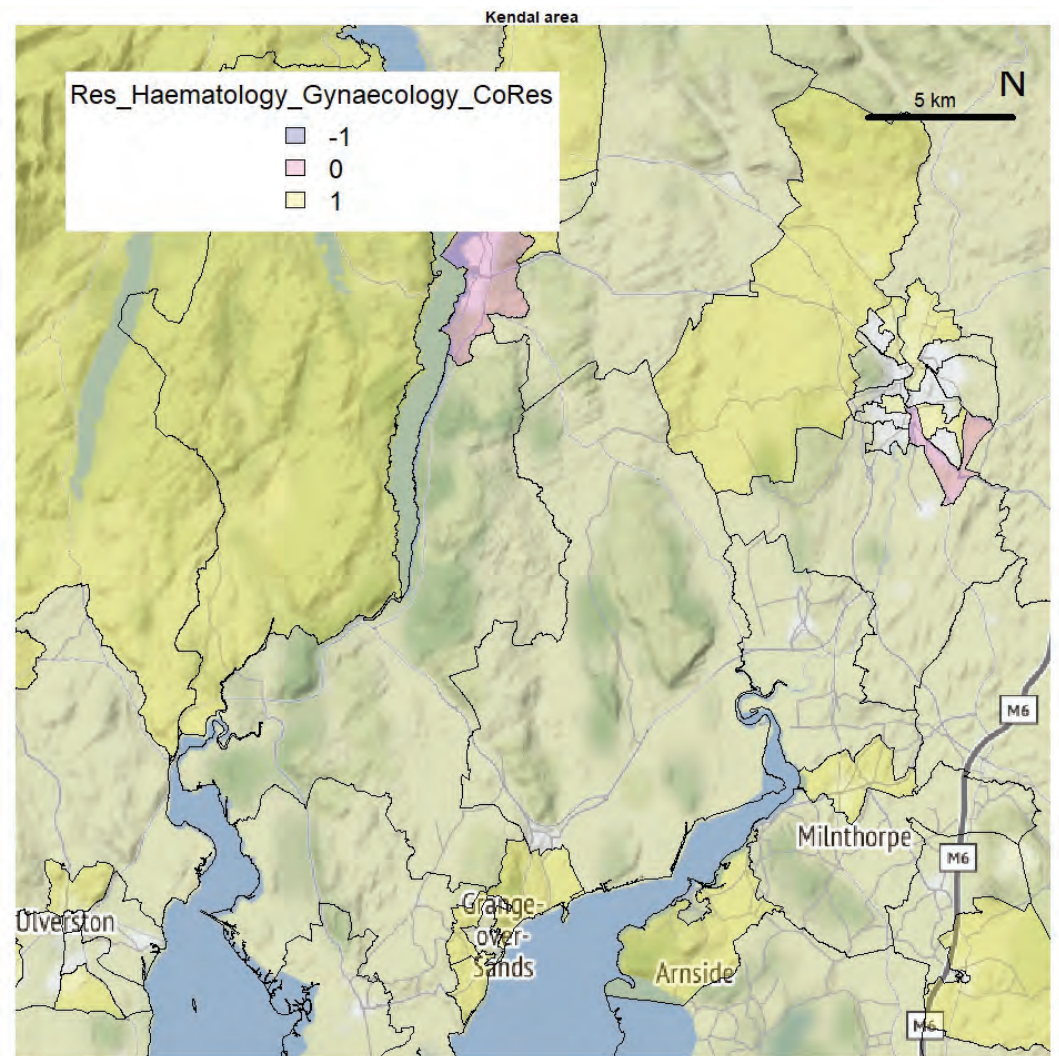

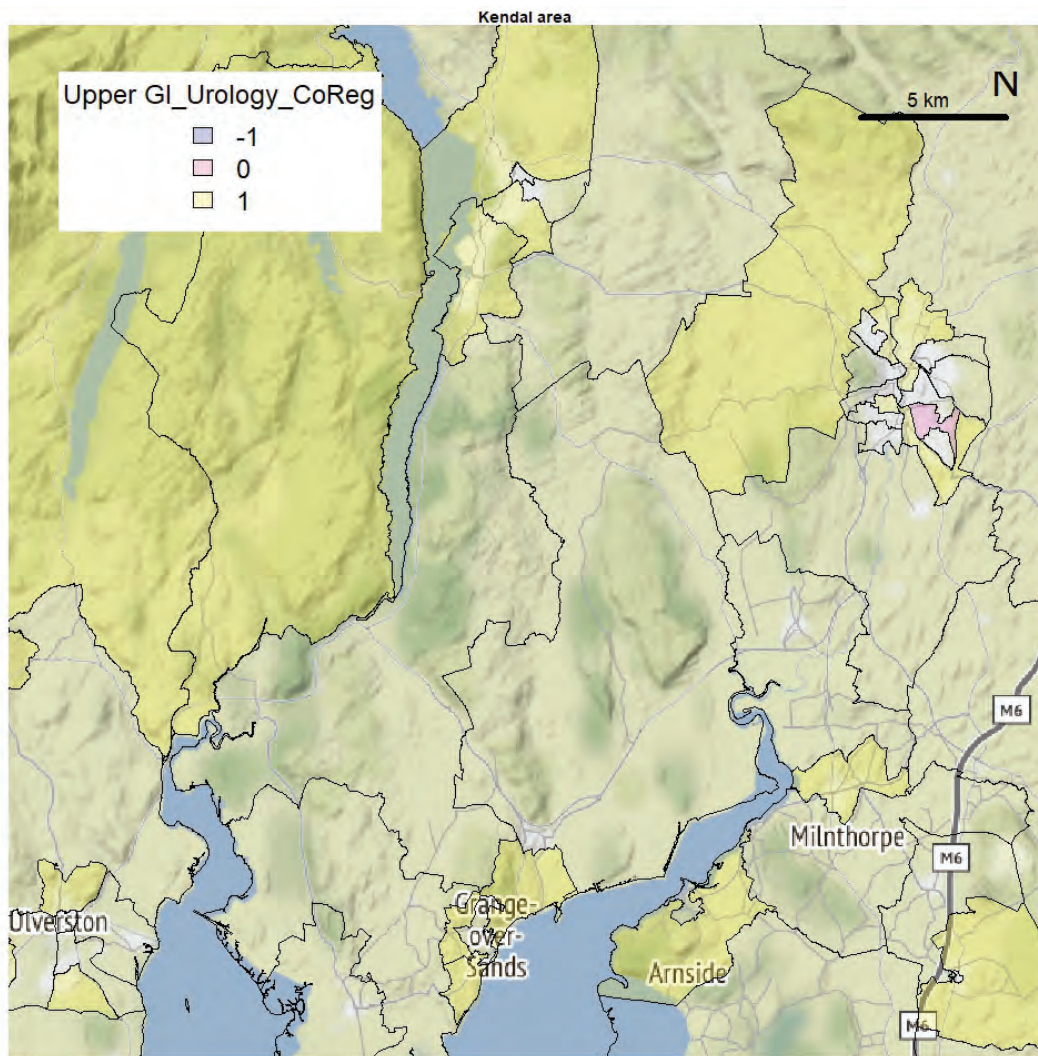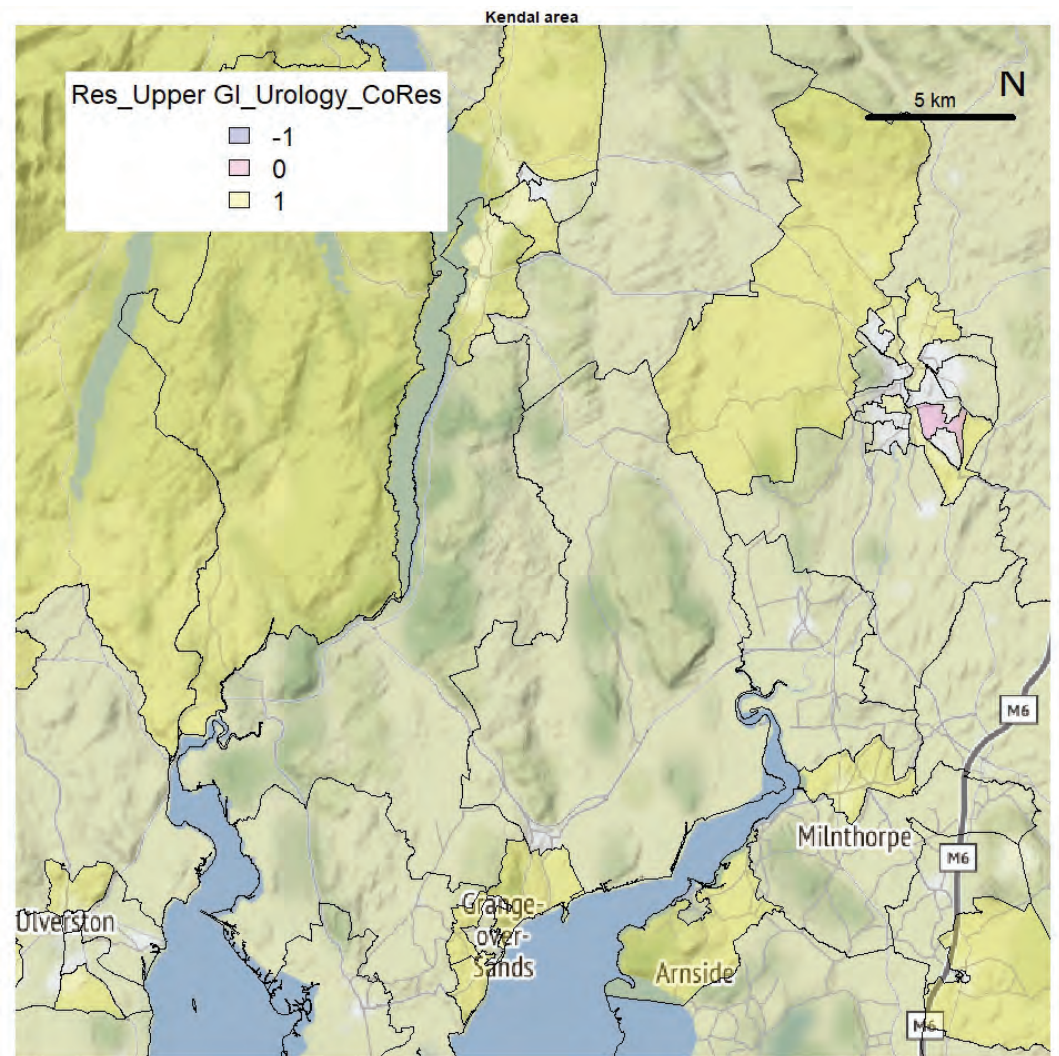

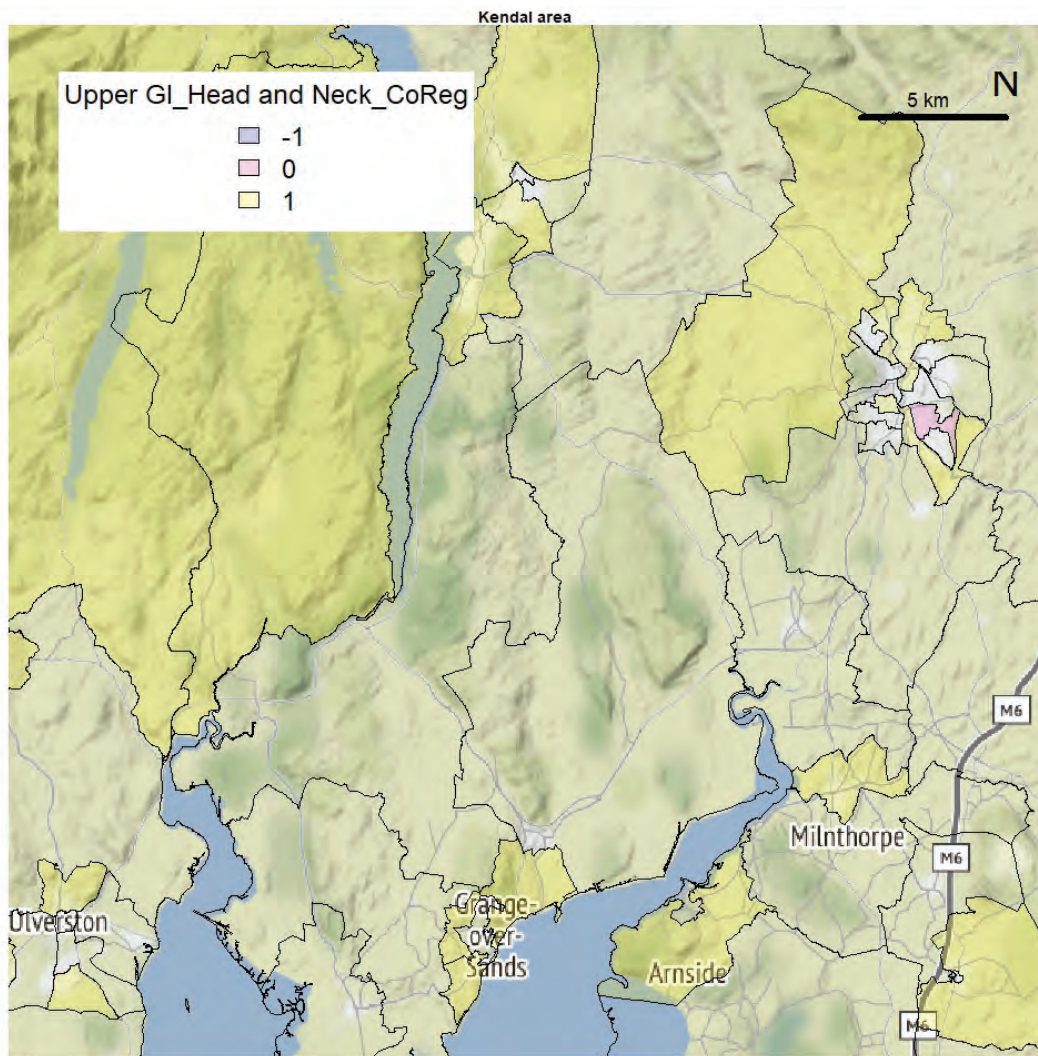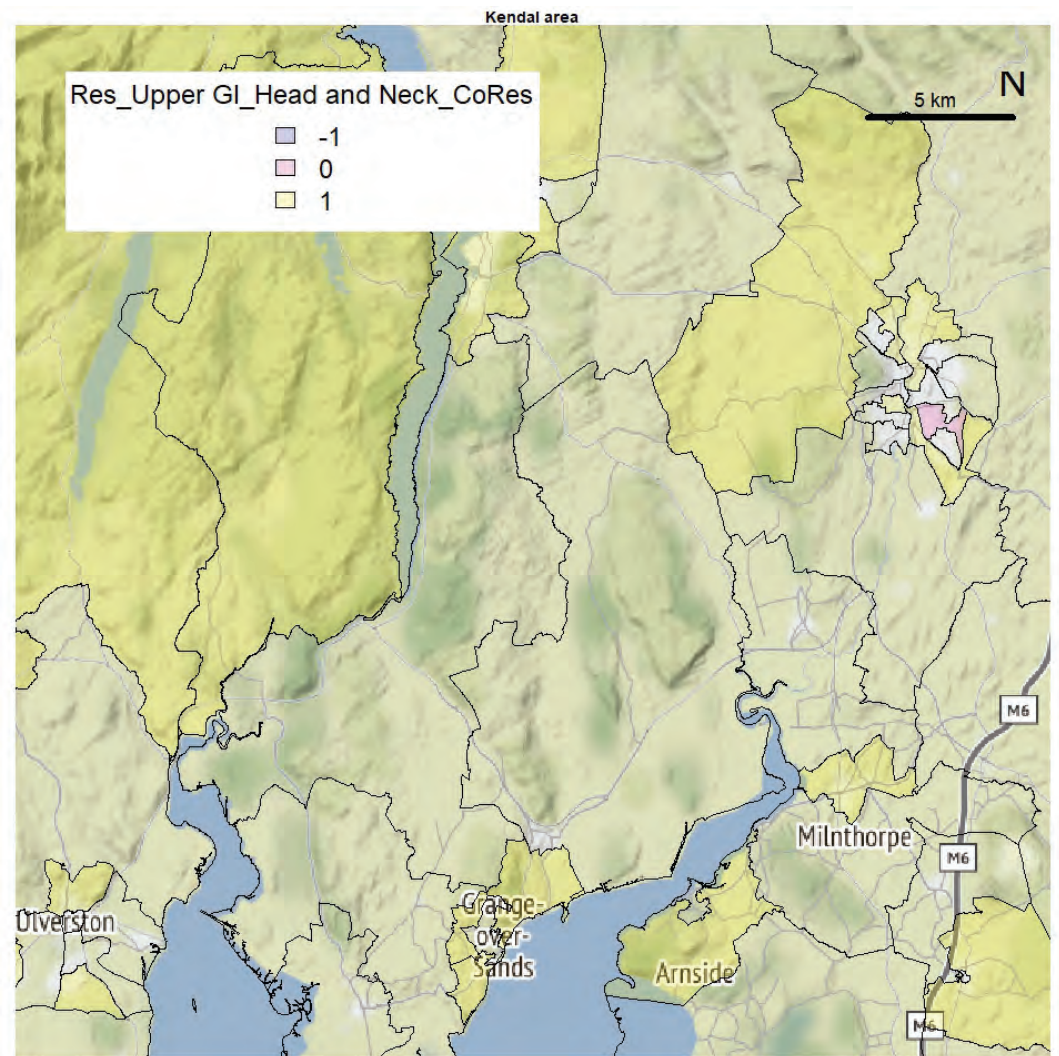

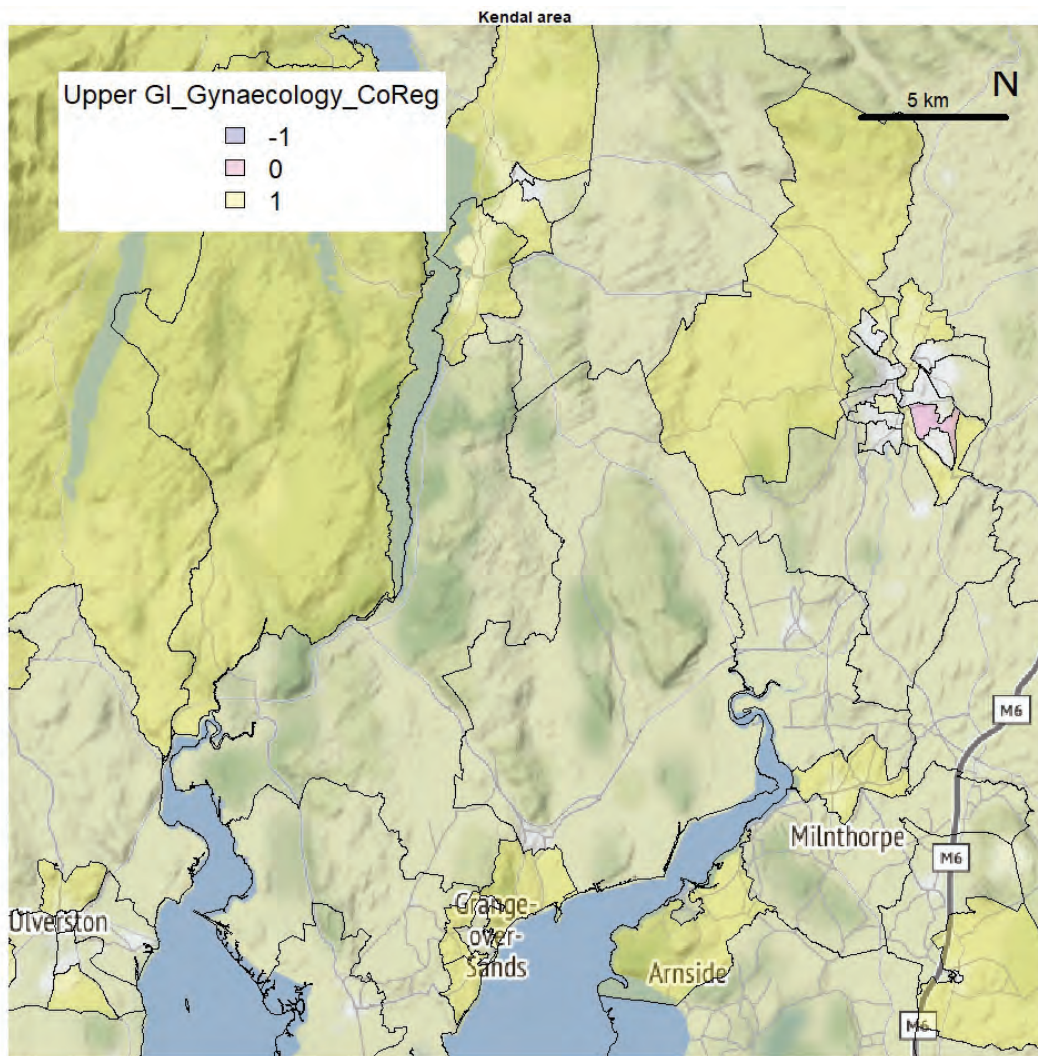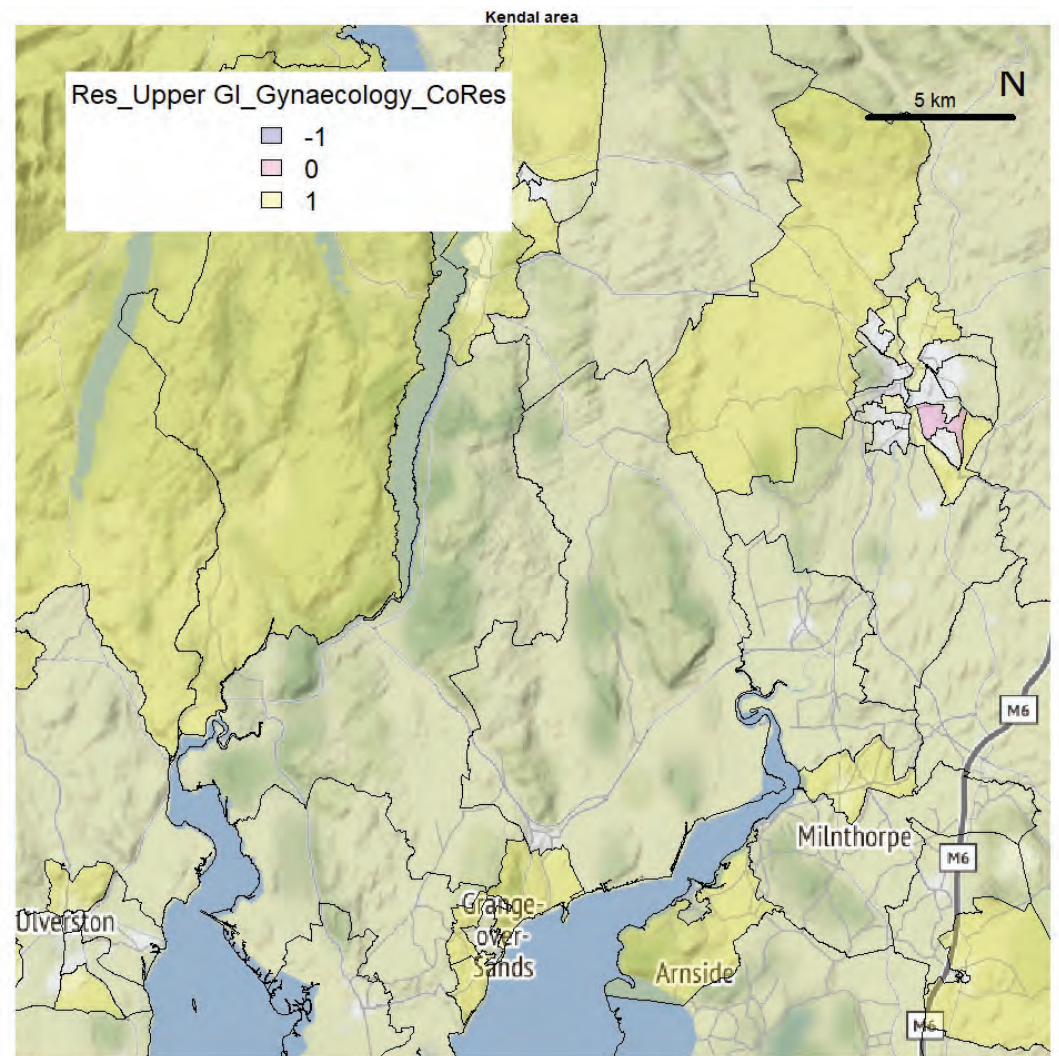

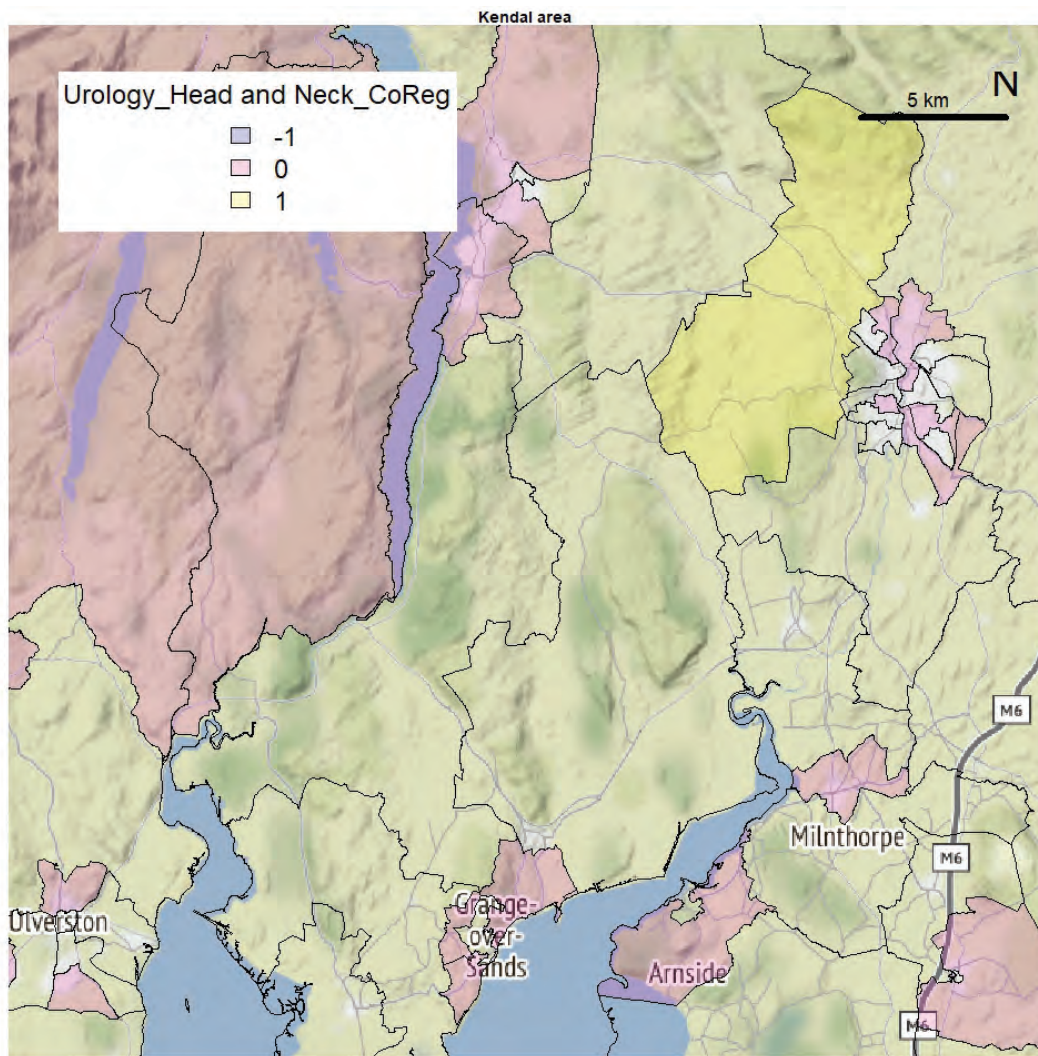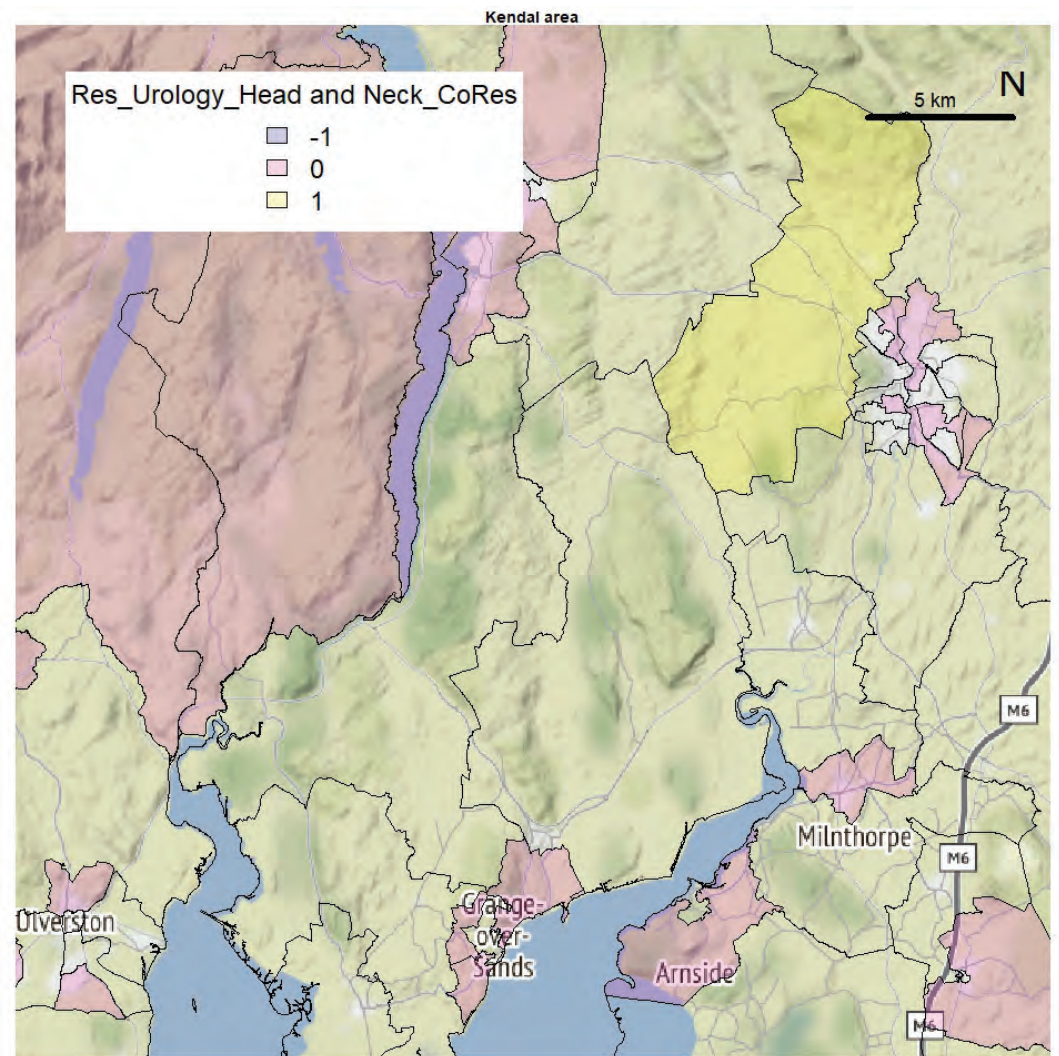



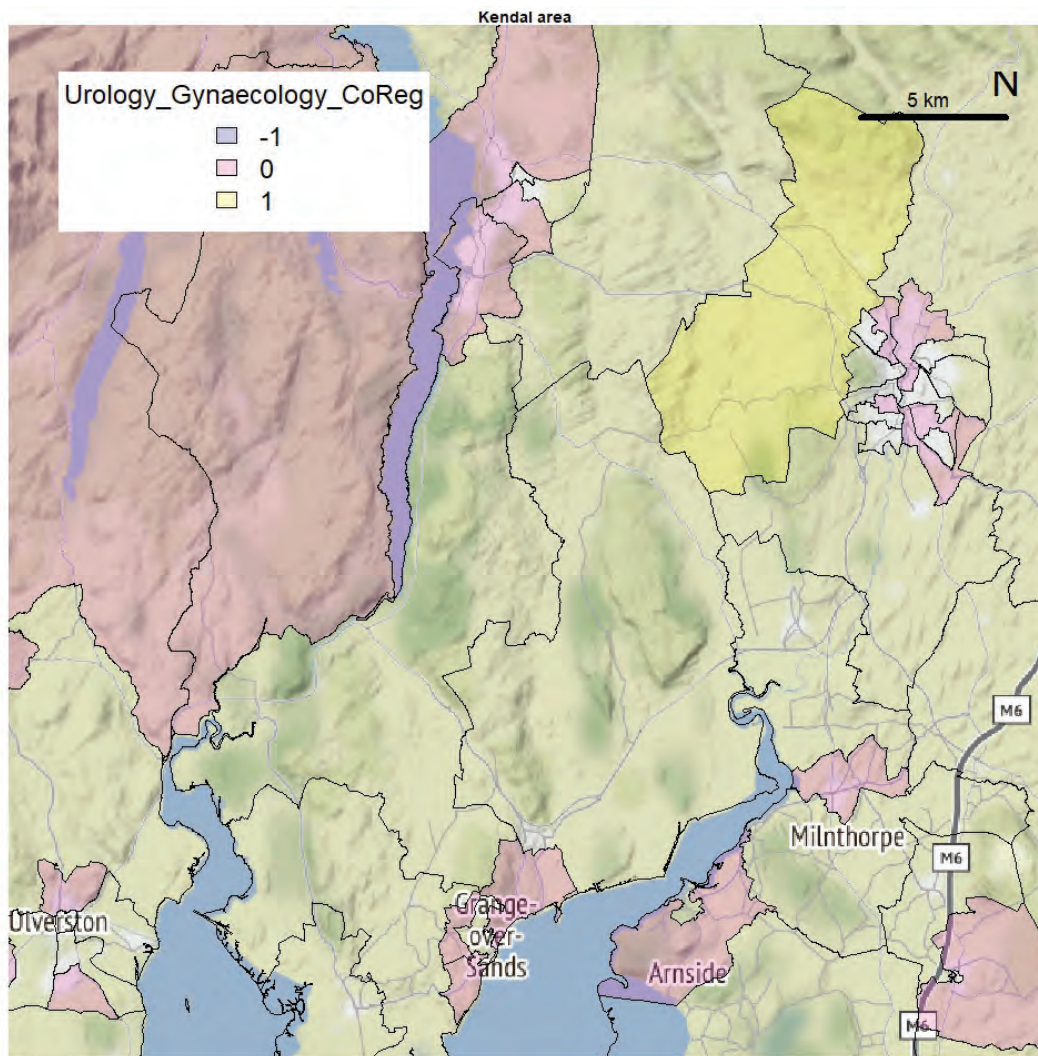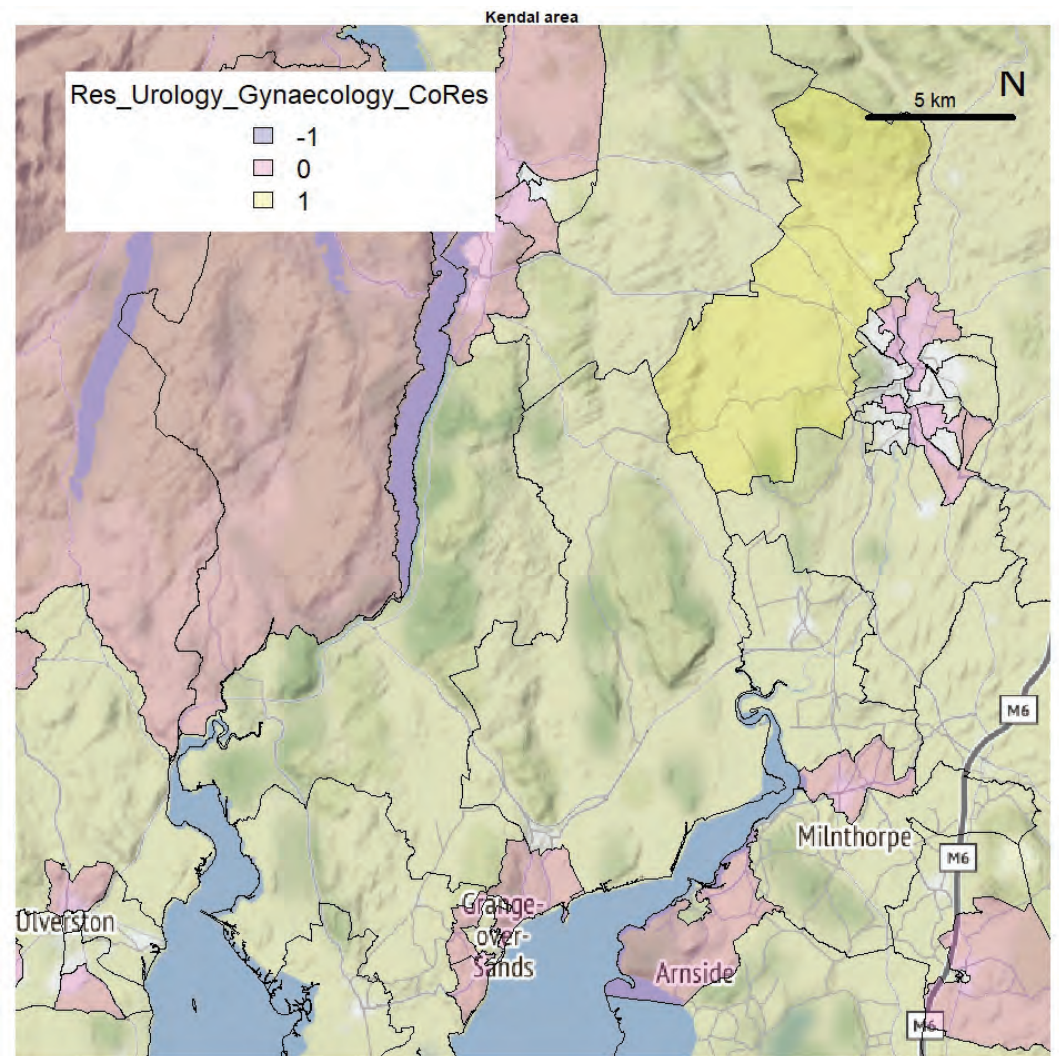

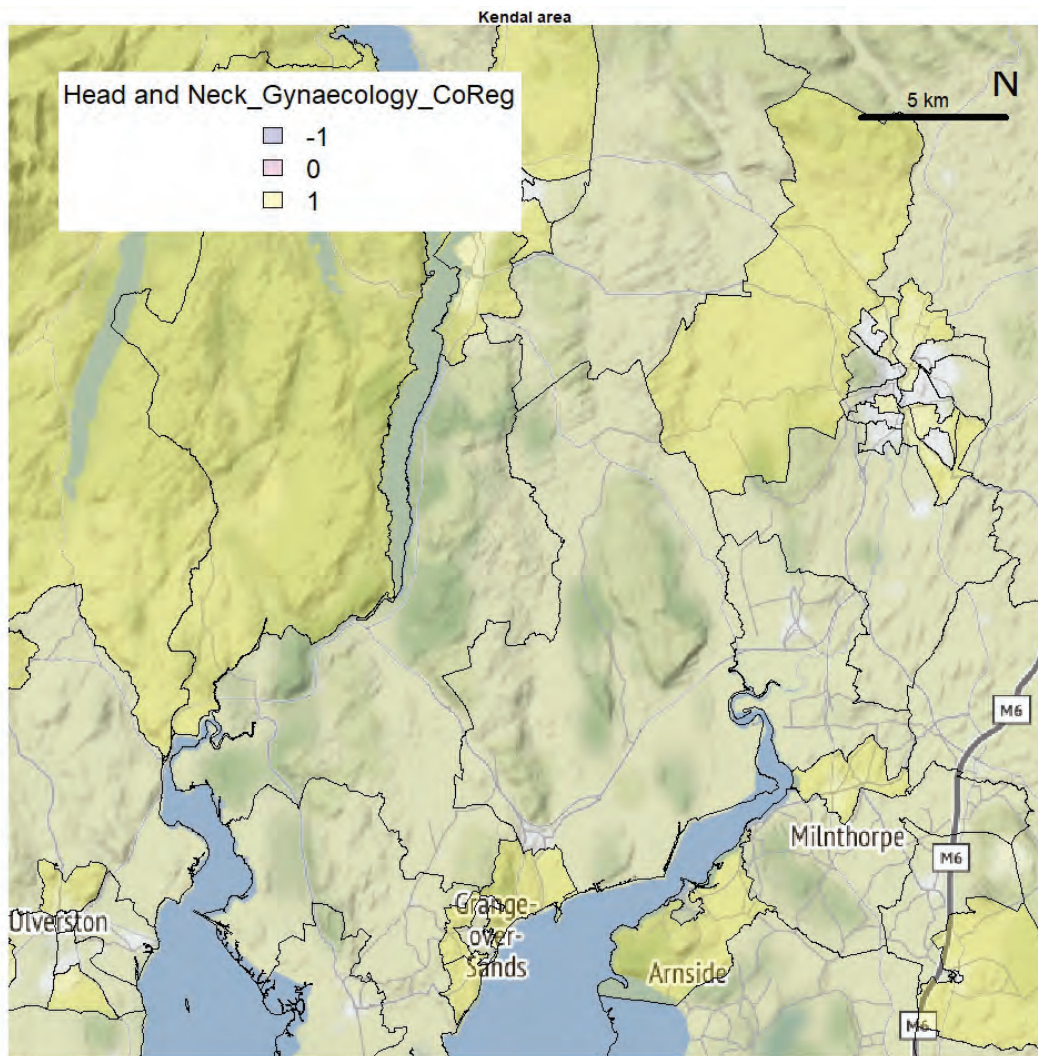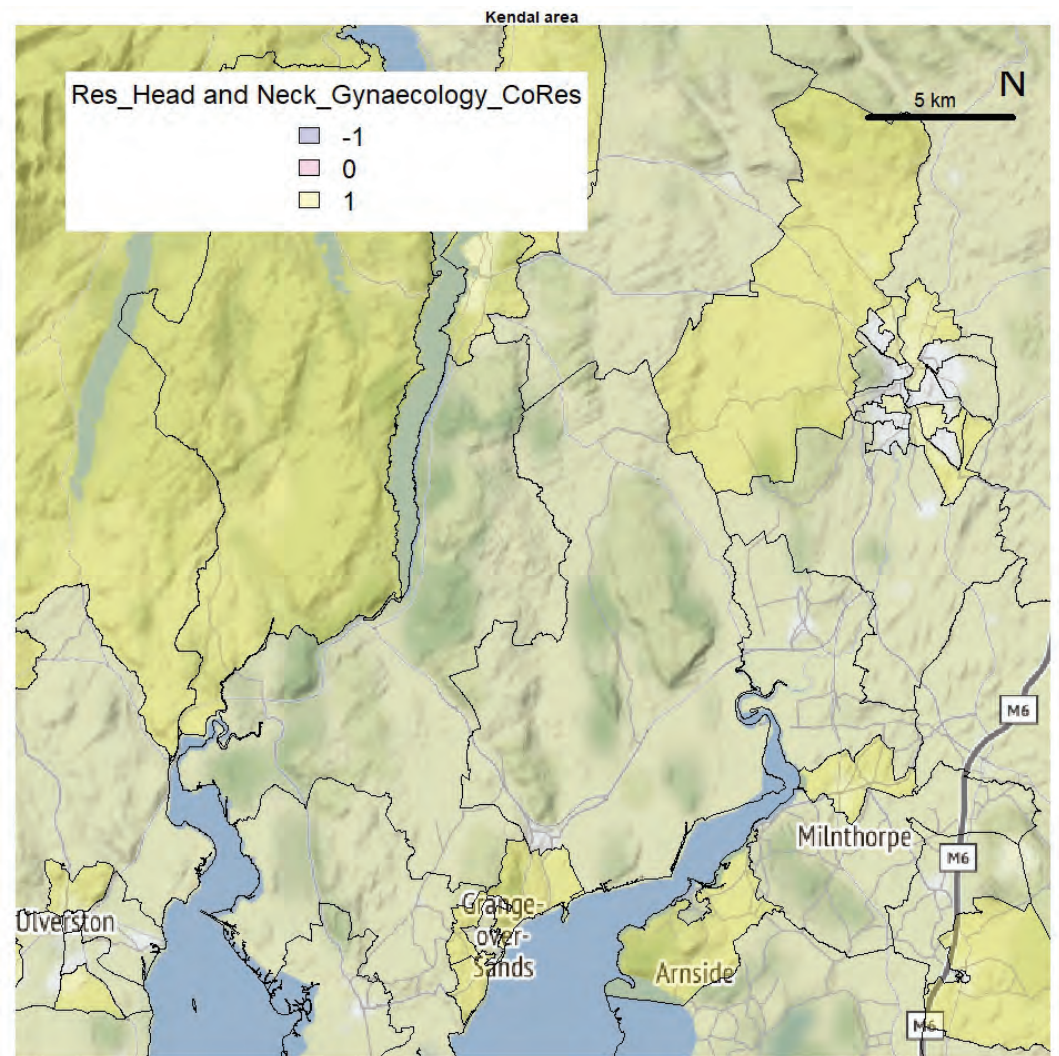

## Supplementary Information 12: Maps interpretation

### *Risk and relative standard errors of a cancer type.*

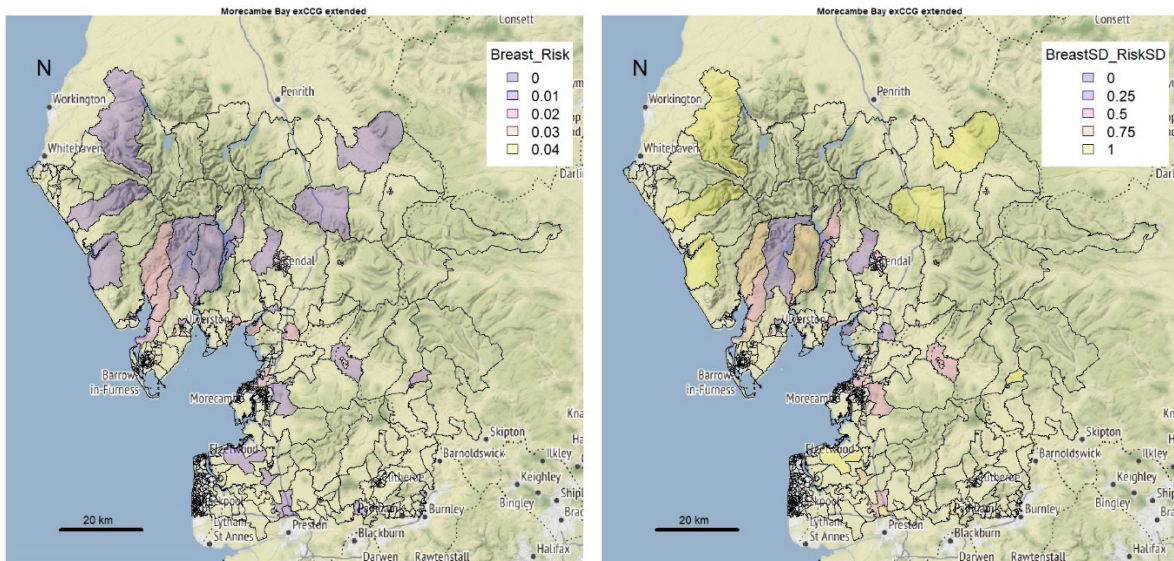

In this example for the Morecambe Bay ex CCG extended study area, on the left is shown the risk (in this case for breast cancer: Breast\_Risk) and on the right the relative errors (BreastSD\_RiskSD). Since the results are from a Bayesian model, the risk is represented by the average posterior incidence per LSOA unit (each polygon in the map is an LSOA unit). The errors representing the uncertainty in the data and model parameters is the posterior standard deviation of the incidence.

Left panel. Risk is measured as incidence, therefore 0.04 is equivalent to a model estimate of 4 cases of breast cancer any 100 women every 6 years for the LSOA area (each polygon is an LSOA unit).

Right panel. The standard errors are scaled on the overall uncertainty. Therefore a value of 1 is representing maximum uncertainty around the incidence value.

*Age standardised risk of a cancer type.*

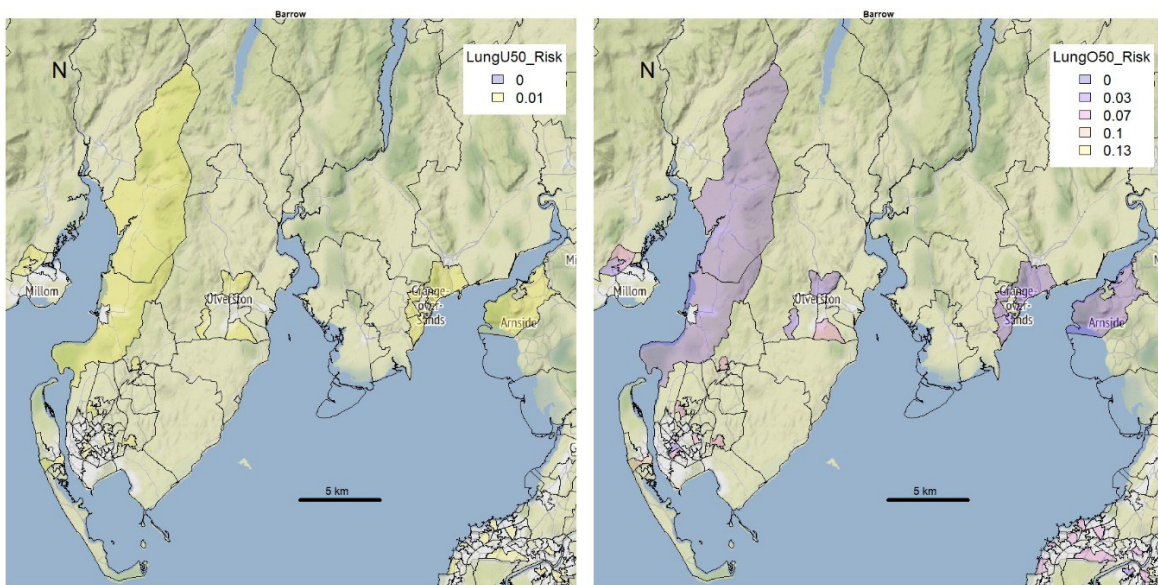

In this example for Barrow in Furness, on the left is shown the standardised risk for lung cancer in under 50 years old (LungU50\_Risk) and on the right for the 50 years old and over (LungO50\_Risk). Since the results are from a Bayesian model, the risk is represented by the average posterior incidence per LSOA unit (each polygon in the map is an LSOA unit).

Risk is measured as incidence. A value of 0.1 on the right panel means 1 case of lung cancer every 10 people of 50 years old and over every 6 years for the LSOA area (each polygon is an LSOA unit).

### Spatial co-regionalisation between any two cancer types.

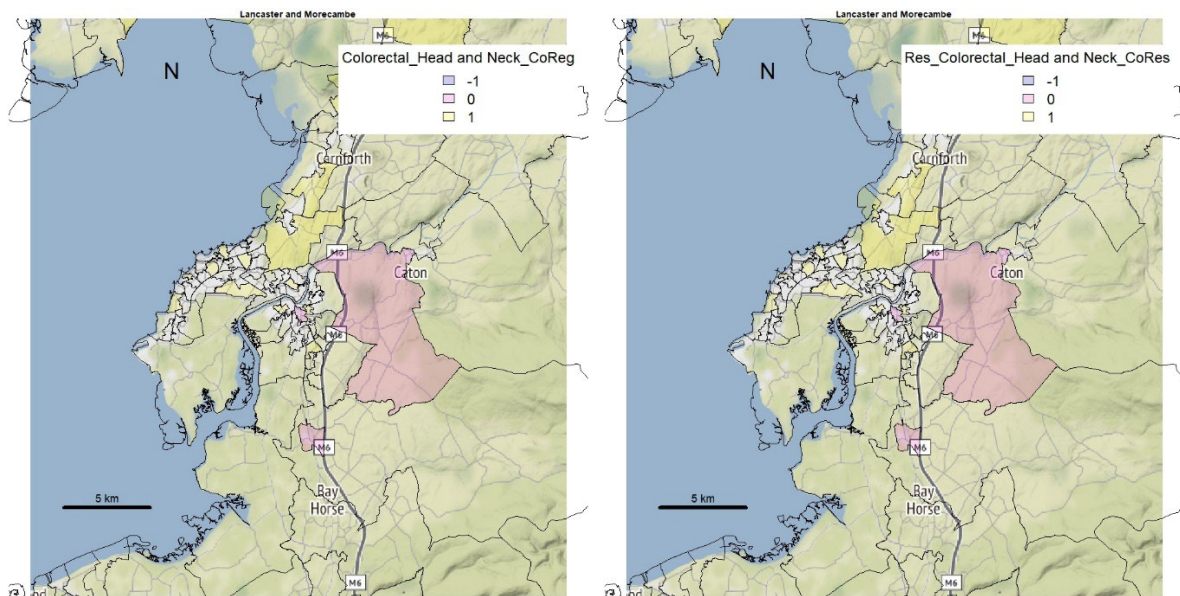

In this example for Morecambe and Lancaster, on the left is shown co-regionalisation between the risks of colorectal and head and neck cancer, while on the right are shown the co-regionalisation between the model's residuals between the same two cancer types.

Legend: -1, one cancer type has large incidence relatively to the low incidence of the other cancer; 0, no significant co-regionalisation between the two cancers; 1, the two cancer types have similar patterns in the high or low incidences.

The positive residual co-regionalisation (on the right panel) is indicating that the two cancers are likely sharing common factors (e.g. socioeconomic, demographic, environmental) that were not included in the model.

## Supplementary Information S13: Model validation.

Model validation results indicate a precise joint model with an error of maximum of 2.5 cases on average per time period (Upper GI, mean squared error) (Table 4). Similar results were obtained when leaving out 10% of the data (root mean squared error and mean squared deviation ratio). The best fitting models based on the DIC and WAIC statistics were for the cancer types highly correlated to each other: gynaecology, haematology, head and neck and upper GI as shown elsewhere (1). The DIC and WAIC results were consistent, although for the latter upper GI was the best fitting model (instead of haematology for DIC).

Supplementary Table. Joint model validation statistics for all data and cross-validated data (indicated with \*)

| Cancer type   | Mean error | Mean squared error | WAIC    | DIC    | Root Mean squared error* | Mean Squared Deviation Ratio* |
|---------------|------------|--------------------|---------|--------|--------------------------|-------------------------------|
| Breast        | -1         | 1                  | -116.19 | 224.96 | 1                        | 0.22                          |
| Colorectal    | -0.8       | 0.93               | -98.17  | 79.36  | 0.96                     | 0.55                          |
| Gynaecology   | -0.8       | 1.03               | -93.71  | 69.92  | 1.01                     | 2.02                          |
| Haematology   | -0.86      | 0.86               | -97.34  | 68.17  | 0.93                     | 1.34                          |
| Head and Neck | -0.58      | 0.89               | -91.14  | 68.21  | 0.94                     | 0.79                          |
| Lung          | -0.66      | 0.8                | -98.45  | 128.61 | 0.89                     | 0.31                          |
| Skin          | -1.4       | 2.33               | -103.44 | 156.94 | 1.52                     | 0.32                          |
| Upper GI      | -0.46      | 2.46               | -88.62  | 69.77  | 1.57                     | 4.92                          |
| Urology       | -1.05      | 1.48               | -99.56  | 77.64  | 1.21                     | 3.3                           |

## References

1. Held L, Natario I, Fenton SE, Rue H, Becker N. Towards joint disease mapping. *Stat Methods Med Res.* 2005;14(1):61-82.

Supplementary Information S14: Extended discussion on significant risk factors found in the study.

In the literature, socioeconomic differences in incidence and survival due to environment, lifestyle, biological effects, access to health care and health seeking behaviour, exist for different cancers even between neighbouring geographical areas (1) and in particular for breast, cervix, lung and malignant melanoma (2). However, this has not been established for childhood leukaemia prevalence in 1993–1994 in England, Wales, and Scotland (3), or colorectal cancer survival between 1991 and 1997 in Bolton (North West of England) (4), although other studies have shown an association with survival and uptake of screening (5, 6). An inverse socio-economic gradient was found for non-melanoma skin cancer rates in different studies covering Ireland (1994-2003) (7), England (2006-2008) (8), and the whole of the UK (2004-2010) (9), and for breast cancer incidence in Wales (1985-2012)(10). In addition, age is a common risk factor for cancers (11).

In this research, for cancer types where age was not found to be a statistically significant factor, frailty or comorbidities may have proxied the age effect. Apart from breast cancer type, at least one ethnic group was always associated to the rest of the cancer types. In terms of ethnicity, the present findings are in agreement with other research for the head and neck (12), and urology cancer types (13), although for other cancer types the present findings are novel. Smoking has been confirmed one of the major risk factors (14), and consistent with other research, for lung cancer (15) and head and neck cancer (16). Interestingly, smoking was found to be protective for the upper GI and gynaecology cancer types, both explained by frailty (that appeared only in these two cancers) which may have masked the effect of smoking (16). The presence of comorbidities as risk factor for most of the cancer types (but not for the skin cancer), has been described for different cancers elsewhere as potential diagnostic driver or because of the interlink between comorbidities, socio-economic status and behaviour (17). For example, diabetes may represent the effects of obesity (a variable not available in this study), which itself is linked to several comorbidities and cancers (18).

Only one socio-economic variable was selected among the many considered in this study (self employed with one parent working), but it was shown that most of the selected variables were correlated with other socio-economic and health factors (19). Deprivation was found to be not significant, in contrast with the large amount of literature linking deprivation or socio-economic status with cancer diagnosis and survival rates (1, 2, 11, 14, 16, 20-23).

Spatial heterogeneity has been observed in other studies where similar risk factors were considered. For example, age, socioeconomic deprivation, ethnicity, and geographical

region were all significantly associated with an incident diagnosis of liver cancer (from primary care data) at the population level (11, 24); for certain leukaemias and lymphomas in the North West (25); head and neck cancer in UK (16); and for joint modelling of lung, bowel and melanoma cancer (26).

The common spatial range for all cancer types was estimated by the joint model to be 15.2 km (95% CI, 14.6–15.8). This shows a relatively moderate range of influence of the shared spatial component. For example, it allows for statistical dependence (or influence) between cancer types in Lancaster and Morecambe with Arnsdale and Silverdale, but not between Lancaster and Morecambe and Barrow-in-Furness.

## References

1. Phillips A, Kehoe S, Singh K, Elattar A, Nevin J, Balega J, et al. Socioeconomic differences impact overall survival in advanced ovarian cancer (AOC) prior to achievement of standard therapy. *Arch Gynecol Obstet*. 2019;300(5):1261-70.
2. Shack L, Jordan C, Thomson CS, Mak V, Moller H, Registries UKAoC. Variation in incidence of breast, lung and cervical cancer and malignant melanoma of skin by socioeconomic group in England. *BMC Cancer*. 2008;8:271.
3. Smith A, Roman E, Simpson J, Ansell P, Fear NT, Eden T. Childhood leukaemia and socioeconomic status: fact or artefact? A report from the United Kingdom childhood cancer study (UKCCS). *Int J Epidemiol*. 2006;35(6):1504-13.
4. Lyratzopoulos G, Sheridan GF, Michie HR, McElduff P, Hobbiss JH. Absence of socioeconomic variation in survival from colorectal cancer in patients receiving surgical treatment in one health district: cohort study. *Colorectal Dis*. 2004;6(6):512-7.
5. Mansouri D, McMillan DC, Grant Y, Crighton EM, Horgan PG. The impact of age, sex and socioeconomic deprivation on outcomes in a colorectal cancer screening programme. *PLoS One*. 2013;8(6):e66063.
6. McCaffery K, Wardle J, Nadel M, Atkin W. Socioeconomic variation in participation in colorectal cancer screening. *J Med Screen*. 2002;9(3):104-8.
7. Carsin AE, Sharp L, Comber H. Geographical, urban/rural and socioeconomic variations in nonmelanoma skin cancer incidence: a population-based study in Ireland. *Br J Dermatol*. 2011;164(4):822-9.
8. Wheeler BW, Kothencz G, Pollard AS. Geography of non-melanoma skin cancer and ecological associations with environmental risk factors in England. *Br J Cancer*. 2013;109(1):235-41.
9. Musah A, Gibson JE, Leonardi-Bee J, Cave MR, Ander EL, Bath-Hextall F. Regional variations of basal cell carcinoma incidence in the U.K. using The Health Improvement Network database (2004-10). *Br J Dermatol*. 2013;169(5):1093-9.
10. Abdulrahman GOJ. Breast cancer in Wales: time trends and geographical distribution. *Gland Surg*. 2014;3(4):237-42.
11. Liao W, Coupland CAC, Innes H, Jepsen P, Matthews PC, Campbell C, et al. Disparities in care and outcomes for primary liver cancer in England during 2008-2018: a cohort study of 8.52 million primary care population using the QResearch database. *EClinicalMedicine*. 2023;59:101969.
12. Moles DR, Fedele S, Speight PM, Porter SR, dos Santos Silva I. Oral and pharyngeal cancer in South Asians and non-South Asians in relation to socioeconomic deprivation in South East England. *Br J Cancer*. 2008;98(3):633-5.
13. DeChello LM, Gregorio DI, Samociuk H. Race-specific geography of prostate cancer incidence. *Int J Health Geogr*. 2006;5:59.



14. Edwards R, Pless-Mullooli T, Howel D, Chadwick T, Bhopal R, Harrison R, Gribbin H. Does living near heavy industry cause lung cancer in women? A case-control study using life grid interviews. *Thorax*. 2006;61(12):1076-82.
15. Tomintz M, Kosar B, Clarke G. smokeSALUD: exploring the effect of demographic change on the smoking prevalence at municipality level in Austria. *Int J Health Geogr*. 2016;15(1):36.
16. Taib BG, Oakley J, Dailey Y, Hodge I, Wright P, du Plessis R, et al. Socioeconomic deprivation and the burden of head and neck cancer-Regional variations of incidence and mortality in Merseyside and Cheshire, North West, England. *Clin Otolaryngol*. 2018;43(3):846-53.
17. Grose D, Morrison DS, Devereux G, Jones R, Sharma D, Selby C, et al. Comorbidities in lung cancer: prevalence, severity and links with socioeconomic status and treatment. *Postgrad Med J*. 2014;90(1064):305-10.
18. Ellaway A, Lamb KE, Ferguson NS, Ogilvie D. Associations between access to recreational physical activity facilities and body mass index in Scottish adults. *BMC Public Health*. 2016;16:756.
19. Chaturvedi N. Ethnicity as an epidemiological determinant—crudely racist or crucially important? *International Journal of Epidemiology*. 2001;30(5):925-7 %@ 0300-5771.
20. Bithell JF, Murphy MF, Stiller CA, Toumpakari E, Vincent T, Wakeford R. Leukaemia in young children in the vicinity of British nuclear power plants: a case-control study. *Br J Cancer*. 2013;109(11):2880-5.
21. Chambers AC, Dixon SW, White P, Williams AC, Thomas MG, Messenger DE. Demographic trends in the incidence of young-onset colorectal cancer: a population-based study. *Br J Surg*. 2020;107(5):595-605.
22. Rogers SN, Staunton A, Girach R, Langton S, Lowe D. Audit of the two-week pathway for patients with suspected cancer of the head and neck and the influence of socioeconomic status. *Br J Oral Maxillofac Surg*. 2019;57(5):419-24.
23. Rafiq M, Hayward A, Warren-Gash C, Denaxas S, Gonzalez-Izquierdo A, Lyratzopoulos G, Thomas S. Socioeconomic deprivation and regional variation in Hodgkin's lymphoma incidence in the UK: a population-based cohort study of 10 million individuals. *BMJ Open*. 2019;9(9):e029228.
24. Burton A, Balachandrakumar VK, Driver RJ, Tataru D, Paley L, Marshall A, et al. Regional variations in hepatocellular carcinoma incidence, routes to diagnosis, treatment and survival in England. *Br J Cancer*. 2022;126(5):804-14.
25. McNally RJ, Alston RD, Cairns DP, Eden OB, Birch JM. Geographical and ecological analyses of childhood acute leukaemias and lymphomas in north-west England. *Br J Haematol*. 2003;123(1):60-5.
26. Jahan F, Duncan EW, Cramb SM, Baade PD, Mengersen KL. Multivariate Bayesian meta-analysis: joint modelling of multiple cancer types using summary statistics. *Int J Health Geogr*. 2020;19(1):42.

Supplementary Table S8. Cancer screening in England, North West and Lancashire and relative cancer rates (sources: <https://digital.nhs.uk/data-and-information/publications/statistical/breast-screening-programme>; <https://digital.nhs.uk/data-and-information/publications/statistical/cervical-screening-annual>; <https://www.gov.uk/government/publications/bowel-cancer-screening-annual-report-2021-to-2022#full-publication-update-history>). Coverage expressed in % and rates in per 1,000 individuals.

| <b>Region/year</b>            | <b>Breast screening coverage<sup>1</sup></b> | <b>Breast cancer rate<sup>3</sup></b> | <b>% Breast non or micro invasive</b> | <b>Cervical cancer coverage<sup>4</sup></b> | <b>Cervical cancer rate<sup>5</sup></b> | <b>% Cervical low grade</b> | <b>Bowel cancer coverage<sup>6</sup></b> | <b>Bowel cancer rate<sup>6</sup></b> |
|-------------------------------|----------------------------------------------|---------------------------------------|---------------------------------------|---------------------------------------------|-----------------------------------------|-----------------------------|------------------------------------------|--------------------------------------|
| <i>England</i>                |                                              |                                       |                                       |                                             |                                         |                             |                                          |                                      |
| 2016-17                       | 75.4                                         | 8.4                                   | 47.6                                  | 21.3                                        | 3.5                                     | 39.7                        | NA                                       | NA                                   |
| 2017-18                       | 74.9                                         | 8.4                                   | 48.9                                  | 21.0                                        | 3.3                                     | 39.5                        | NA                                       | NA                                   |
| 2018-19                       | 74.6                                         | 8.8                                   | 48.8                                  | 22.2                                        | 3.3                                     | 40.3                        | NA                                       | NA                                   |
| 2019-20                       | 74.2                                         | 8.4                                   | 49.4                                  | 20.5                                        | 3.3                                     | 45.2                        | NA                                       | NA                                   |
| 2020-21                       | 64.2                                         | 9.1                                   | 51.4                                  | 19.2                                        | 3.5                                     | 49.7                        | NA                                       | NA                                   |
| 2021-22                       | 65.3                                         | 9.2                                   | 52.5                                  | 21.8                                        | 3.6                                     | 51.7                        | 70.3                                     | 2.0                                  |
| 2022-23                       | 66.4                                         | 8.7                                   | 52.7                                  | 21.0                                        | 3.6                                     | 51.5                        | NA                                       | NA                                   |
| <i>North West</i>             |                                              |                                       |                                       |                                             |                                         |                             |                                          |                                      |
| 2016-17                       | 72.5                                         | 8.6                                   | 48.0                                  | 21.2                                        | 3.9                                     | 42.0                        | NA                                       | NA                                   |
| 2017-18                       | 72.8                                         | 8.6                                   | 49.1                                  | 21.1                                        | 3.8                                     | 41.7                        | NA                                       | NA                                   |
| 2018-19                       | 73.2                                         | 9.0                                   | 48.8                                  | 22.9                                        | 3.6                                     | 44.4                        | NA                                       | NA                                   |
| 2019-20                       | 72.3                                         | 8.2                                   | 50.4                                  | 21.2                                        | 3.2                                     | 49.4                        | NA                                       | NA                                   |
| 2020-21                       | 62.0                                         | 9.3                                   | 54.9                                  | 19.5                                        | 3.5                                     | 49.4                        | NA                                       | NA                                   |
| 2021-22                       | 62.8                                         | 9.2                                   | 52.9                                  | 21.8                                        | 3.4                                     | 50.7                        | 68.0                                     | 2.3                                  |
| 2022-23                       | 65.4                                         | 8.7                                   | 53.0                                  | 21.1                                        | 3.0                                     | 52.5                        | NA                                       | NA                                   |
| <i>Lancashire<sup>2</sup></i> |                                              |                                       |                                       |                                             |                                         |                             |                                          |                                      |

|         |      |      |      |      |     |      |    |    |
|---------|------|------|------|------|-----|------|----|----|
| 2016-17 | 74.1 | 9.1  | 52.0 | 21.0 | 3.4 | 42.7 | NA | NA |
| 2017-18 | 73.9 | 9.2  | 47.3 | 21.0 | 3.6 | 44.2 | NA | NA |
| 2018-19 | 75.0 | 8.8  | 42.6 | 22.7 | 2.6 | 45.1 | NA | NA |
| 2019-20 | 74.1 | 8.3  | 45.4 | 21.0 | 2.7 | 48.8 | NA | NA |
| 2020-21 | 60.6 | 10.2 | 44.2 | 19.2 | 3.3 | 48.9 | NA | NA |
| 2021-22 | 63.5 | 9.6  | 57.3 | 21.8 | 3.3 | 48.0 | NA | NA |
| 2022-23 | 68.5 | 9.8  | 50.7 | 21.2 | 3.1 | 52.4 | NA | NA |

<sup>1</sup> Relative to 53-70 age group. <sup>2</sup> Breast cancer rates are relative to North Lancashire and South Cumbria. <sup>3</sup> Rates for 45 years old and over, considering invasive and non-invasive breast cancer. <sup>4</sup> 25-64 age group. <sup>5</sup> Dyskaryosis - low to severe. <sup>6</sup> data relative to 2020-2022 period for age 50 to 74.
